# Supplementary material
Source: PubMed Central journal article supplement (PMC4070715)
Supplement: NIHMS587873-supplement-Supplement_1.pdf [file NIHMS587873-supplement-Supplement_1.pdf]

| Category | Term                                                                    | Count | Count i | P-value  | Enrichment s |
|----------|-------------------------------------------------------------------------|-------|---------|----------|--------------|
| GO       | extracellular region                                                    | 181   | 1730    | 2.32E-09 | 6.27166781   |
| GO       | response to glucocorticoid stimulus                                     | 17    | 71      | 4.23E-06 | 5.72349811   |
| GO       | integral to plasma membrane                                             | 103   | 969     | 4.39E-06 | 4.80518264   |
| GO       | extracellular space                                                     | 75    | 647     | 4.61E-06 | 4.87892193   |
| GO       | complement activation, classical pathway                                | 10    | 27      | 6.18E-06 | 6.22340428   |
| GO       | cell surface                                                            | 33    | 214     | 9.22E-06 | 5.00545963   |
| GO       | negative regulation of cell proliferation                               | 39    | 287     | 3.09E-05 | 4.56887372   |
| GO       | sequence-specific DNA binding                                           | 57    | 487     | 4.83E-05 | 4.31407689   |
| GO       | transcription factor activity                                           | 94    | 922     | 5.83E-05 | 4.14536776   |
| GO       | response to lipopolysaccharide                                          | 19    | 105     | 8.24E-05 | 4.58512879   |
| GO       | response to protein stimulus                                            | 11    | 42      | 8.68E-05 | 4.97635904   |
| GO       | positive regulation of peptidyl-tyrosine phosphorylation                | 11    | 42      | 8.68E-05 | 4.97635904   |
| GO       | membrane                                                                | 302   | 3643    | 8.69E-05 | 3.87128531   |
| GO       | transmembrane receptor protein tyrosine phosphatase activity            | 7     | 18      | 0.000112 | 5.39167485   |
| GO       | response to progesterone stimulus                                       | 8     | 24      | 0.000127 | 5.14754434   |
| GO       | innate immune response                                                  | 19    | 109     | 0.000138 | 4.39661919   |
| GO       | negative regulation of ERK1 and ERK2 cascade                            | 5     | 9       | 0.000148 | 5.79343807   |
| GO       | Rho guanyl-nucleotide exchange factor activity                          | 14    | 68      | 0.00017  | 4.50238222   |
| GO       | integral to membrane                                                    | 315   | 3857    | 0.000179 | 3.67260466   |
| GO       | rhythmic process                                                        | 6     | 14      | 0.000188 | 5.34311137   |
| GO       | steroid hormone receptor activity                                       | 11    | 46      | 0.00021  | 4.59564659   |
| GO       | positive regulation of NF-kappaB transcription factor activity          | 11    | 47      | 0.000258 | 4.5070577    |
| GO       | negative regulation of fibroblast growth factor receptor signaling path | 4     | 6       | 0.000291 | 5.80864705   |
| GO       | cardiac muscle cell proliferation                                       | 4     | 6       | 0.000291 | 5.80864705   |
| GO       | pathogen-associated molecular pattern dependent induction by symb       | 4     | 6       | 0.000291 | 5.80864705   |
| GO       | transcription repressor activity                                        | 25    | 173     | 0.000304 | 3.98784591   |
| GO       | piRNA binding                                                           | 3     | 3       | 0.000319 | 6.39509339   |
| GO       | insulin-like growth factor binding protein complex                      | 3     | 3       | 0.000319 | 6.39509339   |
| GO       | mesodermal cell fate determination                                      | 3     | 3       | 0.000319 | 6.39509339   |
| GO       | positive regulation of macrophage cytokine production                   | 3     | 3       | 0.000319 | 6.39509339   |
| GO       | response to glucose stimulus                                            | 12    | 57      | 0.000393 | 4.26011511   |
| GO       | ligand-dependent nuclear receptor activity                              | 8     | 28      | 0.000421 | 4.56130989   |
| GO       | response to light stimulus                                              | 6     | 16      | 0.000444 | 4.86280549   |
| GO       | positive regulation of gene-specific transcription from RNA polymerasi  | 16    | 92      | 0.000466 | 4.02222337   |
| GO       | positive regulation of smooth muscle cell proliferation                 | 8     | 29      | 0.000547 | 4.43176129   |
| GO       | positive regulation of osteoclast differentiation                       | 4     | 7       | 0.000643 | 5.27551414   |
| GO       | negative regulation of cell death                                       | 4     | 7       | 0.000643 | 5.27551414   |
| GO       | cellular response to lipopolysaccharide                                 | 4     | 7       | 0.000643 | 5.27551414   |
| GO       | microglial cell activation during immune response                       | 4     | 7       | 0.000643 | 5.27551414   |
| GO       | signal transduction                                                     | 157   | 1796    | 0.000654 | 3.3653997    |
| GO       | regulation of apoptosis                                                 | 18    | 114     | 0.00071  | 3.80020595   |
| GO       | ion transport                                                           | 54    | 505     | 0.000721 | 3.48246795   |
| GO       | positive regulation of tumor necrosis factor production                 | 5     | 12      | 0.000781 | 4.78302593   |
| GO       | lipoprotein metabolic process                                           | 6     | 18      | 0.000915 | 4.45719923   |
| GO       | regulation of Rho protein signal transduction                           | 13    | 71      | 0.000939 | 3.83879701   |
| GO       | plasma membrane                                                         | 228   | 2763    | 0.001019 | 3.19319655   |
| GO       | voltage-gated ion channel activity                                      | 21    | 147     | 0.001035 | 3.59379216   |
| GO       | anchored to membrane                                                    | 17    | 109     | 0.001136 | 3.63530314   |

|                                                                                                      |    |      |          |            |
|------------------------------------------------------------------------------------------------------|----|------|----------|------------|
| GO positive regulation of chemokine production                                                       | 5  | 13   | 0.001198 | 4.52035837 |
| GO epithelial cell maturation involved in prostate gland development                                 | 3  | 4    | 0.001209 | 5.40302105 |
| GO activin receptor activity, type I                                                                 | 3  | 4    | 0.001209 | 5.40302105 |
| GO secretory columnar luminal epithelial cell differentiation involved in prostate gland development | 3  | 4    | 0.001209 | 5.40302105 |
| GO positive regulation of toll-like receptor signaling pathway                                       | 3  | 4    | 0.001209 | 5.40302105 |
| GO apical plasma membrane                                                                            | 22 | 159  | 0.001222 | 3.51336832 |
| GO immune response                                                                                   | 35 | 303  | 0.001637 | 3.27957156 |
| GO response to retinoic acid                                                                         | 8  | 34   | 0.001706 | 3.86102647 |
| GO response to cytokine stimulus                                                                     | 10 | 50   | 0.001784 | 3.69387928 |
| GO positive regulation of transcription from RNA polymerase II promoter                              | 34 | 295  | 0.001964 | 3.21764375 |
| GO retinol metabolic process                                                                         | 4  | 9    | 0.002071 | 4.47220331 |
| GO response to fatty acid                                                                            | 4  | 9    | 0.002071 | 4.47220331 |
| GO ligand-regulated transcription factor activity                                                    | 4  | 9    | 0.002071 | 4.47220331 |
| GO positive regulation of interleukin-12 production                                                  | 4  | 9    | 0.002071 | 4.47220331 |
| GO circadian rhythm                                                                                  | 8  | 35   | 0.002081 | 3.75974575 |
| GO positive regulation of interleukin-6 production                                                   | 6  | 21   | 0.002241 | 3.94948136 |
| GO multicellular organismal development                                                              | 83 | 890  | 0.002322 | 3.01643691 |
| GO filopodium assembly                                                                               | 5  | 15   | 0.002491 | 4.06852596 |
| GO cell adhesion                                                                                     | 53 | 522  | 0.002514 | 3.04663053 |
| GO scavenger receptor activity                                                                       | 9  | 44   | 0.00254  | 3.58423773 |
| GO negative regulation of nerve growth factor receptor signaling pathway                             | 3  | 5    | 0.002869 | 4.71159348 |
| GO insulin binding                                                                                   | 3  | 5    | 0.002869 | 4.71159348 |
| GO placenta blood vessel development                                                                 | 3  | 5    | 0.002869 | 4.71159348 |
| GO lipopolysaccharide receptor activity                                                              | 3  | 5    | 0.002869 | 4.71159348 |
| GO regulation of transcription, DNA-dependent                                                        | 92 | 1013 | 0.003009 | 2.91294452 |
| GO response to drug                                                                                  | 27 | 225  | 0.003112 | 3.08861225 |
| GO positive regulation of Ras protein signal transduction                                            | 4  | 10   | 0.003266 | 4.15714422 |
| GO receptor signaling protein tyrosine kinase activity                                               | 4  | 10   | 0.003266 | 4.15714422 |
| GO positive regulation of tyrosine phosphorylation of Stat3 protein                                  | 4  | 10   | 0.003266 | 4.15714422 |
| GO positive regulation of interleukin-8 production                                                   | 4  | 10   | 0.003266 | 4.15714422 |
| GO response to cAMP                                                                                  | 9  | 46   | 0.003492 | 3.42567314 |
| GO potassium channel regulator activity                                                              | 6  | 23   | 0.003706 | 3.6610393  |
| GO odontogenesis                                                                                     | 6  | 23   | 0.003706 | 3.6610393  |
| GO regulation of cell proliferation                                                                  | 12 | 73   | 0.003733 | 3.25782225 |
| GO response to organic cyclic substance                                                              | 14 | 92   | 0.003772 | 3.193921   |
| GO membrane raft                                                                                     | 15 | 103  | 0.004249 | 3.11660156 |
| GO regulation of long-term neuronal synaptic plasticity                                              | 5  | 17   | 0.004577 | 3.69047681 |
| GO negative regulation of Ras GTPase activity                                                        | 2  | 2    | 0.004668 | 5.22143439 |
| GO bud elongation involved in lung branching                                                         | 2  | 2    | 0.004668 | 5.22143439 |
| GO blood vessel endothelial cell proliferation involved in sprouting angiogenesis                    | 2  | 2    | 0.004668 | 5.22143439 |
| GO positive regulation of dopamine uptake                                                            | 2  | 2    | 0.004668 | 5.22143439 |
| GO establishment of blood-nerve barrier                                                              | 2  | 2    | 0.004668 | 5.22143439 |
| GO lymph vessel development                                                                          | 2  | 2    | 0.004668 | 5.22143439 |
| GO positive regulation of glycoprotein biosynthetic process                                          | 2  | 2    | 0.004668 | 5.22143439 |
| GO positive regulation of interleukin-3 biosynthetic process                                         | 2  | 2    | 0.004668 | 5.22143439 |
| GO serotonin secretion                                                                               | 2  | 2    | 0.004668 | 5.22143439 |
| GO Ral guanyl-nucleotide exchange factor activity                                                    | 2  | 2    | 0.004668 | 5.22143439 |
| GO regulation of low-density lipoprotein receptor catabolic process                                  | 2  | 2    | 0.004668 | 5.22143439 |
| GO prostate gland stromal morphogenesis                                                              | 2  | 2    | 0.004668 | 5.22143439 |

|                                                                       |     |      |          |            |
|-----------------------------------------------------------------------|-----|------|----------|------------|
| GO hepatic immune response                                            | 2   | 2    | 0.004668 | 5.22143439 |
| GO response to iron(II) ion                                           | 2   | 2    | 0.004668 | 5.22143439 |
| GO axon target recognition                                            | 2   | 2    | 0.004668 | 5.22143439 |
| GO RNA destabilization                                                | 2   | 2    | 0.004668 | 5.22143439 |
| GO response to exogenous dsRNA                                        | 4   | 11   | 0.004857 | 3.88209859 |
| GO neural crest cell development                                      | 4   | 11   | 0.004857 | 3.88209859 |
| GO cell fate determination                                            | 4   | 11   | 0.004857 | 3.88209859 |
| GO myoblast fusion                                                    | 4   | 11   | 0.004857 | 3.88209859 |
| GO proteinaceous extracellular matrix                                 | 26  | 223  | 0.00538  | 2.87181754 |
| GO regulation of blood pressure                                       | 9   | 49   | 0.005419 | 3.20318458 |
| GO regulation of hydrogen peroxide metabolic process                  | 3   | 6    | 0.005446 | 4.19059941 |
| GO response to peptidoglycan                                          | 3   | 6    | 0.005446 | 4.19059941 |
| GO positive regulation of organ growth                                | 3   | 6    | 0.005446 | 4.19059941 |
| GO chromatin DNA binding                                              | 3   | 6    | 0.005446 | 4.19059941 |
| GO insulin-like growth factor I binding                               | 3   | 6    | 0.005446 | 4.19059941 |
| GO lipid binding                                                      | 16  | 116  | 0.005518 | 2.97892851 |
| GO phosphatidylinositol binding                                       | 5   | 18   | 0.005985 | 3.52272361 |
| GO metal ion binding                                                  | 213 | 2658 | 0.006011 | 2.59675014 |
| GO sarcolemma                                                         | 10  | 59   | 0.006254 | 3.08345325 |
| GO positive regulation of apoptosis                                   | 15  | 108  | 0.006635 | 2.91332224 |
| GO cell-cell signaling                                                | 27  | 238  | 0.006655 | 2.77443809 |
| GO lung development                                                   | 10  | 60   | 0.007057 | 3.02270894 |
| GO response to hypoxia                                                | 18  | 140  | 0.007087 | 2.83421857 |
| GO zinc ion binding                                                   | 154 | 1867 | 0.007194 | 2.54919044 |
| GO B cell differentiation                                             | 7   | 34   | 0.007213 | 3.18080871 |
| GO palate development                                                 | 7   | 34   | 0.007213 | 3.18080871 |
| GO protein amino acid dephosphorylation                               | 16  | 120  | 0.007642 | 2.82995576 |
| GO leukotriene biosynthetic process                                   | 5   | 19   | 0.007673 | 3.36668991 |
| GO insulin-like growth factor binding                                 | 5   | 19   | 0.007673 | 3.36668991 |
| GO response to estradiol stimulus                                     | 10  | 61   | 0.007937 | 2.96317511 |
| GO basement membrane                                                  | 10  | 61   | 0.007937 | 2.96317511 |
| GO kidney development                                                 | 10  | 61   | 0.007937 | 2.96317511 |
| GO positive regulation of cell proliferation                          | 31  | 290  | 0.008997 | 2.62147079 |
| GO transmembrane receptor protein tyrosine phosphatase signaling path | 3   | 7    | 0.009049 | 3.77745366 |
| GO negative regulation of smooth muscle cell migration                | 3   | 7    | 0.009049 | 3.77745366 |
| GO GTP-Rho binding                                                    | 3   | 7    | 0.009049 | 3.77745366 |
| GO positive regulation of pseudopodium assembly                       | 3   | 7    | 0.009049 | 3.77745366 |
| GO P granule                                                          | 3   | 7    | 0.009049 | 3.77745366 |
| GO piRNA metabolic process                                            | 3   | 7    | 0.009049 | 3.77745366 |
| GO natriuresis                                                        | 3   | 7    | 0.009049 | 3.77745366 |
| GO drinking behavior                                                  | 3   | 7    | 0.009049 | 3.77745366 |
| GO regulation of organ growth                                         | 3   | 7    | 0.009049 | 3.77745366 |
| GO neurotransmitter biosynthetic process                              | 3   | 7    | 0.009049 | 3.77745366 |
| GO positive regulation of glycolysis                                  | 3   | 7    | 0.009049 | 3.77745366 |
| GO osteoclast differentiation                                         | 3   | 7    | 0.009049 | 3.77745366 |
| GO positive regulation of fatty acid beta-oxidation                   | 3   | 7    | 0.009049 | 3.77745366 |
| GO calcium-activated potassium channel activity                       | 4   | 13   | 0.009427 | 3.42090875 |
| GO insulin-like growth factor receptor binding                        | 4   | 13   | 0.009427 | 3.42090875 |
| GO inflammatory response                                              | 25  | 222  | 0.009603 | 2.62895529 |

|                                                                          |    |     |          |            |
|--------------------------------------------------------------------------|----|-----|----------|------------|
| GO integral to Golgi membrane                                            | 8  | 45  | 0.010411 | 2.91242389 |
| GO protein dimerization activity                                         | 12 | 84  | 0.01154  | 2.71212167 |
| GO branching morphogenesis of a tube                                     | 5  | 21  | 0.011985 | 3.08425664 |
| GO negative regulation of BMP signaling pathway                          | 5  | 21  | 0.011985 | 3.08425664 |
| GO induction of apoptosis                                                | 20 | 170 | 0.01228  | 2.55865965 |
| GO cell fate commitment                                                  | 6  | 29  | 0.012282 | 2.95890235 |
| GO positive regulation of vasodilation                                   | 4  | 14  | 0.012495 | 3.22414322 |
| GO negative regulation of tumor necrosis factor production               | 4  | 14  | 0.012495 | 3.22414322 |
| GO cytoskeletal adaptor activity                                         | 4  | 14  | 0.012495 | 3.22414322 |
| GO complement activation, alternative pathway                            | 4  | 14  | 0.012495 | 3.22414322 |
| GO negative regulation of transcription from RNA polymerase II promoter  | 25 | 227 | 0.012514 | 2.50976116 |
| GO transcription activator activity                                      | 25 | 227 | 0.012514 | 2.50976116 |
| GO epidermis development                                                 | 11 | 75  | 0.012619 | 2.69310063 |
| GO double-stranded DNA binding                                           | 11 | 75  | 0.012619 | 2.69310063 |
| GO axon                                                                  | 16 | 127 | 0.012895 | 2.58256753 |
| GO endoplasmic reticulum membrane                                        | 49 | 518 | 0.013107 | 2.40015136 |
| GO regulation of potassium ion transport                                 | 2  | 3   | 0.013367 | 4.10700924 |
| GO homotypic cell-cell adhesion                                          | 2  | 3   | 0.013367 | 4.10700924 |
| GO negative regulation of lipopolysaccharide-mediated signaling pathway  | 2  | 3   | 0.013367 | 4.10700924 |
| GO regulation of MAP kinase activity                                     | 2  | 3   | 0.013367 | 4.10700924 |
| GO ubiquitin-protein ligase regulator activity                           | 2  | 3   | 0.013367 | 4.10700924 |
| GO activin receptor complex                                              | 2  | 3   | 0.013367 | 4.10700924 |
| GO dense core granule                                                    | 2  | 3   | 0.013367 | 4.10700924 |
| GO positive regulation of monocyte differentiation                       | 2  | 3   | 0.013367 | 4.10700924 |
| GO negative regulation of extracellular matrix disassembly               | 2  | 3   | 0.013367 | 4.10700924 |
| GO endothelial cell activation                                           | 2  | 3   | 0.013367 | 4.10700924 |
| GO regulation of pathway-restricted SMAD protein phosphorylation         | 2  | 3   | 0.013367 | 4.10700924 |
| GO dopamine receptor activity, coupled via Gi/Go                         | 2  | 3   | 0.013367 | 4.10700924 |
| GO response to histamine                                                 | 2  | 3   | 0.013367 | 4.10700924 |
| GO nitric oxide transport                                                | 2  | 3   | 0.013367 | 4.10700924 |
| GO positive regulation of sarcomere organization                         | 2  | 3   | 0.013367 | 4.10700924 |
| GO brain segmentation                                                    | 2  | 3   | 0.013367 | 4.10700924 |
| GO positive regulation of granulocyte macrophage colony-stimulating fact | 2  | 3   | 0.013367 | 4.10700924 |
| GO negative regulation of low-density lipoprotein particle clearance     | 2  | 3   | 0.013367 | 4.10700924 |
| GO glutamate decarboxylase activity                                      | 2  | 3   | 0.013367 | 4.10700924 |
| GO cerebral cortex neuron differentiation                                | 2  | 3   | 0.013367 | 4.10700924 |
| GO negative regulation of T-helper 2 cell differentiation                | 2  | 3   | 0.013367 | 4.10700924 |
| GO interleukin-6 receptor complex                                        | 2  | 3   | 0.013367 | 4.10700924 |
| GO interleukin-6-mediated signaling pathway                              | 2  | 3   | 0.013367 | 4.10700924 |
| GO germ cell programmed cell death                                       | 2  | 3   | 0.013367 | 4.10700924 |
| GO laminin-11 complex                                                    | 2  | 3   | 0.013367 | 4.10700924 |
| GO protein-lysine 6-oxidase activity                                     | 2  | 3   | 0.013367 | 4.10700924 |
| GO common-partner SMAD protein phosphorylation                           | 2  | 3   | 0.013367 | 4.10700924 |
| GO positive regulation of keratinocyte differentiation                   | 2  | 3   | 0.013367 | 4.10700924 |
| GO pancreatic polypeptide receptor activity                              | 2  | 3   | 0.013367 | 4.10700924 |
| GO xenobiotic-transporting ATPase activity                               | 2  | 3   | 0.013367 | 4.10700924 |
| GO negative regulation of B cell apoptosis                               | 2  | 3   | 0.013367 | 4.10700924 |
| GO negative regulation of T-helper 2 type immune response                | 2  | 3   | 0.013367 | 4.10700924 |
| GO negative regulation of prostatic bud formation                        | 2  | 3   | 0.013367 | 4.10700924 |

|    |                                                                        |     |      |          |            |
|----|------------------------------------------------------------------------|-----|------|----------|------------|
| GO | microglial cell activation                                             | 2   | 3    | 0.013367 | 4.10700924 |
| GO | cellular response to lipoteichoic acid                                 | 2   | 3    | 0.013367 | 4.10700924 |
| GO | low voltage-gated calcium channel activity                             | 2   | 3    | 0.013367 | 4.10700924 |
| GO | regulation of protein binding                                          | 3   | 8    | 0.013749 | 3.43779811 |
| GO | positive regulation of SMAD protein nuclear translocation              | 3   | 8    | 0.013749 | 3.43779811 |
| GO | regulation of ossification                                             | 3   | 8    | 0.013749 | 3.43779811 |
| GO | negative regulation of calcium ion transport via voltage-gated calcium | 3   | 8    | 0.013749 | 3.43779811 |
| GO | oxidative demethylation                                                | 3   | 8    | 0.013749 | 3.43779811 |
| GO | retinal metabolic process                                              | 3   | 8    | 0.013749 | 3.43779811 |
| GO | diuresis                                                               | 3   | 8    | 0.013749 | 3.43779811 |
| GO | heart trabecula formation                                              | 3   | 8    | 0.013749 | 3.43779811 |
| GO | positive regulation of NF-kappaB import into nucleus                   | 3   | 8    | 0.013749 | 3.43779811 |
| GO | integrin-mediated signaling pathway                                    | 9   | 57   | 0.01458  | 2.68310357 |
| GO | lyase activity                                                         | 13  | 97   | 0.014654 | 2.56968202 |
| GO | endomembrane system                                                    | 11  | 77   | 0.015215 | 2.59617825 |
| GO | ureteric bud development                                               | 7   | 39   | 0.015332 | 2.75323672 |
| GO | positive regulation of gene-specific transcription                     | 7   | 39   | 0.015332 | 2.75323672 |
| GO | regulation of mitotic cell cycle                                       | 4   | 15   | 0.016133 | 3.04494013 |
| GO | neural tube development                                                | 4   | 15   | 0.016133 | 3.04494013 |
| GO | cholesterol metabolic process                                          | 9   | 58   | 0.016244 | 2.62432456 |
| GO | SMAD binding                                                           | 6   | 31   | 0.016951 | 2.7646427  |
| GO | intracellular                                                          | 145 | 1794 | 0.017287 | 2.20069861 |
| GO | blood vessel development                                               | 7   | 40   | 0.017519 | 2.6758052  |
| GO | positive regulation of glucose import                                  | 5   | 23   | 0.017697 | 2.83424487 |
| GO | negative regulation of cell adhesion                                   | 5   | 23   | 0.017697 | 2.83424487 |
| GO | SH3/SH2 adaptor activity                                               | 8   | 50   | 0.019214 | 2.57156168 |
| GO | response to estrogen stimulus                                          | 8   | 50   | 0.019214 | 2.57156168 |
| GO | blood vessel morphogenesis                                             | 3   | 9    | 0.019587 | 3.15096855 |
| GO | cytoplasmic sequestering of transcription factor                       | 3   | 9    | 0.019587 | 3.15096855 |
| GO | oxidoreductase activity                                                | 40  | 418  | 0.019668 | 2.24030443 |
| GO | negative regulation of MAP kinase activity                             | 4   | 16   | 0.02037  | 2.88058782 |
| GO | positive regulation of endothelial cell migration                      | 4   | 16   | 0.02037  | 2.88058782 |
| GO | membrane depolarization                                                | 4   | 16   | 0.02037  | 2.88058782 |
| GO | SMAD protein signal transduction                                       | 4   | 16   | 0.02037  | 2.88058782 |
| GO | positive regulation of vasoconstriction                                | 4   | 16   | 0.02037  | 2.88058782 |
| GO | negative regulation of transcription, DNA-dependent                    | 12  | 91   | 0.020871 | 2.40697893 |
| GO | positive regulation of nitric oxide biosynthetic process               | 5   | 24   | 0.021128 | 2.71932149 |
| GO | response to insulin stimulus                                           | 8   | 51   | 0.021467 | 2.50831541 |
| GO | cell growth                                                            | 7   | 42   | 0.022535 | 2.52777829 |
| GO | heart development                                                      | 14  | 114  | 0.023447 | 2.31114214 |
| GO | skeletal system development                                            | 15  | 125  | 0.023501 | 2.29600632 |
| GO | response to peptide hormone stimulus                                   | 9   | 62   | 0.0243   | 2.40070986 |
| GO | positive regulation of transcription factor activity                   | 5   | 25   | 0.024964 | 2.61024504 |
| GO | brown fat cell differentiation                                         | 5   | 25   | 0.024964 | 2.61024504 |
| GO | activation of JUN kinase activity                                      | 5   | 25   | 0.024964 | 2.61024504 |
| GO | organ morphogenesis                                                    | 14  | 115  | 0.02508  | 2.27579921 |
| GO | positive regulation of calcium-mediated signaling                      | 4   | 17   | 0.025229 | 2.72893467 |
| GO | nitrogen compound metabolic process                                    | 4   | 17   | 0.025229 | 2.72893467 |
| GO | endoderm development                                                   | 4   | 17   | 0.025229 | 2.72893467 |

|    |                                                                       |   |    |          |            |
|----|-----------------------------------------------------------------------|---|----|----------|------------|
| GO | 1-acylglycerophosphocholine O-acyltransferase activity                | 2 | 4  | 0.025525 | 3.42142987 |
| GO | proton-transporting two-sector ATPase complex, proton-transporting    | 2 | 4  | 0.025525 | 3.42142987 |
| GO | positive regulation of fatty acid oxidation                           | 2 | 4  | 0.025525 | 3.42142987 |
| GO | MyD88-dependent toll-like receptor signaling pathway                  | 2 | 4  | 0.025525 | 3.42142987 |
| GO | alcohol dehydrogenase activity, zinc-dependent                        | 2 | 4  | 0.025525 | 3.42142987 |
| GO | glial cell migration                                                  | 2 | 4  | 0.025525 | 3.42142987 |
| GO | phospholipid translocation                                            | 2 | 4  | 0.025525 | 3.42142987 |
| GO | caffeine oxidase activity                                             | 2 | 4  | 0.025525 | 3.42142987 |
| GO | drug catabolic process                                                | 2 | 4  | 0.025525 | 3.42142987 |
| GO | Gram-positive bacterial cell surface binding                          | 2 | 4  | 0.025525 | 3.42142987 |
| GO | intercellular canaliculus                                             | 2 | 4  | 0.025525 | 3.42142987 |
| GO | behavioral response to ethanol                                        | 2 | 4  | 0.025525 | 3.42142987 |
| GO | cerebral cortex GABAergic interneuron migration                       | 2 | 4  | 0.025525 | 3.42142987 |
| GO | dopamine receptor activity                                            | 2 | 4  | 0.025525 | 3.42142987 |
| GO | cellular sodium ion homeostasis                                       | 2 | 4  | 0.025525 | 3.42142987 |
| GO | positive regulation of cardiac muscle hypertrophy                     | 2 | 4  | 0.025525 | 3.42142987 |
| GO | regulation of blood volume by renin-angiotensin                       | 2 | 4  | 0.025525 | 3.42142987 |
| GO | bioluminescence                                                       | 2 | 4  | 0.025525 | 3.42142987 |
| GO | hindgut morphogenesis                                                 | 2 | 4  | 0.025525 | 3.42142987 |
| GO | head morphogenesis                                                    | 2 | 4  | 0.025525 | 3.42142987 |
| GO | monocyte chemotaxis                                                   | 2 | 4  | 0.025525 | 3.42142987 |
| GO | negative regulation of collagen biosynthetic process                  | 2 | 4  | 0.025525 | 3.42142987 |
| GO | carbon dioxide transport                                              | 2 | 4  | 0.025525 | 3.42142987 |
| GO | cellular response to dexamethasone stimulus                           | 2 | 4  | 0.025525 | 3.42142987 |
| GO | plasma membrane organization                                          | 2 | 4  | 0.025525 | 3.42142987 |
| GO | fibril                                                                | 2 | 4  | 0.025525 | 3.42142987 |
| GO | negative regulation of myeloid cell differentiation                   | 2 | 4  | 0.025525 | 3.42142987 |
| GO | nucleotide-binding oligomerization domain containing 2 signaling patf | 2 | 4  | 0.025525 | 3.42142987 |
| GO | response to muramyl dipeptide                                         | 2 | 4  | 0.025525 | 3.42142987 |
| GO | peptide YY receptor activity                                          | 2 | 4  | 0.025525 | 3.42142987 |
| GO | regulation of Wnt receptor signaling pathway through beta-catenin     | 2 | 4  | 0.025525 | 3.42142987 |
| GO | negative regulation of appetite                                       | 2 | 4  | 0.025525 | 3.42142987 |
| GO | negative regulation of sequestering of triglyceride                   | 2 | 4  | 0.025525 | 3.42142987 |
| GO | negative regulation of membrane protein ectodomain proteolysis        | 2 | 4  | 0.025525 | 3.42142987 |
| GO | urinary bladder development                                           | 2 | 4  | 0.025525 | 3.42142987 |
| GO | peptide:hydrogen symporter activity                                   | 2 | 4  | 0.025525 | 3.42142987 |
| GO | cobalamin transport                                                   | 2 | 4  | 0.025525 | 3.42142987 |
| GO | positive regulation of nitric-oxide synthase biosynthetic process     | 2 | 4  | 0.025525 | 3.42142987 |
| GO | lipopolysaccharide receptor complex                                   | 2 | 4  | 0.025525 | 3.42142987 |
| GO | positive regulation of bone resorption                                | 2 | 4  | 0.025525 | 3.42142987 |
| GO | activation of MAPK activity                                           | 8 | 53 | 0.026522 | 2.38615188 |
| GO | dopamine metabolic process                                            | 3 | 10 | 0.026582 | 2.90367785 |
| GO | prostaglandin biosynthetic process                                    | 3 | 10 | 0.026582 | 2.90367785 |
| GO | fatty acid transport                                                  | 3 | 10 | 0.026582 | 2.90367785 |
| GO | R-SMAD binding                                                        | 3 | 10 | 0.026582 | 2.90367785 |
| GO | prostate gland epithelium morphogenesis                               | 3 | 10 | 0.026582 | 2.90367785 |
| GO | defense response to Gram-negative bacterium                           | 3 | 10 | 0.026582 | 2.90367785 |
| GO | phosphoinositide 3-kinase binding                                     | 3 | 10 | 0.026582 | 2.90367785 |
| GO | metalloendopeptidase inhibitor activity                               | 3 | 10 | 0.026582 | 2.90367785 |

|                                                                            |     |      |          |            |
|----------------------------------------------------------------------------|-----|------|----------|------------|
| GO response to virus                                                       | 13  | 105  | 0.026674 | 2.25832995 |
| GO peptidase activity                                                      | 43  | 465  | 0.026842 | 2.08724947 |
| GO sugar binding                                                           | 18  | 161  | 0.026865 | 2.19422191 |
| GO protein binding                                                         | 459 | 6249 | 0.027837 | 1.9517952  |
| GO brush border membrane                                                   | 5   | 26   | 0.02922  | 2.50646932 |
| GO endopeptidase inhibitor activity                                        | 5   | 26   | 0.02922  | 2.50646932 |
| GO neuropeptide signaling pathway                                          | 11  | 85   | 0.029718 | 2.23596124 |
| GO apoptosis                                                               | 41  | 444  | 0.030655 | 2.02736874 |
| GO platelet-derived growth factor receptor signaling pathway               | 4   | 18   | 0.030728 | 2.58824799 |
| GO protein ubiquitination involved in ubiquitin-dependent protein catabo   | 4   | 18   | 0.030728 | 2.58824799 |
| GO endocrine pancreas development                                          | 4   | 18   | 0.030728 | 2.58824799 |
| GO response to corticosterone stimulus                                     | 4   | 18   | 0.030728 | 2.58824799 |
| GO pituitary gland development                                             | 4   | 18   | 0.030728 | 2.58824799 |
| GO cellular process                                                        | 4   | 18   | 0.030728 | 2.58824799 |
| GO cortical cytoskeleton                                                   | 4   | 18   | 0.030728 | 2.58824799 |
| GO protein amino acid glycosylation                                        | 9   | 65   | 0.031965 | 2.24388376 |
| GO iron ion binding                                                        | 9   | 65   | 0.031965 | 2.24388376 |
| GO transforming growth factor beta receptor signaling pathway              | 8   | 55   | 0.032349 | 2.26934106 |
| GO transmembrane receptor activity                                         | 13  | 108  | 0.032664 | 2.14850996 |
| GO odontogenesis of dentine-containing tooth                               | 6   | 36   | 0.03361  | 2.33989753 |
| GO response to cold                                                        | 5   | 27   | 0.033907 | 2.40751839 |
| GO retinol dehydrogenase activity                                          | 3   | 11   | 0.034729 | 2.68693381 |
| GO negative regulation of osteoclast differentiation                       | 3   | 11   | 0.034729 | 2.68693381 |
| GO sphingolipid biosynthetic process                                       | 3   | 11   | 0.034729 | 2.68693381 |
| GO transforming growth factor beta receptor activity                       | 3   | 11   | 0.034729 | 2.68693381 |
| GO positive regulation of cellular protein metabolic process               | 3   | 11   | 0.034729 | 2.68693381 |
| GO arachidonic acid secretion                                              | 3   | 11   | 0.034729 | 2.68693381 |
| GO peptide hormone processing                                              | 3   | 11   | 0.034729 | 2.68693381 |
| GO positive regulation of interleukin-1 beta secretion                     | 3   | 11   | 0.034729 | 2.68693381 |
| GO basal lamina                                                            | 3   | 11   | 0.034729 | 2.68693381 |
| GO I-kappaB phosphorylation                                                | 3   | 11   | 0.034729 | 2.68693381 |
| GO cellular response to insulin stimulus                                   | 7   | 46   | 0.035363 | 2.25569969 |
| GO external side of plasma membrane                                        | 14  | 121  | 0.036698 | 2.07080173 |
| GO neutrophil chemotaxis                                                   | 4   | 19   | 0.036875 | 2.45711416 |
| GO positive regulation of MAP kinase activity                              | 4   | 19   | 0.036875 | 2.45711416 |
| GO positive regulation of JNK cascade                                      | 4   | 19   | 0.036875 | 2.45711416 |
| GO serine-type endopeptidase activity                                      | 16  | 144  | 0.037188 | 2.04126778 |
| GO integrin complex                                                        | 5   | 28   | 0.039033 | 2.31297528 |
| GO lung morphogenesis                                                      | 2   | 5    | 0.040629 | 2.93915777 |
| GO activation of MAPKKK activity                                           | 2   | 5    | 0.040629 | 2.93915777 |
| GO branching involved in mammary gland duct morphogenesis                  | 2   | 5    | 0.040629 | 2.93915777 |
| GO positive regulation of sodium ion transport                             | 2   | 5    | 0.040629 | 2.93915777 |
| GO monoterpenoid metabolic process                                         | 2   | 5    | 0.040629 | 2.93915777 |
| GO serine C-palmitoyltransferase activity                                  | 2   | 5    | 0.040629 | 2.93915777 |
| GO serine C-palmitoyltransferase complex                                   | 2   | 5    | 0.040629 | 2.93915777 |
| GO pattern recognition receptor activity                                   | 2   | 5    | 0.040629 | 2.93915777 |
| GO inhibition of adenylate cyclase activity by dopamine receptor signaling | 2   | 5    | 0.040629 | 2.93915777 |
| GO nerve-nerve synaptic transmission                                       | 2   | 5    | 0.040629 | 2.93915777 |
| GO fear response                                                           | 2   | 5    | 0.040629 | 2.93915777 |

|                                                                           |    |      |          |            |
|---------------------------------------------------------------------------|----|------|----------|------------|
| GO protein tyrosine/threonine phosphatase activity                        | 2  | 5    | 0.040629 | 2.93915777 |
| GO mitogen-activated protein kinase binding                               | 2  | 5    | 0.040629 | 2.93915777 |
| GO microfibril                                                            | 2  | 5    | 0.040629 | 2.93915777 |
| GO paraxial mesoderm formation                                            | 2  | 5    | 0.040629 | 2.93915777 |
| GO neutrophil mediated immunity                                           | 2  | 5    | 0.040629 | 2.93915777 |
| GO positive regulation of immunoglobulin secretion                        | 2  | 5    | 0.040629 | 2.93915777 |
| GO negative regulation of transporter activity                            | 2  | 5    | 0.040629 | 2.93915777 |
| GO negative regulation of focal adhesion assembly                         | 2  | 5    | 0.040629 | 2.93915777 |
| GO response to cholesterol                                                | 2  | 5    | 0.040629 | 2.93915777 |
| GO amine oxidase activity                                                 | 2  | 5    | 0.040629 | 2.93915777 |
| GO regulation of cardiac muscle contraction                               | 2  | 5    | 0.040629 | 2.93915777 |
| GO entrainment of circadian clock                                         | 2  | 5    | 0.040629 | 2.93915777 |
| GO prostaglandin E receptor activity                                      | 2  | 5    | 0.040629 | 2.93915777 |
| GO negative regulation of growth of symbiont in host                      | 2  | 5    | 0.040629 | 2.93915777 |
| GO cell-matrix adhesion                                                   | 9  | 68   | 0.041163 | 2.09528969 |
| GO protein homodimerization activity                                      | 34 | 365  | 0.041173 | 1.89607134 |
| GO negative regulation of cell migration                                  | 6  | 38   | 0.042479 | 2.18964653 |
| GO response to mechanical stimulus                                        | 6  | 38   | 0.042479 | 2.18964653 |
| GO transcription factor binding                                           | 18 | 170  | 0.042732 | 1.94806018 |
| GO cytokine-mediated signaling pathway                                    | 7  | 48   | 0.043287 | 2.13003653 |
| GO retina development in camera-type eye                                  | 4  | 20   | 0.043678 | 2.33436646 |
| GO tumor necrosis factor receptor binding                                 | 4  | 20   | 0.043678 | 2.33436646 |
| GO drug metabolic process                                                 | 3  | 12   | 0.044007 | 2.49439933 |
| GO photoreceptor inner segment                                            | 3  | 12   | 0.044007 | 2.49439933 |
| GO response to pH                                                         | 3  | 12   | 0.044007 | 2.49439933 |
| GO negative regulation of macrophage derived foam cell differentiation    | 3  | 12   | 0.044007 | 2.49439933 |
| GO positive regulation of interferon-beta production                      | 3  | 12   | 0.044007 | 2.49439933 |
| GO metanephros development                                                | 5  | 29   | 0.044606 | 2.22247287 |
| GO protein targeting                                                      | 5  | 29   | 0.044606 | 2.22247287 |
| GO in utero embryonic development                                         | 15 | 136  | 0.045041 | 1.94544286 |
| GO Golgi membrane                                                         | 32 | 343  | 0.045655 | 1.84760542 |
| GO transport vesicle                                                      | 6  | 39   | 0.047414 | 2.11803392 |
| GO calcium ion transport                                                  | 13 | 114  | 0.047442 | 1.93887619 |
| GO receptor activity                                                      | 93 | 1148 | 0.047686 | 1.75396703 |
| GO elevation of cytosolic calcium ion concentration                       | 11 | 92   | 0.048847 | 1.95146746 |
| GO brain development                                                      | 13 | 115  | 0.050292 | 1.90514552 |
| GO negative regulation of gene-specific transcription from RNA polymerase | 8  | 60   | 0.050569 | 1.99790727 |
| GO adult locomotory behavior                                              | 5  | 30   | 0.050631 | 2.13568644 |
| GO dorsal/ventral pattern formation                                       | 5  | 30   | 0.050631 | 2.13568644 |
| GO positive regulation of inflammatory response                           | 4  | 21   | 0.051135 | 2.21903192 |
| GO ventricular cardiac muscle tissue morphogenesis                        | 4  | 21   | 0.051135 | 2.21903192 |
| GO negative regulation of gene-specific transcription                     | 4  | 21   | 0.051135 | 2.21903192 |
| GO proteolysis                                                            | 38 | 423  | 0.051314 | 1.77101609 |
| GO response to hydrogen peroxide                                          | 6  | 40   | 0.05269  | 2.04857614 |
| GO negative regulation of smooth muscle cell proliferation                | 3  | 13   | 0.05438  | 2.32145913 |
| GO hormone metabolic process                                              | 3  | 13   | 0.05438  | 2.32145913 |
| GO MAP kinase tyrosine/serine/threonine phosphatase activity              | 3  | 13   | 0.05438  | 2.32145913 |
| GO regulation of inflammatory response                                    | 3  | 13   | 0.05438  | 2.32145913 |
| GO negative regulation of Wnt receptor signaling pathway through beta-c   | 3  | 13   | 0.05438  | 2.32145913 |



|                                                                             |    |    |          |            |
|-----------------------------------------------------------------------------|----|----|----------|------------|
| GO embryonic cranial skeleton morphogenesis                                 | 3  | 13 | 0.05438  | 2.32145913 |
| GO inorganic anion exchanger activity                                       | 3  | 13 | 0.05438  | 2.32145913 |
| GO activation of NF-kappaB-inducing kinase activity                         | 3  | 13 | 0.05438  | 2.32145913 |
| GO intracellular protein kinase cascade                                     | 11 | 94 | 0.055565 | 1.8746873  |
| GO embryonic development                                                    | 9  | 72 | 0.055986 | 1.90854926 |
| GO positive regulation of MAPKKK cascade                                    | 5  | 31 | 0.057108 | 2.05232749 |
| GO heart morphogenesis                                                      | 5  | 31 | 0.057108 | 2.05232749 |
| GO negative regulation of Ras protein signal transduction                   | 2  | 6  | 0.058221 | 2.57255176 |
| GO prostate epithelial cord arborization involved in prostate glandular aci | 2  | 6  | 0.058221 | 2.57255176 |
| GO negative regulation of interleukin-12 production                         | 2  | 6  | 0.058221 | 2.57255176 |
| GO response to amine stimulus                                               | 2  | 6  | 0.058221 | 2.57255176 |
| GO negative regulation of protein secretion                                 | 2  | 6  | 0.058221 | 2.57255176 |
| GO peristalsis                                                              | 2  | 6  | 0.058221 | 2.57255176 |
| GO regulation of synaptic transmission, GABAergic                           | 2  | 6  | 0.058221 | 2.57255176 |
| GO regulation of dopamine metabolic process                                 | 2  | 6  | 0.058221 | 2.57255176 |
| GO positive regulation of fatty acid biosynthetic process                   | 2  | 6  | 0.058221 | 2.57255176 |
| GO inositol phosphate-mediated signaling                                    | 2  | 6  | 0.058221 | 2.57255176 |
| GO mitochondrial membrane organization                                      | 2  | 6  | 0.058221 | 2.57255176 |
| GO positive regulation of mast cell degranulation                           | 2  | 6  | 0.058221 | 2.57255176 |
| GO leukotriene metabolic process                                            | 2  | 6  | 0.058221 | 2.57255176 |
| GO lipoxygenase activity                                                    | 2  | 6  | 0.058221 | 2.57255176 |
| GO glycosaminoglycan catabolic process                                      | 2  | 6  | 0.058221 | 2.57255176 |
| GO heparan sulfate proteoglycan biosynthetic process                        | 2  | 6  | 0.058221 | 2.57255176 |
| GO neuron fate specification                                                | 2  | 6  | 0.058221 | 2.57255176 |
| GO exocrine pancreas development                                            | 2  | 6  | 0.058221 | 2.57255176 |
| GO positive regulation of myoblast differentiation                          | 2  | 6  | 0.058221 | 2.57255176 |
| GO interleukin-6 receptor binding                                           | 2  | 6  | 0.058221 | 2.57255176 |
| GO positive regulation of acute inflammatory response                       | 2  | 6  | 0.058221 | 2.57255176 |
| GO water transmembrane transporter activity                                 | 2  | 6  | 0.058221 | 2.57255176 |
| GO SMAD protein nuclear translocation                                       | 2  | 6  | 0.058221 | 2.57255176 |
| GO somatic stem cell division                                               | 2  | 6  | 0.058221 | 2.57255176 |
| GO negative regulation of erythrocyte differentiation                       | 2  | 6  | 0.058221 | 2.57255176 |
| GO maintenance of gastrointestinal epithelium                               | 2  | 6  | 0.058221 | 2.57255176 |
| GO dopamine biosynthetic process                                            | 2  | 6  | 0.058221 | 2.57255176 |
| GO negative regulation of cholesterol storage                               | 2  | 6  | 0.058221 | 2.57255176 |
| GO protein thiol-disulfide exchange                                         | 2  | 6  | 0.058221 | 2.57255176 |
| GO regulation of branching involved in prostate gland morphogenesis         | 2  | 6  | 0.058221 | 2.57255176 |
| GO branching involved in embryonic placenta morphogenesis                   | 2  | 6  | 0.058221 | 2.57255176 |
| GO cobalt ion transport                                                     | 2  | 6  | 0.058221 | 2.57255176 |
| GO Rho GTPase activator activity                                            | 4  | 22 | 0.059242 | 2.11029161 |
| GO gluconeogenesis                                                          | 4  | 22 | 0.059242 | 2.11029161 |
| GO negative regulation of NF-kappaB transcription factor activity           | 4  | 22 | 0.059242 | 2.11029161 |
| GO cysteine-type endopeptidase inhibitor activity                           | 4  | 22 | 0.059242 | 2.11029161 |
| GO blood vessel remodeling                                                  | 4  | 22 | 0.059242 | 2.11029161 |
| GO activation of phospholipase C activity                                   | 4  | 22 | 0.059242 | 2.11029161 |
| GO basal plasma membrane                                                    | 4  | 22 | 0.059242 | 2.11029161 |
| GO voltage-gated calcium channel complex                                    | 4  | 22 | 0.059242 | 2.11029161 |
| GO positive regulation of cell migration                                    | 8  | 62 | 0.059401 | 1.89661467 |
| GO extracellular matrix organization                                        | 8  | 62 | 0.059401 | 1.89661467 |

|    |                                                                         |    |     |          |            |
|----|-------------------------------------------------------------------------|----|-----|----------|------------|
| GO | G-protein coupled receptor activity                                     | 32 | 352 | 0.060733 | 1.69312561 |
| GO | anti-apoptosis                                                          | 18 | 178 | 0.061715 | 1.74101138 |
| GO | positive regulation of anti-apoptosis                                   | 5  | 32  | 0.064037 | 1.97213867 |
| GO | spermatid development                                                   | 5  | 32  | 0.064037 | 1.97213867 |
| GO | apical part of cell                                                     | 6  | 42  | 0.06427  | 1.91563311 |
| GO | cytokine activity                                                       | 15 | 143 | 0.06445  | 1.73843571 |
| GO | transcription repressor binding                                         | 3  | 14  | 0.065804 | 2.16465914 |
| GO | response to starvation                                                  | 3  | 14  | 0.065804 | 2.16465914 |
| GO | regulation of sensory perception of pain                                | 3  | 14  | 0.065804 | 2.16465914 |
| GO | regulation of vasoconstriction                                          | 3  | 14  | 0.065804 | 2.16465914 |
| GO | regulation of neuronal synaptic plasticity                              | 3  | 14  | 0.065804 | 2.16465914 |
| GO | positive regulation of protein secretion                                | 3  | 14  | 0.065804 | 2.16465914 |
| GO | artery morphogenesis                                                    | 3  | 14  | 0.065804 | 2.16465914 |
| GO | eye development                                                         | 3  | 14  | 0.065804 | 2.16465914 |
| GO | negative regulation of mitotic cell cycle                               | 3  | 14  | 0.065804 | 2.16465914 |
| GO | sialyltransferase activity                                              | 3  | 14  | 0.065804 | 2.16465914 |
| GO | DNA damage response, signal transduction by p53 class mediator resu     | 3  | 14  | 0.065804 | 2.16465914 |
| GO | response to ATP                                                         | 3  | 14  | 0.065804 | 2.16465914 |
| GO | proteasome core complex                                                 | 3  | 14  | 0.065804 | 2.16465914 |
| GO | guanyl-nucleotide exchange factor activity                              | 13 | 120 | 0.066302 | 1.74126282 |
| GO | galactosyltransferase activity                                          | 4  | 23  | 0.067988 | 2.00745043 |
| GO | activation of MAPKK activity                                            | 4  | 23  | 0.067988 | 2.00745043 |
| GO | voltage-gated calcium channel activity                                  | 4  | 23  | 0.067988 | 2.00745043 |
| GO | negative regulation of cell migration involved in sprouting angiogenesi | 1  | 1   | 0.068348 | 3.69201445 |
| GO | 3-alpha(17-beta)-hydroxysteroid dehydrogenase (NAD+) activity           | 1  | 1   | 0.068348 | 3.69201445 |
| GO | racemase and epimerase activity                                         | 1  | 1   | 0.068348 | 3.69201445 |
| GO | lung growth                                                             | 1  | 1   | 0.068348 | 3.69201445 |
| GO | ATP-binding and phosphorylation-dependent chloride channel activity     | 1  | 1   | 0.068348 | 3.69201445 |
| GO | channel-conductance-controlling ATPase activity                         | 1  | 1   | 0.068348 | 3.69201445 |
| GO | actin modification                                                      | 1  | 1   | 0.068348 | 3.69201445 |
| GO | myosin II binding                                                       | 1  | 1   | 0.068348 | 3.69201445 |
| GO | regulation of synapse organization                                      | 1  | 1   | 0.068348 | 3.69201445 |
| GO | negative regulation of innate immune response                           | 1  | 1   | 0.068348 | 3.69201445 |
| GO | negative regulation of macrophage cytokine production                   | 1  | 1   | 0.068348 | 3.69201445 |
| GO | positive regulation of macrophage tolerance induction                   | 1  | 1   | 0.068348 | 3.69201445 |
| GO | regulation of protein complex disassembly                               | 1  | 1   | 0.068348 | 3.69201445 |
| GO | acyl carnitine transport                                                | 1  | 1   | 0.068348 | 3.69201445 |
| GO | sphinganine metabolic process                                           | 1  | 1   | 0.068348 | 3.69201445 |
| GO | sphingolipid delta-4 desaturase activity                                | 1  | 1   | 0.068348 | 3.69201445 |
| GO | sphingosine hydroxylase activity                                        | 1  | 1   | 0.068348 | 3.69201445 |
| GO | neuronal RNA granule                                                    | 1  | 1   | 0.068348 | 3.69201445 |
| GO | collagen type VIII                                                      | 1  | 1   | 0.068348 | 3.69201445 |
| GO | carbamoyl phosphate biosynthetic process                                | 1  | 1   | 0.068348 | 3.69201445 |
| GO | carbamoyl-phosphate synthase (ammonia) activity                         | 1  | 1   | 0.068348 | 3.69201445 |
| GO | carbamoyl-phosphate synthase activity                                   | 1  | 1   | 0.068348 | 3.69201445 |
| GO | citrulline biosynthetic process                                         | 1  | 1   | 0.068348 | 3.69201445 |
| GO | nitric oxide metabolic process                                          | 1  | 1   | 0.068348 | 3.69201445 |
| GO | mammary gland fat development                                           | 1  | 1   | 0.068348 | 3.69201445 |
| GO | positive regulation of mononuclear cell proliferation                   | 1  | 1   | 0.068348 | 3.69201445 |

|    |                                                                        |   |   |          |            |
|----|------------------------------------------------------------------------|---|---|----------|------------|
| GO | regulation of macrophage derived foam cell differentiation             | 1 | 1 | 0.068348 | 3.69201445 |
| GO | reproductive developmental process                                     | 1 | 1 | 0.068348 | 3.69201445 |
| GO | negative regulation of blood vessel remodeling                         | 1 | 1 | 0.068348 | 3.69201445 |
| GO | negative regulation of collagen catabolic process                      | 1 | 1 | 0.068348 | 3.69201445 |
| GO | negative regulation of elastin catabolic process                       | 1 | 1 | 0.068348 | 3.69201445 |
| GO | negative regulation of histolysis                                      | 1 | 1 | 0.068348 | 3.69201445 |
| GO | regulation of tissue remodeling                                        | 1 | 1 | 0.068348 | 3.69201445 |
| GO | beta2-adrenergic receptor activity                                     | 1 | 1 | 0.068348 | 3.69201445 |
| GO | cellular amide metabolic process                                       | 1 | 1 | 0.068348 | 3.69201445 |
| GO | urea metabolic process                                                 | 1 | 1 | 0.068348 | 3.69201445 |
| GO | regulation of endothelial cell migration                               | 1 | 1 | 0.068348 | 3.69201445 |
| GO | induction of bacterial agglutination                                   | 1 | 1 | 0.068348 | 3.69201445 |
| GO | zymogen binding                                                        | 1 | 1 | 0.068348 | 3.69201445 |
| GO | establishment of localization                                          | 1 | 1 | 0.068348 | 3.69201445 |
| GO | invadopodium membrane                                                  | 1 | 1 | 0.068348 | 3.69201445 |
| GO | regulation of T cell mediated immunity                                 | 1 | 1 | 0.068348 | 3.69201445 |
| GO | dopamine D2 receptor activity                                          | 1 | 1 | 0.068348 | 3.69201445 |
| GO | dopamine D4 receptor activity                                          | 1 | 1 | 0.068348 | 3.69201445 |
| GO | toxin receptor binding                                                 | 1 | 1 | 0.068348 | 3.69201445 |
| GO | angiotensin mediated vasoconstriction involved in regulation of syster | 1 | 1 | 0.068348 | 3.69201445 |
| GO | renal response to blood flow involved in circulatory renin-angiotensin | 1 | 1 | 0.068348 | 3.69201445 |
| GO | response to muscle activity involved in regulation of muscle adaptatio | 1 | 1 | 0.068348 | 3.69201445 |
| GO | type 2 angiotensin receptor binding                                    | 1 | 1 | 0.068348 | 3.69201445 |
| GO | negative regulation of elastin biosynthetic process                    | 1 | 1 | 0.068348 | 3.69201445 |
| GO | activation of phospholipase D activity by G-protein coupled receptor p | 1 | 1 | 0.068348 | 3.69201445 |
| GO | endothelin A receptor binding                                          | 1 | 1 | 0.068348 | 3.69201445 |
| GO | negative regulation of nitric-oxide synthase biosynthetic process      | 1 | 1 | 0.068348 | 3.69201445 |
| GO | protein kinase C deactivation                                          | 1 | 1 | 0.068348 | 3.69201445 |
| GO | O-glycan processing, core 3                                            | 1 | 1 | 0.068348 | 3.69201445 |
| GO | rhombomere 3 formation                                                 | 1 | 1 | 0.068348 | 3.69201445 |
| GO | rhombomere 5 formation                                                 | 1 | 1 | 0.068348 | 3.69201445 |
| GO | axial mesoderm formation                                               | 1 | 1 | 0.068348 | 3.69201445 |
| GO | notochord cell development                                             | 1 | 1 | 0.068348 | 3.69201445 |
| GO | negative regulation of cellular metabolic process                      | 1 | 1 | 0.068348 | 3.69201445 |
| GO | positive regulation of cellular metabolic process                      | 1 | 1 | 0.068348 | 3.69201445 |
| GO | regulation of angiotensin metabolic process                            | 1 | 1 | 0.068348 | 3.69201445 |
| GO | synapse maturation                                                     | 1 | 1 | 0.068348 | 3.69201445 |
| GO | hemopoietic stem cell proliferation                                    | 1 | 1 | 0.068348 | 3.69201445 |
| GO | positive regulation of type I hypersensitivity                         | 1 | 1 | 0.068348 | 3.69201445 |
| GO | pancreatic D cell differentiation                                      | 1 | 1 | 0.068348 | 3.69201445 |
| GO | pancreatic E cell differentiation                                      | 1 | 1 | 0.068348 | 3.69201445 |
| GO | cytoskeleton-dependent intracellular transport                         | 1 | 1 | 0.068348 | 3.69201445 |
| GO | latrotoxin receptor activity                                           | 1 | 1 | 0.068348 | 3.69201445 |
| GO | low-density lipoprotein receptor catabolic process                     | 1 | 1 | 0.068348 | 3.69201445 |
| GO | glutamate catabolic process                                            | 1 | 1 | 0.068348 | 3.69201445 |
| GO | protein-pyridoxal-5-phosphate linkage                                  | 1 | 1 | 0.068348 | 3.69201445 |
| GO | exocrine system development                                            | 1 | 1 | 0.068348 | 3.69201445 |
| GO | intrinsic to plasma membrane                                           | 1 | 1 | 0.068348 | 3.69201445 |
| GO | racemase and epimerase activity, acting on carbohydrates and derivat   | 1 | 1 | 0.068348 | 3.69201445 |

|    |                                                                       |   |   |          |            |
|----|-----------------------------------------------------------------------|---|---|----------|------------|
| GO | UDP-glucuronate 5'-epimerase activity                                 | 1 | 1 | 0.068348 | 3.69201445 |
| GO | vitamin transporter activity                                          | 1 | 1 | 0.068348 | 3.69201445 |
| GO | vitamin transport                                                     | 1 | 1 | 0.068348 | 3.69201445 |
| GO | FADH2 metabolic process                                               | 1 | 1 | 0.068348 | 3.69201445 |
| GO | intracellular pH elevation                                            | 1 | 1 | 0.068348 | 3.69201445 |
| GO | (alpha-N-acetylneuraminyl-2,3-beta-galactosyl-1,3)-N-acetyl-galactosa | 1 | 1 | 0.068348 | 3.69201445 |
| GO | anterior semicircular canal development                               | 1 | 1 | 0.068348 | 3.69201445 |
| GO | lateral semicircular canal development                                | 1 | 1 | 0.068348 | 3.69201445 |
| GO | pallium development                                                   | 1 | 1 | 0.068348 | 3.69201445 |
| GO | ferritin receptor activity                                            | 1 | 1 | 0.068348 | 3.69201445 |
| GO | iron ion transmembrane transport                                      | 1 | 1 | 0.068348 | 3.69201445 |
| GO | negative regulation of interleukin-10 biosynthetic process            | 1 | 1 | 0.068348 | 3.69201445 |
| GO | histidine ammonia-lyase activity                                      | 1 | 1 | 0.068348 | 3.69201445 |
| GO | radial spoke                                                          | 1 | 1 | 0.068348 | 3.69201445 |
| GO | glycolate metabolic process                                           | 1 | 1 | 0.068348 | 3.69201445 |
| GO | muscle hypertrophy                                                    | 1 | 1 | 0.068348 | 3.69201445 |
| GO | myotube cell development                                              | 1 | 1 | 0.068348 | 3.69201445 |
| GO | satellite cell maintenance involved in skeletal muscle regeneration   | 1 | 1 | 0.068348 | 3.69201445 |
| GO | intussusceptive angiogenesis                                          | 1 | 1 | 0.068348 | 3.69201445 |
| GO | butyryl-CoA dehydrogenase activity                                    | 1 | 1 | 0.068348 | 3.69201445 |
| GO | glucagon secretion                                                    | 1 | 1 | 0.068348 | 3.69201445 |
| GO | positive regulation of B cell activation                              | 1 | 1 | 0.068348 | 3.69201445 |
| GO | ciliary neurotrophic factor binding                                   | 1 | 1 | 0.068348 | 3.69201445 |
| GO | positive regulation of activation of Janus kinase activity            | 1 | 1 | 0.068348 | 3.69201445 |
| GO | carbon dioxide transmembrane transporter activity                     | 1 | 1 | 0.068348 | 3.69201445 |
| GO | carbon dioxide transmembrane transport                                | 1 | 1 | 0.068348 | 3.69201445 |
| GO | cellular hyperosmotic response                                        | 1 | 1 | 0.068348 | 3.69201445 |
| GO | cellular response to inorganic substance                              | 1 | 1 | 0.068348 | 3.69201445 |
| GO | cellular response to mechanical stimulus                              | 1 | 1 | 0.068348 | 3.69201445 |
| GO | cellular response to nitric oxide                                     | 1 | 1 | 0.068348 | 3.69201445 |
| GO | cellular response to salt stress                                      | 1 | 1 | 0.068348 | 3.69201445 |
| GO | establishment or maintenance of actin cytoskeleton polarity           | 1 | 1 | 0.068348 | 3.69201445 |
| GO | maintenance of symbiont-containing vacuole via substance secreted b   | 1 | 1 | 0.068348 | 3.69201445 |
| GO | nitric oxide transmembrane transporter activity                       | 1 | 1 | 0.068348 | 3.69201445 |
| GO | symbiont-containing vacuole membrane                                  | 1 | 1 | 0.068348 | 3.69201445 |
| GO | transepithelial water transport                                       | 1 | 1 | 0.068348 | 3.69201445 |
| GO | insulin receptor activity                                             | 1 | 1 | 0.068348 | 3.69201445 |
| GO | positive regulation of developmental growth                           | 1 | 1 | 0.068348 | 3.69201445 |
| GO | transformation of host cell by virus                                  | 1 | 1 | 0.068348 | 3.69201445 |
| GO | leading edge cell differentiation                                     | 1 | 1 | 0.068348 | 3.69201445 |
| GO | regulation of synaptic growth at neuromuscular junction               | 1 | 1 | 0.068348 | 3.69201445 |
| GO | stem cell factor receptor activity                                    | 1 | 1 | 0.068348 | 3.69201445 |
| GO | GMP binding                                                           | 1 | 1 | 0.068348 | 3.69201445 |
| GO | laminin-5 complex                                                     | 1 | 1 | 0.068348 | 3.69201445 |
| GO | morphogenesis of a polarized epithelium                               | 1 | 1 | 0.068348 | 3.69201445 |
| GO | axon extension involved in regeneration                               | 1 | 1 | 0.068348 | 3.69201445 |
| GO | positive regulation of phospholipase activity                         | 1 | 1 | 0.068348 | 3.69201445 |
| GO | cellular response to vitamin A                                        | 1 | 1 | 0.068348 | 3.69201445 |
| GO | steryl-sulfatase activity                                             | 1 | 1 | 0.068348 | 3.69201445 |

|    |                                                                            |   |   |          |            |
|----|----------------------------------------------------------------------------|---|---|----------|------------|
| GO | mannosidase activity                                                       | 1 | 1 | 0.068348 | 3.69201445 |
| GO | protein channel activity                                                   | 1 | 1 | 0.068348 | 3.69201445 |
| GO | inner acrosomal membrane                                                   | 1 | 1 | 0.068348 | 3.69201445 |
| GO | G0 to G1 transition                                                        | 1 | 1 | 0.068348 | 3.69201445 |
| GO | double-stranded methylated DNA binding                                     | 1 | 1 | 0.068348 | 3.69201445 |
| GO | positive regulation of myeloid leukocyte differentiation                   | 1 | 1 | 0.068348 | 3.69201445 |
| GO | cellular response to magnetism                                             | 1 | 1 | 0.068348 | 3.69201445 |
| GO | lung epithelial cell differentiation                                       | 1 | 1 | 0.068348 | 3.69201445 |
| GO | neuroblast fate determination                                              | 1 | 1 | 0.068348 | 3.69201445 |
| GO | noradrenergic neuron fate commitment                                       | 1 | 1 | 0.068348 | 3.69201445 |
| GO | oligodendrocyte cell fate commitment                                       | 1 | 1 | 0.068348 | 3.69201445 |
| GO | regulation of timing of subpallium neuron differentiation                  | 1 | 1 | 0.068348 | 3.69201445 |
| GO | response to epidermal growth factor stimulus                               | 1 | 1 | 0.068348 | 3.69201445 |
| GO | methylenetetrahydrofolate reductase (NADPH) activity                       | 1 | 1 | 0.068348 | 3.69201445 |
| GO | nitrilase activity                                                         | 1 | 1 | 0.068348 | 3.69201445 |
| GO | aortic valve morphogenesis                                                 | 1 | 1 | 0.068348 | 3.69201445 |
| GO | endocardium morphogenesis                                                  | 1 | 1 | 0.068348 | 3.69201445 |
| GO | foregut morphogenesis                                                      | 1 | 1 | 0.068348 | 3.69201445 |
| GO | regulation of epithelial cell proliferation involved in prostate gland dev | 1 | 1 | 0.068348 | 3.69201445 |
| GO | regulation of somitogenesis                                                | 1 | 1 | 0.068348 | 3.69201445 |
| GO | generation of ovulation cycle rhythm                                       | 1 | 1 | 0.068348 | 3.69201445 |
| GO | 2'-5'-oligoadenylate synthetase activity                                   | 1 | 1 | 0.068348 | 3.69201445 |
| GO | relaxation of cardiac muscle                                               | 1 | 1 | 0.068348 | 3.69201445 |
| GO | protein amino acid hydroxylation                                           | 1 | 1 | 0.068348 | 3.69201445 |
| GO | tetrahydrobiopterin metabolic process                                      | 1 | 1 | 0.068348 | 3.69201445 |
| GO | tyrosine biosynthetic process                                              | 1 | 1 | 0.068348 | 3.69201445 |
| GO | interleukin-20 receptor binding                                            | 1 | 1 | 0.068348 | 3.69201445 |
| GO | positive regulation of epidermal cell differentiation                      | 1 | 1 | 0.068348 | 3.69201445 |
| GO | peptidylamidoglycolate lyase activity                                      | 1 | 1 | 0.068348 | 3.69201445 |
| GO | peptidylglycine monooxygenase activity                                     | 1 | 1 | 0.068348 | 3.69201445 |
| GO | carbohydrate response element binding                                      | 1 | 1 | 0.068348 | 3.69201445 |
| GO | glucose mediated signaling pathway                                         | 1 | 1 | 0.068348 | 3.69201445 |
| GO | negative regulation of oxidative phosphorylation                           | 1 | 1 | 0.068348 | 3.69201445 |
| GO | spot adherens junction                                                     | 1 | 1 | 0.068348 | 3.69201445 |
| GO | 1-phosphatidylinositol-4-phosphate 3-kinase, class IA complex              | 1 | 1 | 0.068348 | 3.69201445 |
| GO | branchiomic skeletal muscle development                                    | 1 | 1 | 0.068348 | 3.69201445 |
| GO | hydroxylysine biosynthetic process                                         | 1 | 1 | 0.068348 | 3.69201445 |
| GO | granule cell precursor tangential migration                                | 1 | 1 | 0.068348 | 3.69201445 |
| GO | melanin-concentrating hormone activity                                     | 1 | 1 | 0.068348 | 3.69201445 |
| GO | type 1 melanin-concentrating hormone receptor binding                      | 1 | 1 | 0.068348 | 3.69201445 |
| GO | negative regulation of translation in response to oxidative stress         | 1 | 1 | 0.068348 | 3.69201445 |
| GO | negative regulation of calcium-dependent cell-cell adhesion                | 1 | 1 | 0.068348 | 3.69201445 |
| GO | lactosylceramide 4-alpha-galactosyltransferase activity                    | 1 | 1 | 0.068348 | 3.69201445 |
| GO | thyroid stimulating hormone secreting cell differentiation                 | 1 | 1 | 0.068348 | 3.69201445 |
| GO | cell fate commitment involved in the formation of primary germ layer:      | 1 | 1 | 0.068348 | 3.69201445 |
| GO | positive regulation of catenin protein nuclear translocation               | 1 | 1 | 0.068348 | 3.69201445 |
| GO | regulation of canonical Wnt receptor signaling pathway involved in he      | 1 | 1 | 0.068348 | 3.69201445 |
| GO | regulation of methylation-dependent chromatin silencing                    | 1 | 1 | 0.068348 | 3.69201445 |
| GO | RNA 5'-end processing                                                      | 1 | 1 | 0.068348 | 3.69201445 |

|                                                                            |   |   |          |            |
|----------------------------------------------------------------------------|---|---|----------|------------|
| GO sphingoid biosynthetic process                                          | 1 | 1 | 0.068348 | 3.69201445 |
| GO alpha-N-acetylgalactosaminide alpha-2,6-sialyltransferase activity      | 1 | 1 | 0.068348 | 3.69201445 |
| GO barrier septum formation                                                | 1 | 1 | 0.068348 | 3.69201445 |
| GO unidimensional cell growth                                              | 1 | 1 | 0.068348 | 3.69201445 |
| GO inorganic diphosphate transmembrane transporter activity                | 1 | 1 | 0.068348 | 3.69201445 |
| GO asymmetric cell division                                                | 1 | 1 | 0.068348 | 3.69201445 |
| GO negative regulation of complement activation                            | 1 | 1 | 0.068348 | 3.69201445 |
| GO glycoprotein-N-acetylgalactosamine 3-beta-galactosyltransferase activ   | 1 | 1 | 0.068348 | 3.69201445 |
| GO neuromedin U binding                                                    | 1 | 1 | 0.068348 | 3.69201445 |
| GO columnar/cuboidal epithelial cell development                           | 1 | 1 | 0.068348 | 3.69201445 |
| GO negative regulation of calcium ion transport via store-operated calciur | 1 | 1 | 0.068348 | 3.69201445 |
| GO flavin-linked sulfhydryl oxidase activity                               | 1 | 1 | 0.068348 | 3.69201445 |
| GO regulation of mast cell activation                                      | 1 | 1 | 0.068348 | 3.69201445 |
| GO cytotoxic T cell degranulation                                          | 1 | 1 | 0.068348 | 3.69201445 |
| GO retinol transporter activity                                            | 1 | 1 | 0.068348 | 3.69201445 |
| GO retinol transport                                                       | 1 | 1 | 0.068348 | 3.69201445 |
| GO spermatogonial cell division                                            | 1 | 1 | 0.068348 | 3.69201445 |
| GO response to cGMP                                                        | 1 | 1 | 0.068348 | 3.69201445 |
| GO regulation of germinal center formation                                 | 1 | 1 | 0.068348 | 3.69201445 |
| GO regulation of memory T cell differentiation                             | 1 | 1 | 0.068348 | 3.69201445 |
| GO complement binding                                                      | 1 | 1 | 0.068348 | 3.69201445 |
| GO regulation of mitochondrion organization                                | 1 | 1 | 0.068348 | 3.69201445 |
| GO activation of immune response                                           | 1 | 1 | 0.068348 | 3.69201445 |
| GO cytokine production involved in immune response                         | 1 | 1 | 0.068348 | 3.69201445 |
| GO detection of muramyl dipeptide                                          | 1 | 1 | 0.068348 | 3.69201445 |
| GO immunoglobulin production during immune response                        | 1 | 1 | 0.068348 | 3.69201445 |
| GO macrophage inflammatory protein-1 alpha production                      | 1 | 1 | 0.068348 | 3.69201445 |
| GO muramyl dipeptide binding                                               | 1 | 1 | 0.068348 | 3.69201445 |
| GO negative regulation of interleukin-18 production                        | 1 | 1 | 0.068348 | 3.69201445 |
| GO negative regulation of toll-like receptor 2 signaling pathway           | 1 | 1 | 0.068348 | 3.69201445 |
| GO glutamate:sodium symporter activity                                     | 1 | 1 | 0.068348 | 3.69201445 |
| GO branch elongation involved in ureteric bud branching                    | 1 | 1 | 0.068348 | 3.69201445 |
| GO bronchus development                                                    | 1 | 1 | 0.068348 | 3.69201445 |
| GO bud dilation involved in lung branching                                 | 1 | 1 | 0.068348 | 3.69201445 |
| GO epithelial cell proliferation involved in lung morphogenesis            | 1 | 1 | 0.068348 | 3.69201445 |
| GO intermediate mesodermal cell differentiation                            | 1 | 1 | 0.068348 | 3.69201445 |
| GO mammary gland formation                                                 | 1 | 1 | 0.068348 | 3.69201445 |
| GO negative regulation of branching involved in ureteric bud morphogene    | 1 | 1 | 0.068348 | 3.69201445 |
| GO negative regulation of glomerulus development                           | 1 | 1 | 0.068348 | 3.69201445 |
| GO trachea formation                                                       | 1 | 1 | 0.068348 | 3.69201445 |
| GO creatine transporter activity                                           | 1 | 1 | 0.068348 | 3.69201445 |
| GO creatine transport                                                      | 1 | 1 | 0.068348 | 3.69201445 |
| GO creatine:sodium symporter activity                                      | 1 | 1 | 0.068348 | 3.69201445 |
| GO channel inhibitor activity                                              | 1 | 1 | 0.068348 | 3.69201445 |
| GO negative regulation of amino acid transport                             | 1 | 1 | 0.068348 | 3.69201445 |
| GO oligopeptide transporter activity                                       | 1 | 1 | 0.068348 | 3.69201445 |
| GO antibiotic transporter activity                                         | 1 | 1 | 0.068348 | 3.69201445 |
| GO antibiotic transport                                                    | 1 | 1 | 0.068348 | 3.69201445 |
| GO dipeptide transporter activity                                          | 1 | 1 | 0.068348 | 3.69201445 |

|                                                                           |   |   |          |            |
|---------------------------------------------------------------------------|---|---|----------|------------|
| GO dipeptide transport                                                    | 1 | 1 | 0.068348 | 3.69201445 |
| GO high affinity oligopeptide transporter activity                        | 1 | 1 | 0.068348 | 3.69201445 |
| GO negative regulation of dopamine uptake                                 | 1 | 1 | 0.068348 | 3.69201445 |
| GO negative regulation of monooxygenase activity                          | 1 | 1 | 0.068348 | 3.69201445 |
| GO negative regulation of norepinephrine uptake                           | 1 | 1 | 0.068348 | 3.69201445 |
| GO negative regulation of serotonin uptake                                | 1 | 1 | 0.068348 | 3.69201445 |
| GO negative regulation of thrombin receptor signaling pathway             | 1 | 1 | 0.068348 | 3.69201445 |
| GO neutral lipid metabolic process                                        | 1 | 1 | 0.068348 | 3.69201445 |
| GO phospholipase D inhibitor activity                                     | 1 | 1 | 0.068348 | 3.69201445 |
| GO regulation of acyl-CoA biosynthetic process                            | 1 | 1 | 0.068348 | 3.69201445 |
| GO regulation of phospholipase activity                                   | 1 | 1 | 0.068348 | 3.69201445 |
| GO regulation of synaptic vesicle priming                                 | 1 | 1 | 0.068348 | 3.69201445 |
| GO thromboxane-A synthase activity                                        | 1 | 1 | 0.068348 | 3.69201445 |
| GO respiratory burst involved in inflammatory response                    | 1 | 1 | 0.068348 | 3.69201445 |
| GO radial pattern formation                                               | 1 | 1 | 0.068348 | 3.69201445 |
| GO definitive erythrocyte differentiation                                 | 1 | 1 | 0.068348 | 3.69201445 |
| GO response to luteinizing hormone stimulus                               | 1 | 1 | 0.068348 | 3.69201445 |
| GO transforming growth factor beta receptor activity, type III            | 1 | 1 | 0.068348 | 3.69201445 |
| GO cellular response to bacterial lipopeptide                             | 1 | 1 | 0.068348 | 3.69201445 |
| GO chloramphenicol transport                                              | 1 | 1 | 0.068348 | 3.69201445 |
| GO triacylated lipopeptide binding                                        | 1 | 1 | 0.068348 | 3.69201445 |
| GO detection of virus                                                     | 1 | 1 | 0.068348 | 3.69201445 |
| GO detection of fungus                                                    | 1 | 1 | 0.068348 | 3.69201445 |
| GO innate immune response-activating signal transduction                  | 1 | 1 | 0.068348 | 3.69201445 |
| GO intestinal epithelial structure maintenance                            | 1 | 1 | 0.068348 | 3.69201445 |
| GO negative regulation of interleukin-17 production                       | 1 | 1 | 0.068348 | 3.69201445 |
| GO negative regulation of interleukin-23 production                       | 1 | 1 | 0.068348 | 3.69201445 |
| GO positive regulation of interleukin-1 production                        | 1 | 1 | 0.068348 | 3.69201445 |
| GO positive regulation of nucleotide-binding oligomerization domain cont  | 1 | 1 | 0.068348 | 3.69201445 |
| GO positive regulation of nucleotide-binding oligomerization domain cont  | 1 | 1 | 0.068348 | 3.69201445 |
| GO production of nitric oxide involved in inflammatory response           | 1 | 1 | 0.068348 | 3.69201445 |
| GO positive regulation of type IIa hypersensitivity                       | 1 | 1 | 0.068348 | 3.69201445 |
| GO ionotropic glutamate receptor complex                                  | 1 | 1 | 0.068348 | 3.69201445 |
| GO negative regulation of mesenchymal cell proliferation                  | 1 | 1 | 0.068348 | 3.69201445 |
| GO positive regulation of cytokine secretion during immune response       | 1 | 1 | 0.068348 | 3.69201445 |
| GO receptor tyrosine kinase-like orphan receptor binding                  | 1 | 1 | 0.068348 | 3.69201445 |
| GO positive regulation of nuclear-transcribed mRNA poly(A) tail shortenin | 1 | 1 | 0.068348 | 3.69201445 |
| GO negative regulation of nuclease activity                               | 1 | 1 | 0.068348 | 3.69201445 |
| GO oxidoreductase activity, acting on the CH-OH group of donors, quinon   | 1 | 1 | 0.068348 | 3.69201445 |
| GO calcitonin binding                                                     | 1 | 1 | 0.068348 | 3.69201445 |
| GO semicircular canal morphogenesis                                       | 1 | 1 | 0.068348 | 3.69201445 |
| GO vestibular reflex                                                      | 1 | 1 | 0.068348 | 3.69201445 |
| GO hydroxypyruvate isomerase activity                                     | 1 | 1 | 0.068348 | 3.69201445 |
| GO calcium-dependent cysteine-type endopeptidase inhibitor activity       | 1 | 1 | 0.068348 | 3.69201445 |
| GO CMP-N-acetylneuraminate monooxygenase activity                         | 1 | 1 | 0.068348 | 3.69201445 |
| GO patched ligand maturation                                              | 1 | 1 | 0.068348 | 3.69201445 |
| GO negative regulation of skeletal muscle tissue development              | 1 | 1 | 0.068348 | 3.69201445 |
| GO ribonuclease T2 activity                                               | 1 | 1 | 0.068348 | 3.69201445 |
| GO BMP signaling pathway involved in spinal cord dorsal/ventral patternir | 1 | 1 | 0.068348 | 3.69201445 |

|                                                                         |    |     |          |            |
|-------------------------------------------------------------------------|----|-----|----------|------------|
| GO floor plate development                                              | 1  | 1   | 0.068348 | 3.69201445 |
| GO galactosylgalactosylglucosylceramide beta-D-acetylgalactosaminyltran | 1  | 1   | 0.068348 | 3.69201445 |
| GO positive regulation of protein oligomerization                       | 1  | 1   | 0.068348 | 3.69201445 |
| GO phosphatidic acid binding                                            | 1  | 1   | 0.068348 | 3.69201445 |
| GO negative regulation of Golgi to plasma membrane protein transport    | 1  | 1   | 0.068348 | 3.69201445 |
| GO trans-Golgi network transport vesicle membrane                       | 1  | 1   | 0.068348 | 3.69201445 |
| GO pyruvate secondary active transmembrane transporter activity         | 1  | 1   | 0.068348 | 3.69201445 |
| GO pyruvate transport                                                   | 1  | 1   | 0.068348 | 3.69201445 |
| GO opsonin receptor activity                                            | 1  | 1   | 0.068348 | 3.69201445 |
| GO nicotinate phosphoribosyltransferase activity                        | 1  | 1   | 0.068348 | 3.69201445 |
| GO phosphorus-oxygen lyase activity                                     | 1  | 1   | 0.068348 | 3.69201445 |
| GO glucose 1-dehydrogenase activity                                     | 1  | 1   | 0.068348 | 3.69201445 |
| GO guanine deaminase activity                                           | 1  | 1   | 0.068348 | 3.69201445 |
| GO detection of hormone stimulus                                        | 1  | 1   | 0.068348 | 3.69201445 |
| GO glycoprotein transporter activity                                    | 1  | 1   | 0.068348 | 3.69201445 |
| GO glycoprotein transport                                               | 1  | 1   | 0.068348 | 3.69201445 |
| GO regulation of cholesterol esterification                             | 1  | 1   | 0.068348 | 3.69201445 |
| GO sterol-transporting ATPase activity                                  | 1  | 1   | 0.068348 | 3.69201445 |
| GO regulation of striated muscle cell differentiation                   | 1  | 1   | 0.068348 | 3.69201445 |
| GO rhombomere 6 development                                             | 1  | 1   | 0.068348 | 3.69201445 |
| GO cytokine metabolic process                                           | 1  | 1   | 0.068348 | 3.69201445 |
| GO meiotic cohesin complex                                              | 1  | 1   | 0.068348 | 3.69201445 |
| GO positive regulation of I-kappaB kinase/NF-kappaB cascade             | 12 | 109 | 0.068635 | 1.73201304 |
| GO cell cortex                                                          | 9  | 75  | 0.069117 | 1.77612679 |
| GO calcium-mediated signaling                                           | 5  | 33  | 0.071416 | 1.89488958 |
| GO learning or memory                                                   | 5  | 33  | 0.071416 | 1.89488958 |
| GO lipid metabolic process                                              | 20 | 206 | 0.071456 | 1.64352049 |
| GO chloride channel complex                                             | 7  | 54  | 0.073533 | 1.7870745  |
| GO oxidation reduction                                                  | 44 | 515 | 0.074186 | 1.5580508  |
| GO ubiquitin protein ligase binding                                     | 6  | 44  | 0.077226 | 1.78993003 |
| GO drug binding                                                         | 6  | 44  | 0.077226 | 1.78993003 |
| GO hydrolase activity, acting on glycosyl bonds                         | 6  | 44  | 0.077226 | 1.78993003 |
| GO response to interleukin-1                                            | 4  | 24  | 0.077361 | 1.90991387 |
| GO defense response to Gram-positive bacterium                          | 4  | 24  | 0.077361 | 1.90991387 |
| GO response to metal ion                                                | 2  | 7   | 0.077889 | 2.27939317 |
| GO positive regulation of ossification                                  | 2  | 7   | 0.077889 | 2.27939317 |
| GO chitin catabolic process                                             | 2  | 7   | 0.077889 | 2.27939317 |
| GO chitinase activity                                                   | 2  | 7   | 0.077889 | 2.27939317 |
| GO retinoic acid binding                                                | 2  | 7   | 0.077889 | 2.27939317 |
| GO axon regeneration                                                    | 2  | 7   | 0.077889 | 2.27939317 |
| GO fibril organization                                                  | 2  | 7   | 0.077889 | 2.27939317 |
| GO dopamine binding                                                     | 2  | 7   | 0.077889 | 2.27939317 |
| GO negative regulation of peptidyl-serine phosphorylation               | 2  | 7   | 0.077889 | 2.27939317 |
| GO exogenous drug catabolic process                                     | 2  | 7   | 0.077889 | 2.27939317 |
| GO negative regulation of cAMP biosynthetic process                     | 2  | 7   | 0.077889 | 2.27939317 |
| GO smooth muscle cell differentiation                                   | 2  | 7   | 0.077889 | 2.27939317 |
| GO detection of light stimulus involved in visual perception            | 2  | 7   | 0.077889 | 2.27939317 |
| GO bHLH transcription factor binding                                    | 2  | 7   | 0.077889 | 2.27939317 |
| GO embryonic process involved in female pregnancy                       | 2  | 7   | 0.077889 | 2.27939317 |



|    |                                                                 |    |     |          |            |
|----|-----------------------------------------------------------------|----|-----|----------|------------|
| GO | central nervous system neuron development                       | 2  | 7   | 0.077889 | 2.27939317 |
| GO | negative regulation of T cell receptor signaling pathway        | 2  | 7   | 0.077889 | 2.27939317 |
| GO | cellular homeostasis                                            | 2  | 7   | 0.077889 | 2.27939317 |
| GO | pancreatic juice secretion                                      | 2  | 7   | 0.077889 | 2.27939317 |
| GO | positive regulation of interleukin-12 biosynthetic process      | 2  | 7   | 0.077889 | 2.27939317 |
| GO | wound healing, spreading of epidermal cells                     | 2  | 7   | 0.077889 | 2.27939317 |
| GO | positive regulation of Notch signaling pathway                  | 2  | 7   | 0.077889 | 2.27939317 |
| GO | response to selenium ion                                        | 2  | 7   | 0.077889 | 2.27939317 |
| GO | negative regulation of myoblast differentiation                 | 2  | 7   | 0.077889 | 2.27939317 |
| GO | negative regulation of synaptic transmission, GABAergic         | 2  | 7   | 0.077889 | 2.27939317 |
| GO | aggresome                                                       | 2  | 7   | 0.077889 | 2.27939317 |
| GO | 3',5'-cyclic-GMP phosphodiesterase activity                     | 2  | 7   | 0.077889 | 2.27939317 |
| GO | phototransduction, visible light                                | 2  | 7   | 0.077889 | 2.27939317 |
| GO | chromatoid body                                                 | 2  | 7   | 0.077889 | 2.27939317 |
| GO | CARD domain binding                                             | 2  | 7   | 0.077889 | 2.27939317 |
| GO | negative regulation of interferon-gamma production              | 2  | 7   | 0.077889 | 2.27939317 |
| GO | hyperosmotic response                                           | 2  | 7   | 0.077889 | 2.27939317 |
| GO | positive regulation of chemokine biosynthetic process           | 2  | 7   | 0.077889 | 2.27939317 |
| GO | positive regulation of interferon-beta biosynthetic process     | 2  | 7   | 0.077889 | 2.27939317 |
| GO | regulation of mRNA stability                                    | 2  | 7   | 0.077889 | 2.27939317 |
| GO | transmembrane receptor protein serine/threonine kinase activity | 2  | 7   | 0.077889 | 2.27939317 |
| GO | response to biotic stimulus                                     | 3  | 15  | 0.078221 | 2.0213543  |
| GO | water transport                                                 | 3  | 15  | 0.078221 | 2.0213543  |
| GO | cellular response to heat                                       | 3  | 15  | 0.078221 | 2.0213543  |
| GO | positive regulation of phagocytosis                             | 3  | 15  | 0.078221 | 2.0213543  |
| GO | response to vitamin D                                           | 3  | 15  | 0.078221 | 2.0213543  |
| GO | polysome                                                        | 3  | 15  | 0.078221 | 2.0213543  |
| GO | phosphatidylinositol-4,5-bisphosphate binding                   | 3  | 15  | 0.078221 | 2.0213543  |
| GO | extrinsic to membrane                                           | 5  | 34  | 0.07924  | 1.82037319 |
| GO | perikaryon                                                      | 5  | 34  | 0.07924  | 1.82037319 |
| GO | lipid transport                                                 | 8  | 66  | 0.079814 | 1.70484899 |
| GO | anatomical structure morphogenesis                              | 11 | 101 | 0.083773 | 1.6197354  |
| GO | glucose homeostasis                                             | 6  | 45  | 0.084217 | 1.72955338 |
| GO | GTPase activity                                                 | 19 | 198 | 0.084525 | 1.54773173 |
| GO | epidermal growth factor receptor signaling pathway              | 4  | 25  | 0.087341 | 1.81716987 |
| GO | mammary gland development                                       | 4  | 25  | 0.087341 | 1.81716987 |
| GO | skeletal system morphogenesis                                   | 4  | 25  | 0.087341 | 1.81716987 |
| GO | feeding behavior                                                | 4  | 25  | 0.087341 | 1.81716987 |
| GO | positive regulation of B cell proliferation                     | 4  | 25  | 0.087341 | 1.81716987 |
| GO | positive regulation of protein amino acid phosphorylation       | 5  | 35  | 0.087503 | 1.74840286 |
| GO | steroid metabolic process                                       | 8  | 68  | 0.091405 | 1.61387119 |
| GO | regulation of small GTPase mediated signal transduction         | 6  | 46  | 0.091545 | 1.67071297 |
| GO | carbonate dehydratase activity                                  | 3  | 16  | 0.091572 | 1.88947898 |
| GO | glycosaminoglycan binding                                       | 3  | 16  | 0.091572 | 1.88947898 |
| GO | negative regulation of blood pressure                           | 3  | 16  | 0.091572 | 1.88947898 |
| GO | antigen binding                                                 | 3  | 16  | 0.091572 | 1.88947898 |
| GO | neurogenesis                                                    | 3  | 16  | 0.091572 | 1.88947898 |
| GO | carbohydrate binding                                            | 3  | 16  | 0.091572 | 1.88947898 |
| GO | gap junction                                                    | 3  | 16  | 0.091572 | 1.88947898 |

|                                                                           |    |     |          |            |
|---------------------------------------------------------------------------|----|-----|----------|------------|
| GO neuron fate commitment                                                 | 3  | 16  | 0.091572 | 1.88947898 |
| GO negative regulation of protein amino acid phosphorylation              | 3  | 16  | 0.091572 | 1.88947898 |
| GO negative regulation of endothelial cell proliferation                  | 3  | 16  | 0.091572 | 1.88947898 |
| GO regulation of cell growth                                              | 7  | 57  | 0.092377 | 1.63176254 |
| GO liver development                                                      | 7  | 57  | 0.092377 | 1.63176254 |
| GO ion channel activity                                                   | 15 | 151 | 0.092713 | 1.5150815  |
| GO calcium ion binding                                                    | 50 | 605 | 0.093517 | 1.41623362 |
| GO skeletal muscle tissue development                                     | 5  | 36  | 0.096195 | 1.67880982 |
| GO ovarian follicle development                                           | 5  | 36  | 0.096195 | 1.67880982 |
| GO insulin receptor signaling pathway                                     | 5  | 36  | 0.096195 | 1.67880982 |
| GO extracellular matrix structural constituent                            | 8  | 69  | 0.097545 | 1.56951049 |
| GO negative regulation of apoptosis                                       | 14 | 140 | 0.097659 | 1.48959411 |
| GO cell differentiation                                                   | 40 | 474 | 0.097833 | 1.40146099 |
| GO cellular response to hormone stimulus                                  | 4  | 26  | 0.097908 | 1.72877463 |
| GO branching involved in ureteric bud morphogenesis                       | 4  | 26  | 0.097908 | 1.72877463 |
| GO negative regulation of epithelial cell proliferation                   | 4  | 26  | 0.097908 | 1.72877463 |
| GO chloride channel activity                                              | 7  | 58  | 0.099204 | 1.5820587  |
| GO oxidoreductase activity, acting on single donors with incorporation of | 7  | 58  | 0.099204 | 1.5820587  |
| GO UDP-galactose:beta-N-acetylglucosamine beta-1,3-galactosyltransfera    | 2  | 8   | 0.099269 | 2.03645393 |
| GO phosphate transport                                                    | 2  | 8   | 0.099269 | 2.03645393 |
| GO regulation of calcium ion-dependent exocytosis                         | 2  | 8   | 0.099269 | 2.03645393 |
| GO secretory granule membrane                                             | 2  | 8   | 0.099269 | 2.03645393 |
| GO embryonic viscerocranium morphogenesis                                 | 2  | 8   | 0.099269 | 2.03645393 |
| GO behavioral response to cocaine                                         | 2  | 8   | 0.099269 | 2.03645393 |
| GO positive regulation of neuroblast proliferation                        | 2  | 8   | 0.099269 | 2.03645393 |
| GO regulation of heart rate                                               | 2  | 8   | 0.099269 | 2.03645393 |
| GO regulation of sodium ion transport                                     | 2  | 8   | 0.099269 | 2.03645393 |
| GO phosphoinositide 3-kinase cascade                                      | 2  | 8   | 0.099269 | 2.03645393 |
| GO cellular response to hydrogen peroxide                                 | 2  | 8   | 0.099269 | 2.03645393 |
| GO histone acetyltransferase complex                                      | 2  | 8   | 0.099269 | 2.03645393 |
| GO negative regulation of programmed cell death                           | 2  | 8   | 0.099269 | 2.03645393 |
| GO protein autoprocessing                                                 | 2  | 8   | 0.099269 | 2.03645393 |
| GO positive regulation of chondrocyte differentiation                     | 2  | 8   | 0.099269 | 2.03645393 |
| GO positive regulation of leukocyte chemotaxis                            | 2  | 8   | 0.099269 | 2.03645393 |
| GO regulation of embryonic development                                    | 2  | 8   | 0.099269 | 2.03645393 |
| GO positive regulation of leukocyte migration                             | 2  | 8   | 0.099269 | 2.03645393 |
| GO mannosyl-oligosaccharide 1,2-alpha-mannosidase activity                | 2  | 8   | 0.099269 | 2.03645393 |
| GO glycosphingolipid biosynthetic process                                 | 2  | 8   | 0.099269 | 2.03645393 |
| GO glycerophosphodiester phosphodiesterase activity                       | 2  | 8   | 0.099269 | 2.03645393 |
| GO phosphatidylinositol-3-phosphate binding                               | 2  | 8   | 0.099269 | 2.03645393 |
| GO mesonephros development                                                | 2  | 8   | 0.099269 | 2.03645393 |
| GO peptidoglycan binding                                                  | 2  | 8   | 0.099269 | 2.03645393 |
| GO positive regulation of endocytosis                                     | 2  | 8   | 0.099269 | 2.03645393 |
| GO regulation of dopamine secretion                                       | 2  | 8   | 0.099269 | 2.03645393 |
| GO syntaxin-1 binding                                                     | 2  | 8   | 0.099269 | 2.03645393 |
| GO cobalamin binding                                                      | 2  | 8   | 0.099269 | 2.03645393 |
| GO negative regulation of endothelial cell migration                      | 2  | 8   | 0.099269 | 2.03645393 |
| GO calcium channel complex                                                | 2  | 8   | 0.099269 | 2.03645393 |
| GO protein amino acid phosphorylation                                     | 41 | 488 | 0.099532 | 1.38957171 |

|    |                                                                      |    |     |          |            |
|----|----------------------------------------------------------------------|----|-----|----------|------------|
| GO | endoplasmic reticulum                                                | 70 | 880 | 0.102142 | 1.34789252 |
| GO | heparin binding                                                      | 11 | 105 | 0.103256 | 1.48273034 |
| GO | response to ethanol                                                  | 8  | 70  | 0.103912 | 1.52586823 |
| GO | oxygen binding                                                       | 5  | 37  | 0.105307 | 1.61144096 |
| GO | positive regulation of pathway-restricted SMAD protein phosphorylati | 3  | 17  | 0.105788 | 1.76739253 |
| GO | aspartic-type endopeptidase activity                                 | 3  | 17  | 0.105788 | 1.76739253 |
| GO | sphingolipid metabolic process                                       | 3  | 17  | 0.105788 | 1.76739253 |
| GO | social behavior                                                      | 3  | 17  | 0.105788 | 1.76739253 |
| GO | actin filament capping                                               | 3  | 17  | 0.105788 | 1.76739253 |
| GO | negative regulation of osteoblast differentiation                    | 3  | 17  | 0.105788 | 1.76739253 |
| GO | transcription corepressor activity                                   | 14 | 142 | 0.106427 | 1.4335163  |
| GO | negative regulation of signal transduction                           | 6  | 48  | 0.107195 | 1.55733646 |
| GO | adherens junction                                                    | 4  | 27  | 0.109039 | 1.64434121 |
| GO | endocytic vesicle                                                    | 4  | 27  | 0.109039 | 1.64434121 |
| GO | positive regulation of fibroblast proliferation                      | 4  | 27  | 0.109039 | 1.64434121 |
| GO | SH2 domain binding                                                   | 4  | 27  | 0.109039 | 1.64434121 |
| GO | transmembrane receptor protein tyrosine kinase signaling pathway     | 8  | 71  | 0.110505 | 1.48292065 |
| GO | GTPase activator activity                                            | 15 | 156 | 0.113798 | 1.3819275  |
| GO | positive regulation of angiogenesis                                  | 5  | 38  | 0.114827 | 1.54615705 |
| GO | digestion                                                            | 6  | 49  | 0.115504 | 1.5026615  |
| GO | phospholipid binding                                                 | 6  | 49  | 0.115504 | 1.5026615  |
| GO | tight junction                                                       | 8  | 72  | 0.11732  | 1.44064511 |
| GO | actin filament organization                                          | 4  | 28  | 0.120707 | 1.5635304  |
| GO | memory                                                               | 4  | 28  | 0.120707 | 1.5635304  |
| GO | positive regulation of DNA replication                               | 4  | 28  | 0.120707 | 1.5635304  |
| GO | sensory perception of pain                                           | 4  | 28  | 0.120707 | 1.5635304  |
| GO | beta-amyloid binding                                                 | 3  | 18  | 0.1208   | 1.65377237 |
| GO | cornified envelope                                                   | 3  | 18  | 0.1208   | 1.65377237 |
| GO | integral to membrane of membrane fraction                            | 3  | 18  | 0.1208   | 1.65377237 |
| GO | establishment or maintenance of cell polarity                        | 3  | 18  | 0.1208   | 1.65377237 |
| GO | polypeptide N-acetylgalactosaminyltransferase activity               | 3  | 18  | 0.1208   | 1.65377237 |
| GO | inner ear development                                                | 3  | 18  | 0.1208   | 1.65377237 |
| GO | inward rectifier potassium channel activity                          | 3  | 18  | 0.1208   | 1.65377237 |
| GO | cytoskeleton organization                                            | 7  | 61  | 0.121282 | 1.43858443 |
| GO | axonogenesis                                                         | 7  | 61  | 0.121282 | 1.43858443 |
| GO | NADPH oxidase complex                                                | 2  | 9   | 0.122036 | 1.82973378 |
| GO | intracellular part                                                   | 2  | 9   | 0.122036 | 1.82973378 |
| GO | negative regulation of interleukin-6 production                      | 2  | 9   | 0.122036 | 1.82973378 |
| GO | negative regulation of protein catabolic process                     | 2  | 9   | 0.122036 | 1.82973378 |
| GO | embryonic foregut morphogenesis                                      | 2  | 9   | 0.122036 | 1.82973378 |
| GO | retinal binding                                                      | 2  | 9   | 0.122036 | 1.82973378 |
| GO | respiratory burst                                                    | 2  | 9   | 0.122036 | 1.82973378 |
| GO | associative learning                                                 | 2  | 9   | 0.122036 | 1.82973378 |
| GO | phosphoinositide metabolic process                                   | 2  | 9   | 0.122036 | 1.82973378 |
| GO | low-density lipoprotein particle remodeling                          | 2  | 9   | 0.122036 | 1.82973378 |
| GO | telencephalon development                                            | 2  | 9   | 0.122036 | 1.82973378 |
| GO | fucosyltransferase activity                                          | 2  | 9   | 0.122036 | 1.82973378 |
| GO | detection of calcium ion                                             | 2  | 9   | 0.122036 | 1.82973378 |
| GO | regulation of MAPKKK cascade                                         | 2  | 9   | 0.122036 | 1.82973378 |

|                                                                           |    |     |          |            |
|---------------------------------------------------------------------------|----|-----|----------|------------|
| GO phospholipase binding                                                  | 2  | 9   | 0.122036 | 1.82973378 |
| GO neuropeptide Y receptor activity                                       | 2  | 9   | 0.122036 | 1.82973378 |
| GO calcium-transporting ATPase activity                                   | 2  | 9   | 0.122036 | 1.82973378 |
| GO ATP hydrolysis coupled proton transport                                | 2  | 9   | 0.122036 | 1.82973378 |
| GO GTP biosynthetic process                                               | 2  | 9   | 0.122036 | 1.82973378 |
| GO nucleoside diphosphate kinase activity                                 | 2  | 9   | 0.122036 | 1.82973378 |
| GO UTP biosynthetic process                                               | 2  | 9   | 0.122036 | 1.82973378 |
| GO lipopolysaccharide binding                                             | 2  | 9   | 0.122036 | 1.82973378 |
| GO M band                                                                 | 2  | 9   | 0.122036 | 1.82973378 |
| GO male meiosis I                                                         | 2  | 9   | 0.122036 | 1.82973378 |
| GO RNA polymerase II transcription factor activity, enhancer binding      | 5  | 39  | 0.12474  | 1.48283112 |
| GO peptidase inhibitor activity                                           | 9  | 85  | 0.125678 | 1.37438654 |
| GO Golgi apparatus                                                        | 62 | 784 | 0.127321 | 1.21632917 |
| GO embryonic axis specification                                           | 1  | 2   | 0.132028 | 2.41918886 |
| GO coreceptor, soluble ligand activity                                    | 1  | 2   | 0.132028 | 2.41918886 |
| GO mast cell activation                                                   | 1  | 2   | 0.132028 | 2.41918886 |
| GO endoplasmic reticulum Sec complex                                      | 1  | 2   | 0.132028 | 2.41918886 |
| GO iodide transport                                                       | 1  | 2   | 0.132028 | 2.41918886 |
| GO superoxide-generating NADPH oxidase activator activity                 | 1  | 2   | 0.132028 | 2.41918886 |
| GO positive regulation of gluconeogenesis                                 | 1  | 2   | 0.132028 | 2.41918886 |
| GO prenylated protein tyrosine phosphatase activity                       | 1  | 2   | 0.132028 | 2.41918886 |
| GO negative regulation of axon regeneration                               | 1  | 2   | 0.132028 | 2.41918886 |
| GO negative regulation of protein complex disassembly                     | 1  | 2   | 0.132028 | 2.41918886 |
| GO negative regulation of toll-like receptor signaling pathway            | 1  | 2   | 0.132028 | 2.41918886 |
| GO heme transport                                                         | 1  | 2   | 0.132028 | 2.41918886 |
| GO chloride channel regulator activity                                    | 1  | 2   | 0.132028 | 2.41918886 |
| GO acyl carnitine transporter activity                                    | 1  | 2   | 0.132028 | 2.41918886 |
| GO myosin II complex                                                      | 1  | 2   | 0.132028 | 2.41918886 |
| GO insulin processing                                                     | 1  | 2   | 0.132028 | 2.41918886 |
| GO anion homeostasis                                                      | 1  | 2   | 0.132028 | 2.41918886 |
| GO response to oleic acid                                                 | 1  | 2   | 0.132028 | 2.41918886 |
| GO complement receptor activity                                           | 1  | 2   | 0.132028 | 2.41918886 |
| GO macrophage colony stimulating factor receptor binding                  | 1  | 2   | 0.132028 | 2.41918886 |
| GO positive regulation of odontogenesis of dentine-containing tooth       | 1  | 2   | 0.132028 | 2.41918886 |
| GO heat generation                                                        | 1  | 2   | 0.132028 | 2.41918886 |
| GO negative regulation of smooth muscle contraction                       | 1  | 2   | 0.132028 | 2.41918886 |
| GO positive regulation of skeletal muscle tissue growth                   | 1  | 2   | 0.132028 | 2.41918886 |
| GO vasodilation by norepinephrine-epinephrine involved in regulation of s | 1  | 2   | 0.132028 | 2.41918886 |
| GO (S)-limonene 6-monooxygenase activity                                  | 1  | 2   | 0.132028 | 2.41918886 |
| GO (S)-limonene 7-monooxygenase activity                                  | 1  | 2   | 0.132028 | 2.41918886 |
| GO 4-hydroxyacetophenone monooxygenase activity                           | 1  | 2   | 0.132028 | 2.41918886 |
| GO monocarboxylic acid metabolic process                                  | 1  | 2   | 0.132028 | 2.41918886 |
| GO primary lung bud formation                                             | 1  | 2   | 0.132028 | 2.41918886 |
| GO retinoic acid biosynthetic process                                     | 1  | 2   | 0.132028 | 2.41918886 |
| GO alkaloid catabolic process                                             | 1  | 2   | 0.132028 | 2.41918886 |
| GO ceramide cholinephosphotransferase activity                            | 1  | 2   | 0.132028 | 2.41918886 |
| GO sphingomyelin synthase activity                                        | 1  | 2   | 0.132028 | 2.41918886 |
| GO transferrin transport                                                  | 1  | 2   | 0.132028 | 2.41918886 |
| GO negative regulation of dopamine receptor signaling pathway             | 1  | 2   | 0.132028 | 2.41918886 |

|    |                                                                         |   |   |          |            |
|----|-------------------------------------------------------------------------|---|---|----------|------------|
| GO | neurological system process involved in regulation of systemic arterial | 1 | 2 | 0.132028 | 2.41918886 |
| GO | positive regulation of sodium:hydrogen antiporter activity              | 1 | 2 | 0.132028 | 2.41918886 |
| GO | acetyltransferase activator activity                                    | 1 | 2 | 0.132028 | 2.41918886 |
| GO | brain renin-angiotensin system                                          | 1 | 2 | 0.132028 | 2.41918886 |
| GO | positive regulation of NAD(P)H oxidase activity                         | 1 | 2 | 0.132028 | 2.41918886 |
| GO | regulation of blood vessel size by renin-angiotensin                    | 1 | 2 | 0.132028 | 2.41918886 |
| GO | regulation of renal output by angiotensin                               | 1 | 2 | 0.132028 | 2.41918886 |
| GO | renin-angiotensin regulation of aldosterone production                  | 1 | 2 | 0.132028 | 2.41918886 |
| GO | smooth muscle cell proliferation                                        | 1 | 2 | 0.132028 | 2.41918886 |
| GO | positive regulation of prostaglandin-endoperoxidase synthase activity   | 1 | 2 | 0.132028 | 2.41918886 |
| GO | rhythmic excitation                                                     | 1 | 2 | 0.132028 | 2.41918886 |
| GO | beta-1,3-galactosyl-O-glycosyl-glycoprotein beta-1,3-N-acetylglucosam   | 1 | 2 | 0.132028 | 2.41918886 |
| GO | cellular response to heparin                                            | 1 | 2 | 0.132028 | 2.41918886 |
| GO | cellular response to mycophenolic acid                                  | 1 | 2 | 0.132028 | 2.41918886 |
| GO | rhythmic behavior                                                       | 1 | 2 | 0.132028 | 2.41918886 |
| GO | notochord formation                                                     | 1 | 2 | 0.132028 | 2.41918886 |
| GO | protein-DNA complex assembly                                            | 1 | 2 | 0.132028 | 2.41918886 |
| GO | cellular protein catabolic process                                      | 1 | 2 | 0.132028 | 2.41918886 |
| GO | glutamate uptake involved in synaptic transmission                      | 1 | 2 | 0.132028 | 2.41918886 |
| GO | negative regulation of transferase activity                             | 1 | 2 | 0.132028 | 2.41918886 |
| GO | response to interleukin-15                                              | 1 | 2 | 0.132028 | 2.41918886 |
| GO | IgE receptor activity                                                   | 1 | 2 | 0.132028 | 2.41918886 |
| GO | pancreatic A cell differentiation                                       | 1 | 2 | 0.132028 | 2.41918886 |
| GO | pancreatic B cell differentiation                                       | 1 | 2 | 0.132028 | 2.41918886 |
| GO | dolichol kinase activity                                                | 1 | 2 | 0.132028 | 2.41918886 |
| GO | lacrimial gland development                                             | 1 | 2 | 0.132028 | 2.41918886 |
| GO | paraxial mesodermal cell fate commitment                                | 1 | 2 | 0.132028 | 2.41918886 |
| GO | arachidonate 5-lipoxygenase activity                                    | 1 | 2 | 0.132028 | 2.41918886 |
| GO | alpha-L-fucosidase activity                                             | 1 | 2 | 0.132028 | 2.41918886 |
| GO | negative regulation of receptor recycling                               | 1 | 2 | 0.132028 | 2.41918886 |
| GO | glutamate decarboxylation to succinate                                  | 1 | 2 | 0.132028 | 2.41918886 |
| GO | negative regulation of amyloid precursor protein biosynthetic process   | 1 | 2 | 0.132028 | 2.41918886 |
| GO | glucagon receptor activity                                              | 1 | 2 | 0.132028 | 2.41918886 |
| GO | forebrain neuron fate commitment                                        | 1 | 2 | 0.132028 | 2.41918886 |
| GO | hydrogen peroxide metabolic process                                     | 1 | 2 | 0.132028 | 2.41918886 |
| GO | positive regulation of integrin biosynthetic process                    | 1 | 2 | 0.132028 | 2.41918886 |
| GO | voltage-gated proton channel activity                                   | 1 | 2 | 0.132028 | 2.41918886 |
| GO | glycolipid metabolic process                                            | 1 | 2 | 0.132028 | 2.41918886 |
| GO | purine nucleotide metabolic process                                     | 1 | 2 | 0.132028 | 2.41918886 |
| GO | glutaminase activity                                                    | 1 | 2 | 0.132028 | 2.41918886 |
| GO | C5a anaphylatoxin receptor activity                                     | 1 | 2 | 0.132028 | 2.41918886 |
| GO | artery development                                                      | 1 | 2 | 0.132028 | 2.41918886 |
| GO | smoothened signaling pathway involved in spinal cord motor neuron c     | 1 | 2 | 0.132028 | 2.41918886 |
| GO | smoothened signaling pathway involved in ventral spinal cord interneu   | 1 | 2 | 0.132028 | 2.41918886 |
| GO | DNA nucleotidylexotransferase activity                                  | 1 | 2 | 0.132028 | 2.41918886 |
| GO | glutamate-ammonia ligase activity                                       | 1 | 2 | 0.132028 | 2.41918886 |
| GO | glutamine biosynthetic process                                          | 1 | 2 | 0.132028 | 2.41918886 |
| GO | voluntary musculoskeletal movement                                      | 1 | 2 | 0.132028 | 2.41918886 |
| GO | Pyrin domain binding                                                    | 1 | 2 | 0.132028 | 2.41918886 |

|                                                                         |   |   |          |            |
|-------------------------------------------------------------------------|---|---|----------|------------|
| GO cytokinesis, completion of separation                                | 1 | 2 | 0.132028 | 2.41918886 |
| GO aldehyde oxidase activity                                            | 1 | 2 | 0.132028 | 2.41918886 |
| GO xanthine dehydrogenase activity                                      | 1 | 2 | 0.132028 | 2.41918886 |
| GO epithelial-mesenchymal signaling involved in prostate gland developm | 1 | 2 | 0.132028 | 2.41918886 |
| GO 20-alpha-hydroxysteroid dehydrogenase activity                       | 1 | 2 | 0.132028 | 2.41918886 |
| GO hyaluronan catabolic process                                         | 1 | 2 | 0.132028 | 2.41918886 |
| GO hormone secretion                                                    | 1 | 2 | 0.132028 | 2.41918886 |
| GO cilium movement                                                      | 1 | 2 | 0.132028 | 2.41918886 |
| GO regulation of steroid hormone receptor signaling pathway             | 1 | 2 | 0.132028 | 2.41918886 |
| GO Type I pneumocyte differentiation                                    | 1 | 2 | 0.132028 | 2.41918886 |
| GO protein tyrosine phosphatase activator activity                      | 1 | 2 | 0.132028 | 2.41918886 |
| GO interleukin-2 binding                                                | 1 | 2 | 0.132028 | 2.41918886 |
| GO interleukin-4 receptor activity                                      | 1 | 2 | 0.132028 | 2.41918886 |
| GO interleukin-7 receptor activity                                      | 1 | 2 | 0.132028 | 2.41918886 |
| GO neutrophil apoptosis                                                 | 1 | 2 | 0.132028 | 2.41918886 |
| GO regulation of vascular endothelial growth factor production          | 1 | 2 | 0.132028 | 2.41918886 |
| GO interleukin-6 binding                                                | 1 | 2 | 0.132028 | 2.41918886 |
| GO interleukin-6 receptor activity                                      | 1 | 2 | 0.132028 | 2.41918886 |
| GO cellular response to copper ion                                      | 1 | 2 | 0.132028 | 2.41918886 |
| GO cellular response to mercury ion                                     | 1 | 2 | 0.132028 | 2.41918886 |
| GO cerebrospinal fluid secretion                                        | 1 | 2 | 0.132028 | 2.41918886 |
| GO glycerol transmembrane transporter activity                          | 1 | 2 | 0.132028 | 2.41918886 |
| GO intracellular cGMP activated cation channel activity                 | 1 | 2 | 0.132028 | 2.41918886 |
| GO positive regulation of saliva secretion                              | 1 | 2 | 0.132028 | 2.41918886 |
| GO renal water transport                                                | 1 | 2 | 0.132028 | 2.41918886 |
| GO interleukin-10 receptor activity                                     | 1 | 2 | 0.132028 | 2.41918886 |
| GO 3-phosphoinositide-dependent protein kinase binding                  | 1 | 2 | 0.132028 | 2.41918886 |
| GO positive regulation of respiratory burst                             | 1 | 2 | 0.132028 | 2.41918886 |
| GO ganglioside metabolic process                                        | 1 | 2 | 0.132028 | 2.41918886 |
| GO cellular response to potassium ion starvation                        | 1 | 2 | 0.132028 | 2.41918886 |
| GO acetylcholine receptor regulator activity                            | 1 | 2 | 0.132028 | 2.41918886 |
| GO lymphoid progenitor cell differentiation                             | 1 | 2 | 0.132028 | 2.41918886 |
| GO positive regulation of transcription from RNA polymerase I promoter  | 1 | 2 | 0.132028 | 2.41918886 |
| GO laminin-3 complex                                                    | 1 | 2 | 0.132028 | 2.41918886 |
| GO clathrin-coated endocytic vesicle membrane                           | 1 | 2 | 0.132028 | 2.41918886 |
| GO phospholipase activator activity                                     | 1 | 2 | 0.132028 | 2.41918886 |
| GO leukotriene-C4 synthase activity                                     | 1 | 2 | 0.132028 | 2.41918886 |
| GO paraxial mesoderm morphogenesis                                      | 1 | 2 | 0.132028 | 2.41918886 |
| GO cellular biogenic amine metabolic process                            | 1 | 2 | 0.132028 | 2.41918886 |
| GO negative regulation of serotonin secretion                           | 1 | 2 | 0.132028 | 2.41918886 |
| GO positive regulation of dopamine metabolic process                    | 1 | 2 | 0.132028 | 2.41918886 |
| GO response to aluminum ion                                             | 1 | 2 | 0.132028 | 2.41918886 |
| GO slow-twitch skeletal muscle fiber contraction                        | 1 | 2 | 0.132028 | 2.41918886 |
| GO negative regulation of mast cell apoptosis                           | 1 | 2 | 0.132028 | 2.41918886 |
| GO positive regulation of mast cell proliferation                       | 1 | 2 | 0.132028 | 2.41918886 |
| GO cerebral cortex GABAergic interneuron differentiation                | 1 | 2 | 0.132028 | 2.41918886 |
| GO olfactory pit development                                            | 1 | 2 | 0.132028 | 2.41918886 |
| GO subpallium neuron fate commitment                                    | 1 | 2 | 0.132028 | 2.41918886 |
| GO macrophage colony stimulating factor receptor activity               | 1 | 2 | 0.132028 | 2.41918886 |

|                                                                              |   |   |          |            |
|------------------------------------------------------------------------------|---|---|----------|------------|
| GO Bcl3/NF-kappaB2 complex                                                   | 1 | 2 | 0.132028 | 2.41918886 |
| GO follicular dendritic cell differentiation                                 | 1 | 2 | 0.132028 | 2.41918886 |
| GO nucleotide-binding oligomerization domain containing 1 signaling patf     | 1 | 2 | 0.132028 | 2.41918886 |
| GO D-serine transport                                                        | 1 | 2 | 0.132028 | 2.41918886 |
| GO aconitate hydratase activity                                              | 1 | 2 | 0.132028 | 2.41918886 |
| GO iron-responsive element binding                                           | 1 | 2 | 0.132028 | 2.41918886 |
| GO negative regulation of photoreceptor cell differentiation                 | 1 | 2 | 0.132028 | 2.41918886 |
| GO positive regulation of transcription of Notch receptor target             | 1 | 2 | 0.132028 | 2.41918886 |
| GO response to insecticide                                                   | 1 | 2 | 0.132028 | 2.41918886 |
| GO nerve growth factor production                                            | 1 | 2 | 0.132028 | 2.41918886 |
| GO dopamine uptake                                                           | 1 | 2 | 0.132028 | 2.41918886 |
| GO negative regulation of actin filament bundle assembly                     | 1 | 2 | 0.132028 | 2.41918886 |
| GO negative regulation of release of cytochrome c from mitochondria          | 1 | 2 | 0.132028 | 2.41918886 |
| GO protein K63-linked ubiquitination                                         | 1 | 2 | 0.132028 | 2.41918886 |
| GO embryonic body morphogenesis                                              | 1 | 2 | 0.132028 | 2.41918886 |
| GO response to chlorate                                                      | 1 | 2 | 0.132028 | 2.41918886 |
| GO detection of light stimulus                                               | 1 | 2 | 0.132028 | 2.41918886 |
| GO positive regulation of plasma membrane long-chain fatty acid transpor     | 1 | 2 | 0.132028 | 2.41918886 |
| GO cytoplasmic cyclin-dependent protein kinase holoenzyme complex            | 1 | 2 | 0.132028 | 2.41918886 |
| GO myoblast cell fate commitment                                             | 1 | 2 | 0.132028 | 2.41918886 |
| GO PML body organization                                                     | 1 | 2 | 0.132028 | 2.41918886 |
| GO regulation of MHC class I biosynthetic process                            | 1 | 2 | 0.132028 | 2.41918886 |
| GO anatomical structure development                                          | 1 | 2 | 0.132028 | 2.41918886 |
| GO embryonic epithelial tube formation                                       | 1 | 2 | 0.132028 | 2.41918886 |
| GO somatotropin secreting cell differentiation                               | 1 | 2 | 0.132028 | 2.41918886 |
| GO hydroxymethylglutaryl-CoA lyase activity                                  | 1 | 2 | 0.132028 | 2.41918886 |
| GO BMP signaling pathway involved in heart induction                         | 1 | 2 | 0.132028 | 2.41918886 |
| GO cardiac cell fate determination                                           | 1 | 2 | 0.132028 | 2.41918886 |
| GO negative regulation of gene silencing by miRNA                            | 1 | 2 | 0.132028 | 2.41918886 |
| GO negative regulation of receptor biosynthetic process                      | 1 | 2 | 0.132028 | 2.41918886 |
| GO 1-alkylglycerophosphocholine O-acetyltransferase activity                 | 1 | 2 | 0.132028 | 2.41918886 |
| GO germ-line stem cell maintenance                                           | 1 | 2 | 0.132028 | 2.41918886 |
| GO establishment of epithelial cell polarity                                 | 1 | 2 | 0.132028 | 2.41918886 |
| GO oxidoreductase activity, acting on sulfur group of donors, disulfide as a | 1 | 2 | 0.132028 | 2.41918886 |
| GO activation of phospholipase A2 activity by calcium-mediated signaling     | 1 | 2 | 0.132028 | 2.41918886 |
| GO neuromedin U receptor activity                                            | 1 | 2 | 0.132028 | 2.41918886 |
| GO inositol trisphosphate biosynthetic process                               | 1 | 2 | 0.132028 | 2.41918886 |
| GO prostaglandin F receptor activity                                         | 1 | 2 | 0.132028 | 2.41918886 |
| GO negative regulation of epinephrine secretion                              | 1 | 2 | 0.132028 | 2.41918886 |
| GO negative regulation of norepinephrine secretion                           | 1 | 2 | 0.132028 | 2.41918886 |
| GO prostaglandin-endoperoxide synthase activity                              | 1 | 2 | 0.132028 | 2.41918886 |
| GO cellular pigment accumulation                                             | 1 | 2 | 0.132028 | 2.41918886 |
| GO myosin V binding                                                          | 1 | 2 | 0.132028 | 2.41918886 |
| GO natural killer cell degranulation                                         | 1 | 2 | 0.132028 | 2.41918886 |
| GO embryonic retina morphogenesis in camera-type eye                         | 1 | 2 | 0.132028 | 2.41918886 |
| GO female genitalia morphogenesis                                            | 1 | 2 | 0.132028 | 2.41918886 |
| GO angiotensin maturation                                                    | 1 | 2 | 0.132028 | 2.41918886 |
| GO negative regulation of isotype switching to IgE isotypes                  | 1 | 2 | 0.132028 | 2.41918886 |
| GO negative regulation of mast cell cytokine production                      | 1 | 2 | 0.132028 | 2.41918886 |

|    |                                                                           |   |   |          |            |
|----|---------------------------------------------------------------------------|---|---|----------|------------|
| GO | regulation of Rho GTPase activity                                         | 1 | 2 | 0.132028 | 2.41918886 |
| GO | 3-hydroxybutyrate dehydrogenase activity                                  | 1 | 2 | 0.132028 | 2.41918886 |
| GO | vitamin metabolic process                                                 | 1 | 2 | 0.132028 | 2.41918886 |
| GO | 3-oxoacid CoA-transferase activity                                        | 1 | 2 | 0.132028 | 2.41918886 |
| GO | ketone body catabolic process                                             | 1 | 2 | 0.132028 | 2.41918886 |
| GO | positive regulation of biosynthetic process of antibacterial peptides ac  | 1 | 2 | 0.132028 | 2.41918886 |
| GO | regulation of neutrophil chemotaxis                                       | 1 | 2 | 0.132028 | 2.41918886 |
| GO | protein-disulfide reductase activity                                      | 1 | 2 | 0.132028 | 2.41918886 |
| GO | cardiac septum development                                                | 1 | 2 | 0.132028 | 2.41918886 |
| GO | cloacal septation                                                         | 1 | 2 | 0.132028 | 2.41918886 |
| GO | positive regulation of kidney development                                 | 1 | 2 | 0.132028 | 2.41918886 |
| GO | telencephalon regionalization                                             | 1 | 2 | 0.132028 | 2.41918886 |
| GO | urea transmembrane transporter activity                                   | 1 | 2 | 0.132028 | 2.41918886 |
| GO | proton-dependent oligopeptide secondary active transmembrane trar         | 1 | 2 | 0.132028 | 2.41918886 |
| GO | negative regulation of exocytosis                                         | 1 | 2 | 0.132028 | 2.41918886 |
| GO | negative regulation of platelet-derived growth factor receptor signalin   | 1 | 2 | 0.132028 | 2.41918886 |
| GO | positive regulation of inositol phosphate biosynthetic process            | 1 | 2 | 0.132028 | 2.41918886 |
| GO | regulation of glutamate secretion                                         | 1 | 2 | 0.132028 | 2.41918886 |
| GO | positive regulation of isotype switching to IgE isotypes                  | 1 | 2 | 0.132028 | 2.41918886 |
| GO | platelet degranulation                                                    | 1 | 2 | 0.132028 | 2.41918886 |
| GO | syntaxin-2 binding                                                        | 1 | 2 | 0.132028 | 2.41918886 |
| GO | lactate transmembrane transporter activity                                | 1 | 2 | 0.132028 | 2.41918886 |
| GO | B cell receptor complex                                                   | 1 | 2 | 0.132028 | 2.41918886 |
| GO | beta selection                                                            | 1 | 2 | 0.132028 | 2.41918886 |
| GO | homeostasis of number of cells                                            | 1 | 2 | 0.132028 | 2.41918886 |
| GO | negative regulation of oxygen and reactive oxygen species metabolic p     | 1 | 2 | 0.132028 | 2.41918886 |
| GO | negative regulation of T cell differentiation                             | 1 | 2 | 0.132028 | 2.41918886 |
| GO | regulation of transcription involved in lymphatic endothelial cell fate c | 1 | 2 | 0.132028 | 2.41918886 |
| GO | response to follicle-stimulating hormone stimulus                         | 1 | 2 | 0.132028 | 2.41918886 |
| GO | cell surface pattern recognition receptor signaling pathway               | 1 | 2 | 0.132028 | 2.41918886 |
| GO | cellular response to diacylated bacterial lipopeptide                     | 1 | 2 | 0.132028 | 2.41918886 |
| GO | cellular response to triacylated bacterial lipopeptide                    | 1 | 2 | 0.132028 | 2.41918886 |
| GO | detection of diacylated bacterial lipopeptide                             | 1 | 2 | 0.132028 | 2.41918886 |
| GO | detection of triacylated bacterial lipopeptide                            | 1 | 2 | 0.132028 | 2.41918886 |
| GO | positive regulation of interleukin-18 production                          | 1 | 2 | 0.132028 | 2.41918886 |
| GO | response to bacterial lipoprotein                                         | 1 | 2 | 0.132028 | 2.41918886 |
| GO | Toll-like receptor 1-Toll-like receptor 2 protein complex                 | 1 | 2 | 0.132028 | 2.41918886 |
| GO | response to lipoteichoic acid                                             | 1 | 2 | 0.132028 | 2.41918886 |
| GO | positive regulation of activation of membrane attack complex              | 1 | 2 | 0.132028 | 2.41918886 |
| GO | cellular response to interferon-gamma                                     | 1 | 2 | 0.132028 | 2.41918886 |
| GO | hypophysis morphogenesis                                                  | 1 | 2 | 0.132028 | 2.41918886 |
| GO | lateral sprouting involved in mammary gland duct morphogenesis            | 1 | 2 | 0.132028 | 2.41918886 |
| GO | positive regulation of response to cytokine stimulus                      | 1 | 2 | 0.132028 | 2.41918886 |
| GO | myosin light chain binding                                                | 1 | 2 | 0.132028 | 2.41918886 |
| GO | regulation of chemotaxis                                                  | 1 | 2 | 0.132028 | 2.41918886 |
| GO | Stn1-Ten1 complex                                                         | 1 | 2 | 0.132028 | 2.41918886 |
| GO | receptor recycling                                                        | 1 | 2 | 0.132028 | 2.41918886 |
| GO | positive regulation of circadian sleep/wake cycle, non-REM sleep          | 1 | 2 | 0.132028 | 2.41918886 |
| GO | stereocilia ankle link complex                                            | 1 | 2 | 0.132028 | 2.41918886 |



|                                                                     |    |     |          |            |
|---------------------------------------------------------------------|----|-----|----------|------------|
| GO actin nucleation                                                 | 1  | 2   | 0.132028 | 2.41918886 |
| GO positive regulation of secretion                                 | 1  | 2   | 0.132028 | 2.41918886 |
| GO two-component response regulator activity                        | 1  | 2   | 0.132028 | 2.41918886 |
| GO striated muscle thick filament                                   | 1  | 2   | 0.132028 | 2.41918886 |
| GO initial segment                                                  | 1  | 2   | 0.132028 | 2.41918886 |
| GO pantothenate metabolic process                                   | 1  | 2   | 0.132028 | 2.41918886 |
| GO ATPase activity, coupled to transmembrane movement of ions       | 1  | 2   | 0.132028 | 2.41918886 |
| GO adenylylsulfate kinase activity                                  | 1  | 2   | 0.132028 | 2.41918886 |
| GO sulfate adenylyltransferase (ATP) activity                       | 1  | 2   | 0.132028 | 2.41918886 |
| GO activin receptor activity                                        | 1  | 2   | 0.132028 | 2.41918886 |
| GO development of primary female sexual characteristics             | 1  | 2   | 0.132028 | 2.41918886 |
| GO positive regulation of transporter activity                      | 1  | 2   | 0.132028 | 2.41918886 |
| GO lipoteichoic acid binding                                        | 1  | 2   | 0.132028 | 2.41918886 |
| GO nicotinamide metabolic process                                   | 1  | 2   | 0.132028 | 2.41918886 |
| GO leg morphogenesis                                                | 1  | 2   | 0.132028 | 2.41918886 |
| GO 6-phosphogluconolactonase activity                               | 1  | 2   | 0.132028 | 2.41918886 |
| GO glucose-6-phosphate dehydrogenase activity                       | 1  | 2   | 0.132028 | 2.41918886 |
| GO positive regulation of cholesterol biosynthetic process          | 1  | 2   | 0.132028 | 2.41918886 |
| GO toxin transporter activity                                       | 1  | 2   | 0.132028 | 2.41918886 |
| GO regulation of skeletal muscle fiber development                  | 1  | 2   | 0.132028 | 2.41918886 |
| GO microspike assembly                                              | 1  | 2   | 0.132028 | 2.41918886 |
| GO clathrin heavy chain binding                                     | 1  | 2   | 0.132028 | 2.41918886 |
| GO positive regulation of embryonic development                     | 1  | 2   | 0.132028 | 2.41918886 |
| GO sensory organ development                                        | 1  | 2   | 0.132028 | 2.41918886 |
| GO L-ascorbate:sodium symporter activity                            | 1  | 2   | 0.132028 | 2.41918886 |
| GO L-ascorbic acid metabolic process                                | 1  | 2   | 0.132028 | 2.41918886 |
| GO L-ascorbic acid transporter activity                             | 1  | 2   | 0.132028 | 2.41918886 |
| GO L-ascorbic acid transport                                        | 1  | 2   | 0.132028 | 2.41918886 |
| GO molecular hydrogen transport                                     | 1  | 2   | 0.132028 | 2.41918886 |
| GO nucleobase transmembrane transporter activity                    | 1  | 2   | 0.132028 | 2.41918886 |
| GO nucleobase transport                                             | 1  | 2   | 0.132028 | 2.41918886 |
| GO sodium-dependent L-ascorbate transmembrane transporter activity  | 1  | 2   | 0.132028 | 2.41918886 |
| GO sodium-dependent multivitamin transmembrane transporter activity | 1  | 2   | 0.132028 | 2.41918886 |
| GO transepithelial L-ascorbic acid transport                        | 1  | 2   | 0.132028 | 2.41918886 |
| GO regulation of carbohydrate metabolic process                     | 1  | 2   | 0.132028 | 2.41918886 |
| GO respiratory gaseous exchange                                     | 4  | 29  | 0.132883 | 1.4860434  |
| GO positive regulation of ERK1 and ERK2 cascade                     | 4  | 29  | 0.132883 | 1.4860434  |
| GO negative regulation of neuron apoptosis                          | 6  | 51  | 0.133053 | 1.39702606 |
| GO male gonad development                                           | 5  | 40  | 0.135033 | 1.42134709 |
| GO regulation of signal transduction                                | 3  | 19  | 0.136536 | 1.54753841 |
| GO lipid particle                                                   | 3  | 19  | 0.136536 | 1.54753841 |
| GO protein amino acid O-linked glycosylation                        | 3  | 19  | 0.136536 | 1.54753841 |
| GO negative regulation of cell differentiation                      | 3  | 19  | 0.136536 | 1.54753841 |
| GO spleen development                                               | 3  | 19  | 0.136536 | 1.54753841 |
| GO protein heterodimerization activity                              | 18 | 199 | 0.136557 | 1.24218143 |
| GO defense response                                                 | 7  | 63  | 0.137283 | 1.34727968 |
| GO cell surface receptor linked signaling pathway                   | 15 | 161 | 0.137508 | 1.25329609 |
| GO actin binding                                                    | 24 | 278 | 0.141386 | 1.19695967 |
| GO monooxygenase activity                                           | 6  | 52  | 0.142275 | 1.34595308 |

|    |                                                                        |    |     |          |            |
|----|------------------------------------------------------------------------|----|-----|----------|------------|
| GO | central nervous system development                                     | 10 | 100 | 0.145088 | 1.25760325 |
| GO | one-carbon metabolic process                                           | 4  | 30  | 0.145537 | 1.41161573 |
| GO | response to organic nitrogen                                           | 4  | 30  | 0.145537 | 1.41161573 |
| GO | insulin receptor binding                                               | 4  | 30  | 0.145537 | 1.41161573 |
| GO | negative regulation of protein kinase activity                         | 5  | 41  | 0.145689 | 1.36159858 |
| GO | cholesterol homeostasis                                                | 5  | 41  | 0.145689 | 1.36159858 |
| GO | death receptor binding                                                 | 2  | 10  | 0.145899 | 1.65021148 |
| GO | negative regulation of ossification                                    | 2  | 10  | 0.145899 | 1.65021148 |
| GO | phagocytic vesicle membrane                                            | 2  | 10  | 0.145899 | 1.65021148 |
| GO | receptor internalization                                               | 2  | 10  | 0.145899 | 1.65021148 |
| GO | elevation of cytosolic calcium ion concentration involved in G-protein | 2  | 10  | 0.145899 | 1.65021148 |
| GO | cytoplasmic part                                                       | 2  | 10  | 0.145899 | 1.65021148 |
| GO | negative regulation of blood coagulation                               | 2  | 10  | 0.145899 | 1.65021148 |
| GO | negative regulation of hormone secretion                               | 2  | 10  | 0.145899 | 1.65021148 |
| GO | heparan sulfate proteoglycan binding                                   | 2  | 10  | 0.145899 | 1.65021148 |
| GO | vascular endothelial growth factor receptor signaling pathway          | 2  | 10  | 0.145899 | 1.65021148 |
| GO | regulation of exocytosis                                               | 2  | 10  | 0.145899 | 1.65021148 |
| GO | phosphotyrosine binding                                                | 2  | 10  | 0.145899 | 1.65021148 |
| GO | limb morphogenesis                                                     | 2  | 10  | 0.145899 | 1.65021148 |
| GO | positive regulation of glycogen biosynthetic process                   | 2  | 10  | 0.145899 | 1.65021148 |
| GO | lipoprotein binding                                                    | 2  | 10  | 0.145899 | 1.65021148 |
| GO | receptor tyrosine kinase binding                                       | 2  | 10  | 0.145899 | 1.65021148 |
| GO | transforming growth factor beta receptor binding                       | 2  | 10  | 0.145899 | 1.65021148 |
| GO | limb development                                                       | 2  | 10  | 0.145899 | 1.65021148 |
| GO | CTP biosynthetic process                                               | 2  | 10  | 0.145899 | 1.65021148 |
| GO | transforming growth factor beta binding                                | 2  | 10  | 0.145899 | 1.65021148 |
| GO | potassium ion transport                                                | 14 | 151 | 0.151483 | 1.1913065  |
| GO | GTP binding                                                            | 29 | 347 | 0.152254 | 1.13431562 |
| GO | B cell activation                                                      | 3  | 20  | 0.152923 | 1.44779831 |
| GO | positive regulation of bone mineralization                             | 3  | 20  | 0.152923 | 1.44779831 |
| GO | adult walking behavior                                                 | 3  | 20  | 0.152923 | 1.44779831 |
| GO | response to amphetamine                                                | 3  | 20  | 0.152923 | 1.44779831 |
| GO | positive regulation of mitosis                                         | 3  | 20  | 0.152923 | 1.44779831 |
| GO | positive regulation of neuron apoptosis                                | 3  | 20  | 0.152923 | 1.44779831 |
| GO | tissue regeneration                                                    | 3  | 20  | 0.152923 | 1.44779831 |
| GO | response to steroid hormone stimulus                                   | 3  | 20  | 0.152923 | 1.44779831 |
| GO | L-ascorbic acid binding                                                | 3  | 20  | 0.152923 | 1.44779831 |
| GO | actin cytoskeleton organization                                        | 11 | 114 | 0.155894 | 1.19434428 |
| GO | regulation of cell cycle                                               | 5  | 42  | 0.156692 | 1.30348792 |
| GO | calcium-dependent protein binding                                      | 4  | 31  | 0.158637 | 1.34001228 |
| GO | transcription from RNA polymerase II promoter                          | 16 | 178 | 0.159161 | 1.14416413 |
| GO | Wnt receptor signaling pathway                                         | 9  | 90  | 0.161066 | 1.19275155 |
| GO | serine-type endopeptidase inhibitor activity                           | 9  | 90  | 0.161066 | 1.19275155 |
| GO | calmodulin binding                                                     | 13 | 140 | 0.161127 | 1.15343799 |
| GO | cysteine-type endopeptidase activity                                   | 6  | 54  | 0.161563 | 1.24704217 |
| GO | protein localization                                                   | 6  | 54  | 0.161563 | 1.24704217 |
| GO | endocytosis                                                            | 10 | 103 | 0.165762 | 1.15897145 |
| GO | inner ear morphogenesis                                                | 5  | 43  | 0.168023 | 1.24692519 |
| GO | Notch signaling pathway                                                | 5  | 43  | 0.168023 | 1.24692519 |

|    |                                                             |    |     |          |            |
|----|-------------------------------------------------------------|----|-----|----------|------------|
| GO | glucose metabolic process                                   | 5  | 43  | 0.168023 | 1.24692519 |
| GO | angiogenesis                                                | 11 | 116 | 0.169161 | 1.1336167  |
| GO | synaptic transmission                                       | 15 | 167 | 0.169308 | 1.10446241 |
| GO | microsome                                                   | 19 | 219 | 0.1694   | 1.08589716 |
| GO | protein kinase inhibitor activity                           | 3  | 21  | 0.169887 | 1.3538072  |
| GO | calcium-dependent phospholipid binding                      | 3  | 21  | 0.169887 | 1.3538072  |
| GO | Wnt receptor signaling pathway, calcium modulating pathway  | 3  | 21  | 0.169887 | 1.3538072  |
| GO | threonine-type endopeptidase activity                       | 3  | 21  | 0.169887 | 1.3538072  |
| GO | polysaccharide binding                                      | 2  | 11  | 0.170604 | 1.49176904 |
| GO | morphogenesis of an epithelium                              | 2  | 11  | 0.170604 | 1.49176904 |
| GO | ceramide biosynthetic process                               | 2  | 11  | 0.170604 | 1.49176904 |
| GO | retinol binding                                             | 2  | 11  | 0.170604 | 1.49176904 |
| GO | DNA methylation involved in gamete generation               | 2  | 11  | 0.170604 | 1.49176904 |
| GO | cell recognition                                            | 2  | 11  | 0.170604 | 1.49176904 |
| GO | guanylate kinase activity                                   | 2  | 11  | 0.170604 | 1.49176904 |
| GO | T cell costimulation                                        | 2  | 11  | 0.170604 | 1.49176904 |
| GO | long-chain fatty acid-CoA ligase activity                   | 2  | 11  | 0.170604 | 1.49176904 |
| GO | regulation of blood vessel size                             | 2  | 11  | 0.170604 | 1.49176904 |
| GO | kinesin binding                                             | 2  | 11  | 0.170604 | 1.49176904 |
| GO | Rho GTPase binding                                          | 2  | 11  | 0.170604 | 1.49176904 |
| GO | positive regulation of DNA binding                          | 2  | 11  | 0.170604 | 1.49176904 |
| GO | low-density lipoprotein receptor binding                    | 2  | 11  | 0.170604 | 1.49176904 |
| GO | protein maturation by peptide bond cleavage                 | 2  | 11  | 0.170604 | 1.49176904 |
| GO | gap junction channel activity                               | 2  | 11  | 0.170604 | 1.49176904 |
| GO | laminin binding                                             | 2  | 11  | 0.170604 | 1.49176904 |
| GO | regulation of neurotransmitter secretion                    | 2  | 11  | 0.170604 | 1.49176904 |
| GO | cell volume homeostasis                                     | 2  | 11  | 0.170604 | 1.49176904 |
| GO | hemidesmosome assembly                                      | 2  | 11  | 0.170604 | 1.49176904 |
| GO | negative regulation of DNA binding                          | 2  | 11  | 0.170604 | 1.49176904 |
| GO | somatic stem cell maintenance                               | 2  | 11  | 0.170604 | 1.49176904 |
| GO | vasodilation                                                | 2  | 11  | 0.170604 | 1.49176904 |
| GO | 3',5'-cyclic-nucleotide phosphodiesterase activity          | 2  | 11  | 0.170604 | 1.49176904 |
| GO | face morphogenesis                                          | 2  | 11  | 0.170604 | 1.49176904 |
| GO | phosphatidylserine binding                                  | 2  | 11  | 0.170604 | 1.49176904 |
| GO | activin binding                                             | 2  | 11  | 0.170604 | 1.49176904 |
| GO | protein amino acid autophosphorylation                      | 8  | 79  | 0.170925 | 1.16183906 |
| GO | ossification                                                | 6  | 55  | 0.171606 | 1.19911195 |
| GO | neural tube closure                                         | 4  | 32  | 0.172152 | 1.27102323 |
| GO | regulation of transcription from RNA polymerase II promoter | 18 | 207 | 0.174813 | 1.06677146 |
| GO | response to hormone stimulus                                | 5  | 44  | 0.179664 | 1.19182747 |
| GO | cell-cell junction                                          | 6  | 56  | 0.181901 | 1.15214171 |
| GO | lysosome                                                    | 13 | 144 | 0.185812 | 1.04679907 |
| GO | JNK cascade                                                 | 4  | 33  | 0.186046 | 1.20446062 |
| GO | acrosomal vesicle                                           | 4  | 33  | 0.186046 | 1.20446062 |
| GO | T cell activation                                           | 4  | 33  | 0.186046 | 1.20446062 |
| GO | potassium channel activity                                  | 4  | 33  | 0.186046 | 1.20446062 |
| GO | determination of left/right symmetry                        | 4  | 33  | 0.186046 | 1.20446062 |
| GO | positive regulation of translation                          | 3  | 22  | 0.187358 | 1.26493749 |
| GO | multicellular organism growth                               | 3  | 22  | 0.187358 | 1.26493749 |

|    |                                                                          |   |    |          |            |
|----|--------------------------------------------------------------------------|---|----|----------|------------|
| GO | positive regulation of neuron differentiation                            | 3 | 22 | 0.187358 | 1.26493749 |
| GO | mesoderm formation                                                       | 3 | 22 | 0.187358 | 1.26493749 |
| GO | regulation of ubiquitin-protein ligase activity                          | 1 | 3  | 0.191359 | 1.81892509 |
| GO | progesterone metabolic process                                           | 1 | 3  | 0.191359 | 1.81892509 |
| GO | double-stranded RNA adenosine deaminase activity                         | 1 | 3  | 0.191359 | 1.81892509 |
| GO | polo kinase kinase activity                                              | 1 | 3  | 0.191359 | 1.81892509 |
| GO | negative regulation of myelination                                       | 1 | 3  | 0.191359 | 1.81892509 |
| GO | heme transporter activity                                                | 1 | 3  | 0.191359 | 1.81892509 |
| GO | cellular chloride ion homeostasis                                        | 1 | 3  | 0.191359 | 1.81892509 |
| GO | creatine kinase activity                                                 | 1 | 3  | 0.191359 | 1.81892509 |
| GO | regulation of protein export from nucleus                                | 1 | 3  | 0.191359 | 1.81892509 |
| GO | sphingosine metabolic process                                            | 1 | 3  | 0.191359 | 1.81892509 |
| GO | kininogen binding                                                        | 1 | 3  | 0.191359 | 1.81892509 |
| GO | response to interleukin-4                                                | 1 | 3  | 0.191359 | 1.81892509 |
| GO | adenylate cyclase binding                                                | 1 | 3  | 0.191359 | 1.81892509 |
| GO | desensitization of G-protein coupled receptor protein signaling pathway  | 1 | 3  | 0.191359 | 1.81892509 |
| GO | diet induced thermogenesis                                               | 1 | 3  | 0.191359 | 1.81892509 |
| GO | norepinephrine binding                                                   | 1 | 3  | 0.191359 | 1.81892509 |
| GO | organic acid metabolic process                                           | 1 | 3  | 0.191359 | 1.81892509 |
| GO | oxidoreductase activity, acting on paired donors, with incorporation of  | 1 | 3  | 0.191359 | 1.81892509 |
| GO | Gram-negative bacterial cell surface binding                             | 1 | 3  | 0.191359 | 1.81892509 |
| GO | regulation of cell-cell adhesion mediated by integrin                    | 1 | 3  | 0.191359 | 1.81892509 |
| GO | branching morphogenesis of a nerve                                       | 1 | 3  | 0.191359 | 1.81892509 |
| GO | ovarian follicle rupture                                                 | 1 | 3  | 0.191359 | 1.81892509 |
| GO | regulation of natriuresis                                                | 1 | 3  | 0.191359 | 1.81892509 |
| GO | regulation of norepinephrine secretion                                   | 1 | 3  | 0.191359 | 1.81892509 |
| GO | endothelin B receptor binding                                            | 1 | 3  | 0.191359 | 1.81892509 |
| GO | rhombomere 3 development                                                 | 1 | 3  | 0.191359 | 1.81892509 |
| GO | regulation of blood vessel endothelial cell migration                    | 1 | 3  | 0.191359 | 1.81892509 |
| GO | N-terminal peptidyl-lysine acetylation                                   | 1 | 3  | 0.191359 | 1.81892509 |
| GO | positive regulation of protein import into nucleus, translocation        | 1 | 3  | 0.191359 | 1.81892509 |
| GO | age-dependent response to oxidative stress                               | 1 | 3  | 0.191359 | 1.81892509 |
| GO | macrophage activation during immune response                             | 1 | 3  | 0.191359 | 1.81892509 |
| GO | transforming growth factor beta receptor complex assembly                | 1 | 3  | 0.191359 | 1.81892509 |
| GO | adenosylhomocysteinase activity                                          | 1 | 3  | 0.191359 | 1.81892509 |
| GO | conditioned taste aversion                                               | 1 | 3  | 0.191359 | 1.81892509 |
| GO | 3-galactosyl-N-acetylglucosaminide 4-alpha-L-fucosyltransferase activity | 1 | 3  | 0.191359 | 1.81892509 |
| GO | apolipoprotein receptor binding                                          | 1 | 3  | 0.191359 | 1.81892509 |
| GO | positive regulation of receptor internalization                          | 1 | 3  | 0.191359 | 1.81892509 |
| GO | very-low-density lipoprotein receptor binding                            | 1 | 3  | 0.191359 | 1.81892509 |
| GO | phosphatidylserine metabolic process                                     | 1 | 3  | 0.191359 | 1.81892509 |
| GO | protein amino acid O-linked glycosylation via serine                     | 1 | 3  | 0.191359 | 1.81892509 |
| GO | protein amino acid O-linked glycosylation via threonine                  | 1 | 3  | 0.191359 | 1.81892509 |
| GO | heparin biosynthetic process                                             | 1 | 3  | 0.191359 | 1.81892509 |
| GO | cerebral cortex tangential migration                                     | 1 | 3  | 0.191359 | 1.81892509 |
| GO | AMP deaminase activity                                                   | 1 | 3  | 0.191359 | 1.81892509 |
| GO | forebrain dorsal/ventral pattern formation                               | 1 | 3  | 0.191359 | 1.81892509 |
| GO | smoothened signaling pathway involved in dorsal/ventral neural tube      | 1 | 3  | 0.191359 | 1.81892509 |
| GO | tube development                                                         | 1 | 3  | 0.191359 | 1.81892509 |

|    |                                                                         |   |   |          |            |
|----|-------------------------------------------------------------------------|---|---|----------|------------|
| GO | activation of phospholipase C activity by muscarinic acetylcholine rece | 1 | 3 | 0.191359 | 1.81892509 |
| GO | bone development                                                        | 1 | 3 | 0.191359 | 1.81892509 |
| GO | beta-glucuronidase activity                                             | 1 | 3 | 0.191359 | 1.81892509 |
| GO | cilium axoneme assembly                                                 | 1 | 3 | 0.191359 | 1.81892509 |
| GO | myoblast proliferation                                                  | 1 | 3 | 0.191359 | 1.81892509 |
| GO | negative regulation of androgen receptor signaling pathway              | 1 | 3 | 0.191359 | 1.81892509 |
| GO | negative regulation of smooth muscle cell apoptosis                     | 1 | 3 | 0.191359 | 1.81892509 |
| GO | Type II pneumocyte differentiation                                      | 1 | 3 | 0.191359 | 1.81892509 |
| GO | skeletal muscle tissue growth                                           | 1 | 3 | 0.191359 | 1.81892509 |
| GO | interleukin-2 receptor activity                                         | 1 | 3 | 0.191359 | 1.81892509 |
| GO | negative regulation of chemokine biosynthetic process                   | 1 | 3 | 0.191359 | 1.81892509 |
| GO | cellular response to cAMP                                               | 1 | 3 | 0.191359 | 1.81892509 |
| GO | cellular response to retinoic acid                                      | 1 | 3 | 0.191359 | 1.81892509 |
| GO | cellular response to stress                                             | 1 | 3 | 0.191359 | 1.81892509 |
| GO | glycerol transport                                                      | 1 | 3 | 0.191359 | 1.81892509 |
| GO | multicellular organismal water homeostasis                              | 1 | 3 | 0.191359 | 1.81892509 |
| GO | potassium ion transmembrane transporter activity                        | 1 | 3 | 0.191359 | 1.81892509 |
| GO | insulin receptor complex                                                | 1 | 3 | 0.191359 | 1.81892509 |
| GO | PTB domain binding                                                      | 1 | 3 | 0.191359 | 1.81892509 |
| GO | CD8-positive, alpha-beta T cell differentiation                         | 1 | 3 | 0.191359 | 1.81892509 |
| GO | alphav-beta3 integrin-vitronectin complex                               | 1 | 3 | 0.191359 | 1.81892509 |
| GO | vascular endothelial growth factor receptor 2 binding                   | 1 | 3 | 0.191359 | 1.81892509 |
| GO | inositol 1,4,5-trisphosphate-sensitive calcium-release channel activity | 1 | 3 | 0.191359 | 1.81892509 |
| GO | inositol-1,4,5-trisphosphate receptor activity                          | 1 | 3 | 0.191359 | 1.81892509 |
| GO | osteoblast proliferation                                                | 1 | 3 | 0.191359 | 1.81892509 |
| GO | positive regulation of transcription from RNA polymerase II promoter,   | 1 | 3 | 0.191359 | 1.81892509 |
| GO | clustering of voltage-gated sodium channels                             | 1 | 3 | 0.191359 | 1.81892509 |
| GO | neurotransmitter receptor metabolic process                             | 1 | 3 | 0.191359 | 1.81892509 |
| GO | small conductance calcium-activated potassium channel activity          | 1 | 3 | 0.191359 | 1.81892509 |
| GO | myeloid progenitor cell differentiation                                 | 1 | 3 | 0.191359 | 1.81892509 |
| GO | positive regulation of long-term neuronal synaptic plasticity           | 1 | 3 | 0.191359 | 1.81892509 |
| GO | laminin-10 complex                                                      | 1 | 3 | 0.191359 | 1.81892509 |
| GO | negative regulation of stress fiber assembly                            | 1 | 3 | 0.191359 | 1.81892509 |
| GO | IgE binding                                                             | 1 | 3 | 0.191359 | 1.81892509 |
| GO | actinin binding                                                         | 1 | 3 | 0.191359 | 1.81892509 |
| GO | elastic fiber assembly                                                  | 1 | 3 | 0.191359 | 1.81892509 |
| GO | activin responsive factor complex                                       | 1 | 3 | 0.191359 | 1.81892509 |
| GO | zygotic specification of dorsal/ventral axis                            | 1 | 3 | 0.191359 | 1.81892509 |
| GO | negative regulation of epithelial cell migration                        | 1 | 3 | 0.191359 | 1.81892509 |
| GO | somite specification                                                    | 1 | 3 | 0.191359 | 1.81892509 |
| GO | positive regulation of melanocyte differentiation                       | 1 | 3 | 0.191359 | 1.81892509 |
| GO | stem cell factor receptor binding                                       | 1 | 3 | 0.191359 | 1.81892509 |
| GO | spinal cord oligodendrocyte cell fate specification                     | 1 | 3 | 0.191359 | 1.81892509 |
| GO | myosin light chain kinase activity                                      | 1 | 3 | 0.191359 | 1.81892509 |
| GO | ionotropic glutamate receptor binding                                   | 1 | 3 | 0.191359 | 1.81892509 |
| GO | axon extension involved in development                                  | 1 | 3 | 0.191359 | 1.81892509 |
| GO | I-kappaB/NF-kappaB complex                                              | 1 | 3 | 0.191359 | 1.81892509 |
| GO | regulation of NF-kappaB import into nucleus                             | 1 | 3 | 0.191359 | 1.81892509 |
| GO | multicellular organismal response to stress                             | 1 | 3 | 0.191359 | 1.81892509 |

|    |                                                                   |   |   |          |            |
|----|-------------------------------------------------------------------|---|---|----------|------------|
| GO | negative regulation of calcium ion transport into cytosol         | 1 | 3 | 0.191359 | 1.81892509 |
| GO | nitric-oxide synthase activity                                    | 1 | 3 | 0.191359 | 1.81892509 |
| GO | tetrahydrobiopterin binding                                       | 1 | 3 | 0.191359 | 1.81892509 |
| GO | neurotrophin binding                                              | 1 | 3 | 0.191359 | 1.81892509 |
| GO | phenylalanine 4-monooxygenase activity                            | 1 | 3 | 0.191359 | 1.81892509 |
| GO | rRNA methyltransferase activity                                   | 1 | 3 | 0.191359 | 1.81892509 |
| GO | rRNA modification                                                 | 1 | 3 | 0.191359 | 1.81892509 |
| GO | calmodulin-dependent cyclic-nucleotide phosphodiesterase activity | 1 | 3 | 0.191359 | 1.81892509 |
| GO | cell-substrate junction                                           | 1 | 3 | 0.191359 | 1.81892509 |
| GO | growth hormone receptor signaling pathway                         | 1 | 3 | 0.191359 | 1.81892509 |
| GO | phosphoinositide 3-kinase regulator activity                      | 1 | 3 | 0.191359 | 1.81892509 |
| GO | smooth muscle cell migration                                      | 1 | 3 | 0.191359 | 1.81892509 |
| GO | procollagen-lysine 5-dioxygenase activity                         | 1 | 3 | 0.191359 | 1.81892509 |
| GO | centrosome localization                                           | 1 | 3 | 0.191359 | 1.81892509 |
| GO | limb bud formation                                                | 1 | 3 | 0.191359 | 1.81892509 |
| GO | negative regulation of synaptic transmission, dopaminergic        | 1 | 3 | 0.191359 | 1.81892509 |
| GO | positive regulation of circadian sleep/wake cycle, REM sleep      | 1 | 3 | 0.191359 | 1.81892509 |
| GO | cobalt ion binding                                                | 1 | 3 | 0.191359 | 1.81892509 |
| GO | mesenchymal to epithelial transition                              | 1 | 3 | 0.191359 | 1.81892509 |
| GO | tertiary branching involved in mammary gland duct morphogenesis   | 1 | 3 | 0.191359 | 1.81892509 |
| GO | miRNA binding                                                     | 1 | 3 | 0.191359 | 1.81892509 |
| GO | response to nematode                                              | 1 | 3 | 0.191359 | 1.81892509 |
| GO | DNA damage induced protein phosphorylation                        | 1 | 3 | 0.191359 | 1.81892509 |
| GO | inorganic phosphate transmembrane transporter activity            | 1 | 3 | 0.191359 | 1.81892509 |
| GO | outer membrane                                                    | 1 | 3 | 0.191359 | 1.81892509 |
| GO | intracellular calcium activated chloride channel activity         | 1 | 3 | 0.191359 | 1.81892509 |
| GO | reduction of food intake in response to dietary excess            | 1 | 3 | 0.191359 | 1.81892509 |
| GO | activation of Ral GTPase activity                                 | 1 | 3 | 0.191359 | 1.81892509 |
| GO | Ral GTPase activator activity                                     | 1 | 3 | 0.191359 | 1.81892509 |
| GO | platelet activating factor receptor activity                      | 1 | 3 | 0.191359 | 1.81892509 |
| GO | chaperone cofactor-dependent protein refolding                    | 1 | 3 | 0.191359 | 1.81892509 |
| GO | somatic diversification of immunoglobulins                        | 1 | 3 | 0.191359 | 1.81892509 |
| GO | cyclooxygenase pathway                                            | 1 | 3 | 0.191359 | 1.81892509 |
| GO | uterus development                                                | 1 | 3 | 0.191359 | 1.81892509 |
| GO | midgut development                                                | 1 | 3 | 0.191359 | 1.81892509 |
| GO | retinoid-X receptor activity                                      | 1 | 3 | 0.191359 | 1.81892509 |
| GO | ventricular cardiac muscle cell differentiation                   | 1 | 3 | 0.191359 | 1.81892509 |
| GO | vitamin D response element binding                                | 1 | 3 | 0.191359 | 1.81892509 |
| GO | regulation of retinal cell programmed cell death                  | 1 | 3 | 0.191359 | 1.81892509 |
| GO | detection of biotic stimulus                                      | 1 | 3 | 0.191359 | 1.81892509 |
| GO | innate immune response in mucosa                                  | 1 | 3 | 0.191359 | 1.81892509 |
| GO | positive regulation of interleukin-17 production                  | 1 | 3 | 0.191359 | 1.81892509 |
| GO | beta-galactoside alpha-2,3-sialyltransferase activity             | 1 | 3 | 0.191359 | 1.81892509 |
| GO | cellular response to water deprivation                            | 1 | 3 | 0.191359 | 1.81892509 |
| GO | Rap GTPase activator activity                                     | 1 | 3 | 0.191359 | 1.81892509 |
| GO | D-aspartate import                                                | 1 | 3 | 0.191359 | 1.81892509 |
| GO | endocardial cushion development                                   | 1 | 3 | 0.191359 | 1.81892509 |
| GO | positive regulation of cartilage development                      | 1 | 3 | 0.191359 | 1.81892509 |
| GO | prostate gland morphogenesis                                      | 1 | 3 | 0.191359 | 1.81892509 |

|                                                                            |   |   |          |            |
|----------------------------------------------------------------------------|---|---|----------|------------|
| GO renal system process                                                    | 1 | 3 | 0.191359 | 1.81892509 |
| GO specification of organ position                                         | 1 | 3 | 0.191359 | 1.81892509 |
| GO trachea development                                                     | 1 | 3 | 0.191359 | 1.81892509 |
| GO protein anchor                                                          | 1 | 3 | 0.191359 | 1.81892509 |
| GO basic amino acid transmembrane transporter activity                     | 1 | 3 | 0.191359 | 1.81892509 |
| GO mitochondrial ATP synthesis coupled electron transport                  | 1 | 3 | 0.191359 | 1.81892509 |
| GO negative regulation of histone acetylation                              | 1 | 3 | 0.191359 | 1.81892509 |
| GO positive regulation of neurotransmitter secretion                       | 1 | 3 | 0.191359 | 1.81892509 |
| GO intrinsic to internal side of plasma membrane                           | 1 | 3 | 0.191359 | 1.81892509 |
| GO clathrin sculpted acetylcholine transport vesicle membrane              | 1 | 3 | 0.191359 | 1.81892509 |
| GO thioredoxin peroxidase activity                                         | 1 | 3 | 0.191359 | 1.81892509 |
| GO cardiac epithelial to mesenchymal transition                            | 1 | 3 | 0.191359 | 1.81892509 |
| GO inhibin-betaglycan-ActRII complex                                       | 1 | 3 | 0.191359 | 1.81892509 |
| GO response to molecule of fungal origin                                   | 1 | 3 | 0.191359 | 1.81892509 |
| GO detection of lipopolysaccharide                                         | 1 | 3 | 0.191359 | 1.81892509 |
| GO positive regulation of interferon-alpha production                      | 1 | 3 | 0.191359 | 1.81892509 |
| GO myofibril assembly                                                      | 1 | 3 | 0.191359 | 1.81892509 |
| GO granulosa cell differentiation                                          | 1 | 3 | 0.191359 | 1.81892509 |
| GO cellular response to calcium ion                                        | 1 | 3 | 0.191359 | 1.81892509 |
| GO epithelial cell proliferation involved in mammary gland duct elongation | 1 | 3 | 0.191359 | 1.81892509 |
| GO frizzled binding                                                        | 1 | 3 | 0.191359 | 1.81892509 |
| GO positive regulation of protein kinase C signaling cascade               | 1 | 3 | 0.191359 | 1.81892509 |
| GO positive regulation of T cell chemotaxis                                | 1 | 3 | 0.191359 | 1.81892509 |
| GO regulation of branching involved in mammary gland duct morphogenesis    | 1 | 3 | 0.191359 | 1.81892509 |
| GO acetate-CoA ligase activity                                             | 1 | 3 | 0.191359 | 1.81892509 |
| GO calcitonin receptor activity                                            | 1 | 3 | 0.191359 | 1.81892509 |
| GO microtubule-based flagellum part                                        | 1 | 3 | 0.191359 | 1.81892509 |
| GO positive regulation of interleukin-1 alpha secretion                    | 1 | 3 | 0.191359 | 1.81892509 |
| GO inner ear receptor stereocilium organization                            | 1 | 3 | 0.191359 | 1.81892509 |
| GO fibroblast migration                                                    | 1 | 3 | 0.191359 | 1.81892509 |
| GO peptide transporter activity                                            | 1 | 3 | 0.191359 | 1.81892509 |
| GO peptide transport                                                       | 1 | 3 | 0.191359 | 1.81892509 |
| GO diacylglycerol metabolic process                                        | 1 | 3 | 0.191359 | 1.81892509 |
| GO second-messenger-mediated signaling                                     | 1 | 3 | 0.191359 | 1.81892509 |
| GO positive regulation of megakaryocyte differentiation                    | 1 | 3 | 0.191359 | 1.81892509 |
| GO syndecan binding                                                        | 1 | 3 | 0.191359 | 1.81892509 |
| GO sodium:bicarbonate symporter activity                                   | 1 | 3 | 0.191359 | 1.81892509 |
| GO axon hillock                                                            | 1 | 3 | 0.191359 | 1.81892509 |
| GO pantetheine hydrolase activity                                          | 1 | 3 | 0.191359 | 1.81892509 |
| GO spongiotrophoblast differentiation                                      | 1 | 3 | 0.191359 | 1.81892509 |
| GO sulfate assimilation                                                    | 1 | 3 | 0.191359 | 1.81892509 |
| GO regulation of actin polymerization or depolymerization                  | 1 | 3 | 0.191359 | 1.81892509 |
| GO positive regulation of activin receptor signaling pathway               | 1 | 3 | 0.191359 | 1.81892509 |
| GO phosphatidylinositol-4-phosphate binding                                | 1 | 3 | 0.191359 | 1.81892509 |
| GO transforming growth factor beta receptor activity, type I               | 1 | 3 | 0.191359 | 1.81892509 |
| GO intrinsic to Golgi membrane                                             | 1 | 3 | 0.191359 | 1.81892509 |
| GO NAD+ nucleosidase activity                                              | 1 | 3 | 0.191359 | 1.81892509 |
| GO histone H3 deacetylation                                                | 1 | 3 | 0.191359 | 1.81892509 |
| GO histone H4 deacetylation                                                | 1 | 3 | 0.191359 | 1.81892509 |

|                                                                             |    |     |          |            |
|-----------------------------------------------------------------------------|----|-----|----------|------------|
| GO rhombomere 5 development                                                 | 1  | 3   | 0.191359 | 1.81892509 |
| GO receptor binding                                                         | 18 | 211 | 0.195819 | 0.9817225  |
| GO cholesterol transport                                                    | 2  | 12  | 0.195923 | 1.35008603 |
| GO Rac GTPase binding                                                       | 2  | 12  | 0.195923 | 1.35008603 |
| GO microvillus membrane                                                     | 2  | 12  | 0.195923 | 1.35008603 |
| GO keratinocyte proliferation                                               | 2  | 12  | 0.195923 | 1.35008603 |
| GO positive regulation of macrophage derived foam cell differentiation      | 2  | 12  | 0.195923 | 1.35008603 |
| GO lysosphingolipid and lysophosphatidic acid receptor activity             | 2  | 12  | 0.195923 | 1.35008603 |
| GO neuromuscular synaptic transmission                                      | 2  | 12  | 0.195923 | 1.35008603 |
| GO eye photoreceptor cell development                                       | 2  | 12  | 0.195923 | 1.35008603 |
| GO positive regulation of caspase activity                                  | 2  | 12  | 0.195923 | 1.35008603 |
| GO tissue homeostasis                                                       | 2  | 12  | 0.195923 | 1.35008603 |
| GO insulin receptor substrate binding                                       | 2  | 12  | 0.195923 | 1.35008603 |
| GO low-density lipoprotein particle                                         | 2  | 12  | 0.195923 | 1.35008603 |
| GO melanocyte differentiation                                               | 2  | 12  | 0.195923 | 1.35008603 |
| GO positive regulation of calcium ion transport                             | 2  | 12  | 0.195923 | 1.35008603 |
| GO retinoic acid receptor signaling pathway                                 | 2  | 12  | 0.195923 | 1.35008603 |
| GO positive regulation of stress-activated MAPK cascade                     | 2  | 12  | 0.195923 | 1.35008603 |
| GO anion transmembrane transporter activity                                 | 2  | 12  | 0.195923 | 1.35008603 |
| GO caspase inhibitor activity                                               | 2  | 12  | 0.195923 | 1.35008603 |
| GO protein tyrosine phosphatase activity                                    | 8  | 82  | 0.19678  | 1.05055361 |
| GO positive regulation of transcription                                     | 13 | 146 | 0.198792 | 0.99465529 |
| GO sulfotransferase activity                                                | 4  | 34  | 0.200287 | 1.14015543 |
| GO PML body                                                                 | 4  | 34  | 0.200287 | 1.14015543 |
| GO activation of protein kinase C activity by G-protein coupled receptor pi | 4  | 34  | 0.200287 | 1.14015543 |
| GO humoral immune response                                                  | 4  | 34  | 0.200287 | 1.14015543 |
| GO response to calcium ion                                                  | 5  | 46  | 0.203796 | 1.08572624 |
| GO Z disc                                                                   | 5  | 46  | 0.203796 | 1.08572624 |
| GO regulation of ARF GTPase activity                                        | 3  | 23  | 0.205263 | 1.180656   |
| GO developmental growth                                                     | 3  | 23  | 0.205263 | 1.180656   |
| GO neuromuscular process controlling balance                                | 3  | 23  | 0.205263 | 1.180656   |
| GO cell maturation                                                          | 3  | 23  | 0.205263 | 1.180656   |
| GO positive regulation of osteoblast differentiation                        | 3  | 23  | 0.205263 | 1.180656   |
| GO steroid binding                                                          | 3  | 23  | 0.205263 | 1.180656   |
| GO positive regulation of insulin secretion                                 | 3  | 23  | 0.205263 | 1.180656   |
| GO neurotransmitter secretion                                               | 3  | 23  | 0.205263 | 1.180656   |
| GO blood coagulation                                                        | 7  | 71  | 0.210379 | 1.01174538 |
| GO FAD binding                                                              | 7  | 71  | 0.210379 | 1.01174538 |
| GO positive regulation of transcription, DNA-dependent                      | 11 | 122 | 0.212029 | 0.95796191 |
| GO organ regeneration                                                       | 4  | 35  | 0.21484  | 1.07795524 |
| GO embryonic limb morphogenesis                                             | 4  | 35  | 0.21484  | 1.07795524 |
| GO extracellular matrix                                                     | 4  | 35  | 0.21484  | 1.07795524 |
| GO binding                                                                  | 39 | 500 | 0.215673 | 0.86673618 |
| GO hydrolase activity, acting on acid anhydrides, catalyzing transmembran   | 5  | 47  | 0.216247 | 1.03458604 |
| GO SH3 domain binding                                                       | 9  | 97  | 0.217539 | 0.95612469 |
| GO heme binding                                                             | 10 | 110 | 0.218999 | 0.94040082 |
| GO transferase activity, transferring glycosyl groups                       | 13 | 149 | 0.219003 | 0.91784064 |
| GO response to nutrient                                                     | 7  | 72  | 0.220401 | 0.97274096 |
| GO histone deacetylase activity                                             | 2  | 13  | 0.221658 | 1.22200951 |



|                                                                            |    |     |          |            |
|----------------------------------------------------------------------------|----|-----|----------|------------|
| GO bone mineralization                                                     | 2  | 13  | 0.221658 | 1.22200951 |
| GO induction of an organ                                                   | 2  | 13  | 0.221658 | 1.22200951 |
| GO positive regulation of actin filament polymerization                    | 2  | 13  | 0.221658 | 1.22200951 |
| GO superoxide metabolic process                                            | 2  | 13  | 0.221658 | 1.22200951 |
| GO acetylcholine receptor activity                                         | 2  | 13  | 0.221658 | 1.22200951 |
| GO lipid storage                                                           | 2  | 13  | 0.221658 | 1.22200951 |
| GO carboxypeptidase activity                                               | 2  | 13  | 0.221658 | 1.22200951 |
| GO positive regulation of phosphoinositide 3-kinase cascade                | 2  | 13  | 0.221658 | 1.22200951 |
| GO middle ear morphogenesis                                                | 2  | 13  | 0.221658 | 1.22200951 |
| GO positive regulation of smooth muscle contraction                        | 2  | 13  | 0.221658 | 1.22200951 |
| GO negative regulation of proteolysis                                      | 2  | 13  | 0.221658 | 1.22200951 |
| GO positive regulation vascular endothelial growth factor production       | 2  | 13  | 0.221658 | 1.22200951 |
| GO camera-type eye morphogenesis                                           | 2  | 13  | 0.221658 | 1.22200951 |
| GO negative regulation of fat cell differentiation                         | 2  | 13  | 0.221658 | 1.22200951 |
| GO labyrinthine layer blood vessel development                             | 2  | 13  | 0.221658 | 1.22200951 |
| GO MAP kinase kinase activity                                              | 2  | 13  | 0.221658 | 1.22200951 |
| GO RNA catabolic process                                                   | 2  | 13  | 0.221658 | 1.22200951 |
| GO synaptic transmission, glutamatergic                                    | 2  | 13  | 0.221658 | 1.22200951 |
| GO oogenesis                                                               | 2  | 13  | 0.221658 | 1.22200951 |
| GO protein targeting to membrane                                           | 2  | 13  | 0.221658 | 1.22200951 |
| GO T cell proliferation                                                    | 2  | 13  | 0.221658 | 1.22200951 |
| GO ARF GTPase activator activity                                           | 3  | 24  | 0.223535 | 1.10050625 |
| GO G-protein signaling, coupled to cAMP nucleotide second messenger        | 3  | 24  | 0.223535 | 1.10050625 |
| GO negative regulation of inflammatory response                            | 3  | 24  | 0.223535 | 1.10050625 |
| GO visual learning                                                         | 3  | 24  | 0.223535 | 1.10050625 |
| GO lung alveolus development                                               | 3  | 24  | 0.223535 | 1.10050625 |
| GO response to gamma radiation                                             | 3  | 24  | 0.223535 | 1.10050625 |
| GO learning                                                                | 3  | 24  | 0.223535 | 1.10050625 |
| GO proteolysis involved in cellular protein catabolic process              | 3  | 24  | 0.223535 | 1.10050625 |
| GO fatty acid biosynthetic process                                         | 5  | 48  | 0.228927 | 0.9846364  |
| GO phosphoprotein phosphatase activity                                     | 4  | 36  | 0.229671 | 1.0177221  |
| GO somitogenesis                                                           | 4  | 36  | 0.229671 | 1.0177221  |
| GO response to organic substance                                           | 4  | 36  | 0.229671 | 1.0177221  |
| GO response to stress                                                      | 10 | 112 | 0.235344 | 0.88067891 |
| GO female pregnancy                                                        | 6  | 61  | 0.236676 | 0.93038753 |
| GO phospholipid biosynthetic process                                       | 5  | 49  | 0.241816 | 0.93582048 |
| GO wound healing                                                           | 5  | 49  | 0.241816 | 0.93582048 |
| GO metalloproteinase activity                                              | 3  | 25  | 0.242107 | 1.0240947  |
| GO protein phosphatase binding                                             | 3  | 25  | 0.242107 | 1.0240947  |
| GO leukocyte cell-cell adhesion                                            | 3  | 25  | 0.242107 | 1.0240947  |
| GO symporter activity                                                      | 10 | 113 | 0.243681 | 0.85124131 |
| GO activation of adenylate cyclase activity by G-protein signaling pathway | 4  | 37  | 0.244745 | 0.95933085 |
| GO protein amino acid sulfation                                            | 1  | 4   | 0.246637 | 1.4398387  |
| GO CTD phosphatase activity                                                | 1  | 4   | 0.246637 | 1.4398387  |
| GO branching involved in prostate gland morphogenesis                      | 1  | 4   | 0.246637 | 1.4398387  |
| GO 9-cis-retinoic acid biosynthetic process                                | 1  | 4   | 0.246637 | 1.4398387  |
| GO base conversion or substitution editing                                 | 1  | 4   | 0.246637 | 1.4398387  |
| GO regulation of respiratory burst                                         | 1  | 4   | 0.246637 | 1.4398387  |
| GO cellular glucose homeostasis                                            | 1  | 4   | 0.246637 | 1.4398387  |

|    |                                                                     |   |   |          |           |
|----|---------------------------------------------------------------------|---|---|----------|-----------|
| GO | positive regulation of histone acetylation                          | 1 | 4 | 0.246637 | 1.4398387 |
| GO | DNA damage response, signal transduction                            | 1 | 4 | 0.246637 | 1.4398387 |
| GO | mammary duct terminal end bud growth                                | 1 | 4 | 0.246637 | 1.4398387 |
| GO | piP-body                                                            | 1 | 4 | 0.246637 | 1.4398387 |
| GO | negative regulation of peptidase activity                           | 1 | 4 | 0.246637 | 1.4398387 |
| GO | heterocycle metabolic process                                       | 1 | 4 | 0.246637 | 1.4398387 |
| GO | nose development                                                    | 1 | 4 | 0.246637 | 1.4398387 |
| GO | sphingomyelin biosynthetic process                                  | 1 | 4 | 0.246637 | 1.4398387 |
| GO | zymogen granule membrane                                            | 1 | 4 | 0.246637 | 1.4398387 |
| GO | regulation of cAMP metabolic process                                | 1 | 4 | 0.246637 | 1.4398387 |
| GO | regulation of dopamine uptake                                       | 1 | 4 | 0.246637 | 1.4398387 |
| GO | positive regulation of kinase activity                              | 1 | 4 | 0.246637 | 1.4398387 |
| GO | JUN kinase binding                                                  | 1 | 4 | 0.246637 | 1.4398387 |
| GO | toxin metabolic process                                             | 1 | 4 | 0.246637 | 1.4398387 |
| GO | astrocyte activation                                                | 1 | 4 | 0.246637 | 1.4398387 |
| GO | peptide hormone secretion                                           | 1 | 4 | 0.246637 | 1.4398387 |
| GO | positive regulation of cell size                                    | 1 | 4 | 0.246637 | 1.4398387 |
| GO | vein smooth muscle contraction                                      | 1 | 4 | 0.246637 | 1.4398387 |
| GO | eukaryotic translation elongation factor 1 complex                  | 1 | 4 | 0.246637 | 1.4398387 |
| GO | facial nerve structural organization                                | 1 | 4 | 0.246637 | 1.4398387 |
| GO | Schwann cell differentiation                                        | 1 | 4 | 0.246637 | 1.4398387 |
| GO | phosphopyruvate hydratase activity                                  | 1 | 4 | 0.246637 | 1.4398387 |
| GO | phosphopyruvate hydratase complex                                   | 1 | 4 | 0.246637 | 1.4398387 |
| GO | peroxisome proliferator activated receptor binding                  | 1 | 4 | 0.246637 | 1.4398387 |
| GO | response to cobalt ion                                              | 1 | 4 | 0.246637 | 1.4398387 |
| GO | histone demethylase activity (H3-K9 specific)                       | 1 | 4 | 0.246637 | 1.4398387 |
| GO | cAMP response element binding protein binding                       | 1 | 4 | 0.246637 | 1.4398387 |
| GO | lipoxygenase pathway                                                | 1 | 4 | 0.246637 | 1.4398387 |
| GO | inner ear receptor cell differentiation                             | 1 | 4 | 0.246637 | 1.4398387 |
| GO | cerebral cortex radially oriented cell migration                    | 1 | 4 | 0.246637 | 1.4398387 |
| GO | forebrain neuron development                                        | 1 | 4 | 0.246637 | 1.4398387 |
| GO | NADP metabolic process                                              | 1 | 4 | 0.246637 | 1.4398387 |
| GO | regulation of systemic arterial blood pressure by renin-angiotensin | 1 | 4 | 0.246637 | 1.4398387 |
| GO | optic nerve morphogenesis                                           | 1 | 4 | 0.246637 | 1.4398387 |
| GO | positive regulation of T-helper 1 cell differentiation              | 1 | 4 | 0.246637 | 1.4398387 |
| GO | positive regulation of estrogen receptor signaling pathway          | 1 | 4 | 0.246637 | 1.4398387 |
| GO | testosterone 17-beta-dehydrogenase activity                         | 1 | 4 | 0.246637 | 1.4398387 |
| GO | chondroitin sulfate proteoglycan biosynthetic process               | 1 | 4 | 0.246637 | 1.4398387 |
| GO | lung lobe morphogenesis                                             | 1 | 4 | 0.246637 | 1.4398387 |
| GO | positive regulation of granule cell precursor proliferation         | 1 | 4 | 0.246637 | 1.4398387 |
| GO | water homeostasis                                                   | 1 | 4 | 0.246637 | 1.4398387 |
| GO | ciliary neurotrophic factor receptor activity                       | 1 | 4 | 0.246637 | 1.4398387 |
| GO | lateral ventricle development                                       | 1 | 4 | 0.246637 | 1.4398387 |
| GO | insulin-like growth factor II binding                               | 1 | 4 | 0.246637 | 1.4398387 |
| GO | regulation of gene-specific transcription                           | 1 | 4 | 0.246637 | 1.4398387 |
| GO | cell-cell adhesion mediated by integrin                             | 1 | 4 | 0.246637 | 1.4398387 |
| GO | cell-substrate junction assembly                                    | 1 | 4 | 0.246637 | 1.4398387 |
| GO | calcium ion transmembrane transporter activity                      | 1 | 4 | 0.246637 | 1.4398387 |
| GO | platelet dense tubular network membrane                             | 1 | 4 | 0.246637 | 1.4398387 |

|    |                                                                       |   |   |          |           |
|----|-----------------------------------------------------------------------|---|---|----------|-----------|
| GO | positive regulation by host of viral transcription                    | 1 | 4 | 0.246637 | 1.4398387 |
| GO | saliva secretion                                                      | 1 | 4 | 0.246637 | 1.4398387 |
| GO | myeloid leukocyte differentiation                                     | 1 | 4 | 0.246637 | 1.4398387 |
| GO | positive regulation of Rac protein signal transduction                | 1 | 4 | 0.246637 | 1.4398387 |
| GO | response to mineralocorticoid stimulus                                | 1 | 4 | 0.246637 | 1.4398387 |
| GO | very-low-density lipoprotein receptor activity                        | 1 | 4 | 0.246637 | 1.4398387 |
| GO | dopamine catabolic process                                            | 1 | 4 | 0.246637 | 1.4398387 |
| GO | androgen binding                                                      | 1 | 4 | 0.246637 | 1.4398387 |
| GO | bone remodeling                                                       | 1 | 4 | 0.246637 | 1.4398387 |
| GO | JUN kinase kinase kinase activity                                     | 1 | 4 | 0.246637 | 1.4398387 |
| GO | cell-cell junction maintenance                                        | 1 | 4 | 0.246637 | 1.4398387 |
| GO | negative regulation of lipid storage                                  | 1 | 4 | 0.246637 | 1.4398387 |
| GO | toll-like receptor 4 signaling pathway                                | 1 | 4 | 0.246637 | 1.4398387 |
| GO | CCAAT-binding factor complex                                          | 1 | 4 | 0.246637 | 1.4398387 |
| GO | arginine binding                                                      | 1 | 4 | 0.246637 | 1.4398387 |
| GO | compartment pattern formation                                         | 1 | 4 | 0.246637 | 1.4398387 |
| GO | positive regulation of glial cell differentiation                     | 1 | 4 | 0.246637 | 1.4398387 |
| GO | regulation of neurogenesis                                            | 1 | 4 | 0.246637 | 1.4398387 |
| GO | regulation of developmental process                                   | 1 | 4 | 0.246637 | 1.4398387 |
| GO | neurotrophin receptor activity                                        | 1 | 4 | 0.246637 | 1.4398387 |
| GO | regulation of respiratory gaseous exchange                            | 1 | 4 | 0.246637 | 1.4398387 |
| GO | ADP biosynthetic process                                              | 1 | 4 | 0.246637 | 1.4398387 |
| GO | mitochondrial proton-transporting ATP synthase complex, catalytic co  | 1 | 4 | 0.246637 | 1.4398387 |
| GO | nerve growth factor processing                                        | 1 | 4 | 0.246637 | 1.4398387 |
| GO | regulation of BMP signaling pathway                                   | 1 | 4 | 0.246637 | 1.4398387 |
| GO | secretion by cell                                                     | 1 | 4 | 0.246637 | 1.4398387 |
| GO | catecholamine biosynthetic process                                    | 1 | 4 | 0.246637 | 1.4398387 |
| GO | aggresome assembly                                                    | 1 | 4 | 0.246637 | 1.4398387 |
| GO | norepinephrine metabolic process                                      | 1 | 4 | 0.246637 | 1.4398387 |
| GO | positive regulation of lipid biosynthetic process                     | 1 | 4 | 0.246637 | 1.4398387 |
| GO | rRNA (adenine-N6,N6-)-dimethyltransferase activity                    | 1 | 4 | 0.246637 | 1.4398387 |
| GO | cGMP-mediated signaling                                               | 1 | 4 | 0.246637 | 1.4398387 |
| GO | intercalated disc                                                     | 1 | 4 | 0.246637 | 1.4398387 |
| GO | phosphoglucomutase activity                                           | 1 | 4 | 0.246637 | 1.4398387 |
| GO | ErbB-3 class receptor binding                                         | 1 | 4 | 0.246637 | 1.4398387 |
| GO | auditory receptor cell stereocilium organization                      | 1 | 4 | 0.246637 | 1.4398387 |
| GO | positive regulation of histone deacetylation                          | 1 | 4 | 0.246637 | 1.4398387 |
| GO | tube morphogenesis                                                    | 1 | 4 | 0.246637 | 1.4398387 |
| GO | regulation of fatty acid metabolic process                            | 1 | 4 | 0.246637 | 1.4398387 |
| GO | platelet activating factor biosynthetic process                       | 1 | 4 | 0.246637 | 1.4398387 |
| GO | pi-body                                                               | 1 | 4 | 0.246637 | 1.4398387 |
| GO | phosphorylase kinase regulator activity                               | 1 | 4 | 0.246637 | 1.4398387 |
| GO | transmembrane receptor protein tyrosine kinase signaling protein acti | 1 | 4 | 0.246637 | 1.4398387 |
| GO | tight junction assembly                                               | 1 | 4 | 0.246637 | 1.4398387 |
| GO | calcium- and calmodulin-dependent protein kinase complex              | 1 | 4 | 0.246637 | 1.4398387 |
| GO | activation of store-operated calcium channel activity                 | 1 | 4 | 0.246637 | 1.4398387 |
| GO | embryonic organ morphogenesis                                         | 1 | 4 | 0.246637 | 1.4398387 |
| GO | negative regulation of cardiac muscle cell proliferation              | 1 | 4 | 0.246637 | 1.4398387 |
| GO | vagina development                                                    | 1 | 4 | 0.246637 | 1.4398387 |

|                                                                         |   |   |          |           |
|-------------------------------------------------------------------------|---|---|----------|-----------|
| GO melatonin receptor activity                                          | 1 | 4 | 0.246637 | 1.4398387 |
| GO retinoic acid receptor activity                                      | 1 | 4 | 0.246637 | 1.4398387 |
| GO mechanoreceptor differentiation                                      | 1 | 4 | 0.246637 | 1.4398387 |
| GO regulation of metabolic process                                      | 1 | 4 | 0.246637 | 1.4398387 |
| GO positive regulation of TOR signaling pathway                         | 1 | 4 | 0.246637 | 1.4398387 |
| GO positive regulation of humoral immune response mediated by circulat  | 1 | 4 | 0.246637 | 1.4398387 |
| GO negative regulation of TOR signaling pathway                         | 1 | 4 | 0.246637 | 1.4398387 |
| GO alpha-N-acetylneuraminate alpha-2,8-sialyltransferase activity       | 1 | 4 | 0.246637 | 1.4398387 |
| GO L-glutamate import                                                   | 1 | 4 | 0.246637 | 1.4398387 |
| GO lens induction in camera-type eye                                    | 1 | 4 | 0.246637 | 1.4398387 |
| GO negative regulation of mitosis                                       | 1 | 4 | 0.246637 | 1.4398387 |
| GO positive regulation of cell death                                    | 1 | 4 | 0.246637 | 1.4398387 |
| GO chloride transmembrane transporter activity                          | 1 | 4 | 0.246637 | 1.4398387 |
| GO urea transport                                                       | 1 | 4 | 0.246637 | 1.4398387 |
| GO arachidonic acid binding                                             | 1 | 4 | 0.246637 | 1.4398387 |
| GO platelet aggregation                                                 | 1 | 4 | 0.246637 | 1.4398387 |
| GO synaptic vesicle maturation                                          | 1 | 4 | 0.246637 | 1.4398387 |
| GO positive regulation of gamma-delta T cell differentiation            | 1 | 4 | 0.246637 | 1.4398387 |
| GO chromaffin granule membrane                                          | 1 | 4 | 0.246637 | 1.4398387 |
| GO progesterone receptor signaling pathway                              | 1 | 4 | 0.246637 | 1.4398387 |
| GO positive regulation of interferon-alpha biosynthetic process         | 1 | 4 | 0.246637 | 1.4398387 |
| GO positive regulation of platelet activation                           | 1 | 4 | 0.246637 | 1.4398387 |
| GO muscle thin filament tropomyosin                                     | 1 | 4 | 0.246637 | 1.4398387 |
| GO luteinization                                                        | 1 | 4 | 0.246637 | 1.4398387 |
| GO dendritic spine membrane                                             | 1 | 4 | 0.246637 | 1.4398387 |
| GO gene expression                                                      | 1 | 4 | 0.246637 | 1.4398387 |
| GO positive regulation of cellular pH reduction                         | 1 | 4 | 0.246637 | 1.4398387 |
| GO positive regulation of adenylate cyclase activity                    | 1 | 4 | 0.246637 | 1.4398387 |
| GO cellular response to glucose starvation                              | 1 | 4 | 0.246637 | 1.4398387 |
| GO maintenance of organ identity                                        | 1 | 4 | 0.246637 | 1.4398387 |
| GO blood vessel maturation                                              | 1 | 4 | 0.246637 | 1.4398387 |
| GO peripheral to membrane of membrane fraction                          | 1 | 4 | 0.246637 | 1.4398387 |
| GO protein phosphatase type 1 complex                                   | 1 | 4 | 0.246637 | 1.4398387 |
| GO [heparan sulfate]-glucosamine N-sulfotransferase activity            | 1 | 4 | 0.246637 | 1.4398387 |
| GO actin filament severing                                              | 1 | 4 | 0.246637 | 1.4398387 |
| GO cyclic nucleotide metabolic process                                  | 1 | 4 | 0.246637 | 1.4398387 |
| GO negative regulation of plasma membrane long-chain fatty acid transpc | 1 | 4 | 0.246637 | 1.4398387 |
| GO positive regulation of glucose metabolic process                     | 1 | 4 | 0.246637 | 1.4398387 |
| GO release of cytoplasmic sequestered NF-kappaB                         | 1 | 4 | 0.246637 | 1.4398387 |
| GO positive regulation of mitochondrial depolarization                  | 1 | 4 | 0.246637 | 1.4398387 |
| GO cellular response to protein stimulus                                | 1 | 4 | 0.246637 | 1.4398387 |
| GO vacuolar acidification                                               | 1 | 4 | 0.246637 | 1.4398387 |
| GO sequestering of actin monomers                                       | 1 | 4 | 0.246637 | 1.4398387 |
| GO phosphatidylinositol-5-phosphate binding                             | 1 | 4 | 0.246637 | 1.4398387 |
| GO long term synaptic depression                                        | 1 | 4 | 0.246637 | 1.4398387 |
| GO response to hydroperoxide                                            | 1 | 4 | 0.246637 | 1.4398387 |
| GO thrombospondin receptor activity                                     | 1 | 4 | 0.246637 | 1.4398387 |
| GO intracellular cholesterol transport                                  | 1 | 4 | 0.246637 | 1.4398387 |
| GO phospholipid transporter activity                                    | 1 | 4 | 0.246637 | 1.4398387 |

|    |                                                                          |    |     |          |            |
|----|--------------------------------------------------------------------------|----|-----|----------|------------|
| GO | peptidyl-lysine deacetylation                                            | 1  | 4   | 0.246637 | 1.4398387  |
| GO | positive regulation of cell migration involved in sprouting angiogenesis | 1  | 4   | 0.246637 | 1.4398387  |
| GO | clathrin coat                                                            | 1  | 4   | 0.246637 | 1.4398387  |
| GO | regulation of protein transport                                          | 1  | 4   | 0.246637 | 1.4398387  |
| GO | lateral element                                                          | 1  | 4   | 0.246637 | 1.4398387  |
| GO | temperature homeostasis                                                  | 2  | 14  | 0.247634 | 1.10517506 |
| GO | glutamine metabolic process                                              | 2  | 14  | 0.247634 | 1.10517506 |
| GO | endosome to lysosome transport                                           | 2  | 14  | 0.247634 | 1.10517506 |
| GO | behavioral fear response                                                 | 2  | 14  | 0.247634 | 1.10517506 |
| GO | nitric oxide mediated signal transduction                                | 2  | 14  | 0.247634 | 1.10517506 |
| GO | response to testosterone stimulus                                        | 2  | 14  | 0.247634 | 1.10517506 |
| GO | protein-chromophore linkage                                              | 2  | 14  | 0.247634 | 1.10517506 |
| GO | sulfur metabolic process                                                 | 2  | 14  | 0.247634 | 1.10517506 |
| GO | embryonic heart tube development                                         | 2  | 14  | 0.247634 | 1.10517506 |
| GO | calmodulin-dependent protein kinase activity                             | 2  | 14  | 0.247634 | 1.10517506 |
| GO | regulation of action potential in neuron                                 | 2  | 14  | 0.247634 | 1.10517506 |
| GO | positive regulation of protein catabolic process                         | 2  | 14  | 0.247634 | 1.10517506 |
| GO | neuroblast proliferation                                                 | 2  | 14  | 0.247634 | 1.10517506 |
| GO | transmembrane transporter activity                                       | 2  | 14  | 0.247634 | 1.10517506 |
| GO | ATP catabolic process                                                    | 2  | 14  | 0.247634 | 1.10517506 |
| GO | decidualization                                                          | 2  | 14  | 0.247634 | 1.10517506 |
| GO | cell fate specification                                                  | 2  | 14  | 0.247634 | 1.10517506 |
| GO | dystrophin-associated glycoprotein complex                               | 2  | 14  | 0.247634 | 1.10517506 |
| GO | pathway-restricted SMAD protein phosphorylation                          | 2  | 14  | 0.247634 | 1.10517506 |
| GO | single-stranded RNA binding                                              | 2  | 14  | 0.247634 | 1.10517506 |
| GO | transcription factor complex                                             | 12 | 140 | 0.249175 | 0.81728188 |
| GO | fatty acid metabolic process                                             | 7  | 75  | 0.251415 | 0.85915296 |
| GO | promoter binding                                                         | 9  | 101 | 0.252835 | 0.82901024 |
| GO | response to oxidative stress                                             | 9  | 101 | 0.252835 | 0.82901024 |
| GO | chloride transport                                                       | 5  | 50  | 0.254893 | 0.88808529 |
| GO | activation of caspase activity                                           | 5  | 50  | 0.254893 | 0.88808529 |
| GO | Golgi cisterna membrane                                                  | 6  | 63  | 0.25987  | 0.84718805 |
| GO | positive regulation of gene expression                                   | 4  | 38  | 0.260029 | 0.90266757 |
| GO | collagen fibril organization                                             | 3  | 26  | 0.260915 | 0.95107994 |
| GO | GDP binding                                                              | 3  | 26  | 0.260915 | 0.95107994 |
| GO | NAD+ ADP-ribosyltransferase activity                                     | 3  | 26  | 0.260915 | 0.95107994 |
| GO | hemopoiesis                                                              | 5  | 51  | 0.268136 | 0.84138139 |
| GO | copper ion binding                                                       | 5  | 51  | 0.268136 | 0.84138139 |
| GO | forebrain development                                                    | 5  | 51  | 0.268136 | 0.84138139 |
| GO | protein complex binding                                                  | 8  | 90  | 0.27242  | 0.77404613 |
| GO | response to nicotine                                                     | 2  | 15  | 0.273697 | 0.99776846 |
| GO | voltage-gated chloride channel activity                                  | 2  | 15  | 0.273697 | 0.99776846 |
| GO | actin filament bundle assembly                                           | 2  | 15  | 0.273697 | 0.99776846 |
| GO | embryonic forelimb morphogenesis                                         | 2  | 15  | 0.273697 | 0.99776846 |
| GO | phospholipid-translocating ATPase activity                               | 2  | 15  | 0.273697 | 0.99776846 |
| GO | positive regulation of catalytic activity                                | 2  | 15  | 0.273697 | 0.99776846 |
| GO | digestive tract development                                              | 2  | 15  | 0.273697 | 0.99776846 |
| GO | cellular component organization                                          | 2  | 15  | 0.273697 | 0.99776846 |
| GO | cellular response to extracellular stimulus                              | 2  | 15  | 0.273697 | 0.99776846 |

|                                                                            |    |     |          |            |
|----------------------------------------------------------------------------|----|-----|----------|------------|
| GO myeloid cell differentiation                                            | 2  | 15  | 0.273697 | 0.99776846 |
| GO neuromuscular junction development                                      | 2  | 15  | 0.273697 | 0.99776846 |
| GO hair follicle development                                               | 2  | 15  | 0.273697 | 0.99776846 |
| GO chondrocyte differentiation                                             | 2  | 15  | 0.273697 | 0.99776846 |
| GO ATPase binding                                                          | 2  | 15  | 0.273697 | 0.99776846 |
| GO oxidoreductase activity, acting on paired donors, with incorporation of | 2  | 15  | 0.273697 | 0.99776846 |
| GO regulation of protein amino acid phosphorylation                        | 2  | 15  | 0.273697 | 0.99776846 |
| GO regulation of immune response                                           | 2  | 15  | 0.273697 | 0.99776846 |
| GO positive regulation of cytokine secretion                               | 2  | 15  | 0.273697 | 0.99776846 |
| GO epithelial cell differentiation                                         | 4  | 39  | 0.275491 | 0.84762832 |
| GO ER-Golgi intermediate compartment                                       | 4  | 39  | 0.275491 | 0.84762832 |
| GO cytoskeletal protein binding                                            | 4  | 39  | 0.275491 | 0.84762832 |
| GO interspecies interaction between organisms                              | 22 | 280 | 0.278823 | 0.68295535 |
| GO ATP synthesis coupled proton transport                                  | 3  | 27  | 0.2799   | 0.88116403 |
| GO enzyme inhibitor activity                                               | 3  | 27  | 0.2799   | 0.88116403 |
| GO negative regulation of neuron differentiation                           | 3  | 27  | 0.2799   | 0.88116403 |
| GO cell-cell adherens junction                                             | 3  | 27  | 0.2799   | 0.88116403 |
| GO negative regulation of cell growth                                      | 8  | 91  | 0.28242  | 0.74134092 |
| GO ubiquitin-protein ligase activity                                       | 12 | 145 | 0.288106 | 0.69027851 |
| GO dendritic spine                                                         | 4  | 40  | 0.291097 | 0.79411803 |
| GO hormone activity                                                        | 7  | 79  | 0.294592 | 0.71506294 |
| GO response to wounding                                                    | 5  | 53  | 0.295041 | 0.75088555 |
| GO ATP biosynthetic process                                                | 5  | 53  | 0.295041 | 0.75088555 |
| GO negative regulation of myotube differentiation                          | 1  | 5   | 0.298138 | 1.16672207 |
| GO mitogen-activated protein kinase kinase binding                         | 1  | 5   | 0.298138 | 1.16672207 |
| GO mRNA modification                                                       | 1  | 5   | 0.298138 | 1.16672207 |
| GO opioid peptide activity                                                 | 1  | 5   | 0.298138 | 1.16672207 |
| GO positive regulation of protein complex assembly                         | 1  | 5   | 0.298138 | 1.16672207 |
| GO sodium ion binding                                                      | 1  | 5   | 0.298138 | 1.16672207 |
| GO sodium-dependent phosphate transmembrane transporter activity           | 1  | 5   | 0.298138 | 1.16672207 |
| GO transepithelial chloride transport                                      | 1  | 5   | 0.298138 | 1.16672207 |
| GO respiratory electron transport chain                                    | 1  | 5   | 0.298138 | 1.16672207 |
| GO barbed-end actin filament capping                                       | 1  | 5   | 0.298138 | 1.16672207 |
| GO calcium- and calmodulin-responsive adenylate cyclase activity           | 1  | 5   | 0.298138 | 1.16672207 |
| GO interleukin-1-mediated signaling pathway                                | 1  | 5   | 0.298138 | 1.16672207 |
| GO negative regulation of cytokine-mediated signaling pathway              | 1  | 5   | 0.298138 | 1.16672207 |
| GO folic acid transporter activity                                         | 1  | 5   | 0.298138 | 1.16672207 |
| GO toxin binding                                                           | 1  | 5   | 0.298138 | 1.16672207 |
| GO regulation of neuron apoptosis                                          | 1  | 5   | 0.298138 | 1.16672207 |
| GO ethanol oxidation                                                       | 1  | 5   | 0.298138 | 1.16672207 |
| GO sphingosine-1-phosphate phosphatase activity                            | 1  | 5   | 0.298138 | 1.16672207 |
| GO monocyte activation                                                     | 1  | 5   | 0.298138 | 1.16672207 |
| GO positive regulation of macrophage differentiation                       | 1  | 5   | 0.298138 | 1.16672207 |
| GO positive regulation of heart contraction                                | 1  | 5   | 0.298138 | 1.16672207 |
| GO positive regulation of potassium ion transport                          | 1  | 5   | 0.298138 | 1.16672207 |
| GO oxidoreductase activity, acting on paired donors, with incorporation of | 1  | 5   | 0.298138 | 1.16672207 |
| GO embryonic camera-type eye development                                   | 1  | 5   | 0.298138 | 1.16672207 |
| GO activation of phospholipase C activity by dopamine receptor signaling   | 1  | 5   | 0.298138 | 1.16672207 |
| GO circadian regulation of gene expression                                 | 1  | 5   | 0.298138 | 1.16672207 |

|    |                                                                          |   |   |          |            |
|----|--------------------------------------------------------------------------|---|---|----------|------------|
| GO | G-protein signaling, coupled to cGMP nucleotide second messenger         | 1 | 5 | 0.298138 | 1.16672207 |
| GO | type 1 angiotensin receptor binding                                      | 1 | 5 | 0.298138 | 1.16672207 |
| GO | artery smooth muscle contraction                                         | 1 | 5 | 0.298138 | 1.16672207 |
| GO | leukocyte activation                                                     | 1 | 5 | 0.298138 | 1.16672207 |
| GO | regulation of systemic arterial blood pressure by endothelin             | 1 | 5 | 0.298138 | 1.16672207 |
| GO | mammary gland involution                                                 | 1 | 5 | 0.298138 | 1.16672207 |
| GO | transmembrane-ephrin receptor activity                                   | 1 | 5 | 0.298138 | 1.16672207 |
| GO | musculoskeletal movement                                                 | 1 | 5 | 0.298138 | 1.16672207 |
| GO | fibroblast growth factor receptor activity                               | 1 | 5 | 0.298138 | 1.16672207 |
| GO | axon midline choice point recognition                                    | 1 | 5 | 0.298138 | 1.16672207 |
| GO | cell morphogenesis involved in neuron differentiation                    | 1 | 5 | 0.298138 | 1.16672207 |
| GO | glycosaminoglycan metabolic process                                      | 1 | 5 | 0.298138 | 1.16672207 |
| GO | mesenchymal cell differentiation                                         | 1 | 5 | 0.298138 | 1.16672207 |
| GO | lymphangiogenesis                                                        | 1 | 5 | 0.298138 | 1.16672207 |
| GO | activation of JNKK activity                                              | 1 | 5 | 0.298138 | 1.16672207 |
| GO | anterograde axon cargo transport                                         | 1 | 5 | 0.298138 | 1.16672207 |
| GO | response to gravity                                                      | 1 | 5 | 0.298138 | 1.16672207 |
| GO | lysosomal transport                                                      | 1 | 5 | 0.298138 | 1.16672207 |
| GO | regulation of receptor activity                                          | 1 | 5 | 0.298138 | 1.16672207 |
| GO | positive regulation of transferase activity                              | 1 | 5 | 0.298138 | 1.16672207 |
| GO | ER to Golgi transport vesicle membrane                                   | 1 | 5 | 0.298138 | 1.16672207 |
| GO | AP-1 adaptor complex                                                     | 1 | 5 | 0.298138 | 1.16672207 |
| GO | SCF-dependent proteasomal ubiquitin-dependent protein catabolic pr       | 1 | 5 | 0.298138 | 1.16672207 |
| GO | vitamin D binding                                                        | 1 | 5 | 0.298138 | 1.16672207 |
| GO | purine base metabolic process                                            | 1 | 5 | 0.298138 | 1.16672207 |
| GO | positive regulation of protein import into nucleus                       | 1 | 5 | 0.298138 | 1.16672207 |
| GO | spinal cord dorsal/ventral patterning                                    | 1 | 5 | 0.298138 | 1.16672207 |
| GO | virion binding                                                           | 1 | 5 | 0.298138 | 1.16672207 |
| GO | virus-host interaction                                                   | 1 | 5 | 0.298138 | 1.16672207 |
| GO | peptidyl-citrulline biosynthetic process from peptidyl-arginine          | 1 | 5 | 0.298138 | 1.16672207 |
| GO | protein-arginine deiminase activity                                      | 1 | 5 | 0.298138 | 1.16672207 |
| GO | azurophil granule                                                        | 1 | 5 | 0.298138 | 1.16672207 |
| GO | S100 alpha binding                                                       | 1 | 5 | 0.298138 | 1.16672207 |
| GO | cell killing                                                             | 1 | 5 | 0.298138 | 1.16672207 |
| GO | CRD-mediated mRNA stability complex                                      | 1 | 5 | 0.298138 | 1.16672207 |
| GO | CRD-mediated mRNA stabilization                                          | 1 | 5 | 0.298138 | 1.16672207 |
| GO | negative regulation of astrocyte differentiation                         | 1 | 5 | 0.298138 | 1.16672207 |
| GO | monocyte differentiation                                                 | 1 | 5 | 0.298138 | 1.16672207 |
| GO | motile secondary cilium                                                  | 1 | 5 | 0.298138 | 1.16672207 |
| GO | negative regulation of insulin-like growth factor receptor signaling pat | 1 | 5 | 0.298138 | 1.16672207 |
| GO | chorio-allantoic fusion                                                  | 1 | 5 | 0.298138 | 1.16672207 |
| GO | ciliary neurotrophic factor-mediated signaling pathway                   | 1 | 5 | 0.298138 | 1.16672207 |
| GO | negative regulation of interleukin-8 production                          | 1 | 5 | 0.298138 | 1.16672207 |
| GO | negative regulation of protein amino acid autophosphorylation            | 1 | 5 | 0.298138 | 1.16672207 |
| GO | glycosphingolipid metabolic process                                      | 1 | 5 | 0.298138 | 1.16672207 |
| GO | regulation of developmental pigmentation                                 | 1 | 5 | 0.298138 | 1.16672207 |
| GO | lipoprotein catabolic process                                            | 1 | 5 | 0.298138 | 1.16672207 |
| GO | low-density lipoprotein particle clearance                               | 1 | 5 | 0.298138 | 1.16672207 |
| GO | positive regulation of GTPase activity                                   | 1 | 5 | 0.298138 | 1.16672207 |

|                                                                             |   |   |          |            |
|-----------------------------------------------------------------------------|---|---|----------|------------|
| GO pericardium development                                                  | 1 | 5 | 0.298138 | 1.16672207 |
| GO primary microRNA processing                                              | 1 | 5 | 0.298138 | 1.16672207 |
| GO regulation of binding                                                    | 1 | 5 | 0.298138 | 1.16672207 |
| GO transforming growth factor beta receptor, pathway-specific cytoplasm     | 1 | 5 | 0.298138 | 1.16672207 |
| GO steroid catabolic process                                                | 1 | 5 | 0.298138 | 1.16672207 |
| GO sulfuric ester hydrolase activity                                        | 1 | 5 | 0.298138 | 1.16672207 |
| GO regulation of osteoclast differentiation                                 | 1 | 5 | 0.298138 | 1.16672207 |
| GO E-box binding                                                            | 1 | 5 | 0.298138 | 1.16672207 |
| GO spinal cord association neuron differentiation                           | 1 | 5 | 0.298138 | 1.16672207 |
| GO nerve growth factor receptor signaling pathway                           | 1 | 5 | 0.298138 | 1.16672207 |
| GO germinal center formation                                                | 1 | 5 | 0.298138 | 1.16672207 |
| GO negative regulation of Notch signaling pathway                           | 1 | 5 | 0.298138 | 1.16672207 |
| GO sprouting angiogenesis                                                   | 1 | 5 | 0.298138 | 1.16672207 |
| GO reduction of cytosolic calcium ion concentration                         | 1 | 5 | 0.298138 | 1.16672207 |
| GO negative regulation of cardiac muscle hypertrophy                        | 1 | 5 | 0.298138 | 1.16672207 |
| GO positive regulation of prostaglandin secretion                           | 1 | 5 | 0.298138 | 1.16672207 |
| GO nerve growth factor binding                                              | 1 | 5 | 0.298138 | 1.16672207 |
| GO peptide metabolic process                                                | 1 | 5 | 0.298138 | 1.16672207 |
| GO negative regulation of cell cycle arrest                                 | 1 | 5 | 0.298138 | 1.16672207 |
| GO glycolipid binding                                                       | 1 | 5 | 0.298138 | 1.16672207 |
| GO glycolipid transporter activity                                          | 1 | 5 | 0.298138 | 1.16672207 |
| GO positive regulation of triglyceride biosynthetic process                 | 1 | 5 | 0.298138 | 1.16672207 |
| GO positive regulation of establishment of protein localization in plasma n | 1 | 5 | 0.298138 | 1.16672207 |
| GO regulation of cytokine production                                        | 1 | 5 | 0.298138 | 1.16672207 |
| GO positive regulation of defense response to virus by host                 | 1 | 5 | 0.298138 | 1.16672207 |
| GO microvillus assembly                                                     | 1 | 5 | 0.298138 | 1.16672207 |
| GO positive regulation of smoothed signaling pathway                        | 1 | 5 | 0.298138 | 1.16672207 |
| GO oocyte development                                                       | 1 | 5 | 0.298138 | 1.16672207 |
| GO serine-type carboxypeptidase activity                                    | 1 | 5 | 0.298138 | 1.16672207 |
| GO DNA-directed RNA polymerase II, holoenzyme                               | 1 | 5 | 0.298138 | 1.16672207 |
| GO cellular amino acid and derivative metabolic process                     | 1 | 5 | 0.298138 | 1.16672207 |
| GO regulation of T cell activation                                          | 1 | 5 | 0.298138 | 1.16672207 |
| GO sodium-independent organic anion transmembrane transporter activit       | 1 | 5 | 0.298138 | 1.16672207 |
| GO regulation of bone mineralization                                        | 1 | 5 | 0.298138 | 1.16672207 |
| GO positive regulation of triglyceride catabolic process                    | 1 | 5 | 0.298138 | 1.16672207 |
| GO melanosome localization                                                  | 1 | 5 | 0.298138 | 1.16672207 |
| GO ammonium transmembrane transporter activity                              | 1 | 5 | 0.298138 | 1.16672207 |
| GO negative regulation of Rho protein signal transduction                   | 1 | 5 | 0.298138 | 1.16672207 |
| GO glutamate secretion                                                      | 1 | 5 | 0.298138 | 1.16672207 |
| GO negative regulation of neuroblast proliferation                          | 1 | 5 | 0.298138 | 1.16672207 |
| GO neuron recognition                                                       | 1 | 5 | 0.298138 | 1.16672207 |
| GO detection of chemical stimulus involved in sensory perception of bitter  | 1 | 5 | 0.298138 | 1.16672207 |
| GO thioredoxin-disulfide reductase activity                                 | 1 | 5 | 0.298138 | 1.16672207 |
| GO BMP receptor binding                                                     | 1 | 5 | 0.298138 | 1.16672207 |
| GO mesenchymal to epithelial transition involved in metanephros morphc      | 1 | 5 | 0.298138 | 1.16672207 |
| GO negative regulation of chondrocyte differentiation                       | 1 | 5 | 0.298138 | 1.16672207 |
| GO negative regulation of oligodendrocyte differentiation                   | 1 | 5 | 0.298138 | 1.16672207 |
| GO positive regulation of branching involved in ureteric bud morphogene     | 1 | 5 | 0.298138 | 1.16672207 |
| GO regulation of smooth muscle cell differentiation                         | 1 | 5 | 0.298138 | 1.16672207 |



|                                                                          |   |    |          |            |
|--------------------------------------------------------------------------|---|----|----------|------------|
| GO tongue morphogenesis                                                  | 1 | 5  | 0.298138 | 1.16672207 |
| GO anion exchanger activity                                              | 1 | 5  | 0.298138 | 1.16672207 |
| GO cellular ion homeostasis                                              | 1 | 5  | 0.298138 | 1.16672207 |
| GO oligopeptide transport                                                | 1 | 5  | 0.298138 | 1.16672207 |
| GO drug transport                                                        | 1 | 5  | 0.298138 | 1.16672207 |
| GO long-term synaptic potentiation                                       | 1 | 5  | 0.298138 | 1.16672207 |
| GO positive regulation of receptor recycling                             | 1 | 5  | 0.298138 | 1.16672207 |
| GO regulation of locomotion                                              | 1 | 5  | 0.298138 | 1.16672207 |
| GO regulation of macrophage activation                                   | 1 | 5  | 0.298138 | 1.16672207 |
| GO tau protein binding                                                   | 1 | 5  | 0.298138 | 1.16672207 |
| GO spectrin-associated cytoskeleton                                      | 1 | 5  | 0.298138 | 1.16672207 |
| GO induction of apoptosis by hormones                                    | 1 | 5  | 0.298138 | 1.16672207 |
| GO somatostatin receptor activity                                        | 1 | 5  | 0.298138 | 1.16672207 |
| GO definitive hemopoiesis                                                | 1 | 5  | 0.298138 | 1.16672207 |
| GO negative regulation of cellular component movement                    | 1 | 5  | 0.298138 | 1.16672207 |
| GO response to prostaglandin E stimulus                                  | 1 | 5  | 0.298138 | 1.16672207 |
| GO toll-like receptor signaling pathway                                  | 1 | 5  | 0.298138 | 1.16672207 |
| GO regulation of short-term neuronal synaptic plasticity                 | 1 | 5  | 0.298138 | 1.16672207 |
| GO mammary gland branching involved in thelarche                         | 1 | 5  | 0.298138 | 1.16672207 |
| GO 1-alkyl-2-acetyl-glycerophosphocholine esterase activity              | 1 | 5  | 0.298138 | 1.16672207 |
| GO intramembranous ossification                                          | 1 | 5  | 0.298138 | 1.16672207 |
| GO phosphatidylinositol transporter activity                             | 1 | 5  | 0.298138 | 1.16672207 |
| GO endoderm formation                                                    | 1 | 5  | 0.298138 | 1.16672207 |
| GO muscle organ morphogenesis                                            | 1 | 5  | 0.298138 | 1.16672207 |
| GO negative regulation of kinase activity                                | 1 | 5  | 0.298138 | 1.16672207 |
| GO regulation of calcium ion transport via voltage-gated calcium channel | 1 | 5  | 0.298138 | 1.16672207 |
| GO secondary active monocarboxylate transmembrane transporter activity   | 1 | 5  | 0.298138 | 1.16672207 |
| GO peptidoglycan receptor activity                                       | 1 | 5  | 0.298138 | 1.16672207 |
| GO N-acetylglucosamine 6-O-sulfotransferase activity                     | 1 | 5  | 0.298138 | 1.16672207 |
| GO cellular metal ion homeostasis                                        | 1 | 5  | 0.298138 | 1.16672207 |
| GO nitric-oxide synthase binding                                         | 1 | 5  | 0.298138 | 1.16672207 |
| GO segment specification                                                 | 1 | 5  | 0.298138 | 1.16672207 |
| GO camera-type eye development                                           | 3 | 28 | 0.299003 | 0.81408553 |
| GO single fertilization                                                  | 3 | 28 | 0.299003 | 0.81408553 |
| GO positive regulation of axonogenesis                                   | 2 | 16 | 0.299715 | 0.89837015 |
| GO vitamin D receptor binding                                            | 2 | 16 | 0.299715 | 0.89837015 |
| GO nicotinic acetylcholine-activated cation-selective channel activity   | 2 | 16 | 0.299715 | 0.89837015 |
| GO nicotinic acetylcholine-gated receptor-channel complex                | 2 | 16 | 0.299715 | 0.89837015 |
| GO phosphatidylinositol-3,4,5-trisphosphate binding                      | 2 | 16 | 0.299715 | 0.89837015 |
| GO negative regulation of insulin secretion                              | 2 | 16 | 0.299715 | 0.89837015 |
| GO receptor complex                                                      | 2 | 16 | 0.299715 | 0.89837015 |
| GO gamete generation                                                     | 2 | 16 | 0.299715 | 0.89837015 |
| GO response to morphine                                                  | 2 | 16 | 0.299715 | 0.89837015 |
| GO lateral plasma membrane                                               | 2 | 16 | 0.299715 | 0.89837015 |
| GO smoothed signaling pathway                                            | 2 | 16 | 0.299715 | 0.89837015 |
| GO response to nutrient levels                                           | 2 | 16 | 0.299715 | 0.89837015 |
| GO internal side of plasma membrane                                      | 2 | 16 | 0.299715 | 0.89837015 |
| GO calcium-dependent cysteine-type endopeptidase activity                | 2 | 16 | 0.299715 | 0.89837015 |
| GO response to axon injury                                               | 2 | 16 | 0.299715 | 0.89837015 |

|    |                                                                              |    |     |          |            |
|----|------------------------------------------------------------------------------|----|-----|----------|------------|
| GO | mitochondrial envelope                                                       | 2  | 16  | 0.299715 | 0.89837015 |
| GO | eukaryotic cell surface binding                                              | 2  | 16  | 0.299715 | 0.89837015 |
| GO | stereocilium                                                                 | 2  | 16  | 0.299715 | 0.89837015 |
| GO | mRNA binding                                                                 | 4  | 41  | 0.306817 | 0.74204953 |
| GO | cellular defense response                                                    | 5  | 54  | 0.308661 | 0.70700984 |
| GO | proton transport                                                             | 5  | 54  | 0.308661 | 0.70700984 |
| GO | basolateral plasma membrane                                                  | 9  | 107 | 0.308862 | 0.64801212 |
| GO | actin cytoskeleton                                                           | 11 | 134 | 0.308876 | 0.63258503 |
| GO | cell proliferation                                                           | 22 | 286 | 0.313206 | 0.57903666 |
| GO | histone deacetylase complex                                                  | 3  | 29  | 0.318171 | 0.74961393 |
| GO | protein kinase C binding                                                     | 3  | 29  | 0.318171 | 0.74961393 |
| GO | keratinocyte differentiation                                                 | 3  | 29  | 0.318171 | 0.74961393 |
| GO | transcriptional repressor complex                                            | 3  | 29  | 0.318171 | 0.74961393 |
| GO | behavior                                                                     | 3  | 29  | 0.318171 | 0.74961393 |
| GO | protein homooligomerization                                                  | 6  | 68  | 0.32007  | 0.65103418 |
| GO | post-embryonic development                                                   | 5  | 55  | 0.322367 | 0.66399739 |
| GO | chemokine activity                                                           | 4  | 42  | 0.32262  | 0.69134274 |
| GO | histone deacetylation                                                        | 2  | 17  | 0.325572 | 0.80585039 |
| GO | positive regulation of cell-substrate adhesion                               | 2  | 17  | 0.325572 | 0.80585039 |
| GO | positive regulation of proteasomal ubiquitin-dependent protein catabolism    | 2  | 17  | 0.325572 | 0.80585039 |
| GO | activation of protein kinase A activity                                      | 2  | 17  | 0.325572 | 0.80585039 |
| GO | DNA damage response, signal transduction resulting in induction of apoptosis | 2  | 17  | 0.325572 | 0.80585039 |
| GO | regulation of pH                                                             | 2  | 17  | 0.325572 | 0.80585039 |
| GO | regulation of angiogenesis                                                   | 2  | 17  | 0.325572 | 0.80585039 |
| GO | NF-kappaB binding                                                            | 2  | 17  | 0.325572 | 0.80585039 |
| GO | rough endoplasmic reticulum                                                  | 2  | 17  | 0.325572 | 0.80585039 |
| GO | anchored to plasma membrane                                                  | 2  | 17  | 0.325572 | 0.80585039 |
| GO | nuclear body                                                                 | 2  | 17  | 0.325572 | 0.80585039 |
| GO | caspase activator activity                                                   | 2  | 17  | 0.325572 | 0.80585039 |
| GO | 2 iron, 2 sulfur cluster binding                                             | 2  | 17  | 0.325572 | 0.80585039 |
| GO | fatty acid binding                                                           | 2  | 17  | 0.325572 | 0.80585039 |
| GO | positive regulation of cell differentiation                                  | 2  | 17  | 0.325572 | 0.80585039 |
| GO | embryonic pattern specification                                              | 2  | 17  | 0.325572 | 0.80585039 |
| GO | embryonic hindlimb morphogenesis                                             | 2  | 17  | 0.325572 | 0.80585039 |
| GO | epithelial to mesenchymal transition                                         | 2  | 17  | 0.325572 | 0.80585039 |
| GO | regulation of excitatory postsynaptic membrane potential                     | 2  | 17  | 0.325572 | 0.80585039 |
| GO | glycerol metabolic process                                                   | 2  | 17  | 0.325572 | 0.80585039 |
| GO | negative regulation of insulin receptor signaling pathway                    | 2  | 17  | 0.325572 | 0.80585039 |
| GO | coreceptor activity                                                          | 2  | 17  | 0.325572 | 0.80585039 |
| GO | myofibril                                                                    | 2  | 17  | 0.325572 | 0.80585039 |
| GO | ribonuclease activity                                                        | 2  | 17  | 0.325572 | 0.80585039 |
| GO | cell junction                                                                | 29 | 387 | 0.329917 | 0.51883318 |
| GO | cell death                                                                   | 10 | 123 | 0.331858 | 0.57111086 |
| GO | transcription coactivator activity                                           | 15 | 192 | 0.333655 | 0.53957741 |
| GO | transporter activity                                                         | 22 | 290 | 0.3368   | 0.51098066 |
| GO | protein tyrosine/serine/threonine phosphatase activity                       | 3  | 30  | 0.337352 | 0.68754501 |
| GO | cell morphogenesis                                                           | 3  | 30  | 0.337352 | 0.68754501 |
| GO | gene silencing by RNA                                                        | 3  | 30  | 0.337352 | 0.68754501 |
| GO | BMP signaling pathway                                                        | 4  | 43  | 0.338476 | 0.64192388 |

|                                                                              |    |     |          |            |
|------------------------------------------------------------------------------|----|-----|----------|------------|
| GO cell-cell adhesion                                                        | 6  | 70  | 0.344735 | 0.57683556 |
| GO growth factor activity                                                    | 12 | 152 | 0.345241 | 0.51992217 |
| GO structural constituent of tooth enamel                                    | 1  | 6   | 0.346122 | 0.95450412 |
| GO alcohol dehydrogenase (NAD) activity                                      | 1  | 6   | 0.346122 | 0.95450412 |
| GO protein phosphatase 2B binding                                            | 1  | 6   | 0.346122 | 0.95450412 |
| GO cellular phosphate ion homeostasis                                        | 1  | 6   | 0.346122 | 0.95450412 |
| GO response to fructose stimulus                                             | 1  | 6   | 0.346122 | 0.95450412 |
| GO bicarbonate transport                                                     | 1  | 6   | 0.346122 | 0.95450412 |
| GO fatty acid oxidation                                                      | 1  | 6   | 0.346122 | 0.95450412 |
| GO acylglycerol lipase activity                                              | 1  | 6   | 0.346122 | 0.95450412 |
| GO alcohol metabolic process                                                 | 1  | 6   | 0.346122 | 0.95450412 |
| GO positive regulation of translational initiation                           | 1  | 6   | 0.346122 | 0.95450412 |
| GO response to dietary excess                                                | 1  | 6   | 0.346122 | 0.95450412 |
| GO glycogen catabolic process                                                | 1  | 6   | 0.346122 | 0.95450412 |
| GO response to glucagon stimulus                                             | 1  | 6   | 0.346122 | 0.95450412 |
| GO retinoic acid metabolic process                                           | 1  | 6   | 0.346122 | 0.95450412 |
| GO activation of transmembrane receptor protein tyrosine kinase activity     | 1  | 6   | 0.346122 | 0.95450412 |
| GO synaptic vesicle transport                                                | 1  | 6   | 0.346122 | 0.95450412 |
| GO negative regulation of synaptic transmission, glutamatergic               | 1  | 6   | 0.346122 | 0.95450412 |
| GO positive regulation of growth hormone secretion                           | 1  | 6   | 0.346122 | 0.95450412 |
| GO regulation of inhibitory postsynaptic membrane potential                  | 1  | 6   | 0.346122 | 0.95450412 |
| GO positive regulation of epidermal growth factor receptor signaling path    | 1  | 6   | 0.346122 | 0.95450412 |
| GO vasoconstriction                                                          | 1  | 6   | 0.346122 | 0.95450412 |
| GO glycoprotein biosynthetic process                                         | 1  | 6   | 0.346122 | 0.95450412 |
| GO glucocorticoid receptor binding                                           | 1  | 6   | 0.346122 | 0.95450412 |
| GO neuromuscular process controlling posture                                 | 1  | 6   | 0.346122 | 0.95450412 |
| GO spinal cord motor neuron differentiation                                  | 1  | 6   | 0.346122 | 0.95450412 |
| GO positive regulation of synaptic transmission, GABAergic                   | 1  | 6   | 0.346122 | 0.95450412 |
| GO germ cell migration                                                       | 1  | 6   | 0.346122 | 0.95450412 |
| GO actomyosin structure organization                                         | 1  | 6   | 0.346122 | 0.95450412 |
| GO histone H3-K9 demethylation                                               | 1  | 6   | 0.346122 | 0.95450412 |
| GO histone H4-K5 acetylation                                                 | 1  | 6   | 0.346122 | 0.95450412 |
| GO histone H4-K8 acetylation                                                 | 1  | 6   | 0.346122 | 0.95450412 |
| GO high-density lipoprotein binding                                          | 1  | 6   | 0.346122 | 0.95450412 |
| GO arachidonic acid metabolic process                                        | 1  | 6   | 0.346122 | 0.95450412 |
| GO nuclear envelope lumen                                                    | 1  | 6   | 0.346122 | 0.95450412 |
| GO fucose metabolic process                                                  | 1  | 6   | 0.346122 | 0.95450412 |
| GO extrinsic to external side of plasma membrane                             | 1  | 6   | 0.346122 | 0.95450412 |
| GO AP-2 adaptor complex                                                      | 1  | 6   | 0.346122 | 0.95450412 |
| GO glycoprotein catabolic process                                            | 1  | 6   | 0.346122 | 0.95450412 |
| GO regulation of synaptic transmission, glutamatergic                        | 1  | 6   | 0.346122 | 0.95450412 |
| GO transmembrane receptor protein tyrosine kinase adaptor protein activ      | 1  | 6   | 0.346122 | 0.95450412 |
| GO phagocytic vesicle                                                        | 1  | 6   | 0.346122 | 0.95450412 |
| GO negative regulation of survival gene product expression                   | 1  | 6   | 0.346122 | 0.95450412 |
| GO epithelial cell development                                               | 1  | 6   | 0.346122 | 0.95450412 |
| GO hyaluronoglucosaminidase activity                                         | 1  | 6   | 0.346122 | 0.95450412 |
| GO lung vasculature development                                              | 1  | 6   | 0.346122 | 0.95450412 |
| GO positive regulation of insulin-like growth factor receptor signaling path | 1  | 6   | 0.346122 | 0.95450412 |
| GO ammonia transmembrane transporter activity                                | 1  | 6   | 0.346122 | 0.95450412 |

|                                                                        |   |   |          |            |
|------------------------------------------------------------------------|---|---|----------|------------|
| GO ammonium transport                                                  | 1 | 6 | 0.346122 | 0.95450412 |
| GO cellular response to hypoxia                                        | 1 | 6 | 0.346122 | 0.95450412 |
| GO cellular response to UV                                             | 1 | 6 | 0.346122 | 0.95450412 |
| GO activation of protein kinase B activity                             | 1 | 6 | 0.346122 | 0.95450412 |
| GO lipoic acid binding                                                 | 1 | 6 | 0.346122 | 0.95450412 |
| GO response to manganese ion                                           | 1 | 6 | 0.346122 | 0.95450412 |
| GO plasma membrane enriched fraction                                   | 1 | 6 | 0.346122 | 0.95450412 |
| GO striated muscle cell differentiation                                | 1 | 6 | 0.346122 | 0.95450412 |
| GO endothelial cell differentiation                                    | 1 | 6 | 0.346122 | 0.95450412 |
| GO glutathione binding                                                 | 1 | 6 | 0.346122 | 0.95450412 |
| GO catecholamine metabolic process                                     | 1 | 6 | 0.346122 | 0.95450412 |
| GO enucleate erythrocyte differentiation                               | 1 | 6 | 0.346122 | 0.95450412 |
| GO forebrain neuron differentiation                                    | 1 | 6 | 0.346122 | 0.95450412 |
| GO response to folic acid                                              | 1 | 6 | 0.346122 | 0.95450412 |
| GO cytoplasmic sequestering of NF-kappaB                               | 1 | 6 | 0.346122 | 0.95450412 |
| GO cadmium ion binding                                                 | 1 | 6 | 0.346122 | 0.95450412 |
| GO negative regulation of glutamate secretion                          | 1 | 6 | 0.346122 | 0.95450412 |
| GO response to fluid shear stress                                      | 1 | 6 | 0.346122 | 0.95450412 |
| GO L-phenylalanine catabolic process                                   | 1 | 6 | 0.346122 | 0.95450412 |
| GO startle response                                                    | 1 | 6 | 0.346122 | 0.95450412 |
| GO peptide cross-linking via chondroitin 4-sulfate glycosaminoglycan   | 1 | 6 | 0.346122 | 0.95450412 |
| GO glycolipid transport                                                | 1 | 6 | 0.346122 | 0.95450412 |
| GO rough endoplasmic reticulum membrane                                | 1 | 6 | 0.346122 | 0.95450412 |
| GO antigen processing and presentation of endogenous peptide antigen v | 1 | 6 | 0.346122 | 0.95450412 |
| GO meiotic prophase I                                                  | 1 | 6 | 0.346122 | 0.95450412 |
| GO negative regulation of T cell activation                            | 1 | 6 | 0.346122 | 0.95450412 |
| GO DNA packaging                                                       | 1 | 6 | 0.346122 | 0.95450412 |
| GO complement activation, lectin pathway                               | 1 | 6 | 0.346122 | 0.95450412 |
| GO parturition                                                         | 1 | 6 | 0.346122 | 0.95450412 |
| GO cytidine deaminase activity                                         | 1 | 6 | 0.346122 | 0.95450412 |
| GO apical junction complex                                             | 1 | 6 | 0.346122 | 0.95450412 |
| GO exocytic vesicle                                                    | 1 | 6 | 0.346122 | 0.95450412 |
| GO erythrocyte development                                             | 1 | 6 | 0.346122 | 0.95450412 |
| GO glycosphingolipid binding                                           | 1 | 6 | 0.346122 | 0.95450412 |
| GO negative regulation of interleukin-2 production                     | 1 | 6 | 0.346122 | 0.95450412 |
| GO sodium channel regulator activity                                   | 1 | 6 | 0.346122 | 0.95450412 |
| GO negative regulation of striated muscle tissue development           | 1 | 6 | 0.346122 | 0.95450412 |
| GO ubiquitin-ubiquitin ligase activity                                 | 1 | 6 | 0.346122 | 0.95450412 |
| GO Hsp70 protein binding                                               | 1 | 6 | 0.346122 | 0.95450412 |
| GO amine metabolic process                                             | 1 | 6 | 0.346122 | 0.95450412 |
| GO enzyme linked receptor protein signaling pathway                    | 1 | 6 | 0.346122 | 0.95450412 |
| GO positive regulation of alpha-beta T cell differentiation            | 1 | 6 | 0.346122 | 0.95450412 |
| GO positive regulation of B cell differentiation                       | 1 | 6 | 0.346122 | 0.95450412 |
| GO macrophage activation                                               | 1 | 6 | 0.346122 | 0.95450412 |
| GO positive regulation of tumor necrosis factor biosynthetic process   | 1 | 6 | 0.346122 | 0.95450412 |
| GO podosome                                                            | 1 | 6 | 0.346122 | 0.95450412 |
| GO store-operated calcium channel activity                             | 1 | 6 | 0.346122 | 0.95450412 |
| GO C-X-C chemokine receptor activity                                   | 1 | 6 | 0.346122 | 0.95450412 |
| GO DNA N-glycosylase activity                                          | 1 | 6 | 0.346122 | 0.95450412 |

|                                                                       |    |     |          |            |
|-----------------------------------------------------------------------|----|-----|----------|------------|
| GO thyroid hormone receptor activity                                  | 1  | 6   | 0.346122 | 0.95450412 |
| GO hyaluronan metabolic process                                       | 1  | 6   | 0.346122 | 0.95450412 |
| GO juxtapanode region of axon                                         | 1  | 6   | 0.346122 | 0.95450412 |
| GO mammary gland epithelial cell proliferation                        | 1  | 6   | 0.346122 | 0.95450412 |
| GO proton-transporting V-type ATPase, V0 domain                       | 1  | 6   | 0.346122 | 0.95450412 |
| GO trophoblast giant cell differentiation                             | 1  | 6   | 0.346122 | 0.95450412 |
| GO phosphatidylinositol-3,5-bisphosphate binding                      | 1  | 6   | 0.346122 | 0.95450412 |
| GO positive regulation of BMP signaling pathway                       | 1  | 6   | 0.346122 | 0.95450412 |
| GO phospholipid homeostasis                                           | 1  | 6   | 0.346122 | 0.95450412 |
| GO bile acid binding                                                  | 1  | 6   | 0.346122 | 0.95450412 |
| GO locomotory behavior                                                | 5  | 57  | 0.349956 | 0.58042152 |
| GO neuron migration                                                   | 5  | 57  | 0.349956 | 0.58042152 |
| GO DNA damage checkpoint                                              | 2  | 18  | 0.351168 | 0.71929675 |
| GO regulation of insulin secretion                                    | 2  | 18  | 0.351168 | 0.71929675 |
| GO embryonic placenta development                                     | 2  | 18  | 0.351168 | 0.71929675 |
| GO response to inorganic substance                                    | 2  | 18  | 0.351168 | 0.71929675 |
| GO pancreas development                                               | 2  | 18  | 0.351168 | 0.71929675 |
| GO WW domain binding                                                  | 2  | 18  | 0.351168 | 0.71929675 |
| GO protein import into nucleus, translocation                         | 2  | 18  | 0.351168 | 0.71929675 |
| GO ADP binding                                                        | 2  | 18  | 0.351168 | 0.71929675 |
| GO proton-transporting ATPase activity, rotational mechanism          | 2  | 18  | 0.351168 | 0.71929675 |
| GO SNARE complex                                                      | 2  | 18  | 0.351168 | 0.71929675 |
| GO anion transport                                                    | 2  | 18  | 0.351168 | 0.71929675 |
| GO cytolysis                                                          | 2  | 18  | 0.351168 | 0.71929675 |
| GO recycling endosome                                                 | 2  | 18  | 0.351168 | 0.71929675 |
| GO pattern specification process                                      | 4  | 44  | 0.354357 | 0.5937249  |
| GO protein stabilization                                              | 3  | 31  | 0.3565   | 0.62769707 |
| GO cation binding                                                     | 3  | 31  | 0.3565   | 0.62769707 |
| GO phospholipid metabolic process                                     | 3  | 31  | 0.3565   | 0.62769707 |
| GO NADP or NADPH binding                                              | 3  | 31  | 0.3565   | 0.62769707 |
| GO embryonic digit morphogenesis                                      | 3  | 31  | 0.3565   | 0.62769707 |
| GO ATPase activity, coupled to transmembrane movement of substances   | 3  | 31  | 0.3565   | 0.62769707 |
| GO early endosome                                                     | 7  | 85  | 0.361881 | 0.51281184 |
| GO intracellular signaling pathway                                    | 14 | 182 | 0.362991 | 0.46063268 |
| GO regulation of cell shape                                           | 5  | 58  | 0.363801 | 0.53979284 |
| GO blood circulation                                                  | 4  | 45  | 0.370236 | 0.54668287 |
| GO regulation of G-protein coupled receptor protein signaling pathway | 3  | 32  | 0.375571 | 0.5699078  |
| GO peptide binding                                                    | 3  | 32  | 0.375571 | 0.5699078  |
| GO peptidyl-tyrosine phosphorylation                                  | 3  | 32  | 0.375571 | 0.5699078  |
| GO G2/M transition of mitotic cell cycle                              | 2  | 19  | 0.376419 | 0.63796267 |
| GO negative regulation of adenylate cyclase activity                  | 2  | 19  | 0.376419 | 0.63796267 |
| GO patterning of blood vessels                                        | 2  | 19  | 0.376419 | 0.63796267 |
| GO protein processing                                                 | 2  | 19  | 0.376419 | 0.63796267 |
| GO heterophilic cell-cell adhesion                                    | 2  | 19  | 0.376419 | 0.63796267 |
| GO collagen catabolic process                                         | 2  | 19  | 0.376419 | 0.63796267 |
| GO cadherin binding                                                   | 2  | 19  | 0.376419 | 0.63796267 |
| GO photoreceptor outer segment                                        | 2  | 19  | 0.376419 | 0.63796267 |
| GO regulation of synaptic plasticity                                  | 2  | 19  | 0.376419 | 0.63796267 |
| GO response to amino acid stimulus                                    | 2  | 19  | 0.376419 | 0.63796267 |

|                                                                        |   |     |          |            |
|------------------------------------------------------------------------|---|-----|----------|------------|
| GO lipid transporter activity                                          | 2 | 19  | 0.376419 | 0.63796267 |
| GO cell migration                                                      | 5 | 59  | 0.377657 | 0.49989664 |
| GO synaptic vesicle                                                    | 4 | 46  | 0.386088 | 0.50073952 |
| GO protein complex assembly                                            | 8 | 101 | 0.38621  | 0.43364765 |
| GO protein trimerization                                               | 1 | 7   | 0.390828 | 0.78133269 |
| GO adenosine deaminase activity                                        | 1 | 7   | 0.390828 | 0.78133269 |
| GO sodium:phosphate symporter activity                                 | 1 | 7   | 0.390828 | 0.78133269 |
| GO folic acid transport                                                | 1 | 7   | 0.390828 | 0.78133269 |
| GO long-chain fatty acid transport                                     | 1 | 7   | 0.390828 | 0.78133269 |
| GO regulation of Cdc42 GTPase activity                                 | 1 | 7   | 0.390828 | 0.78133269 |
| GO adrenoceptor activity                                               | 1 | 7   | 0.390828 | 0.78133269 |
| GO negative regulation of multicellular organism growth                | 1 | 7   | 0.390828 | 0.78133269 |
| GO steroid hydroxylase activity                                        | 1 | 7   | 0.390828 | 0.78133269 |
| GO ear development                                                     | 1 | 7   | 0.390828 | 0.78133269 |
| GO adenohypophysis development                                         | 1 | 7   | 0.390828 | 0.78133269 |
| GO positive regulation of cholesterol esterification                   | 1 | 7   | 0.390828 | 0.78133269 |
| GO positive regulation of heart rate                                   | 1 | 7   | 0.390828 | 0.78133269 |
| GO ephrin receptor signaling pathway                                   | 1 | 7   | 0.390828 | 0.78133269 |
| GO positive regulation of proteolysis                                  | 1 | 7   | 0.390828 | 0.78133269 |
| GO neurofilament cytoskeleton organization                             | 1 | 7   | 0.390828 | 0.78133269 |
| GO regulation of cell size                                             | 1 | 7   | 0.390828 | 0.78133269 |
| GO surfactant homeostasis                                              | 1 | 7   | 0.390828 | 0.78133269 |
| GO histone H4-K12 acetylation                                          | 1 | 7   | 0.390828 | 0.78133269 |
| GO MOZ/MORF histone acetyltransferase complex                          | 1 | 7   | 0.390828 | 0.78133269 |
| GO alpha(1,3)-fucosyltransferase activity                              | 1 | 7   | 0.390828 | 0.78133269 |
| GO negative regulation of catalytic activity                           | 1 | 7   | 0.390828 | 0.78133269 |
| GO superoxide-generating NADPH oxidase activity                        | 1 | 7   | 0.390828 | 0.78133269 |
| GO enteric nervous system development                                  | 1 | 7   | 0.390828 | 0.78133269 |
| GO regulation of cell-matrix adhesion                                  | 1 | 7   | 0.390828 | 0.78133269 |
| GO prostate gland growth                                               | 1 | 7   | 0.390828 | 0.78133269 |
| GO protein heterotetramerization                                       | 1 | 7   | 0.390828 | 0.78133269 |
| GO receptor clustering                                                 | 1 | 7   | 0.390828 | 0.78133269 |
| GO LRR domain binding                                                  | 1 | 7   | 0.390828 | 0.78133269 |
| GO laminin-1 complex                                                   | 1 | 7   | 0.390828 | 0.78133269 |
| GO type I transforming growth factor beta receptor binding             | 1 | 7   | 0.390828 | 0.78133269 |
| GO sympathetic nervous system development                              | 1 | 7   | 0.390828 | 0.78133269 |
| GO nucleosome disassembly                                              | 1 | 7   | 0.390828 | 0.78133269 |
| GO citrate metabolic process                                           | 1 | 7   | 0.390828 | 0.78133269 |
| GO anagen                                                              | 1 | 7   | 0.390828 | 0.78133269 |
| GO morphogenesis of an epithelial sheet                                | 1 | 7   | 0.390828 | 0.78133269 |
| GO death                                                               | 1 | 7   | 0.390828 | 0.78133269 |
| GO neuron maturation                                                   | 1 | 7   | 0.390828 | 0.78133269 |
| GO extracellular ATP-gated cation channel activity                     | 1 | 7   | 0.390828 | 0.78133269 |
| GO purinergic nucleotide receptor activity                             | 1 | 7   | 0.390828 | 0.78133269 |
| GO glycoprotein metabolic process                                      | 1 | 7   | 0.390828 | 0.78133269 |
| GO protein metabolic process                                           | 1 | 7   | 0.390828 | 0.78133269 |
| GO peptide biosynthetic process                                        | 1 | 7   | 0.390828 | 0.78133269 |
| GO semaphorin receptor activity                                        | 1 | 7   | 0.390828 | 0.78133269 |
| GO DNA damage response, signal transduction by p53 class mediator resu | 1 | 7   | 0.390828 | 0.78133269 |

|    |                                                                       |    |     |          |            |
|----|-----------------------------------------------------------------------|----|-----|----------|------------|
| GO | protein K48-linked deubiquitination                                   | 1  | 7   | 0.390828 | 0.78133269 |
| GO | negative regulation of cell-matrix adhesion                           | 1  | 7   | 0.390828 | 0.78133269 |
| GO | nerve development                                                     | 1  | 7   | 0.390828 | 0.78133269 |
| GO | negative regulation of cell size                                      | 1  | 7   | 0.390828 | 0.78133269 |
| GO | glutamate binding                                                     | 1  | 7   | 0.390828 | 0.78133269 |
| GO | ankyrin binding                                                       | 1  | 7   | 0.390828 | 0.78133269 |
| GO | nuclear hormone receptor binding                                      | 1  | 7   | 0.390828 | 0.78133269 |
| GO | dynein binding                                                        | 1  | 7   | 0.390828 | 0.78133269 |
| GO | synaptic transmission, dopaminergic                                   | 1  | 7   | 0.390828 | 0.78133269 |
| GO | synaptic vesicle endocytosis                                          | 1  | 7   | 0.390828 | 0.78133269 |
| GO | response to mercury ion                                               | 1  | 7   | 0.390828 | 0.78133269 |
| GO | positive regulation of alpha-beta T cell proliferation                | 1  | 7   | 0.390828 | 0.78133269 |
| GO | type II transforming growth factor beta receptor binding              | 1  | 7   | 0.390828 | 0.78133269 |
| GO | erythrocyte maturation                                                | 1  | 7   | 0.390828 | 0.78133269 |
| GO | positive regulation of interleukin-10 production                      | 1  | 7   | 0.390828 | 0.78133269 |
| GO | positive regulation of interleukin-8 biosynthetic process             | 1  | 7   | 0.390828 | 0.78133269 |
| GO | positive regulation of MHC class II biosynthetic process              | 1  | 7   | 0.390828 | 0.78133269 |
| GO | response to molecule of bacterial origin                              | 1  | 7   | 0.390828 | 0.78133269 |
| GO | membrane attack complex                                               | 1  | 7   | 0.390828 | 0.78133269 |
| GO | AU-rich element binding                                               | 1  | 7   | 0.390828 | 0.78133269 |
| GO | developmental pigmentation                                            | 1  | 7   | 0.390828 | 0.78133269 |
| GO | secretion                                                             | 1  | 7   | 0.390828 | 0.78133269 |
| GO | adult behavior                                                        | 1  | 7   | 0.390828 | 0.78133269 |
| GO | titin binding                                                         | 1  | 7   | 0.390828 | 0.78133269 |
| GO | detection of mechanical stimulus involved in sensory perception of so | 1  | 7   | 0.390828 | 0.78133269 |
| GO | neurological system process                                           | 1  | 7   | 0.390828 | 0.78133269 |
| GO | pentose-phosphate shunt                                               | 1  | 7   | 0.390828 | 0.78133269 |
| GO | positive regulation of cell-cell adhesion                             | 1  | 7   | 0.390828 | 0.78133269 |
| GO | response to lipid                                                     | 1  | 7   | 0.390828 | 0.78133269 |
| GO | protein deacetylase activity                                          | 1  | 7   | 0.390828 | 0.78133269 |
| GO | mitochondrial outer membrane translocase complex                      | 1  | 7   | 0.390828 | 0.78133269 |
| GO | clathrin coat assembly                                                | 1  | 7   | 0.390828 | 0.78133269 |
| GO | sister chromatid cohesion                                             | 1  | 7   | 0.390828 | 0.78133269 |
| GO | specific RNA polymerase II transcription factor activity              | 3  | 33  | 0.394523 | 0.51403165 |
| GO | endosome                                                              | 16 | 215 | 0.399293 | 0.35473993 |
| GO | desmosome                                                             | 2  | 20  | 0.401252 | 0.56123017 |
| GO | dendrite development                                                  | 2  | 20  | 0.401252 | 0.56123017 |
| GO | connexon complex                                                      | 2  | 20  | 0.401252 | 0.56123017 |
| GO | positive regulation of protein kinase B signaling cascade             | 2  | 20  | 0.401252 | 0.56123017 |
| GO | response to radiation                                                 | 2  | 20  | 0.401252 | 0.56123017 |
| GO | neural crest cell migration                                           | 2  | 20  | 0.401252 | 0.56123017 |
| GO | phosphate metabolic process                                           | 2  | 20  | 0.401252 | 0.56123017 |
| GO | neuron differentiation                                                | 4  | 47  | 0.401887 | 0.45584076 |
| GO | exocytosis                                                            | 4  | 47  | 0.401887 | 0.45584076 |
| GO | response to heat                                                      | 4  | 47  | 0.401887 | 0.45584076 |
| GO | protein domain specific binding                                       | 9  | 117 | 0.40689  | 0.36869127 |
| GO | positive regulation of cell growth                                    | 3  | 34  | 0.41332  | 0.45993767 |
| GO | platelet alpha granule lumen                                          | 3  | 34  | 0.41332  | 0.45993767 |
| GO | receptor signaling protein activity                                   | 3  | 34  | 0.41332  | 0.45993767 |

|                                                                         |    |     |          |            |
|-------------------------------------------------------------------------|----|-----|----------|------------|
| GO presynaptic membrane                                                 | 3  | 34  | 0.41332  | 0.45993767 |
| GO visual perception                                                    | 14 | 189 | 0.417461 | 0.31350579 |
| GO serine-type peptidase activity                                       | 4  | 48  | 0.417611 | 0.41193633 |
| GO integrin binding                                                     | 5  | 62  | 0.419113 | 0.38432911 |
| GO ATPase activity, coupled to transmembrane movement of ions, phospl   | 2  | 21  | 0.425606 | 0.48858248 |
| GO aromatase activity                                                   | 2  | 21  | 0.425606 | 0.48858248 |
| GO negative regulation of caspase activity                              | 2  | 21  | 0.425606 | 0.48858248 |
| GO regulation of multicellular organism growth                          | 2  | 21  | 0.425606 | 0.48858248 |
| GO defense response to virus                                            | 2  | 21  | 0.425606 | 0.48858248 |
| GO release of cytochrome c from mitochondria                            | 2  | 21  | 0.425606 | 0.48858248 |
| GO positive regulation of mesenchymal cell proliferation                | 2  | 21  | 0.425606 | 0.48858248 |
| GO sensory perception of sound                                          | 7  | 91  | 0.430199 | 0.32493141 |
| GO induction of apoptosis by extracellular signals                      | 7  | 91  | 0.430199 | 0.32493141 |
| GO negative regulation of transcription                                 | 11 | 148 | 0.431903 | 0.2892346  |
| GO transmembrane receptor protein tyrosine kinase activity              | 3  | 35  | 0.431928 | 0.40750761 |
| GO acute-phase response                                                 | 3  | 35  | 0.431928 | 0.40750761 |
| GO excretion                                                            | 3  | 35  | 0.431928 | 0.40750761 |
| GO U12-type spliceosomal complex                                        | 1  | 8   | 0.432479 | 0.63510975 |
| GO poly(A) RNA binding                                                  | 1  | 8   | 0.432479 | 0.63510975 |
| GO creatine metabolic process                                           | 1  | 8   | 0.432479 | 0.63510975 |
| GO triglyceride catabolic process                                       | 1  | 8   | 0.432479 | 0.63510975 |
| GO retinoid binding                                                     | 1  | 8   | 0.432479 | 0.63510975 |
| GO positive regulation of cell-matrix adhesion                          | 1  | 8   | 0.432479 | 0.63510975 |
| GO regulation of catalytic activity                                     | 1  | 8   | 0.432479 | 0.63510975 |
| GO small GTPase binding                                                 | 1  | 8   | 0.432479 | 0.63510975 |
| GO sexual reproduction                                                  | 1  | 8   | 0.432479 | 0.63510975 |
| GO negative regulation of protein kinase B signaling cascade            | 1  | 8   | 0.432479 | 0.63510975 |
| GO prepulse inhibition                                                  | 1  | 8   | 0.432479 | 0.63510975 |
| GO dopamine receptor signaling pathway                                  | 1  | 8   | 0.432479 | 0.63510975 |
| GO response to salt stress                                              | 1  | 8   | 0.432479 | 0.63510975 |
| GO non-membrane spanning protein tyrosine phosphatase activity          | 1  | 8   | 0.432479 | 0.63510975 |
| GO ephrin receptor binding                                              | 1  | 8   | 0.432479 | 0.63510975 |
| GO tail morphogenesis                                                   | 1  | 8   | 0.432479 | 0.63510975 |
| GO protein-DNA complex                                                  | 1  | 8   | 0.432479 | 0.63510975 |
| GO adenylate kinase activity                                            | 1  | 8   | 0.432479 | 0.63510975 |
| GO GABA receptor binding                                                | 1  | 8   | 0.432479 | 0.63510975 |
| GO histone H4-K16 acetylation                                           | 1  | 8   | 0.432479 | 0.63510975 |
| GO clathrin binding                                                     | 1  | 8   | 0.432479 | 0.63510975 |
| GO protein homotrimerization                                            | 1  | 8   | 0.432479 | 0.63510975 |
| GO tumor necrosis factor-mediated signaling pathway                     | 1  | 8   | 0.432479 | 0.63510975 |
| GO protein destabilization                                              | 1  | 8   | 0.432479 | 0.63510975 |
| GO histidine catabolic process                                          | 1  | 8   | 0.432479 | 0.63510975 |
| GO antigen processing and presentation of peptide antigen via MHC class | 1  | 8   | 0.432479 | 0.63510975 |
| GO positive regulation of JAK-STAT cascade                              | 1  | 8   | 0.432479 | 0.63510975 |
| GO male sex determination                                               | 1  | 8   | 0.432479 | 0.63510975 |
| GO synapse organization                                                 | 1  | 8   | 0.432479 | 0.63510975 |
| GO epithelial cell proliferation                                        | 1  | 8   | 0.432479 | 0.63510975 |
| GO intestinal cholesterol absorption                                    | 1  | 8   | 0.432479 | 0.63510975 |
| GO embryonic hemopoiesis                                                | 1  | 8   | 0.432479 | 0.63510975 |



|                                                                        |    |     |          |            |
|------------------------------------------------------------------------|----|-----|----------|------------|
| GO co-SMAD binding                                                     | 1  | 8   | 0.432479 | 0.63510975 |
| GO SMAD protein complex assembly                                       | 1  | 8   | 0.432479 | 0.63510975 |
| GO neurotransmitter catabolic process                                  | 1  | 8   | 0.432479 | 0.63510975 |
| GO heterochromatin                                                     | 1  | 8   | 0.432479 | 0.63510975 |
| GO response to lithium ion                                             | 1  | 8   | 0.432479 | 0.63510975 |
| GO hemostasis                                                          | 1  | 8   | 0.432479 | 0.63510975 |
| GO nuclear localization sequence binding                               | 1  | 8   | 0.432479 | 0.63510975 |
| GO positive regulation of cholesterol efflux                           | 1  | 8   | 0.432479 | 0.63510975 |
| GO arginine catabolic process                                          | 1  | 8   | 0.432479 | 0.63510975 |
| GO central nervous system projection neuron axonogenesis               | 1  | 8   | 0.432479 | 0.63510975 |
| GO hydrogen-exporting ATPase activity, phosphorylative mechanism       | 1  | 8   | 0.432479 | 0.63510975 |
| GO phospholipase inhibitor activity                                    | 1  | 8   | 0.432479 | 0.63510975 |
| GO response to sucrose stimulus                                        | 1  | 8   | 0.432479 | 0.63510975 |
| GO cyclin binding                                                      | 1  | 8   | 0.432479 | 0.63510975 |
| GO pharyngeal system development                                       | 1  | 8   | 0.432479 | 0.63510975 |
| GO RNA polymerase II transcription elongation factor activity          | 1  | 8   | 0.432479 | 0.63510975 |
| GO transferase activity, transferring nitrogenous groups               | 1  | 8   | 0.432479 | 0.63510975 |
| GO protein K63-linked deubiquitination                                 | 1  | 8   | 0.432479 | 0.63510975 |
| GO sodium:dicarboxylate symporter activity                             | 1  | 8   | 0.432479 | 0.63510975 |
| GO hemopoietic progenitor cell differentiation                         | 1  | 8   | 0.432479 | 0.63510975 |
| GO membrane-bounded vesicle                                            | 1  | 8   | 0.432479 | 0.63510975 |
| GO protein localization in nucleus                                     | 1  | 8   | 0.432479 | 0.63510975 |
| GO SNARE binding                                                       | 1  | 8   | 0.432479 | 0.63510975 |
| GO antioxidant activity                                                | 1  | 8   | 0.432479 | 0.63510975 |
| GO immunoglobulin mediated immune response                             | 1  | 8   | 0.432479 | 0.63510975 |
| GO cellular protein localization                                       | 1  | 8   | 0.432479 | 0.63510975 |
| GO diacylglycerol binding                                              | 1  | 8   | 0.432479 | 0.63510975 |
| GO intrinsic to membrane                                               | 1  | 8   | 0.432479 | 0.63510975 |
| GO transmembrane receptor protein serine/threonine kinase signaling pa | 1  | 8   | 0.432479 | 0.63510975 |
| GO phosphatidylcholine binding                                         | 1  | 8   | 0.432479 | 0.63510975 |
| GO negative regulation of bone resorption                              | 1  | 8   | 0.432479 | 0.63510975 |
| GO amyloid precursor protein catabolic process                         | 1  | 8   | 0.432479 | 0.63510975 |
| GO actin monomer binding                                               | 1  | 8   | 0.432479 | 0.63510975 |
| GO cell redox homeostasis                                              | 5  | 63  | 0.432841 | 0.34709641 |
| GO PDZ domain binding                                                  | 4  | 49  | 0.433237 | 0.36897945 |
| GO caveola                                                             | 4  | 49  | 0.433237 | 0.36897945 |
| GO response to unfolded protein                                        | 4  | 49  | 0.433237 | 0.36897945 |
| GO protein serine/threonine kinase activity                            | 24 | 335 | 0.435806 | 0.24102365 |
| GO nuclear envelope                                                    | 7  | 92  | 0.441537 | 0.29486273 |
| GO protein tyrosine kinase activity                                    | 6  | 78  | 0.444041 | 0.30072463 |
| GO hormone-mediated signaling pathway                                  | 4  | 50  | 0.448745 | 0.32692649 |
| GO small GTPase mediated signal transduction                           | 14 | 193 | 0.448747 | 0.23188953 |
| GO microvillus                                                         | 2  | 22  | 0.449431 | 0.41958338 |
| GO calcium-independent cell-cell adhesion                              | 2  | 22  | 0.449431 | 0.41958338 |
| GO photoreceptor cell maintenance                                      | 2  | 22  | 0.449431 | 0.41958338 |
| GO placenta development                                                | 2  | 22  | 0.449431 | 0.41958338 |
| GO pigmentation                                                        | 2  | 22  | 0.449431 | 0.41958338 |
| GO eating behavior                                                     | 2  | 22  | 0.449431 | 0.41958338 |
| GO histone-lysine N-methyltransferase activity                         | 2  | 22  | 0.449431 | 0.41958338 |

|                                                                        |    |     |          |            |
|------------------------------------------------------------------------|----|-----|----------|------------|
| GO transport                                                           | 36 | 511 | 0.449876 | 0.19087566 |
| GO cellular amino acid metabolic process                               | 3  | 36  | 0.450315 | 0.35663439 |
| GO I-kappaB kinase/NF-kappaB cascade                                   | 3  | 36  | 0.450315 | 0.35663439 |
| GO perinuclear region of cytoplasm                                     | 22 | 309 | 0.453056 | 0.20011044 |
| GO postsynaptic density                                                | 6  | 79  | 0.456325 | 0.26828682 |
| GO nervous system development                                          | 27 | 382 | 0.456901 | 0.18249763 |
| GO muscle organ development                                            | 7  | 94  | 0.464094 | 0.23571406 |
| GO cell projection                                                     | 7  | 94  | 0.464094 | 0.23571406 |
| GO regulation of growth                                                | 4  | 51  | 0.464116 | 0.28573671 |
| GO secretory granule                                                   | 4  | 51  | 0.464116 | 0.28573671 |
| GO cartilage development                                               | 3  | 37  | 0.468453 | 0.30722074 |
| GO protein catabolic process                                           | 3  | 37  | 0.468453 | 0.30722074 |
| GO protein localization at cell surface                                | 1  | 9   | 0.471284 | 0.50849902 |
| GO androgen metabolic process                                          | 1  | 9   | 0.471284 | 0.50849902 |
| GO mitotic cell cycle                                                  | 1  | 9   | 0.471284 | 0.50849902 |
| GO pseudopodium                                                        | 1  | 9   | 0.471284 | 0.50849902 |
| GO adult feeding behavior                                              | 1  | 9   | 0.471284 | 0.50849902 |
| GO dendrite cytoplasm                                                  | 1  | 9   | 0.471284 | 0.50849902 |
| GO macrophage differentiation                                          | 1  | 9   | 0.471284 | 0.50849902 |
| GO histone monoubiquitination                                          | 1  | 9   | 0.471284 | 0.50849902 |
| GO gonad development                                                   | 1  | 9   | 0.471284 | 0.50849902 |
| GO lamellipodium membrane                                              | 1  | 9   | 0.471284 | 0.50849902 |
| GO positive regulation of JUN kinase activity                          | 1  | 9   | 0.471284 | 0.50849902 |
| GO cellular response to reactive oxygen species                        | 1  | 9   | 0.471284 | 0.50849902 |
| GO sleep                                                               | 1  | 9   | 0.471284 | 0.50849902 |
| GO L-fucose catabolic process                                          | 1  | 9   | 0.471284 | 0.50849902 |
| GO positive regulation of receptor-mediated endocytosis                | 1  | 9   | 0.471284 | 0.50849902 |
| GO DNA damage response, signal transduction by p53 class mediator resu | 1  | 9   | 0.471284 | 0.50849902 |
| GO specific granule                                                    | 1  | 9   | 0.471284 | 0.50849902 |
| GO serotonin binding                                                   | 1  | 9   | 0.471284 | 0.50849902 |
| GO positive regulation of tyrosine phosphorylation of Stat5 protein    | 1  | 9   | 0.471284 | 0.50849902 |
| GO proteoglycan biosynthetic process                                   | 1  | 9   | 0.471284 | 0.50849902 |
| GO regulation of peptidyl-tyrosine phosphorylation                     | 1  | 9   | 0.471284 | 0.50849902 |
| GO muscarinic acetylcholine receptor signaling pathway                 | 1  | 9   | 0.471284 | 0.50849902 |
| GO positive regulation of nitric-oxide synthase activity               | 1  | 9   | 0.471284 | 0.50849902 |
| GO branching involved in salivary gland morphogenesis                  | 1  | 9   | 0.471284 | 0.50849902 |
| GO organ growth                                                        | 1  | 9   | 0.471284 | 0.50849902 |
| GO axonal fasciculation                                                | 1  | 9   | 0.471284 | 0.50849902 |
| GO central nervous system neuron differentiation                       | 1  | 9   | 0.471284 | 0.50849902 |
| GO MHC class I protein binding                                         | 1  | 9   | 0.471284 | 0.50849902 |
| GO vacuolar proton-transporting V-type ATPase complex                  | 1  | 9   | 0.471284 | 0.50849902 |
| GO insulin-like growth factor receptor signaling pathway               | 1  | 9   | 0.471284 | 0.50849902 |
| GO maintenance of protein location in nucleus                          | 1  | 9   | 0.471284 | 0.50849902 |
| GO female gonad development                                            | 1  | 9   | 0.471284 | 0.50849902 |
| GO organic anion transmembrane transporter activity                    | 1  | 9   | 0.471284 | 0.50849902 |
| GO grooming behavior                                                   | 1  | 9   | 0.471284 | 0.50849902 |
| GO response to pain                                                    | 1  | 9   | 0.471284 | 0.50849902 |
| GO apical protein localization                                         | 1  | 9   | 0.471284 | 0.50849902 |
| GO melanosome transport                                                | 1  | 9   | 0.471284 | 0.50849902 |

|                                                                           |    |      |          |            |
|---------------------------------------------------------------------------|----|------|----------|------------|
| GO negative regulation of S phase of mitotic cell cycle                   | 1  | 9    | 0.471284 | 0.50849902 |
| GO detection of bacterium                                                 | 1  | 9    | 0.471284 | 0.50849902 |
| GO dicarboxylic acid transport                                            | 1  | 9    | 0.471284 | 0.50849902 |
| GO epithelial tube branching involved in lung morphogenesis               | 1  | 9    | 0.471284 | 0.50849902 |
| GO smooth muscle tissue development                                       | 1  | 9    | 0.471284 | 0.50849902 |
| GO muscle cell differentiation                                            | 1  | 9    | 0.471284 | 0.50849902 |
| GO positive regulation of release of sequestered calcium ion into cytosol | 1  | 9    | 0.471284 | 0.50849902 |
| GO spectrin                                                               | 1  | 9    | 0.471284 | 0.50849902 |
| GO T-helper 1 type immune response                                        | 1  | 9    | 0.471284 | 0.50849902 |
| GO cleavage furrow                                                        | 1  | 9    | 0.471284 | 0.50849902 |
| GO DNA-(apurinic or apyrimidinic site) lyase activity                     | 1  | 9    | 0.471284 | 0.50849902 |
| GO quinone binding                                                        | 1  | 9    | 0.471284 | 0.50849902 |
| GO sensory perception of light stimulus                                   | 1  | 9    | 0.471284 | 0.50849902 |
| GO ER overload response                                                   | 1  | 9    | 0.471284 | 0.50849902 |
| GO hedgehog receptor activity                                             | 1  | 9    | 0.471284 | 0.50849902 |
| GO two-component signal transduction system (phosphorelay)                | 1  | 9    | 0.471284 | 0.50849902 |
| GO oligosaccharide biosynthetic process                                   | 1  | 9    | 0.471284 | 0.50849902 |
| GO response to food                                                       | 1  | 9    | 0.471284 | 0.50849902 |
| GO ovulation from ovarian follicle                                        | 1  | 9    | 0.471284 | 0.50849902 |
| GO phospholipid efflux                                                    | 1  | 9    | 0.471284 | 0.50849902 |
| GO retinoid X receptor binding                                            | 1  | 9    | 0.471284 | 0.50849902 |
| GO condensed nuclear chromosome, centromeric region                       | 1  | 9    | 0.471284 | 0.50849902 |
| GO sarcoplasmic reticulum                                                 | 2  | 23   | 0.472685 | 0.35386157 |
| GO positive regulation of multicellular organism growth                   | 2  | 23   | 0.472685 | 0.35386157 |
| GO protease binding                                                       | 2  | 23   | 0.472685 | 0.35386157 |
| GO ER-associated protein catabolic process                                | 2  | 23   | 0.472685 | 0.35386157 |
| GO erythrocyte differentiation                                            | 2  | 23   | 0.472685 | 0.35386157 |
| GO regulation of cell adhesion                                            | 2  | 23   | 0.472685 | 0.35386157 |
| GO Golgi stack                                                            | 2  | 23   | 0.472685 | 0.35386157 |
| GO nucleobase, nucleoside, nucleotide and nucleic acid metabolic process  | 5  | 66   | 0.473545 | 0.23895159 |
| GO DNA binding                                                            | 96 | 1392 | 0.478792 | 0.09481585 |
| GO signal transducer activity                                             | 20 | 285  | 0.484792 | 0.12317081 |
| GO carbohydrate metabolic process                                         | 14 | 198  | 0.487656 | 0.13222615 |
| GO microtubule cytoskeleton                                               | 4  | 53   | 0.494376 | 0.20579677 |
| GO cellular membrane organization                                         | 4  | 53   | 0.494376 | 0.20579677 |
| GO activation of adenylate cyclase activity                               | 2  | 24   | 0.495335 | 0.29109863 |
| GO oxygen and reactive oxygen species metabolic process                   | 2  | 24   | 0.495335 | 0.29109863 |
| GO peripheral nervous system development                                  | 2  | 24   | 0.495335 | 0.29109863 |
| GO histone H3 acetylation                                                 | 2  | 24   | 0.495335 | 0.29109863 |
| GO cilium assembly                                                        | 2  | 24   | 0.495335 | 0.29109863 |
| GO transmembrane transport                                                | 34 | 492  | 0.499301 | 0.06746496 |
| GO beta-catenin binding                                                   | 3  | 39   | 0.503887 | 0.21242552 |
| GO insoluble fraction                                                     | 3  | 39   | 0.503887 | 0.21242552 |
| GO G-protein signaling, coupled to cyclic nucleotide second messenger     | 3  | 39   | 0.503887 | 0.21242552 |
| GO aging                                                                  | 6  | 83   | 0.504703 | 0.14259162 |
| GO chromatin silencing                                                    | 1  | 10   | 0.507438 | 0.39674511 |
| GO cellular respiration                                                   | 1  | 10   | 0.507438 | 0.39674511 |
| GO acetylcholine binding                                                  | 1  | 10   | 0.507438 | 0.39674511 |
| GO cognition                                                              | 1  | 10   | 0.507438 | 0.39674511 |

|    |                                                      |   |     |          |            |
|----|------------------------------------------------------|---|-----|----------|------------|
| GO | ribonucleoprotein binding                            | 1 | 10  | 0.507438 | 0.39674511 |
| GO | urea cycle                                           | 1 | 10  | 0.507438 | 0.39674511 |
| GO | positive regulation of cytokine production           | 1 | 10  | 0.507438 | 0.39674511 |
| GO | positive regulation of collagen biosynthetic process | 1 | 10  | 0.507438 | 0.39674511 |
| GO | protein kinase B signaling cascade                   | 1 | 10  | 0.507438 | 0.39674511 |
| GO | carboxylic acid metabolic process                    | 1 | 10  | 0.507438 | 0.39674511 |
| GO | histone acetyltransferase binding                    | 1 | 10  | 0.507438 | 0.39674511 |
| GO | IkappaB kinase complex                               | 1 | 10  | 0.507438 | 0.39674511 |
| GO | MHC class I receptor activity                        | 1 | 10  | 0.507438 | 0.39674511 |
| GO | positive regulation of smooth muscle cell migration  | 1 | 10  | 0.507438 | 0.39674511 |
| GO | acyl-CoA dehydrogenase activity                      | 1 | 10  | 0.507438 | 0.39674511 |
| GO | water channel activity                               | 1 | 10  | 0.507438 | 0.39674511 |
| GO | morphogenesis of embryonic epithelium                | 1 | 10  | 0.507438 | 0.39674511 |
| GO | substrate adhesion-dependent cell spreading          | 1 | 10  | 0.507438 | 0.39674511 |
| GO | I-SMAD binding                                       | 1 | 10  | 0.507438 | 0.39674511 |
| GO | oxygen transporter activity                          | 1 | 10  | 0.507438 | 0.39674511 |
| GO | oxygen transport                                     | 1 | 10  | 0.507438 | 0.39674511 |
| GO | lipopolysaccharide-mediated signaling pathway        | 1 | 10  | 0.507438 | 0.39674511 |
| GO | stem cell maintenance                                | 1 | 10  | 0.507438 | 0.39674511 |
| GO | Golgi lumen                                          | 1 | 10  | 0.507438 | 0.39674511 |
| GO | CUL4 RING ubiquitin ligase complex                   | 1 | 10  | 0.507438 | 0.39674511 |
| GO | cAMP-dependent protein kinase complex                | 1 | 10  | 0.507438 | 0.39674511 |
| GO | transmission of nerve impulse                        | 1 | 10  | 0.507438 | 0.39674511 |
| GO | isotype switching                                    | 1 | 10  | 0.507438 | 0.39674511 |
| GO | cardiac muscle tissue development                    | 1 | 10  | 0.507438 | 0.39674511 |
| GO | signalosome                                          | 1 | 10  | 0.507438 | 0.39674511 |
| GO | L-glutamate transmembrane transporter activity       | 1 | 10  | 0.507438 | 0.39674511 |
| GO | calcium ion homeostasis                              | 1 | 10  | 0.507438 | 0.39674511 |
| GO | platelet alpha granule membrane                      | 1 | 10  | 0.507438 | 0.39674511 |
| GO | platelet alpha granule                               | 1 | 10  | 0.507438 | 0.39674511 |
| GO | B cell receptor signaling pathway                    | 1 | 10  | 0.507438 | 0.39674511 |
| GO | interleukin-1 receptor binding                       | 1 | 10  | 0.507438 | 0.39674511 |
| GO | tumor necrosis factor receptor activity              | 1 | 10  | 0.507438 | 0.39674511 |
| GO | complement activation                                | 1 | 10  | 0.507438 | 0.39674511 |
| GO | mRNA catabolic process                               | 1 | 10  | 0.507438 | 0.39674511 |
| GO | XY body                                              | 1 | 10  | 0.507438 | 0.39674511 |
| GO | killing of cells of another organism                 | 1 | 10  | 0.507438 | 0.39674511 |
| GO | calcium ion-dependent exocytosis                     | 1 | 10  | 0.507438 | 0.39674511 |
| GO | cytokine binding                                     | 1 | 10  | 0.507438 | 0.39674511 |
| GO | embryonic digestive tract development                | 1 | 10  | 0.507438 | 0.39674511 |
| GO | mRNA cap binding complex                             | 1 | 10  | 0.507438 | 0.39674511 |
| GO | NAD metabolic process                                | 1 | 10  | 0.507438 | 0.39674511 |
| GO | positive regulation of T cell activation             | 1 | 10  | 0.507438 | 0.39674511 |
| GO | cellular component movement                          | 7 | 98  | 0.508499 | 0.12115542 |
| GO | dendrite                                             | 9 | 128 | 0.514696 | 0.08836645 |
| GO | melanosome                                           | 6 | 84  | 0.516562 | 0.11212658 |
| GO | mitochondrial intermembrane space                    | 2 | 25  | 0.517355 | 0.23101953 |
| GO | lipid biosynthetic process                           | 2 | 25  | 0.517355 | 0.23101953 |
| GO | glycoprotein binding                                 | 2 | 25  | 0.517355 | 0.23101953 |

|                                                                            |    |     |          |            |
|----------------------------------------------------------------------------|----|-----|----------|------------|
| GO heterotrimeric G-protein complex                                        | 2  | 25  | 0.517355 | 0.23101953 |
| GO fat cell differentiation                                                | 2  | 25  | 0.517355 | 0.23101953 |
| GO osteoblast differentiation                                              | 2  | 25  | 0.517355 | 0.23101953 |
| GO stress fiber                                                            | 2  | 25  | 0.517355 | 0.23101953 |
| GO receptor-mediated endocytosis                                           | 3  | 40  | 0.52114  | 0.16688897 |
| GO catalytic activity                                                      | 8  | 114 | 0.521942 | 0.07754642 |
| GO response to toxin                                                       | 4  | 55  | 0.523889 | 0.12888284 |
| GO cytoplasmic membrane-bounded vesicle                                    | 6  | 85  | 0.528309 | 0.08202449 |
| GO voltage-gated potassium channel complex                                 | 6  | 85  | 0.528309 | 0.08202449 |
| GO magnesium ion binding                                                   | 11 | 159 | 0.528326 | 0.04186063 |
| GO negative regulation of cell cycle                                       | 3  | 41  | 0.53806  | 0.12250048 |
| GO protein import into nucleus                                             | 2  | 26  | 0.538725 | 0.17338525 |
| GO triglyceride metabolic process                                          | 2  | 26  | 0.538725 | 0.17338525 |
| GO skin development                                                        | 2  | 26  | 0.538725 | 0.17338525 |
| GO terminal button                                                         | 2  | 26  | 0.538725 | 0.17338525 |
| GO embryo implantation                                                     | 2  | 26  | 0.538725 | 0.17338525 |
| GO lamellipodium                                                           | 5  | 71  | 0.53903  | 0.06939483 |
| GO focal adhesion                                                          | 6  | 86  | 0.539939 | 0.05227575 |
| GO dipeptidyl-peptidase activity                                           | 1  | 11  | 0.541121 | 0.29660426 |
| GO motor axon guidance                                                     | 1  | 11  | 0.541121 | 0.29660426 |
| GO positive regulation of axon extension                                   | 1  | 11  | 0.541121 | 0.29660426 |
| GO negative regulation of JNK cascade                                      | 1  | 11  | 0.541121 | 0.29660426 |
| GO fibroblast growth factor binding                                        | 1  | 11  | 0.541121 | 0.29660426 |
| GO DNA bending activity                                                    | 1  | 11  | 0.541121 | 0.29660426 |
| GO maternal process involved in female pregnancy                           | 1  | 11  | 0.541121 | 0.29660426 |
| GO sodium channel activity                                                 | 1  | 11  | 0.541121 | 0.29660426 |
| GO SCF ubiquitin ligase complex                                            | 1  | 11  | 0.541121 | 0.29660426 |
| GO positive regulation of vascular endothelial growth factor receptor sign | 1  | 11  | 0.541121 | 0.29660426 |
| GO myelin sheath                                                           | 1  | 11  | 0.541121 | 0.29660426 |
| GO trophoctodermal cell differentiation                                    | 1  | 11  | 0.541121 | 0.29660426 |
| GO delayed rectifier potassium channel activity                            | 1  | 11  | 0.541121 | 0.29660426 |
| GO low-density lipoprotein receptor activity                               | 1  | 11  | 0.541121 | 0.29660426 |
| GO actin filament polymerization                                           | 1  | 11  | 0.541121 | 0.29660426 |
| GO positive regulation of epithelial to mesenchymal transition             | 1  | 11  | 0.541121 | 0.29660426 |
| GO positive regulation of neurogenesis                                     | 1  | 11  | 0.541121 | 0.29660426 |
| GO methionine biosynthetic process                                         | 1  | 11  | 0.541121 | 0.29660426 |
| GO gamma-tubulin binding                                                   | 1  | 11  | 0.541121 | 0.29660426 |
| GO FMN binding                                                             | 1  | 11  | 0.541121 | 0.29660426 |
| GO nitric oxide biosynthetic process                                       | 1  | 11  | 0.541121 | 0.29660426 |
| GO oligodendrocyte differentiation                                         | 1  | 11  | 0.541121 | 0.29660426 |
| GO positive regulation of calcium ion transport into cytosol               | 1  | 11  | 0.541121 | 0.29660426 |
| GO Ras GTPase binding                                                      | 1  | 11  | 0.541121 | 0.29660426 |
| GO intermediate filament cytoskeleton                                      | 1  | 11  | 0.541121 | 0.29660426 |
| GO neuropeptide receptor activity                                          | 1  | 11  | 0.541121 | 0.29660426 |
| GO replication fork                                                        | 1  | 11  | 0.541121 | 0.29660426 |
| GO npBAF complex                                                           | 1  | 11  | 0.541121 | 0.29660426 |
| GO cellular response to oxidative stress                                   | 1  | 11  | 0.541121 | 0.29660426 |
| GO response to magnesium ion                                               | 1  | 11  | 0.541121 | 0.29660426 |
| GO positive regulation of interferon-gamma biosynthetic process            | 1  | 11  | 0.541121 | 0.29660426 |

|                                                                          |   |     |          |            |
|--------------------------------------------------------------------------|---|-----|----------|------------|
| GO positive regulation of interferon-gamma production                    | 1 | 11  | 0.541121 | 0.29660426 |
| GO initiation of viral infection                                         | 1 | 11  | 0.541121 | 0.29660426 |
| GO positive regulation of erythrocyte differentiation                    | 1 | 11  | 0.541121 | 0.29660426 |
| GO phosphatidylinositol-3,4-bisphosphate binding                         | 1 | 11  | 0.541121 | 0.29660426 |
| GO pyridine nucleotide biosynthetic process                              | 1 | 11  | 0.541121 | 0.29660426 |
| GO P-P-bond-hydrolysis-driven protein transmembrane transporter activit  | 1 | 11  | 0.541121 | 0.29660426 |
| GO bile acid metabolic process                                           | 1 | 11  | 0.541121 | 0.29660426 |
| GO oocyte maturation                                                     | 1 | 11  | 0.541121 | 0.29660426 |
| GO transcription regulator activity                                      | 7 | 102 | 0.551579 | 0.01120772 |
| GO synaptic vesicle membrane                                             | 3 | 42  | 0.554633 | 0.07919755 |
| GO JAK-STAT cascade                                                      | 2 | 27  | 0.559431 | 0.11798685 |
| GO negative regulation of Wnt receptor signaling pathway                 | 2 | 27  | 0.559431 | 0.11798685 |
| GO phagocytosis                                                          | 2 | 27  | 0.559431 | 0.11798685 |
| GO cell aging                                                            | 2 | 27  | 0.559431 | 0.11798685 |
| GO meiosis                                                               | 4 | 58  | 0.56653  | 0.01865991 |
| GO structural constituent of muscle                                      | 3 | 43  | 0.570845 | 0.03692257 |
| GO ligand-dependent nuclear receptor binding                             | 1 | 12  | 0.572503 | 0.20577273 |
| GO lysophospholipase activity                                            | 1 | 12  | 0.572503 | 0.20577273 |
| GO response to chemical stimulus                                         | 1 | 12  | 0.572503 | 0.20577273 |
| GO endothelial cell migration                                            | 1 | 12  | 0.572503 | 0.20577273 |
| GO release of sequestered calcium ion into cytosol                       | 1 | 12  | 0.572503 | 0.20577273 |
| GO ephrin receptor activity                                              | 1 | 12  | 0.572503 | 0.20577273 |
| GO acetyltransferase activity                                            | 1 | 12  | 0.572503 | 0.20577273 |
| GO arylsulfatase activity                                                | 1 | 12  | 0.572503 | 0.20577273 |
| GO glutamate receptor activity                                           | 1 | 12  | 0.572503 | 0.20577273 |
| GO estradiol 17-beta-dehydrogenase activity                              | 1 | 12  | 0.572503 | 0.20577273 |
| GO male meiosis                                                          | 1 | 12  | 0.572503 | 0.20577273 |
| GO positive regulation of peptidyl-serine phosphorylation                | 1 | 12  | 0.572503 | 0.20577273 |
| GO cGMP biosynthetic process                                             | 1 | 12  | 0.572503 | 0.20577273 |
| GO activation of protein kinase activity                                 | 1 | 12  | 0.572503 | 0.20577273 |
| GO platelet-derived growth factor receptor binding                       | 1 | 12  | 0.572503 | 0.20577273 |
| GO smooth muscle contraction                                             | 1 | 12  | 0.572503 | 0.20577273 |
| GO endochondral ossification                                             | 1 | 12  | 0.572503 | 0.20577273 |
| GO hydrolase activity, acting on carbon-nitrogen (but not peptide) bonds | 1 | 12  | 0.572503 | 0.20577273 |
| GO mitochondrial ATP synthesis coupled proton transport                  | 1 | 12  | 0.572503 | 0.20577273 |
| GO triglyceride homeostasis                                              | 1 | 12  | 0.572503 | 0.20577273 |
| GO axon terminus                                                         | 1 | 12  | 0.572503 | 0.20577273 |
| GO costamere                                                             | 1 | 12  | 0.572503 | 0.20577273 |
| GO histone methylation                                                   | 1 | 12  | 0.572503 | 0.20577273 |
| GO iron-sulfur cluster binding                                           | 1 | 12  | 0.572503 | 0.20577273 |
| GO calcium channel regulator activity                                    | 1 | 12  | 0.572503 | 0.20577273 |
| GO positive regulation of cellular component movement                    | 1 | 12  | 0.572503 | 0.20577273 |
| GO voltage-gated sodium channel complex                                  | 1 | 12  | 0.572503 | 0.20577273 |
| GO positive regulation of innate immune response                         | 1 | 12  | 0.572503 | 0.20577273 |
| GO dorsal/ventral neural tube patterning                                 | 1 | 12  | 0.572503 | 0.20577273 |
| GO nBAF complex                                                          | 1 | 12  | 0.572503 | 0.20577273 |
| GO alpha-tubulin binding                                                 | 1 | 12  | 0.572503 | 0.20577273 |
| GO ferrous iron binding                                                  | 1 | 12  | 0.572503 | 0.20577273 |
| GO glutamate signaling pathway                                           | 1 | 12  | 0.572503 | 0.20577273 |

|                                                                           |   |    |          |            |
|---------------------------------------------------------------------------|---|----|----------|------------|
| GO T cell receptor complex                                                | 1 | 12 | 0.572503 | 0.20577273 |
| GO negative regulation of cyclin-dependent protein kinase activity        | 1 | 12 | 0.572503 | 0.20577273 |
| GO regulation of muscle contraction                                       | 1 | 12 | 0.572503 | 0.20577273 |
| GO NLS-bearing substrate import into nucleus                              | 1 | 12 | 0.572503 | 0.20577273 |
| GO mammary gland alveolus development                                     | 1 | 12 | 0.572503 | 0.20577273 |
| GO regulation of lipid metabolic process                                  | 1 | 12 | 0.572503 | 0.20577273 |
| GO cholesterol transporter activity                                       | 1 | 12 | 0.572503 | 0.20577273 |
| GO protein oligomerization                                                | 2 | 28 | 0.579464 | 0.06464066 |
| GO activation of phospholipase C activity by G-protein coupled receptor p | 2 | 28 | 0.579464 | 0.06464066 |
| GO negative regulation of transforming growth factor beta receptor signal | 2 | 28 | 0.579464 | 0.06464066 |
| GO small GTPase regulator activity                                        | 2 | 28 | 0.579464 | 0.06464066 |
| GO antigen processing and presentation                                    | 2 | 28 | 0.579464 | 0.06464066 |
| GO regulation of cell migration                                           | 2 | 28 | 0.579464 | 0.06464066 |
| GO ruffle membrane                                                        | 2 | 29 | 0.598819 | 0.01318446 |
| GO chaperone binding                                                      | 2 | 29 | 0.598819 | 0.01318446 |
| GO cyclin-dependent protein kinase activity                               | 2 | 29 | 0.598819 | 0.01318446 |
| GO phosphate binding                                                      | 1 | 13 | 0.60174  | 0.12255989 |
| GO cAMP biosynthetic process                                              | 1 | 13 | 0.60174  | 0.12255989 |
| GO folic acid binding                                                     | 1 | 13 | 0.60174  | 0.12255989 |
| GO cell wall macromolecule catabolic process                              | 1 | 13 | 0.60174  | 0.12255989 |
| GO regulation of cell differentiation                                     | 1 | 13 | 0.60174  | 0.12255989 |
| GO bone resorption                                                        | 1 | 13 | 0.60174  | 0.12255989 |
| GO steroid hormone receptor signaling pathway                             | 1 | 13 | 0.60174  | 0.12255989 |
| GO epidermal growth factor receptor binding                               | 1 | 13 | 0.60174  | 0.12255989 |
| GO positive regulation of hormone secretion                               | 1 | 13 | 0.60174  | 0.12255989 |
| GO endosome organization                                                  | 1 | 13 | 0.60174  | 0.12255989 |
| GO receptor signaling complex scaffold activity                           | 1 | 13 | 0.60174  | 0.12255989 |
| GO fibroblast growth factor receptor binding                              | 1 | 13 | 0.60174  | 0.12255989 |
| GO superoxide anion generation                                            | 1 | 13 | 0.60174  | 0.12255989 |
| GO serotonin receptor activity                                            | 1 | 13 | 0.60174  | 0.12255989 |
| GO glial cell differentiation                                             | 1 | 13 | 0.60174  | 0.12255989 |
| GO myoblast differentiation                                               | 1 | 13 | 0.60174  | 0.12255989 |
| GO extracellular matrix binding                                           | 1 | 13 | 0.60174  | 0.12255989 |
| GO oligodendrocyte development                                            | 1 | 13 | 0.60174  | 0.12255989 |
| GO hydrogen ion transporting ATP synthase activity, rotational mechanisn  | 1 | 13 | 0.60174  | 0.12255989 |
| GO protein autoubiquitination                                             | 1 | 13 | 0.60174  | 0.12255989 |
| GO retrograde transport, endosome to Golgi                                | 1 | 13 | 0.60174  | 0.12255989 |
| GO transcription elongation factor complex                                | 1 | 13 | 0.60174  | 0.12255989 |
| GO regulation of protein kinase activity                                  | 1 | 13 | 0.60174  | 0.12255989 |
| GO organic anion transport                                                | 1 | 13 | 0.60174  | 0.12255989 |
| GO regulation of smooth muscle contraction                                | 1 | 13 | 0.60174  | 0.12255989 |
| GO hippo signaling pathway                                                | 1 | 13 | 0.60174  | 0.12255989 |
| GO negative regulation of phosphorylation                                 | 1 | 13 | 0.60174  | 0.12255989 |
| GO low-density lipoprotein binding                                        | 1 | 13 | 0.60174  | 0.12255989 |
| GO myosin binding                                                         | 1 | 13 | 0.60174  | 0.12255989 |
| GO lipid homeostasis                                                      | 1 | 13 | 0.60174  | 0.12255989 |
| GO T cell homeostasis                                                     | 1 | 13 | 0.60174  | 0.12255989 |
| GO response to bacterium                                                  | 1 | 13 | 0.60174  | 0.12255989 |
| GO high-density lipoprotein particle remodeling                           | 1 | 13 | 0.60174  | 0.12255989 |

|    |                                                                           |     |      |          |            |
|----|---------------------------------------------------------------------------|-----|------|----------|------------|
| GO | DNA-directed RNA polymerase II, core complex                              | 1   | 14   | 0.628979 | 0.04569098 |
| GO | senescence                                                                | 1   | 14   | 0.628979 | 0.04569098 |
| GO | dynein complex                                                            | 1   | 14   | 0.628979 | 0.04569098 |
| GO | nuclear heterochromatin                                                   | 1   | 14   | 0.628979 | 0.04569098 |
| GO | DNA methylation                                                           | 1   | 14   | 0.628979 | 0.04569098 |
| GO | cellular response to starvation                                           | 1   | 14   | 0.628979 | 0.04569098 |
| GO | membrane protein ectodomain proteolysis                                   | 1   | 14   | 0.628979 | 0.04569098 |
| GO | regulation of action potential                                            | 1   | 14   | 0.628979 | 0.04569098 |
| GO | anatomical structure formation involved in morphogenesis                  | 1   | 14   | 0.628979 | 0.04569098 |
| GO | positive regulation of transforming growth factor beta receptor signaling | 1   | 14   | 0.628979 | 0.04569098 |
| GO | regulation of transforming growth factor beta receptor signaling pathway  | 1   | 14   | 0.628979 | 0.04569098 |
| GO | phosphoinositide phosphorylation                                          | 1   | 14   | 0.628979 | 0.04569098 |
| GO | 3'-5' exonuclease activity                                                | 1   | 14   | 0.628979 | 0.04569098 |
| GO | cytokine production                                                       | 1   | 14   | 0.628979 | 0.04569098 |
| GO | microtubule-based flagellum                                               | 1   | 14   | 0.628979 | 0.04569098 |
| GO | response to interferon-gamma                                              | 1   | 14   | 0.628979 | 0.04569098 |
| GO | tropomyosin binding                                                       | 1   | 14   | 0.628979 | 0.04569098 |
| GO | filamentous actin                                                         | 1   | 14   | 0.628979 | 0.04569098 |
| GO | voltage-gated potassium channel activity                                  | 3   | 63   | 0.989    | -0.6530869 |
| GO | chromatin modification                                                    | 11  | 204  | 0.989    | -0.8209609 |
| GO | chromatin organization                                                    | 1   | 19   | 0.989    | -0.2716131 |
| GO | chromatin remodeling                                                      | 2   | 46   | 0.989    | -0.6692339 |
| GO | cytoplasm                                                                 | 293 | 4355 | 0.989    | -0.318496  |
| GO | hydrolase activity                                                        | 61  | 917  | 0.989    | -0.2247214 |
| GO | nucleus                                                                   | 305 | 4735 | 0.989    | -1.2382054 |
| GO | regulation of transcription                                               | 64  | 956  | 0.989    | -0.1763453 |
| GO | specific transcriptional repressor activity                               | 2   | 38   | 0.989    | -0.3843114 |
| GO | homophilic cell adhesion                                                  | 8   | 135  | 0.989    | -0.4199774 |
| GO | Wnt receptor signaling pathway through beta-catenin                       | 1   | 23   | 0.989    | -0.4729329 |
| GO | RNA splicing                                                              | 5   | 251  | 0.989    | -3.0606908 |
| GO | carbohydrate biosynthetic process                                         | 1   | 17   | 0.989    | -0.1556918 |
| GO | transferase activity                                                      | 57  | 1127 | 0.989    | -2.4376244 |
| GO | lysosomal membrane                                                        | 2   | 83   | 0.989    | -1.6011028 |
| GO | soluble fraction                                                          | 20  | 315  | 0.989    | -0.3444081 |
| GO | cellular_component                                                        | 34  | 528  | 0.989    | -0.3651737 |
| GO | cytosol                                                                   | 59  | 1230 | 0.989    | -2.9289359 |
| GO | acyltransferase activity                                                  | 5   | 133  | 0.989    | -1.4104393 |
| GO | integral to endoplasmic reticulum membrane                                | 2   | 46   | 0.989    | -0.6692339 |
| GO | cytoskeleton                                                              | 39  | 635  | 0.989    | -0.7039731 |
| GO | ATP binding                                                               | 87  | 1426 | 0.989    | -1.1418424 |
| GO | negative regulation of transcription factor activity                      | 1   | 30   | 0.989    | -0.7605964 |
| GO | protein kinase activity                                                   | 7   | 170  | 0.989    | -1.4102369 |
| GO | microtubule                                                               | 9   | 233  | 0.989    | -1.8089579 |
| GO | intracellular protein transport                                           | 2   | 174  | 0.989    | -2.9856027 |
| GO | protein transporter activity                                              | 2   | 69   | 0.989    | -1.2980687 |
| GO | protein transport                                                         | 25  | 388  | 0.989    | -0.308779  |
| GO | ER to Golgi vesicle-mediated transport                                    | 1   | 41   | 0.989    | -1.1165976 |
| GO | vesicle-mediated transport                                                | 6   | 165  | 0.989    | -1.635216  |
| GO | membrane fraction                                                         | 31  | 472  | 0.989    | -0.2327974 |



|                                                                            |     |      |       |            |
|----------------------------------------------------------------------------|-----|------|-------|------------|
| GO hydrogen ion transmembrane transporter activity                         | 1   | 20   | 0.989 | -0.325338  |
| GO mitochondrion                                                           | 51  | 1193 | 0.989 | -3.6193147 |
| GO Cajal body                                                              | 1   | 38   | 0.989 | -1.0278009 |
| GO ligase activity                                                         | 16  | 303  | 0.989 | -1.0807961 |
| GO nuclear speck                                                           | 4   | 111  | 0.989 | -1.3530016 |
| GO double-stranded RNA binding                                             | 2   | 31   | 0.989 | -0.0846181 |
| GO mRNA processing                                                         | 5   | 231  | 0.989 | -2.83014   |
| GO nucleolus                                                               | 41  | 692  | 0.989 | -0.9663498 |
| GO nucleoplasm                                                             | 12  | 455  | 0.989 | -3.5913344 |
| GO RNA binding                                                             | 17  | 562  | 0.989 | -3.6333204 |
| GO RNA processing                                                          | 3   | 80   | 0.989 | -1.0956941 |
| GO axon guidance                                                           | 4   | 71   | 0.989 | -0.4017804 |
| GO endoplasmic reticulum lumen                                             | 3   | 68   | 0.989 | -0.7932213 |
| GO biological_process                                                      | 36  | 547  | 0.989 | -0.2383713 |
| GO sodium ion transport                                                    | 7   | 129  | 0.989 | -0.6360887 |
| GO cell cycle                                                              | 19  | 458  | 0.989 | -2.3061836 |
| GO female gamete generation                                                | 1   | 15   | 0.989 | -0.0258174 |
| GO regulation of gene expression                                           | 2   | 32   | 0.989 | -0.1312076 |
| GO nucleotide binding                                                      | 110 | 1859 | 0.989 | -1.650776  |
| GO ATPase activity                                                         | 8   | 128  | 0.989 | -0.2630822 |
| GO cholesterol biosynthetic process                                        | 1   | 25   | 0.989 | -0.5620556 |
| GO cytoplasmic vesicle membrane                                            | 4   | 61   | 0.989 | -0.0860063 |
| GO early endosome membrane                                                 | 1   | 37   | 0.989 | -0.9969995 |
| GO enzyme binding                                                          | 7   | 114  | 0.989 | -0.2947195 |
| GO androgen receptor binding                                               | 1   | 29   | 0.989 | -0.723245  |
| GO androgen receptor signaling pathway                                     | 1   | 39   | 0.989 | -1.0579801 |
| GO ligand-dependent nuclear receptor transcription coactivator activity    | 1   | 31   | 0.989 | -0.7969334 |
| GO mitochondrion organization                                              | 1   | 25   | 0.989 | -0.5620556 |
| GO RNA polymerase II transcription mediator activity                       | 1   | 28   | 0.989 | -0.6848042 |
| GO transcription initiation from RNA polymerase II promoter                | 1   | 64   | 0.989 | -1.6742596 |
| GO DNA repair                                                              | 2   | 182  | 0.989 | -3.0812562 |
| GO molecular_function                                                      | 27  | 577  | 0.989 | -2.0836371 |
| GO identical protein binding                                               | 22  | 338  | 0.989 | -0.2396045 |
| GO inhibition of adenylate cyclase activity by G-protein signaling pathway | 2   | 30   | 0.989 | -0.0365257 |
| GO chromosome, telomeric region                                            | 1   | 23   | 0.989 | -0.4729329 |
| GO response to DNA damage stimulus                                         | 3   | 78   | 0.989 | -1.0481326 |
| GO neuron projection morphogenesis                                         | 1   | 17   | 0.989 | -0.1556918 |
| GO cell communication                                                      | 5   | 90   | 0.989 | -0.4820701 |
| GO phosphoinositide binding                                                | 3   | 56   | 0.989 | -0.438846  |
| GO cellular calcium ion homeostasis                                        | 4   | 60   | 0.989 | -0.0516961 |
| GO extracellular ligand-gated ion channel activity                         | 3   | 46   | 0.989 | -0.0842472 |
| GO postsynaptic membrane                                                   | 7   | 149  | 0.989 | -1.0377    |
| GO synapse                                                                 | 16  | 255  | 0.989 | -0.3569683 |
| GO G-protein coupled receptor protein signaling pathway                    | 43  | 725  | 0.989 | -0.9832936 |
| GO electron carrier activity                                               | 10  | 149  | 0.989 | -0.0599297 |
| GO protein disulfide oxidoreductase activity                               | 1   | 15   | 0.989 | -0.0258174 |
| GO olfactory receptor activity                                             | 5   | 290  | 0.989 | -3.4755007 |
| GO response to stimulus                                                    | 17  | 477  | 0.989 | -2.867116  |
| GO sensory perception of smell                                             | 6   | 305  | 0.989 | -3.3960898 |

|    |                                                 |    |     |       |            |
|----|-------------------------------------------------|----|-----|-------|------------|
| GO | mitochondrial inner membrane                    | 10 | 231 | 0.989 | -1.5184843 |
| GO | MLL1 complex                                    | 1  | 26  | 0.989 | -0.6043094 |
| GO | cell cycle arrest                               | 5  | 108 | 0.989 | -0.9107392 |
| GO | neuron projection development                   | 2  | 41  | 0.989 | -0.4970486 |
| GO | peptidyl-serine phosphorylation                 | 1  | 26  | 0.989 | -0.6043094 |
| GO | Rab GTPase activator activity                   | 2  | 44  | 0.989 | -0.6024802 |
| GO | regulation of Rab GTPase activity               | 2  | 44  | 0.989 | -0.6024802 |
| GO | post-translational protein modification         | 1  | 27  | 0.989 | -0.6451903 |
| GO | regulation of protein metabolic process         | 2  | 42  | 0.989 | -0.5329476 |
| GO | heat shock protein binding                      | 4  | 62  | 0.989 | -0.1197661 |
| GO | nucleic acid binding                            | 9  | 254 | 0.989 | -2.092831  |
| GO | protein folding                                 | 5  | 139 | 0.989 | -1.5182271 |
| GO | ribosome                                        | 3  | 172 | 0.989 | -2.6577232 |
| GO | actin filament binding                          | 3  | 50  | 0.989 | -0.2342323 |
| GO | metabolic process                               | 31 | 455 | 0.989 | -0.0185063 |
| GO | metallopeptidase activity                       | 6  | 88  | 0.989 | -0.0061982 |
| GO | protein modification process                    | 9  | 145 | 0.989 | -0.3007814 |
| GO | structural molecule activity                    | 8  | 196 | 0.989 | -1.5353745 |
| GO | mitochondrial matrix                            | 5  | 147 | 0.989 | -1.6560591 |
| GO | mitochondrial nucleoid                          | 1  | 31  | 0.989 | -0.7969334 |
| GO | protein complex                                 | 8  | 153 | 0.989 | -0.7904272 |
| GO | cytoplasmic vesicle                             | 14 | 229 | 0.989 | -0.435165  |
| GO | homeostasis of number of cells within a tissue  | 1  | 15  | 0.989 | -0.0258174 |
| GO | positive regulation of protein kinase activity  | 1  | 16  | 0.989 | -0.0927387 |
| GO | regulation of translation                       | 3  | 61  | 0.989 | -0.5942032 |
| GO | spermatogenesis                                 | 16 | 261 | 0.989 | -0.4541866 |
| GO | microtubule motor activity                      | 3  | 76  | 0.989 | -0.9995167 |
| GO | microtubule-based movement                      | 3  | 84  | 0.989 | -1.187871  |
| GO | hyaluronic acid binding                         | 1  | 19  | 0.989 | -0.2716131 |
| GO | Rho protein signal transduction                 | 2  | 36  | 0.989 | -0.3044533 |
| GO | binding of sperm to zona pellucida              | 1  | 15  | 0.989 | -0.0258174 |
| GO | autophagy                                       | 2  | 36  | 0.989 | -0.3044533 |
| GO | histone binding                                 | 3  | 44  | 0.989 | -0.0043777 |
| GO | ruffle                                          | 3  | 53  | 0.989 | -0.339292  |
| GO | cysteine-type peptidase activity                | 3  | 76  | 0.989 | -0.9995167 |
| GO | structural constituent of ribosome              | 1  | 146 | 0.989 | -2.9560895 |
| GO | translation                                     | 2  | 197 | 0.989 | -3.2537784 |
| GO | ubiquitin thiolesterase activity                | 3  | 68  | 0.989 | -0.7932213 |
| GO | ubiquitin-dependent protein catabolic process   | 5  | 139 | 0.989 | -1.5182271 |
| GO | intrinsic to endoplasmic reticulum membrane     | 1  | 16  | 0.989 | -0.0927387 |
| GO | RNA polymerase II transcription factor activity | 8  | 126 | 0.989 | -0.2167289 |
| GO | kinase activity                                 | 2  | 117 | 0.989 | -2.2037494 |
| GO | metalloendopeptidase activity                   | 6  | 102 | 0.989 | -0.3822225 |
| GO | microtubule binding                             | 1  | 58  | 0.989 | -1.5447389 |
| GO | motor activity                                  | 3  | 64  | 0.989 | -0.6818948 |
| GO | post-Golgi vesicle-mediated transport           | 2  | 37  | 0.989 | -0.3448894 |
| GO | aminopeptidase activity                         | 1  | 28  | 0.989 | -0.6848042 |
| GO | collagen binding                                | 2  | 34  | 0.989 | -0.2202801 |
| GO | response to cocaine                             | 1  | 16  | 0.989 | -0.0927387 |

|                                                         |    |     |       |            |
|---------------------------------------------------------|----|-----|-------|------------|
| GO synapse assembly                                     | 2  | 33  | 0.989 | -0.1763973 |
| GO regulation of neuron differentiation                 | 1  | 19  | 0.989 | -0.2716131 |
| GO regulation of heart contraction                      | 2  | 32  | 0.989 | -0.1312076 |
| GO inactivation of MAPK activity                        | 1  | 20  | 0.989 | -0.325338  |
| GO glucose transport                                    | 1  | 22  | 0.989 | -0.4257707 |
| GO translation elongation factor activity               | 1  | 20  | 0.989 | -0.325338  |
| GO translational elongation                             | 1  | 87  | 0.989 | -2.1062764 |
| GO T cell differentiation                               | 1  | 19  | 0.989 | -0.2716131 |
| GO myelination                                          | 1  | 29  | 0.989 | -0.723245  |
| GO vasculogenesis                                       | 2  | 42  | 0.989 | -0.5329476 |
| GO regulation of translational initiation               | 1  | 24  | 0.989 | -0.518309  |
| GO translation factor activity, nucleic acid binding    | 1  | 21  | 0.989 | -0.3766422 |
| GO translation initiation factor activity               | 1  | 49  | 0.989 | -1.3315436 |
| GO translational initiation                             | 1  | 36  | 0.989 | -0.965541  |
| GO glycolysis                                           | 1  | 41  | 0.989 | -1.1165976 |
| GO synaptosome                                          | 5  | 91  | 0.989 | -0.5078876 |
| GO histone acetyltransferase activity                   | 2  | 38  | 0.989 | -0.3843114 |
| GO histone H4 acetylation                               | 1  | 15  | 0.989 | -0.0258174 |
| GO ceramide metabolic process                           | 1  | 16  | 0.989 | -0.0927387 |
| GO ER-Golgi intermediate compartment membrane           | 1  | 17  | 0.989 | -0.1556918 |
| GO lysosome organization                                | 1  | 22  | 0.989 | -0.4257707 |
| GO positive regulation of epithelial cell proliferation | 2  | 34  | 0.989 | -0.2202801 |
| GO mitochondrial outer membrane                         | 5  | 81  | 0.989 | -0.2365984 |
| GO neuronal cell body                                   | 10 | 148 | 0.989 | -0.0377794 |
| GO peroxisomal membrane                                 | 1  | 41  | 0.989 | -1.1165976 |
| GO peroxisome                                           | 1  | 92  | 0.989 | -2.1900444 |
| GO chromosome, centromeric region                       | 1  | 47  | 0.989 | -1.2803951 |
| GO fibroblast growth factor receptor signaling pathway  | 2  | 33  | 0.989 | -0.1763973 |
| GO positive regulation of cell cycle                    | 1  | 15  | 0.989 | -0.0258174 |
| GO cell development                                     | 1  | 15  | 0.989 | -0.0258174 |
| GO mesoderm development                                 | 1  | 27  | 0.989 | -0.6451903 |
| GO microtubule associated complex                       | 1  | 25  | 0.989 | -0.5620556 |
| GO protein C-terminus binding                           | 9  | 146 | 0.989 | -0.3222596 |
| GO mitochondrial membrane                               | 1  | 51  | 0.989 | -1.3811973 |
| GO protein kinase binding                               | 7  | 113 | 0.989 | -0.2704575 |
| GO GTPase binding                                       | 1  | 15  | 0.989 | -0.0258174 |
| GO G-protein-coupled receptor binding                   | 1  | 24  | 0.989 | -0.518309  |
| GO chromatin assembly or disassembly                    | 1  | 36  | 0.989 | -0.965541  |
| GO chromatin binding                                    | 7  | 156 | 0.989 | -1.166763  |
| GO chromatin                                            | 4  | 81  | 0.989 | -0.6778477 |
| GO single-stranded DNA binding                          | 3  | 49  | 0.989 | -0.1978616 |
| GO protein binding, bridging                            | 2  | 44  | 0.989 | -0.6024802 |
| GO nuclear matrix                                       | 2  | 62  | 0.989 | -1.1279564 |
| GO nuclear membrane                                     | 5  | 87  | 0.989 | -0.4029584 |
| GO ubiquitin ligase complex                             | 3  | 54  | 0.989 | -0.3730548 |
| GO late endosome                                        | 2  | 43  | 0.989 | -0.5680787 |
| GO GABA-A receptor activity                             | 1  | 19  | 0.989 | -0.2716131 |
| GO gamma-aminobutyric acid signaling pathway            | 1  | 20  | 0.989 | -0.325338  |
| GO pyridoxal phosphate binding                          | 2  | 51  | 0.989 | -0.8255526 |

|                                                             |   |     |       |            |
|-------------------------------------------------------------|---|-----|-------|------------|
| GO vesicle membrane                                         | 1 | 15  | 0.989 | -0.0258174 |
| GO manganese ion binding                                    | 1 | 32  | 0.989 | -0.8323231 |
| GO Rab GTPase binding                                       | 2 | 33  | 0.989 | -0.1763973 |
| GO isomerase activity                                       | 4 | 99  | 0.989 | -1.1046924 |
| GO generation of precursor metabolites and energy           | 3 | 55  | 0.989 | -0.4062317 |
| GO peptide hormone binding                                  | 1 | 22  | 0.989 | -0.4257707 |
| GO electron transport chain                                 | 4 | 86  | 0.989 | -0.8042978 |
| GO male genitalia development                               | 1 | 17  | 0.989 | -0.1556918 |
| GO purine ribonucleoside monophosphate biosynthetic process | 1 | 17  | 0.989 | -0.1556918 |
| GO chemotaxis                                               | 7 | 117 | 0.989 | -0.3662918 |
| GO neuron apoptosis                                         | 1 | 16  | 0.989 | -0.0927387 |
| GO anterior/posterior pattern formation                     | 4 | 81  | 0.989 | -0.6778477 |
| GO cilium                                                   | 2 | 90  | 0.989 | -1.7381864 |
| GO embryonic skeletal system morphogenesis                  | 2 | 36  | 0.989 | -0.3044533 |
| GO histone deacetylase binding                              | 2 | 39  | 0.989 | -0.4227773 |
| GO mediator complex                                         | 1 | 31  | 0.989 | -0.7969334 |
| GO proximal/distal pattern formation                        | 1 | 22  | 0.989 | -0.4257707 |
| GO DNA replication                                          | 3 | 146 | 0.989 | -2.2976321 |
| GO DNA-directed DNA polymerase activity                     | 1 | 30  | 0.989 | -0.7605964 |
| GO guanyl nucleotide binding                                | 1 | 17  | 0.989 | -0.1556918 |
| GO protein amino acid ADP-ribosylation                      | 1 | 22  | 0.989 | -0.4257707 |
| GO cellular iron ion homeostasis                            | 1 | 24  | 0.989 | -0.518309  |
| GO induction of apoptosis by intracellular signals          | 1 | 15  | 0.989 | -0.0258174 |
| GO protein ubiquitination                                   | 4 | 85  | 0.989 | -0.7795502 |
| GO negative regulation of T cell proliferation              | 1 | 18  | 0.989 | -0.2151789 |
| GO glutathione transferase activity                         | 1 | 17  | 0.989 | -0.1556918 |
| GO biosynthetic process                                     | 2 | 49  | 0.989 | -0.7647026 |
| GO cell division                                            | 6 | 246 | 0.989 | -2.7500096 |
| GO midbody                                                  | 1 | 25  | 0.989 | -0.5620556 |
| GO spindle                                                  | 3 | 90  | 0.989 | -1.319481  |
| GO MHC class I protein complex                              | 1 | 18  | 0.989 | -0.2151789 |
| GO NAD or NADH binding                                      | 1 | 37  | 0.989 | -0.9969995 |
| GO positive regulation of mitotic cell cycle                | 1 | 16  | 0.989 | -0.0927387 |
| GO heterogeneous nuclear ribonucleoprotein complex          | 1 | 15  | 0.989 | -0.0258174 |
| GO ribonucleoprotein complex                                | 1 | 95  | 0.989 | -2.2389329 |
| GO spliceosomal complex                                     | 1 | 118 | 0.989 | -2.5854018 |
| GO steroid biosynthetic process                             | 1 | 30  | 0.989 | -0.7605964 |
| GO unfolded protein binding                                 | 4 | 103 | 0.989 | -1.1901847 |
| GO G1/S transition of mitotic cell cycle                    | 2 | 42  | 0.989 | -0.5329476 |
| GO hippocampus development                                  | 1 | 20  | 0.989 | -0.325338  |
| GO lipid catabolic process                                  | 5 | 90  | 0.989 | -0.4820701 |
| GO activation of pro-apoptotic gene products                | 1 | 22  | 0.989 | -0.4257707 |
| GO cilium axoneme                                           | 1 | 26  | 0.989 | -0.6043094 |
| GO phosphoinositide-mediated signaling                      | 2 | 33  | 0.989 | -0.1763973 |
| GO Ras protein signal transduction                          | 4 | 64  | 0.989 | -0.1857124 |
| GO negative regulation of translation                       | 1 | 18  | 0.989 | -0.2151789 |
| GO acyl-CoA binding                                         | 1 | 15  | 0.989 | -0.0258174 |
| GO fatty acid beta-oxidation                                | 1 | 21  | 0.989 | -0.3766422 |
| GO platelet activation                                      | 1 | 24  | 0.989 | -0.518309  |

|    |                                                        |   |     |       |            |
|----|--------------------------------------------------------|---|-----|-------|------------|
| GO | positive regulation of T cell proliferation            | 1 | 27  | 0.989 | -0.6451903 |
| GO | brush border                                           | 1 | 22  | 0.989 | -0.4257707 |
| GO | cytokine receptor activity                             | 1 | 17  | 0.989 | -0.1556918 |
| GO | endosome membrane                                      | 5 | 92  | 0.989 | -0.5334396 |
| GO | negative regulation of gene expression                 | 1 | 23  | 0.989 | -0.4729329 |
| GO | response to activity                                   | 1 | 18  | 0.989 | -0.2151789 |
| GO | response to tumor necrosis factor                      | 1 | 17  | 0.989 | -0.1556918 |
| GO | sarcoplasmic reticulum membrane                        | 1 | 17  | 0.989 | -0.1556918 |
| GO | nuclear chromatin                                      | 1 | 16  | 0.989 | -0.0927387 |
| GO | nuclear chromosome                                     | 1 | 23  | 0.989 | -0.4729329 |
| GO | structural constituent of cytoskeleton                 | 2 | 73  | 0.989 | -1.3891833 |
| GO | protein secretion                                      | 1 | 16  | 0.989 | -0.0927387 |
| GO | intracellular membrane-bounded organelle               | 8 | 127 | 0.989 | -0.2399943 |
| GO | transcription                                          | 1 | 69  | 0.989 | -1.7759985 |
| GO | focal adhesion assembly                                | 1 | 15  | 0.989 | -0.0258174 |
| GO | coated pit                                             | 2 | 41  | 0.989 | -0.4970486 |
| GO | actin filament                                         | 1 | 28  | 0.989 | -0.6848042 |
| GO | regulation of GTPase activity                          | 1 | 16  | 0.989 | -0.0927387 |
| GO | collagen                                               | 1 | 22  | 0.989 | -0.4257707 |
| GO | enzyme activator activity                              | 1 | 40  | 0.989 | -1.0875691 |
| GO | nuclear outer membrane                                 | 1 | 20  | 0.989 | -0.325338  |
| GO | gastrulation                                           | 1 | 15  | 0.989 | -0.0258174 |
| GO | insulin secretion                                      | 1 | 23  | 0.989 | -0.4729329 |
| GO | protein N-terminus binding                             | 3 | 72  | 0.989 | -0.8988756 |
| GO | cerebral cortex development                            | 1 | 16  | 0.989 | -0.0927387 |
| GO | muscle contraction                                     | 6 | 97  | 0.989 | -0.2540433 |
| GO | myosin complex                                         | 2 | 41  | 0.989 | -0.4970486 |
| GO | regulation of protein localization                     | 1 | 18  | 0.989 | -0.2151789 |
| GO | centrosome                                             | 2 | 117 | 0.989 | -2.2037494 |
| GO | neuron development                                     | 1 | 27  | 0.989 | -0.6451903 |
| GO | 4 iron, 4 sulfur cluster binding                       | 1 | 25  | 0.989 | -0.5620556 |
| GO | tricarboxylic acid cycle                               | 1 | 21  | 0.989 | -0.3766422 |
| GO | hair follicle morphogenesis                            | 1 | 16  | 0.989 | -0.0927387 |
| GO | cation transport                                       | 2 | 65  | 0.989 | -1.202663  |
| GO | nucleotidyltransferase activity                        | 2 | 71  | 0.989 | -1.344131  |
| GO | mitochondrial proton-transporting ATP synthase complex | 1 | 16  | 0.989 | -0.0927387 |
| GO | endopeptidase activity                                 | 1 | 15  | 0.989 | -0.0258174 |
| GO | amino acid binding                                     | 1 | 15  | 0.989 | -0.0258174 |
| GO | cellular amino acid biosynthetic process               | 1 | 24  | 0.989 | -0.518309  |
| GO | cofactor binding                                       | 1 | 19  | 0.989 | -0.2716131 |
| GO | acid-amino acid ligase activity                        | 2 | 34  | 0.989 | -0.2202801 |
| GO | kinase binding                                         | 1 | 27  | 0.989 | -0.6451903 |
| GO | neuron projection                                      | 2 | 60  | 0.989 | -1.0764977 |
| GO | protein polyubiquitination                             | 1 | 25  | 0.989 | -0.5620556 |
| GO | chromosome                                             | 2 | 135 | 0.989 | -2.4736529 |
| GO | nucleosome assembly                                    | 1 | 65  | 0.989 | -1.6950268 |
| GO | nucleosome                                             | 1 | 52  | 0.989 | -1.4054996 |
| GO | trans-Golgi network                                    | 3 | 51  | 0.989 | -0.269908  |
| GO | SNAP receptor activity                                 | 1 | 20  | 0.989 | -0.325338  |

|    |                                                                            |   |     |       |            |
|----|----------------------------------------------------------------------------|---|-----|-------|------------|
| GO | peptidyl-prolyl cis-trans isomerase activity                               | 1 | 32  | 0.989 | -0.8323231 |
| GO | phototransduction                                                          | 1 | 21  | 0.989 | -0.3766422 |
| GO | calcium channel activity                                                   | 3 | 44  | 0.989 | -0.0043777 |
| GO | microtubule organizing center                                              | 4 | 96  | 0.989 | -1.0385911 |
| GO | lactation                                                                  | 1 | 28  | 0.989 | -0.6848042 |
| GO | negative regulation of angiogenesis                                        | 1 | 28  | 0.989 | -0.6848042 |
| GO | response to UV                                                             | 1 | 30  | 0.989 | -0.7605964 |
| GO | sex differentiation                                                        | 1 | 23  | 0.989 | -0.4729329 |
| GO | cis-Golgi network                                                          | 1 | 17  | 0.989 | -0.1556918 |
| GO | methyltransferase activity                                                 | 2 | 106 | 0.989 | -2.02441   |
| GO | N-acetyltransferase activity                                               | 1 | 20  | 0.989 | -0.325338  |
| GO | spindle pole                                                               | 2 | 50  | 0.989 | -0.7953911 |
| GO | endoplasmic reticulum unfolded protein response                            | 1 | 20  | 0.989 | -0.325338  |
| GO | ubiquitin-specific protease activity                                       | 1 | 28  | 0.989 | -0.6848042 |
| GO | ATP-dependent helicase activity                                            | 2 | 61  | 0.989 | -1.1024    |
| GO | helicase activity                                                          | 5 | 107 | 0.989 | -0.8887029 |
| GO | filopodium                                                                 | 1 | 25  | 0.989 | -0.5620556 |
| GO | intracellular transport                                                    | 1 | 17  | 0.989 | -0.1556918 |
| GO | cAMP binding                                                               | 1 | 17  | 0.989 | -0.1556918 |
| GO | cAMP-dependent protein kinase regulator activity                           | 1 | 16  | 0.989 | -0.0927387 |
| GO | MAPKKK cascade                                                             | 1 | 31  | 0.989 | -0.7969334 |
| GO | cytokinesis                                                                | 1 | 34  | 0.989 | -0.9004979 |
| GO | cardiac muscle contraction                                                 | 1 | 17  | 0.989 | -0.1556918 |
| GO | anaphase-promoting complex-dependent proteasomal ubiquitin-depe            | 3 | 63  | 0.989 | -0.6530869 |
| GO | negative regulation of ubiquitin-protein ligase activity involved in mitc  | 3 | 62  | 0.989 | -0.6238613 |
| GO | positive regulation of ubiquitin-protein ligase activity involved in mitot | 3 | 65  | 0.989 | -0.7102992 |
| GO | proteasome complex                                                         | 3 | 56  | 0.989 | -0.438846  |
| GO | triglyceride lipase activity                                               | 1 | 16  | 0.989 | -0.0927387 |
| GO | late endosome membrane                                                     | 1 | 51  | 0.989 | -1.3811973 |
| GO | protein amino acid N-linked glycosylation                                  | 1 | 15  | 0.989 | -0.0258174 |
| GO | ARF guanyl-nucleotide exchange factor activity                             | 1 | 17  | 0.989 | -0.1556918 |
| GO | regulation of ARF protein signal transduction                              | 1 | 16  | 0.989 | -0.0927387 |
| GO | peroxidase activity                                                        | 1 | 17  | 0.989 | -0.1556918 |
| GO | dephosphorylation                                                          | 1 | 21  | 0.989 | -0.3766422 |
| GO | embryonic skeletal system development                                      | 1 | 23  | 0.989 | -0.4729329 |
| GO | voltage-gated sodium channel activity                                      | 1 | 15  | 0.989 | -0.0258174 |
| GO | metal ion transmembrane transporter activity                               | 1 | 16  | 0.989 | -0.0927387 |
| GO | metal ion transport                                                        | 1 | 20  | 0.989 | -0.325338  |
| GO | zinc ion transport                                                         | 1 | 24  | 0.989 | -0.518309  |
| GO | defense response to bacterium                                              | 4 | 75  | 0.989 | -0.5163078 |
| GO | positive regulation of protein ubiquitination                              | 1 | 25  | 0.989 | -0.5620556 |
| GO | vesicle                                                                    | 1 | 17  | 0.989 | -0.1556918 |
| GO | chemoattractant activity                                                   | 1 | 15  | 0.989 | -0.0258174 |
| GO | germ cell development                                                      | 1 | 22  | 0.989 | -0.4257707 |
| GO | growth                                                                     | 1 | 29  | 0.989 | -0.723245  |
| GO | positive regulation of endothelial cell proliferation                      | 2 | 31  | 0.989 | -0.0846181 |
| GO | neurotransmitter transport                                                 | 1 | 40  | 0.989 | -1.0875691 |
| GO | amino acid transport                                                       | 1 | 46  | 0.989 | -1.2542207 |
| GO | SWI/SNF complex                                                            | 1 | 15  | 0.989 | -0.0258174 |

|                                                           |   |     |       |            |
|-----------------------------------------------------------|---|-----|-------|------------|
| GO growth cone                                            | 3 | 58  | 0.989 | -0.502473  |
| GO keratinization                                         | 1 | 31  | 0.989 | -0.7969334 |
| GO vesicle docking involved in exocytosis                 | 1 | 19  | 0.989 | -0.2716131 |
| GO mannose binding                                        | 1 | 16  | 0.989 | -0.0927387 |
| GO non-membrane spanning protein tyrosine kinase activity | 1 | 40  | 0.989 | -1.0875691 |
| GO endocytic vesicle membrane                             | 1 | 22  | 0.989 | -0.4257707 |
| GO hydrogen peroxide catabolic process                    | 1 | 16  | 0.989 | -0.0927387 |
| GO thymus development                                     | 1 | 23  | 0.989 | -0.4729329 |
| GO response to zinc ion                                   | 1 | 18  | 0.989 | -0.2151789 |
| GO C-C chemokine receptor activity                        | 1 | 16  | 0.989 | -0.0927387 |
| GO cell leading edge                                      | 1 | 17  | 0.989 | -0.1556918 |
| GO DNA fragmentation involved in apoptotic nuclear change | 1 | 18  | 0.989 | -0.2151789 |
| GO base-excision repair                                   | 1 | 19  | 0.989 | -0.2716131 |
| GO damaged DNA binding                                    | 1 | 44  | 0.989 | -1.2005828 |
| GO nucleotide-excision repair                             | 1 | 26  | 0.989 | -0.6043094 |
| GO iron ion transport                                     | 1 | 22  | 0.989 | -0.4257707 |
| GO flagellum                                              | 1 | 19  | 0.989 | -0.2716131 |
| GO phospholipid transport                                 | 1 | 18  | 0.989 | -0.2151789 |
| GO nuclear chromosome, telomeric region                   | 1 | 16  | 0.989 | -0.0927387 |
| GO telomere maintenance                                   | 1 | 19  | 0.989 | -0.2716131 |
| GO cell adhesion molecule binding                         | 1 | 15  | 0.989 | -0.0258174 |
| GO nucleoside metabolic process                           | 1 | 16  | 0.989 | -0.0927387 |
| GO nucleoside-triphosphatase activity                     | 1 | 59  | 0.989 | -1.5669486 |
| GO protein serine/threonine phosphatase activity          | 1 | 37  | 0.989 | -0.9969995 |
| GO estrogen receptor binding                              | 1 | 15  | 0.989 | -0.0258174 |
| GO diacylglycerol kinase activity                         | 1 | 15  | 0.989 | -0.0258174 |
| GO fertilization                                          | 1 | 17  | 0.989 | -0.1556918 |
| GO mRNA 3'-UTR binding                                    | 1 | 17  | 0.989 | -0.1556918 |
| GO high-density lipoprotein particle                      | 1 | 19  | 0.989 | -0.2716131 |
| GO very-low-density lipoprotein particle                  | 1 | 19  | 0.989 | -0.2716131 |
| GO T cell receptor signaling pathway                      | 1 | 22  | 0.989 | -0.4257707 |
| GO endonuclease activity                                  | 1 | 57  | 0.989 | -1.5222605 |
| GO gastrulation with mouth forming second                 | 1 | 21  | 0.989 | -0.3766422 |
| GO positive regulation of cell adhesion                   | 1 | 20  | 0.989 | -0.325338  |
| GO cellular membrane fusion                               | 1 | 22  | 0.989 | -0.4257707 |
| GO neuropeptide hormone activity                          | 1 | 21  | 0.989 | -0.3766422 |
| GO mitosis                                                | 1 | 199 | 0.989 | -3.5585578 |
| GO MAP kinase kinase kinase activity                      | 1 | 15  | 0.989 | -0.0258174 |
| GO growth factor binding                                  | 1 | 23  | 0.989 | -0.4729329 |
| GO peptidyl-threonine phosphorylation                     | 1 | 18  | 0.989 | -0.2151789 |
| GO neuromuscular junction                                 | 1 | 24  | 0.989 | -0.518309  |
| GO endosome transport                                     | 1 | 21  | 0.989 | -0.3766422 |
| GO thyroid hormone receptor binding                       | 1 | 25  | 0.989 | -0.5620556 |
| GO RNA metabolic process                                  | 1 | 19  | 0.989 | -0.2716131 |
| GO N-acetylglucosamine metabolic process                  | 1 | 15  | 0.989 | -0.0258174 |
| GO cholesterol binding                                    | 1 | 18  | 0.989 | -0.2151789 |
| GO cholesterol efflux                                     | 1 | 19  | 0.989 | -0.2716131 |
| GO reverse cholesterol transport                          | 1 | 15  | 0.989 | -0.0258174 |
| GO histone methyltransferase complex                      | 1 | 17  | 0.989 | -0.1556918 |

|    |                                               |   |    |          |            |
|----|-----------------------------------------------|---|----|----------|------------|
| GO | phosphoprotein phosphatase inhibitor activity | 1 | 18 | 0.989    | -0.2151789 |
| GO | protein targeting to mitochondrion            | 1 | 25 | 0.989    | -0.5620556 |
| GO | regulation of endocytosis                     | 1 | 15 | 0.989    | -0.0258174 |
| GO | male germ cell nucleus                        | 1 | 15 | 0.989    | -0.0258174 |
| GO | reciprocal meiotic recombination              | 1 | 22 | 0.989    | -0.4257707 |
| GO | synapsis                                      | 1 | 5  | 0.298138 | 1.16672207 |



score (z)
