# Supplementary material
Source: PubMed Central journal article supplement (PMC4070715)
Supplement: NIHMS587873-supplement-Supplement_2.pdf [file NIHMS587873-supplement-Supplement_2.pdf]

| Category | Term                                                      | Count | Count i | P-value  | Enrichment s |
|----------|-----------------------------------------------------------|-------|---------|----------|--------------|
| GO       | heart development                                         | 16    | 114     | 7.38E-05 | 4.7787742    |
| GO       | maternal process involved in parturition                  | 3     | 3       | 9.99E-05 | 7.8486767    |
| GO       | cytoplasm                                                 | 247   | 4355    | 0.000189 | 3.66964816   |
| GO       | actin binding                                             | 27    | 278     | 0.00025  | 4.04491742   |
| GO       | collagen                                                  | 6     | 22      | 0.000388 | 5.04628974   |
| GO       | synapse assembly                                          | 7     | 33      | 0.000673 | 4.5264191    |
| GO       | positive regulation of Wnt receptor signaling pathway     | 4     | 10      | 0.000775 | 5.31408652   |
| GO       | thrombin receptor activity                                | 3     | 5       | 0.00093  | 5.8824651    |
| GO       | negative regulation of chondrocyte differentiation        | 3     | 5       | 0.00093  | 5.8824651    |
| GO       | negative regulation of DNA recombination                  | 3     | 5       | 0.00093  | 5.8824651    |
| GO       | collagen fibril organization                              | 6     | 26      | 0.001021 | 4.46916161   |
| GO       | nucleoplasm                                               | 36    | 455     | 0.001347 | 3.35258385   |
| GO       | actomyosin structure organization                         | 3     | 6       | 0.001797 | 5.27996371   |
| GO       | collagen type IV                                          | 3     | 6       | 0.001797 | 5.27996371   |
| GO       | negative regulation of protein import into nucleus        | 2     | 2       | 0.002155 | 6.40824895   |
| GO       | regulation of acetylcholine secretion                     | 2     | 2       | 0.002155 | 6.40824895   |
| GO       | DNA replication, removal of RNA primer                    | 2     | 2       | 0.002155 | 6.40824895   |
| GO       | negative regulation of mitotic recombination              | 2     | 2       | 0.002155 | 6.40824895   |
| GO       | CCR2 chemokine receptor binding                           | 2     | 2       | 0.002155 | 6.40824895   |
| GO       | ectoderm and mesoderm interaction                         | 2     | 2       | 0.002155 | 6.40824895   |
| GO       | regulation of smooth muscle contraction                   | 4     | 13      | 0.002359 | 4.47744548   |
| GO       | DNA recombination                                         | 8     | 52      | 0.002569 | 3.68526535   |
| GO       | proximal/distal pattern formation                         | 5     | 22      | 0.002906 | 4.03262292   |
| GO       | positive regulation of filopodium assembly                | 3     | 7       | 0.003036 | 4.80499827   |
| GO       | positive regulation of Notch signaling pathway            | 3     | 7       | 0.003036 | 4.80499827   |
| GO       | DNA replication                                           | 15    | 146     | 0.003293 | 3.24481458   |
| GO       | damaged DNA binding                                       | 7     | 44      | 0.00388  | 3.55473995   |
| GO       | cell projection                                           | 11    | 94      | 0.004175 | 3.2596203    |
| GO       | response to drug                                          | 20    | 225     | 0.004232 | 3.04347188   |
| GO       | cell junction                                             | 30    | 387     | 0.004373 | 2.93501822   |
| GO       | DNA repair                                                | 17    | 182     | 0.004901 | 3.02511904   |
| GO       | organ regeneration                                        | 6     | 35      | 0.005046 | 3.51681207   |
| GO       | fat cell differentiation                                  | 5     | 25      | 0.005225 | 3.6507357    |
| GO       | muscle contraction                                        | 11    | 97      | 0.005308 | 3.14167838   |
| GO       | induction of apoptosis                                    | 16    | 170     | 0.005796 | 2.96700936   |
| GO       | collagen type V                                           | 2     | 3       | 0.006264 | 5.1050277    |
| GO       | branching morphogenesis of a nerve                        | 2     | 3       | 0.006264 | 5.1050277    |
| GO       | 5'-flap endonuclease activity                             | 2     | 3       | 0.006264 | 5.1050277    |
| GO       | positive regulation of myeloid cell differentiation       | 2     | 3       | 0.006264 | 5.1050277    |
| GO       | positive regulation of muscle cell differentiation        | 2     | 3       | 0.006264 | 5.1050277    |
| GO       | guanyl-nucleotide exchange factor complex                 | 2     | 3       | 0.006264 | 5.1050277    |
| GO       | prostatic bud formation                                   | 2     | 3       | 0.006264 | 5.1050277    |
| GO       | very-low-density lipoprotein particle clearance           | 2     | 3       | 0.006264 | 5.1050277    |
| GO       | negative regulation of cell adhesion mediated by integrin | 2     | 3       | 0.006264 | 5.1050277    |
| GO       | regulation of cyclin-dependent protein kinase activity    | 6     | 37      | 0.006682 | 3.34799113   |
| GO       | mitochondrial large ribosomal subunit                     | 4     | 17      | 0.006772 | 3.70163201   |
| GO       | Notch binding                                             | 3     | 9       | 0.006794 | 4.09067424   |
| GO       | auditory receptor cell differentiation                    | 3     | 9       | 0.006794 | 4.09067424   |

|                                                           |     |      |          |            |
|-----------------------------------------------------------|-----|------|----------|------------|
| GO female pregnancy                                       | 8   | 61   | 0.006976 | 3.14865318 |
| GO DNA-dependent ATPase activity                          | 5   | 27   | 0.007355 | 3.42810461 |
| GO sarcomere                                              | 5   | 27   | 0.007355 | 3.42810461 |
| GO polypeptide N-acetylgalactosaminyltransferase activity | 4   | 18   | 0.008391 | 3.54539354 |
| GO pituitary gland development                            | 4   | 18   | 0.008391 | 3.54539354 |
| GO actin filament                                         | 5   | 28   | 0.008618 | 3.32468406 |
| GO CTP biosynthetic process                               | 3   | 10   | 0.009373 | 3.811051   |
| GO embryonic digestive tract development                  | 3   | 10   | 0.009373 | 3.811051   |
| GO negative regulation of blood coagulation               | 3   | 10   | 0.009373 | 3.811051   |
| GO actin cytoskeleton                                     | 13  | 134  | 0.009557 | 2.79160476 |
| GO mRNA export from nucleus                               | 5   | 29   | 0.010023 | 3.22593343 |
| GO chromosome                                             | 13  | 135  | 0.010141 | 2.76225848 |
| GO methyltransferase activity                             | 11  | 106  | 0.010205 | 2.81260799 |
| GO heterophilic cell-cell adhesion                        | 4   | 19   | 0.010245 | 3.40026933 |
| GO collagen catabolic process                             | 4   | 19   | 0.010245 | 3.40026933 |
| GO basolateral plasma membrane                            | 11  | 107  | 0.010913 | 2.77811331 |
| GO eye morphogenesis                                      | 2   | 4    | 0.012143 | 4.31084526 |
| GO apicolateral plasma membrane                           | 2   | 4    | 0.012143 | 4.31084526 |
| GO DNA (cytosine-5-)-methyltransferase activity           | 2   | 4    | 0.012143 | 4.31084526 |
| GO lipoxygenase pathway                                   | 2   | 4    | 0.012143 | 4.31084526 |
| GO DNA-directed RNA polymerase I complex                  | 2   | 4    | 0.012143 | 4.31084526 |
| GO chylomicron remnant clearance                          | 2   | 4    | 0.012143 | 4.31084526 |
| GO regulation of axon extension                           | 2   | 4    | 0.012143 | 4.31084526 |
| GO saliva secretion                                       | 2   | 4    | 0.012143 | 4.31084526 |
| GO regulation of DNA recombination                        | 2   | 4    | 0.012143 | 4.31084526 |
| GO response to methylmercury                              | 2   | 4    | 0.012143 | 4.31084526 |
| GO guanine/thymine mispair binding                        | 2   | 4    | 0.012143 | 4.31084526 |
| GO regulation of G2/M transition of mitotic cell cycle    | 2   | 4    | 0.012143 | 4.31084526 |
| GO ATP-dependent 3'-5' DNA helicase activity              | 2   | 4    | 0.012143 | 4.31084526 |
| GO DNA strand annealing activity                          | 2   | 4    | 0.012143 | 4.31084526 |
| GO muscle thin filament tropomyosin                       | 2   | 4    | 0.012143 | 4.31084526 |
| GO gamma-aminobutyric acid signaling pathway              | 4   | 20   | 0.012344 | 3.26488694 |
| GO tissue regeneration                                    | 4   | 20   | 0.012344 | 3.26488694 |
| GO transforming growth factor beta receptor activity      | 3   | 11   | 0.012448 | 3.56723153 |
| GO negative regulation of DNA binding                     | 3   | 11   | 0.012448 | 3.56723153 |
| GO positive regulation of endothelial cell proliferation  | 5   | 31   | 0.01329  | 3.04096308 |
| GO protein binding                                        | 321 | 6249 | 0.013619 | 2.25858379 |
| GO cell cycle                                             | 32  | 458  | 0.014412 | 2.41149164 |
| GO protein kinase inhibitor activity                      | 4   | 21   | 0.0147   | 3.13810301 |
| GO mitotic chromosome condensation                        | 3   | 12   | 0.016033 | 3.35172733 |
| GO blastocyst development                                 | 3   | 12   | 0.016033 | 3.35172733 |
| GO NLS-bearing substrate import into nucleus              | 3   | 12   | 0.016033 | 3.35172733 |
| GO rRNA transcription                                     | 3   | 12   | 0.016033 | 3.35172733 |
| GO adrenal gland development                              | 3   | 12   | 0.016033 | 3.35172733 |
| GO dendrite                                               | 12  | 128  | 0.016044 | 2.55183931 |
| GO isomerase activity                                     | 10  | 99   | 0.016622 | 2.5866513  |
| GO actin cytoskeleton organization                        | 11  | 114  | 0.016966 | 2.54684774 |
| GO positive regulation of neuron differentiation          | 4   | 22   | 0.01732  | 3.0189561  |
| GO condensin complex                                      | 2   | 5    | 0.019618 | 3.75713179 |

|    |                                                                      |    |     |          |            |
|----|----------------------------------------------------------------------|----|-----|----------|------------|
| GO | hemidesmosome                                                        | 2  | 5   | 0.019618 | 3.75713179 |
| GO | cAMP-dependent protein kinase inhibitor activity                     | 2  | 5   | 0.019618 | 3.75713179 |
| GO | negative regulation of oligodendrocyte differentiation               | 2  | 5   | 0.019618 | 3.75713179 |
| GO | positive regulation of triglyceride biosynthetic process             | 2  | 5   | 0.019618 | 3.75713179 |
| GO | nuclear origin of replication recognition complex                    | 2  | 5   | 0.019618 | 3.75713179 |
| GO | activated T cell proliferation                                       | 2  | 5   | 0.019618 | 3.75713179 |
| GO | spinal cord association neuron differentiation                       | 2  | 5   | 0.019618 | 3.75713179 |
| GO | profilin binding                                                     | 2  | 5   | 0.019618 | 3.75713179 |
| GO | phosphatidylcholine-sterol O-acyltransferase activator activity      | 2  | 5   | 0.019618 | 3.75713179 |
| GO | lysosomal transport                                                  | 2  | 5   | 0.019618 | 3.75713179 |
| GO | positive regulation of penile erection                               | 2  | 5   | 0.019618 | 3.75713179 |
| GO | pattern recognition receptor activity                                | 2  | 5   | 0.019618 | 3.75713179 |
| GO | regulation of cell proliferation                                     | 8  | 73  | 0.019642 | 2.56861124 |
| GO | cortical actin cytoskeleton organization                             | 3  | 13  | 0.020135 | 3.15909193 |
| GO | positive regulation of smooth muscle contraction                     | 3  | 13  | 0.020135 | 3.15909193 |
| GO | negative regulation of Wnt receptor signaling pathway through beta-c | 3  | 13  | 0.020135 | 3.15909193 |
| GO | embryonic skeletal system development                                | 4  | 23  | 0.020215 | 2.90663095 |
| GO | growth factor binding                                                | 4  | 23  | 0.020215 | 2.90663095 |
| GO | structural molecule activity                                         | 16 | 196 | 0.020689 | 2.35315212 |
| GO | RNA binding                                                          | 37 | 562 | 0.021099 | 2.21766831 |
| GO | interspecies interaction between organisms                           | 21 | 280 | 0.021382 | 2.28755264 |
| GO | postsynaptic membrane                                                | 13 | 149 | 0.021572 | 2.37615453 |
| GO | transmembrane receptor protein tyrosine kinase activity              | 5  | 35  | 0.02182  | 2.71287618 |
| GO | kidney development                                                   | 7  | 61  | 0.022468 | 2.53927267 |
| GO | homophilic cell adhesion                                             | 12 | 135 | 0.023387 | 2.35183035 |
| GO | G-protein-coupled receptor binding                                   | 4  | 24  | 0.023389 | 2.80043095 |
| GO | single-stranded RNA binding                                          | 3  | 14  | 0.024758 | 2.98525468 |
| GO | response to X-ray                                                    | 3  | 14  | 0.024758 | 2.98525468 |
| GO | tubulin binding                                                      | 3  | 14  | 0.024758 | 2.98525468 |
| GO | artery morphogenesis                                                 | 3  | 14  | 0.024758 | 2.98525468 |
| GO | anatomical structure formation involved in morphogenesis             | 3  | 14  | 0.024758 | 2.98525468 |
| GO | identical protein binding                                            | 24 | 338 | 0.026265 | 2.16516909 |
| GO | stress fiber                                                         | 4  | 25  | 0.026848 | 2.69975673 |
| GO | osteoblast differentiation                                           | 4  | 25  | 0.026848 | 2.69975673 |
| GO | heterotrimeric G-protein complex                                     | 4  | 25  | 0.026848 | 2.69975673 |
| GO | response to DNA damage stimulus                                      | 8  | 78  | 0.028053 | 2.36005254 |
| GO | intronless viral mRNA export from host nucleus                       | 2  | 6   | 0.028528 | 3.33975763 |
| GO | transcription export complex                                         | 2  | 6   | 0.028528 | 3.33975763 |
| GO | behavioral response to nicotine                                      | 2  | 6   | 0.028528 | 3.33975763 |
| GO | thyroid hormone generation                                           | 2  | 6   | 0.028528 | 3.33975763 |
| GO | forebrain neuron differentiation                                     | 2  | 6   | 0.028528 | 3.33975763 |
| GO | deoxyribonuclease activity                                           | 2  | 6   | 0.028528 | 3.33975763 |
| GO | regulation of blood coagulation                                      | 2  | 6   | 0.028528 | 3.33975763 |
| GO | mitochondrial intermembrane space protein transporter complex        | 2  | 6   | 0.028528 | 3.33975763 |
| GO | protein import into mitochondrial inner membrane                     | 2  | 6   | 0.028528 | 3.33975763 |
| GO | response to dietary excess                                           | 2  | 6   | 0.028528 | 3.33975763 |
| GO | cerebellar Purkinje cell differentiation                             | 2  | 6   | 0.028528 | 3.33975763 |
| GO | DNA replication origin binding                                       | 2  | 6   | 0.028528 | 3.33975763 |
| GO | somatic hypermutation of immunoglobulin genes                        | 2  | 6   | 0.028528 | 3.33975763 |

|                                                                          |    |     |          |            |
|--------------------------------------------------------------------------|----|-----|----------|------------|
| GO response to folic acid                                                | 2  | 6   | 0.028528 | 3.33975763 |
| GO sarcoglycan complex                                                   | 2  | 6   | 0.028528 | 3.33975763 |
| GO parathyroid gland development                                         | 2  | 6   | 0.028528 | 3.33975763 |
| GO heart contraction                                                     | 2  | 6   | 0.028528 | 3.33975763 |
| GO cell cycle arrest                                                     | 10 | 108 | 0.028605 | 2.28545436 |
| GO induction of apoptosis by intracellular signals                       | 3  | 15  | 0.029902 | 2.8271025  |
| GO digestive tract development                                           | 3  | 15  | 0.029902 | 2.8271025  |
| GO N-acetylglucosamine metabolic process                                 | 3  | 15  | 0.029902 | 2.8271025  |
| GO forebrain development                                                 | 6  | 51  | 0.030028 | 2.41951502 |
| GO nucleotide-excision repair                                            | 4  | 26  | 0.030598 | 2.60408925 |
| GO triglyceride metabolic process                                        | 4  | 26  | 0.030598 | 2.60408925 |
| GO branching involved in ureteric bud morphogenesis                      | 4  | 26  | 0.030598 | 2.60408925 |
| GO skeletal system development                                           | 11 | 125 | 0.031093 | 2.21507036 |
| GO cytoskeleton                                                          | 40 | 635 | 0.031604 | 2.01558132 |
| GO ureteric bud development                                              | 5  | 39  | 0.033285 | 2.42876491 |
| GO adherens junction                                                     | 4  | 27  | 0.03464  | 2.51297642 |
| GO response to wounding                                                  | 6  | 53  | 0.03544  | 2.31283812 |
| GO lateral plasma membrane                                               | 3  | 16  | 0.035563 | 2.68220749 |
| GO negative regulation of endothelial cell proliferation                 | 3  | 16  | 0.035563 | 2.68220749 |
| GO mismatch repair                                                       | 3  | 16  | 0.035563 | 2.68220749 |
| GO neuron fate commitment                                                | 3  | 16  | 0.035563 | 2.68220749 |
| GO blood vessel development                                              | 5  | 40  | 0.036639 | 2.36334607 |
| GO anti-apoptosis                                                        | 14 | 178 | 0.038176 | 2.05154979 |
| GO cell division                                                         | 18 | 246 | 0.038621 | 2.00500232 |
| GO aging                                                                 | 8  | 83  | 0.038675 | 2.16678206 |
| GO Arp2/3 protein complex                                                | 2  | 7   | 0.038725 | 3.00866917 |
| GO small nucleolar ribonucleoprotein complex                             | 2  | 7   | 0.038725 | 3.00866917 |
| GO DNA damage response, signal transduction by p53 class mediator res    | 2  | 7   | 0.038725 | 3.00866917 |
| GO regulation of transcription from RNA polymerase III promoter          | 2  | 7   | 0.038725 | 3.00866917 |
| GO tRNA modification                                                     | 2  | 7   | 0.038725 | 3.00866917 |
| GO detection of mechanical stimulus involved in sensory perception of sc | 2  | 7   | 0.038725 | 3.00866917 |
| GO suckling behavior                                                     | 2  | 7   | 0.038725 | 3.00866917 |
| GO positive regulation of blood coagulation                              | 2  | 7   | 0.038725 | 3.00866917 |
| GO protein heterotetramerization                                         | 2  | 7   | 0.038725 | 3.00866917 |
| GO branched chain family amino acid catabolic process                    | 2  | 7   | 0.038725 | 3.00866917 |
| GO receptor clustering                                                   | 2  | 7   | 0.038725 | 3.00866917 |
| GO negative regulation of fatty acid biosynthetic process                | 2  | 7   | 0.038725 | 3.00866917 |
| GO positive regulation of cholesterol esterification                     | 2  | 7   | 0.038725 | 3.00866917 |
| GO response to reactive oxygen species                                   | 2  | 7   | 0.038725 | 3.00866917 |
| GO negative regulation of smooth muscle cell migration                   | 2  | 7   | 0.038725 | 3.00866917 |
| GO G2 phase of mitotic cell cycle                                        | 2  | 7   | 0.038725 | 3.00866917 |
| GO postreplication repair                                                | 2  | 7   | 0.038725 | 3.00866917 |
| GO spinal cord development                                               | 2  | 7   | 0.038725 | 3.00866917 |
| GO sympathetic nervous system development                                | 2  | 7   | 0.038725 | 3.00866917 |
| GO 3',5'-cyclic-GMP phosphodiesterase activity                           | 2  | 7   | 0.038725 | 3.00866917 |
| GO cAMP catabolic process                                                | 2  | 7   | 0.038725 | 3.00866917 |
| GO signal peptide processing                                             | 2  | 7   | 0.038725 | 3.00866917 |
| GO transcription                                                         | 7  | 69  | 0.04058  | 2.1751121  |
| GO extracellular matrix structural constituent                           | 7  | 69  | 0.04058  | 2.1751121  |

|                                                                            |    |     |          |            |
|----------------------------------------------------------------------------|----|-----|----------|------------|
| GO fatty acid binding                                                      | 3  | 17  | 0.041732 | 2.54864376 |
| GO cardiac muscle contraction                                              | 3  | 17  | 0.041732 | 2.54864376 |
| GO lipid binding                                                           | 10 | 116 | 0.04354  | 2.04128043 |
| GO G1/S transition of mitotic cell cycle                                   | 5  | 42  | 0.043948 | 2.23833057 |
| GO chromosome segregation                                                  | 5  | 42  | 0.043948 | 2.23833057 |
| GO RNA splicing                                                            | 18 | 251 | 0.045495 | 1.91508361 |
| GO cell adhesion                                                           | 33 | 522 | 0.045547 | 1.84677357 |
| GO regulation of myelination                                               | 1  | 1   | 0.046443 | 4.53119698 |
| GO regulation of myosin II filament assembly or disassembly                | 1  | 1   | 0.046443 | 4.53119698 |
| GO D5 dopamine receptor binding                                            | 1  | 1   | 0.046443 | 4.53119698 |
| GO positive regulation of locomotion                                       | 1  | 1   | 0.046443 | 4.53119698 |
| GO D-ribose catabolic process                                              | 1  | 1   | 0.046443 | 4.53119698 |
| GO ribonucleoside diphosphate catabolic process                            | 1  | 1   | 0.046443 | 4.53119698 |
| GO meiosis I                                                               | 1  | 1   | 0.046443 | 4.53119698 |
| GO stem cell development                                                   | 1  | 1   | 0.046443 | 4.53119698 |
| GO integrin biosynthetic process                                           | 1  | 1   | 0.046443 | 4.53119698 |
| GO glycerate kinase activity                                               | 1  | 1   | 0.046443 | 4.53119698 |
| GO nuclear mRNA 5'-splice site recognition                                 | 1  | 1   | 0.046443 | 4.53119698 |
| GO coumarin metabolic process                                              | 1  | 1   | 0.046443 | 4.53119698 |
| GO dibenzo-p-dioxin catabolic process                                      | 1  | 1   | 0.046443 | 4.53119698 |
| GO flavonoid 3'-monooxygenase activity                                     | 1  | 1   | 0.046443 | 4.53119698 |
| GO flavonoid metabolic process                                             | 1  | 1   | 0.046443 | 4.53119698 |
| GO insecticide metabolic process                                           | 1  | 1   | 0.046443 | 4.53119698 |
| GO oxidoreductase activity, acting on diphenols and related substances a   | 1  | 1   | 0.046443 | 4.53119698 |
| GO response to herbicide                                                   | 1  | 1   | 0.046443 | 4.53119698 |
| GO response to iron(III) ion                                               | 1  | 1   | 0.046443 | 4.53119698 |
| GO (S)-2-(5-amino-1-(5-phospho-D-ribosyl)imidazole-4-carboxamido)succ      | 1  | 1   | 0.046443 | 4.53119698 |
| GO N6-(1,2-dicarboxyethyl)AMP AMP-lyase (fumarate-forming) activity        | 1  | 1   | 0.046443 | 4.53119698 |
| GO deoxyguanosine kinase activity                                          | 1  | 1   | 0.046443 | 4.53119698 |
| GO dGTP metabolic process                                                  | 1  | 1   | 0.046443 | 4.53119698 |
| GO guanosine metabolic process                                             | 1  | 1   | 0.046443 | 4.53119698 |
| GO site-specific endodeoxyribonuclease activity, specific for altered base | 1  | 1   | 0.046443 | 4.53119698 |
| GO euchromatin                                                             | 1  | 1   | 0.046443 | 4.53119698 |
| GO dTDP biosynthetic process                                               | 1  | 1   | 0.046443 | 4.53119698 |
| GO nucleoside phosphate kinase activity                                    | 1  | 1   | 0.046443 | 4.53119698 |
| GO thymidylate kinase activity                                             | 1  | 1   | 0.046443 | 4.53119698 |
| GO alpha-1,4-N-acetylgalactosaminyltransferase activity                    | 1  | 1   | 0.046443 | 4.53119698 |
| GO mesodermal cell fate specification                                      | 1  | 1   | 0.046443 | 4.53119698 |
| GO nucleus accumbens development                                           | 1  | 1   | 0.046443 | 4.53119698 |
| GO optic cup morphogenesis involved in camera-type eye development         | 1  | 1   | 0.046443 | 4.53119698 |
| GO ferredoxin-NADP+ reductase activity                                     | 1  | 1   | 0.046443 | 4.53119698 |
| GO double-stranded DNA specific exodeoxyribonuclease activity              | 1  | 1   | 0.046443 | 4.53119698 |
| GO regulation of calcium ion transport via store-operated calcium channe   | 1  | 1   | 0.046443 | 4.53119698 |
| GO ribose-5-phosphate isomerase activity                                   | 1  | 1   | 0.046443 | 4.53119698 |
| GO regulation of cell cycle arrest                                         | 1  | 1   | 0.046443 | 4.53119698 |
| GO phosphoribosylamine-glycine ligase activity                             | 1  | 1   | 0.046443 | 4.53119698 |
| GO phosphoribosylformylglycinamide cyclo-ligase activity                   | 1  | 1   | 0.046443 | 4.53119698 |
| GO phosphoribosylglycinamide formyltransferase activity                    | 1  | 1   | 0.046443 | 4.53119698 |
| GO 3-hydroxyisobutyryl-CoA hydrolase activity                              | 1  | 1   | 0.046443 | 4.53119698 |

|    |                                                                           |   |   |          |            |
|----|---------------------------------------------------------------------------|---|---|----------|------------|
| GO | glycine amidinotransferase activity                                       | 1 | 1 | 0.046443 | 4.53119698 |
| GO | glycine decarboxylation via glycine cleavage system                       | 1 | 1 | 0.046443 | 4.53119698 |
| GO | cochlea morphogenesis                                                     | 1 | 1 | 0.046443 | 4.53119698 |
| GO | floor plate formation                                                     | 1 | 1 | 0.046443 | 4.53119698 |
| GO | ventral spinal cord development                                           | 1 | 1 | 0.046443 | 4.53119698 |
| GO | glucose-1,6-bisphosphate synthase activity                                | 1 | 1 | 0.046443 | 4.53119698 |
| GO | intramolecular transferase activity, phosphotransferases                  | 1 | 1 | 0.046443 | 4.53119698 |
| GO | induction of programmed cell death in response to chemical stimulus       | 1 | 1 | 0.046443 | 4.53119698 |
| GO | chondroitin-glucuronate 5-epimerase activity                              | 1 | 1 | 0.046443 | 4.53119698 |
| GO | positive regulation of calcineurin-NFAT signaling pathway                 | 1 | 1 | 0.046443 | 4.53119698 |
| GO | regulation of cardiac muscle hypertrophy                                  | 1 | 1 | 0.046443 | 4.53119698 |
| GO | 3-hydroxy-2-methylbutyryl-CoA dehydrogenase activity                      | 1 | 1 | 0.046443 | 4.53119698 |
| GO | 7-alpha-hydroxysteroid dehydrogenase activity                             | 1 | 1 | 0.046443 | 4.53119698 |
| GO | acetoacetyl-CoA reductase activity                                        | 1 | 1 | 0.046443 | 4.53119698 |
| GO | interphase microtubule organizing center                                  | 1 | 1 | 0.046443 | 4.53119698 |
| GO | spindle checkpoint                                                        | 1 | 1 | 0.046443 | 4.53119698 |
| GO | negative regulation of phosphatidylcholine catabolic process              | 1 | 1 | 0.046443 | 4.53119698 |
| GO | plasma lipoprotein particle remodeling                                    | 1 | 1 | 0.046443 | 4.53119698 |
| GO | regulation of lipid transport                                             | 1 | 1 | 0.046443 | 4.53119698 |
| GO | maintenance of location in cell                                           | 1 | 1 | 0.046443 | 4.53119698 |
| GO | metal chelating activity                                                  | 1 | 1 | 0.046443 | 4.53119698 |
| GO | positive regulation of low-density lipoprotein receptor catabolic process | 1 | 1 | 0.046443 | 4.53119698 |
| GO | recombinase activity                                                      | 1 | 1 | 0.046443 | 4.53119698 |
| GO | interleukin-11 receptor binding                                           | 1 | 1 | 0.046443 | 4.53119698 |
| GO | activin A complex                                                         | 1 | 1 | 0.046443 | 4.53119698 |
| GO | cellular potassium ion homeostasis                                        | 1 | 1 | 0.046443 | 4.53119698 |
| GO | eye blink reflex                                                          | 1 | 1 | 0.046443 | 4.53119698 |
| GO | large conductance calcium-activated potassium channel activity            | 1 | 1 | 0.046443 | 4.53119698 |
| GO | micturition                                                               | 1 | 1 | 0.046443 | 4.53119698 |
| GO | negative regulation of cell volume                                        | 1 | 1 | 0.046443 | 4.53119698 |
| GO | regulation of aldosterone metabolic process                               | 1 | 1 | 0.046443 | 4.53119698 |
| GO | response to carbon monoxide                                               | 1 | 1 | 0.046443 | 4.53119698 |
| GO | CD8 receptor binding                                                      | 1 | 1 | 0.046443 | 4.53119698 |
| GO | regulation of lymphocyte activation                                       | 1 | 1 | 0.046443 | 4.53119698 |
| GO | regulation of intracellular protein transport                             | 1 | 1 | 0.046443 | 4.53119698 |
| GO | negative regulation of metabolic process                                  | 1 | 1 | 0.046443 | 4.53119698 |
| GO | fibrillar collagen                                                        | 1 | 1 | 0.046443 | 4.53119698 |
| GO | negative regulation of natural killer cell mediated cytotoxicity          | 1 | 1 | 0.046443 | 4.53119698 |
| GO | adrenocorticotropin receptor activity                                     | 1 | 1 | 0.046443 | 4.53119698 |
| GO | male meiosis chromosome segregation                                       | 1 | 1 | 0.046443 | 4.53119698 |
| GO | meiotic metaphase I plate congression                                     | 1 | 1 | 0.046443 | 4.53119698 |
| GO | nuclear-transcribed mRNA poly(A) tail shortening                          | 1 | 1 | 0.046443 | 4.53119698 |
| GO | resolution of meiotic recombination intermediates                         | 1 | 1 | 0.046443 | 4.53119698 |
| GO | spindle midzone assembly involved in meiosis                              | 1 | 1 | 0.046443 | 4.53119698 |
| GO | development during symbiotic interaction                                  | 1 | 1 | 0.046443 | 4.53119698 |
| GO | negative regulation of sodium ion transport                               | 1 | 1 | 0.046443 | 4.53119698 |
| GO | negative regulation of transcription from RNA polymerase II promoter      | 1 | 1 | 0.046443 | 4.53119698 |
| GO | positive regulation of nucleocytoplasmic transport                        | 1 | 1 | 0.046443 | 4.53119698 |
| GO | sodium channel inhibitor activity                                         | 1 | 1 | 0.046443 | 4.53119698 |

|    |                                                                         |   |   |          |            |
|----|-------------------------------------------------------------------------|---|---|----------|------------|
| GO | transmission of virus                                                   | 1 | 1 | 0.046443 | 4.53119698 |
| GO | forebrain astrocyte development                                         | 1 | 1 | 0.046443 | 4.53119698 |
| GO | negative regulation of transcription factor import into nucleus         | 1 | 1 | 0.046443 | 4.53119698 |
| GO | regulation of glial cell differentiation                                | 1 | 1 | 0.046443 | 4.53119698 |
| GO | negative regulation of myeloid leukocyte differentiation                | 1 | 1 | 0.046443 | 4.53119698 |
| GO | nucleoside diphosphate phosphorylation                                  | 1 | 1 | 0.046443 | 4.53119698 |
| GO | oxidized purine base lesion DNA N-glycosylase activity                  | 1 | 1 | 0.046443 | 4.53119698 |
| GO | oxytocin receptor activity                                              | 1 | 1 | 0.046443 | 4.53119698 |
| GO | negative regulation of vascular wound healing                           | 1 | 1 | 0.046443 | 4.53119698 |
| GO | negative regulation of wound healing                                    | 1 | 1 | 0.046443 | 4.53119698 |
| GO | positive regulation of leukotriene production involved in inflammator   | 1 | 1 | 0.046443 | 4.53119698 |
| GO | satellite cell commitment                                               | 1 | 1 | 0.046443 | 4.53119698 |
| GO | cyclic-nucleotide phosphodiesterase activity                            | 1 | 1 | 0.046443 | 4.53119698 |
| GO | renin secretion into blood stream                                       | 1 | 1 | 0.046443 | 4.53119698 |
| GO | negative regulation of cAMP-mediated signaling                          | 1 | 1 | 0.046443 | 4.53119698 |
| GO | phytanoyl-CoA dioxygenase activity                                      | 1 | 1 | 0.046443 | 4.53119698 |
| GO | bent DNA binding                                                        | 1 | 1 | 0.046443 | 4.53119698 |
| GO | preribosome                                                             | 1 | 1 | 0.046443 | 4.53119698 |
| GO | inhibition of phospholipase C activity involved in G-protein coupled re | 1 | 1 | 0.046443 | 4.53119698 |
| GO | negative regulation of inositol phosphate biosynthetic process          | 1 | 1 | 0.046443 | 4.53119698 |
| GO | positive regulation of inositol-polyphosphate 5-phosphatase activity    | 1 | 1 | 0.046443 | 4.53119698 |
| GO | protein secretion by platelet                                           | 1 | 1 | 0.046443 | 4.53119698 |
| GO | regulation of cell diameter                                             | 1 | 1 | 0.046443 | 4.53119698 |
| GO | epithelial tube formation                                               | 1 | 1 | 0.046443 | 4.53119698 |
| GO | positive regulation of cell-cell adhesion mediated by integrin          | 1 | 1 | 0.046443 | 4.53119698 |
| GO | regulation of microvillus assembly                                      | 1 | 1 | 0.046443 | 4.53119698 |
| GO | positive regulation of mammary gland epithelial cell proliferation      | 1 | 1 | 0.046443 | 4.53119698 |
| GO | positive regulation of mucus secretion                                  | 1 | 1 | 0.046443 | 4.53119698 |
| GO | regulation of telomerase activity                                       | 1 | 1 | 0.046443 | 4.53119698 |
| GO | N-acetylglucosamine kinase activity                                     | 1 | 1 | 0.046443 | 4.53119698 |
| GO | N-acetylmannosamine metabolic process                                   | 1 | 1 | 0.046443 | 4.53119698 |
| GO | negative regulation of activation-induced cell death of T cells         | 1 | 1 | 0.046443 | 4.53119698 |
| GO | regulation of cytokine secretion                                        | 1 | 1 | 0.046443 | 4.53119698 |
| GO | induction of retinal programmed cell death                              | 1 | 1 | 0.046443 | 4.53119698 |
| GO | mitochondrial permeability transition pore complex                      | 1 | 1 | 0.046443 | 4.53119698 |
| GO | release of matrix enzymes from mitochondria                             | 1 | 1 | 0.046443 | 4.53119698 |
| GO | ethanolamine-phosphate cytidyltransferase activity                      | 1 | 1 | 0.046443 | 4.53119698 |
| GO | smooth muscle contractile fiber                                         | 1 | 1 | 0.046443 | 4.53119698 |
| GO | vascular smooth muscle contraction                                      | 1 | 1 | 0.046443 | 4.53119698 |
| GO | cocaine metabolic process                                               | 1 | 1 | 0.046443 | 4.53119698 |
| GO | deoxynucleotide transmembrane transporter activity                      | 1 | 1 | 0.046443 | 4.53119698 |
| GO | deoxynucleotide transport                                               | 1 | 1 | 0.046443 | 4.53119698 |
| GO | ribulose-phosphate 3-epimerase activity                                 | 1 | 1 | 0.046443 | 4.53119698 |
| GO | inductive cell-cell signaling                                           | 1 | 1 | 0.046443 | 4.53119698 |
| GO | kidney epithelium development                                           | 1 | 1 | 0.046443 | 4.53119698 |
| GO | olfactory bulb mitral cell layer development                            | 1 | 1 | 0.046443 | 4.53119698 |
| GO | ureteric bud invasion                                                   | 1 | 1 | 0.046443 | 4.53119698 |
| GO | chemokine-mediated signaling pathway                                    | 1 | 1 | 0.046443 | 4.53119698 |
| GO | D-ribose metabolic process                                              | 1 | 1 | 0.046443 | 4.53119698 |

|    |                                                                         |   |   |          |            |
|----|-------------------------------------------------------------------------|---|---|----------|------------|
| GO | ribokinase activity                                                     | 1 | 1 | 0.046443 | 4.53119698 |
| GO | negative regulation of cell division                                    | 1 | 1 | 0.046443 | 4.53119698 |
| GO | Wnt receptor signaling pathway, planar cell polarity pathway            | 1 | 1 | 0.046443 | 4.53119698 |
| GO | negative regulation of systemic arterial blood pressure                 | 1 | 1 | 0.046443 | 4.53119698 |
| GO | regulation of lung blood pressure                                       | 1 | 1 | 0.046443 | 4.53119698 |
| GO | detection of mechanical stimulus involved in equilibrioception          | 1 | 1 | 0.046443 | 4.53119698 |
| GO | diencephalon morphogenesis                                              | 1 | 1 | 0.046443 | 4.53119698 |
| GO | glial cell fate commitment                                              | 1 | 1 | 0.046443 | 4.53119698 |
| GO | pigment biosynthetic process                                            | 1 | 1 | 0.046443 | 4.53119698 |
| GO | endochondral bone morphogenesis                                         | 1 | 1 | 0.046443 | 4.53119698 |
| GO | epithelial cell proliferation involved in prostatic bud elongation      | 1 | 1 | 0.046443 | 4.53119698 |
| GO | male germ-line sex determination                                        | 1 | 1 | 0.046443 | 4.53119698 |
| GO | microtubule plus end                                                    | 1 | 1 | 0.046443 | 4.53119698 |
| GO | interferon-gamma-mediated signaling pathway                             | 1 | 1 | 0.046443 | 4.53119698 |
| GO | response to type I interferon                                           | 1 | 1 | 0.046443 | 4.53119698 |
| GO | type I interferon-mediated signaling pathway                            | 1 | 1 | 0.046443 | 4.53119698 |
| GO | negative regulation of centriole replication                            | 1 | 1 | 0.046443 | 4.53119698 |
| GO | histone mRNA metabolic process                                          | 1 | 1 | 0.046443 | 4.53119698 |
| GO | actomyosin, actin part                                                  | 1 | 1 | 0.046443 | 4.53119698 |
| GO | plasma membrane part                                                    | 1 | 1 | 0.046443 | 4.53119698 |
| GO | regulation of systemic arterial blood pressure by ischemic conditions   | 1 | 1 | 0.046443 | 4.53119698 |
| GO | positive regulation of heart rate by epinephrine                        | 1 | 1 | 0.046443 | 4.53119698 |
| GO | deoxyribonucleoside monophosphate biosynthetic process                  | 1 | 1 | 0.046443 | 4.53119698 |
| GO | dTMP biosynthetic process                                               | 1 | 1 | 0.046443 | 4.53119698 |
| GO | dUMP metabolic process                                                  | 1 | 1 | 0.046443 | 4.53119698 |
| GO | thymidylate synthase activity                                           | 1 | 1 | 0.046443 | 4.53119698 |
| GO | uroporphyrinogen decarboxylase activity                                 | 1 | 1 | 0.046443 | 4.53119698 |
| GO | uroporphyrinogen III metabolic process                                  | 1 | 1 | 0.046443 | 4.53119698 |
| GO | cerebellar molecular layer development                                  | 1 | 1 | 0.046443 | 4.53119698 |
| GO | cerebellum maturation                                                   | 1 | 1 | 0.046443 | 4.53119698 |
| GO | negative regulation of hormone biosynthetic process                     | 1 | 1 | 0.046443 | 4.53119698 |
| GO | rhythmic synaptic transmission                                          | 1 | 1 | 0.046443 | 4.53119698 |
| GO | vestibular nucleus development                                          | 1 | 1 | 0.046443 | 4.53119698 |
| GO | eosinophil chemotaxis                                                   | 1 | 1 | 0.046443 | 4.53119698 |
| GO | fatty acid elongation                                                   | 1 | 1 | 0.046443 | 4.53119698 |
| GO | agmatinase activity                                                     | 1 | 1 | 0.046443 | 4.53119698 |
| GO | putrescine biosynthetic process                                         | 1 | 1 | 0.046443 | 4.53119698 |
| GO | N-terminal peptidyl-L-cysteine N-palmitoylation                         | 1 | 1 | 0.046443 | 4.53119698 |
| GO | nucleologenesis                                                         | 1 | 1 | 0.046443 | 4.53119698 |
| GO | rRNA metabolic process                                                  | 1 | 1 | 0.046443 | 4.53119698 |
| GO | RNA polymerase II transcription termination factor activity             | 1 | 1 | 0.046443 | 4.53119698 |
| GO | polarized epithelial cell differentiation                               | 1 | 1 | 0.046443 | 4.53119698 |
| GO | squamous basal epithelial stem cell differentiation involved in prostat | 1 | 1 | 0.046443 | 4.53119698 |
| GO | 1-pyrroline-5-carboxylate dehydrogenase activity                        | 1 | 1 | 0.046443 | 4.53119698 |
| GO | tRNA (uracil) methyltransferase activity                                | 1 | 1 | 0.046443 | 4.53119698 |
| GO | 25-hydroxycholesterol 7alpha-hydroxylase activity                       | 1 | 1 | 0.046443 | 4.53119698 |
| GO | metabotropic glutamate receptor binding                                 | 1 | 1 | 0.046443 | 4.53119698 |
| GO | heparan sulfate 2-O-sulfotransferase activity                           | 1 | 1 | 0.046443 | 4.53119698 |
| GO | heparin metabolic process                                               | 1 | 1 | 0.046443 | 4.53119698 |



|                                                 |    |     |          |            |
|-------------------------------------------------|----|-----|----------|------------|
| GO synaptic transmission                        | 13 | 167 | 0.047771 | 1.93677038 |
| GO structural constituent of muscle             | 5  | 43  | 0.047907 | 2.17851621 |
| GO tRNA processing                              | 6  | 57  | 0.048047 | 2.1133471  |
| GO neuron migration                             | 6  | 57  | 0.048047 | 2.1133471  |
| GO regulation of protein localization           | 3  | 18  | 0.0484   | 2.42486084 |
| GO response to corticosterone stimulus          | 3  | 18  | 0.0484   | 2.42486084 |
| GO response to inorganic substance              | 3  | 18  | 0.0484   | 2.42486084 |
| GO DNA helicase activity                        | 3  | 18  | 0.0484   | 2.42486084 |
| GO beta-amyloid binding                         | 3  | 18  | 0.0484   | 2.42486084 |
| GO beta-tubulin binding                         | 3  | 18  | 0.0484   | 2.42486084 |
| GO response to UV                               | 4  | 30  | 0.048538 | 2.26323683 |
| GO response to arsenic                          | 2  | 8   | 0.05007  | 2.73638556 |
| GO response to hyperoxia                        | 2  | 8   | 0.05007  | 2.73638556 |
| GO nucleotide biosynthetic process              | 2  | 8   | 0.05007  | 2.73638556 |
| GO determination of adult lifespan              | 2  | 8   | 0.05007  | 2.73638556 |
| GO hemopoietic progenitor cell differentiation  | 2  | 8   | 0.05007  | 2.73638556 |
| GO nuclear localization sequence binding        | 2  | 8   | 0.05007  | 2.73638556 |
| GO mismatched DNA binding                       | 2  | 8   | 0.05007  | 2.73638556 |
| GO proline-rich region binding                  | 2  | 8   | 0.05007  | 2.73638556 |
| GO pharyngeal system development                | 2  | 8   | 0.05007  | 2.73638556 |
| GO positive regulation of MAPKKK cascade        | 4  | 31  | 0.05376  | 2.18682364 |
| GO heparin binding                              | 9  | 105 | 0.055356 | 1.91746741 |
| GO DNA metabolic process                        | 3  | 19  | 0.055554 | 2.30959415 |
| GO nucleocytoplasmic transport                  | 3  | 19  | 0.055554 | 2.30959415 |
| GO high-density lipoprotein particle            | 3  | 19  | 0.055554 | 2.30959415 |
| GO very-low-density lipoprotein particle        | 3  | 19  | 0.055554 | 2.30959415 |
| GO response to amino acid stimulus              | 3  | 19  | 0.055554 | 2.30959415 |
| GO neuron projection                            | 6  | 60  | 0.059108 | 1.97439234 |
| GO nuclear pore                                 | 6  | 60  | 0.059108 | 1.97439234 |
| GO peptidyl-prolyl cis-trans isomerase activity | 4  | 32  | 0.059273 | 2.11339496 |
| GO manganese ion binding                        | 4  | 32  | 0.059273 | 2.11339496 |
| GO sensory perception of sound                  | 8  | 91  | 0.060719 | 1.88426735 |
| GO response to hypoxia                          | 11 | 140 | 0.061627 | 1.81306925 |
| GO Rac GTPase activator activity                | 2  | 9   | 0.062435 | 2.50637742 |
| GO retinal binding                              | 2  | 9   | 0.062435 | 2.50637742 |
| GO female gonad development                     | 2  | 9   | 0.062435 | 2.50637742 |
| GO skeletal muscle tissue regeneration          | 2  | 9   | 0.062435 | 2.50637742 |
| GO spectrin                                     | 2  | 9   | 0.062435 | 2.50637742 |
| GO aldehyde dehydrogenase (NAD) activity        | 2  | 9   | 0.062435 | 2.50637742 |
| GO lamellipodium membrane                       | 2  | 9   | 0.062435 | 2.50637742 |
| GO regulation of smoothened signaling pathway   | 2  | 9   | 0.062435 | 2.50637742 |
| GO M band                                       | 2  | 9   | 0.062435 | 2.50637742 |
| GO positive regulation of synaptic transmission | 2  | 9   | 0.062435 | 2.50637742 |
| GO GTP biosynthetic process                     | 2  | 9   | 0.062435 | 2.50637742 |
| GO nucleoside diphosphate kinase activity       | 2  | 9   | 0.062435 | 2.50637742 |
| GO UTP biosynthetic process                     | 2  | 9   | 0.062435 | 2.50637742 |
| GO phospholipid efflux                          | 2  | 9   | 0.062435 | 2.50637742 |
| GO muscle filament sliding                      | 2  | 9   | 0.062435 | 2.50637742 |
| GO smooth muscle tissue development             | 2  | 9   | 0.062435 | 2.50637742 |

|    |                                                                     |    |      |          |            |
|----|---------------------------------------------------------------------|----|------|----------|------------|
| GO | response to growth factor stimulus                                  | 2  | 9    | 0.062435 | 2.50637742 |
| GO | ruffle organization                                                 | 2  | 9    | 0.062435 | 2.50637742 |
| GO | DNA damage response, signal transduction by p53 class mediator res  | 2  | 9    | 0.062435 | 2.50637742 |
| GO | positive regulation of neuron apoptosis                             | 3  | 20   | 0.06318  | 2.20180026 |
| GO | adult walking behavior                                              | 3  | 20   | 0.06318  | 2.20180026 |
| GO | response to organic cyclic substance                                | 8  | 92   | 0.063933 | 1.85098428 |
| GO | elevation of cytosolic calcium ion concentration                    | 8  | 92   | 0.063933 | 1.85098428 |
| GO | negative regulation of transcription from RNA polymerase II promote | 16 | 227  | 0.064357 | 1.73157417 |
| GO | phosphoinositide-mediated signaling                                 | 4  | 33   | 0.065076 | 2.04273238 |
| GO | apical plasma membrane                                              | 12 | 159  | 0.067096 | 1.74665009 |
| GO | negative regulation of signal transduction                          | 5  | 48   | 0.070762 | 1.90273605 |
| GO | collagen binding                                                    | 4  | 34   | 0.071163 | 1.97463975 |
| GO | response to retinoic acid                                           | 4  | 34   | 0.071163 | 1.97463975 |
| GO | ATP binding                                                         | 78 | 1426 | 0.072549 | 1.54029133 |
| GO | Ras GTPase activator activity                                       | 2  | 10   | 0.075701 | 2.30801548 |
| GO | substrate adhesion-dependent cell spreading                         | 2  | 10   | 0.075701 | 2.30801548 |
| GO | NAD binding                                                         | 2  | 10   | 0.075701 | 2.30801548 |
| GO | general transcriptional repressor activity                          | 2  | 10   | 0.075701 | 2.30801548 |
| GO | limb morphogenesis                                                  | 2  | 10   | 0.075701 | 2.30801548 |
| GO | receptor internalization                                            | 2  | 10   | 0.075701 | 2.30801548 |
| GO | isotype switching                                                   | 2  | 10   | 0.075701 | 2.30801548 |
| GO | prefoldin complex                                                   | 2  | 10   | 0.075701 | 2.30801548 |
| GO | ribosomal large subunit biogenesis                                  | 2  | 10   | 0.075701 | 2.30801548 |
| GO | vascular endothelial growth factor receptor signaling pathway       | 2  | 10   | 0.075701 | 2.30801548 |
| GO | G2/M transition DNA damage checkpoint                               | 2  | 10   | 0.075701 | 2.30801548 |
| GO | acetylglucosaminyltransferase activity                              | 2  | 10   | 0.075701 | 2.30801548 |
| GO | caveola                                                             | 5  | 49   | 0.075941 | 1.85170262 |
| GO | calcium ion binding                                                 | 36 | 605  | 0.076793 | 1.55146487 |
| GO | circadian rhythm                                                    | 4  | 35   | 0.077529 | 1.90894029 |
| GO | calcium-independent cell-cell adhesion                              | 3  | 22   | 0.079776 | 2.00528928 |
| GO | eating behavior                                                     | 3  | 22   | 0.079776 | 2.00528928 |
| GO | protein heterodimerization activity                                 | 14 | 199  | 0.080639 | 1.61110896 |
| GO | activation of caspase activity                                      | 5  | 50   | 0.081319 | 1.80188952 |
| GO | anterior/posterior pattern formation                                | 7  | 81   | 0.082043 | 1.71329634 |
| GO | nervous system development                                          | 24 | 382  | 0.082978 | 1.5371756  |
| GO | transporter activity                                                | 19 | 290  | 0.083466 | 1.55539774 |
| GO | somitogenesis                                                       | 4  | 36   | 0.08417  | 1.84547417 |
| GO | DNA-directed RNA polymerase activity                                | 4  | 36   | 0.08417  | 1.84547417 |
| GO | odontogenesis of dentine-containing tooth                           | 4  | 36   | 0.08417  | 1.84547417 |
| GO | lipid transport                                                     | 6  | 66   | 0.085414 | 1.71953594 |
| GO | synapse                                                             | 17 | 255  | 0.086481 | 1.54496706 |
| GO | negative regulation of neuron apoptosis                             | 5  | 51   | 0.086894 | 1.75323972 |
| GO | ATP-dependent DNA helicase activity                                 | 3  | 23   | 0.08871  | 1.91521911 |
| GO | activation of MAPKK activity                                        | 3  | 23   | 0.08871  | 1.91521911 |
| GO | negative regulation of cell adhesion                                | 3  | 23   | 0.08871  | 1.91521911 |
| GO | developmental growth                                                | 3  | 23   | 0.08871  | 1.91521911 |
| GO | nuclear chromosome                                                  | 3  | 23   | 0.08871  | 1.91521911 |
| GO | somatic stem cell maintenance                                       | 2  | 11   | 0.089757 | 2.13410564 |
| GO | GTPase inhibitor activity                                           | 2  | 11   | 0.089757 | 2.13410564 |

|    |                                                                          |   |    |          |            |
|----|--------------------------------------------------------------------------|---|----|----------|------------|
| GO | glycosaminoglycan biosynthetic process                                   | 2 | 11 | 0.089757 | 2.13410564 |
| GO | mitotic metaphase plate congression                                      | 2 | 11 | 0.089757 | 2.13410564 |
| GO | retinol binding                                                          | 2 | 11 | 0.089757 | 2.13410564 |
| GO | platelet-derived growth factor binding                                   | 2 | 11 | 0.089757 | 2.13410564 |
| GO | fibroblast growth factor binding                                         | 2 | 11 | 0.089757 | 2.13410564 |
| GO | chylomicron                                                              | 2 | 11 | 0.089757 | 2.13410564 |
| GO | negative regulation of lipid catabolic process                           | 2 | 11 | 0.089757 | 2.13410564 |
| GO | vasodilation                                                             | 2 | 11 | 0.089757 | 2.13410564 |
| GO | 3',5'-cyclic-nucleotide phosphodiesterase activity                       | 2 | 11 | 0.089757 | 2.13410564 |
| GO | large ribosomal subunit                                                  | 2 | 11 | 0.089757 | 2.13410564 |
| GO | dipeptidase activity                                                     | 2 | 11 | 0.089757 | 2.13410564 |
| GO | phosphatidylinositol-3,4-bisphosphate binding                            | 2 | 11 | 0.089757 | 2.13410564 |
| GO | replication fork                                                         | 2 | 11 | 0.089757 | 2.13410564 |
| GO | ubiquitin activating enzyme activity                                     | 1 | 2  | 0.090731 | 3.04806739 |
| GO | C21-steroid hormone metabolic process                                    | 1 | 2  | 0.090731 | 3.04806739 |
| GO | cardiac right ventricle morphogenesis                                    | 1 | 2  | 0.090731 | 3.04806739 |
| GO | pulmonary myocardium development                                         | 1 | 2  | 0.090731 | 3.04806739 |
| GO | semaphorin receptor binding                                              | 1 | 2  | 0.090731 | 3.04806739 |
| GO | activation of phospholipase D activity                                   | 1 | 2  | 0.090731 | 3.04806739 |
| GO | tRNA (guanine-N7-)-methyltransferase activity                            | 1 | 2  | 0.090731 | 3.04806739 |
| GO | ADP-sugar diphosphatase activity                                         | 1 | 2  | 0.090731 | 3.04806739 |
| GO | Rab-protein geranylgeranyltransferase complex                            | 1 | 2  | 0.090731 | 3.04806739 |
| GO | regulation of cellular component organization                            | 1 | 2  | 0.090731 | 3.04806739 |
| GO | deacetylase activity                                                     | 1 | 2  | 0.090731 | 3.04806739 |
| GO | collagen type XI                                                         | 1 | 2  | 0.090731 | 3.04806739 |
| GO | cytoplasmic transport                                                    | 1 | 2  | 0.090731 | 3.04806739 |
| GO | radial glia guided migration of Purkinje cell                            | 1 | 2  | 0.090731 | 3.04806739 |
| GO | regulation of synapse structural plasticity                              | 1 | 2  | 0.090731 | 3.04806739 |
| GO | CTP synthase activity                                                    | 1 | 2  | 0.090731 | 3.04806739 |
| GO | demethylase activity                                                     | 1 | 2  | 0.090731 | 3.04806739 |
| GO | developmental process                                                    | 1 | 2  | 0.090731 | 3.04806739 |
| GO | vitamin D 24-hydroxylase activity                                        | 1 | 2  | 0.090731 | 3.04806739 |
| GO | benzodiazepine receptor binding                                          | 1 | 2  | 0.090731 | 3.04806739 |
| GO | cerebral cortex GABAergic interneuron fate commitment                    | 1 | 2  | 0.090731 | 3.04806739 |
| GO | regulation of transcription from RNA polymerase II promoter involved     | 1 | 2  | 0.090731 | 3.04806739 |
| GO | gamma DNA polymerase complex                                             | 1 | 2  | 0.090731 | 3.04806739 |
| GO | tRNA (cytosine-5-)-methyltransferase activity                            | 1 | 2  | 0.090731 | 3.04806739 |
| GO | DNA (cytosine-5-)-methyltransferase activity, acting on CpG substrate    | 1 | 2  | 0.090731 | 3.04806739 |
| GO | DNA methylation on cytosine within a CG sequence                         | 1 | 2  | 0.090731 | 3.04806739 |
| GO | annulate lamellae                                                        | 1 | 2  | 0.090731 | 3.04806739 |
| GO | PH domain binding                                                        | 1 | 2  | 0.090731 | 3.04806739 |
| GO | glucuronyl-galactosyl-proteoglycan 4-alpha-N-acetylglucosaminyltran      | 1 | 2  | 0.090731 | 3.04806739 |
| GO | establishment of synaptic specificity at neuromuscular junction          | 1 | 2  | 0.090731 | 3.04806739 |
| GO | platelet dense tubular network                                           | 1 | 2  | 0.090731 | 3.04806739 |
| GO | olfactory pit development                                                | 1 | 2  | 0.090731 | 3.04806739 |
| GO | retinoic acid biosynthetic process                                       | 1 | 2  | 0.090731 | 3.04806739 |
| GO | de novo' protein folding                                                 | 1 | 2  | 0.090731 | 3.04806739 |
| GO | negative regulation of protein phosphatase type 2B activity              | 1 | 2  | 0.090731 | 3.04806739 |
| GO | regulation of cardiac muscle contraction by regulation of the release of | 1 | 2  | 0.090731 | 3.04806739 |

|    |                                                                            |   |   |          |            |
|----|----------------------------------------------------------------------------|---|---|----------|------------|
| GO | release of sequestered calcium ion into cytosol by sarcoplasmic reticu     | 1 | 2 | 0.090731 | 3.04806739 |
| GO | pentose-phosphate shunt, non-oxidative branch                              | 1 | 2 | 0.090731 | 3.04806739 |
| GO | glycerol-3-phosphate catabolic process                                     | 1 | 2 | 0.090731 | 3.04806739 |
| GO | negative regulation of actin filament polymerization                       | 1 | 2 | 0.090731 | 3.04806739 |
| GO | positive regulation of plasma membrane long-chain fatty acid transpc       | 1 | 2 | 0.090731 | 3.04806739 |
| GO | trans-hexaprenyltranstransferase activity                                  | 1 | 2 | 0.090731 | 3.04806739 |
| GO | trans-octaprenyltranstransferase activity                                  | 1 | 2 | 0.090731 | 3.04806739 |
| GO | detection of stimulus                                                      | 1 | 2 | 0.090731 | 3.04806739 |
| GO | T cell mediated cytotoxicity                                               | 1 | 2 | 0.090731 | 3.04806739 |
| GO | arachidonate 5-lipoxygenase activity                                       | 1 | 2 | 0.090731 | 3.04806739 |
| GO | hydroxyacylglutathione hydrolase activity                                  | 1 | 2 | 0.090731 | 3.04806739 |
| GO | carbon-carbon lyase activity                                               | 1 | 2 | 0.090731 | 3.04806739 |
| GO | creatine biosynthetic process                                              | 1 | 2 | 0.090731 | 3.04806739 |
| GO | glycine cleavage complex                                                   | 1 | 2 | 0.090731 | 3.04806739 |
| GO | notochord regression                                                       | 1 | 2 | 0.090731 | 3.04806739 |
| GO | smoothened signaling pathway involved in spinal cord motor neuron          | 1 | 2 | 0.090731 | 3.04806739 |
| GO | smoothened signaling pathway involved in ventral spinal cord interne       | 1 | 2 | 0.090731 | 3.04806739 |
| GO | specification of segmental identity, maxillary segment                     | 1 | 2 | 0.090731 | 3.04806739 |
| GO | spinal cord ventral commissure morphogenesis                               | 1 | 2 | 0.090731 | 3.04806739 |
| GO | response to lipid hydroperoxide                                            | 1 | 2 | 0.090731 | 3.04806739 |
| GO | kainate selective glutamate receptor complex                               | 1 | 2 | 0.090731 | 3.04806739 |
| GO | voltage-gated cation channel activity                                      | 1 | 2 | 0.090731 | 3.04806739 |
| GO | cytoplasm organization                                                     | 1 | 2 | 0.090731 | 3.04806739 |
| GO | positive regulation of growth                                              | 1 | 2 | 0.090731 | 3.04806739 |
| GO | dermatan sulfate biosynthetic process                                      | 1 | 2 | 0.090731 | 3.04806739 |
| GO | hydroxymethylglutaryl-CoA synthase activity                                | 1 | 2 | 0.090731 | 3.04806739 |
| GO | positive regulation of cell development                                    | 1 | 2 | 0.090731 | 3.04806739 |
| GO | 15-hydroxyprostaglandin dehydrogenase (NAD+) activity                      | 1 | 2 | 0.090731 | 3.04806739 |
| GO | N-methyltransferase activity                                               | 1 | 2 | 0.090731 | 3.04806739 |
| GO | establishment of chromosome localization                                   | 1 | 2 | 0.090731 | 3.04806739 |
| GO | follistatin binding                                                        | 1 | 2 | 0.090731 | 3.04806739 |
| GO | inhibin A complex                                                          | 1 | 2 | 0.090731 | 3.04806739 |
| GO | negative regulation of lipoprotein metabolic process                       | 1 | 2 | 0.090731 | 3.04806739 |
| GO | neuronal cell body membrane                                                | 1 | 2 | 0.090731 | 3.04806739 |
| GO | smooth muscle contraction involved in micturition                          | 1 | 2 | 0.090731 | 3.04806739 |
| GO | M phase specific microtubule process                                       | 1 | 2 | 0.090731 | 3.04806739 |
| GO | CD4 receptor binding                                                       | 1 | 2 | 0.090731 | 3.04806739 |
| GO | leptin-mediated signaling pathway                                          | 1 | 2 | 0.090731 | 3.04806739 |
| GO | cerebellar Purkinje cell-granule cell precursor cell signaling involved ir | 1 | 2 | 0.090731 | 3.04806739 |
| GO | ectoderm formation                                                         | 1 | 2 | 0.090731 | 3.04806739 |
| GO | forebrain regionalization                                                  | 1 | 2 | 0.090731 | 3.04806739 |
| GO | head development                                                           | 1 | 2 | 0.090731 | 3.04806739 |
| GO | angiotensin receptor binding                                               | 1 | 2 | 0.090731 | 3.04806739 |
| GO | N-acetylgalactosamine-4-sulfatase activity                                 | 1 | 2 | 0.090731 | 3.04806739 |
| GO | chiasma                                                                    | 1 | 2 | 0.090731 | 3.04806739 |
| GO | MutLalpha complex                                                          | 1 | 2 | 0.090731 | 3.04806739 |
| GO | B cell mediated immunity                                                   | 1 | 2 | 0.090731 | 3.04806739 |
| GO | dinucleotide repeat insertion binding                                      | 1 | 2 | 0.090731 | 3.04806739 |
| GO | MutSalpha complex                                                          | 1 | 2 | 0.090731 | 3.04806739 |

|                                                                                                              |   |   |          |            |
|--------------------------------------------------------------------------------------------------------------|---|---|----------|------------|
| GO MutSbeta complex                                                                                          | 1 | 2 | 0.090731 | 3.04806739 |
| GO single thymine insertion binding                                                                          | 1 | 2 | 0.090731 | 3.04806739 |
| GO beta-2 adrenergic receptor binding                                                                        | 1 | 2 | 0.090731 | 3.04806739 |
| GO phosphothreonine binding                                                                                  | 1 | 2 | 0.090731 | 3.04806739 |
| GO regulation of Ras GTPase activity                                                                         | 1 | 2 | 0.090731 | 3.04806739 |
| GO Schwann cell development                                                                                  | 1 | 2 | 0.090731 | 3.04806739 |
| GO hydrogen:potassium-exchanging ATPase complex                                                              | 1 | 2 | 0.090731 | 3.04806739 |
| GO protein import into nucleus, docking                                                                      | 1 | 2 | 0.090731 | 3.04806739 |
| GO regulation of fibroblast growth factor receptor signaling pathway                                         | 1 | 2 | 0.090731 | 3.04806739 |
| GO regulation of digestive system process                                                                    | 1 | 2 | 0.090731 | 3.04806739 |
| GO response to anoxia                                                                                        | 1 | 2 | 0.090731 | 3.04806739 |
| GO negative regulation of norepinephrine secretion                                                           | 1 | 2 | 0.090731 | 3.04806739 |
| GO UDP-activated nucleotide receptor activity                                                                | 1 | 2 | 0.090731 | 3.04806739 |
| GO chronological cell aging                                                                                  | 1 | 2 | 0.090731 | 3.04806739 |
| GO viral assembly, maturation, egress, and release                                                           | 1 | 2 | 0.090731 | 3.04806739 |
| GO cGMP-inhibited cyclic-nucleotide phosphodiesterase activity                                               | 1 | 2 | 0.090731 | 3.04806739 |
| GO regulation of morphogenesis of a branching structure                                                      | 1 | 2 | 0.090731 | 3.04806739 |
| GO negative regulation of calcium-mediated signaling                                                         | 1 | 2 | 0.090731 | 3.04806739 |
| GO platelet degranulation                                                                                    | 1 | 2 | 0.090731 | 3.04806739 |
| GO positive regulation of actin filament depolymerization                                                    | 1 | 2 | 0.090731 | 3.04806739 |
| GO positive regulation of integrin activation                                                                | 1 | 2 | 0.090731 | 3.04806739 |
| GO thrombin receptor signaling pathway                                                                       | 1 | 2 | 0.090731 | 3.04806739 |
| GO calcium-dependent cell-matrix adhesion                                                                    | 1 | 2 | 0.090731 | 3.04806739 |
| GO telomeric RNA binding                                                                                     | 1 | 2 | 0.090731 | 3.04806739 |
| GO drug transmembrane transport                                                                              | 1 | 2 | 0.090731 | 3.04806739 |
| GO oleoyl-[acyl-carrier-protein] hydrolase activity                                                          | 1 | 2 | 0.090731 | 3.04806739 |
| GO dosage compensation                                                                                       | 1 | 2 | 0.090731 | 3.04806739 |
| GO N-acylmannosamine kinase activity                                                                         | 1 | 2 | 0.090731 | 3.04806739 |
| GO maturation of 5.8S rRNA from tricistronic rRNA transcript (SSU-rRNA, preribosome, large subunit precursor | 1 | 2 | 0.090731 | 3.04806739 |
| GO mRNA (2'-O-methyladenosine-N6-)-methyltransferase activity                                                | 1 | 2 | 0.090731 | 3.04806739 |
| GO interleukin-2 secretion                                                                                   | 1 | 2 | 0.090731 | 3.04806739 |
| GO BH3 domain binding                                                                                        | 1 | 2 | 0.090731 | 3.04806739 |
| GO establishment or maintenance of transmembrane electrochemical gradient                                    | 1 | 2 | 0.090731 | 3.04806739 |
| GO mitochondrial fragmentation involved in apoptosis                                                         | 1 | 2 | 0.090731 | 3.04806739 |
| GO nuclear fragmentation involved in apoptotic nuclear change                                                | 1 | 2 | 0.090731 | 3.04806739 |
| GO branched chain family amino acid biosynthetic process                                                     | 1 | 2 | 0.090731 | 3.04806739 |
| GO branched-chain-amino-acid transaminase activity                                                           | 1 | 2 | 0.090731 | 3.04806739 |
| GO crossover junction endodeoxyribonuclease activity                                                         | 1 | 2 | 0.090731 | 3.04806739 |
| GO female meiosis sister chromatid cohesion                                                                  | 1 | 2 | 0.090731 | 3.04806739 |
| GO acetylcholinesterase activity                                                                             | 1 | 2 | 0.090731 | 3.04806739 |
| GO response to alkaloid                                                                                      | 1 | 2 | 0.090731 | 3.04806739 |
| GO DNA strand renaturation                                                                                   | 1 | 2 | 0.090731 | 3.04806739 |
| GO class I ribonucleotide reductase activity                                                                 | 1 | 2 | 0.090731 | 3.04806739 |
| GO deoxyribonucleoside diphosphate metabolic process                                                         | 1 | 2 | 0.090731 | 3.04806739 |
| GO olfactory bulb interneuron differentiation                                                                | 1 | 2 | 0.090731 | 3.04806739 |
| GO olfactory nerve development                                                                               | 1 | 2 | 0.090731 | 3.04806739 |
| GO regulation of vascular endothelial growth factor production                                               | 1 | 2 | 0.090731 | 3.04806739 |
| GO response to vitamin B3                                                                                    | 1 | 2 | 0.090731 | 3.04806739 |

|    |                                                         |   |     |          |            |
|----|---------------------------------------------------------|---|-----|----------|------------|
| GO | alpha-beta T cell differentiation                       | 1 | 2   | 0.090731 | 3.04806739 |
| GO | four-way junction helicase activity                     | 1 | 2   | 0.090731 | 3.04806739 |
| GO | replication fork processing                             | 1 | 2   | 0.090731 | 3.04806739 |
| GO | negative regulation of axon regeneration                | 1 | 2   | 0.090731 | 3.04806739 |
| GO | protein xylosyltransferase activity                     | 1 | 2   | 0.090731 | 3.04806739 |
| GO | fructose transmembrane transporter activity             | 1 | 2   | 0.090731 | 3.04806739 |
| GO | fructose transport                                      | 1 | 2   | 0.090731 | 3.04806739 |
| GO | cytosolic calcium ion transport                         | 1 | 2   | 0.090731 | 3.04806739 |
| GO | negative regulation of vasoconstriction                 | 1 | 2   | 0.090731 | 3.04806739 |
| GO | negative regulation of viral transcription              | 1 | 2   | 0.090731 | 3.04806739 |
| GO | nuclear periphery                                       | 1 | 2   | 0.090731 | 3.04806739 |
| GO | cytokinesis, completion of separation                   | 1 | 2   | 0.090731 | 3.04806739 |
| GO | protein hexamerization                                  | 1 | 2   | 0.090731 | 3.04806739 |
| GO | 2,3-bisphospho-D-glycerate 2-phosphohydrolase activity  | 1 | 2   | 0.090731 | 3.04806739 |
| GO | bisphosphoglycerate mutase activity                     | 1 | 2   | 0.090731 | 3.04806739 |
| GO | phosphoglycerate mutase activity                        | 1 | 2   | 0.090731 | 3.04806739 |
| GO | cuticular plate                                         | 1 | 2   | 0.090731 | 3.04806739 |
| GO | BRCA1-BARD1 complex                                     | 1 | 2   | 0.090731 | 3.04806739 |
| GO | alcohol sulfotransferase activity                       | 1 | 2   | 0.090731 | 3.04806739 |
| GO | steroid sulfotransferase activity                       | 1 | 2   | 0.090731 | 3.04806739 |
| GO | sulfonylurea receptor activity                          | 1 | 2   | 0.090731 | 3.04806739 |
| GO | transferrin receptor activity                           | 1 | 2   | 0.090731 | 3.04806739 |
| GO | negative regulation of endothelial cell differentiation | 1 | 2   | 0.090731 | 3.04806739 |
| GO | ISG15 ligase activity                                   | 1 | 2   | 0.090731 | 3.04806739 |
| GO | musculoskeletal movement, spinal reflex action          | 1 | 2   | 0.090731 | 3.04806739 |
| GO | sulfur amino acid metabolic process                     | 1 | 2   | 0.090731 | 3.04806739 |
| GO | regulation of fat cell differentiation                  | 1 | 2   | 0.090731 | 3.04806739 |
| GO | labyrinthine layer morphogenesis                        | 1 | 2   | 0.090731 | 3.04806739 |
| GO | carbohydrate mediated signaling                         | 1 | 2   | 0.090731 | 3.04806739 |
| GO | beta-galactoside alpha-2,6-sialyltransferase activity   | 1 | 2   | 0.090731 | 3.04806739 |
| GO | chromatin silencing at telomere                         | 1 | 2   | 0.090731 | 3.04806739 |
| GO | internal protein amino acid acetylation                 | 1 | 2   | 0.090731 | 3.04806739 |
| GO | cloacal septation                                       | 1 | 2   | 0.090731 | 3.04806739 |
| GO | female genitalia morphogenesis                          | 1 | 2   | 0.090731 | 3.04806739 |
| GO | rough microsome                                         | 1 | 2   | 0.090731 | 3.04806739 |
| GO | proline metabolic process                               | 1 | 2   | 0.090731 | 3.04806739 |
| GO | JAK pathway signal transduction adaptor activity        | 1 | 2   | 0.090731 | 3.04806739 |
| GO | prolactin receptor binding                              | 1 | 2   | 0.090731 | 3.04806739 |
| GO | male pronucleus                                         | 1 | 2   | 0.090731 | 3.04806739 |
| GO | antral ovarian follicle growth                          | 1 | 2   | 0.090731 | 3.04806739 |
| GO | response to purine                                      | 1 | 2   | 0.090731 | 3.04806739 |
| GO | cell-substrate adherens junction                        | 1 | 2   | 0.090731 | 3.04806739 |
| GO | D-amino acid catabolic process                          | 1 | 2   | 0.090731 | 3.04806739 |
| GO | oxysterol 7-alpha-hydroxylase activity                  | 1 | 2   | 0.090731 | 3.04806739 |
| GO | GKAP/Homer scaffold activity                            | 1 | 2   | 0.090731 | 3.04806739 |
| GO | acylphosphatase activity                                | 1 | 2   | 0.090731 | 3.04806739 |
| GO | stereocilium bundle                                     | 1 | 2   | 0.090731 | 3.04806739 |
| GO | phosphatase regulator activity                          | 1 | 2   | 0.090731 | 3.04806739 |
| GO | central nervous system development                      | 8 | 100 | 0.093389 | 1.59876183 |

|    |                                                              |    |      |          |            |
|----|--------------------------------------------------------------|----|------|----------|------------|
| GO | protein domain specific binding                              | 9  | 117  | 0.094419 | 1.57146627 |
| GO | ubiquitin thiolesterase activity                             | 6  | 68   | 0.095409 | 1.64052904 |
| GO | calcium-dependent cell-cell adhesion                         | 3  | 24   | 0.098042 | 1.8298677  |
| GO | platelet activation                                          | 3  | 24   | 0.098042 | 1.8298677  |
| GO | regulation of membrane potential                             | 3  | 24   | 0.098042 | 1.8298677  |
| GO | neuromuscular junction                                       | 3  | 24   | 0.098042 | 1.8298677  |
| GO | response to progesterone stimulus                            | 3  | 24   | 0.098042 | 1.8298677  |
| GO | negative regulation of cell migration                        | 4  | 38   | 0.09825  | 1.72467556 |
| GO | spliceosomal complex                                         | 9  | 118  | 0.098254 | 1.54445556 |
| GO | nucleotide binding                                           | 98 | 1859 | 0.099123 | 1.35323039 |
| GO | lipid metabolic process                                      | 14 | 206  | 0.099716 | 1.47557397 |
| GO | voltage-gated potassium channel complex                      | 7  | 85   | 0.099837 | 1.57671243 |
| GO | ligand-dependent nuclear receptor binding                    | 2  | 12   | 0.104501 | 1.9795776  |
| GO | tissue development                                           | 2  | 12   | 0.104501 | 1.9795776  |
| GO | dendrite morphogenesis                                       | 2  | 12   | 0.104501 | 1.9795776  |
| GO | release of sequestered calcium ion into cytosol              | 2  | 12   | 0.104501 | 1.9795776  |
| GO | smooth muscle contraction                                    | 2  | 12   | 0.104501 | 1.9795776  |
| GO | septin complex                                               | 2  | 12   | 0.104501 | 1.9795776  |
| GO | mitochondrial inner membrane presequence translocase complex | 2  | 12   | 0.104501 | 1.9795776  |
| GO | regulation of muscle contraction                             | 2  | 12   | 0.104501 | 1.9795776  |
| GO | caspase inhibitor activity                                   | 2  | 12   | 0.104501 | 1.9795776  |
| GO | low-density lipoprotein particle                             | 2  | 12   | 0.104501 | 1.9795776  |
| GO | response to electrical stimulus                              | 2  | 12   | 0.104501 | 1.9795776  |
| GO | alpha-tubulin binding                                        | 2  | 12   | 0.104501 | 1.9795776  |
| GO | response to chemical stimulus                                | 2  | 12   | 0.104501 | 1.9795776  |
| GO | ubiquitin ligase complex                                     | 5  | 54   | 0.104773 | 1.61375448 |
| GO | androgen receptor signaling pathway                          | 4  | 39   | 0.105675 | 1.66709121 |
| GO | response to antibiotic                                       | 3  | 25   | 0.10775  | 1.74877776 |
| GO | nucleotide metabolic process                                 | 3  | 25   | 0.10775  | 1.74877776 |
| GO | midbody                                                      | 3  | 25   | 0.10775  | 1.74877776 |
| GO | protein polymerization                                       | 3  | 25   | 0.10775  | 1.74877776 |
| GO | nucleotidyltransferase activity                              | 6  | 71   | 0.111514 | 1.52690392 |
| GO | ubiquitin-dependent protein catabolic process                | 10 | 139  | 0.112911 | 1.4337959  |
| GO | enzyme activator activity                                    | 4  | 40   | 0.113346 | 1.61123371 |
| GO | embryonic development                                        | 6  | 72   | 0.117172 | 1.49024583 |
| GO | response to nutrient                                         | 6  | 72   | 0.117172 | 1.49024583 |
| GO | embryo implantation                                          | 3  | 26   | 0.117814 | 1.67155306 |
| GO | cellular response to hormone stimulus                        | 3  | 26   | 0.117814 | 1.67155306 |
| GO | negative regulation of phosphorylation                       | 2  | 13   | 0.119841 | 1.84073838 |
| GO | acetylcholine receptor activity                              | 2  | 13   | 0.119841 | 1.84073838 |
| GO | protein autoubiquitination                                   | 2  | 13   | 0.119841 | 1.84073838 |
| GO | oogenesis                                                    | 2  | 13   | 0.119841 | 1.84073838 |
| GO | embryonic cranial skeleton morphogenesis                     | 2  | 13   | 0.119841 | 1.84073838 |
| GO | synaptic transmission, glutamatergic                         | 2  | 13   | 0.119841 | 1.84073838 |
| GO | high-density lipoprotein particle remodeling                 | 2  | 13   | 0.119841 | 1.84073838 |
| GO | hormone metabolic process                                    | 2  | 13   | 0.119841 | 1.84073838 |
| GO | myosin binding                                               | 2  | 13   | 0.119841 | 1.84073838 |
| GO | positive regulation of stress fiber assembly                 | 2  | 13   | 0.119841 | 1.84073838 |
| GO | centrosome organization                                      | 2  | 13   | 0.119841 | 1.84073838 |

|    |                                                               |    |     |          |            |
|----|---------------------------------------------------------------|----|-----|----------|------------|
| GO | coated pit                                                    | 4  | 41  | 0.121254 | 1.55700252 |
| GO | myosin complex                                                | 4  | 41  | 0.121254 | 1.55700252 |
| GO | magnesium ion binding                                         | 11 | 159 | 0.121958 | 1.36822318 |
| GO | nucleolus                                                     | 39 | 692 | 0.122428 | 1.26262769 |
| GO | integrin-mediated signaling pathway                           | 5  | 57  | 0.12431  | 1.48301391 |
| GO | protein complex binding                                       | 7  | 90  | 0.12479  | 1.41590316 |
| GO | neuron development                                            | 3  | 27  | 0.12821  | 1.59784823 |
| GO | kinase binding                                                | 3  | 27  | 0.12821  | 1.59784823 |
| GO | ATP synthesis coupled proton transport                        | 3  | 27  | 0.12821  | 1.59784823 |
| GO | JAK-STAT cascade                                              | 3  | 27  | 0.12821  | 1.59784823 |
| GO | vasculogenesis                                                | 4  | 42  | 0.129391 | 1.50430533 |
| GO | negative regulation of cell growth                            | 7  | 91  | 0.13013  | 1.38494938 |
| GO | synaptosome                                                   | 7  | 91  | 0.13013  | 1.38494938 |
| GO | microtubule binding                                           | 5  | 58  | 0.131171 | 1.44119065 |
| GO | cholesterol metabolic process                                 | 5  | 58  | 0.131171 | 1.44119065 |
| GO | positive regulation of lamellipodium assembly                 | 1  | 3   | 0.132965 | 2.3613787  |
| GO | carbonyl reductase (NADPH) activity                           | 1  | 3   | 0.132965 | 2.3613787  |
| GO | negative regulation of stress fiber assembly                  | 1  | 3   | 0.132965 | 2.3613787  |
| GO | U4/U6 snRNP                                                   | 1  | 3   | 0.132965 | 2.3613787  |
| GO | limb bud formation                                            | 1  | 3   | 0.132965 | 2.3613787  |
| GO | regulation of Rac GTPase activity                             | 1  | 3   | 0.132965 | 2.3613787  |
| GO | ADP-ribose diphosphatase activity                             | 1  | 3   | 0.132965 | 2.3613787  |
| GO | cohesin complex                                               | 1  | 3   | 0.132965 | 2.3613787  |
| GO | interphase of mitotic cell cycle                              | 1  | 3   | 0.132965 | 2.3613787  |
| GO | synaptic transmission involved in micturition                 | 1  | 3   | 0.132965 | 2.3613787  |
| GO | nucleotide-excision repair complex                            | 1  | 3   | 0.132965 | 2.3613787  |
| GO | proteoglycan binding                                          | 1  | 3   | 0.132965 | 2.3613787  |
| GO | lipase activity                                               | 1  | 3   | 0.132965 | 2.3613787  |
| GO | serine hydrolase activity                                     | 1  | 3   | 0.132965 | 2.3613787  |
| GO | negative regulation of nuclear mRNA splicing, via spliceosome | 1  | 3   | 0.132965 | 2.3613787  |
| GO | NEDD8 ligase activity                                         | 1  | 3   | 0.132965 | 2.3613787  |
| GO | positive regulation of vascular permeability                  | 1  | 3   | 0.132965 | 2.3613787  |
| GO | porphyrin metabolic process                                   | 1  | 3   | 0.132965 | 2.3613787  |
| GO | positive regulation of S phase of mitotic cell cycle          | 1  | 3   | 0.132965 | 2.3613787  |
| GO | response to nematode                                          | 1  | 3   | 0.132965 | 2.3613787  |
| GO | AMP biosynthetic process                                      | 1  | 3   | 0.132965 | 2.3613787  |
| GO | thyroxine 5'-deiodinase activity                              | 1  | 3   | 0.132965 | 2.3613787  |
| GO | DNA methylation involved in embryonic development             | 1  | 3   | 0.132965 | 2.3613787  |
| GO | S-adenosylmethioninamine metabolic process                    | 1  | 3   | 0.132965 | 2.3613787  |
| GO | positive regulation of translational elongation               | 1  | 3   | 0.132965 | 2.3613787  |
| GO | positive regulation of translational termination              | 1  | 3   | 0.132965 | 2.3613787  |
| GO | translational frameshifting                                   | 1  | 3   | 0.132965 | 2.3613787  |
| GO | UDP-N-acetylgalactosamine metabolic process                   | 1  | 3   | 0.132965 | 2.3613787  |
| GO | histone dephosphorylation                                     | 1  | 3   | 0.132965 | 2.3613787  |
| GO | connective tissue replacement during inflammatory response    | 1  | 3   | 0.132965 | 2.3613787  |
| GO | regulation of interleukin-1 beta production                   | 1  | 3   | 0.132965 | 2.3613787  |
| GO | STAT protein nuclear translocation                            | 1  | 3   | 0.132965 | 2.3613787  |
| GO | tyrosine phosphorylation of STAT protein                      | 1  | 3   | 0.132965 | 2.3613787  |
| GO | thyroid hormone binding                                       | 1  | 3   | 0.132965 | 2.3613787  |



|    |                                                                        |   |   |          |           |
|----|------------------------------------------------------------------------|---|---|----------|-----------|
| GO | substrate-bound cell migration                                         | 1 | 3 | 0.132965 | 2.3613787 |
| GO | negative regulation of heart rate                                      | 1 | 3 | 0.132965 | 2.3613787 |
| GO | negative regulation of stress-activated MAPK cascade                   | 1 | 3 | 0.132965 | 2.3613787 |
| GO | regulation of oxygen and reactive oxygen species metabolic process     | 1 | 3 | 0.132965 | 2.3613787 |
| GO | nicotinamide-nucleotide adenylyltransferase activity                   | 1 | 3 | 0.132965 | 2.3613787 |
| GO | nicotinate-nucleotide adenylyltransferase activity                     | 1 | 3 | 0.132965 | 2.3613787 |
| GO | glycerol-3-phosphate dehydrogenase (NAD+) activity                     | 1 | 3 | 0.132965 | 2.3613787 |
| GO | glycerol-3-phosphate dehydrogenase complex                             | 1 | 3 | 0.132965 | 2.3613787 |
| GO | intracellular receptor mediated signaling pathway                      | 1 | 3 | 0.132965 | 2.3613787 |
| GO | susceptibility to natural killer cell mediated cytotoxicity            | 1 | 3 | 0.132965 | 2.3613787 |
| GO | cellular response to calcium ion                                       | 1 | 3 | 0.132965 | 2.3613787 |
| GO | Rap GTPase activator activity                                          | 1 | 3 | 0.132965 | 2.3613787 |
| GO | de novo' IMP biosynthetic process                                      | 1 | 3 | 0.132965 | 2.3613787 |
| GO | organ development                                                      | 1 | 3 | 0.132965 | 2.3613787 |
| GO | cerebellar cortex morphogenesis                                        | 1 | 3 | 0.132965 | 2.3613787 |
| GO | epidermal cell differentiation                                         | 1 | 3 | 0.132965 | 2.3613787 |
| GO | smoothened signaling pathway involved in dorsal/ventral neural tube    | 1 | 3 | 0.132965 | 2.3613787 |
| GO | tube development                                                       | 1 | 3 | 0.132965 | 2.3613787 |
| GO | ventral midline development                                            | 1 | 3 | 0.132965 | 2.3613787 |
| GO | response to molecule of fungal origin                                  | 1 | 3 | 0.132965 | 2.3613787 |
| GO | salivary gland development                                             | 1 | 3 | 0.132965 | 2.3613787 |
| GO | hyaluronan synthase activity                                           | 1 | 3 | 0.132965 | 2.3613787 |
| GO | peripheral nervous system neuron development                           | 1 | 3 | 0.132965 | 2.3613787 |
| GO | spinal cord motor neuron cell fate specification                       | 1 | 3 | 0.132965 | 2.3613787 |
| GO | chromosome passenger complex                                           | 1 | 3 | 0.132965 | 2.3613787 |
| GO | cobalt ion binding                                                     | 1 | 3 | 0.132965 | 2.3613787 |
| GO | lipase inhibitor activity                                              | 1 | 3 | 0.132965 | 2.3613787 |
| GO | negative regulation of cholesterol transport                           | 1 | 3 | 0.132965 | 2.3613787 |
| GO | negative regulation of lipid metabolic process                         | 1 | 3 | 0.132965 | 2.3613787 |
| GO | negative regulation of very-low-density lipoprotein particle clearance | 1 | 3 | 0.132965 | 2.3613787 |
| GO | intermediate-density lipoprotein particle                              | 1 | 3 | 0.132965 | 2.3613787 |
| GO | negative regulation of cholesterol biosynthetic process                | 1 | 3 | 0.132965 | 2.3613787 |
| GO | very-low-density lipoprotein receptor binding                          | 1 | 3 | 0.132965 | 2.3613787 |
| GO | negative regulation of smooth muscle cell apoptosis                    | 1 | 3 | 0.132965 | 2.3613787 |
| GO | positive regulation of necrotic cell death                             | 1 | 3 | 0.132965 | 2.3613787 |
| GO | negative regulation of B cell differentiation                          | 1 | 3 | 0.132965 | 2.3613787 |
| GO | negative regulation of interferon-gamma biosynthetic process           | 1 | 3 | 0.132965 | 2.3613787 |
| GO | positive regulation of follicle-stimulating hormone secretion          | 1 | 3 | 0.132965 | 2.3613787 |
| GO | negative regulation of low-density lipoprotein receptor biosynthetic p | 1 | 3 | 0.132965 | 2.3613787 |
| GO | A-type (transient outward) potassium channel activity                  | 1 | 3 | 0.132965 | 2.3613787 |
| GO | locomotor rhythm                                                       | 1 | 3 | 0.132965 | 2.3613787 |
| GO | relaxation of vascular smooth muscle                                   | 1 | 3 | 0.132965 | 2.3613787 |
| GO | miRNA catabolic process                                                | 1 | 3 | 0.132965 | 2.3613787 |
| GO | positive regulation of T cell receptor signaling pathway               | 1 | 3 | 0.132965 | 2.3613787 |
| GO | phagocytic cup                                                         | 1 | 3 | 0.132965 | 2.3613787 |
| GO | T cell activation during immune response                               | 1 | 3 | 0.132965 | 2.3613787 |
| GO | regulation of gluconeogenesis                                          | 1 | 3 | 0.132965 | 2.3613787 |
| GO | aryl hydrocarbon receptor binding                                      | 1 | 3 | 0.132965 | 2.3613787 |
| GO | desensitization of G-protein coupled receptor protein signaling pathw  | 1 | 3 | 0.132965 | 2.3613787 |

|    |                                                                        |   |   |          |           |
|----|------------------------------------------------------------------------|---|---|----------|-----------|
| GO | myeloid progenitor cell differentiation                                | 1 | 3 | 0.132965 | 2.3613787 |
| GO | dinucleotide insertion or deletion binding                             | 1 | 3 | 0.132965 | 2.3613787 |
| GO | four-way junction DNA binding                                          | 1 | 3 | 0.132965 | 2.3613787 |
| GO | maintenance of DNA repeat elements                                     | 1 | 3 | 0.132965 | 2.3613787 |
| GO | oxidized purine DNA binding                                            | 1 | 3 | 0.132965 | 2.3613787 |
| GO | single guanine insertion binding                                       | 1 | 3 | 0.132965 | 2.3613787 |
| GO | negative regulation of vascular endothelial growth factor receptor sig | 1 | 3 | 0.132965 | 2.3613787 |
| GO | phosphoserine binding                                                  | 1 | 3 | 0.132965 | 2.3613787 |
| GO | positive regulation of Ras GTPase activity                             | 1 | 3 | 0.132965 | 2.3613787 |
| GO | regulation of blood vessel endothelial cell migration                  | 1 | 3 | 0.132965 | 2.3613787 |
| GO | regulation of bone resorption                                          | 1 | 3 | 0.132965 | 2.3613787 |
| GO | hydrogen:potassium-exchanging ATPase activity                          | 1 | 3 | 0.132965 | 2.3613787 |
| GO | visual behavior                                                        | 1 | 3 | 0.132965 | 2.3613787 |
| GO | clustering of voltage-gated sodium channels                            | 1 | 3 | 0.132965 | 2.3613787 |
| GO | nuclear pore organization                                              | 1 | 3 | 0.132965 | 2.3613787 |
| GO | depurination                                                           | 1 | 3 | 0.132965 | 2.3613787 |
| GO | origin recognition complex                                             | 1 | 3 | 0.132965 | 2.3613787 |
| GO | estrous cycle phase                                                    | 1 | 3 | 0.132965 | 2.3613787 |
| GO | positive regulation of norepinephrine secretion                        | 1 | 3 | 0.132965 | 2.3613787 |
| GO | negative regulation of endopeptidase activity                          | 1 | 3 | 0.132965 | 2.3613787 |
| GO | negative regulation of plasminogen activation                          | 1 | 3 | 0.132965 | 2.3613787 |
| GO | positive regulation of monocyte chemotaxis                             | 1 | 3 | 0.132965 | 2.3613787 |
| GO | cGMP catabolic process                                                 | 1 | 3 | 0.132965 | 2.3613787 |
| GO | protein-L-isoaspartate (D-aspartate) O-methyltransferase activity      | 1 | 3 | 0.132965 | 2.3613787 |
| GO | respiratory tube development                                           | 1 | 3 | 0.132965 | 2.3613787 |
| GO | proton-transporting two-sector ATPase complex, catalytic domain        | 1 | 3 | 0.132965 | 2.3613787 |
| GO | positive regulation of actin filament bundle assembly                  | 1 | 3 | 0.132965 | 2.3613787 |
| GO | protein kinase C signaling cascade                                     | 1 | 3 | 0.132965 | 2.3613787 |
| GO | epithelial cell proliferation involved in mammary gland duct elongatic | 1 | 3 | 0.132965 | 2.3613787 |
| GO | mammary gland branching involved in pregnancy                          | 1 | 3 | 0.132965 | 2.3613787 |
| GO | telomerase inhibitor activity                                          | 1 | 3 | 0.132965 | 2.3613787 |
| GO | telomere formation via telomerase                                      | 1 | 3 | 0.132965 | 2.3613787 |
| GO | maturation of LSU-rRNA from tricistronic rRNA transcript (SSU-rRNA,    | 1 | 3 | 0.132965 | 2.3613787 |
| GO | PeBoW complex                                                          | 1 | 3 | 0.132965 | 2.3613787 |
| GO | inositol 1,3,4,5 tetrakisphosphate binding                             | 1 | 3 | 0.132965 | 2.3613787 |
| GO | RNA methylation                                                        | 1 | 3 | 0.132965 | 2.3613787 |
| GO | Y-form DNA binding                                                     | 1 | 3 | 0.132965 | 2.3613787 |
| GO | peptidyl-amino acid modification                                       | 1 | 3 | 0.132965 | 2.3613787 |
| GO | cAMP metabolic process                                                 | 1 | 3 | 0.132965 | 2.3613787 |
| GO | fatty acid homeostasis                                                 | 1 | 3 | 0.132965 | 2.3613787 |
| GO | glycerophospholipid metabolic process                                  | 1 | 3 | 0.132965 | 2.3613787 |
| GO | B cell apoptosis                                                       | 1 | 3 | 0.132965 | 2.3613787 |
| GO | cleavage of lamin                                                      | 1 | 3 | 0.132965 | 2.3613787 |
| GO | transformed cell apoptosis                                             | 1 | 3 | 0.132965 | 2.3613787 |
| GO | choline binding                                                        | 1 | 3 | 0.132965 | 2.3613787 |
| GO | cholinesterase activity                                                | 1 | 3 | 0.132965 | 2.3613787 |
| GO | deoxyribonucleotide biosynthetic process                               | 1 | 3 | 0.132965 | 2.3613787 |
| GO | ribonucleoside-diphosphate reductase activity                          | 1 | 3 | 0.132965 | 2.3613787 |
| GO | regulation of anti-apoptosis                                           | 1 | 3 | 0.132965 | 2.3613787 |

|                                                                                |   |   |          |           |
|--------------------------------------------------------------------------------|---|---|----------|-----------|
| GO chromocenter                                                                | 1 | 3 | 0.132965 | 2.3613787 |
| GO G-quadruplex DNA binding                                                    | 1 | 3 | 0.132965 | 2.3613787 |
| GO replication fork protection                                                 | 1 | 3 | 0.132965 | 2.3613787 |
| GO olfactory receptor binding                                                  | 1 | 3 | 0.132965 | 2.3613787 |
| GO axon extension involved in axon guidance                                    | 1 | 3 | 0.132965 | 2.3613787 |
| GO chemorepulsion involved in embryonic olfactory bulb interneuron migration   | 1 | 3 | 0.132965 | 2.3613787 |
| GO negative regulation of chemokine-mediated signaling pathway                 | 1 | 3 | 0.132965 | 2.3613787 |
| GO response to cortisol stimulus                                               | 1 | 3 | 0.132965 | 2.3613787 |
| GO Roundabout signaling pathway                                                | 1 | 3 | 0.132965 | 2.3613787 |
| GO miRNA binding                                                               | 1 | 3 | 0.132965 | 2.3613787 |
| GO olfactory placode formation                                                 | 1 | 3 | 0.132965 | 2.3613787 |
| GO positive regulation of epithelial cell differentiation                      | 1 | 3 | 0.132965 | 2.3613787 |
| GO BH domain binding                                                           | 1 | 3 | 0.132965 | 2.3613787 |
| GO prostate gland morphogenesis                                                | 1 | 3 | 0.132965 | 2.3613787 |
| GO microtubule severing                                                        | 1 | 3 | 0.132965 | 2.3613787 |
| GO common-partner SMAD protein phosphorylation                                 | 1 | 3 | 0.132965 | 2.3613787 |
| GO sulfate assimilation                                                        | 1 | 3 | 0.132965 | 2.3613787 |
| GO potassium ion transmembrane transporter activity                            | 1 | 3 | 0.132965 | 2.3613787 |
| GO positive regulation of transcription from RNA polymerase II promoter        | 1 | 3 | 0.132965 | 2.3613787 |
| GO transforming growth factor beta receptor activity, type I                   | 1 | 3 | 0.132965 | 2.3613787 |
| GO transforming growth factor beta receptor complex                            | 1 | 3 | 0.132965 | 2.3613787 |
| GO bleb                                                                        | 1 | 3 | 0.132965 | 2.3613787 |
| GO response to organophosphorus                                                | 1 | 3 | 0.132965 | 2.3613787 |
| GO mesenchymal to epithelial transition                                        | 1 | 3 | 0.132965 | 2.3613787 |
| GO calcium ion-dependent exocytosis of neurotransmitter                        | 1 | 3 | 0.132965 | 2.3613787 |
| GO cellular chloride ion homeostasis                                           | 1 | 3 | 0.132965 | 2.3613787 |
| GO cerebellar Purkinje cell layer development                                  | 1 | 3 | 0.132965 | 2.3613787 |
| GO gamma-aminobutyric acid secretion                                           | 1 | 3 | 0.132965 | 2.3613787 |
| GO neurotransmitter metabolic process                                          | 1 | 3 | 0.132965 | 2.3613787 |
| GO retinal rod cell development                                                | 1 | 3 | 0.132965 | 2.3613787 |
| GO transferase activity, transferring acyl groups other than amino-acyl groups | 1 | 3 | 0.132965 | 2.3613787 |
| GO maintenance of mitotic sister chromatid cohesion                            | 1 | 3 | 0.132965 | 2.3613787 |
| GO spermidine biosynthetic process                                             | 1 | 3 | 0.132965 | 2.3613787 |
| GO phagocytosis, recognition                                                   | 1 | 3 | 0.132965 | 2.3613787 |
| GO ER to Golgi transport vesicle                                               | 1 | 3 | 0.132965 | 2.3613787 |
| GO ribonucleoside binding                                                      | 1 | 3 | 0.132965 | 2.3613787 |
| GO malate-aspartate shuttle                                                    | 1 | 3 | 0.132965 | 2.3613787 |
| GO negative regulation of keratinocyte differentiation                         | 1 | 3 | 0.132965 | 2.3613787 |
| GO replicative cell aging                                                      | 1 | 3 | 0.132965 | 2.3613787 |
| GO response to tumor cell                                                      | 1 | 3 | 0.132965 | 2.3613787 |
| GO proline catabolic process                                                   | 1 | 3 | 0.132965 | 2.3613787 |
| GO growth hormone receptor signaling pathway                                   | 1 | 3 | 0.132965 | 2.3613787 |
| GO female pronucleus                                                           | 1 | 3 | 0.132965 | 2.3613787 |
| GO cellular response to nutrient                                               | 1 | 3 | 0.132965 | 2.3613787 |
| GO response to vitamin E                                                       | 1 | 3 | 0.132965 | 2.3613787 |
| GO regulation of dendrite development                                          | 1 | 3 | 0.132965 | 2.3613787 |
| GO Fanconi anaemia nuclear complex                                             | 1 | 3 | 0.132965 | 2.3613787 |
| GO negative regulation of estrogen receptor signaling pathway                  | 1 | 3 | 0.132965 | 2.3613787 |
| GO sodium:bicarbonate symporter activity                                       | 1 | 3 | 0.132965 | 2.3613787 |

|    |                                                                    |     |      |          |            |
|----|--------------------------------------------------------------------|-----|------|----------|------------|
| GO | GABA-B receptor activity                                           | 1   | 3    | 0.132965 | 2.3613787  |
| GO | apoptosis                                                          | 26  | 444  | 0.133937 | 1.22750994 |
| GO | double-stranded DNA binding                                        | 6   | 75   | 0.134978 | 1.38365311 |
| GO | regulation of axonogenesis                                         | 2   | 14   | 0.135688 | 1.71482394 |
| GO | senescence                                                         | 2   | 14   | 0.135688 | 1.71482394 |
| GO | synaptic transmission, cholinergic                                 | 2   | 14   | 0.135688 | 1.71482394 |
| GO | selenium binding                                                   | 2   | 14   | 0.135688 | 1.71482394 |
| GO | DNA methylation                                                    | 2   | 14   | 0.135688 | 1.71482394 |
| GO | regulation of sensory perception of pain                           | 2   | 14   | 0.135688 | 1.71482394 |
| GO | acyl-CoA metabolic process                                         | 2   | 14   | 0.135688 | 1.71482394 |
| GO | isoprenoid biosynthetic process                                    | 2   | 14   | 0.135688 | 1.71482394 |
| GO | behavioral fear response                                           | 2   | 14   | 0.135688 | 1.71482394 |
| GO | regulation of action potential in neuron                           | 2   | 14   | 0.135688 | 1.71482394 |
| GO | kinesin complex                                                    | 2   | 14   | 0.135688 | 1.71482394 |
| GO | Wnt-protein binding                                                | 2   | 14   | 0.135688 | 1.71482394 |
| GO | dystrophin-associated glycoprotein complex                         | 2   | 14   | 0.135688 | 1.71482394 |
| GO | DNA damage response, signal transduction by p53 class mediator res | 2   | 14   | 0.135688 | 1.71482394 |
| GO | cell fate specification                                            | 2   | 14   | 0.135688 | 1.71482394 |
| GO | ubiquitin-protein ligase activity                                  | 10  | 145  | 0.137709 | 1.29365694 |
| GO | nuclear mRNA splicing, via spliceosome                             | 4   | 43   | 0.137749 | 1.45305721 |
| GO | nucleoside-triphosphatase activity                                 | 5   | 59   | 0.138199 | 1.40018705 |
| GO | single fertilization                                               | 3   | 28   | 0.138918 | 1.52736059 |
| GO | regulation of cell migration                                       | 3   | 28   | 0.138918 | 1.52736059 |
| GO | RNA polymerase II transcription mediator activity                  | 3   | 28   | 0.138918 | 1.52736059 |
| GO | camera-type eye development                                        | 3   | 28   | 0.138918 | 1.52736059 |
| GO | integrin complex                                                   | 3   | 28   | 0.138918 | 1.52736059 |
| GO | lactation                                                          | 3   | 28   | 0.138918 | 1.52736059 |
| GO | protein oligomerization                                            | 3   | 28   | 0.138918 | 1.52736059 |
| GO | nucleus                                                            | 234 | 4735 | 0.139538 | 1.12317435 |
| GO | cellular calcium ion homeostasis                                   | 5   | 60   | 0.14539  | 1.35997086 |
| GO | pattern specification process                                      | 4   | 44   | 0.146317 | 1.40317986 |
| GO | ubiquitin protein ligase binding                                   | 4   | 44   | 0.146317 | 1.40317986 |
| GO | scavenger receptor activity                                        | 4   | 44   | 0.146317 | 1.40317986 |
| GO | protein homotetramerization                                        | 3   | 29   | 0.149916 | 1.45982357 |
| GO | androgen receptor binding                                          | 3   | 29   | 0.149916 | 1.45982357 |
| GO | metanephros development                                            | 3   | 29   | 0.149916 | 1.45982357 |
| GO | chaperone binding                                                  | 3   | 29   | 0.149916 | 1.45982357 |
| GO | ruffle membrane                                                    | 3   | 29   | 0.149916 | 1.45982357 |
| GO | neuronal cell body                                                 | 10  | 148  | 0.1511   | 1.22594612 |
| GO | cellular response to extracellular stimulus                        | 2   | 15   | 0.151963 | 1.59971747 |
| GO | neural tube development                                            | 2   | 15   | 0.151963 | 1.59971747 |
| GO | protein disulfide oxidoreductase activity                          | 2   | 15   | 0.151963 | 1.59971747 |
| GO | acyl-CoA binding                                                   | 2   | 15   | 0.151963 | 1.59971747 |
| GO | cellular component organization                                    | 2   | 15   | 0.151963 | 1.59971747 |
| GO | estrogen receptor binding                                          | 2   | 15   | 0.151963 | 1.59971747 |
| GO | protein amino acid methylation                                     | 2   | 15   | 0.151963 | 1.59971747 |
| GO | male germ cell nucleus                                             | 2   | 15   | 0.151963 | 1.59971747 |
| GO | phosphatidylinositol-4,5-bisphosphate binding                      | 2   | 15   | 0.151963 | 1.59971747 |
| GO | double-strand break repair via homologous recombination            | 2   | 15   | 0.151963 | 1.59971747 |

|    |                                                                     |    |     |          |            |
|----|---------------------------------------------------------------------|----|-----|----------|------------|
| GO | actin filament-based movement                                       | 2  | 15  | 0.151963 | 1.59971747 |
| GO | ATP-dependent helicase activity                                     | 5  | 61  | 0.152736 | 1.32051163 |
| GO | axonogenesis                                                        | 5  | 61  | 0.152736 | 1.32051163 |
| GO | protein tyrosine kinase activity                                    | 6  | 78  | 0.153976 | 1.28177323 |
| GO | proteinaceous extracellular matrix                                  | 14 | 223 | 0.156532 | 1.16613896 |
| GO | multicellular organismal development                                | 48 | 890 | 0.157102 | 1.08749484 |
| GO | cell differentiation                                                | 27 | 474 | 0.160227 | 1.10206193 |
| GO | nuclear matrix                                                      | 5  | 62  | 0.160235 | 1.28178059 |
| GO | extracellular matrix organization                                   | 5  | 62  | 0.160235 | 1.28178059 |
| GO | response to organic nitrogen                                        | 3  | 30  | 0.16118  | 1.39500132 |
| GO | cellular response to insulin stimulus                               | 4  | 46  | 0.164045 | 1.30725358 |
| GO | regulation of small GTPase mediated signal transduction             | 4  | 46  | 0.164045 | 1.30725358 |
| GO | extracellular ligand-gated ion channel activity                     | 4  | 46  | 0.164045 | 1.30725358 |
| GO | response to calcium ion                                             | 4  | 46  | 0.164045 | 1.30725358 |
| GO | organ morphogenesis                                                 | 8  | 115 | 0.165995 | 1.18181971 |
| GO | regulation of transcription from RNA polymerase II promoter         | 13 | 207 | 0.167168 | 1.12453635 |
| GO | gap junction                                                        | 2  | 16  | 0.168591 | 1.49376573 |
| GO | regulation of the force of heart contraction                        | 2  | 16  | 0.168591 | 1.49376573 |
| GO | regulation of GTPase activity                                       | 2  | 16  | 0.168591 | 1.49376573 |
| GO | nicotinic acetylcholine-activated cation-selective channel activity | 2  | 16  | 0.168591 | 1.49376573 |
| GO | nicotinic acetylcholine-gated receptor-channel complex              | 2  | 16  | 0.168591 | 1.49376573 |
| GO | purine nucleotide biosynthetic process                              | 2  | 16  | 0.168591 | 1.49376573 |
| GO | mitochondrial envelope                                              | 2  | 16  | 0.168591 | 1.49376573 |
| GO | neuron apoptosis                                                    | 2  | 16  | 0.168591 | 1.49376573 |
| GO | negative regulation of MAP kinase activity                          | 2  | 16  | 0.168591 | 1.49376573 |
| GO | carbonate dehydratase activity                                      | 2  | 16  | 0.168591 | 1.49376573 |
| GO | DNA-dependent DNA replication initiation                            | 2  | 16  | 0.168591 | 1.49376573 |
| GO | cerebral cortex development                                         | 2  | 16  | 0.168591 | 1.49376573 |
| GO | hair follicle morphogenesis                                         | 2  | 16  | 0.168591 | 1.49376573 |
| GO | spliceosome assembly                                                | 2  | 16  | 0.168591 | 1.49376573 |
| GO | stereocilium                                                        | 2  | 16  | 0.168591 | 1.49376573 |
| GO | cellular component movement                                         | 7  | 98  | 0.170532 | 1.17836476 |
| GO | mediator complex                                                    | 3  | 31  | 0.172689 | 1.33268421 |
| GO | SMAD binding                                                        | 3  | 31  | 0.172689 | 1.33268421 |
| GO | MAPKKK cascade                                                      | 3  | 31  | 0.172689 | 1.33268421 |
| GO | embryonic digit morphogenesis                                       | 3  | 31  | 0.172689 | 1.33268421 |
| GO | ATPase activity, coupled to transmembrane movement of substances    | 3  | 31  | 0.172689 | 1.33268421 |
| GO | keratinization                                                      | 3  | 31  | 0.172689 | 1.33268421 |
| GO | chromosome, centromeric region                                      | 4  | 47  | 0.173185 | 1.26107566 |
| GO | RPTP-like protein binding                                           | 1  | 4   | 0.173239 | 1.93471296 |
| GO | ATP-dependent protein binding                                       | 1  | 4   | 0.173239 | 1.93471296 |
| GO | phenylalanyl-tRNA aminoacylation                                    | 1  | 4   | 0.173239 | 1.93471296 |
| GO | excitatory synapse                                                  | 1  | 4   | 0.173239 | 1.93471296 |
| GO | positive regulation of programmed cell death                        | 1  | 4   | 0.173239 | 1.93471296 |
| GO | hindbrain morphogenesis                                             | 1  | 4   | 0.173239 | 1.93471296 |
| GO | positive regulation of protein amino acid dephosphorylation         | 1  | 4   | 0.173239 | 1.93471296 |
| GO | U4/U6 x U5 tri-snRNP complex                                        | 1  | 4   | 0.173239 | 1.93471296 |
| GO | box C/D snoRNP complex                                              | 1  | 4   | 0.173239 | 1.93471296 |
| GO | compartment pattern formation                                       | 1  | 4   | 0.173239 | 1.93471296 |

|    |                                                                       |   |   |          |            |
|----|-----------------------------------------------------------------------|---|---|----------|------------|
| GO | protein amino acid geranylgeranylation                                | 1 | 4 | 0.173239 | 1.93471296 |
| GO | Rab geranylgeranyltransferase activity                                | 1 | 4 | 0.173239 | 1.93471296 |
| GO | regulation of dendrite morphogenesis                                  | 1 | 4 | 0.173239 | 1.93471296 |
| GO | transmembrane receptor protein tyrosine kinase signaling protein act  | 1 | 4 | 0.173239 | 1.93471296 |
| GO | TOR signaling pathway                                                 | 1 | 4 | 0.173239 | 1.93471296 |
| GO | 9-cis-retinoic acid biosynthetic process                              | 1 | 4 | 0.173239 | 1.93471296 |
| GO | embryonic development ending in birth or egg hatching                 | 1 | 4 | 0.173239 | 1.93471296 |
| GO | hepatocyte differentiation                                            | 1 | 4 | 0.173239 | 1.93471296 |
| GO | pyrimidine dimer repair                                               | 1 | 4 | 0.173239 | 1.93471296 |
| GO | inner ear receptor cell differentiation                               | 1 | 4 | 0.173239 | 1.93471296 |
| GO | methylation-dependent chromatin silencing                             | 1 | 4 | 0.173239 | 1.93471296 |
| GO | unmethylated CpG binding                                              | 1 | 4 | 0.173239 | 1.93471296 |
| GO | U6 snRNA binding                                                      | 1 | 4 | 0.173239 | 1.93471296 |
| GO | phosphopyruvate hydratase activity                                    | 1 | 4 | 0.173239 | 1.93471296 |
| GO | phosphopyruvate hydratase complex                                     | 1 | 4 | 0.173239 | 1.93471296 |
| GO | regulation of microtubule polymerization or depolymerization          | 1 | 4 | 0.173239 | 1.93471296 |
| GO | paranode region of axon                                               | 1 | 4 | 0.173239 | 1.93471296 |
| GO | arachidonic acid binding                                              | 1 | 4 | 0.173239 | 1.93471296 |
| GO | detection of mechanical stimulus involved in sensory perception of p  | 1 | 4 | 0.173239 | 1.93471296 |
| GO | fatty acid alpha-oxidation                                            | 1 | 4 | 0.173239 | 1.93471296 |
| GO | hindgut morphogenesis                                                 | 1 | 4 | 0.173239 | 1.93471296 |
| GO | mammary gland duct morphogenesis                                      | 1 | 4 | 0.173239 | 1.93471296 |
| GO | smoothened signaling pathway involved in regulation of granule cell p | 1 | 4 | 0.173239 | 1.93471296 |
| GO | procollagen-proline 4-dioxygenase activity                            | 1 | 4 | 0.173239 | 1.93471296 |
| GO | ubiquitin conjugating enzyme binding                                  | 1 | 4 | 0.173239 | 1.93471296 |
| GO | epithelial cell maturation                                            | 1 | 4 | 0.173239 | 1.93471296 |
| GO | positive regulation of exit from mitosis                              | 1 | 4 | 0.173239 | 1.93471296 |
| GO | protein complex localization                                          | 1 | 4 | 0.173239 | 1.93471296 |
| GO | regulation of cholesterol transport                                   | 1 | 4 | 0.173239 | 1.93471296 |
| GO | axon regeneration in the peripheral nervous system                    | 1 | 4 | 0.173239 | 1.93471296 |
| GO | Cdc42 protein signal transduction                                     | 1 | 4 | 0.173239 | 1.93471296 |
| GO | cGMP-mediated signaling                                               | 1 | 4 | 0.173239 | 1.93471296 |
| GO | death-inducing signaling complex                                      | 1 | 4 | 0.173239 | 1.93471296 |
| GO | megakaryocyte differentiation                                         | 1 | 4 | 0.173239 | 1.93471296 |
| GO | hemoglobin biosynthetic process                                       | 1 | 4 | 0.173239 | 1.93471296 |
| GO | negative regulation of follicle-stimulating hormone secretion         | 1 | 4 | 0.173239 | 1.93471296 |
| GO | negative regulation of macrophage differentiation                     | 1 | 4 | 0.173239 | 1.93471296 |
| GO | apoptotic cell clearance                                              | 1 | 4 | 0.173239 | 1.93471296 |
| GO | negative regulation of lipid storage                                  | 1 | 4 | 0.173239 | 1.93471296 |
| GO | negative regulation of lipid transport                                | 1 | 4 | 0.173239 | 1.93471296 |
| GO | G-protein activated inward rectifier potassium channel activity       | 1 | 4 | 0.173239 | 1.93471296 |
| GO | RNA 3'-end processing                                                 | 1 | 4 | 0.173239 | 1.93471296 |
| GO | negative regulation of appetite                                       | 1 | 4 | 0.173239 | 1.93471296 |
| GO | regulation of intestinal cholesterol absorption                       | 1 | 4 | 0.173239 | 1.93471296 |
| GO | pachytene                                                             | 1 | 4 | 0.173239 | 1.93471296 |
| GO | forebrain neuron development                                          | 1 | 4 | 0.173239 | 1.93471296 |
| GO | positive regulation of keratinocyte migration                         | 1 | 4 | 0.173239 | 1.93471296 |
| GO | somatic recombination of immunoglobulin gene segments                 | 1 | 4 | 0.173239 | 1.93471296 |
| GO | progesterone receptor signaling pathway                               | 1 | 4 | 0.173239 | 1.93471296 |

|                                                                   |   |   |          |            |
|-------------------------------------------------------------------|---|---|----------|------------|
| GO receptor catabolic process                                     | 1 | 4 | 0.173239 | 1.93471296 |
| GO positive regulation of adenylate cyclase activity              | 1 | 4 | 0.173239 | 1.93471296 |
| GO positive regulation of Rac protein signal transduction         | 1 | 4 | 0.173239 | 1.93471296 |
| GO ERK1 and ERK2 cascade                                          | 1 | 4 | 0.173239 | 1.93471296 |
| GO positive regulation of ion transport                           | 1 | 4 | 0.173239 | 1.93471296 |
| GO cellular response to chemical stimulus                         | 1 | 4 | 0.173239 | 1.93471296 |
| GO Golgi cis cisterna                                             | 1 | 4 | 0.173239 | 1.93471296 |
| GO protein repair                                                 | 1 | 4 | 0.173239 | 1.93471296 |
| GO cytokine biosynthetic process                                  | 1 | 4 | 0.173239 | 1.93471296 |
| GO nerve growth factor processing                                 | 1 | 4 | 0.173239 | 1.93471296 |
| GO platelet aggregation                                           | 1 | 4 | 0.173239 | 1.93471296 |
| GO positive regulation of platelet activation                     | 1 | 4 | 0.173239 | 1.93471296 |
| GO regulation of transcription from RNA polymerase I promoter     | 1 | 4 | 0.173239 | 1.93471296 |
| GO peroxisome proliferator activated receptor binding             | 1 | 4 | 0.173239 | 1.93471296 |
| GO retinoic acid receptor binding                                 | 1 | 4 | 0.173239 | 1.93471296 |
| GO positive regulation of telomerase activity                     | 1 | 4 | 0.173239 | 1.93471296 |
| GO DNA primase activity                                           | 1 | 4 | 0.173239 | 1.93471296 |
| GO DNA replication, synthesis of RNA primer                       | 1 | 4 | 0.173239 | 1.93471296 |
| GO peptide-aspartate beta-dioxygenase activity                    | 1 | 4 | 0.173239 | 1.93471296 |
| GO glycerol-3-phosphate O-acyltransferase activity                | 1 | 4 | 0.173239 | 1.93471296 |
| GO mitochondrial fusion                                           | 1 | 4 | 0.173239 | 1.93471296 |
| GO regulation of protein heterodimerization activity              | 1 | 4 | 0.173239 | 1.93471296 |
| GO choline metabolic process                                      | 1 | 4 | 0.173239 | 1.93471296 |
| GO outer ear morphogenesis                                        | 1 | 4 | 0.173239 | 1.93471296 |
| GO ventricular septum development                                 | 1 | 4 | 0.173239 | 1.93471296 |
| GO monocyte chemotaxis                                            | 1 | 4 | 0.173239 | 1.93471296 |
| GO positive regulation of macrophage chemotaxis                   | 1 | 4 | 0.173239 | 1.93471296 |
| GO bubble DNA binding                                             | 1 | 4 | 0.173239 | 1.93471296 |
| GO lateral element                                                | 1 | 4 | 0.173239 | 1.93471296 |
| GO calcium ion transmembrane transporter activity                 | 1 | 4 | 0.173239 | 1.93471296 |
| GO calcium:sodium antiporter activity                             | 1 | 4 | 0.173239 | 1.93471296 |
| GO sodium ion transmembrane transporter activity                  | 1 | 4 | 0.173239 | 1.93471296 |
| GO Roundabout binding                                             | 1 | 4 | 0.173239 | 1.93471296 |
| GO lens induction in camera-type eye                              | 1 | 4 | 0.173239 | 1.93471296 |
| GO Sertoli cell development                                       | 1 | 4 | 0.173239 | 1.93471296 |
| GO intermediate filament cytoskeleton organization                | 1 | 4 | 0.173239 | 1.93471296 |
| GO soft palate development                                        | 1 | 4 | 0.173239 | 1.93471296 |
| GO cardiac myofibril assembly                                     | 1 | 4 | 0.173239 | 1.93471296 |
| GO negative regulation of membrane protein ectodomain proteolysis | 1 | 4 | 0.173239 | 1.93471296 |
| GO calcium channel inhibitor activity                             | 1 | 4 | 0.173239 | 1.93471296 |
| GO negative regulation of ATPase activity                         | 1 | 4 | 0.173239 | 1.93471296 |
| GO troponin C binding                                             | 1 | 4 | 0.173239 | 1.93471296 |
| GO troponin T binding                                             | 1 | 4 | 0.173239 | 1.93471296 |
| GO ISG15-protein conjugation                                      | 1 | 4 | 0.173239 | 1.93471296 |
| GO protein sumoylation                                            | 1 | 4 | 0.173239 | 1.93471296 |
| GO high voltage-gated calcium channel activity                    | 1 | 4 | 0.173239 | 1.93471296 |
| GO pantothenate kinase activity                                   | 1 | 4 | 0.173239 | 1.93471296 |
| GO AT DNA binding                                                 | 1 | 4 | 0.173239 | 1.93471296 |
| GO galactose binding                                              | 1 | 4 | 0.173239 | 1.93471296 |

|    |                                                                      |   |     |          |            |
|----|----------------------------------------------------------------------|---|-----|----------|------------|
| GO | aspartate transport                                                  | 1 | 4   | 0.173239 | 1.93471296 |
| GO | L-aspartate transmembrane transporter activity                       | 1 | 4   | 0.173239 | 1.93471296 |
| GO | urinary bladder development                                          | 1 | 4   | 0.173239 | 1.93471296 |
| GO | growth hormone receptor binding                                      | 1 | 4   | 0.173239 | 1.93471296 |
| GO | tRNA methylation                                                     | 1 | 4   | 0.173239 | 1.93471296 |
| GO | cardiac cell differentiation                                         | 1 | 4   | 0.173239 | 1.93471296 |
| GO | metabotropic glutamate receptor signaling pathway                    | 1 | 4   | 0.173239 | 1.93471296 |
| GO | NADP metabolic process                                               | 1 | 4   | 0.173239 | 1.93471296 |
| GO | NADPH:quinone reductase activity                                     | 1 | 4   | 0.173239 | 1.93471296 |
| GO | heparan sulfate proteoglycan biosynthetic process, polysaccharide ch | 1 | 4   | 0.173239 | 1.93471296 |
| GO | cell proliferation in forebrain                                      | 1 | 4   | 0.173239 | 1.93471296 |
| GO | embryonic morphogenesis                                              | 1 | 4   | 0.173239 | 1.93471296 |
| GO | chromatin                                                            | 6 | 81  | 0.174077 | 1.18419299 |
| GO | Ras protein signal transduction                                      | 5 | 64  | 0.175662 | 1.20639565 |
| GO | kinase activity                                                      | 8 | 117 | 0.177237 | 1.13080601 |
| GO | nucleosome assembly                                                  | 5 | 65  | 0.183581 | 1.16969159 |
| GO | neural tube closure                                                  | 3 | 32  | 0.184422 | 1.27268521 |
| GO | peptidyl-tyrosine phosphorylation                                    | 3 | 32  | 0.184422 | 1.27268521 |
| GO | regulation of G-protein coupled receptor protein signaling pathway   | 3 | 32  | 0.184422 | 1.27268521 |
| GO | regulation of gene expression                                        | 3 | 32  | 0.184422 | 1.27268521 |
| GO | positive regulation of cell differentiation                          | 2 | 17  | 0.185506 | 1.39565551 |
| GO | guanyl nucleotide binding                                            | 2 | 17  | 0.185506 | 1.39565551 |
| GO | regulation of excitatory postsynaptic membrane potential             | 2 | 17  | 0.185506 | 1.39565551 |
| GO | positive regulation of DNA repair                                    | 2 | 17  | 0.185506 | 1.39565551 |
| GO | anchored to plasma membrane                                          | 2 | 17  | 0.185506 | 1.39565551 |
| GO | purine ribonucleoside monophosphate biosynthetic process             | 2 | 17  | 0.185506 | 1.39565551 |
| GO | negative regulation of osteoblast differentiation                    | 2 | 17  | 0.185506 | 1.39565551 |
| GO | regulation of long-term neuronal synaptic plasticity                 | 2 | 17  | 0.185506 | 1.39565551 |
| GO | cytoplasmic microtubule                                              | 2 | 17  | 0.185506 | 1.39565551 |
| GO | DNA damage response, signal transduction resulting in induction of a | 2 | 17  | 0.185506 | 1.39565551 |
| GO | cAMP binding                                                         | 2 | 17  | 0.185506 | 1.39565551 |
| GO | positive regulation of pathway-restricted SMAD protein phosphorylat  | 2 | 17  | 0.185506 | 1.39565551 |
| GO | male genitalia development                                           | 2 | 17  | 0.185506 | 1.39565551 |
| GO | nucleobase, nucleoside, nucleotide and nucleic acid metabolic proces | 5 | 66  | 0.191627 | 1.13361519 |
| GO | biosynthetic process                                                 | 4 | 49  | 0.191968 | 1.17200174 |
| GO | PDZ domain binding                                                   | 4 | 49  | 0.191968 | 1.17200174 |
| GO | microtubule-based movement                                           | 6 | 84  | 0.195185 | 1.0905498  |
| GO | actin filament binding                                               | 4 | 50  | 0.20159  | 1.12900222 |
| GO | response to estrogen stimulus                                        | 4 | 50  | 0.20159  | 1.12900222 |
| GO | response to cytokine stimulus                                        | 4 | 50  | 0.20159  | 1.12900222 |
| GO | rRNA processing                                                      | 6 | 85  | 0.202427 | 1.06015394 |
| GO | inward rectifier potassium channel activity                          | 2 | 18  | 0.202644 | 1.30432814 |
| GO | ADP binding                                                          | 2 | 18  | 0.202644 | 1.30432814 |
| GO | proton-transporting ATPase activity, rotational mechanism            | 2 | 18  | 0.202644 | 1.30432814 |
| GO | hydrolase activity, acting on ester bonds                            | 2 | 18  | 0.202644 | 1.30432814 |
| GO | response to activity                                                 | 2 | 18  | 0.202644 | 1.30432814 |
| GO | negative regulation of apoptosis                                     | 9 | 140 | 0.203682 | 1.00689751 |
| GO | calmodulin binding                                                   | 9 | 140 | 0.203682 | 1.00689751 |
| GO | protein homooligomerization                                          | 5 | 68  | 0.20808  | 1.06325857 |



|    |                                                                         |     |      |          |            |
|----|-------------------------------------------------------------------------|-----|------|----------|------------|
| GO | receptor signaling protein activity                                     | 3   | 34   | 0.208472 | 1.15898847 |
| GO | cytokinesis                                                             | 3   | 34   | 0.208472 | 1.15898847 |
| GO | perikaryon                                                              | 3   | 34   | 0.208472 | 1.15898847 |
| GO | PML body                                                                | 3   | 34   | 0.208472 | 1.15898847 |
| GO | transmembrane transport                                                 | 27  | 492  | 0.210605 | 0.90078706 |
| GO | plasma membrane                                                         | 137 | 2763 | 0.210825 | 0.84862898 |
| GO | GTPase activity                                                         | 12  | 198  | 0.210994 | 0.95196032 |
| GO | phenylalanine-tRNA ligase activity                                      | 1   | 5    | 0.211645 | 1.63179848 |
| GO | negative regulation of Rho protein signal transduction                  | 1   | 5    | 0.211645 | 1.63179848 |
| GO | CRD-mediated mRNA stability complex                                     | 1   | 5    | 0.211645 | 1.63179848 |
| GO | CRD-mediated mRNA stabilization                                         | 1   | 5    | 0.211645 | 1.63179848 |
| GO | histone pre-mRNA 3'end processing complex                               | 1   | 5    | 0.211645 | 1.63179848 |
| GO | dichotomous subdivision of terminal units involved in salivary gland b  | 1   | 5    | 0.211645 | 1.63179848 |
| GO | outflow tract morphogenesis                                             | 1   | 5    | 0.211645 | 1.63179848 |
| GO | negative regulation of cardiac muscle hypertrophy                       | 1   | 5    | 0.211645 | 1.63179848 |
| GO | type 1 angiotensin receptor binding                                     | 1   | 5    | 0.211645 | 1.63179848 |
| GO | negative regulation of astrocyte differentiation                        | 1   | 5    | 0.211645 | 1.63179848 |
| GO | negative regulation of Notch signaling pathway                          | 1   | 5    | 0.211645 | 1.63179848 |
| GO | epithelial cell-cell adhesion                                           | 1   | 5    | 0.211645 | 1.63179848 |
| GO | positive regulation of receptor recycling                               | 1   | 5    | 0.211645 | 1.63179848 |
| GO | transcription-coupled nucleotide-excision repair                        | 1   | 5    | 0.211645 | 1.63179848 |
| GO | collagen biosynthetic process                                           | 1   | 5    | 0.211645 | 1.63179848 |
| GO | positive regulation of triglyceride catabolic process                   | 1   | 5    | 0.211645 | 1.63179848 |
| GO | positive regulation of fibroblast growth factor receptor signaling path | 1   | 5    | 0.211645 | 1.63179848 |
| GO | vitamin D metabolic process                                             | 1   | 5    | 0.211645 | 1.63179848 |
| GO | establishment or maintenance of epithelial cell apical/basal polarity   | 1   | 5    | 0.211645 | 1.63179848 |
| GO | DNA catabolic process                                                   | 1   | 5    | 0.211645 | 1.63179848 |
| GO | dynactin complex                                                        | 1   | 5    | 0.211645 | 1.63179848 |
| GO | sulfate transmembrane transporter activity                              | 1   | 5    | 0.211645 | 1.63179848 |
| GO | peptidyl-lysine modification to hypusine                                | 1   | 5    | 0.211645 | 1.63179848 |
| GO | nucleobase, nucleoside, nucleotide kinase activity                      | 1   | 5    | 0.211645 | 1.63179848 |
| GO | chemorepellent activity                                                 | 1   | 5    | 0.211645 | 1.63179848 |
| GO | embryonic camera-type eye development                                   | 1   | 5    | 0.211645 | 1.63179848 |
| GO | embryonic eye morphogenesis                                             | 1   | 5    | 0.211645 | 1.63179848 |
| GO | face development                                                        | 1   | 5    | 0.211645 | 1.63179848 |
| GO | ribonuclease H activity                                                 | 1   | 5    | 0.211645 | 1.63179848 |
| GO | fibroblast growth factor receptor activity                              | 1   | 5    | 0.211645 | 1.63179848 |
| GO | neuronal action potential propagation                                   | 1   | 5    | 0.211645 | 1.63179848 |
| GO | protein maturation by protein folding                                   | 1   | 5    | 0.211645 | 1.63179848 |
| GO | protein refolding                                                       | 1   | 5    | 0.211645 | 1.63179848 |
| GO | ryanodine-sensitive calcium-release channel activity                    | 1   | 5    | 0.211645 | 1.63179848 |
| GO | long-chain fatty acid metabolic process                                 | 1   | 5    | 0.211645 | 1.63179848 |
| GO | response to gravity                                                     | 1   | 5    | 0.211645 | 1.63179848 |
| GO | thiamin pyrophosphate binding                                           | 1   | 5    | 0.211645 | 1.63179848 |
| GO | purine base biosynthetic process                                        | 1   | 5    | 0.211645 | 1.63179848 |
| GO | phosphatidylinositol transporter activity                               | 1   | 5    | 0.211645 | 1.63179848 |
| GO | dopamine receptor binding                                               | 1   | 5    | 0.211645 | 1.63179848 |
| GO | neuron remodeling                                                       | 1   | 5    | 0.211645 | 1.63179848 |
| GO | motile primary cilium                                                   | 1   | 5    | 0.211645 | 1.63179848 |

|    |                                                                    |   |   |          |            |
|----|--------------------------------------------------------------------|---|---|----------|------------|
| GO | spinal cord dorsal/ventral patterning                              | 1 | 5 | 0.211645 | 1.63179848 |
| GO | regulation of short-term neuronal synaptic plasticity              | 1 | 5 | 0.211645 | 1.63179848 |
| GO | nerve-nerve synaptic transmission                                  | 1 | 5 | 0.211645 | 1.63179848 |
| GO | neuromuscular process                                              | 1 | 5 | 0.211645 | 1.63179848 |
| GO | cartilage development involved in endochondral bone morphogenesis: | 1 | 5 | 0.211645 | 1.63179848 |
| GO | prostaglandin E receptor activity                                  | 1 | 5 | 0.211645 | 1.63179848 |
| GO | negative regulation of lipoprotein lipase activity                 | 1 | 5 | 0.211645 | 1.63179848 |
| GO | negative regulation of receptor-mediated endocytosis               | 1 | 5 | 0.211645 | 1.63179848 |
| GO | high-density lipoprotein particle assembly                         | 1 | 5 | 0.211645 | 1.63179848 |
| GO | high-density lipoprotein particle clearance                        | 1 | 5 | 0.211645 | 1.63179848 |
| GO | lipoprotein biosynthetic process                                   | 1 | 5 | 0.211645 | 1.63179848 |
| GO | lipoprotein catabolic process                                      | 1 | 5 | 0.211645 | 1.63179848 |
| GO | positive regulation of cGMP biosynthetic process                   | 1 | 5 | 0.211645 | 1.63179848 |
| GO | tau protein binding                                                | 1 | 5 | 0.211645 | 1.63179848 |
| GO | magnesium ion transport                                            | 1 | 5 | 0.211645 | 1.63179848 |
| GO | regulation of activin receptor signaling pathway                   | 1 | 5 | 0.211645 | 1.63179848 |
| GO | peptide hormone receptor binding                                   | 1 | 5 | 0.211645 | 1.63179848 |
| GO | endoderm formation                                                 | 1 | 5 | 0.211645 | 1.63179848 |
| GO | G-protein coupled receptor internalization                         | 1 | 5 | 0.211645 | 1.63179848 |
| GO | melanocortin receptor activity                                     | 1 | 5 | 0.211645 | 1.63179848 |
| GO | MutSalpha complex binding                                          | 1 | 5 | 0.211645 | 1.63179848 |
| GO | intra-S DNA damage checkpoint                                      | 1 | 5 | 0.211645 | 1.63179848 |
| GO | positive regulation of helicase activity                           | 1 | 5 | 0.211645 | 1.63179848 |
| GO | RNA polymerase binding                                             | 1 | 5 | 0.211645 | 1.63179848 |
| GO | forebrain morphogenesis                                            | 1 | 5 | 0.211645 | 1.63179848 |
| GO | myelination in the peripheral nervous system                       | 1 | 5 | 0.211645 | 1.63179848 |
| GO | negative regulation of neuroblast proliferation                    | 1 | 5 | 0.211645 | 1.63179848 |
| GO | structural constituent of nuclear pore                             | 1 | 5 | 0.211645 | 1.63179848 |
| GO | eukaryotic initiation factor 4E binding                            | 1 | 5 | 0.211645 | 1.63179848 |
| GO | gastric acid secretion                                             | 1 | 5 | 0.211645 | 1.63179848 |
| GO | positive regulation of uterine smooth muscle contraction           | 1 | 5 | 0.211645 | 1.63179848 |
| GO | sperm ejaculation                                                  | 1 | 5 | 0.211645 | 1.63179848 |
| GO | vasopressin receptor activity                                      | 1 | 5 | 0.211645 | 1.63179848 |
| GO | transepithelial chloride transport                                 | 1 | 5 | 0.211645 | 1.63179848 |
| GO | regulation of receptor activity                                    | 1 | 5 | 0.211645 | 1.63179848 |
| GO | protein kinase B binding                                           | 1 | 5 | 0.211645 | 1.63179848 |
| GO | proton-transporting two-sector ATPase complex                      | 1 | 5 | 0.211645 | 1.63179848 |
| GO | mammary gland branching involved in thelarche                      | 1 | 5 | 0.211645 | 1.63179848 |
| GO | neurotransmitter transporter activity                              | 1 | 5 | 0.211645 | 1.63179848 |
| GO | telomerase holoenzyme complex                                      | 1 | 5 | 0.211645 | 1.63179848 |
| GO | spindle midzone                                                    | 1 | 5 | 0.211645 | 1.63179848 |
| GO | Barr body                                                          | 1 | 5 | 0.211645 | 1.63179848 |
| GO | negative regulation of synaptic transmission                       | 1 | 5 | 0.211645 | 1.63179848 |
| GO | mesenchymal to epithelial transition involved in metanephros morph | 1 | 5 | 0.211645 | 1.63179848 |
| GO | regulation of binding                                              | 1 | 5 | 0.211645 | 1.63179848 |
| GO | luteolysis                                                         | 1 | 5 | 0.211645 | 1.63179848 |
| GO | regulation of caspase activity                                     | 1 | 5 | 0.211645 | 1.63179848 |
| GO | retina morphogenesis in camera-type eye                            | 1 | 5 | 0.211645 | 1.63179848 |
| GO | pro-B cell differentiation                                         | 1 | 5 | 0.211645 | 1.63179848 |

|    |                                                                        |    |     |          |            |
|----|------------------------------------------------------------------------|----|-----|----------|------------|
| GO | negative regulation of cellular component movement                     | 1  | 5   | 0.211645 | 1.63179848 |
| GO | microtubule-severing ATPase activity                                   | 1  | 5   | 0.211645 | 1.63179848 |
| GO | cellular response to indole-3-methanol                                 | 1  | 5   | 0.211645 | 1.63179848 |
| GO | skeletal muscle thin filament assembly                                 | 1  | 5   | 0.211645 | 1.63179848 |
| GO | response to cholesterol                                                | 1  | 5   | 0.211645 | 1.63179848 |
| GO | response to prostaglandin E stimulus                                   | 1  | 5   | 0.211645 | 1.63179848 |
| GO | oligopeptide transport                                                 | 1  | 5   | 0.211645 | 1.63179848 |
| GO | positive regulation of protein complex assembly                        | 1  | 5   | 0.211645 | 1.63179848 |
| GO | glomerular basement membrane development                               | 1  | 5   | 0.211645 | 1.63179848 |
| GO | glomerulus development                                                 | 1  | 5   | 0.211645 | 1.63179848 |
| GO | behavioral response to pain                                            | 1  | 5   | 0.211645 | 1.63179848 |
| GO | protein serine/threonine phosphatase inhibitor activity                | 1  | 5   | 0.211645 | 1.63179848 |
| GO | gamma-tubulin complex                                                  | 1  | 5   | 0.211645 | 1.63179848 |
| GO | mitochondrion transport along microtubule                              | 1  | 5   | 0.211645 | 1.63179848 |
| GO | transcription termination                                              | 1  | 5   | 0.211645 | 1.63179848 |
| GO | THO complex part of transcription export complex                       | 1  | 5   | 0.211645 | 1.63179848 |
| GO | THO complex                                                            | 1  | 5   | 0.211645 | 1.63179848 |
| GO | establishment of planar polarity                                       | 1  | 5   | 0.211645 | 1.63179848 |
| GO | multicellular organismal aging                                         | 1  | 5   | 0.211645 | 1.63179848 |
| GO | skin morphogenesis                                                     | 1  | 5   | 0.211645 | 1.63179848 |
| GO | mitotic cell cycle G2/M transition DNA damage checkpoint               | 1  | 5   | 0.211645 | 1.63179848 |
| GO | AP-type membrane coat adaptor complex                                  | 1  | 5   | 0.211645 | 1.63179848 |
| GO | regulation of cytoskeleton organization                                | 1  | 5   | 0.211645 | 1.63179848 |
| GO | regulation of smooth muscle cell differentiation                       | 1  | 5   | 0.211645 | 1.63179848 |
| GO | NADPH binding                                                          | 1  | 5   | 0.211645 | 1.63179848 |
| GO | ligand-gated ion channel activity                                      | 1  | 5   | 0.211645 | 1.63179848 |
| GO | G2/M transition of mitotic cell cycle                                  | 2  | 19  | 0.219949 | 1.21891896 |
| GO | hyaluronic acid binding                                                | 2  | 19  | 0.219949 | 1.21891896 |
| GO | nucleotide-excision repair, DNA damage removal                         | 2  | 19  | 0.219949 | 1.21891896 |
| GO | base-excision repair                                                   | 2  | 19  | 0.219949 | 1.21891896 |
| GO | GABA-A receptor activity                                               | 2  | 19  | 0.219949 | 1.21891896 |
| GO | extracellular-glutamate-gated ion channel activity                     | 2  | 19  | 0.219949 | 1.21891896 |
| GO | cofactor binding                                                       | 2  | 19  | 0.219949 | 1.21891896 |
| GO | cholesterol efflux                                                     | 2  | 19  | 0.219949 | 1.21891896 |
| GO | T cell differentiation                                                 | 2  | 19  | 0.219949 | 1.21891896 |
| GO | hydrolase activity, acting on acid anhydrides, in phosphorus-containir | 2  | 19  | 0.219949 | 1.21891896 |
| GO | actin cytoskeleton reorganization                                      | 2  | 19  | 0.219949 | 1.21891896 |
| GO | vesicle docking involved in exocytosis                                 | 2  | 19  | 0.219949 | 1.21891896 |
| GO | chromatin organization                                                 | 2  | 19  | 0.219949 | 1.21891896 |
| GO | negative regulation of adenylate cyclase activity                      | 2  | 19  | 0.219949 | 1.21891896 |
| GO | extracellular matrix                                                   | 3  | 35  | 0.220748 | 1.1050044  |
| GO | nucleosome                                                             | 4  | 52  | 0.221242 | 1.04584484 |
| GO | cell-cell adhesion                                                     | 5  | 70  | 0.224973 | 0.99516284 |
| GO | response to ethanol                                                    | 5  | 70  | 0.224973 | 0.99516284 |
| GO | intracellular signaling pathway                                        | 11 | 182 | 0.22649  | 0.90157392 |
| GO | serine-type endopeptidase activity                                     | 9  | 144 | 0.226633 | 0.91907705 |
| GO | helicase activity                                                      | 7  | 107 | 0.229277 | 0.93543342 |
| GO | double-strand break repair                                             | 3  | 36  | 0.233164 | 1.05276179 |
| GO | response to organic substance                                          | 3  | 36  | 0.233164 | 1.05276179 |

|    |                                                                       |    |     |          |            |
|----|-----------------------------------------------------------------------|----|-----|----------|------------|
| GO | skeletal muscle tissue development                                    | 3  | 36  | 0.233164 | 1.05276179 |
| GO | lamellipodium                                                         | 5  | 71  | 0.233568 | 0.96191615 |
| GO | regulation of Rho protein signal transduction                         | 5  | 71  | 0.233568 | 0.96191615 |
| GO | transmembrane receptor protein tyrosine kinase signaling pathway      | 5  | 71  | 0.233568 | 0.96191615 |
| GO | spermatogenesis                                                       | 15 | 261 | 0.233664 | 0.85248211 |
| GO | connexon complex                                                      | 2  | 20  | 0.237367 | 1.13871357 |
| GO | neural crest cell migration                                           | 2  | 20  | 0.237367 | 1.13871357 |
| GO | hippocampus development                                               | 2  | 20  | 0.237367 | 1.13871357 |
| GO | response to amphetamine                                               | 2  | 20  | 0.237367 | 1.13871357 |
| GO | L-ascorbic acid binding                                               | 2  | 20  | 0.237367 | 1.13871357 |
| GO | positive regulation of protein kinase B signaling cascade             | 2  | 20  | 0.237367 | 1.13871357 |
| GO | protein C-terminus binding                                            | 9  | 146 | 0.238457 | 0.87613922 |
| GO | proton transport                                                      | 4  | 54  | 0.24137  | 0.96619999 |
| GO | tight junction                                                        | 5  | 72  | 0.242255 | 0.92918048 |
| GO | cartilage development                                                 | 3  | 37  | 0.245701 | 1.0021492  |
| GO | NAD or NADH binding                                                   | 3  | 37  | 0.245701 | 1.0021492  |
| GO | podosome                                                              | 1  | 6   | 0.248268 | 1.39955154 |
| GO | pre-snoRNP complex                                                    | 1  | 6   | 0.248268 | 1.39955154 |
| GO | paraxial mesoderm development                                         | 1  | 6   | 0.248268 | 1.39955154 |
| GO | activation of transmembrane receptor protein tyrosine kinase activity | 1  | 6   | 0.248268 | 1.39955154 |
| GO | maintenance of gastrointestinal epithelium                            | 1  | 6   | 0.248268 | 1.39955154 |
| GO | poly(U) RNA binding                                                   | 1  | 6   | 0.248268 | 1.39955154 |
| GO | assembly of spliceosomal tri-snRNP                                    | 1  | 6   | 0.248268 | 1.39955154 |
| GO | RS domain binding                                                     | 1  | 6   | 0.248268 | 1.39955154 |
| GO | protein neddylation                                                   | 1  | 6   | 0.248268 | 1.39955154 |
| GO | fucose metabolic process                                              | 1  | 6   | 0.248268 | 1.39955154 |
| GO | amine metabolic process                                               | 1  | 6   | 0.248268 | 1.39955154 |
| GO | mitochondrial DNA replication                                         | 1  | 6   | 0.248268 | 1.39955154 |
| GO | S-adenosylhomocysteine metabolic process                              | 1  | 6   | 0.248268 | 1.39955154 |
| GO | endothelial cell differentiation                                      | 1  | 6   | 0.248268 | 1.39955154 |
| GO | aldehyde dehydrogenase [NAD(P)+] activity                             | 1  | 6   | 0.248268 | 1.39955154 |
| GO | retinoic acid metabolic process                                       | 1  | 6   | 0.248268 | 1.39955154 |
| GO | 5'-3' exonuclease activity                                            | 1  | 6   | 0.248268 | 1.39955154 |
| GO | regulation of ryanodine-sensitive calcium-release channel activity    | 1  | 6   | 0.248268 | 1.39955154 |
| GO | response to redox state                                               | 1  | 6   | 0.248268 | 1.39955154 |
| GO | regulation of Ras protein signal transduction                         | 1  | 6   | 0.248268 | 1.39955154 |
| GO | juxtaparanode region of axon                                          | 1  | 6   | 0.248268 | 1.39955154 |
| GO | aminomethyltransferase activity                                       | 1  | 6   | 0.248268 | 1.39955154 |
| GO | lipoic acid binding                                                   | 1  | 6   | 0.248268 | 1.39955154 |
| GO | glutathione binding                                                   | 1  | 6   | 0.248268 | 1.39955154 |
| GO | negative regulation of synaptic transmission, glutamatergic           | 1  | 6   | 0.248268 | 1.39955154 |
| GO | regulation of inhibitory postsynaptic membrane potential              | 1  | 6   | 0.248268 | 1.39955154 |
| GO | N-methyl-D-aspartate selective glutamate receptor activity            | 1  | 6   | 0.248268 | 1.39955154 |
| GO | startle response                                                      | 1  | 6   | 0.248268 | 1.39955154 |
| GO | glucocorticoid receptor binding                                       | 1  | 6   | 0.248268 | 1.39955154 |
| GO | Leydig cell differentiation                                           | 1  | 6   | 0.248268 | 1.39955154 |
| GO | forelimb morphogenesis                                                | 1  | 6   | 0.248268 | 1.39955154 |
| GO | hindlimb morphogenesis                                                | 1  | 6   | 0.248268 | 1.39955154 |
| GO | parturition                                                           | 1  | 6   | 0.248268 | 1.39955154 |

|    |                                                                         |   |   |          |            |
|----|-------------------------------------------------------------------------|---|---|----------|------------|
| GO | very-low-density lipoprotein particle assembly                          | 1 | 6 | 0.248268 | 1.39955154 |
| GO | extrinsic to external side of plasma membrane                           | 1 | 6 | 0.248268 | 1.39955154 |
| GO | negative regulation of platelet activation                              | 1 | 6 | 0.248268 | 1.39955154 |
| GO | very-low-density lipoprotein particle remodeling                        | 1 | 6 | 0.248268 | 1.39955154 |
| GO | interleukin-1 receptor antagonist activity                              | 1 | 6 | 0.248268 | 1.39955154 |
| GO | pre-microRNA processing                                                 | 1 | 6 | 0.248268 | 1.39955154 |
| GO | regulation of steroid biosynthetic process                              | 1 | 6 | 0.248268 | 1.39955154 |
| GO | centromeric DNA binding                                                 | 1 | 6 | 0.248268 | 1.39955154 |
| GO | MutLalpha complex binding                                               | 1 | 6 | 0.248268 | 1.39955154 |
| GO | cellular response to UV                                                 | 1 | 6 | 0.248268 | 1.39955154 |
| GO | glucocorticoid receptor signaling pathway                               | 1 | 6 | 0.248268 | 1.39955154 |
| GO | regulation of synaptic transmission, GABAergic                          | 1 | 6 | 0.248268 | 1.39955154 |
| GO | striated muscle cell differentiation                                    | 1 | 6 | 0.248268 | 1.39955154 |
| GO | positive regulation of synaptic transmission, GABAergic                 | 1 | 6 | 0.248268 | 1.39955154 |
| GO | positive regulation of synaptogenesis                                   | 1 | 6 | 0.248268 | 1.39955154 |
| GO | DNA damage response, signal transduction by p53 class mediator          | 1 | 6 | 0.248268 | 1.39955154 |
| GO | proton-transporting ATP synthase complex, coupling factor F(o)          | 1 | 6 | 0.248268 | 1.39955154 |
| GO | negative regulation of G-protein coupled receptor protein signaling p:  | 1 | 6 | 0.248268 | 1.39955154 |
| GO | histone mRNA 3'-end processing                                          | 1 | 6 | 0.248268 | 1.39955154 |
| GO | exocytic vesicle                                                        | 1 | 6 | 0.248268 | 1.39955154 |
| GO | neurexin binding                                                        | 1 | 6 | 0.248268 | 1.39955154 |
| GO | drug transmembrane transporter activity                                 | 1 | 6 | 0.248268 | 1.39955154 |
| GO | alpha DNA polymerase:primase complex                                    | 1 | 6 | 0.248268 | 1.39955154 |
| GO | phospholipid homeostasis                                                | 1 | 6 | 0.248268 | 1.39955154 |
| GO | response to fructose stimulus                                           | 1 | 6 | 0.248268 | 1.39955154 |
| GO | apical cortex                                                           | 1 | 6 | 0.248268 | 1.39955154 |
| GO | negative regulation of survival gene product expression                 | 1 | 6 | 0.248268 | 1.39955154 |
| GO | nuclear envelope lumen                                                  | 1 | 6 | 0.248268 | 1.39955154 |
| GO | vitamin A metabolic process                                             | 1 | 6 | 0.248268 | 1.39955154 |
| GO | transition metal ion binding                                            | 1 | 6 | 0.248268 | 1.39955154 |
| GO | lymphocyte chemotaxis                                                   | 1 | 6 | 0.248268 | 1.39955154 |
| GO | prostate epithelial cord arborization involved in prostate glandular ac | 1 | 6 | 0.248268 | 1.39955154 |
| GO | regulation of branching involved in prostate gland morphogenesis        | 1 | 6 | 0.248268 | 1.39955154 |
| GO | protein insertion into membrane                                         | 1 | 6 | 0.248268 | 1.39955154 |
| GO | positive regulation of BMP signaling pathway                            | 1 | 6 | 0.248268 | 1.39955154 |
| GO | tongue development                                                      | 1 | 6 | 0.248268 | 1.39955154 |
| GO | exocrine pancreas development                                           | 1 | 6 | 0.248268 | 1.39955154 |
| GO | chromo shadow domain binding                                            | 1 | 6 | 0.248268 | 1.39955154 |
| GO | erythrocyte development                                                 | 1 | 6 | 0.248268 | 1.39955154 |
| GO | SMAD protein nuclear translocation                                      | 1 | 6 | 0.248268 | 1.39955154 |
| GO | gamma-tubulin ring complex                                              | 1 | 6 | 0.248268 | 1.39955154 |
| GO | G-protein coupled photoreceptor activity                                | 1 | 6 | 0.248268 | 1.39955154 |
| GO | cardiac muscle tissue morphogenesis                                     | 1 | 6 | 0.248268 | 1.39955154 |
| GO | response to manganese ion                                               | 1 | 6 | 0.248268 | 1.39955154 |
| GO | cell motility                                                           | 1 | 6 | 0.248268 | 1.39955154 |
| GO | germ cell migration                                                     | 1 | 6 | 0.248268 | 1.39955154 |
| GO | store-operated calcium channel activity                                 | 1 | 6 | 0.248268 | 1.39955154 |
| GO | sex determination                                                       | 1 | 6 | 0.248268 | 1.39955154 |
| GO | spinal cord motor neuron differentiation                                | 1 | 6 | 0.248268 | 1.39955154 |

|                                                               |    |      |          |            |
|---------------------------------------------------------------|----|------|----------|------------|
| GO DNA packaging                                              | 1  | 6    | 0.248268 | 1.39955154 |
| GO epithelial cell development                                | 1  | 6    | 0.248268 | 1.39955154 |
| GO prostate gland development                                 | 1  | 6    | 0.248268 | 1.39955154 |
| GO proline biosynthetic process                               | 1  | 6    | 0.248268 | 1.39955154 |
| GO response to glucagon stimulus                              | 1  | 6    | 0.248268 | 1.39955154 |
| GO glycoprotein biosynthetic process                          | 1  | 6    | 0.248268 | 1.39955154 |
| GO Notch receptor processing                                  | 1  | 6    | 0.248268 | 1.39955154 |
| GO bicarbonate transport                                      | 1  | 6    | 0.248268 | 1.39955154 |
| GO response to toxin                                          | 4  | 55   | 0.251586 | 0.92760081 |
| GO post-embryonic development                                 | 4  | 55   | 0.251586 | 0.92760081 |
| GO ossification                                               | 4  | 55   | 0.251586 | 0.92760081 |
| GO transforming growth factor beta receptor signaling pathway | 4  | 55   | 0.251586 | 0.92760081 |
| GO signal transducer activity                                 | 16 | 285  | 0.252492 | 0.78381133 |
| GO calcium-dependent phospholipid binding                     | 2  | 21   | 0.254852 | 1.06311557 |
| GO ventricular cardiac muscle tissue morphogenesis            | 2  | 21   | 0.254852 | 1.06311557 |
| GO Wnt receptor signaling pathway, calcium modulating pathway | 2  | 21   | 0.254852 | 1.06311557 |
| GO transferase activity, transferring glycosyl groups         | 9  | 149  | 0.256588 | 0.81289118 |
| GO response to mechanical stimulus                            | 3  | 38   | 0.258339 | 0.95306527 |
| GO antiporter activity                                        | 3  | 38   | 0.258339 | 0.95306527 |
| GO protein amino acid phosphorylation                         | 26 | 488  | 0.261953 | 0.72693669 |
| GO GTP binding                                                | 19 | 347  | 0.26197  | 0.74255574 |
| GO transferase activity                                       | 57 | 1127 | 0.267896 | 0.67989273 |
| GO ion channel activity                                       | 9  | 151  | 0.268915 | 0.77147064 |
| GO potassium ion transport                                    | 9  | 151  | 0.268915 | 0.77147064 |
| GO epithelial cell differentiation                            | 3  | 39   | 0.271061 | 0.90541751 |
| GO intracellular protein kinase cascade                       | 6  | 94   | 0.271419 | 0.80299775 |
| GO muscle organ development                                   | 6  | 94   | 0.271419 | 0.80299775 |
| GO endonuclease activity                                      | 4  | 57   | 0.272275 | 0.85268072 |
| GO response to glucose stimulus                               | 4  | 57   | 0.272275 | 0.85268072 |
| GO regulation of cell growth                                  | 4  | 57   | 0.272275 | 0.85268072 |
| GO liver development                                          | 4  | 57   | 0.272275 | 0.85268072 |
| GO placenta development                                       | 2  | 22   | 0.27236  | 0.99162246 |
| GO germ cell development                                      | 2  | 22   | 0.27236  | 0.99162246 |
| GO microvillus                                                | 2  | 22   | 0.27236  | 0.99162246 |
| GO purinergic nucleotide receptor activity, G-protein coupled | 2  | 22   | 0.27236  | 0.99162246 |
| GO voltage-gated calcium channel complex                      | 2  | 22   | 0.27236  | 0.99162246 |
| GO basal plasma membrane                                      | 2  | 22   | 0.27236  | 0.99162246 |
| GO cysteine-type peptidase activity                           | 5  | 76   | 0.277783 | 0.80303239 |
| GO ribosome                                                   | 10 | 172  | 0.278265 | 0.73223424 |
| GO regulation of apoptosis                                    | 7  | 114  | 0.27903  | 0.76130658 |
| GO ribonucleoprotein complex                                  | 6  | 95   | 0.279429 | 0.7760826  |
| GO regulation of cell shape                                   | 4  | 58   | 0.282727 | 0.81629849 |
| GO meiosis                                                    | 4  | 58   | 0.282727 | 0.81629849 |
| GO growth cone                                                | 4  | 58   | 0.282727 | 0.81629849 |
| GO alpha-catenin binding                                      | 1  | 7    | 0.283192 | 1.21234006 |
| GO proteasome binding                                         | 1  | 7    | 0.283192 | 1.21234006 |
| GO labyrinthine layer development                             | 1  | 7    | 0.283192 | 1.21234006 |
| GO cyclosporin A binding                                      | 1  | 7    | 0.283192 | 1.21234006 |
| GO snoRNA binding                                             | 1  | 7    | 0.283192 | 1.21234006 |

|    |                                                                |   |   |          |            |
|----|----------------------------------------------------------------|---|---|----------|------------|
| GO | DNA-directed RNA polymerase III complex                        | 1 | 7 | 0.283192 | 1.21234006 |
| GO | nucleolar ribonuclease P complex                               | 1 | 7 | 0.283192 | 1.21234006 |
| GO | regulation of Cdc42 GTPase activity                            | 1 | 7 | 0.283192 | 1.21234006 |
| GO | cyclin-dependent protein kinase regulator activity             | 1 | 7 | 0.283192 | 1.21234006 |
| GO | fibril organization                                            | 1 | 7 | 0.283192 | 1.21234006 |
| GO | wound healing, spreading of epidermal cells                    | 1 | 7 | 0.283192 | 1.21234006 |
| GO | axon regeneration                                              | 1 | 7 | 0.283192 | 1.21234006 |
| GO | brain morphogenesis                                            | 1 | 7 | 0.283192 | 1.21234006 |
| GO | pyrimidine nucleotide biosynthetic process                     | 1 | 7 | 0.283192 | 1.21234006 |
| GO | steroid hydroxylase activity                                   | 1 | 7 | 0.283192 | 1.21234006 |
| GO | morphogenesis of an epithelial sheet                           | 1 | 7 | 0.283192 | 1.21234006 |
| GO | bile acid:sodium symporter activity                            | 1 | 7 | 0.283192 | 1.21234006 |
| GO | spectrin binding                                               | 1 | 7 | 0.283192 | 1.21234006 |
| GO | death                                                          | 1 | 7 | 0.283192 | 1.21234006 |
| GO | mitotic anaphase                                               | 1 | 7 | 0.283192 | 1.21234006 |
| GO | NAD biosynthetic process                                       | 1 | 7 | 0.283192 | 1.21234006 |
| GO | Ras guanyl-nucleotide exchange factor activity                 | 1 | 7 | 0.283192 | 1.21234006 |
| GO | cellular homeostasis                                           | 1 | 7 | 0.283192 | 1.21234006 |
| GO | response to mercury ion                                        | 1 | 7 | 0.283192 | 1.21234006 |
| GO | BBSome                                                         | 1 | 7 | 0.283192 | 1.21234006 |
| GO | synaptic vesicle exocytosis                                    | 1 | 7 | 0.283192 | 1.21234006 |
| GO | response to selenium ion                                       | 1 | 7 | 0.283192 | 1.21234006 |
| GO | kainate selective glutamate receptor activity                  | 1 | 7 | 0.283192 | 1.21234006 |
| GO | regulation of JNK cascade                                      | 1 | 7 | 0.283192 | 1.21234006 |
| GO | glutamate binding                                              | 1 | 7 | 0.283192 | 1.21234006 |
| GO | neurotransmitter binding                                       | 1 | 7 | 0.283192 | 1.21234006 |
| GO | 3-hydroxyacyl-CoA dehydrogenase activity                       | 1 | 7 | 0.283192 | 1.21234006 |
| GO | cellular zinc ion homeostasis                                  | 1 | 7 | 0.283192 | 1.21234006 |
| GO | central nervous system neuron development                      | 1 | 7 | 0.283192 | 1.21234006 |
| GO | fatty acid catabolic process                                   | 1 | 7 | 0.283192 | 1.21234006 |
| GO | urogenital system development                                  | 1 | 7 | 0.283192 | 1.21234006 |
| GO | cell chemotaxis                                                | 1 | 7 | 0.283192 | 1.21234006 |
| GO | oxidative phosphorylation                                      | 1 | 7 | 0.283192 | 1.21234006 |
| GO | unconventional myosin complex                                  | 1 | 7 | 0.283192 | 1.21234006 |
| GO | protein targeting to lysosome                                  | 1 | 7 | 0.283192 | 1.21234006 |
| GO | regulation of cell-matrix adhesion                             | 1 | 7 | 0.283192 | 1.21234006 |
| GO | monovalent inorganic cation transmembrane transporter activity | 1 | 7 | 0.283192 | 1.21234006 |
| GO | ankyrin binding                                                | 1 | 7 | 0.283192 | 1.21234006 |
| GO | maternal behavior                                              | 1 | 7 | 0.283192 | 1.21234006 |
| GO | positive regulation of synaptic transmission, glutamatergic    | 1 | 7 | 0.283192 | 1.21234006 |
| GO | extracellular ATP-gated cation channel activity                | 1 | 7 | 0.283192 | 1.21234006 |
| GO | purinergic nucleotide receptor activity                        | 1 | 7 | 0.283192 | 1.21234006 |
| GO | regulation of vasodilation                                     | 1 | 7 | 0.283192 | 1.21234006 |
| GO | cellular response to lipopolysaccharide                        | 1 | 7 | 0.283192 | 1.21234006 |
| GO | peptide biosynthetic process                                   | 1 | 7 | 0.283192 | 1.21234006 |
| GO | extrinsic to plasma membrane                                   | 1 | 7 | 0.283192 | 1.21234006 |
| GO | negative regulation of catalytic activity                      | 1 | 7 | 0.283192 | 1.21234006 |
| GO | fructose-2,6-bisphosphate 2-phosphatase activity               | 1 | 7 | 0.283192 | 1.21234006 |
| GO | regulation of protein homodimerization activity                | 1 | 7 | 0.283192 | 1.21234006 |

|    |                                                                      |    |      |          |            |
|----|----------------------------------------------------------------------|----|------|----------|------------|
| GO | GTP-Rho binding                                                      | 1  | 7    | 0.283192 | 1.21234006 |
| GO | positive regulation of alpha-beta T cell proliferation               | 1  | 7    | 0.283192 | 1.21234006 |
| GO | pronucleus                                                           | 1  | 7    | 0.283192 | 1.21234006 |
| GO | organic cation transmembrane transporter activity                    | 1  | 7    | 0.283192 | 1.21234006 |
| GO | U7 snRNP                                                             | 1  | 7    | 0.283192 | 1.21234006 |
| GO | adenohypophysis development                                          | 1  | 7    | 0.283192 | 1.21234006 |
| GO | negative regulation of bone mineralization                           | 1  | 7    | 0.283192 | 1.21234006 |
| GO | negative regulation of myoblast differentiation                      | 1  | 7    | 0.283192 | 1.21234006 |
| GO | BRCA1-A complex                                                      | 1  | 7    | 0.283192 | 1.21234006 |
| GO | transmembrane receptor protein serine/threonine kinase activity      | 1  | 7    | 0.283192 | 1.21234006 |
| GO | type II transforming growth factor beta receptor binding             | 1  | 7    | 0.283192 | 1.21234006 |
| GO | contractile fiber                                                    | 1  | 7    | 0.283192 | 1.21234006 |
| GO | coenzyme A biosynthetic process                                      | 1  | 7    | 0.283192 | 1.21234006 |
| GO | filopodium membrane                                                  | 1  | 7    | 0.283192 | 1.21234006 |
| GO | semaphorin receptor activity                                         | 1  | 7    | 0.283192 | 1.21234006 |
| GO | male gonad development                                               | 3  | 40   | 0.283849 | 0.85912135 |
| GO | non-membrane spanning protein tyrosine kinase activity               | 3  | 40   | 0.283849 | 0.85912135 |
| GO | dendritic spine                                                      | 3  | 40   | 0.283849 | 0.85912135 |
| GO | brain development                                                    | 7  | 115  | 0.286356 | 0.73736769 |
| GO | condensed nuclear chromosome                                         | 2  | 23   | 0.28985  | 0.92380727 |
| GO | neuromuscular process controlling balance                            | 2  | 23   | 0.28985  | 0.92380727 |
| GO | positive regulation of cAMP biosynthetic process                     | 2  | 23   | 0.28985  | 0.92380727 |
| GO | chromosome, telomeric region                                         | 2  | 23   | 0.28985  | 0.92380727 |
| GO | regulation of ARF GTPase activity                                    | 2  | 23   | 0.28985  | 0.92380727 |
| GO | positive regulation of osteoblast differentiation                    | 2  | 23   | 0.28985  | 0.92380727 |
| GO | Wnt receptor signaling pathway through beta-catenin                  | 2  | 23   | 0.28985  | 0.92380727 |
| GO | thymus development                                                   | 2  | 23   | 0.28985  | 0.92380727 |
| GO | cytoplasmic mRNA processing body                                     | 2  | 23   | 0.28985  | 0.92380727 |
| GO | negative regulation of protein kinase activity                       | 3  | 41   | 0.296685 | 0.81409928 |
| GO | positive regulation of transcription from RNA polymerase II promoter | 16 | 295  | 0.297306 | 0.64111953 |
| GO | GTPase activator activity                                            | 9  | 156  | 0.300458 | 0.67039701 |
| GO | chromatin binding                                                    | 9  | 156  | 0.300458 | 0.67039701 |
| GO | hormone activity                                                     | 5  | 79   | 0.305075 | 0.71305694 |
| GO | extracellular region                                                 | 85 | 1730 | 0.305439 | 0.55764056 |
| GO | learning                                                             | 2  | 24   | 0.307288 | 0.85930444 |
| GO | visual learning                                                      | 2  | 24   | 0.307288 | 0.85930444 |
| GO | ARF GTPase activator activity                                        | 2  | 24   | 0.307288 | 0.85930444 |
| GO | cellular iron ion homeostasis                                        | 2  | 24   | 0.307288 | 0.85930444 |
| GO | lung alveolus development                                            | 2  | 24   | 0.307288 | 0.85930444 |
| GO | regulation of protein metabolic process                              | 3  | 42   | 0.309554 | 0.77028008 |
| GO | cell growth                                                          | 3  | 42   | 0.309554 | 0.77028008 |
| GO | RNA processing                                                       | 5  | 80   | 0.314263 | 0.68387942 |
| GO | basement membrane                                                    | 4  | 61   | 0.3144   | 0.71113112 |
| GO | cytoplasmic vesicle membrane                                         | 4  | 61   | 0.3144   | 0.71113112 |
| GO | cytoskeleton organization                                            | 4  | 61   | 0.3144   | 0.71113112 |
| GO | response to estradiol stimulus                                       | 4  | 61   | 0.3144   | 0.71113112 |
| GO | catenin complex                                                      | 1  | 8    | 0.316495 | 1.05602928 |
| GO | positive regulation of dendrite morphogenesis                        | 1  | 8    | 0.316495 | 1.05602928 |
| GO | response to carbohydrate stimulus                                    | 1  | 8    | 0.316495 | 1.05602928 |



|    |                                                                        |   |   |          |            |
|----|------------------------------------------------------------------------|---|---|----------|------------|
| GO | protein K63-linked deubiquitination                                    | 1 | 8 | 0.316495 | 1.05602928 |
| GO | cyclin binding                                                         | 1 | 8 | 0.316495 | 1.05602928 |
| GO | cyclin-dependent protein kinase holoenzyme complex                     | 1 | 8 | 0.316495 | 1.05602928 |
| GO | poly(A) RNA binding                                                    | 1 | 8 | 0.316495 | 1.05602928 |
| GO | negative regulation of neurogenesis                                    | 1 | 8 | 0.316495 | 1.05602928 |
| GO | prepulse inhibition                                                    | 1 | 8 | 0.316495 | 1.05602928 |
| GO | hydrogen peroxide biosynthetic process                                 | 1 | 8 | 0.316495 | 1.05602928 |
| GO | olfactory bulb development                                             | 1 | 8 | 0.316495 | 1.05602928 |
| GO | secondary active sulfate transmembrane transporter activity            | 1 | 8 | 0.316495 | 1.05602928 |
| GO | adenylate kinase activity                                              | 1 | 8 | 0.316495 | 1.05602928 |
| GO | ephrin receptor binding                                                | 1 | 8 | 0.316495 | 1.05602928 |
| GO | positive regulation of JAK-STAT cascade                                | 1 | 8 | 0.316495 | 1.05602928 |
| GO | positive regulation of leukocyte chemotaxis                            | 1 | 8 | 0.316495 | 1.05602928 |
| GO | retinal metabolic process                                              | 1 | 8 | 0.316495 | 1.05602928 |
| GO | calcium channel complex                                                | 1 | 8 | 0.316495 | 1.05602928 |
| GO | FK506 binding                                                          | 1 | 8 | 0.316495 | 1.05602928 |
| GO | vascular endothelial growth factor receptor activity                   | 1 | 8 | 0.316495 | 1.05602928 |
| GO | protein homotrimerization                                              | 1 | 8 | 0.316495 | 1.05602928 |
| GO | diacylglycerol binding                                                 | 1 | 8 | 0.316495 | 1.05602928 |
| GO | creatine metabolic process                                             | 1 | 8 | 0.316495 | 1.05602928 |
| GO | glycine catabolic process                                              | 1 | 8 | 0.316495 | 1.05602928 |
| GO | dopamine receptor signaling pathway                                    | 1 | 8 | 0.316495 | 1.05602928 |
| GO | N-methyl-D-aspartate selective glutamate receptor complex              | 1 | 8 | 0.316495 | 1.05602928 |
| GO | positive regulation of G-protein coupled receptor protein signaling pa | 1 | 8 | 0.316495 | 1.05602928 |
| GO | positive regulation of chondrocyte differentiation                     | 1 | 8 | 0.316495 | 1.05602928 |
| GO | phosphatidylcholine binding                                            | 1 | 8 | 0.316495 | 1.05602928 |
| GO | phospholipase inhibitor activity                                       | 1 | 8 | 0.316495 | 1.05602928 |
| GO | negative regulation of programmed cell death                           | 1 | 8 | 0.316495 | 1.05602928 |
| GO | antioxidant activity                                                   | 1 | 8 | 0.316495 | 1.05602928 |
| GO | positive regulation of cholesterol efflux                              | 1 | 8 | 0.316495 | 1.05602928 |
| GO | protein-DNA complex                                                    | 1 | 8 | 0.316495 | 1.05602928 |
| GO | ciliary rootlet                                                        | 1 | 8 | 0.316495 | 1.05602928 |
| GO | energy reserve metabolic process                                       | 1 | 8 | 0.316495 | 1.05602928 |
| GO | response to UV-B                                                       | 1 | 8 | 0.316495 | 1.05602928 |
| GO | actin-dependent ATPase activity                                        | 1 | 8 | 0.316495 | 1.05602928 |
| GO | phosphoinositide 3-kinase cascade                                      | 1 | 8 | 0.316495 | 1.05602928 |
| GO | hydrogen-exporting ATPase activity, phosphorylative mechanism          | 1 | 8 | 0.316495 | 1.05602928 |
| GO | proton-transporting V-type ATPase, V1 domain                           | 1 | 8 | 0.316495 | 1.05602928 |
| GO | embryonic hemopoiesis                                                  | 1 | 8 | 0.316495 | 1.05602928 |
| GO | positive regulation of NF-kappaB import into nucleus                   | 1 | 8 | 0.316495 | 1.05602928 |
| GO | activation of caspase activity by cytochrome c                         | 1 | 8 | 0.316495 | 1.05602928 |
| GO | retinoid binding                                                       | 1 | 8 | 0.316495 | 1.05602928 |
| GO | heterochromatin                                                        | 1 | 8 | 0.316495 | 1.05602928 |
| GO | regulation of ossification                                             | 1 | 8 | 0.316495 | 1.05602928 |
| GO | regulation of sodium ion transport                                     | 1 | 8 | 0.316495 | 1.05602928 |
| GO | organic cation transport                                               | 1 | 8 | 0.316495 | 1.05602928 |
| GO | negative chemotaxis                                                    | 1 | 8 | 0.316495 | 1.05602928 |
| GO | transmembrane receptor protein serine/threonine kinase signaling pa    | 1 | 8 | 0.316495 | 1.05602928 |
| GO | positive regulation of neuroblast proliferation                        | 1 | 8 | 0.316495 | 1.05602928 |

|                                                                             |    |     |          |            |
|-----------------------------------------------------------------------------|----|-----|----------|------------|
| GO embryonic viscerocranium morphogenesis                                   | 1  | 8   | 0.316495 | 1.05602928 |
| GO positive regulation of SMAD protein nuclear translocation                | 1  | 8   | 0.316495 | 1.05602928 |
| GO troponin complex                                                         | 1  | 8   | 0.316495 | 1.05602928 |
| GO sarcomere organization                                                   | 1  | 8   | 0.316495 | 1.05602928 |
| GO cytosolic calcium ion homeostasis                                        | 1  | 8   | 0.316495 | 1.05602928 |
| GO histone H2B ubiquitination                                               | 1  | 8   | 0.316495 | 1.05602928 |
| GO C2H2 zinc finger domain binding                                          | 1  | 8   | 0.316495 | 1.05602928 |
| GO mesonephros development                                                  | 1  | 8   | 0.316495 | 1.05602928 |
| GO regulation of calcium ion-dependent exocytosis                           | 1  | 8   | 0.316495 | 1.05602928 |
| GO epithelial cell proliferation                                            | 1  | 8   | 0.316495 | 1.05602928 |
| GO positive regulation of fat cell differentiation                          | 1  | 8   | 0.316495 | 1.05602928 |
| GO L-glutamate transport                                                    | 1  | 8   | 0.316495 | 1.05602928 |
| GO tail morphogenesis                                                       | 1  | 8   | 0.316495 | 1.05602928 |
| GO glycosphingolipid biosynthetic process                                   | 1  | 8   | 0.316495 | 1.05602928 |
| GO clathrin binding                                                         | 1  | 8   | 0.316495 | 1.05602928 |
| GO HAUS complex                                                             | 1  | 8   | 0.316495 | 1.05602928 |
| GO bile acid biosynthetic process                                           | 1  | 8   | 0.316495 | 1.05602928 |
| GO induction of apoptosis by oxidative stress                               | 1  | 8   | 0.316495 | 1.05602928 |
| GO protein folding                                                          | 8  | 139 | 0.318496 | 0.62475092 |
| GO ion transport                                                            | 26 | 505 | 0.321611 | 0.54571283 |
| GO Notch signaling pathway                                                  | 3  | 43  | 0.32244  | 0.72759821 |
| GO glucose metabolic process                                                | 3  | 43  | 0.32244  | 0.72759821 |
| GO protein polyubiquitination                                               | 2  | 25  | 0.324639 | 0.79779879 |
| GO spindle microtubule                                                      | 2  | 25  | 0.324639 | 0.79779879 |
| GO glycoprotein binding                                                     | 2  | 25  | 0.324639 | 0.79779879 |
| GO filopodium                                                               | 2  | 25  | 0.324639 | 0.79779879 |
| GO mitochondrial intermembrane space                                        | 2  | 25  | 0.324639 | 0.79779879 |
| GO protein targeting to mitochondrion                                       | 2  | 25  | 0.324639 | 0.79779879 |
| GO thyroid hormone receptor binding                                         | 2  | 25  | 0.324639 | 0.79779879 |
| GO skeletal system morphogenesis                                            | 2  | 25  | 0.324639 | 0.79779879 |
| GO spliceosomal snRNP assembly                                              | 2  | 25  | 0.324639 | 0.79779879 |
| GO negative regulation of ubiquitin-protein ligase activity involved in mit | 4  | 62  | 0.325032 | 0.67731844 |
| GO integrin binding                                                         | 4  | 62  | 0.325032 | 0.67731844 |
| GO positive regulation of cell migration                                    | 4  | 62  | 0.325032 | 0.67731844 |
| GO protein complex assembly                                                 | 6  | 101 | 0.328457 | 0.62069077 |
| GO cellular_component                                                       | 27 | 528 | 0.330143 | 0.51972548 |
| GO ligase activity                                                          | 16 | 303 | 0.334766 | 0.53049092 |
| GO protein binding, bridging                                                | 3  | 44  | 0.335327 | 0.68599317 |
| GO Rab GTPase activator activity                                            | 3  | 44  | 0.335327 | 0.68599317 |
| GO regulation of Rab GTPase activity                                        | 3  | 44  | 0.335327 | 0.68599317 |
| GO anaphase-promoting complex-dependent proteasomal ubiquitin-depr          | 4  | 63  | 0.335686 | 0.64408903 |
| GO voltage-gated potassium channel activity                                 | 4  | 63  | 0.335686 | 0.64408903 |
| GO metalloendopeptidase activity                                            | 6  | 102 | 0.336748 | 0.59574689 |
| GO positive regulation of transcription, DNA-dependent                      | 7  | 122 | 0.338718 | 0.57572252 |
| GO integral to plasma membrane                                              | 48 | 969 | 0.341214 | 0.46957629 |
| GO skin development                                                         | 2  | 26  | 0.341874 | 0.73901688 |
| GO terminal button                                                          | 2  | 26  | 0.341874 | 0.73901688 |
| GO unfolded protein binding                                                 | 6  | 103 | 0.345063 | 0.57105947 |
| GO membrane raft                                                            | 6  | 103 | 0.345063 | 0.57105947 |

|    |                                                                           |   |     |          |            |
|----|---------------------------------------------------------------------------|---|-----|----------|------------|
| GO | endocytosis                                                               | 6 | 103 | 0.345063 | 0.57105947 |
| GO | cell death                                                                | 7 | 123 | 0.346313 | 0.55342923 |
| GO | motor activity                                                            | 4 | 64  | 0.346354 | 0.61142175 |
| GO | glucose homeostasis                                                       | 3 | 45  | 0.348201 | 0.64540907 |
| GO | blood vessel morphogenesis                                                | 1 | 9   | 0.348252 | 0.9220806  |
| GO | fascia adherens                                                           | 1 | 9   | 0.348252 | 0.9220806  |
| GO | myeloid dendritic cell differentiation                                    | 1 | 9   | 0.348252 | 0.9220806  |
| GO | phospholipase binding                                                     | 1 | 9   | 0.348252 | 0.9220806  |
| GO | vinculin binding                                                          | 1 | 9   | 0.348252 | 0.9220806  |
| GO | ribonuclease P activity                                                   | 1 | 9   | 0.348252 | 0.9220806  |
| GO | regulation of alternative nuclear mRNA splicing, via spliceosome          | 1 | 9   | 0.348252 | 0.9220806  |
| GO | response to food                                                          | 1 | 9   | 0.348252 | 0.9220806  |
| GO | outer kinetochore of condensed chromosome                                 | 1 | 9   | 0.348252 | 0.9220806  |
| GO | UV protection                                                             | 1 | 9   | 0.348252 | 0.9220806  |
| GO | ubiquinone biosynthetic process                                           | 1 | 9   | 0.348252 | 0.9220806  |
| GO | associative learning                                                      | 1 | 9   | 0.348252 | 0.9220806  |
| GO | dendrite cytoplasm                                                        | 1 | 9   | 0.348252 | 0.9220806  |
| GO | holo TFIID complex                                                        | 1 | 9   | 0.348252 | 0.9220806  |
| GO | prostaglandin metabolic process                                           | 1 | 9   | 0.348252 | 0.9220806  |
| GO | negative regulation of blood vessel endothelial cell migration            | 1 | 9   | 0.348252 | 0.9220806  |
| GO | positive regulation of membrane protein ectodomain proteolysis            | 1 | 9   | 0.348252 | 0.9220806  |
| GO | positive regulation of nitric-oxide synthase activity                     | 1 | 9   | 0.348252 | 0.9220806  |
| GO | regulation of gene-specific transcription from RNA polymerase II promoter | 1 | 9   | 0.348252 | 0.9220806  |
| GO | two-component signal transduction system (phosphorelay)                   | 1 | 9   | 0.348252 | 0.9220806  |
| GO | organelle organization                                                    | 1 | 9   | 0.348252 | 0.9220806  |
| GO | adult feeding behavior                                                    | 1 | 9   | 0.348252 | 0.9220806  |
| GO | ovulation from ovarian follicle                                           | 1 | 9   | 0.348252 | 0.9220806  |
| GO | anterior/posterior axis specification                                     | 1 | 9   | 0.348252 | 0.9220806  |
| GO | Hsp90 protein binding                                                     | 1 | 9   | 0.348252 | 0.9220806  |
| GO | regulation of protein catabolic process                                   | 1 | 9   | 0.348252 | 0.9220806  |
| GO | synaptonemal complex                                                      | 1 | 9   | 0.348252 | 0.9220806  |
| GO | macrophage differentiation                                                | 1 | 9   | 0.348252 | 0.9220806  |
| GO | axonal fasciculation                                                      | 1 | 9   | 0.348252 | 0.9220806  |
| GO | Nup107-160 complex                                                        | 1 | 9   | 0.348252 | 0.9220806  |
| GO | sleep                                                                     | 1 | 9   | 0.348252 | 0.9220806  |
| GO | telencephalon development                                                 | 1 | 9   | 0.348252 | 0.9220806  |
| GO | positive regulation of receptor-mediated endocytosis                      | 1 | 9   | 0.348252 | 0.9220806  |
| GO | vacuolar proton-transporting V-type ATPase complex                        | 1 | 9   | 0.348252 | 0.9220806  |
| GO | phosphoinositide metabolic process                                        | 1 | 9   | 0.348252 | 0.9220806  |
| GO | respiratory burst                                                         | 1 | 9   | 0.348252 | 0.9220806  |
| GO | triglyceride biosynthetic process                                         | 1 | 9   | 0.348252 | 0.9220806  |
| GO | male meiosis I                                                            | 1 | 9   | 0.348252 | 0.9220806  |
| GO | gonad development                                                         | 1 | 9   | 0.348252 | 0.9220806  |
| GO | proteoglycan biosynthetic process                                         | 1 | 9   | 0.348252 | 0.9220806  |
| GO | sodium:hydrogen antiporter activity                                       | 1 | 9   | 0.348252 | 0.9220806  |
| GO | embryonic organ development                                               | 1 | 9   | 0.348252 | 0.9220806  |
| GO | epithelial tube branching involved in lung morphogenesis                  | 1 | 9   | 0.348252 | 0.9220806  |
| GO | cellular response to reactive oxygen species                              | 1 | 9   | 0.348252 | 0.9220806  |
| GO | positive regulation of ATPase activity                                    | 1 | 9   | 0.348252 | 0.9220806  |

|    |                                                                           |    |      |          |            |
|----|---------------------------------------------------------------------------|----|------|----------|------------|
| GO | positive regulation of release of sequestered calcium ion into cytosol    | 1  | 9    | 0.348252 | 0.9220806  |
| GO | histone monoubiquitination                                                | 1  | 9    | 0.348252 | 0.9220806  |
| GO | actin polymerization or depolymerization                                  | 1  | 9    | 0.348252 | 0.9220806  |
| GO | oligosaccharide metabolic process                                         | 1  | 9    | 0.348252 | 0.9220806  |
| GO | clathrin coat of trans-Golgi network vesicle                              | 1  | 9    | 0.348252 | 0.9220806  |
| GO | skeletal muscle fiber development                                         | 1  | 9    | 0.348252 | 0.9220806  |
| GO | quinone binding                                                           | 1  | 9    | 0.348252 | 0.9220806  |
| GO | melanosome                                                                | 5  | 84   | 0.351306 | 0.5709394  |
| GO | positive regulation of ubiquitin-protein ligase activity involved in mito | 4  | 65   | 0.357028 | 0.57929656 |
| GO | positive regulation of fibroblast proliferation                           | 2  | 27   | 0.358967 | 0.68272004 |
| GO | SH2 domain binding                                                        | 2  | 27   | 0.358967 | 0.68272004 |
| GO | cell-cell adherens junction                                               | 2  | 27   | 0.358967 | 0.68272004 |
| GO | cell aging                                                                | 2  | 27   | 0.358967 | 0.68272004 |
| GO | protein ubiquitination                                                    | 5  | 85   | 0.360611 | 0.54359546 |
| GO | cytoplasmic membrane-bounded vesicle                                      | 5  | 85   | 0.360611 | 0.54359546 |
| GO | early endosome                                                            | 5  | 85   | 0.360611 | 0.54359546 |
| GO | peptidase inhibitor activity                                              | 5  | 85   | 0.360611 | 0.54359546 |
| GO | cytosol                                                                   | 60 | 1230 | 0.363518 | 0.40279803 |
| GO | positive regulation of transcription                                      | 8  | 146  | 0.367676 | 0.48136    |
| GO | structural constituent of ribosome                                        | 8  | 146  | 0.367676 | 0.48136    |
| GO | RNA polymerase II transcription factor activity                           | 7  | 126  | 0.369202 | 0.487667   |
| GO | protein heterooligomerization                                             | 3  | 47   | 0.373858 | 0.56710035 |
| GO | neuron differentiation                                                    | 3  | 47   | 0.373858 | 0.56710035 |
| GO | voltage-gated ion channel activity                                        | 8  | 147  | 0.374769 | 0.46145989 |
| GO | negative regulation of angiogenesis                                       | 2  | 28   | 0.375894 | 0.62869885 |
| GO | positive regulation of DNA replication                                    | 2  | 28   | 0.375894 | 0.62869885 |
| GO | memory                                                                    | 2  | 28   | 0.375894 | 0.62869885 |
| GO | activation of phospholipase C activity by G-protein coupled receptor p    | 2  | 28   | 0.375894 | 0.62869885 |
| GO | sensory perception of pain                                                | 2  | 28   | 0.375894 | 0.62869885 |
| GO | axon                                                                      | 7  | 127  | 0.376855 | 0.46610757 |
| GO | cardiac muscle tissue development                                         | 1  | 10   | 0.378536 | 0.80497995 |
| GO | regulation of actin cytoskeleton organization                             | 1  | 10   | 0.378536 | 0.80497995 |
| GO | ribonucleoprotein binding                                                 | 1  | 10   | 0.378536 | 0.80497995 |
| GO | acetylcholine binding                                                     | 1  | 10   | 0.378536 | 0.80497995 |
| GO | oxygen transporter activity                                               | 1  | 10   | 0.378536 | 0.80497995 |
| GO | oxygen transport                                                          | 1  | 10   | 0.378536 | 0.80497995 |
| GO | transcription elongation regulator activity                               | 1  | 10   | 0.378536 | 0.80497995 |
| GO | hormone biosynthetic process                                              | 1  | 10   | 0.378536 | 0.80497995 |
| GO | cytoplasmic dynein complex                                                | 1  | 10   | 0.378536 | 0.80497995 |
| GO | regulation of gene expression by genetic imprinting                       | 1  | 10   | 0.378536 | 0.80497995 |
| GO | ATP metabolic process                                                     | 1  | 10   | 0.378536 | 0.80497995 |
| GO | elevation of cytosolic calcium ion concentration involved in G-protein    | 1  | 10   | 0.378536 | 0.80497995 |
| GO | positive regulation of collagen biosynthetic process                      | 1  | 10   | 0.378536 | 0.80497995 |
| GO | positive regulation of positive chemotaxis                                | 1  | 10   | 0.378536 | 0.80497995 |
| GO | NAD metabolic process                                                     | 1  | 10   | 0.378536 | 0.80497995 |
| GO | fatty acid transport                                                      | 1  | 10   | 0.378536 | 0.80497995 |
| GO | cilium membrane                                                           | 1  | 10   | 0.378536 | 0.80497995 |
| GO | osteoblast development                                                    | 1  | 10   | 0.378536 | 0.80497995 |
| GO | glutathione peroxidase activity                                           | 1  | 10   | 0.378536 | 0.80497995 |

|    |                                                          |    |     |          |            |
|----|----------------------------------------------------------|----|-----|----------|------------|
| GO | outer membrane-bounded periplasmic space                 | 1  | 10  | 0.378536 | 0.80497995 |
| GO | Ran GTPase binding                                       | 1  | 10  | 0.378536 | 0.80497995 |
| GO | cholesterol catabolic process                            | 1  | 10  | 0.378536 | 0.80497995 |
| GO | lipoprotein binding                                      | 1  | 10  | 0.378536 | 0.80497995 |
| GO | negative regulation of hormone secretion                 | 1  | 10  | 0.378536 | 0.80497995 |
| GO | small conjugating protein ligase activity                | 1  | 10  | 0.378536 | 0.80497995 |
| GO | phosphoinositide 3-kinase binding                        | 1  | 10  | 0.378536 | 0.80497995 |
| GO | positive regulation of T cell activation                 | 1  | 10  | 0.378536 | 0.80497995 |
| GO | double-strand break repair via nonhomologous end joining | 1  | 10  | 0.378536 | 0.80497995 |
| GO | cognition                                                | 1  | 10  | 0.378536 | 0.80497995 |
| GO | positive regulation of smooth muscle cell migration      | 1  | 10  | 0.378536 | 0.80497995 |
| GO | defense response to Gram-negative bacterium              | 1  | 10  | 0.378536 | 0.80497995 |
| GO | negative regulation of fibrinolysis                      | 1  | 10  | 0.378536 | 0.80497995 |
| GO | positive regulation of interleukin-8 production          | 1  | 10  | 0.378536 | 0.80497995 |
| GO | Golgi lumen                                              | 1  | 10  | 0.378536 | 0.80497995 |
| GO | 3',5'-cyclic-AMP phosphodiesterase activity              | 1  | 10  | 0.378536 | 0.80497995 |
| GO | XY body                                                  | 1  | 10  | 0.378536 | 0.80497995 |
| GO | positive regulation of activated T cell proliferation    | 1  | 10  | 0.378536 | 0.80497995 |
| GO | defense response to fungus                               | 1  | 10  | 0.378536 | 0.80497995 |
| GO | killing of cells of another organism                     | 1  | 10  | 0.378536 | 0.80497995 |
| GO | apoptotic mitochondrial changes                          | 1  | 10  | 0.378536 | 0.80497995 |
| GO | regulation of mitochondrial membrane potential           | 1  | 10  | 0.378536 | 0.80497995 |
| GO | limb development                                         | 1  | 10  | 0.378536 | 0.80497995 |
| GO | macrophage chemotaxis                                    | 1  | 10  | 0.378536 | 0.80497995 |
| GO | positive regulation of epithelial cell migration         | 1  | 10  | 0.378536 | 0.80497995 |
| GO | microtubule plus-end binding                             | 1  | 10  | 0.378536 | 0.80497995 |
| GO | microtubule bundle formation                             | 1  | 10  | 0.378536 | 0.80497995 |
| GO | I band                                                   | 1  | 10  | 0.378536 | 0.80497995 |
| GO | response to iron ion                                     | 1  | 10  | 0.378536 | 0.80497995 |
| GO | I-SMAD binding                                           | 1  | 10  | 0.378536 | 0.80497995 |
| GO | transforming growth factor beta binding                  | 1  | 10  | 0.378536 | 0.80497995 |
| GO | metalloendopeptidase inhibitor activity                  | 1  | 10  | 0.378536 | 0.80497995 |
| GO | Wnt receptor activity                                    | 1  | 10  | 0.378536 | 0.80497995 |
| GO | signalosome                                              | 1  | 10  | 0.378536 | 0.80497995 |
| GO | L-glutamate transmembrane transporter activity           | 1  | 10  | 0.378536 | 0.80497995 |
| GO | G1 phase of mitotic cell cycle                           | 1  | 10  | 0.378536 | 0.80497995 |
| GO | cytokine binding                                         | 1  | 10  | 0.378536 | 0.80497995 |
| GO | prostate gland epithelium morphogenesis                  | 1  | 10  | 0.378536 | 0.80497995 |
| GO | nuclear membrane                                         | 5  | 87  | 0.379235 | 0.48991043 |
| GO | visual perception                                        | 10 | 189 | 0.382424 | 0.42458103 |
| GO | ATPase activity                                          | 7  | 128 | 0.384516 | 0.44472339 |
| GO | serine-type peptidase activity                           | 3  | 48  | 0.386615 | 0.5292831  |
| GO | fatty acid biosynthetic process                          | 3  | 48  | 0.386615 | 0.5292831  |
| GO | cytokine-mediated signaling pathway                      | 3  | 48  | 0.386615 | 0.5292831  |
| GO | positive regulation of apoptosis                         | 6  | 108 | 0.386838 | 0.45127667 |
| GO | mRNA processing                                          | 12 | 231 | 0.3873   | 0.40001445 |
| GO | electron carrier activity                                | 8  | 149 | 0.388978 | 0.42207534 |
| GO | steroid metabolic process                                | 4  | 68  | 0.389002 | 0.48598811 |
| GO | Rho guanyl-nucleotide exchange factor activity           | 4  | 68  | 0.389002 | 0.48598811 |

|    |                                                                        |    |     |          |            |
|----|------------------------------------------------------------------------|----|-----|----------|------------|
| GO | protein kinase C binding                                               | 2  | 29  | 0.392633 | 0.57676865 |
| GO | positive regulation of smooth muscle cell proliferation                | 2  | 29  | 0.392633 | 0.57676865 |
| GO | growth                                                                 | 2  | 29  | 0.392633 | 0.57676865 |
| GO | positive regulation of ERK1 and ERK2 cascade                           | 2  | 29  | 0.392633 | 0.57676865 |
| GO | soluble fraction                                                       | 16 | 315 | 0.392727 | 0.36999101 |
| GO | microtubule                                                            | 12 | 233 | 0.398695 | 0.36922086 |
| GO | phospholipid biosynthetic process                                      | 3  | 49  | 0.39931  | 0.49230086 |
| GO | single-stranded DNA binding                                            | 3  | 49  | 0.39931  | 0.49230086 |
| GO | mRNA transport                                                         | 3  | 49  | 0.39931  | 0.49230086 |
| GO | protein transporter activity                                           | 4  | 69  | 0.399619 | 0.45585043 |
| GO | cell communication                                                     | 5  | 90  | 0.407128 | 0.41176115 |
| GO | spindle                                                                | 5  | 90  | 0.407128 | 0.41176115 |
| GO | gamma-catenin binding                                                  | 1  | 11  | 0.407414 | 0.70097975 |
| GO | positive regulation of axon extension                                  | 1  | 11  | 0.407414 | 0.70097975 |
| GO | mitotic sister chromatid segregation                                   | 1  | 11  | 0.407414 | 0.70097975 |
| GO | cell-cell junction assembly                                            | 1  | 11  | 0.407414 | 0.70097975 |
| GO | cellular response to oxidative stress                                  | 1  | 11  | 0.407414 | 0.70097975 |
| GO | cyclin-dependent protein kinase inhibitor activity                     | 1  | 11  | 0.407414 | 0.70097975 |
| GO | trophectodermal cell differentiation                                   | 1  | 11  | 0.407414 | 0.70097975 |
| GO | estrogen receptor signaling pathway                                    | 1  | 11  | 0.407414 | 0.70097975 |
| GO | positive regulation of neurogenesis                                    | 1  | 11  | 0.407414 | 0.70097975 |
| GO | gap junction channel activity                                          | 1  | 11  | 0.407414 | 0.70097975 |
| GO | response to vitamin A                                                  | 1  | 11  | 0.407414 | 0.70097975 |
| GO | protein tetramerization                                                | 1  | 11  | 0.407414 | 0.70097975 |
| GO | DNA methylation involved in gamete generation                          | 1  | 11  | 0.407414 | 0.70097975 |
| GO | cell fate determination                                                | 1  | 11  | 0.407414 | 0.70097975 |
| GO | pyridine nucleotide biosynthetic process                               | 1  | 11  | 0.407414 | 0.70097975 |
| GO | positive regulation of vascular endothelial growth factor receptor sig | 1  | 11  | 0.407414 | 0.70097975 |
| GO | long-chain fatty acid-CoA ligase activity                              | 1  | 11  | 0.407414 | 0.70097975 |
| GO | positive regulation of neuron projection development                   | 1  | 11  | 0.407414 | 0.70097975 |
| GO | cell recognition                                                       | 1  | 11  | 0.407414 | 0.70097975 |
| GO | Ras GTPase binding                                                     | 1  | 11  | 0.407414 | 0.70097975 |
| GO | morphogenesis of an epithelium                                         | 1  | 11  | 0.407414 | 0.70097975 |
| GO | adenylate cyclase activity                                             | 1  | 11  | 0.407414 | 0.70097975 |
| GO | regulation of synaptic transmission                                    | 1  | 11  | 0.407414 | 0.70097975 |
| GO | RNA polymerase II carboxy-terminal domain kinase activity              | 1  | 11  | 0.407414 | 0.70097975 |
| GO | DNA bending activity                                                   | 1  | 11  | 0.407414 | 0.70097975 |
| GO | low-density lipoprotein receptor binding                               | 1  | 11  | 0.407414 | 0.70097975 |
| GO | positive regulation of erythrocyte differentiation                     | 1  | 11  | 0.407414 | 0.70097975 |
| GO | delayed rectifier potassium channel activity                           | 1  | 11  | 0.407414 | 0.70097975 |
| GO | myoblast fusion                                                        | 1  | 11  | 0.407414 | 0.70097975 |
| GO | motor axon guidance                                                    | 1  | 11  | 0.407414 | 0.70097975 |
| GO | hemidesmosome assembly                                                 | 1  | 11  | 0.407414 | 0.70097975 |
| GO | pericentriolar material                                                | 1  | 11  | 0.407414 | 0.70097975 |
| GO | bile acid metabolic process                                            | 1  | 11  | 0.407414 | 0.70097975 |
| GO | cerebellum development                                                 | 1  | 11  | 0.407414 | 0.70097975 |
| GO | negative regulation of protein ubiquitination                          | 1  | 11  | 0.407414 | 0.70097975 |
| GO | negative regulation of MAPKKK cascade                                  | 1  | 11  | 0.407414 | 0.70097975 |
| GO | gamma-tubulin binding                                                  | 1  | 11  | 0.407414 | 0.70097975 |

|    |                                                                      |    |     |          |            |
|----|----------------------------------------------------------------------|----|-----|----------|------------|
| GO | positive regulation of DNA binding                                   | 1  | 11  | 0.407414 | 0.70097975 |
| GO | positive regulation of calcium ion transport into cytosol            | 1  | 11  | 0.407414 | 0.70097975 |
| GO | endoplasmic reticulum organization                                   | 1  | 11  | 0.407414 | 0.70097975 |
| GO | peptide hormone processing                                           | 1  | 11  | 0.407414 | 0.70097975 |
| GO | protein maturation by peptide bond cleavage                          | 1  | 11  | 0.407414 | 0.70097975 |
| GO | phosphatidylserine binding                                           | 1  | 11  | 0.407414 | 0.70097975 |
| GO | polysaccharide binding                                               | 1  | 11  | 0.407414 | 0.70097975 |
| GO | glucose transmembrane transporter activity                           | 1  | 11  | 0.407414 | 0.70097975 |
| GO | regulation of calcium ion transport                                  | 1  | 11  | 0.407414 | 0.70097975 |
| GO | neural crest cell development                                        | 1  | 11  | 0.407414 | 0.70097975 |
| GO | oligodendrocyte differentiation                                      | 1  | 11  | 0.407414 | 0.70097975 |
| GO | non-G-protein coupled 7TM receptor activity                          | 1  | 11  | 0.407414 | 0.70097975 |
| GO | phospholipase C activity                                             | 1  | 11  | 0.407414 | 0.70097975 |
| GO | peptidase activity                                                   | 23 | 465 | 0.408111 | 0.31323672 |
| GO | DNA-directed DNA polymerase activity                                 | 2  | 30  | 0.409166 | 0.52676581 |
| GO | steroid biosynthetic process                                         | 2  | 30  | 0.409166 | 0.52676581 |
| GO | adult locomotory behavior                                            | 2  | 30  | 0.409166 | 0.52676581 |
| GO | dorsal/ventral pattern formation                                     | 2  | 30  | 0.409166 | 0.52676581 |
| GO | one-carbon metabolic process                                         | 2  | 30  | 0.409166 | 0.52676581 |
| GO | response to ionizing radiation                                       | 2  | 30  | 0.409166 | 0.52676581 |
| GO | negative regulation of transcription factor activity                 | 2  | 30  | 0.409166 | 0.52676581 |
| GO | nuclear speck                                                        | 6  | 111 | 0.411925 | 0.38214759 |
| GO | spindle pole                                                         | 3  | 50  | 0.41193  | 0.45611491 |
| GO | hormone-mediated signaling pathway                                   | 3  | 50  | 0.41193  | 0.45611491 |
| GO | sequence-specific DNA binding                                        | 24 | 487 | 0.411949 | 0.30151781 |
| GO | induction of apoptosis by extracellular signals                      | 5  | 91  | 0.416395 | 0.38631346 |
| GO | protein complex                                                      | 8  | 153 | 0.417432 | 0.34491071 |
| GO | axon guidance                                                        | 4  | 71  | 0.420749 | 0.39692838 |
| GO | response to glucocorticoid stimulus                                  | 4  | 71  | 0.420749 | 0.39692838 |
| GO | hemopoiesis                                                          | 3  | 51  | 0.424466 | 0.42068912 |
| GO | heart morphogenesis                                                  | 2  | 31  | 0.425474 | 0.47854477 |
| GO | ligand-dependent nuclear receptor transcription coactivator activity | 2  | 31  | 0.425474 | 0.47854477 |
| GO | exonuclease activity                                                 | 2  | 31  | 0.425474 | 0.47854477 |
| GO | symporter activity                                                   | 6  | 113 | 0.428596 | 0.33712577 |
| GO | protein homodimerization activity                                    | 18 | 365 | 0.431104 | 0.2632706  |
| GO | translation                                                          | 10 | 197 | 0.432772 | 0.28951567 |
| GO | negative regulation of cyclin-dependent protein kinase activity      | 1  | 12  | 0.434951 | 0.60742787 |
| GO | STAGA complex                                                        | 1  | 12  | 0.434951 | 0.60742787 |
| GO | iron-sulfur cluster binding                                          | 1  | 12  | 0.434951 | 0.60742787 |
| GO | positive regulation of innate immune response                        | 1  | 12  | 0.434951 | 0.60742787 |
| GO | positive regulation of interferon-beta production                    | 1  | 12  | 0.434951 | 0.60742787 |
| GO | regulation of lipid metabolic process                                | 1  | 12  | 0.434951 | 0.60742787 |
| GO | drug metabolic process                                               | 1  | 12  | 0.434951 | 0.60742787 |
| GO | ephrin receptor activity                                             | 1  | 12  | 0.434951 | 0.60742787 |
| GO | positive regulation of calcium ion transport                         | 1  | 12  | 0.434951 | 0.60742787 |
| GO | positive regulation of caspase activity                              | 1  | 12  | 0.434951 | 0.60742787 |
| GO | glutamate signaling pathway                                          | 1  | 12  | 0.434951 | 0.60742787 |
| GO | estradiol 17-beta-dehydrogenase activity                             | 1  | 12  | 0.434951 | 0.60742787 |
| GO | protein methyltransferase activity                                   | 1  | 12  | 0.434951 | 0.60742787 |

|    |                                                                     |    |     |          |            |
|----|---------------------------------------------------------------------|----|-----|----------|------------|
| GO | cholesterol transporter activity                                    | 1  | 12  | 0.434951 | 0.60742787 |
| GO | positive regulation of peptidyl-serine phosphorylation              | 1  | 12  | 0.434951 | 0.60742787 |
| GO | negative regulation of macrophage derived foam cell differentiation | 1  | 12  | 0.434951 | 0.60742787 |
| GO | arylsulfatase activity                                              | 1  | 12  | 0.434951 | 0.60742787 |
| GO | response to pH                                                      | 1  | 12  | 0.434951 | 0.60742787 |
| GO | DNA unwinding involved in replication                               | 1  | 12  | 0.434951 | 0.60742787 |
| GO | positive regulation of blood pressure                               | 1  | 12  | 0.434951 | 0.60742787 |
| GO | dorsal/ventral neural tube patterning                               | 1  | 12  | 0.434951 | 0.60742787 |
| GO | cGMP binding                                                        | 1  | 12  | 0.434951 | 0.60742787 |
| GO | lysosphingolipid and lysophosphatidic acid receptor activity        | 1  | 12  | 0.434951 | 0.60742787 |
| GO | microvillus membrane                                                | 1  | 12  | 0.434951 | 0.60742787 |
| GO | protein serine/threonine phosphatase complex                        | 1  | 12  | 0.434951 | 0.60742787 |
| GO | acrosome reaction                                                   | 1  | 12  | 0.434951 | 0.60742787 |
| GO | immunological synapse                                               | 1  | 12  | 0.434951 | 0.60742787 |
| GO | voltage-gated sodium channel complex                                | 1  | 12  | 0.434951 | 0.60742787 |
| GO | viral genome replication                                            | 1  | 12  | 0.434951 | 0.60742787 |
| GO | retinoic acid receptor signaling pathway                            | 1  | 12  | 0.434951 | 0.60742787 |
| GO | response to copper ion                                              | 1  | 12  | 0.434951 | 0.60742787 |
| GO | positive regulation of cellular component movement                  | 1  | 12  | 0.434951 | 0.60742787 |
| GO | positive regulation of survival gene product expression             | 1  | 12  | 0.434951 | 0.60742787 |
| GO | costamere                                                           | 1  | 12  | 0.434951 | 0.60742787 |
| GO | neuromuscular synaptic transmission                                 | 1  | 12  | 0.434951 | 0.60742787 |
| GO | endothelial cell migration                                          | 1  | 12  | 0.434951 | 0.60742787 |
| GO | induction of positive chemotaxis                                    | 1  | 12  | 0.434951 | 0.60742787 |
| GO | Golgi-associated vesicle                                            | 1  | 12  | 0.434951 | 0.60742787 |
| GO | regulation of phosphorylation                                       | 1  | 12  | 0.434951 | 0.60742787 |
| GO | nBAF complex                                                        | 1  | 12  | 0.434951 | 0.60742787 |
| GO | histone acetylation                                                 | 1  | 12  | 0.434951 | 0.60742787 |
| GO | keratinocyte proliferation                                          | 1  | 12  | 0.434951 | 0.60742787 |
| GO | anion transmembrane transporter activity                            | 1  | 12  | 0.434951 | 0.60742787 |
| GO | Rac GTPase binding                                                  | 1  | 12  | 0.434951 | 0.60742787 |
| GO | calcium ion transport                                               | 6  | 114 | 0.436906 | 0.31492129 |
| GO | peptide binding                                                     | 2  | 32  | 0.441544 | 0.43197545 |
| GO | carbohydrate transport                                              | 2  | 32  | 0.441544 | 0.43197545 |
| GO | mitosis                                                             | 10 | 199 | 0.445344 | 0.25661915 |
| GO | transcription from RNA polymerase II promoter                       | 9  | 178 | 0.445663 | 0.26234618 |
| GO | ruffle                                                              | 3  | 53  | 0.449248 | 0.35198505 |
| GO | angiogenesis                                                        | 6  | 116 | 0.453455 | 0.27110501 |
| GO | Rab GTPase binding                                                  | 2  | 33  | 0.457363 | 0.38694124 |
| GO | learning or memory                                                  | 2  | 33  | 0.457363 | 0.38694124 |
| GO | positive regulation of actin filament polymerization                | 1  | 13  | 0.46121  | 0.52238484 |
| GO | bone mineralization                                                 | 1  | 13  | 0.46121  | 0.52238484 |
| GO | transcription factor TFTC complex                                   | 1  | 13  | 0.46121  | 0.52238484 |
| GO | spindle organization                                                | 1  | 13  | 0.46121  | 0.52238484 |
| GO | extracellular matrix binding                                        | 1  | 13  | 0.46121  | 0.52238484 |
| GO | autophagic vacuole membrane                                         | 1  | 13  | 0.46121  | 0.52238484 |
| GO | myoblast differentiation                                            | 1  | 13  | 0.46121  | 0.52238484 |
| GO | T cell proliferation                                                | 1  | 13  | 0.46121  | 0.52238484 |
| GO | induction of an organ                                               | 1  | 13  | 0.46121  | 0.52238484 |



|    |                                                                  |    |     |          |            |
|----|------------------------------------------------------------------|----|-----|----------|------------|
| GO | lipid homeostasis                                                | 1  | 13  | 0.46121  | 0.52238484 |
| GO | two-component sensor activity                                    | 1  | 13  | 0.46121  | 0.52238484 |
| GO | calcium-activated potassium channel activity                     | 1  | 13  | 0.46121  | 0.52238484 |
| GO | response to osmotic stress                                       | 1  | 13  | 0.46121  | 0.52238484 |
| GO | positive regulation of phosphoinositide 3-kinase cascade         | 1  | 13  | 0.46121  | 0.52238484 |
| GO | camera-type eye morphogenesis                                    | 1  | 13  | 0.46121  | 0.52238484 |
| GO | positive regulation of hormone secretion                         | 1  | 13  | 0.46121  | 0.52238484 |
| GO | transcription from RNA polymerase III promoter                   | 1  | 13  | 0.46121  | 0.52238484 |
| GO | steroid hormone receptor signaling pathway                       | 1  | 13  | 0.46121  | 0.52238484 |
| GO | positive regulation of interleukin-2 biosynthetic process        | 1  | 13  | 0.46121  | 0.52238484 |
| GO | histone deacetylase activity                                     | 1  | 13  | 0.46121  | 0.52238484 |
| GO | response to bacterium                                            | 1  | 13  | 0.46121  | 0.52238484 |
| GO | syntaxin binding                                                 | 1  | 13  | 0.46121  | 0.52238484 |
| GO | negative regulation of microtubule depolymerization              | 1  | 13  | 0.46121  | 0.52238484 |
| GO | labyrinthine layer blood vessel development                      | 1  | 13  | 0.46121  | 0.52238484 |
| GO | low-density lipoprotein binding                                  | 1  | 13  | 0.46121  | 0.52238484 |
| GO | transcription elongation factor complex                          | 1  | 13  | 0.46121  | 0.52238484 |
| GO | insulin-like growth factor receptor binding                      | 1  | 13  | 0.46121  | 0.52238484 |
| GO | muscle cell homeostasis                                          | 1  | 13  | 0.46121  | 0.52238484 |
| GO | glial cell differentiation                                       | 1  | 13  | 0.46121  | 0.52238484 |
| GO | inorganic anion exchanger activity                               | 1  | 13  | 0.46121  | 0.52238484 |
| GO | cellular defense response                                        | 3  | 54  | 0.461476 | 0.3186455  |
| GO | microtubule organizing center                                    | 5  | 96  | 0.462281 | 0.26326415 |
| GO | defense response to bacterium                                    | 4  | 75  | 0.462412 | 0.28410686 |
| GO | negative regulation of cell proliferation                        | 14 | 287 | 0.464181 | 0.18960168 |
| GO | G-protein coupled receptor activity                              | 17 | 352 | 0.469611 | 0.16669562 |
| GO | lyase activity                                                   | 5  | 97  | 0.47134  | 0.23944578 |
| GO | extrinsic to membrane                                            | 2  | 34  | 0.472919 | 0.34333718 |
| GO | presynaptic membrane                                             | 2  | 34  | 0.472919 | 0.34333718 |
| GO | B cell differentiation                                           | 2  | 34  | 0.472919 | 0.34333718 |
| GO | acid-amino acid ligase activity                                  | 2  | 34  | 0.472919 | 0.34333718 |
| GO | positive regulation of epithelial cell proliferation             | 2  | 34  | 0.472919 | 0.34333718 |
| GO | humoral immune response                                          | 2  | 34  | 0.472919 | 0.34333718 |
| GO | cell-cell junction                                               | 3  | 56  | 0.485568 | 0.25385211 |
| GO | proteasome complex                                               | 3  | 56  | 0.485568 | 0.25385211 |
| GO | condensed chromosome kinetochore                                 | 3  | 56  | 0.485568 | 0.25385211 |
| GO | glutamine metabolic process                                      | 1  | 14  | 0.48625  | 0.44439321 |
| GO | nuclear heterochromatin                                          | 1  | 14  | 0.48625  | 0.44439321 |
| GO | protein export from nucleus                                      | 1  | 14  | 0.48625  | 0.44439321 |
| GO | neuroblast proliferation                                         | 1  | 14  | 0.48625  | 0.44439321 |
| GO | positive regulation of natural killer cell mediated cytotoxicity | 1  | 14  | 0.48625  | 0.44439321 |
| GO | hindbrain development                                            | 1  | 14  | 0.48625  | 0.44439321 |
| GO | tropomyosin binding                                              | 1  | 14  | 0.48625  | 0.44439321 |
| GO | nitric oxide mediated signal transduction                        | 1  | 14  | 0.48625  | 0.44439321 |
| GO | regulation of neuronal synaptic plasticity                       | 1  | 14  | 0.48625  | 0.44439321 |
| GO | regulation of action potential                                   | 1  | 14  | 0.48625  | 0.44439321 |
| GO | rhythmic process                                                 | 1  | 14  | 0.48625  | 0.44439321 |
| GO | sensory perception                                               | 1  | 14  | 0.48625  | 0.44439321 |
| GO | positive regulation of protein catabolic process                 | 1  | 14  | 0.48625  | 0.44439321 |

|                                                                           |    |      |          |            |
|---------------------------------------------------------------------------|----|------|----------|------------|
| GO embryonic heart tube development                                       | 1  | 14   | 0.48625  | 0.44439321 |
| GO neurotransmitter:sodium symporter activity                             | 1  | 14   | 0.48625  | 0.44439321 |
| GO membrane protein ectodomain proteolysis                                | 1  | 14   | 0.48625  | 0.44439321 |
| GO positive regulation of protein secretion                               | 1  | 14   | 0.48625  | 0.44439321 |
| GO protein kinase C activity                                              | 1  | 14   | 0.48625  | 0.44439321 |
| GO regulation of vasoconstriction                                         | 1  | 14   | 0.48625  | 0.44439321 |
| GO NuRD complex                                                           | 1  | 14   | 0.48625  | 0.44439321 |
| GO chromosome organization                                                | 1  | 14   | 0.48625  | 0.44439321 |
| GO response to ATP                                                        | 1  | 14   | 0.48625  | 0.44439321 |
| GO solute:hydrogen antiporter activity                                    | 1  | 14   | 0.48625  | 0.44439321 |
| GO cellular response to starvation                                        | 1  | 14   | 0.48625  | 0.44439321 |
| GO eye development                                                        | 1  | 14   | 0.48625  | 0.44439321 |
| GO response to interferon-gamma                                           | 1  | 14   | 0.48625  | 0.44439321 |
| GO pathway-restricted SMAD protein phosphorylation                        | 1  | 14   | 0.48625  | 0.44439321 |
| GO calmodulin-dependent protein kinase activity                           | 1  | 14   | 0.48625  | 0.44439321 |
| GO mitochondrion                                                          | 56 | 1193 | 0.487197 | 0.08433329 |
| GO acute-phase response                                                   | 2  | 35   | 0.488202 | 0.30106851 |
| GO embryonic limb morphogenesis                                           | 2  | 35   | 0.488202 | 0.30106851 |
| GO centriole                                                              | 2  | 35   | 0.488202 | 0.30106851 |
| GO transcription corepressor activity                                     | 7  | 142  | 0.490903 | 0.16213932 |
| GO locomotory behavior                                                    | 3  | 57   | 0.497418 | 0.22234753 |
| GO DNA binding                                                            | 65 | 1392 | 0.501026 | 0.04647381 |
| GO postsynaptic density                                                   | 4  | 79   | 0.502977 | 0.17732626 |
| GO protein amino acid autophosphorylation                                 | 4  | 79   | 0.502977 | 0.17732626 |
| GO Rho protein signal transduction                                        | 2  | 36   | 0.503204 | 0.2600494  |
| GO autophagy                                                              | 2  | 36   | 0.503204 | 0.2600494  |
| GO microtubule basal body                                                 | 2  | 36   | 0.503204 | 0.2600494  |
| GO response to oxidative stress                                           | 5  | 101  | 0.507048 | 0.14661024 |
| GO chloride channel activity                                              | 3  | 58   | 0.509128 | 0.19140633 |
| GO oxidoreductase activity, acting on single donors with incorporation of | 3  | 58   | 0.509128 | 0.19140633 |
| GO cell development                                                       | 1  | 15   | 0.510128 | 0.37233243 |
| GO focal adhesion assembly                                                | 1  | 15   | 0.510128 | 0.37233243 |
| GO polysome                                                               | 1  | 15   | 0.510128 | 0.37233243 |
| GO female gamete generation                                               | 1  | 15   | 0.510128 | 0.37233243 |
| GO sulfate transport                                                      | 1  | 15   | 0.510128 | 0.37233243 |
| GO retinal ganglion cell axon guidance                                    | 1  | 15   | 0.510128 | 0.37233243 |
| GO homeostasis of number of cells within a tissue                         | 1  | 15   | 0.510128 | 0.37233243 |
| GO positive regulation of cytokine secretion                              | 1  | 15   | 0.510128 | 0.37233243 |
| GO oxidoreductase activity, acting on paired donors, with incorporation c | 1  | 15   | 0.510128 | 0.37233243 |
| GO reverse cholesterol transport                                          | 1  | 15   | 0.510128 | 0.37233243 |
| GO ATPase binding                                                         | 1  | 15   | 0.510128 | 0.37233243 |
| GO actin filament bundle assembly                                         | 1  | 15   | 0.510128 | 0.37233243 |
| GO binding of sperm to zona pellucida                                     | 1  | 15   | 0.510128 | 0.37233243 |
| GO leukocyte migration                                                    | 1  | 15   | 0.510128 | 0.37233243 |
| GO protein deubiquitination                                               | 1  | 15   | 0.510128 | 0.37233243 |
| GO voltage-gated sodium channel activity                                  | 1  | 15   | 0.510128 | 0.37233243 |
| GO cellular metabolic process                                             | 1  | 15   | 0.510128 | 0.37233243 |
| GO cellular response to heat                                              | 1  | 15   | 0.510128 | 0.37233243 |
| GO substrate-specific transmembrane transporter activity                  | 1  | 15   | 0.510128 | 0.37233243 |

|    |                                                                         |    |     |          |            |
|----|-------------------------------------------------------------------------|----|-----|----------|------------|
| GO | hair follicle development                                               | 1  | 15  | 0.510128 | 0.37233243 |
| GO | chemoattractant activity                                                | 1  | 15  | 0.510128 | 0.37233243 |
| GO | chondrocyte differentiation                                             | 1  | 15  | 0.510128 | 0.37233243 |
| GO | regulation of mitotic cell cycle                                        | 1  | 15  | 0.510128 | 0.37233243 |
| GO | myosin filament                                                         | 1  | 15  | 0.510128 | 0.37233243 |
| GO | GTPase binding                                                          | 1  | 15  | 0.510128 | 0.37233243 |
| GO | oxygen binding                                                          | 2  | 37  | 0.517919 | 0.2202019  |
| GO | protein catabolic process                                               | 2  | 37  | 0.517919 | 0.2202019  |
| GO | activation of adenylate cyclase activity by G-protein signaling pathway | 2  | 37  | 0.517919 | 0.2202019  |
| GO | protein serine/threonine phosphatase activity                           | 2  | 37  | 0.517919 | 0.2202019  |
| GO | NADH dehydrogenase (ubiquinone) activity                                | 2  | 37  | 0.517919 | 0.2202019  |
| GO | receptor binding                                                        | 10 | 211 | 0.519722 | 0.06596125 |
| GO | cell migration                                                          | 3  | 59  | 0.520694 | 0.16100667 |
| GO | sarcolemma                                                              | 3  | 59  | 0.520694 | 0.16100667 |
| GO | Golgi membrane                                                          | 16 | 343 | 0.529324 | 0.01813299 |
| GO | histone acetyltransferase activity                                      | 2  | 38  | 0.53234  | 0.18145498 |
| GO | positive regulation of gene expression                                  | 2  | 38  | 0.53234  | 0.18145498 |
| GO | positive regulation of angiogenesis                                     | 2  | 38  | 0.53234  | 0.18145498 |
| GO | Cajal body                                                              | 2  | 38  | 0.53234  | 0.18145498 |
| GO | specific transcriptional repressor activity                             | 2  | 38  | 0.53234  | 0.18145498 |
| GO | triglyceride lipase activity                                            | 1  | 16  | 0.532897 | 0.30532396 |
| GO | intrinsic to endoplasmic reticulum membrane                             | 1  | 16  | 0.532897 | 0.30532396 |
| GO | positive regulation of vasoconstriction                                 | 1  | 16  | 0.532897 | 0.30532396 |
| GO | smoothened signaling pathway                                            | 1  | 16  | 0.532897 | 0.30532396 |
| GO | glutathione metabolic process                                           | 1  | 16  | 0.532897 | 0.30532396 |
| GO | hydrogen peroxide catabolic process                                     | 1  | 16  | 0.532897 | 0.30532396 |
| GO | positive regulation of mitotic cell cycle                               | 1  | 16  | 0.532897 | 0.30532396 |
| GO | response to cocaine                                                     | 1  | 16  | 0.532897 | 0.30532396 |
| GO | negative regulation of insulin secretion                                | 1  | 16  | 0.532897 | 0.30532396 |
| GO | mitochondrial proton-transporting ATP synthase complex                  | 1  | 16  | 0.532897 | 0.30532396 |
| GO | cAMP-dependent protein kinase regulator activity                        | 1  | 16  | 0.532897 | 0.30532396 |
| GO | vitamin D receptor binding                                              | 1  | 16  | 0.532897 | 0.30532396 |
| GO | phosphatidylinositol-3,4,5-trisphosphate binding                        | 1  | 16  | 0.532897 | 0.30532396 |
| GO | response to cadmium ion                                                 | 1  | 16  | 0.532897 | 0.30532396 |
| GO | response to nutrient levels                                             | 1  | 16  | 0.532897 | 0.30532396 |
| GO | translation regulator activity                                          | 1  | 16  | 0.532897 | 0.30532396 |
| GO | ion transmembrane transporter activity                                  | 1  | 16  | 0.532897 | 0.30532396 |
| GO | positive regulation of endothelial cell migration                       | 1  | 16  | 0.532897 | 0.30532396 |
| GO | cartilage condensation                                                  | 1  | 16  | 0.532897 | 0.30532396 |
| GO | receptor complex                                                        | 1  | 16  | 0.532897 | 0.30532396 |
| GO | C-C chemokine receptor activity                                         | 1  | 16  | 0.532897 | 0.30532396 |
| GO | membrane depolarization                                                 | 1  | 16  | 0.532897 | 0.30532396 |
| GO | protein secretion                                                       | 1  | 16  | 0.532897 | 0.30532396 |
| GO | mannose binding                                                         | 1  | 16  | 0.532897 | 0.30532396 |
| GO | response to light stimulus                                              | 1  | 16  | 0.532897 | 0.30532396 |
| GO | beta-catenin binding                                                    | 2  | 39  | 0.546463 | 0.1437438  |
| GO | G-protein signaling, coupled to cyclic nucleotide second messenger      | 2  | 39  | 0.546463 | 0.1437438  |
| GO | transcription cofactor activity                                         | 2  | 39  | 0.546463 | 0.1437438  |
| GO | microtubule cytoskeleton organization                                   | 2  | 39  | 0.546463 | 0.1437438  |

|    |                                                                           |   |     |          |            |
|----|---------------------------------------------------------------------------|---|-----|----------|------------|
| GO | response to peptide hormone stimulus                                      | 3 | 62  | 0.554472 | 0.07285629 |
| GO | peroxidase activity                                                       | 1 | 17  | 0.554609 | 0.24266726 |
| GO | glutathione transferase activity                                          | 1 | 17  | 0.554609 | 0.24266726 |
| GO | sarcoplasmic reticulum membrane                                           | 1 | 17  | 0.554609 | 0.24266726 |
| GO | intracellular transport                                                   | 1 | 17  | 0.554609 | 0.24266726 |
| GO | embryonic pattern specification                                           | 1 | 17  | 0.554609 | 0.24266726 |
| GO | rough endoplasmic reticulum                                               | 1 | 17  | 0.554609 | 0.24266726 |
| GO | regulation of angiogenesis                                                | 1 | 17  | 0.554609 | 0.24266726 |
| GO | midbrain development                                                      | 1 | 17  | 0.554609 | 0.24266726 |
| GO | social behavior                                                           | 1 | 17  | 0.554609 | 0.24266726 |
| GO | positive regulation of calcium-mediated signaling                         | 1 | 17  | 0.554609 | 0.24266726 |
| GO | mitochondrial small ribosomal subunit                                     | 1 | 17  | 0.554609 | 0.24266726 |
| GO | 2 iron, 2 sulfur cluster binding                                          | 1 | 17  | 0.554609 | 0.24266726 |
| GO | histone deacetylation                                                     | 1 | 17  | 0.554609 | 0.24266726 |
| GO | embryonic hindlimb morphogenesis                                          | 1 | 17  | 0.554609 | 0.24266726 |
| GO | mitochondrial ribosome                                                    | 1 | 17  | 0.554609 | 0.24266726 |
| GO | regulation of pH                                                          | 1 | 17  | 0.554609 | 0.24266726 |
| GO | small nuclear ribonucleoprotein complex                                   | 1 | 17  | 0.554609 | 0.24266726 |
| GO | epithelial to mesenchymal transition                                      | 1 | 17  | 0.554609 | 0.24266726 |
| GO | actin filament capping                                                    | 1 | 17  | 0.554609 | 0.24266726 |
| GO | nuclear body                                                              | 1 | 17  | 0.554609 | 0.24266726 |
| GO | cis-Golgi network                                                         | 1 | 17  | 0.554609 | 0.24266726 |
| GO | spindle assembly                                                          | 1 | 17  | 0.554609 | 0.24266726 |
| GO | carbohydrate biosynthetic process                                         | 1 | 17  | 0.554609 | 0.24266726 |
| GO | sodium ion transport                                                      | 6 | 129 | 0.55723  | 0.00371365 |
| GO | receptor-mediated endocytosis                                             | 2 | 40  | 0.560285 | 0.10700898 |
| GO | cell redox homeostasis                                                    | 3 | 63  | 0.565411 | 0.04442756 |
| GO | glycolysis                                                                | 2 | 41  | 0.573803 | 0.07119604 |
| GO | peroxisomal membrane                                                      | 2 | 41  | 0.573803 | 0.07119604 |
| GO | negative regulation of cell cycle                                         | 2 | 41  | 0.573803 | 0.07119604 |
| GO | cholesterol homeostasis                                                   | 2 | 41  | 0.573803 | 0.07119604 |
| GO | neuron projection development                                             | 2 | 41  | 0.573803 | 0.07119604 |
| GO | ER to Golgi vesicle-mediated transport                                    | 2 | 41  | 0.573803 | 0.07119604 |
| GO | ribosome binding                                                          | 1 | 18  | 0.575313 | 0.18379545 |
| GO | lipoprotein metabolic process                                             | 1 | 18  | 0.575313 | 0.18379545 |
| GO | MHC class I protein complex                                               | 1 | 18  | 0.575313 | 0.18379545 |
| GO | regulation of insulin secretion                                           | 1 | 18  | 0.575313 | 0.18379545 |
| GO | protein import into nucleus, translocation                                | 1 | 18  | 0.575313 | 0.18379545 |
| GO | protein ubiquitination involved in ubiquitin-dependent protein catabolism | 1 | 18  | 0.575313 | 0.18379545 |
| GO | endocrine pancreas development                                            | 1 | 18  | 0.575313 | 0.18379545 |
| GO | cellular process                                                          | 1 | 18  | 0.575313 | 0.18379545 |
| GO | embryonic placenta development                                            | 1 | 18  | 0.575313 | 0.18379545 |
| GO | WW domain binding                                                         | 1 | 18  | 0.575313 | 0.18379545 |
| GO | phosphatidylinositol binding                                              | 1 | 18  | 0.575313 | 0.18379545 |
| GO | transmembrane receptor protein tyrosine phosphatase activity              | 1 | 18  | 0.575313 | 0.18379545 |
| GO | DNA fragmentation involved in apoptotic nuclear change                    | 1 | 18  | 0.575313 | 0.18379545 |
| GO | inner ear development                                                     | 1 | 18  | 0.575313 | 0.18379545 |
| GO | cortical cytoskeleton                                                     | 1 | 18  | 0.575313 | 0.18379545 |
| GO | peptidyl-threonine phosphorylation                                        | 1 | 18  | 0.575313 | 0.18379545 |

|    |                                                           |   |    |          |            |
|----|-----------------------------------------------------------|---|----|----------|------------|
| GO | heme biosynthetic process                                 | 1 | 18 | 0.575313 | 0.18379545 |
| GO | negative regulation of translation                        | 1 | 18 | 0.575313 | 0.18379545 |
| GO | cornified envelope                                        | 1 | 18 | 0.575313 | 0.18379545 |
| GO | establishment or maintenance of cell polarity             | 1 | 18 | 0.575313 | 0.18379545 |
| GO | anion transport                                           | 1 | 18 | 0.575313 | 0.18379545 |
| GO | transcription initiation from RNA polymerase II promoter  | 3 | 64 | 0.576184 | 0.01644786 |
| GO | patterning of blood vessels                               | 1 | 19 | 0.595056 | 0.12824378 |
| GO | protein amino acid O-linked glycosylation                 | 1 | 19 | 0.595056 | 0.12824378 |
| GO | cadherin binding                                          | 1 | 19 | 0.595056 | 0.12824378 |
| GO | negative regulation of cell differentiation               | 1 | 19 | 0.595056 | 0.12824378 |
| GO | leukotriene biosynthetic process                          | 1 | 19 | 0.595056 | 0.12824378 |
| GO | RNA metabolic process                                     | 1 | 19 | 0.595056 | 0.12824378 |
| GO | lipid transporter activity                                | 1 | 19 | 0.595056 | 0.12824378 |
| GO | phosphoprotein binding                                    | 1 | 19 | 0.595056 | 0.12824378 |
| GO | regulation of neuron differentiation                      | 1 | 19 | 0.595056 | 0.12824378 |
| GO | insulin-like growth factor binding                        | 1 | 19 | 0.595056 | 0.12824378 |
| GO | neutrophil chemotaxis                                     | 1 | 19 | 0.595056 | 0.12824378 |
| GO | telomere maintenance                                      | 1 | 19 | 0.595056 | 0.12824378 |
| GO | T-tubule                                                  | 1 | 19 | 0.595056 | 0.12824378 |
| GO | chemokine receptor activity                               | 1 | 19 | 0.595056 | 0.12824378 |
| GO | regulation of signal transduction                         | 1 | 19 | 0.595056 | 0.12824378 |
| GO | inner ear morphogenesis                                   | 2 | 43 | 0.599921 | 0.00213921 |
| GO | phosphotransferase activity, alcohol group as acceptor    | 1 | 20 | 0.613881 | 0.07562688 |
| GO | desmosome                                                 | 1 | 20 | 0.613881 | 0.07562688 |
| GO | translation elongation factor activity                    | 1 | 20 | 0.613881 | 0.07562688 |
| GO | phosphorylation                                           | 1 | 20 | 0.613881 | 0.07562688 |
| GO | response to steroid hormone stimulus                      | 1 | 20 | 0.613881 | 0.07562688 |
| GO | proteasomal ubiquitin-dependent protein catabolic process | 1 | 20 | 0.613881 | 0.07562688 |
| GO | ubiquitin binding                                         | 1 | 20 | 0.613881 | 0.07562688 |
| GO | hydrogen ion transmembrane transporter activity           | 1 | 20 | 0.613881 | 0.07562688 |
| GO | positive regulation of bone mineralization                | 1 | 20 | 0.613881 | 0.07562688 |
| GO | response to radiation                                     | 1 | 20 | 0.613881 | 0.07562688 |
| GO | positive regulation of cell adhesion                      | 1 | 20 | 0.613881 | 0.07562688 |
| GO | clathrin adaptor complex                                  | 1 | 20 | 0.613881 | 0.07562688 |
| GO | phosphate metabolic process                               | 1 | 20 | 0.613881 | 0.07562688 |
| GO | aromatase activity                                        | 1 | 21 | 0.631833 | 0.02562185 |
| GO | translation factor activity, nucleic acid binding         | 1 | 21 | 0.631833 | 0.02562185 |
| GO | transferase activity, transferring hexosyl groups         | 1 | 21 | 0.631833 | 0.02562185 |
| GO | branching morphogenesis of a tube                         | 1 | 21 | 0.631833 | 0.02562185 |
| GO | regulation of multicellular organism growth               | 1 | 21 | 0.631833 | 0.02562185 |
| GO | negative regulation of caspase activity                   | 1 | 21 | 0.631833 | 0.02562185 |
| GO | gastrulation with mouth forming second                    | 1 | 21 | 0.631833 | 0.02562185 |
| GO | positive regulation of inflammatory response              | 1 | 21 | 0.631833 | 0.02562185 |
| GO | dephosphorylation                                         | 1 | 21 | 0.631833 | 0.02562185 |
| GO | negative regulation of BMP signaling pathway              | 1 | 21 | 0.631833 | 0.02562185 |
| GO | defense response to virus                                 | 1 | 21 | 0.631833 | 0.02562185 |
| GO | release of cytochrome c from mitochondria                 | 1 | 21 | 0.631833 | 0.02562185 |
| GO | p53 binding                                               | 1 | 21 | 0.631833 | 0.02562185 |
| GO | negative regulation of gene-specific transcription        | 1 | 21 | 0.631833 | 0.02562185 |

|    |                                                       |     |      |          |            |
|----|-------------------------------------------------------|-----|------|----------|------------|
| GO | positive regulation of mesenchymal cell proliferation | 1   | 21   | 0.631833 | 0.02562185 |
| GO | integral to membrane                                  | 177 | 3857 | 0.989    | -0.1826334 |
| GO | protein kinase binding                                | 3   | 113  | 0.989    | -1.0079069 |
| GO | protein phosphatase binding                           | 1   | 25   | 0.989    | -0.1531802 |
| GO | membrane                                              | 161 | 3643 | 0.989    | -0.7174065 |
| GO | protein kinase activity                               | 6   | 170  | 0.989    | -0.6938495 |
| GO | protein serine/threonine kinase activity              | 12  | 335  | 0.989    | -0.9320831 |
| GO | signal transduction                                   | 78  | 1796 | 0.989    | -0.6376905 |
| GO | regulation of transcription, DNA-dependent            | 32  | 1013 | 0.989    | -2.3088614 |
| GO | transcription factor activity                         | 39  | 922  | 0.989    | -0.6129369 |
| GO | transport                                             | 21  | 511  | 0.989    | -0.5822528 |
| GO | metabolic process                                     | 20  | 455  | 0.989    | -0.2551548 |
| GO | protein modification process                          | 6   | 145  | 0.989    | -0.2908538 |
| GO | response to protein stimulus                          | 1   | 42   | 0.989    | -0.6977704 |
| GO | intracellular                                         | 80  | 1794 | 0.989    | -0.3912703 |
| GO | small GTPase mediated signal transduction             | 8   | 193  | 0.989    | -0.3312456 |
| GO | biological_process                                    | 17  | 547  | 0.989    | -1.7326533 |
| GO | RNA splicing, via transesterification reactions       | 1   | 25   | 0.989    | -0.1531802 |
| GO | binding                                               | 16  | 500  | 0.989    | -1.5552226 |
| GO | nuclear envelope                                      | 4   | 92   | 0.989    | -0.1354557 |
| GO | oxidation reduction                                   | 18  | 515  | 0.989    | -1.2563446 |
| GO | oxidoreductase activity                               | 12  | 418  | 0.989    | -1.7422284 |
| GO | hydrolase activity                                    | 39  | 917  | 0.989    | -0.5771692 |
| GO | nucleic acid binding                                  | 9   | 254  | 0.989    | -0.8394256 |
| GO | metal ion binding                                     | 116 | 2658 | 0.989    | -0.7399799 |
| GO | metallopeptidase activity                             | 2   | 88   | 0.989    | -1.0596005 |
| GO | early endosome membrane                               | 1   | 37   | 0.989    | -0.5617454 |
| GO | endosome                                              | 6   | 215  | 0.989    | -1.2988657 |
| GO | intracellular protein transport                       | 7   | 174  | 0.989    | -0.3912382 |
| GO | positive regulation of anti-apoptosis                 | 1   | 32   | 0.989    | -0.4087343 |
| GO | positive regulation of B cell proliferation           | 1   | 25   | 0.989    | -0.1531802 |
| GO | cell proliferation                                    | 12  | 286  | 0.989    | -0.3631586 |
| GO | perinuclear region of cytoplasm                       | 14  | 309  | 0.989    | -0.0956368 |
| GO | zinc ion binding                                      | 81  | 1867 | 0.989    | -0.661192  |
| GO | activation of phospholipase C activity                | 1   | 22   | 0.989    | -0.0220444 |
| GO | focal adhesion                                        | 3   | 86   | 0.989    | -0.5105313 |
| GO | Rho GTPase activator activity                         | 1   | 22   | 0.989    | -0.0220444 |
| GO | transcriptional repressor complex                     | 1   | 29   | 0.989    | -0.3062863 |
| GO | endoplasmic reticulum membrane                        | 21  | 518  | 0.989    | -0.6472347 |
| GO | endoplasmic reticulum                                 | 34  | 880  | 0.989    | -1.1268491 |
| GO | histone H3 acetylation                                | 1   | 24   | 0.989    | -0.1112588 |
| GO | transcription coactivator activity                    | 7   | 192  | 0.989    | -0.6607663 |
| GO | microsome                                             | 10  | 219  | 0.989    | -0.0552357 |
| GO | blood vessel remodeling                               | 1   | 22   | 0.989    | -0.0220444 |
| GO | extracellular space                                   | 26  | 647  | 0.989    | -0.7695562 |
| GO | immune response                                       | 9   | 303  | 0.989    | -1.3958099 |
| GO | receptor activity                                     | 52  | 1148 | 0.989    | -0.1904959 |
| GO | cell cortex                                           | 2   | 75   | 0.989    | -0.8154394 |
| GO | Z disc                                                | 2   | 46   | 0.989    | -0.0956653 |

|    |                                                                |    |     |       |            |
|----|----------------------------------------------------------------|----|-----|-------|------------|
| GO | protein transport                                              | 16 | 388 | 0.989 | -0.4923253 |
| GO | response to virus                                              | 3  | 105 | 0.989 | -0.8726045 |
| GO | regulation of transcription                                    | 37 | 956 | 0.989 | -1.1669373 |
| GO | SH3 domain binding                                             | 4  | 97  | 0.989 | -0.2442597 |
| GO | brush border membrane                                          | 1  | 26  | 0.989 | -0.1935193 |
| GO | G-protein coupled receptor protein signaling pathway           | 27 | 725 | 0.989 | -1.2004466 |
| GO | in utero embryonic development                                 | 6  | 136 | 0.989 | -0.1293253 |
| GO | molecular_function                                             | 19 | 577 | 0.989 | -1.5664987 |
| GO | response to unfolded protein                                   | 2  | 49  | 0.989 | -0.1874    |
| GO | Golgi apparatus                                                | 34 | 784 | 0.989 | -0.4179384 |
| GO | proteolysis                                                    | 18 | 423 | 0.989 | -0.3844594 |
| GO | vesicle-mediated transport                                     | 3  | 165 | 0.989 | -1.7325383 |
| GO | response to stimulus                                           | 14 | 477 | 0.989 | -1.7966141 |
| GO | sugar binding                                                  | 6  | 161 | 0.989 | -0.5556082 |
| GO | SH3/SH2 adaptor activity                                       | 2  | 50  | 0.989 | -0.2167724 |
| GO | neuropeptide signaling pathway                                 | 3  | 85  | 0.989 | -0.4895215 |
| GO | chemotaxis                                                     | 5  | 117 | 0.989 | -0.1911748 |
| GO | cytokine activity                                              | 6  | 143 | 0.989 | -0.2558159 |
| GO | heme binding                                                   | 4  | 110 | 0.989 | -0.5037882 |
| GO | anchored to membrane                                           | 2  | 109 | 0.989 | -1.3977781 |
| GO | olfactory receptor activity                                    | 7  | 290 | 0.989 | -1.8188629 |
| GO | sensory perception of smell                                    | 8  | 305 | 0.989 | -1.6910755 |
| GO | inflammatory response                                          | 8  | 222 | 0.989 | -0.7411582 |
| GO | serine-type endopeptidase inhibitor activity                   | 2  | 90  | 0.989 | -1.0944519 |
| GO | positive regulation of NF-kappaB transcription factor activity | 1  | 47  | 0.989 | -0.8208503 |
| GO | protein amino acid dephosphorylation                           | 3  | 120 | 0.989 | -1.1197177 |
| GO | protein tyrosine phosphatase activity                          | 2  | 82  | 0.989 | -0.9509667 |
| GO | protein tyrosine/serine/threonine phosphatase activity         | 1  | 30  | 0.989 | -0.3414697 |
| GO | catalytic activity                                             | 5  | 114 | 0.989 | -0.131464  |
| GO | carbohydrate metabolic process                                 | 8  | 198 | 0.989 | -0.4059095 |
| GO | external side of plasma membrane                               | 5  | 121 | 0.989 | -0.2685147 |
| GO | phosphoprotein phosphatase activity                            | 1  | 36  | 0.989 | -0.532663  |
| GO | structural constituent of cytoskeleton                         | 3  | 73  | 0.989 | -0.2175083 |
| GO | enzyme binding                                                 | 5  | 114 | 0.989 | -0.131464  |
| GO | response to lipopolysaccharide                                 | 3  | 105 | 0.989 | -0.8726045 |
| GO | acyltransferase activity                                       | 3  | 133 | 0.989 | -1.3135973 |
| GO | cytoplasmic vesicle                                            | 9  | 229 | 0.989 | -0.5166675 |
| GO | lysosomal membrane                                             | 2  | 83  | 0.989 | -0.9695223 |
| GO | intracellular membrane-bounded organelle                       | 2  | 127 | 0.989 | -1.6492317 |
| GO | microtubule motor activity                                     | 3  | 76  | 0.989 | -0.2892849 |
| GO | chromatin modification                                         | 5  | 204 | 0.989 | -1.4966426 |
| GO | growth factor activity                                         | 7  | 152 | 0.989 | -0.0229643 |
| GO | keratinocyte differentiation                                   | 1  | 29  | 0.989 | -0.3062863 |
| GO | membrane fraction                                              | 15 | 472 | 0.989 | -1.532941  |
| GO | regulation of translational initiation                         | 1  | 24  | 0.989 | -0.1112588 |
| GO | translation initiation factor activity                         | 1  | 49  | 0.989 | -0.8671009 |
| GO | translational initiation                                       | 1  | 36  | 0.989 | -0.532663  |
| GO | positive regulation of cell proliferation                      | 13 | 290 | 0.989 | -0.1317326 |
| GO | protein N-terminus binding                                     | 2  | 72  | 0.989 | -0.7540156 |

|    |                                                                         |   |     |       |            |
|----|-------------------------------------------------------------------------|---|-----|-------|------------|
| GO | chloride channel complex                                                | 2 | 54  | 0.989 | -0.328909  |
| GO | activation of protein kinase C activity by G-protein coupled receptor p | 1 | 34  | 0.989 | -0.4723141 |
| GO | anatomical structure morphogenesis                                      | 4 | 101 | 0.989 | -0.3274703 |
| GO | positive regulation of I-kappaB kinase/NF-kappaB cascade                | 2 | 109 | 0.989 | -1.3977781 |
| GO | blood coagulation                                                       | 3 | 71  | 0.989 | -0.1680594 |
| GO | phosphoinositide phospholipase C activity                               | 1 | 26  | 0.989 | -0.1935193 |
| GO | epidermis development                                                   | 3 | 75  | 0.989 | -0.2656663 |
| GO | electron transport chain                                                | 2 | 86  | 0.989 | -1.0240913 |
| GO | generation of precursor metabolites and energy                          | 1 | 55  | 0.989 | -0.9973719 |
| GO | mitochondrial matrix                                                    | 5 | 147 | 0.989 | -0.7188739 |
| GO | fibroblast growth factor receptor signaling pathway                     | 1 | 33  | 0.989 | -0.4409543 |
| GO | cell-matrix adhesion                                                    | 3 | 68  | 0.989 | -0.0912824 |
| GO | insulin secretion                                                       | 1 | 23  | 0.989 | -0.0676046 |
| GO | mitochondrial outer membrane                                            | 3 | 81  | 0.989 | -0.4031171 |
| GO | peroxisome                                                              | 4 | 92  | 0.989 | -0.1354557 |
| GO | synaptic vesicle                                                        | 2 | 46  | 0.989 | -0.0956653 |
| GO | cell surface receptor linked signaling pathway                          | 7 | 161 | 0.989 | -0.1795191 |
| GO | feeding behavior                                                        | 1 | 25  | 0.989 | -0.1531802 |
| GO | T cell receptor signaling pathway                                       | 1 | 22  | 0.989 | -0.0220444 |
| GO | chloride transport                                                      | 2 | 50  | 0.989 | -0.2167724 |
| GO | nuclear-transcribed mRNA catabolic process, nonsense-mediated dec       | 1 | 28  | 0.989 | -0.2699629 |
| GO | guanyl-nucleotide exchange factor activity                              | 4 | 120 | 0.989 | -0.684566  |
| GO | mitochondrial inner membrane                                            | 7 | 231 | 0.989 | -1.172796  |
| GO | microtubule cytoskeleton                                                | 2 | 53  | 0.989 | -0.3016326 |
| GO | cilium                                                                  | 2 | 90  | 0.989 | -1.0944519 |
| GO | actin filament organization                                             | 1 | 28  | 0.989 | -0.2699629 |
| GO | lung development                                                        | 2 | 60  | 0.989 | -0.4832936 |
| GO | mammary gland development                                               | 1 | 25  | 0.989 | -0.1531802 |
| GO | promoter binding                                                        | 4 | 101 | 0.989 | -0.3274703 |
| GO | transcription activator activity                                        | 9 | 227 | 0.989 | -0.4894393 |
| GO | mitochondrial membrane                                                  | 2 | 51  | 0.989 | -0.2455862 |
| GO | mitochondrion organization                                              | 1 | 25  | 0.989 | -0.1531802 |
| GO | response to stress                                                      | 4 | 112 | 0.989 | -0.5411256 |
| GO | inhibition of adenylate cyclase activity by G-protein signaling pathway | 1 | 30  | 0.989 | -0.3414697 |
| GO | endoplasmic reticulum lumen                                             | 3 | 68  | 0.989 | -0.0912824 |
| GO | iron ion binding                                                        | 1 | 65  | 0.989 | -1.1918885 |
| GO | transcription factor binding                                            | 4 | 170 | 0.989 | -1.4260212 |
| GO | general RNA polymerase II transcription factor activity                 | 1 | 22  | 0.989 | -0.0220444 |
| GO | RNA elongation from RNA polymerase II promoter                          | 2 | 47  | 0.989 | -0.126875  |
| GO | cell morphogenesis                                                      | 1 | 30  | 0.989 | -0.3414697 |
| GO | phosphoinositide binding                                                | 1 | 56  | 0.989 | -1.0179868 |
| GO | cell-cell signaling                                                     | 8 | 238 | 0.989 | -0.9464447 |
| GO | steroid binding                                                         | 1 | 23  | 0.989 | -0.0676046 |
| GO | cholesterol biosynthetic process                                        | 1 | 25  | 0.989 | -0.1531802 |
| GO | transcription repressor activity                                        | 5 | 173 | 0.989 | -1.101355  |
| GO | embryonic skeletal system morphogenesis                                 | 1 | 36  | 0.989 | -0.532663  |
| GO | fatty acid metabolic process                                            | 2 | 75  | 0.989 | -0.8154394 |
| GO | cysteine-type endopeptidase inhibitor activity                          | 1 | 22  | 0.989 | -0.0220444 |
| GO | monooxygenase activity                                                  | 2 | 52  | 0.989 | -0.2738654 |



|    |                                                                       |   |     |       |            |
|----|-----------------------------------------------------------------------|---|-----|-------|------------|
| GO | late endosome                                                         | 1 | 43  | 0.989 | -0.7233198 |
| GO | negative regulation of inflammatory response                          | 1 | 24  | 0.989 | -0.1112588 |
| GO | phospholipid binding                                                  | 2 | 49  | 0.989 | -0.1874    |
| GO | negative regulation of transcription, DNA-dependent                   | 3 | 91  | 0.989 | -0.6123225 |
| GO | antigen processing and presentation                                   | 1 | 28  | 0.989 | -0.2699629 |
| GO | activation of pro-apoptotic gene products                             | 1 | 22  | 0.989 | -0.0220444 |
| GO | transmembrane receptor activity                                       | 5 | 108 | 0.989 | -0.0072678 |
| GO | positive regulation of peptidyl-tyrosine phosphorylation              | 1 | 42  | 0.989 | -0.6977704 |
| GO | defense response                                                      | 2 | 63  | 0.989 | -0.5552339 |
| GO | erythrocyte differentiation                                           | 1 | 23  | 0.989 | -0.0676046 |
| GO | ovarian follicle development                                          | 1 | 36  | 0.989 | -0.532663  |
| GO | cell surface                                                          | 4 | 214 | 0.989 | -1.9400301 |
| GO | potassium channel activity                                            | 1 | 33  | 0.989 | -0.4409543 |
| GO | cell maturation                                                       | 1 | 23  | 0.989 | -0.0676046 |
| GO | histone deacetylase binding                                           | 1 | 39  | 0.989 | -0.6179299 |
| GO | intermediate filament                                                 | 2 | 80  | 0.989 | -0.9132783 |
| GO | keratin filament                                                      | 1 | 64  | 0.989 | -1.1734999 |
| GO | gene silencing by RNA                                                 | 1 | 30  | 0.989 | -0.3414697 |
| GO | post-translational protein modification                               | 1 | 27  | 0.989 | -0.2324082 |
| GO | response to insulin stimulus                                          | 2 | 51  | 0.989 | -0.2455862 |
| GO | transcription factor complex                                          | 3 | 140 | 0.989 | -1.4116177 |
| GO | negative regulation of NF-kappaB transcription factor activity        | 1 | 22  | 0.989 | -0.0220444 |
| GO | lysosome organization                                                 | 1 | 22  | 0.989 | -0.0220444 |
| GO | lysosome                                                              | 2 | 144 | 0.989 | -1.8633544 |
| GO | mitochondrial electron transport, NADH to ubiquinone                  | 1 | 36  | 0.989 | -0.532663  |
| GO | mitochondrial respiratory chain complex I                             | 1 | 39  | 0.989 | -0.6179299 |
| GO | respiratory chain                                                     | 1 | 42  | 0.989 | -0.6977704 |
| GO | peripheral nervous system development                                 | 1 | 24  | 0.989 | -0.1112588 |
| GO | pigmentation                                                          | 1 | 22  | 0.989 | -0.0220444 |
| GO | wound healing                                                         | 2 | 49  | 0.989 | -0.1874    |
| GO | ATP biosynthetic process                                              | 1 | 53  | 0.989 | -0.9552503 |
| GO | hydrolase activity, acting on acid anhydrides, catalyzing transmembra | 2 | 47  | 0.989 | -0.126875  |
| GO | centrosome                                                            | 4 | 117 | 0.989 | -0.631835  |
| GO | response to cAMP                                                      | 2 | 46  | 0.989 | -0.0956653 |
| GO | excretion                                                             | 1 | 35  | 0.989 | -0.5028674 |
| GO | transport vesicle                                                     | 1 | 39  | 0.989 | -0.6179299 |
| GO | kinetochore                                                           | 2 | 49  | 0.989 | -0.1874    |
| GO | hydrolase activity, acting on glycosyl bonds                          | 1 | 44  | 0.989 | -0.7483802 |
| GO | peptide hormone binding                                               | 1 | 22  | 0.989 | -0.0220444 |
| GO | protease binding                                                      | 1 | 23  | 0.989 | -0.0676046 |
| GO | translational elongation                                              | 4 | 87  | 0.989 | -0.0207031 |
| GO | secretory granule                                                     | 1 | 51  | 0.989 | -0.9118615 |
| GO | Wnt receptor signaling pathway                                        | 3 | 90  | 0.989 | -0.5923809 |
| GO | drug binding                                                          | 1 | 44  | 0.989 | -0.7483802 |
| GO | insoluble fraction                                                    | 1 | 39  | 0.989 | -0.6179299 |
| GO | aminopeptidase activity                                               | 1 | 28  | 0.989 | -0.2699629 |
| GO | cellular amino acid metabolic process                                 | 1 | 36  | 0.989 | -0.532663  |
| GO | metallocarboxypeptidase activity                                      | 1 | 25  | 0.989 | -0.1531802 |
| GO | positive regulation of cell division                                  | 1 | 37  | 0.989 | -0.5617454 |

|    |                                                                                    |   |     |       |            |
|----|------------------------------------------------------------------------------------|---|-----|-------|------------|
| GO | negative regulation of transcription                                               | 6 | 148 | 0.989 | -0.342548  |
| GO | apical part of cell                                                                | 1 | 42  | 0.989 | -0.6977704 |
| GO | cell projection organization                                                       | 1 | 28  | 0.989 | -0.2699629 |
| GO | calcium channel activity                                                           | 2 | 44  | 0.989 | -0.0311935 |
| GO | exocytosis                                                                         | 2 | 47  | 0.989 | -0.126875  |
| GO | amino acid transmembrane transporter activity                                      | 1 | 26  | 0.989 | -0.1935193 |
| GO | amino acid transport                                                               | 1 | 46  | 0.989 | -0.7971248 |
| GO | neurotransmitter transport                                                         | 1 | 40  | 0.989 | -0.6451034 |
| GO | GDP binding                                                                        | 1 | 26  | 0.989 | -0.1935193 |
| GO | late endosome membrane                                                             | 2 | 51  | 0.989 | -0.2455862 |
| GO | acrosomal vesicle                                                                  | 1 | 33  | 0.989 | -0.4409543 |
| GO | phagocytosis                                                                       | 1 | 27  | 0.989 | -0.2324082 |
| GO | 4 iron, 4 sulfur cluster binding                                                   | 1 | 25  | 0.989 | -0.1531802 |
| GO | positive regulation of T cell proliferation                                        | 1 | 27  | 0.989 | -0.2324082 |
| GO | response to heat                                                                   | 2 | 47  | 0.989 | -0.126875  |
| GO | negative regulation of transforming growth factor beta receptor signaling pathway  | 1 | 28  | 0.989 | -0.2699629 |
| GO | endomembrane system                                                                | 2 | 77  | 0.989 | -0.8552235 |
| GO | integral to endoplasmic reticulum membrane                                         | 2 | 46  | 0.989 | -0.0956653 |
| GO | cilium axoneme                                                                     | 1 | 26  | 0.989 | -0.1935193 |
| GO | positive regulation of multicellular organism growth                               | 1 | 23  | 0.989 | -0.0676046 |
| GO | reciprocal meiotic recombination                                                   | 1 | 22  | 0.989 | -0.0220444 |
| GO | regulation of blood pressure                                                       | 1 | 49  | 0.989 | -0.8671009 |
| GO | activation of MAPK activity                                                        | 1 | 53  | 0.989 | -0.9552503 |
| GO | rRNA binding                                                                       | 1 | 23  | 0.989 | -0.0676046 |
| GO | cytosolic large ribosomal subunit                                                  | 1 | 33  | 0.989 | -0.4409543 |
| GO | cytosolic small ribosomal subunit                                                  | 1 | 34  | 0.989 | -0.4723141 |
| GO | chemokine activity                                                                 | 1 | 42  | 0.989 | -0.6977704 |
| GO | response to gamma radiation                                                        | 1 | 24  | 0.989 | -0.1112588 |
| GO | response to interleukin-1                                                          | 1 | 24  | 0.989 | -0.1112588 |
| GO | regulation of growth                                                               | 2 | 51  | 0.989 | -0.2455862 |
| GO | glucose transport                                                                  | 1 | 22  | 0.989 | -0.0220444 |
| GO | heat shock protein binding                                                         | 1 | 62  | 0.989 | -1.136068  |
| GO | response to hydrogen peroxide                                                      | 1 | 40  | 0.989 | -0.6451034 |
| GO | cation transport                                                                   | 1 | 65  | 0.989 | -1.1918885 |
| GO | protein localization                                                               | 1 | 54  | 0.989 | -0.9764635 |
| GO | negative regulation of gene expression                                             | 1 | 23  | 0.989 | -0.0676046 |
| GO | BMP signaling pathway                                                              | 1 | 43  | 0.989 | -0.7233198 |
| GO | mesoderm formation                                                                 | 1 | 22  | 0.989 | -0.0220444 |
| GO | negative regulation of epithelial cell proliferation                               | 1 | 26  | 0.989 | -0.1935193 |
| GO | negative regulation of neuron differentiation                                      | 1 | 27  | 0.989 | -0.2324082 |
| GO | protein stabilization                                                              | 1 | 31  | 0.989 | -0.3755947 |
| GO | protein dimerization activity                                                      | 2 | 84  | 0.989 | -0.9878918 |
| GO | specific RNA polymerase II transcription factor activity                           | 1 | 33  | 0.989 | -0.4409543 |
| GO | positive regulation of transcription factor activity                               | 1 | 25  | 0.989 | -0.1531802 |
| GO | respiratory gaseous exchange                                                       | 1 | 29  | 0.989 | -0.3062863 |
| GO | positive regulation of gene-specific transcription from RNA polymerase II promoter | 2 | 92  | 0.989 | -1.1286757 |
| GO | positive regulation of protein ubiquitination                                      | 1 | 25  | 0.989 | -0.1531802 |
| GO | mRNA binding                                                                       | 1 | 41  | 0.989 | -0.6717072 |
| GO | tRNA binding                                                                       | 1 | 24  | 0.989 | -0.1112588 |

|    |                                                    |   |     |          |            |
|----|----------------------------------------------------|---|-----|----------|------------|
| GO | palate development                                 | 1 | 34  | 0.989    | -0.4723141 |
| GO | peptidyl-serine phosphorylation                    | 1 | 26  | 0.989    | -0.1935193 |
| GO | positive regulation of cell growth                 | 1 | 34  | 0.989    | -0.4723141 |
| GO | platelet alpha granule lumen                       | 1 | 34  | 0.989    | -0.4723141 |
| GO | enzyme inhibitor activity                          | 1 | 27  | 0.989    | -0.2324082 |
| GO | response to hormone stimulus                       | 1 | 44  | 0.989    | -0.7483802 |
| GO | calcium-dependent protein binding                  | 1 | 31  | 0.989    | -0.3755947 |
| GO | regulation of heart contraction                    | 1 | 32  | 0.989    | -0.4087343 |
| GO | ubiquitin-specific protease activity               | 1 | 28  | 0.989    | -0.2699629 |
| GO | positive regulation of gene-specific transcription | 1 | 39  | 0.989    | -0.6179299 |
| GO | transcription regulator activity                   | 1 | 102 | 0.989    | -1.76307   |
| GO | voltage-gated calcium channel activity             | 1 | 23  | 0.989    | -0.0676046 |
| GO | calcium-mediated signaling                         | 1 | 33  | 0.989    | -0.4409543 |
| GO | cilium assembly                                    | 1 | 24  | 0.989    | -0.1112588 |
| GO | spermatid development                              | 1 | 32  | 0.989    | -0.4087343 |
| GO | regulation of cell cycle                           | 1 | 42  | 0.989    | -0.6977704 |
| GO | innate immune response                             | 2 | 109 | 0.989    | -1.3977781 |
| GO | Golgi cisterna membrane                            | 1 | 63  | 0.989    | -1.1548954 |
| GO | integral to Golgi membrane                         | 2 | 45  | 0.989    | -0.0637828 |
| GO | protein amino acid glycosylation                   | 3 | 65  | 0.989    | -0.0110985 |
| GO | galactosyltransferase activity                     | 1 | 23  | 0.989    | -0.0676046 |
| GO | cellular membrane organization                     | 1 | 53  | 0.989    | -0.9552503 |
| GO | post-Golgi vesicle-mediated transport              | 1 | 37  | 0.989    | -0.5617454 |
| GO | microtubule associated complex                     | 1 | 25  | 0.989    | -0.1531802 |
| GO | myelination                                        | 1 | 29  | 0.989    | -0.3062863 |
| GO | small GTPase regulator activity                    | 1 | 28  | 0.989    | -0.2699629 |
| GO | sulfotransferase activity                          | 1 | 34  | 0.989    | -0.4723141 |
| GO | positive regulation of JUN kinase activity         | 1 | 9   | 0.348252 | 0.9220806  |

core (z)
