# Supplementary material
Source: PubMed Central journal article supplement (PMC4070715)
Supplement: NIHMS587873-supplement-Supplement_3.pdf [file NIHMS587873-supplement-Supplement_3.pdf]

| Cate | Term                 | Count | Count i | P-value   | Gene   | Title                                                               |
|------|----------------------|-------|---------|-----------|--------|---------------------------------------------------------------------|
| GO   | extracellular region | 181   | 1730    | 2.324E-09 | #####  | chromosome 17 open reading frame 99                                 |
| GO   | extracellular region | 181   | 1730    | 2.324E-09 | 10085  | EGF-like repeats and discoidin I-like domains 3                     |
| GO   | extracellular region | 181   | 1730    | 2.324E-09 | 10117  | enamelin                                                            |
| GO   | extracellular region | 181   | 1730    | 2.324E-09 | 10216  | proteoglycan 4                                                      |
| GO   | extracellular region | 181   | 1730    | 2.324E-09 | 10417  | spondin 2, extracellular matrix protein                             |
| GO   | extracellular region | 181   | 1730    | 2.324E-09 | 10418  | spondin 1, extracellular matrix protein                             |
| GO   | extracellular region | 181   | 1730    | 2.324E-09 | 10447  | family with sequence similarity 3, member C                         |
| GO   | extracellular region | 181   | 1730    | 2.324E-09 | 10516  | fibulin 5                                                           |
| GO   | extracellular region | 181   | 1730    | 2.324E-09 | 10752  | cell adhesion molecule with homology to L1CAM (close homolog of L1) |
| GO   | extracellular region | 181   | 1730    | 2.324E-09 | 1114   | chromogranin B (secretogranin 1)                                    |
| GO   | extracellular region | 181   | 1730    | 2.324E-09 | 1117   | chitinase 3-like 2                                                  |
| GO   | extracellular region | 181   | 1730    | 2.324E-09 | 11202  | kallikrein-related peptidase 8                                      |
| GO   | extracellular region | 181   | 1730    | 2.324E-09 | 113177 | chromosome 19 open reading frame 36                                 |
| GO   | extracellular region | 181   | 1730    | 2.324E-09 | 116844 | leucine-rich alpha-2-glycoprotein 1                                 |
| GO   | extracellular region | 181   | 1730    | 2.324E-09 | 118429 | anthrax toxin receptor 2                                            |
| GO   | extracellular region | 181   | 1730    | 2.324E-09 | 123    | perilipin 2                                                         |
| GO   | extracellular region | 181   | 1730    | 2.324E-09 | 124220 | zymogen granule protein 16 homolog B (rat)                          |
| GO   | extracellular region | 181   | 1730    | 2.324E-09 | 126147 | netrin 5                                                            |
| GO   | extracellular region | 181   | 1730    | 2.324E-09 | 126638 | repetin                                                             |
| GO   | extracellular region | 181   | 1730    | 2.324E-09 | 1295   | collagen, type VIII, alpha 1                                        |
| GO   | extracellular region | 181   | 1730    | 2.324E-09 | 1363   | carboxypeptidase E                                                  |
| GO   | extracellular region | 181   | 1730    | 2.324E-09 | 1435   | colony stimulating factor 1 (macrophage)                            |
| GO   | extracellular region | 181   | 1730    | 2.324E-09 | 1462   | versican                                                            |
| GO   | extracellular region | 181   | 1730    | 2.324E-09 | 1469   | cystatin SN                                                         |
| GO   | extracellular region | 181   | 1730    | 2.324E-09 | 1471   | cystatin C                                                          |
| GO   | extracellular region | 181   | 1730    | 2.324E-09 | 1508   | cathepsin B                                                         |
| GO   | extracellular region | 181   | 1730    | 2.324E-09 | 153218 | serine peptidase inhibitor, Kazal type 13 (putative)                |
| GO   | extracellular region | 181   | 1730    | 2.324E-09 | 157869 | chromosome 8 open reading frame 84                                  |
| GO   | extracellular region | 181   | 1730    | 2.324E-09 | 168667 | BMP binding endothelial regulator                                   |
| GO   | extracellular region | 181   | 1730    | 2.324E-09 | 170692 | ADAM metallopeptidase with thrombospondin type 1 motif, 18          |
| GO   | extracellular region | 181   | 1730    | 2.324E-09 | 1755   | deleted in malignant brain tumors 1                                 |
| GO   | extracellular region | 181   | 1730    | 2.324E-09 | 1803   | dipeptidyl-peptidase 4                                              |
| GO   | extracellular region | 181   | 1730    | 2.324E-09 | 183    | angiotensinogen (serpin peptidase inhibitor, clade A, member 8)     |
| GO   | extracellular region | 181   | 1730    | 2.324E-09 | 1839   | heparin-binding EGF-like growth factor                              |
| GO   | extracellular region | 181   | 1730    | 2.324E-09 | 1906   | endothelin 1                                                        |

|    |                      |     |      |           |                                                                            |
|----|----------------------|-----|------|-----------|----------------------------------------------------------------------------|
| GO | extracellular region | 181 | 1730 | 2.324E-09 | 1953 multiple EGF-like-domains 6                                           |
| GO | extracellular region | 181 | 1730 | 2.324E-09 | 200504 gastrokine 2                                                        |
| GO | extracellular region | 181 | 1730 | 2.324E-09 | 2153 coagulation factor V (proaccelerin, labile factor)                    |
| GO | extracellular region | 181 | 1730 | 2.324E-09 | 219348 placenta-specific 9                                                 |
| GO | extracellular region | 181 | 1730 | 2.324E-09 | 2200 fibrillin 1                                                           |
| GO | extracellular region | 181 | 1730 | 2.324E-09 | 2201 fibrillin 2                                                           |
| GO | extracellular region | 181 | 1730 | 2.324E-09 | 221806 von Willebrand factor D and EGF domains                             |
| GO | extracellular region | 181 | 1730 | 2.324E-09 | 223117 sema domain, immunoglobulin domain (Ig), short basic domain, secret |
| GO | extracellular region | 181 | 1730 | 2.324E-09 | 2239 glypican 4                                                            |
| GO | extracellular region | 181 | 1730 | 2.324E-09 | 2262 glypican 5                                                            |
| GO | extracellular region | 181 | 1730 | 2.324E-09 | 2263 fibroblast growth factor receptor 2                                   |
| GO | extracellular region | 181 | 1730 | 2.324E-09 | 22795 nidogen 2 (osteonidogen)                                             |
| GO | extracellular region | 181 | 1730 | 2.324E-09 | 22915 multimerin 1                                                         |
| GO | extracellular region | 181 | 1730 | 2.324E-09 | 22925 phospholipase A2 receptor 1, 180kDa                                  |
| GO | extracellular region | 181 | 1730 | 2.324E-09 | 23145 SCO-spondin homolog (Bos taurus)                                     |
| GO | extracellular region | 181 | 1730 | 2.324E-09 | 2331 fibromodulin                                                          |
| GO | extracellular region | 181 | 1730 | 2.324E-09 | 23418 crumbs homolog 1 (Drosophila)                                        |
| GO | extracellular region | 181 | 1730 | 2.324E-09 | 23529 cardiotrophin-like cytokine factor 1                                 |
| GO | extracellular region | 181 | 1730 | 2.324E-09 | 23780 apolipoprotein L, 2                                                  |
| GO | extracellular region | 181 | 1730 | 2.324E-09 | 255738 proprotein convertase subtilisin/kexin type 9                       |
| GO | extracellular region | 181 | 1730 | 2.324E-09 | 255743 nephronectin                                                        |
| GO | extracellular region | 181 | 1730 | 2.324E-09 | 2589 UDP-N-acetyl-alpha-D-galactosamine:polypeptide N-acetylgalactosami    |
| GO | extracellular region | 181 | 1730 | 2.324E-09 | 25890 ABI family, member 3 (NESH) binding protein                          |
| GO | extracellular region | 181 | 1730 | 2.324E-09 | 25903 olfactomedin-like 2B                                                 |
| GO | extracellular region | 181 | 1730 | 2.324E-09 | 26281 fibroblast growth factor 20                                          |
| GO | extracellular region | 181 | 1730 | 2.324E-09 | 2638 group-specific component (vitamin D binding protein)                  |
| GO | extracellular region | 181 | 1730 | 2.324E-09 | 26998 fetuin B                                                             |
| GO | extracellular region | 181 | 1730 | 2.324E-09 | 27123 dickkopf homolog 2 (Xenopus laevis)                                  |
| GO | extracellular region | 181 | 1730 | 2.324E-09 | 283316 CD163 molecule-like 1                                               |
| GO | extracellular region | 181 | 1730 | 2.324E-09 | 2921 chemokine (C-X-C motif) ligand 3                                      |
| GO | extracellular region | 181 | 1730 | 2.324E-09 | 30008 EGF-containing fibulin-like extracellular matrix protein 2           |
| GO | extracellular region | 181 | 1730 | 2.324E-09 | 30010 neurexophilin 1                                                      |
| GO | extracellular region | 181 | 1730 | 2.324E-09 | 3373 hyaluronoglucosaminidase 1                                            |
| GO | extracellular region | 181 | 1730 | 2.324E-09 | 340654 lipase, family member M                                             |
| GO | extracellular region | 181 | 1730 | 2.324E-09 | 345275 hydroxysteroid (17-beta) dehydrogenase 13                           |
| GO | extracellular region | 181 | 1730 | 2.324E-09 | 3479 insulin-like growth factor 1 (somatomedin C)                          |

|    |                      |     |      |           |                                                                                  |
|----|----------------------|-----|------|-----------|----------------------------------------------------------------------------------|
| GO | extracellular region | 181 | 1730 | 2.324E-09 | 3484 insulin-like growth factor binding protein 1                                |
| GO | extracellular region | 181 | 1730 | 2.324E-09 | 3486 insulin-like growth factor binding protein 3                                |
| GO | extracellular region | 181 | 1730 | 2.324E-09 | 3488 insulin-like growth factor binding protein 5                                |
| GO | extracellular region | 181 | 1730 | 2.324E-09 | 3491 cysteine-rich, angiogenic inducer, 61                                       |
| GO | extracellular region | 181 | 1730 | 2.324E-09 | 3512 immunoglobulin J polypeptide, linker protein for immunoglobulin alpha       |
| GO | extracellular region | 181 | 1730 | 2.324E-09 | 3569 interleukin 6 (interferon, beta 2)                                          |
| GO | extracellular region | 181 | 1730 | 2.324E-09 | 3570 interleukin 6 receptor                                                      |
| GO | extracellular region | 181 | 1730 | 2.324E-09 | 3601 interleukin 15 receptor, alpha                                              |
| GO | extracellular region | 181 | 1730 | 2.324E-09 | 375790 agrin                                                                     |
| GO | extracellular region | 181 | 1730 | 2.324E-09 | 3814 KiSS-1 metastasis-suppressor                                                |
| GO | extracellular region | 181 | 1730 | 2.324E-09 | 3827 kininogen 1                                                                 |
| GO | extracellular region | 181 | 1730 | 2.324E-09 | 390667 pentraxin 4, long                                                         |
| GO | extracellular region | 181 | 1730 | 2.324E-09 | 3911 laminin, alpha 5                                                            |
| GO | extracellular region | 181 | 1730 | 2.324E-09 | 3913 laminin, beta 2 (laminin S)                                                 |
| GO | extracellular region | 181 | 1730 | 2.324E-09 | 3914 laminin, beta 3                                                             |
| GO | extracellular region | 181 | 1730 | 2.324E-09 | 3959 lectin, galactoside-binding, soluble, 3 binding protein                     |
| GO | extracellular region | 181 | 1730 | 2.324E-09 | 4015 lysyl oxidase                                                               |
| GO | extracellular region | 181 | 1730 | 2.324E-09 | 404203 serine peptidase inhibitor, Kazal type 6                                  |
| GO | extracellular region | 181 | 1730 | 2.324E-09 | 407738 family with sequence similarity 19 (chemokine (C-C motif)-like), member 1 |
| GO | extracellular region | 181 | 1730 | 2.324E-09 | 4246 secretoglobin, family 2A, member 1                                          |
| GO | extracellular region | 181 | 1730 | 2.324E-09 | 4254 KIT ligand                                                                  |
| GO | extracellular region | 181 | 1730 | 2.324E-09 | 4316 matrix metalloproteinase 7 (matrilysin, uterine)                            |
| GO | extracellular region | 181 | 1730 | 2.324E-09 | 4582 mucin 1, cell surface associated                                            |
| GO | extracellular region | 181 | 1730 | 2.324E-09 | 4586 mucin 5AC, oligomeric mucus/gel-forming                                     |
| GO | extracellular region | 181 | 1730 | 2.324E-09 | 4588 mucin 6, oligomeric mucus/gel-forming                                       |
| GO | extracellular region | 181 | 1730 | 2.324E-09 | 4684 neural cell adhesion molecule 1                                             |
| GO | extracellular region | 181 | 1730 | 2.324E-09 | 4856 nephroblastoma overexpressed gene                                           |
| GO | extracellular region | 181 | 1730 | 2.324E-09 | 5046 proprotein convertase subtilisin/kexin type 6                               |
| GO | extracellular region | 181 | 1730 | 2.324E-09 | 50604 interleukin 20                                                             |
| GO | extracellular region | 181 | 1730 | 2.324E-09 | 5066 peptidylglycine alpha-amidating monooxygenase                               |
| GO | extracellular region | 181 | 1730 | 2.324E-09 | 50859 sparc/osteonectin, cwcv and kazal-like domains proteoglycan (testican)     |
| GO | extracellular region | 181 | 1730 | 2.324E-09 | 51279 complement component 1, r subcomponent-like                                |
| GO | extracellular region | 181 | 1730 | 2.324E-09 | 5284 polymeric immunoglobulin receptor                                           |
| GO | extracellular region | 181 | 1730 | 2.324E-09 | 5304 prolactin-induced protein                                                   |
| GO | extracellular region | 181 | 1730 | 2.324E-09 | 5327 plasminogen activator, tissue                                               |
| GO | extracellular region | 181 | 1730 | 2.324E-09 | 5367 pro-melanin-concentrating hormone                                           |

|    |                      |     |      |           |                                                                           |
|----|----------------------|-----|------|-----------|---------------------------------------------------------------------------|
| GO | extracellular region | 181 | 1730 | 2.324E-09 | 54361 wingless-type MMTV integration site family, member 4                |
| GO | extracellular region | 181 | 1730 | 2.324E-09 | 54757 family with sequence similarity 20, member A                        |
| GO | extracellular region | 181 | 1730 | 2.324E-09 | 55068 ecto-NOX disulfide-thiol exchanger 1                                |
| GO | extracellular region | 181 | 1730 | 2.324E-09 | 55600 intelectin 1 (galactofuranose binding)                              |
| GO | extracellular region | 181 | 1730 | 2.324E-09 | 56477 chemokine (C-C motif) ligand 28                                     |
| GO | extracellular region | 181 | 1730 | 2.324E-09 | 5648 mannan-binding lectin serine peptidase 1 (C4/C2 activating component |
| GO | extracellular region | 181 | 1730 | 2.324E-09 | 56547 matrix metallopeptidase 26                                          |
| GO | extracellular region | 181 | 1730 | 2.324E-09 | 5655 kallikrein-related peptidase 10                                      |
| GO | extracellular region | 181 | 1730 | 2.324E-09 | 56944 olfactomedin-like 3                                                 |
| GO | extracellular region | 181 | 1730 | 2.324E-09 | 57094 carboxypeptidase A6                                                 |
| GO | extracellular region | 181 | 1730 | 2.324E-09 | 5737 prostaglandin F receptor (FP)                                        |
| GO | extracellular region | 181 | 1730 | 2.324E-09 | 57493 HEG homolog 1 (zebrafish)                                           |
| GO | extracellular region | 181 | 1730 | 2.324E-09 | 5768 quiescin Q6 sulfhydryl oxidase 1                                     |
| GO | extracellular region | 181 | 1730 | 2.324E-09 | 5950 retinol binding protein 4, plasma                                    |
| GO | extracellular region | 181 | 1730 | 2.324E-09 | 5972 renin                                                                |
| GO | extracellular region | 181 | 1730 | 2.324E-09 | 619518 chromosome 1 open reading frame 191                                |
| GO | extracellular region | 181 | 1730 | 2.324E-09 | 627 brain-derived neurotrophic factor                                     |
| GO | extracellular region | 181 | 1730 | 2.324E-09 | 629 complement factor B                                                   |
| GO | extracellular region | 181 | 1730 | 2.324E-09 | 6343 secretin                                                             |
| GO | extracellular region | 181 | 1730 | 2.324E-09 | 6372 chemokine (C-X-C motif) ligand 6 (granulocyte chemotactic protein 2) |
| GO | extracellular region | 181 | 1730 | 2.324E-09 | 6374 chemokine (C-X-C motif) ligand 5                                     |
| GO | extracellular region | 181 | 1730 | 2.324E-09 | 64093 SPARC related modular calcium binding 1                             |
| GO | extracellular region | 181 | 1730 | 2.324E-09 | 64388 gremlin 2, cysteine knot superfamily, homolog (Xenopus laevis)      |
| GO | extracellular region | 181 | 1730 | 2.324E-09 | 6484 ST3 beta-galactoside alpha-2,3-sialyltransferase 4                   |
| GO | extracellular region | 181 | 1730 | 2.324E-09 | 652 bone morphogenetic protein 4                                          |
| GO | extracellular region | 181 | 1730 | 2.324E-09 | 6590 secretory leukocyte peptidase inhibitor                              |
| GO | extracellular region | 181 | 1730 | 2.324E-09 | 6690 serine peptidase inhibitor, Kazal type 1                             |
| GO | extracellular region | 181 | 1730 | 2.324E-09 | 6692 serine peptidase inhibitor, Kunitz type 1                            |
| GO | extracellular region | 181 | 1730 | 2.324E-09 | 6750 somatostatin                                                         |
| GO | extracellular region | 181 | 1730 | 2.324E-09 | 692094 microseminoprotein, prostate associated                            |
| GO | extracellular region | 181 | 1730 | 2.324E-09 | 6947 transcobalamin I (vitamin B12 binding protein, R binder family)      |
| GO | extracellular region | 181 | 1730 | 2.324E-09 | 6948 transcobalamin II; macrocytic anemia                                 |
| GO | extracellular region | 181 | 1730 | 2.324E-09 | 7032 trefoil factor 2                                                     |
| GO | extracellular region | 181 | 1730 | 2.324E-09 | 7049 transforming growth factor, beta receptor III                        |
| GO | extracellular region | 181 | 1730 | 2.324E-09 | 7076 TIMP metallopeptidase inhibitor 1                                    |
| GO | extracellular region | 181 | 1730 | 2.324E-09 | 7092 tolloid-like 1                                                       |

|    |                      |     |      |           |                                                                               |
|----|----------------------|-----|------|-----------|-------------------------------------------------------------------------------|
| GO | extracellular region | 181 | 1730 | 2.324E-09 | 7133 tumor necrosis factor receptor superfamily, member 1B                    |
| GO | extracellular region | 181 | 1730 | 2.324E-09 | 715 complement component 1, r subcomponent                                    |
| GO | extracellular region | 181 | 1730 | 2.324E-09 | 717 complement component 2                                                    |
| GO | extracellular region | 181 | 1730 | 2.324E-09 | 718 complement component 3                                                    |
| GO | extracellular region | 181 | 1730 | 2.324E-09 | 722 complement component 4 binding protein, alpha                             |
| GO | extracellular region | 181 | 1730 | 2.324E-09 | 725 complement component 4 binding protein, beta                              |
| GO | extracellular region | 181 | 1730 | 2.324E-09 | 731 complement component 8, alpha polypeptide                                 |
| GO | extracellular region | 181 | 1730 | 2.324E-09 | 7474 wingless-type MMTV integration site family, member 5A                    |
| GO | extracellular region | 181 | 1730 | 2.324E-09 | 7477 wingless-type MMTV integration site family, member 7B                    |
| GO | extracellular region | 181 | 1730 | 2.324E-09 | 7869 sema domain, immunoglobulin domain (Ig), short basic domain, secret      |
| GO | extracellular region | 181 | 1730 | 2.324E-09 | 7941 phospholipase A2, group VII (platelet-activating factor acetylhydrolase, |
| GO | extracellular region | 181 | 1730 | 2.324E-09 | 79802 HHIP-like 2                                                             |
| GO | extracellular region | 181 | 1730 | 2.324E-09 | 79887 phospholipase B domain containing 1                                     |
| GO | extracellular region | 181 | 1730 | 2.324E-09 | 79987 sushi, von Willebrand factor type A, EGF and pentraxin domain contain   |
| GO | extracellular region | 181 | 1730 | 2.324E-09 | 8076 microfibrillar associated protein 5                                      |
| GO | extracellular region | 181 | 1730 | 2.324E-09 | 80760 inter-alpha (globulin) inhibitor H5                                     |
| GO | extracellular region | 181 | 1730 | 2.324E-09 | 80763 chromosome 12 open reading frame 39                                     |
| GO | extracellular region | 181 | 1730 | 2.324E-09 | 80830 apolipoprotein L, 6                                                     |
| GO | extracellular region | 181 | 1730 | 2.324E-09 | 80833 apolipoprotein L, 3                                                     |
| GO | extracellular region | 181 | 1730 | 2.324E-09 | 834 caspase 1, apoptosis-related cysteine peptidase (interleukin 1, beta, co  |
| GO | extracellular region | 181 | 1730 | 2.324E-09 | 83872 hemicentin 1                                                            |
| GO | extracellular region | 181 | 1730 | 2.324E-09 | 84171 lysyl oxidase-like 4                                                    |
| GO | extracellular region | 181 | 1730 | 2.324E-09 | 8542 apolipoprotein L, 1                                                      |
| GO | extracellular region | 181 | 1730 | 2.324E-09 | 8600 tumor necrosis factor (ligand) superfamily, member 11                    |
| GO | extracellular region | 181 | 1730 | 2.324E-09 | 8635 ribonuclease T2                                                          |
| GO | extracellular region | 181 | 1730 | 2.324E-09 | 8646 chordin                                                                  |
| GO | extracellular region | 181 | 1730 | 2.324E-09 | 8740 tumor necrosis factor (ligand) superfamily, member 14                    |
| GO | extracellular region | 181 | 1730 | 2.324E-09 | 8839 WNT1 inducible signaling pathway protein 2                               |
| GO | extracellular region | 181 | 1730 | 2.324E-09 | 885 cholecystokinin                                                           |
| GO | extracellular region | 181 | 1730 | 2.324E-09 | 8857 Fc fragment of IgG binding protein                                       |
| GO | extracellular region | 181 | 1730 | 2.324E-09 | 90865 interleukin 33                                                          |
| GO | extracellular region | 181 | 1730 | 2.324E-09 | 92304 secretoglobin, family 3A, member 1                                      |
| GO | extracellular region | 181 | 1730 | 2.324E-09 | 92747 chromosome 20 open reading frame 114                                    |
| GO | extracellular region | 181 | 1730 | 2.324E-09 | 929 CD14 molecule                                                             |
| GO | extracellular region | 181 | 1730 | 2.324E-09 | 94025 mucin 16, cell surface associated                                       |
| GO | extracellular region | 181 | 1730 | 2.324E-09 | 9510 ADAM metallopeptidase with thrombospondin type 1 motif, 1                |

|    |                                     |     |      |           |                                                                                          |
|----|-------------------------------------|-----|------|-----------|------------------------------------------------------------------------------------------|
| GO | extracellular region                | 181 | 1730 | 2.324E-09 | 9518 growth differentiation factor 15                                                    |
| GO | extracellular region                | 181 | 1730 | 2.324E-09 | 9966 tumor necrosis factor (ligand) superfamily, member 15                               |
| GO | response to glucocorticoid stimulus | 17  | 71   | 4.225E-06 | 10076 protein tyrosine phosphatase, receptor type, U                                     |
| GO | response to glucocorticoid stimulus | 17  | 71   | 4.225E-06 | 10081 programmed cell death 7                                                            |
| GO | response to glucocorticoid stimulus | 17  | 71   | 4.225E-06 | 1373 carbamoyl-phosphate synthetase 1, mitochondrial                                     |
| GO | response to glucocorticoid stimulus | 17  | 71   | 4.225E-06 | 1843 dual specificity phosphatase 1                                                      |
| GO | response to glucocorticoid stimulus | 17  | 71   | 4.225E-06 | 2033 E1A binding protein p300                                                            |
| GO | response to glucocorticoid stimulus | 17  | 71   | 4.225E-06 | 35 acyl-Coenzyme A dehydrogenase, C-2 to C-3 short chain                                 |
| GO | response to glucocorticoid stimulus | 17  | 71   | 4.225E-06 | 3569 interleukin 6 (interferon, beta 2)                                                  |
| GO | response to glucocorticoid stimulus | 17  | 71   | 4.225E-06 | 3570 interleukin 6 receptor                                                              |
| GO | response to glucocorticoid stimulus | 17  | 71   | 4.225E-06 | 3643 insulin receptor                                                                    |
| GO | response to glucocorticoid stimulus | 17  | 71   | 4.225E-06 | 3845 v-Ki-ras2 Kirsten rat sarcoma viral oncogene homolog                                |
| GO | response to glucocorticoid stimulus | 17  | 71   | 4.225E-06 | 5122 proprotein convertase subtilisin/kexin type 1                                       |
| GO | response to glucocorticoid stimulus | 17  | 71   | 4.225E-06 | 5244 ATP-binding cassette, sub-family B (MDR/TAP), member 4                              |
| GO | response to glucocorticoid stimulus | 17  | 71   | 4.225E-06 | 5327 plasminogen activator, tissue                                                       |
| GO | response to glucocorticoid stimulus | 17  | 71   | 4.225E-06 | 6256 retinoid X receptor, alpha                                                          |
| GO | response to glucocorticoid stimulus | 17  | 71   | 4.225E-06 | 652 bone morphogenetic protein 4                                                         |
| GO | response to glucocorticoid stimulus | 17  | 71   | 4.225E-06 | 799 calcitonin receptor                                                                  |
| GO | response to glucocorticoid stimulus | 17  | 71   | 4.225E-06 | 9021 suppressor of cytokine signaling 3                                                  |
| GO | integral to plasma membrane         | 103 | 969  | 4.39E-06  | 10076 protein tyrosine phosphatase, receptor type, U                                     |
| GO | integral to plasma membrane         | 103 | 969  | 4.39E-06  | 10268 receptor (G protein-coupled) activity modifying protein 3                          |
| GO | integral to plasma membrane         | 103 | 969  | 4.39E-06  | 10288 leukocyte immunoglobulin-like receptor, subfamily B (with TM and ITIM              |
| GO | integral to plasma membrane         | 103 | 969  | 4.39E-06  | 10312 T-cell, immune regulator 1, ATPase, H <sup>+</sup> transporting, lysosomal VO subu |
| GO | integral to plasma membrane         | 103 | 969  | 4.39E-06  | 1048 carcinoembryonic antigen-related cell adhesion molecule 5                           |
| GO | integral to plasma membrane         | 103 | 969  | 4.39E-06  | 10568 solute carrier family 34 (sodium phosphate), member 2                              |
| GO | integral to plasma membrane         | 103 | 969  | 4.39E-06  | 1364 claudin 4                                                                           |
| GO | integral to plasma membrane         | 103 | 969  | 4.39E-06  | 154 adrenergic, beta-2-, receptor, surface                                               |
| GO | integral to plasma membrane         | 103 | 969  | 4.39E-06  | 1604 CD55 molecule, decay accelerating factor for complement (Cromer blo                 |
| GO | integral to plasma membrane         | 103 | 969  | 4.39E-06  | 166929 sphingomyelin synthase 2                                                          |
| GO | integral to plasma membrane         | 103 | 969  | 4.39E-06  | 1813 dopamine receptor D2                                                                |
| GO | integral to plasma membrane         | 103 | 969  | 4.39E-06  | 1815 dopamine receptor D4                                                                |
| GO | integral to plasma membrane         | 103 | 969  | 4.39E-06  | 1839 heparin-binding EGF-like growth factor                                              |
| GO | integral to plasma membrane         | 103 | 969  | 4.39E-06  | 1902 lysophosphatidic acid receptor 1                                                    |
| GO | integral to plasma membrane         | 103 | 969  | 4.39E-06  | 1948 ephrin-B2                                                                           |
| GO | integral to plasma membrane         | 103 | 969  | 4.39E-06  | 1969 EPH receptor A2                                                                     |
| GO | integral to plasma membrane         | 103 | 969  | 4.39E-06  | 2015 egf-like module containing, mucin-like, hormone receptor-like 1                     |

|    |                             |     |     |          |                                                                            |
|----|-----------------------------|-----|-----|----------|----------------------------------------------------------------------------|
| GO | integral to plasma membrane | 103 | 969 | 4.39E-06 | 2040 stomatin                                                              |
| GO | integral to plasma membrane | 103 | 969 | 4.39E-06 | 2044 EPH receptor A5                                                       |
| GO | integral to plasma membrane | 103 | 969 | 4.39E-06 | 2205 Fc fragment of IgE, high affinity I, receptor for; alpha polypeptide  |
| GO | integral to plasma membrane | 103 | 969 | 4.39E-06 | 2239 glypican 4                                                            |
| GO | integral to plasma membrane | 103 | 969 | 4.39E-06 | 2262 glypican 5                                                            |
| GO | integral to plasma membrane | 103 | 969 | 4.39E-06 | 22925 phospholipase A2 receptor 1, 180kDa                                  |
| GO | integral to plasma membrane | 103 | 969 | 4.39E-06 | 23208 synaptotagmin XI                                                     |
| GO | integral to plasma membrane | 103 | 969 | 4.39E-06 | 23767 fibronectin leucine rich transmembrane protein 3                     |
| GO | integral to plasma membrane | 103 | 969 | 4.39E-06 | 2564 gamma-aminobutyric acid (GABA) A receptor, epsilon                    |
| GO | integral to plasma membrane | 103 | 969 | 4.39E-06 | 2615 leucine rich repeat containing 32                                     |
| GO | integral to plasma membrane | 103 | 969 | 4.39E-06 | 27345 potassium large conductance calcium-activated channel, subfamily M,  |
| GO | integral to plasma membrane | 103 | 969 | 4.39E-06 | 2861 G protein-coupled receptor 37 (endothelin receptor type B-like)       |
| GO | integral to plasma membrane | 103 | 969 | 4.39E-06 | 286133 scavenger receptor class A, member 5 (putative)                     |
| GO | integral to plasma membrane | 103 | 969 | 4.39E-06 | 2865 free fatty acid receptor 3                                            |
| GO | integral to plasma membrane | 103 | 969 | 4.39E-06 | 2867 free fatty acid receptor 2                                            |
| GO | integral to plasma membrane | 103 | 969 | 4.39E-06 | 28982 feline leukemia virus subgroup C cellular receptor 1                 |
| GO | integral to plasma membrane | 103 | 969 | 4.39E-06 | 2911 glutamate receptor, metabotropic 1                                    |
| GO | integral to plasma membrane | 103 | 969 | 4.39E-06 | 3355 5-hydroxytryptamine (serotonin) receptor 1F                           |
| GO | integral to plasma membrane | 103 | 969 | 4.39E-06 | 3561 interleukin 2 receptor, gamma (severe combined immunodeficiency)      |
| GO | integral to plasma membrane | 103 | 969 | 4.39E-06 | 358 aquaporin 1 (Colton blood group)                                       |
| GO | integral to plasma membrane | 103 | 969 | 4.39E-06 | 3604 tumor necrosis factor receptor superfamily, member 9                  |
| GO | integral to plasma membrane | 103 | 969 | 4.39E-06 | 3643 insulin receptor                                                      |
| GO | integral to plasma membrane | 103 | 969 | 4.39E-06 | 3732 CD82 molecule                                                         |
| GO | integral to plasma membrane | 103 | 969 | 4.39E-06 | 3759 potassium inwardly-rectifying channel, subfamily J, member 2          |
| GO | integral to plasma membrane | 103 | 969 | 4.39E-06 | 3949 low density lipoprotein receptor                                      |
| GO | integral to plasma membrane | 103 | 969 | 4.39E-06 | 4065 lymphocyte antigen 75                                                 |
| GO | integral to plasma membrane | 103 | 969 | 4.39E-06 | 4179 CD46 molecule, complement regulatory protein                          |
| GO | integral to plasma membrane | 103 | 969 | 4.39E-06 | 4359 myelin protein zero                                                   |
| GO | integral to plasma membrane | 103 | 969 | 4.39E-06 | 4486 macrophage stimulating 1 receptor (c-met-related tyrosine kinase)     |
| GO | integral to plasma membrane | 103 | 969 | 4.39E-06 | 4582 mucin 1, cell surface associated                                      |
| GO | integral to plasma membrane | 103 | 969 | 4.39E-06 | 4680 carcinoembryonic antigen-related cell adhesion molecule 6 (non-specif |
| GO | integral to plasma membrane | 103 | 969 | 4.39E-06 | 4853 Notch homolog 2 (Drosophila)                                          |
| GO | integral to plasma membrane | 103 | 969 | 4.39E-06 | 4886 neuropeptide Y receptor Y1                                            |
| GO | integral to plasma membrane | 103 | 969 | 4.39E-06 | 4889 neuropeptide Y receptor Y5                                            |
| GO | integral to plasma membrane | 103 | 969 | 4.39E-06 | 4915 neurotrophic tyrosine kinase, receptor, type 2                        |
| GO | integral to plasma membrane | 103 | 969 | 4.39E-06 | 493 ATPase, Ca <sup>++</sup> transporting, plasma membrane 4               |

|                                |     |     |          |                                                                                       |
|--------------------------------|-----|-----|----------|---------------------------------------------------------------------------------------|
| GO integral to plasma membrane | 103 | 969 | 4.39E-06 | 5025 purinergic receptor P2X, ligand-gated ion channel, 4                             |
| GO integral to plasma membrane | 103 | 969 | 4.39E-06 | 5099 protocadherin 7                                                                  |
| GO integral to plasma membrane | 103 | 969 | 4.39E-06 | 51280 golgi membrane protein 1                                                        |
| GO integral to plasma membrane | 103 | 969 | 4.39E-06 | 5244 ATP-binding cassette, sub-family B (MDR/TAP), member 4                           |
| GO integral to plasma membrane | 103 | 969 | 4.39E-06 | 5284 polymeric immunoglobulin receptor                                                |
| GO integral to plasma membrane | 103 | 969 | 4.39E-06 | 5349 FXYD domain containing ion transport regulator 3                                 |
| GO integral to plasma membrane | 103 | 969 | 4.39E-06 | 55867 solute carrier family 22 (organic anion/urate transporter), member 11           |
| GO integral to plasma membrane | 103 | 969 | 4.39E-06 | 56172 ankylosis, progressive homolog (mouse)                                          |
| GO integral to plasma membrane | 103 | 969 | 4.39E-06 | 5724 platelet-activating factor receptor                                              |
| GO integral to plasma membrane | 103 | 969 | 4.39E-06 | 5732 prostaglandin E receptor 2 (subtype EP2), 53kDa                                  |
| GO integral to plasma membrane | 103 | 969 | 4.39E-06 | 5737 prostaglandin F receptor (FP)                                                    |
| GO integral to plasma membrane | 103 | 969 | 4.39E-06 | 5787 protein tyrosine phosphatase, receptor type, B                                   |
| GO integral to plasma membrane | 103 | 969 | 4.39E-06 | 5789 protein tyrosine phosphatase, receptor type, D                                   |
| GO integral to plasma membrane | 103 | 969 | 4.39E-06 | 5794 protein tyrosine phosphatase, receptor type, H                                   |
| GO integral to plasma membrane | 103 | 969 | 4.39E-06 | 5799 protein tyrosine phosphatase, receptor type, N polypeptide 2                     |
| GO integral to plasma membrane | 103 | 969 | 4.39E-06 | 6006 Rh blood group, CcEe antigens                                                    |
| GO integral to plasma membrane | 103 | 969 | 4.39E-06 | 6402 selectin L                                                                       |
| GO integral to plasma membrane | 103 | 969 | 4.39E-06 | 6505 solute carrier family 1 (neuronal/epithelial high affinity glutamate transp      |
| GO integral to plasma membrane | 103 | 969 | 4.39E-06 | 6521 solute carrier family 4, anion exchanger, member 1 (erythrocyte memb             |
| GO integral to plasma membrane | 103 | 969 | 4.39E-06 | 6535 solute carrier family 6 (neurotransmitter transporter, creatine), memb           |
| GO integral to plasma membrane | 103 | 969 | 4.39E-06 | 6542 solute carrier family 7 (cationic amino acid transporter, $\gamma^+$ system), me |
| GO integral to plasma membrane | 103 | 969 | 4.39E-06 | 6563 solute carrier family 14 (urea transporter), member 1 (Kidd blood group)         |
| GO integral to plasma membrane | 103 | 969 | 4.39E-06 | 6564 solute carrier family 15 (oligopeptide transporter), member 1                    |
| GO integral to plasma membrane | 103 | 969 | 4.39E-06 | 6565 solute carrier family 15 (H <sup>+</sup> /peptide transporter), member 2         |
| GO integral to plasma membrane | 103 | 969 | 4.39E-06 | 6653 sortilin-related receptor, L(DLR class) A repeats-containing                     |
| GO integral to plasma membrane | 103 | 969 | 4.39E-06 | 6751 somatostatin receptor 1                                                          |
| GO integral to plasma membrane | 103 | 969 | 4.39E-06 | 684 bone marrow stromal cell antigen 2                                                |
| GO integral to plasma membrane | 103 | 969 | 4.39E-06 | 7049 transforming growth factor, beta receptor III                                    |
| GO integral to plasma membrane | 103 | 969 | 4.39E-06 | 7097 toll-like receptor 2                                                             |
| GO integral to plasma membrane | 103 | 969 | 4.39E-06 | 7098 toll-like receptor 3                                                             |
| GO integral to plasma membrane | 103 | 969 | 4.39E-06 | 7099 toll-like receptor 4                                                             |
| GO integral to plasma membrane | 103 | 969 | 4.39E-06 | 7102 tetraspanin 7                                                                    |
| GO integral to plasma membrane | 103 | 969 | 4.39E-06 | 7106 tetraspanin 4                                                                    |
| GO integral to plasma membrane | 103 | 969 | 4.39E-06 | 783 calcium channel, voltage-dependent, beta 2 subunit                                |
| GO integral to plasma membrane | 103 | 969 | 4.39E-06 | 799 calcitonin receptor                                                               |
| GO integral to plasma membrane | 103 | 969 | 4.39E-06 | 8082 sarcospan (Kras oncogene-associated gene)                                        |



|                                |     |     |           |                                                                             |
|--------------------------------|-----|-----|-----------|-----------------------------------------------------------------------------|
| GO integral to plasma membrane | 103 | 969 | 4.39E-06  | 8600 tumor necrosis factor (ligand) superfamily, member 11                  |
| GO integral to plasma membrane | 103 | 969 | 4.39E-06  | 8645 potassium channel, subfamily K, member 5                               |
| GO integral to plasma membrane | 103 | 969 | 4.39E-06  | 8671 solute carrier family 4, sodium bicarbonate cotransporter, member 4    |
| GO integral to plasma membrane | 103 | 969 | 4.39E-06  | 8794 tumor necrosis factor receptor superfamily, member 10c, decoy withou   |
| GO integral to plasma membrane | 103 | 969 | 4.39E-06  | 8842 prominin 1                                                             |
| GO integral to plasma membrane | 103 | 969 | 4.39E-06  | 9019 myelin protein zero-like 1                                             |
| GO integral to plasma membrane | 103 | 969 | 4.39E-06  | 91 activin A receptor, type IB                                              |
| GO integral to plasma membrane | 103 | 969 | 4.39E-06  | 9143 synaptogyrin 3                                                         |
| GO integral to plasma membrane | 103 | 969 | 4.39E-06  | 9194 solute carrier family 16, member 7 (monocarboxylic acid transporter 2) |
| GO integral to plasma membrane | 103 | 969 | 4.39E-06  | 94 activin A receptor type II-like 1                                        |
| GO integral to plasma membrane | 103 | 969 | 4.39E-06  | 961 CD47 molecule                                                           |
| GO integral to plasma membrane | 103 | 969 | 4.39E-06  | 9619 ATP-binding cassette, sub-family G (WHITE), member 1                   |
| GO integral to plasma membrane | 103 | 969 | 4.39E-06  | 9962 solute carrier family 23 (nucleobase transporters), member 2           |
| GO integral to plasma membrane | 103 | 969 | 4.39E-06  | 9966 tumor necrosis factor (ligand) superfamily, member 15                  |
| GO extracellular space         | 75  | 647 | 4.613E-06 | 10439 olfactomedin 1                                                        |
| GO extracellular space         | 75  | 647 | 4.613E-06 | 1117 chitinase 3-like 2                                                     |
| GO extracellular space         | 75  | 647 | 4.613E-06 | 11202 kallikrein-related peptidase 8                                        |
| GO extracellular space         | 75  | 647 | 4.613E-06 | 1435 colony stimulating factor 1 (macrophage)                               |
| GO extracellular space         | 75  | 647 | 4.613E-06 | 1471 cystatin C                                                             |
| GO extracellular space         | 75  | 647 | 4.613E-06 | 1508 cathepsin B                                                            |
| GO extracellular space         | 75  | 647 | 4.613E-06 | 168667 BMP binding endothelial regulator                                    |
| GO extracellular space         | 75  | 647 | 4.613E-06 | 183 angiotensinogen (serpin peptidase inhibitor, clade A, member 8)         |
| GO extracellular space         | 75  | 647 | 4.613E-06 | 1839 heparin-binding EGF-like growth factor                                 |
| GO extracellular space         | 75  | 647 | 4.613E-06 | 1906 endothelin 1                                                           |
| GO extracellular space         | 75  | 647 | 4.613E-06 | 2200 fibrillin 1                                                            |
| GO extracellular space         | 75  | 647 | 4.613E-06 | 2239 glypican 4                                                             |
| GO extracellular space         | 75  | 647 | 4.613E-06 | 2262 glypican 5                                                             |
| GO extracellular space         | 75  | 647 | 4.613E-06 | 22901 arylsulfatase G                                                       |
| GO extracellular space         | 75  | 647 | 4.613E-06 | 22925 phospholipase A2 receptor 1, 180kDa                                   |
| GO extracellular space         | 75  | 647 | 4.613E-06 | 23145 SCO-spondin homolog (Bos taurus)                                      |
| GO extracellular space         | 75  | 647 | 4.613E-06 | 23529 cardiotrophin-like cytokine factor 1                                  |
| GO extracellular space         | 75  | 647 | 4.613E-06 | 255738 proprotein convertase subtilisin/kexin type 9                        |
| GO extracellular space         | 75  | 647 | 4.613E-06 | 2638 group-specific component (vitamin D binding protein)                   |
| GO extracellular space         | 75  | 647 | 4.613E-06 | 27123 dickkopf homolog 2 (Xenopus laevis)                                   |
| GO extracellular space         | 75  | 647 | 4.613E-06 | 2921 chemokine (C-X-C motif) ligand 3                                       |
| GO extracellular space         | 75  | 647 | 4.613E-06 | 3373 hyaluronoglucosaminidase 1                                             |

|    |                     |    |     |           |                                                                           |
|----|---------------------|----|-----|-----------|---------------------------------------------------------------------------|
| GO | extracellular space | 75 | 647 | 4.613E-06 | 3479 insulin-like growth factor 1 (somatomedin C)                         |
| GO | extracellular space | 75 | 647 | 4.613E-06 | 3484 insulin-like growth factor binding protein 1                         |
| GO | extracellular space | 75 | 647 | 4.613E-06 | 3486 insulin-like growth factor binding protein 3                         |
| GO | extracellular space | 75 | 647 | 4.613E-06 | 3569 interleukin 6 (interferon, beta 2)                                   |
| GO | extracellular space | 75 | 647 | 4.613E-06 | 3570 interleukin 6 receptor                                               |
| GO | extracellular space | 75 | 647 | 4.613E-06 | 3601 interleukin 15 receptor, alpha                                       |
| GO | extracellular space | 75 | 647 | 4.613E-06 | 375790 agrin                                                              |
| GO | extracellular space | 75 | 647 | 4.613E-06 | 3815 v-kit Hardy-Zuckerman 4 feline sarcoma viral oncogene homolog        |
| GO | extracellular space | 75 | 647 | 4.613E-06 | 3827 kininogen 1                                                          |
| GO | extracellular space | 75 | 647 | 4.613E-06 | 3911 laminin, alpha 5                                                     |
| GO | extracellular space | 75 | 647 | 4.613E-06 | 3959 lectin, galactoside-binding, soluble, 3 binding protein              |
| GO | extracellular space | 75 | 647 | 4.613E-06 | 4015 lysyl oxidase                                                        |
| GO | extracellular space | 75 | 647 | 4.613E-06 | 4254 KIT ligand                                                           |
| GO | extracellular space | 75 | 647 | 4.613E-06 | 4316 matrix metalloproteinase 7 (matrilysin, uterine)                     |
| GO | extracellular space | 75 | 647 | 4.613E-06 | 5046 proprotein convertase subtilisin/kexin type 6                        |
| GO | extracellular space | 75 | 647 | 4.613E-06 | 50604 interleukin 20                                                      |
| GO | extracellular space | 75 | 647 | 4.613E-06 | 5122 proprotein convertase subtilisin/kexin type 1                        |
| GO | extracellular space | 75 | 647 | 4.613E-06 | 51279 complement component 1, r subcomponent-like                         |
| GO | extracellular space | 75 | 647 | 4.613E-06 | 5327 plasminogen activator, tissue                                        |
| GO | extracellular space | 75 | 647 | 4.613E-06 | 5367 pro-melanin-concentrating hormone                                    |
| GO | extracellular space | 75 | 647 | 4.613E-06 | 55068 ecto-NOX disulfide-thiol exchanger 1                                |
| GO | extracellular space | 75 | 647 | 4.613E-06 | 56477 chemokine (C-C motif) ligand 28                                     |
| GO | extracellular space | 75 | 647 | 4.613E-06 | 5648 mannan-binding lectin serine peptidase 1 (C4/C2 activating component |
| GO | extracellular space | 75 | 647 | 4.613E-06 | 5768 quiescin Q6 sulfhydryl oxidase 1                                     |
| GO | extracellular space | 75 | 647 | 4.613E-06 | 5950 retinol binding protein 4, plasma                                    |
| GO | extracellular space | 75 | 647 | 4.613E-06 | 5972 renin                                                                |
| GO | extracellular space | 75 | 647 | 4.613E-06 | 6372 chemokine (C-X-C motif) ligand 6 (granulocyte chemotactic protein 2) |
| GO | extracellular space | 75 | 647 | 4.613E-06 | 6374 chemokine (C-X-C motif) ligand 5                                     |
| GO | extracellular space | 75 | 647 | 4.613E-06 | 64388 gremlin 2, cysteine knot superfamily, homolog (Xenopus laevis)      |
| GO | extracellular space | 75 | 647 | 4.613E-06 | 652 bone morphogenetic protein 4                                          |
| GO | extracellular space | 75 | 647 | 4.613E-06 | 6750 somatostatin                                                         |
| GO | extracellular space | 75 | 647 | 4.613E-06 | 6948 transcobalamin II; macrocytic anemia                                 |
| GO | extracellular space | 75 | 647 | 4.613E-06 | 7049 transforming growth factor, beta receptor III                        |
| GO | extracellular space | 75 | 647 | 4.613E-06 | 717 complement component 2                                                |
| GO | extracellular space | 75 | 647 | 4.613E-06 | 718 complement component 3                                                |
| GO | extracellular space | 75 | 647 | 4.613E-06 | 731 complement component 8, alpha polypeptide                             |

|                                          |    |     |           |                                                                               |
|------------------------------------------|----|-----|-----------|-------------------------------------------------------------------------------|
| GO extracellular space                   | 75 | 647 | 4.613E-06 | 7474 wingless-type MMTV integration site family, member 5A                    |
| GO extracellular space                   | 75 | 647 | 4.613E-06 | 760 carbonic anhydrase II                                                     |
| GO extracellular space                   | 75 | 647 | 4.613E-06 | 7941 phospholipase A2, group VII (platelet-activating factor acetylhydrolase, |
| GO extracellular space                   | 75 | 647 | 4.613E-06 | 84171 lysyl oxidase-like 4                                                    |
| GO extracellular space                   | 75 | 647 | 4.613E-06 | 8542 apolipoprotein L, 1                                                      |
| GO extracellular space                   | 75 | 647 | 4.613E-06 | 8600 tumor necrosis factor (ligand) superfamily, member 11                    |
| GO extracellular space                   | 75 | 647 | 4.613E-06 | 8646 chordin                                                                  |
| GO extracellular space                   | 75 | 647 | 4.613E-06 | 8740 tumor necrosis factor (ligand) superfamily, member 14                    |
| GO extracellular space                   | 75 | 647 | 4.613E-06 | 8744 tumor necrosis factor (ligand) superfamily, member 9                     |
| GO extracellular space                   | 75 | 647 | 4.613E-06 | 885 cholecystokinin                                                           |
| GO extracellular space                   | 75 | 647 | 4.613E-06 | 90865 interleukin 33                                                          |
| GO extracellular space                   | 75 | 647 | 4.613E-06 | 92304 secretoglobulin, family 3A, member 1                                    |
| GO extracellular space                   | 75 | 647 | 4.613E-06 | 92747 chromosome 20 open reading frame 114                                    |
| GO extracellular space                   | 75 | 647 | 4.613E-06 | 929 CD14 molecule                                                             |
| GO extracellular space                   | 75 | 647 | 4.613E-06 | 94025 mucin 16, cell surface associated                                       |
| GO extracellular space                   | 75 | 647 | 4.613E-06 | 9518 growth differentiation factor 15                                         |
| GO extracellular space                   | 75 | 647 | 4.613E-06 | 9966 tumor necrosis factor (ligand) superfamily, member 15                    |
| GO complement activation, classical path | 10 | 27  | 6.184E-06 | 1380 complement component (3d/Epstein Barr virus) receptor 2                  |
| GO complement activation, classical path | 10 | 27  | 6.184E-06 | 1604 CD55 molecule, decay accelerating factor for complement (Cromer blo      |
| GO complement activation, classical path | 10 | 27  | 6.184E-06 | 4179 CD46 molecule, complement regulatory protein                             |
| GO complement activation, classical path | 10 | 27  | 6.184E-06 | 51279 complement component 1, r subcomponent-like                             |
| GO complement activation, classical path | 10 | 27  | 6.184E-06 | 715 complement component 1, r subcomponent                                    |
| GO complement activation, classical path | 10 | 27  | 6.184E-06 | 717 complement component 2                                                    |
| GO complement activation, classical path | 10 | 27  | 6.184E-06 | 718 complement component 3                                                    |
| GO complement activation, classical path | 10 | 27  | 6.184E-06 | 722 complement component 4 binding protein, alpha                             |
| GO complement activation, classical path | 10 | 27  | 6.184E-06 | 725 complement component 4 binding protein, beta                              |
| GO complement activation, classical path | 10 | 27  | 6.184E-06 | 731 complement component 8, alpha polypeptide                                 |
| GO cell surface                          | 33 | 214 | 9.221E-06 | 1803 dipeptidyl-peptidase 4                                                   |
| GO cell surface                          | 33 | 214 | 9.221E-06 | 1839 heparin-binding EGF-like growth factor                                   |
| GO cell surface                          | 33 | 214 | 9.221E-06 | 1902 lysophosphatidic acid receptor 1                                         |
| GO cell surface                          | 33 | 214 | 9.221E-06 | 222545 G protein-coupled receptor, family C, group 6, member A                |
| GO cell surface                          | 33 | 214 | 9.221E-06 | 2263 fibroblast growth factor receptor 2                                      |
| GO cell surface                          | 33 | 214 | 9.221E-06 | 2526 fucosyltransferase 4 (alpha (1,3) fucosyltransferase, myeloid-specific)  |
| GO cell surface                          | 33 | 214 | 9.221E-06 | 25825 beta-site APP-cleaving enzyme 2                                         |
| GO cell surface                          | 33 | 214 | 9.221E-06 | 286133 scavenger receptor class A, member 5 (putative)                        |
| GO cell surface                          | 33 | 214 | 9.221E-06 | 3192 heterogeneous nuclear ribonucleoprotein U (scaffold attachment facto     |

|    |                                          |    |     |           |                                                                     |
|----|------------------------------------------|----|-----|-----------|---------------------------------------------------------------------|
| GO | cell surface                             | 33 | 214 | 9.221E-06 | 3306 heat shock 70kDa protein 2                                     |
| GO | cell surface                             | 33 | 214 | 9.221E-06 | 3570 interleukin 6 receptor                                         |
| GO | cell surface                             | 33 | 214 | 9.221E-06 | 375790 agrin                                                        |
| GO | cell surface                             | 33 | 214 | 9.221E-06 | 4853 Notch homolog 2 (Drosophila)                                   |
| GO | cell surface                             | 33 | 214 | 9.221E-06 | 5046 proprotein convertase subtilisin/kexin type 6                  |
| GO | cell surface                             | 33 | 214 | 9.221E-06 | 50937 Cdon homolog (mouse)                                          |
| GO | cell surface                             | 33 | 214 | 9.221E-06 | 51754 transmembrane protein 8B                                      |
| GO | cell surface                             | 33 | 214 | 9.221E-06 | 5243 ATP-binding cassette, sub-family B (MDR/TAP), member 1         |
| GO | cell surface                             | 33 | 214 | 9.221E-06 | 5327 plasminogen activator, tissue                                  |
| GO | cell surface                             | 33 | 214 | 9.221E-06 | 57453 Down syndrome cell adhesion molecule like 1                   |
| GO | cell surface                             | 33 | 214 | 9.221E-06 | 5801 protein tyrosine phosphatase, receptor type, R                 |
| GO | cell surface                             | 33 | 214 | 9.221E-06 | 64127 nucleotide-binding oligomerization domain containing 2        |
| GO | cell surface                             | 33 | 214 | 9.221E-06 | 6710 spectrin, beta, erythrocytic                                   |
| GO | cell surface                             | 33 | 214 | 9.221E-06 | 7049 transforming growth factor, beta receptor III                  |
| GO | cell surface                             | 33 | 214 | 9.221E-06 | 7097 toll-like receptor 2                                           |
| GO | cell surface                             | 33 | 214 | 9.221E-06 | 7098 toll-like receptor 3                                           |
| GO | cell surface                             | 33 | 214 | 9.221E-06 | 7852 chemokine (C-X-C motif) receptor 4                             |
| GO | cell surface                             | 33 | 214 | 9.221E-06 | 84059 G protein-coupled receptor 98                                 |
| GO | cell surface                             | 33 | 214 | 9.221E-06 | 8406 sushi-repeat-containing protein, X-linked                      |
| GO | cell surface                             | 33 | 214 | 9.221E-06 | 8839 WNT1 inducible signaling pathway protein 2                     |
| GO | cell surface                             | 33 | 214 | 9.221E-06 | 8842 prominin 1                                                     |
| GO | cell surface                             | 33 | 214 | 9.221E-06 | 91 activin A receptor, type IB                                      |
| GO | cell surface                             | 33 | 214 | 9.221E-06 | 94 activin A receptor type II-like 1                                |
| GO | cell surface                             | 33 | 214 | 9.221E-06 | 952 CD38 molecule                                                   |
| GO | negative regulation of cell proliferatic | 39 | 287 | 3.088E-05 | 10076 protein tyrosine phosphatase, receptor type, U                |
| GO | negative regulation of cell proliferatic | 39 | 287 | 3.088E-05 | 10140 transducer of ERBB2, 1                                        |
| GO | negative regulation of cell proliferatic | 39 | 287 | 3.088E-05 | 10252 sprouty homolog 1, antagonist of FGF signaling (Drosophila)   |
| GO | negative regulation of cell proliferatic | 39 | 287 | 3.088E-05 | 10253 sprouty homolog 2 (Drosophila)                                |
| GO | negative regulation of cell proliferatic | 39 | 287 | 3.088E-05 | 10766 transducer of ERBB2, 2                                        |
| GO | negative regulation of cell proliferatic | 39 | 287 | 3.088E-05 | 1741 discs, large homolog 3 (Drosophila)                            |
| GO | negative regulation of cell proliferatic | 39 | 287 | 3.088E-05 | 1813 dopamine receptor D2                                           |
| GO | negative regulation of cell proliferatic | 39 | 287 | 3.088E-05 | 183 angiotensinogen (serpin peptidase inhibitor, clade A, member 8) |
| GO | negative regulation of cell proliferatic | 39 | 287 | 3.088E-05 | 23371 tensin like C1 domain containing phosphatase (tensin 2)       |
| GO | negative regulation of cell proliferatic | 39 | 287 | 3.088E-05 | 2737 GLI family zinc finger 3                                       |
| GO | negative regulation of cell proliferatic | 39 | 287 | 3.088E-05 | 3373 hyaluronoglucosaminidase 1                                     |
| GO | negative regulation of cell proliferatic | 39 | 287 | 3.088E-05 | 3479 insulin-like growth factor 1 (somatomedin C)                   |

|    |                                         |    |     |           |                                                                                |
|----|-----------------------------------------|----|-----|-----------|--------------------------------------------------------------------------------|
| GO | negative regulation of cell proliferati | 39 | 287 | 3.088E-05 | 3486 insulin-like growth factor binding protein 3                              |
| GO | negative regulation of cell proliferati | 39 | 287 | 3.088E-05 | 3569 interleukin 6 (interferon, beta 2)                                        |
| GO | negative regulation of cell proliferati | 39 | 287 | 3.088E-05 | 3604 tumor necrosis factor receptor superfamily, member 9                      |
| GO | negative regulation of cell proliferati | 39 | 287 | 3.088E-05 | 3725 jun oncogene                                                              |
| GO | negative regulation of cell proliferati | 39 | 287 | 3.088E-05 | 4087 SMAD family member 2                                                      |
| GO | negative regulation of cell proliferati | 39 | 287 | 3.088E-05 | 4194 Mdm4 p53 binding protein homolog (mouse)                                  |
| GO | negative regulation of cell proliferati | 39 | 287 | 3.088E-05 | 4692 necdin homolog (mouse)                                                    |
| GO | negative regulation of cell proliferati | 39 | 287 | 3.088E-05 | 4853 Notch homolog 2 (Drosophila)                                              |
| GO | negative regulation of cell proliferati | 39 | 287 | 3.088E-05 | 5371 promyelocytic leukemia                                                    |
| GO | negative regulation of cell proliferati | 39 | 287 | 3.088E-05 | 5920 retinoic acid receptor responder (tazarotene induced) 3                   |
| GO | negative regulation of cell proliferati | 39 | 287 | 3.088E-05 | 604 B-cell CLL/lymphoma 6                                                      |
| GO | negative regulation of cell proliferati | 39 | 287 | 3.088E-05 | 6256 retinoid X receptor, alpha                                                |
| GO | negative regulation of cell proliferati | 39 | 287 | 3.088E-05 | 652 bone morphogenetic protein 4                                               |
| GO | negative regulation of cell proliferati | 39 | 287 | 3.088E-05 | 6750 somatostatin                                                              |
| GO | negative regulation of cell proliferati | 39 | 287 | 3.088E-05 | 6751 somatostatin receptor 1                                                   |
| GO | negative regulation of cell proliferati | 39 | 287 | 3.088E-05 | 7071 Kruppel-like factor 10                                                    |
| GO | negative regulation of cell proliferati | 39 | 287 | 3.088E-05 | 8313 axin 2                                                                    |
| GO | negative regulation of cell proliferati | 39 | 287 | 3.088E-05 | 83595 SRY (sex determining region Y)-box 7                                     |
| GO | negative regulation of cell proliferati | 39 | 287 | 3.088E-05 | 8462 Kruppel-like factor 11                                                    |
| GO | negative regulation of cell proliferati | 39 | 287 | 3.088E-05 | 85004 RAS-like, estrogen-regulated, growth inhibitor                           |
| GO | negative regulation of cell proliferati | 39 | 287 | 3.088E-05 | 8519 interferon induced transmembrane protein 1 (9-27)                         |
| GO | negative regulation of cell proliferati | 39 | 287 | 3.088E-05 | 85477 scinderin                                                                |
| GO | negative regulation of cell proliferati | 39 | 287 | 3.088E-05 | 8839 WNT1 inducible signaling pathway protein 2                                |
| GO | negative regulation of cell proliferati | 39 | 287 | 3.088E-05 | 9314 Kruppel-like factor 4 (gut)                                               |
| GO | negative regulation of cell proliferati | 39 | 287 | 3.088E-05 | 94 activin A receptor type II-like 1                                           |
| GO | negative regulation of cell proliferati | 39 | 287 | 3.088E-05 | 9510 ADAM metalloproteinase with thrombospondin type 1 motif, 1                |
| GO | negative regulation of cell proliferati | 39 | 287 | 3.088E-05 | 9537 tumor protein p53 inducible protein 11                                    |
| GO | sequence-specific DNA binding           | 57 | 487 | 4.83E-05  | 10481 homeobox B13                                                             |
| GO | sequence-specific DNA binding           | 57 | 487 | 4.83E-05  | 116071 basic leucine zipper transcription factor, ATF-like 2                   |
| GO | sequence-specific DNA binding           | 57 | 487 | 4.83E-05  | 116113 forkhead box P4                                                         |
| GO | sequence-specific DNA binding           | 57 | 487 | 4.83E-05  | 127343 diencephalon/mesencephalon homeobox 1                                   |
| GO | sequence-specific DNA binding           | 57 | 487 | 4.83E-05  | 158800 RhoX homeobox family, member 1                                          |
| GO | sequence-specific DNA binding           | 57 | 487 | 4.83E-05  | 1628 D site of albumin promoter (albumin D-box) binding protein                |
| GO | sequence-specific DNA binding           | 57 | 487 | 4.83E-05  | 1958 early growth response 1                                                   |
| GO | sequence-specific DNA binding           | 57 | 487 | 4.83E-05  | 1999 E74-like factor 3 (ets domain transcription factor, epithelial-specific ) |
| GO | sequence-specific DNA binding           | 57 | 487 | 4.83E-05  | 2114 v-ets erythroblastosis virus E26 oncogene homolog 2 (avian)               |

|    |                               |    |     |          |                                                             |
|----|-------------------------------|----|-----|----------|-------------------------------------------------------------|
| GO | sequence-specific DNA binding | 57 | 487 | 4.83E-05 | 2115 ets variant 1                                          |
| GO | sequence-specific DNA binding | 57 | 487 | 4.83E-05 | 2117 ets variant 3                                          |
| GO | sequence-specific DNA binding | 57 | 487 | 4.83E-05 | 2290 forkhead box G1                                        |
| GO | sequence-specific DNA binding | 57 | 487 | 4.83E-05 | 2296 forkhead box C1                                        |
| GO | sequence-specific DNA binding | 57 | 487 | 4.83E-05 | 2303 forkhead box C2 (MFH-1, mesenchyme forkhead 1)         |
| GO | sequence-specific DNA binding | 57 | 487 | 4.83E-05 | 2306 forkhead box D2                                        |
| GO | sequence-specific DNA binding | 57 | 487 | 4.83E-05 | 2354 FBJ murine osteosarcoma viral oncogene homolog B       |
| GO | sequence-specific DNA binding | 57 | 487 | 4.83E-05 | 2624 GATA binding protein 2                                 |
| GO | sequence-specific DNA binding | 57 | 487 | 4.83E-05 | 26468 LIM homeobox 6                                        |
| GO | sequence-specific DNA binding | 57 | 487 | 4.83E-05 | 2737 GLI family zinc finger 3                               |
| GO | sequence-specific DNA binding | 57 | 487 | 4.83E-05 | 3131 hepatic leukemia factor                                |
| GO | sequence-specific DNA binding | 57 | 487 | 4.83E-05 | 3142 H2.0-like homeobox                                     |
| GO | sequence-specific DNA binding | 57 | 487 | 4.83E-05 | 3164 nuclear receptor subfamily 4, group A, member 1        |
| GO | sequence-specific DNA binding | 57 | 487 | 4.83E-05 | 3175 one cut homeobox 1                                     |
| GO | sequence-specific DNA binding | 57 | 487 | 4.83E-05 | 3659 interferon regulatory factor 1                         |
| GO | sequence-specific DNA binding | 57 | 487 | 4.83E-05 | 3726 jun B proto-oncogene                                   |
| GO | sequence-specific DNA binding | 57 | 487 | 4.83E-05 | 4209 myocyte enhancer factor 2D                             |
| GO | sequence-specific DNA binding | 57 | 487 | 4.83E-05 | 4212 Meis homeobox 2                                        |
| GO | sequence-specific DNA binding | 57 | 487 | 4.83E-05 | 4223 mesenchyme homeobox 2                                  |
| GO | sequence-specific DNA binding | 57 | 487 | 4.83E-05 | 429 achaete-scute complex homolog 1 (Drosophila)            |
| GO | sequence-specific DNA binding | 57 | 487 | 4.83E-05 | 4306 nuclear receptor subfamily 3, group C, member 2        |
| GO | sequence-specific DNA binding | 57 | 487 | 4.83E-05 | 467 activating transcription factor 3                       |
| GO | sequence-specific DNA binding | 57 | 487 | 4.83E-05 | 4778 nuclear factor (erythroid-derived 2), 45kDa            |
| GO | sequence-specific DNA binding | 57 | 487 | 4.83E-05 | 4783 nuclear factor, interleukin 3 regulated                |
| GO | sequence-specific DNA binding | 57 | 487 | 4.83E-05 | 4802 nuclear transcription factor Y, gamma                  |
| GO | sequence-specific DNA binding | 57 | 487 | 4.83E-05 | 4851 Notch homolog 1, translocation-associated (Drosophila) |
| GO | sequence-specific DNA binding | 57 | 487 | 4.83E-05 | 4929 nuclear receptor subfamily 4, group A, member 2        |
| GO | sequence-specific DNA binding | 57 | 487 | 4.83E-05 | 5307 paired-like homeodomain 1                              |
| GO | sequence-specific DNA binding | 57 | 487 | 4.83E-05 | 5308 paired-like homeodomain 2                              |
| GO | sequence-specific DNA binding | 57 | 487 | 4.83E-05 | 5396 paired related homeobox 1                              |
| GO | sequence-specific DNA binding | 57 | 487 | 4.83E-05 | 5460 POU class 5 homeobox 1                                 |
| GO | sequence-specific DNA binding | 57 | 487 | 4.83E-05 | 5463 POU class 6 homeobox 1                                 |
| GO | sequence-specific DNA binding | 57 | 487 | 4.83E-05 | 5465 peroxisome proliferator-activated receptor alpha       |
| GO | sequence-specific DNA binding | 57 | 487 | 4.83E-05 | 55810 forkhead box J2                                       |
| GO | sequence-specific DNA binding | 57 | 487 | 4.83E-05 | 57459 GATA zinc finger domain containing 2B                 |
| GO | sequence-specific DNA binding | 57 | 487 | 4.83E-05 | 57594 homeobox and leucine zipper encoding                  |

|    |                               |    |     |           |                                                                                |
|----|-------------------------------|----|-----|-----------|--------------------------------------------------------------------------------|
| GO | sequence-specific DNA binding | 57 | 487 | 4.83E-05  | 604 B-cell CLL/lymphoma 6                                                      |
| GO | sequence-specific DNA binding | 57 | 487 | 4.83E-05  | 6096 RAR-related orphan receptor B                                             |
| GO | sequence-specific DNA binding | 57 | 487 | 4.83E-05  | 6097 RAR-related orphan receptor C                                             |
| GO | sequence-specific DNA binding | 57 | 487 | 4.83E-05  | 6778 signal transducer and activator of transcription 6, interleukin-4 inducer |
| GO | sequence-specific DNA binding | 57 | 487 | 4.83E-05  | 7008 thyrotrophic embryonic factor                                             |
| GO | sequence-specific DNA binding | 57 | 487 | 4.83E-05  | 7227 trichorhinophalangeal syndrome I                                          |
| GO | sequence-specific DNA binding | 57 | 487 | 4.83E-05  | 8013 nuclear receptor subfamily 4, group A, member 3                           |
| GO | sequence-specific DNA binding | 57 | 487 | 4.83E-05  | 80714 pre-B-cell leukemia homeobox 4                                           |
| GO | sequence-specific DNA binding | 57 | 487 | 4.83E-05  | 90993 cAMP responsive element binding protein 3-like 1                         |
| GO | sequence-specific DNA binding | 57 | 487 | 4.83E-05  | 9572 nuclear receptor subfamily 1, group D, member 1                           |
| GO | sequence-specific DNA binding | 57 | 487 | 4.83E-05  | 9935 v-maf musculoaponeurotic fibrosarcoma oncogene homolog B (avian)          |
| GO | sequence-specific DNA binding | 57 | 487 | 4.83E-05  | 9971 nuclear receptor subfamily 1, group H, member 4                           |
| GO | transcription factor activity | 94 | 922 | 5.829E-05 | 10346 tripartite motif-containing 22                                           |
| GO | transcription factor activity | 94 | 922 | 5.829E-05 | 10481 homeobox B13                                                             |
| GO | transcription factor activity | 94 | 922 | 5.829E-05 | 116071 basic leucine zipper transcription factor, ATF-like 2                   |
| GO | transcription factor activity | 94 | 922 | 5.829E-05 | 116113 forkhead box P4                                                         |
| GO | transcription factor activity | 94 | 922 | 5.829E-05 | 127343 diencephalon/mesencephalon homeobox 1                                   |
| GO | transcription factor activity | 94 | 922 | 5.829E-05 | 158800 RhoX homeobox family, member 1                                          |
| GO | transcription factor activity | 94 | 922 | 5.829E-05 | 1628 D site of albumin promoter (albumin D-box) binding protein                |
| GO | transcription factor activity | 94 | 922 | 5.829E-05 | 1820 AT rich interactive domain 3A (BRIGHT-like)                               |
| GO | transcription factor activity | 94 | 922 | 5.829E-05 | 1958 early growth response 1                                                   |
| GO | transcription factor activity | 94 | 922 | 5.829E-05 | 1959 early growth response 2                                                   |
| GO | transcription factor activity | 94 | 922 | 5.829E-05 | 1960 early growth response 3                                                   |
| GO | transcription factor activity | 94 | 922 | 5.829E-05 | 1999 E74-like factor 3 (ets domain transcription factor, epithelial-specific ) |
| GO | transcription factor activity | 94 | 922 | 5.829E-05 | 2033 E1A binding protein p300                                                  |
| GO | transcription factor activity | 94 | 922 | 5.829E-05 | 2114 v-ets erythroblastosis virus E26 oncogene homolog 2 (avian)               |
| GO | transcription factor activity | 94 | 922 | 5.829E-05 | 2115 ets variant 1                                                             |
| GO | transcription factor activity | 94 | 922 | 5.829E-05 | 2117 ets variant 3                                                             |
| GO | transcription factor activity | 94 | 922 | 5.829E-05 | 2122 MDS1 and EVI1 complex locus                                               |
| GO | transcription factor activity | 94 | 922 | 5.829E-05 | 2290 forkhead box G1                                                           |
| GO | transcription factor activity | 94 | 922 | 5.829E-05 | 2296 forkhead box C1                                                           |
| GO | transcription factor activity | 94 | 922 | 5.829E-05 | 2303 forkhead box C2 (MFH-1, mesenchyme forkhead 1)                            |
| GO | transcription factor activity | 94 | 922 | 5.829E-05 | 2306 forkhead box D2                                                           |
| GO | transcription factor activity | 94 | 922 | 5.829E-05 | 2353 FBJ murine osteosarcoma viral oncogene homolog                            |
| GO | transcription factor activity | 94 | 922 | 5.829E-05 | 2354 FBJ murine osteosarcoma viral oncogene homolog B                          |
| GO | transcription factor activity | 94 | 922 | 5.829E-05 | 23650 tripartite motif-containing 29                                           |

|                                  |    |     |           |                                                                               |
|----------------------------------|----|-----|-----------|-------------------------------------------------------------------------------|
| GO transcription factor activity | 94 | 922 | 5.829E-05 | 2624 GATA binding protein 2                                                   |
| GO transcription factor activity | 94 | 922 | 5.829E-05 | 26468 LIM homeobox 6                                                          |
| GO transcription factor activity | 94 | 922 | 5.829E-05 | 2737 GLI family zinc finger 3                                                 |
| GO transcription factor activity | 94 | 922 | 5.829E-05 | 3131 hepatic leukemia factor                                                  |
| GO transcription factor activity | 94 | 922 | 5.829E-05 | 3142 H2.0-like homeobox                                                       |
| GO transcription factor activity | 94 | 922 | 5.829E-05 | 3164 nuclear receptor subfamily 4, group A, member 1                          |
| GO transcription factor activity | 94 | 922 | 5.829E-05 | 3169 forkhead box A1                                                          |
| GO transcription factor activity | 94 | 922 | 5.829E-05 | 3175 one cut homeobox 1                                                       |
| GO transcription factor activity | 94 | 922 | 5.829E-05 | 3659 interferon regulatory factor 1                                           |
| GO transcription factor activity | 94 | 922 | 5.829E-05 | 3665 interferon regulatory factor 7                                           |
| GO transcription factor activity | 94 | 922 | 5.829E-05 | 3725 jun oncogene                                                             |
| GO transcription factor activity | 94 | 922 | 5.829E-05 | 3726 jun B proto-oncogene                                                     |
| GO transcription factor activity | 94 | 922 | 5.829E-05 | 4087 SMAD family member 2                                                     |
| GO transcription factor activity | 94 | 922 | 5.829E-05 | 4209 myocyte enhancer factor 2D                                               |
| GO transcription factor activity | 94 | 922 | 5.829E-05 | 4212 Meis homeobox 2                                                          |
| GO transcription factor activity | 94 | 922 | 5.829E-05 | 4223 mesenchyme homeobox 2                                                    |
| GO transcription factor activity | 94 | 922 | 5.829E-05 | 429 achaete-scute complex homolog 1 (Drosophila)                              |
| GO transcription factor activity | 94 | 922 | 5.829E-05 | 4306 nuclear receptor subfamily 3, group C, member 2                          |
| GO transcription factor activity | 94 | 922 | 5.829E-05 | 4613 v-myc myelocytomatosis viral related oncogene, neuroblastoma derive      |
| GO transcription factor activity | 94 | 922 | 5.829E-05 | 467 activating transcription factor 3                                         |
| GO transcription factor activity | 94 | 922 | 5.829E-05 | 4778 nuclear factor (erythroid-derived 2), 45kDa                              |
| GO transcription factor activity | 94 | 922 | 5.829E-05 | 4783 nuclear factor, interleukin 3 regulated                                  |
| GO transcription factor activity | 94 | 922 | 5.829E-05 | 4784 nuclear factor I/X (CCAAT-binding transcription factor)                  |
| GO transcription factor activity | 94 | 922 | 5.829E-05 | 4791 nuclear factor of kappa light polypeptide gene enhancer in B-cells 2 (p4 |
| GO transcription factor activity | 94 | 922 | 5.829E-05 | 4802 nuclear transcription factor Y, gamma                                    |
| GO transcription factor activity | 94 | 922 | 5.829E-05 | 4851 Notch homolog 1, translocation-associated (Drosophila)                   |
| GO transcription factor activity | 94 | 922 | 5.829E-05 | 4929 nuclear receptor subfamily 4, group A, member 2                          |
| GO transcription factor activity | 94 | 922 | 5.829E-05 | 51085 MLX interacting protein-like                                            |
| GO transcription factor activity | 94 | 922 | 5.829E-05 | 51274 Kruppel-like factor 3 (basic)                                           |
| GO transcription factor activity | 94 | 922 | 5.829E-05 | 5307 paired-like homeodomain 1                                                |
| GO transcription factor activity | 94 | 922 | 5.829E-05 | 5308 paired-like homeodomain 2                                                |
| GO transcription factor activity | 94 | 922 | 5.829E-05 | 5396 paired related homeobox 1                                                |
| GO transcription factor activity | 94 | 922 | 5.829E-05 | 5460 POU class 5 homeobox 1                                                   |
| GO transcription factor activity | 94 | 922 | 5.829E-05 | 5463 POU class 6 homeobox 1                                                   |
| GO transcription factor activity | 94 | 922 | 5.829E-05 | 5465 peroxisome proliferator-activated receptor alpha                         |
| GO transcription factor activity | 94 | 922 | 5.829E-05 | 55769 zinc finger protein 83                                                  |



|                                   |    |     |           |                                                                                  |
|-----------------------------------|----|-----|-----------|----------------------------------------------------------------------------------|
| GO transcription factor activity  | 94 | 922 | 5.829E-05 | 55810 forkhead box J2                                                            |
| GO transcription factor activity  | 94 | 922 | 5.829E-05 | 57459 GATA zinc finger domain containing 2B                                      |
| GO transcription factor activity  | 94 | 922 | 5.829E-05 | 57594 homeobox and leucine zipper encoding                                       |
| GO transcription factor activity  | 94 | 922 | 5.829E-05 | 604 B-cell CLL/lymphoma 6                                                        |
| GO transcription factor activity  | 94 | 922 | 5.829E-05 | 6096 RAR-related orphan receptor B                                               |
| GO transcription factor activity  | 94 | 922 | 5.829E-05 | 6097 RAR-related orphan receptor C                                               |
| GO transcription factor activity  | 94 | 922 | 5.829E-05 | 6256 retinoid X receptor, alpha                                                  |
| GO transcription factor activity  | 94 | 922 | 5.829E-05 | 64651 cysteine-serine-rich nuclear protein 1                                     |
| GO transcription factor activity  | 94 | 922 | 5.829E-05 | 6778 signal transducer and activator of transcription 6, interleukin-4 inducible |
| GO transcription factor activity  | 94 | 922 | 5.829E-05 | 687 Kruppel-like factor 9                                                        |
| GO transcription factor activity  | 94 | 922 | 5.829E-05 | 6941 transcription factor 19                                                     |
| GO transcription factor activity  | 94 | 922 | 5.829E-05 | 7008 thyrotrophic embryonic factor                                               |
| GO transcription factor activity  | 94 | 922 | 5.829E-05 | 7022 transcription factor AP-2 gamma (activating enhancer binding protein 2)     |
| GO transcription factor activity  | 94 | 922 | 5.829E-05 | 7026 nuclear receptor subfamily 2, group F, member 2                             |
| GO transcription factor activity  | 94 | 922 | 5.829E-05 | 7071 Kruppel-like factor 10                                                      |
| GO transcription factor activity  | 94 | 922 | 5.829E-05 | 7227 trichorhinophalangeal syndrome I                                            |
| GO transcription factor activity  | 94 | 922 | 5.829E-05 | 7597 zinc finger and BTB domain containing 25                                    |
| GO transcription factor activity  | 94 | 922 | 5.829E-05 | 7706 tripartite motif-containing 25                                              |
| GO transcription factor activity  | 94 | 922 | 5.829E-05 | 8013 nuclear receptor subfamily 4, group A, member 3                             |
| GO transcription factor activity  | 94 | 922 | 5.829E-05 | 80714 pre-B-cell leukemia homeobox 4                                             |
| GO transcription factor activity  | 94 | 922 | 5.829E-05 | 83595 SRY (sex determining region Y)-box 7                                       |
| GO transcription factor activity  | 94 | 922 | 5.829E-05 | 84124 zinc finger protein 394                                                    |
| GO transcription factor activity  | 94 | 922 | 5.829E-05 | 8462 Kruppel-like factor 11                                                      |
| GO transcription factor activity  | 94 | 922 | 5.829E-05 | 8531 cold shock domain protein A                                                 |
| GO transcription factor activity  | 94 | 922 | 5.829E-05 | 8543 LIM domain only 4                                                           |
| GO transcription factor activity  | 94 | 922 | 5.829E-05 | 8553 basic helix-loop-helix family, member e40                                   |
| GO transcription factor activity  | 94 | 922 | 5.829E-05 | 862 runt-related transcription factor 1; translocated to, 1 (cyclin D-related)   |
| GO transcription factor activity  | 94 | 922 | 5.829E-05 | 8848 TSC22 domain family, member 1                                               |
| GO transcription factor activity  | 94 | 922 | 5.829E-05 | 90993 cAMP responsive element binding protein 3-like 1                           |
| GO transcription factor activity  | 94 | 922 | 5.829E-05 | 9314 Kruppel-like factor 4 (gut)                                                 |
| GO transcription factor activity  | 94 | 922 | 5.829E-05 | 9496 T-box 4                                                                     |
| GO transcription factor activity  | 94 | 922 | 5.829E-05 | 9572 nuclear receptor subfamily 1, group D, member 1                             |
| GO transcription factor activity  | 94 | 922 | 5.829E-05 | 9935 v-maf musculoaponeurotic fibrosarcoma oncogene homolog B (avian)            |
| GO transcription factor activity  | 94 | 922 | 5.829E-05 | 9971 nuclear receptor subfamily 1, group H, member 4                             |
| GO response to lipopolysaccharide | 19 | 105 | 8.238E-05 | 10221 tribbles homolog 1 (Drosophila)                                            |
| GO response to lipopolysaccharide | 19 | 105 | 8.238E-05 | 11213 interleukin-1 receptor-associated kinase 3                                 |

|                                            |    |     |           |                                                                               |
|--------------------------------------------|----|-----|-----------|-------------------------------------------------------------------------------|
| GO response to lipopolysaccharide          | 19 | 105 | 8.238E-05 | 1373 carbamoyl-phosphate synthetase 1, mitochondrial                          |
| GO response to lipopolysaccharide          | 19 | 105 | 8.238E-05 | 2353 FBJ murine osteosarcoma viral oncogene homolog                           |
| GO response to lipopolysaccharide          | 19 | 105 | 8.238E-05 | 3570 interleukin 6 receptor                                                   |
| GO response to lipopolysaccharide          | 19 | 105 | 8.238E-05 | 3587 interleukin 10 receptor, alpha                                           |
| GO response to lipopolysaccharide          | 19 | 105 | 8.238E-05 | 3725 jun oncogene                                                             |
| GO response to lipopolysaccharide          | 19 | 105 | 8.238E-05 | 4129 monoamine oxidase B                                                      |
| GO response to lipopolysaccharide          | 19 | 105 | 8.238E-05 | 4792 nuclear factor of kappa light polypeptide gene enhancer in B-cells inhib |
| GO response to lipopolysaccharide          | 19 | 105 | 8.238E-05 | 5122 proprotein convertase subtilisin/kexin type 1                            |
| GO response to lipopolysaccharide          | 19 | 105 | 8.238E-05 | 5724 platelet-activating factor receptor                                      |
| GO response to lipopolysaccharide          | 19 | 105 | 8.238E-05 | 64127 nucleotide-binding oligomerization domain containing 2                  |
| GO response to lipopolysaccharide          | 19 | 105 | 8.238E-05 | 6622 synuclein, alpha (non A4 component of amyloid precursor)                 |
| GO response to lipopolysaccharide          | 19 | 105 | 8.238E-05 | 7001 peroxiredoxin 2                                                          |
| GO response to lipopolysaccharide          | 19 | 105 | 8.238E-05 | 7097 toll-like receptor 2                                                     |
| GO response to lipopolysaccharide          | 19 | 105 | 8.238E-05 | 7099 toll-like receptor 4                                                     |
| GO response to lipopolysaccharide          | 19 | 105 | 8.238E-05 | 834 caspase 1, apoptosis-related cysteine peptidase (interleukin 1, beta, co  |
| GO response to lipopolysaccharide          | 19 | 105 | 8.238E-05 | 9021 suppressor of cytokine signaling 3                                       |
| GO response to lipopolysaccharide          | 19 | 105 | 8.238E-05 | 9971 nuclear receptor subfamily 1, group H, member 4                          |
| GO response to protein stimulus            | 11 | 42  | 8.679E-05 | 1508 cathepsin B                                                              |
| GO response to protein stimulus            | 11 | 42  | 8.679E-05 | 1958 early growth response 1                                                  |
| GO response to protein stimulus            | 11 | 42  | 8.679E-05 | 2033 E1A binding protein p300                                                 |
| GO response to protein stimulus            | 11 | 42  | 8.679E-05 | 2353 FBJ murine osteosarcoma viral oncogene homolog                           |
| GO response to protein stimulus            | 11 | 42  | 8.679E-05 | 3491 cysteine-rich, angiogenic inducer, 61                                    |
| GO response to protein stimulus            | 11 | 42  | 8.679E-05 | 3643 insulin receptor                                                         |
| GO response to protein stimulus            | 11 | 42  | 8.679E-05 | 4929 nuclear receptor subfamily 4, group A, member 2                          |
| GO response to protein stimulus            | 11 | 42  | 8.679E-05 | 5122 proprotein convertase subtilisin/kexin type 1                            |
| GO response to protein stimulus            | 11 | 42  | 8.679E-05 | 56923 neuromedin U receptor 2                                                 |
| GO response to protein stimulus            | 11 | 42  | 8.679E-05 | 7071 Kruppel-like factor 10                                                   |
| GO response to protein stimulus            | 11 | 42  | 8.679E-05 | 7706 tripartite motif-containing 25                                           |
| GO positive regulation of peptidyl-tyrosin | 11 | 42  | 8.679E-05 | 183 angiotensinogen (serpin peptidase inhibitor, clade A, member 8)           |
| GO positive regulation of peptidyl-tyrosin | 11 | 42  | 8.679E-05 | 2205 Fc fragment of IgE, high affinity I, receptor for; alpha polypeptide     |
| GO positive regulation of peptidyl-tyrosin | 11 | 42  | 8.679E-05 | 3479 insulin-like growth factor 1 (somatomedin C)                             |
| GO positive regulation of peptidyl-tyrosin | 11 | 42  | 8.679E-05 | 3569 interleukin 6 (interferon, beta 2)                                       |
| GO positive regulation of peptidyl-tyrosin | 11 | 42  | 8.679E-05 | 3570 interleukin 6 receptor                                                   |
| GO positive regulation of peptidyl-tyrosin | 11 | 42  | 8.679E-05 | 3678 integrin, alpha 5 (fibronectin receptor, alpha polypeptide)              |
| GO positive regulation of peptidyl-tyrosin | 11 | 42  | 8.679E-05 | 4254 KIT ligand                                                               |
| GO positive regulation of peptidyl-tyrosin | 11 | 42  | 8.679E-05 | 64127 nucleotide-binding oligomerization domain containing 2                  |

|    |                                         |     |      |           |                                                                                    |
|----|-----------------------------------------|-----|------|-----------|------------------------------------------------------------------------------------|
| GO | positive regulation of peptidyl-tyrosin | 11  | 42   | 8.679E-05 | 6850 spleen tyrosine kinase                                                        |
| GO | positive regulation of peptidyl-tyrosin | 11  | 42   | 8.679E-05 | 7099 toll-like receptor 4                                                          |
| GO | positive regulation of peptidyl-tyrosin | 11  | 42   | 8.679E-05 | 885 cholecystokinin                                                                |
| GO | membrane                                | 302 | 3643 | 8.688E-05 | 10008 potassium voltage-gated channel, Isk-related family, member 3                |
| GO | membrane                                | 302 | 3643 | 8.688E-05 | 10090 uronyl-2-sulfotransferase                                                    |
| GO | membrane                                | 302 | 3643 | 8.688E-05 | 10103 tetraspanin 1                                                                |
| GO | membrane                                | 302 | 3643 | 8.688E-05 | 10158 PDZK1 interacting protein 1                                                  |
| GO | membrane                                | 302 | 3643 | 8.688E-05 | 10162 lysophosphatidylcholine acyltransferase 3                                    |
| GO | membrane                                | 302 | 3643 | 8.688E-05 | 10170 dehydrogenase/reductase (SDR family) member 9                                |
| GO | membrane                                | 302 | 3643 | 8.688E-05 | 10205 myelin protein zero-like 2                                                   |
| GO | membrane                                | 302 | 3643 | 8.688E-05 | 10282 blocked early in transport 1 homolog ( <i>S. cerevisiae</i> )                |
| GO | membrane                                | 302 | 3643 | 8.688E-05 | 10317 UDP-Gal:betaGlcNAc beta 1,3-galactosyltransferase, polypeptide 5             |
| GO | membrane                                | 302 | 3643 | 8.688E-05 | 10335 murine retrovirus integration site 1 homolog                                 |
| GO | membrane                                | 302 | 3643 | 8.688E-05 | 10384 butyrophilin, subfamily 3, member A3                                         |
| GO | membrane                                | 302 | 3643 | 8.688E-05 | 10435 CDC42 effector protein (Rho GTPase binding) 2                                |
| GO | membrane                                | 302 | 3643 | 8.688E-05 | 10568 solute carrier family 34 (sodium phosphate), member 2                        |
| GO | membrane                                | 302 | 3643 | 8.688E-05 | 1080 cystic fibrosis transmembrane conductance regulator (ATP-binding cas:         |
| GO | membrane                                | 302 | 3643 | 8.688E-05 | 10826 chromosome 5 open reading frame 4                                            |
| GO | membrane                                | 302 | 3643 | 8.688E-05 | 10913 ectodysplasin A receptor                                                     |
| GO | membrane                                | 302 | 3643 | 8.688E-05 | 1124 chimerin (chimaerin) 2                                                        |
| GO | membrane                                | 302 | 3643 | 8.688E-05 | 112574 sorting nexin 18                                                            |
| GO | membrane                                | 302 | 3643 | 8.688E-05 | 11273 ataxin 2-like                                                                |
| GO | membrane                                | 302 | 3643 | 8.688E-05 | 11322 transmembrane channel-like 6                                                 |
| GO | membrane                                | 302 | 3643 | 8.688E-05 | 113278 chromosome 20 open reading frame 54                                         |
| GO | membrane                                | 302 | 3643 | 8.688E-05 | 115273 RAB42, member RAS oncogene family                                           |
| GO | membrane                                | 302 | 3643 | 8.688E-05 | 116844 leucine-rich alpha-2-glycoprotein 1                                         |
| GO | membrane                                | 302 | 3643 | 8.688E-05 | 1193 chloride intracellular channel 2                                              |
| GO | membrane                                | 302 | 3643 | 8.688E-05 | 119467 clarin 3                                                                    |
| GO | membrane                                | 302 | 3643 | 8.688E-05 | 120224 transmembrane protein 45B                                                   |
| GO | membrane                                | 302 | 3643 | 8.688E-05 | 121227 leucine-rich repeats and immunoglobulin-like domains 3                      |
| GO | membrane                                | 302 | 3643 | 8.688E-05 | 121665 signal peptide peptidase 3                                                  |
| GO | membrane                                | 302 | 3643 | 8.688E-05 | 123096 solute carrier family 25, member 29                                         |
| GO | membrane                                | 302 | 3643 | 8.688E-05 | 123099 degenerative spermatocyte homolog 2, lipid desaturase ( <i>Drosophila</i> ) |
| GO | membrane                                | 302 | 3643 | 8.688E-05 | 127707 kelch domain containing 7A                                                  |
| GO | membrane                                | 302 | 3643 | 8.688E-05 | 127845 golgi transport 1 homolog A ( <i>S. cerevisiae</i> )                        |
| GO | membrane                                | 302 | 3643 | 8.688E-05 | 130367 sphingosine-1-phosphate phosphatase 2                                       |

|             |     |      |           |                                                                               |
|-------------|-----|------|-----------|-------------------------------------------------------------------------------|
| GO membrane | 302 | 3643 | 8.688E-05 | 130399 activin A receptor, type IC                                            |
| GO membrane | 302 | 3643 | 8.688E-05 | 137994 leucine zipper-EF-hand containing transmembrane protein 2              |
| GO membrane | 302 | 3643 | 8.688E-05 | 143098 membrane protein, palmitoylated 7 (MAGUK p55 subfamily member 7        |
| GO membrane | 302 | 3643 | 8.688E-05 | 143425 synaptotagmin IX                                                       |
| GO membrane | 302 | 3643 | 8.688E-05 | 1435 colony stimulating factor 1 (macrophage)                                 |
| GO membrane | 302 | 3643 | 8.688E-05 | 144132 dynein heavy chain domain 1                                            |
| GO membrane | 302 | 3643 | 8.688E-05 | 145581 leucine rich repeat and fibronectin type III domain containing 5       |
| GO membrane | 302 | 3643 | 8.688E-05 | 147138 transmembrane channel-like 8                                           |
| GO membrane | 302 | 3643 | 8.688E-05 | 147798 transmembrane channel-like 4                                           |
| GO membrane | 302 | 3643 | 8.688E-05 | 148170 CDC42 effector protein (Rho GTPase binding) 5                          |
| GO membrane | 302 | 3643 | 8.688E-05 | 148229 ATPase, class I, type 8B, member 3                                     |
| GO membrane | 302 | 3643 | 8.688E-05 | 154043 CNKSR family member 3                                                  |
| GO membrane | 302 | 3643 | 8.688E-05 | 154141 membrane bound O-acyltransferase domain containing 1                   |
| GO membrane | 302 | 3643 | 8.688E-05 | 154214 ring finger protein 217                                                |
| GO membrane | 302 | 3643 | 8.688E-05 | 155006 transmembrane protein 213                                              |
| GO membrane | 302 | 3643 | 8.688E-05 | 1558 cytochrome P450, family 2, subfamily C, polypeptide 8                    |
| GO membrane | 302 | 3643 | 8.688E-05 | 1559 cytochrome P450, family 2, subfamily C, polypeptide 9                    |
| GO membrane | 302 | 3643 | 8.688E-05 | 1571 cytochrome P450, family 2, subfamily E, polypeptide 1                    |
| GO membrane | 302 | 3643 | 8.688E-05 | 157506 retinol dehydrogenase 10 (all-trans)                                   |
| GO membrane | 302 | 3643 | 8.688E-05 | 1577 cytochrome P450, family 3, subfamily A, polypeptide 5                    |
| GO membrane | 302 | 3643 | 8.688E-05 | 157855 potassium channel, subfamily U, member 1                               |
| GO membrane | 302 | 3643 | 8.688E-05 | 158038 leucine rich repeat and Ig domain containing 2                         |
| GO membrane | 302 | 3643 | 8.688E-05 | 160518 DENN/MADD domain containing 5B                                         |
| GO membrane | 302 | 3643 | 8.688E-05 | 163590 torsin A interacting protein 2                                         |
| GO membrane | 302 | 3643 | 8.688E-05 | 165679 chromosome 3 open reading frame 57                                     |
| GO membrane | 302 | 3643 | 8.688E-05 | 1755 deleted in malignant brain tumors 1                                      |
| GO membrane | 302 | 3643 | 8.688E-05 | 1815 dopamine receptor D4                                                     |
| GO membrane | 302 | 3643 | 8.688E-05 | 192134 UDP-GlcNAc:betaGal beta-1,3-N-acetylglucosaminyltransferase 6 (core    |
| GO membrane | 302 | 3643 | 8.688E-05 | 195814 short chain dehydrogenase/reductase family 16C, member 5               |
| GO membrane | 302 | 3643 | 8.688E-05 | 200150 phospholipase D family, member 5                                       |
| GO membrane | 302 | 3643 | 8.688E-05 | 2013 epithelial membrane protein 2                                            |
| GO membrane | 302 | 3643 | 8.688E-05 | 201895 chromosome 4 open reading frame 34                                     |
| GO membrane | 302 | 3643 | 8.688E-05 | 2044 EPH receptor A5                                                          |
| GO membrane | 302 | 3643 | 8.688E-05 | 204962 solute carrier family 44, member 5                                     |
| GO membrane | 302 | 3643 | 8.688E-05 | 2055 ceroid-lipofuscinosis, neuronal 8 (epilepsy, progressive with mental ret |
| GO membrane | 302 | 3643 | 8.688E-05 | 2182 acyl-CoA synthetase long-chain family member 4                           |

|             |     |      |           |        |                                                                                                    |
|-------------|-----|------|-----------|--------|----------------------------------------------------------------------------------------------------|
| GO membrane | 302 | 3643 | 8.688E-05 | 219623 | transmembrane protein 26                                                                           |
| GO membrane | 302 | 3643 | 8.688E-05 | 221303 | family with sequence similarity 162, member B                                                      |
| GO membrane | 302 | 3643 | 8.688E-05 | 222223 | KIAA1324-like                                                                                      |
| GO membrane | 302 | 3643 | 8.688E-05 | 223117 | sema domain, immunoglobulin domain (Ig), short basic domain, secreted                              |
| GO membrane | 302 | 3643 | 8.688E-05 | 2263   | fibroblast growth factor receptor 2                                                                |
| GO membrane | 302 | 3643 | 8.688E-05 | 22795  | nidogen 2 (osteonidogen)                                                                           |
| GO membrane | 302 | 3643 | 8.688E-05 | 23035  | PH domain and leucine rich repeat protein phosphatase 2                                            |
| GO membrane | 302 | 3643 | 8.688E-05 | 23151  | GRAM domain containing 4                                                                           |
| GO membrane | 302 | 3643 | 8.688E-05 | 23208  | synaptotagmin XI                                                                                   |
| GO membrane | 302 | 3643 | 8.688E-05 | 23348  | dedicator of cytokinesis 9                                                                         |
| GO membrane | 302 | 3643 | 8.688E-05 | 23365  | Rho guanine nucleotide exchange factor (GEF) 12                                                    |
| GO membrane | 302 | 3643 | 8.688E-05 | 23654  | plexin B2                                                                                          |
| GO membrane | 302 | 3643 | 8.688E-05 | 23767  | fibronectin leucine rich transmembrane protein 3                                                   |
| GO membrane | 302 | 3643 | 8.688E-05 | 240    | arachidonate 5-lipoxygenase                                                                        |
| GO membrane | 302 | 3643 | 8.688E-05 | 2525   | fucosyltransferase 3 (galactoside 3(4)-L-fucosyltransferase, Lewis blood group antigen synthetase) |
| GO membrane | 302 | 3643 | 8.688E-05 | 2526   | fucosyltransferase 4 (alpha (1,3) fucosyltransferase, myeloid-specific)                            |
| GO membrane | 302 | 3643 | 8.688E-05 | 255104 | transmembrane and coiled-coil domains 4                                                            |
| GO membrane | 302 | 3643 | 8.688E-05 | 255488 | ring finger protein 144B                                                                           |
| GO membrane | 302 | 3643 | 8.688E-05 | 255743 | nephronectin                                                                                       |
| GO membrane | 302 | 3643 | 8.688E-05 | 256987 | serine incorporator 5                                                                              |
| GO membrane | 302 | 3643 | 8.688E-05 | 257019 | FERM domain containing 3                                                                           |
| GO membrane | 302 | 3643 | 8.688E-05 | 25825  | beta-site APP-cleaving enzyme 2                                                                    |
| GO membrane | 302 | 3643 | 8.688E-05 | 2589   | UDP-N-acetyl-alpha-D-galactosamine:polypeptide N-acetylgalactosaminyl transferase 1                |
| GO membrane | 302 | 3643 | 8.688E-05 | 259232 | sodium leak channel, non-selective                                                                 |
| GO membrane | 302 | 3643 | 8.688E-05 | 25956  | SEC31 homolog B (S. cerevisiae)                                                                    |
| GO membrane | 302 | 3643 | 8.688E-05 | 26035  | glucuronic acid epimerase                                                                          |
| GO membrane | 302 | 3643 | 8.688E-05 | 26050  | SLIT and NTRK-like family, member 5                                                                |
| GO membrane | 302 | 3643 | 8.688E-05 | 2615   | leucine rich repeat containing 32                                                                  |
| GO membrane | 302 | 3643 | 8.688E-05 | 26157  | GTPase, IMAP family member 2                                                                       |
| GO membrane | 302 | 3643 | 8.688E-05 | 2635   | guanylate binding protein 3                                                                        |
| GO membrane | 302 | 3643 | 8.688E-05 | 27035  | NADPH oxidase 1                                                                                    |
| GO membrane | 302 | 3643 | 8.688E-05 | 27090  | ST6 (alpha-N-acetylneuraminyl-2,3-beta-galactosyl-1,3)-N-acetylgalactosaminyl transferase 6        |
| GO membrane | 302 | 3643 | 8.688E-05 | 27242  | tumor necrosis factor receptor superfamily, member 21                                              |
| GO membrane | 302 | 3643 | 8.688E-05 | 27345  | potassium large conductance calcium-activated channel, subfamily M, member 1                       |
| GO membrane | 302 | 3643 | 8.688E-05 | 2801   | golgin A2                                                                                          |
| GO membrane | 302 | 3643 | 8.688E-05 | 28231  | solute carrier organic anion transporter family, member 4A1                                        |

|             |     |      |           |                                                                           |
|-------------|-----|------|-----------|---------------------------------------------------------------------------|
| GO membrane | 302 | 3643 | 8.688E-05 | 283417 dpy-19-like 2 (C. elegans)                                         |
| GO membrane | 302 | 3643 | 8.688E-05 | 283537 solute carrier family 46, member 3                                 |
| GO membrane | 302 | 3643 | 8.688E-05 | 284021 chromosome 17 open reading frame 60                                |
| GO membrane | 302 | 3643 | 8.688E-05 | 284353 NTPase, KAP family P-loop domain containing 1                      |
| GO membrane | 302 | 3643 | 8.688E-05 | 286144 chromosome 8 open reading frame 83                                 |
| GO membrane | 302 | 3643 | 8.688E-05 | 28959 transmembrane protein 176B                                          |
| GO membrane | 302 | 3643 | 8.688E-05 | 29015 solute carrier family 43, member 3                                  |
| GO membrane | 302 | 3643 | 8.688E-05 | 29103 DnaJ (Hsp40) homolog, subfamily C, member 15                        |
| GO membrane | 302 | 3643 | 8.688E-05 | 30008 EGF-containing fibulin-like extracellular matrix protein 2          |
| GO membrane | 302 | 3643 | 8.688E-05 | 3134 major histocompatibility complex, class I, F                         |
| GO membrane | 302 | 3643 | 8.688E-05 | 3294 hydroxysteroid (17-beta) dehydrogenase 2                             |
| GO membrane | 302 | 3643 | 8.688E-05 | 3429 interferon, alpha-inducible protein 27                               |
| GO membrane | 302 | 3643 | 8.688E-05 | 3561 interleukin 2 receptor, gamma (severe combined immunodeficiency)     |
| GO membrane | 302 | 3643 | 8.688E-05 | 3601 interleukin 15 receptor, alpha                                       |
| GO membrane | 302 | 3643 | 8.688E-05 | 3604 tumor necrosis factor receptor superfamily, member 9                 |
| GO membrane | 302 | 3643 | 8.688E-05 | 3643 insulin receptor                                                     |
| GO membrane | 302 | 3643 | 8.688E-05 | 3687 integrin, alpha X (complement component 3 receptor 4 subunit)        |
| GO membrane | 302 | 3643 | 8.688E-05 | 3696 integrin, beta 8                                                     |
| GO membrane | 302 | 3643 | 8.688E-05 | 3709 inositol 1,4,5-triphosphate receptor, type 2                         |
| GO membrane | 302 | 3643 | 8.688E-05 | 374378 UDP-N-acetyl-alpha-D-galactosamine:polypeptide N-acetylgalactosami |
| GO membrane | 302 | 3643 | 8.688E-05 | 375056 melanoma inhibitory activity family, member 3                      |
| GO membrane | 302 | 3643 | 8.688E-05 | 3759 potassium inwardly-rectifying channel, subfamily J, member 2         |
| GO membrane | 302 | 3643 | 8.688E-05 | 3773 potassium inwardly-rectifying channel, subfamily J, member 16        |
| GO membrane | 302 | 3643 | 8.688E-05 | 3775 potassium channel, subfamily K, member 1                             |
| GO membrane | 302 | 3643 | 8.688E-05 | 3783 potassium intermediate/small conductance calcium-activated channel,  |
| GO membrane | 302 | 3643 | 8.688E-05 | 3786 potassium voltage-gated channel, KQT-like subfamily, member 3        |
| GO membrane | 302 | 3643 | 8.688E-05 | 378925 ring finger protein 148                                            |
| GO membrane | 302 | 3643 | 8.688E-05 | 3815 v-kit Hardy-Zuckerman 4 feline sarcoma viral oncogene homolog        |
| GO membrane | 302 | 3643 | 8.688E-05 | 3823 killer cell lectin-like receptor subfamily C, member 3               |
| GO membrane | 302 | 3643 | 8.688E-05 | 387496 RAS-like, family 11, member A                                      |
| GO membrane | 302 | 3643 | 8.688E-05 | 387923 stress-associated endoplasmic reticulum protein family 2 member 2  |
| GO membrane | 302 | 3643 | 8.688E-05 | 388633 low density lipoprotein receptor class A domain containing 1       |
| GO membrane | 302 | 3643 | 8.688E-05 | 3959 lectin, galactoside-binding, soluble, 3 binding protein              |
| GO membrane | 302 | 3643 | 8.688E-05 | 4038 low density lipoprotein receptor-related protein 4                   |
| GO membrane | 302 | 3643 | 8.688E-05 | 4056 leukotriene C4 synthase                                              |
| GO membrane | 302 | 3643 | 8.688E-05 | 405753 dual oxidase maturation factor 2                                   |

|             |     |      |           |                                                                          |
|-------------|-----|------|-----------|--------------------------------------------------------------------------|
| GO membrane | 302 | 3643 | 8.688E-05 | 4065 lymphocyte antigen 75                                               |
| GO membrane | 302 | 3643 | 8.688E-05 | 4121 mannosidase, alpha, class 1A, member 1                              |
| GO membrane | 302 | 3643 | 8.688E-05 | 4128 monoamine oxidase A                                                 |
| GO membrane | 302 | 3643 | 8.688E-05 | 4129 monoamine oxidase B                                                 |
| GO membrane | 302 | 3643 | 8.688E-05 | 4170 myeloid cell leukemia sequence 1 (BCL2-related)                     |
| GO membrane | 302 | 3643 | 8.688E-05 | 4306 nuclear receptor subfamily 3, group C, member 2                     |
| GO membrane | 302 | 3643 | 8.688E-05 | 4915 neurotrophic tyrosine kinase, receptor, type 2                      |
| GO membrane | 302 | 3643 | 8.688E-05 | 4939 2'-5'-oligoadenylate synthetase 2, 69/71kDa                         |
| GO membrane | 302 | 3643 | 8.688E-05 | 5025 purinergic receptor P2X, ligand-gated ion channel, 4                |
| GO membrane | 302 | 3643 | 8.688E-05 | 5046 proprotein convertase subtilisin/kexin type 6                       |
| GO membrane | 302 | 3643 | 8.688E-05 | 5066 peptidylglycine alpha-amidating monooxygenase                       |
| GO membrane | 302 | 3643 | 8.688E-05 | 50937 Cdon homolog (mouse)                                               |
| GO membrane | 302 | 3643 | 8.688E-05 | 51063 calcium homeostasis modulator 2                                    |
| GO membrane | 302 | 3643 | 8.688E-05 | 51093 chromosome 1 open reading frame 66                                 |
| GO membrane | 302 | 3643 | 8.688E-05 | 51228 glycolipid transfer protein                                        |
| GO membrane | 302 | 3643 | 8.688E-05 | 51272 blocked early in transport 1 homolog ( <i>S. cerevisiae</i> )-like |
| GO membrane | 302 | 3643 | 8.688E-05 | 51280 golgi membrane protein 1                                           |
| GO membrane | 302 | 3643 | 8.688E-05 | 51285 RAS-like, family 12                                                |
| GO membrane | 302 | 3643 | 8.688E-05 | 51303 FK506 binding protein 11, 19 kDa                                   |
| GO membrane | 302 | 3643 | 8.688E-05 | 51309 armadillo repeat containing, X-linked 1                            |
| GO membrane | 302 | 3643 | 8.688E-05 | 51313 family with sequence similarity 198, member B                      |
| GO membrane | 302 | 3643 | 8.688E-05 | 5158 phosphodiesterase 6B, cGMP-specific, rod, beta                      |
| GO membrane | 302 | 3643 | 8.688E-05 | 51703 acyl-CoA synthetase long-chain family member 5                     |
| GO membrane | 302 | 3643 | 8.688E-05 | 5243 ATP-binding cassette, sub-family B (MDR/TAP), member 1              |
| GO membrane | 302 | 3643 | 8.688E-05 | 53373 two pore segment channel 1                                         |
| GO membrane | 302 | 3643 | 8.688E-05 | 53405 chloride intracellular channel 5                                   |
| GO membrane | 302 | 3643 | 8.688E-05 | 5349 FXYD domain containing ion transport regulator 3                    |
| GO membrane | 302 | 3643 | 8.688E-05 | 5351 procollagen-lysine 1, 2-oxoglutarate 5-dioxygenase 1                |
| GO membrane | 302 | 3643 | 8.688E-05 | 53827 FXYD domain containing ion transport regulator 5                   |
| GO membrane | 302 | 3643 | 8.688E-05 | 53947 alpha 1,4-galactosyltransferase                                    |
| GO membrane | 302 | 3643 | 8.688E-05 | 54463 family with sequence similarity 134, member B                      |
| GO membrane | 302 | 3643 | 8.688E-05 | 54664 transmembrane protein 106B                                         |
| GO membrane | 302 | 3643 | 8.688E-05 | 54681 prolyl 4-hydroxylase, transmembrane (endoplasmic reticulum)        |
| GO membrane | 302 | 3643 | 8.688E-05 | 54852 progesterin and adipoQ receptor family member V                    |
| GO membrane | 302 | 3643 | 8.688E-05 | 54894 ring finger protein 43                                             |
| GO membrane | 302 | 3643 | 8.688E-05 | 54933 rhomboid, veinlet-like 2 ( <i>Drosophila</i> )                     |

|             |     |      |           |                                                                              |
|-------------|-----|------|-----------|------------------------------------------------------------------------------|
| GO membrane | 302 | 3643 | 8.688E-05 | 54947 lysophosphatidylcholine acyltransferase 2                              |
| GO membrane | 302 | 3643 | 8.688E-05 | 55061 sushi domain containing 4                                              |
| GO membrane | 302 | 3643 | 8.688E-05 | 55076 transmembrane protein 45A                                              |
| GO membrane | 302 | 3643 | 8.688E-05 | 55275 vacuolar protein sorting 53 homolog ( <i>S. cerevisiae</i> )           |
| GO membrane | 302 | 3643 | 8.688E-05 | 55281 transmembrane protein 140                                              |
| GO membrane | 302 | 3643 | 8.688E-05 | 55304 serine palmitoyltransferase, long chain base subunit 3                 |
| GO membrane | 302 | 3643 | 8.688E-05 | 55332 DNA-damage regulated autophagy modulator 1                             |
| GO membrane | 302 | 3643 | 8.688E-05 | 55365 transmembrane protein 176A                                             |
| GO membrane | 302 | 3643 | 8.688E-05 | 55638 Golgi-localized protein                                                |
| GO membrane | 302 | 3643 | 8.688E-05 | 55714 odz, odd Oz/ten-m homolog 3 ( <i>Drosophila</i> )                      |
| GO membrane | 302 | 3643 | 8.688E-05 | 55754 transmembrane protein 30A                                              |
| GO membrane | 302 | 3643 | 8.688E-05 | 55799 calcium channel, voltage-dependent, alpha 2/delta subunit 3            |
| GO membrane | 302 | 3643 | 8.688E-05 | 55808 ST6 (alpha-N-acetyl-neuraminyl-2,3-beta-galactosyl-1,3)-N-acetylgalact |
| GO membrane | 302 | 3643 | 8.688E-05 | 56605 ERO1-like beta ( <i>S. cerevisiae</i> )                                |
| GO membrane | 302 | 3643 | 8.688E-05 | 56649 transmembrane protease, serine 4                                       |
| GO membrane | 302 | 3643 | 8.688E-05 | 56654 neural proliferation, differentiation and control, 1                   |
| GO membrane | 302 | 3643 | 8.688E-05 | 56913 core 1 synthase, glycoprotein-N-acetylgalactosamine 3-beta-galactosyl  |
| GO membrane | 302 | 3643 | 8.688E-05 | 57132 chromatin modifying protein 1B                                         |
| GO membrane | 302 | 3643 | 8.688E-05 | 57134 mannosidase, alpha, class 1C, member 1                                 |
| GO membrane | 302 | 3643 | 8.688E-05 | 57146 transmembrane protein 159                                              |
| GO membrane | 302 | 3643 | 8.688E-05 | 57161 pellino homolog 2 ( <i>Drosophila</i> )                                |
| GO membrane | 302 | 3643 | 8.688E-05 | 57185 NIPA-like domain containing 3                                          |
| GO membrane | 302 | 3643 | 8.688E-05 | 57210 solute carrier family 45, member 4                                     |
| GO membrane | 302 | 3643 | 8.688E-05 | 57221 KIAA1244                                                               |
| GO membrane | 302 | 3643 | 8.688E-05 | 5724 platelet-activating factor receptor                                     |
| GO membrane | 302 | 3643 | 8.688E-05 | 57458 transmembrane and coiled-coil domain family 3                          |
| GO membrane | 302 | 3643 | 8.688E-05 | 57493 HEG homolog 1 (zebrafish)                                              |
| GO membrane | 302 | 3643 | 8.688E-05 | 57535 KIAA1324                                                               |
| GO membrane | 302 | 3643 | 8.688E-05 | 57537 sortilin-related VPS10 domain containing receptor 2                    |
| GO membrane | 302 | 3643 | 8.688E-05 | 57670 KIAA1549                                                               |
| GO membrane | 302 | 3643 | 8.688E-05 | 5768 quiescin Q6 sulfhydryl oxidase 1                                        |
| GO membrane | 302 | 3643 | 8.688E-05 | 5787 protein tyrosine phosphatase, receptor type, B                          |
| GO membrane | 302 | 3643 | 8.688E-05 | 5789 protein tyrosine phosphatase, receptor type, D                          |
| GO membrane | 302 | 3643 | 8.688E-05 | 5794 protein tyrosine phosphatase, receptor type, H                          |
| GO membrane | 302 | 3643 | 8.688E-05 | 5799 protein tyrosine phosphatase, receptor type, N polypeptide 2            |
| GO membrane | 302 | 3643 | 8.688E-05 | 5873 RAB27A, member RAS oncogene family                                      |



|             |     |      |           |                                                                                  |
|-------------|-----|------|-----------|----------------------------------------------------------------------------------|
| GO membrane | 302 | 3643 | 8.688E-05 | 59271 chromosome 21 open reading frame 63                                        |
| GO membrane | 302 | 3643 | 8.688E-05 | 5972 renin                                                                       |
| GO membrane | 302 | 3643 | 8.688E-05 | 6006 Rh blood group, CcEe antigens                                               |
| GO membrane | 302 | 3643 | 8.688E-05 | 6238 ribosome binding protein 1 homolog 180kDa (dog)                             |
| GO membrane | 302 | 3643 | 8.688E-05 | 63027 solute carrier family 22, member 23                                        |
| GO membrane | 302 | 3643 | 8.688E-05 | 6330 sodium channel, voltage-gated, type IV, beta                                |
| GO membrane | 302 | 3643 | 8.688E-05 | 63982 anoctamin 3                                                                |
| GO membrane | 302 | 3643 | 8.688E-05 | 64108 receptor (chemosensory) transporter protein 4                              |
| GO membrane | 302 | 3643 | 8.688E-05 | 64116 solute carrier family 39 (zinc transporter), member 8                      |
| GO membrane | 302 | 3643 | 8.688E-05 | 646658 transmembrane protein 90A                                                 |
| GO membrane | 302 | 3643 | 8.688E-05 | 64699 transmembrane protease, serine 3                                           |
| GO membrane | 302 | 3643 | 8.688E-05 | 6484 ST3 beta-galactoside alpha-2,3-sialyltransferase 4                          |
| GO membrane | 302 | 3643 | 8.688E-05 | 6489 ST8 alpha-N-acetyl-neuraminide alpha-2,8-sialyltransferase 1                |
| GO membrane | 302 | 3643 | 8.688E-05 | 6494 signal-induced proliferation-associated 1                                   |
| GO membrane | 302 | 3643 | 8.688E-05 | 6505 solute carrier family 1 (neuronal/epithelial high affinity glutamate transp |
| GO membrane | 302 | 3643 | 8.688E-05 | 6521 solute carrier family 4, anion exchanger, member 1 (erythrocyte memb        |
| GO membrane | 302 | 3643 | 8.688E-05 | 6535 solute carrier family 6 (neurotransmitter transporter, creatine), memb      |
| GO membrane | 302 | 3643 | 8.688E-05 | 6542 solute carrier family 7 (cationic amino acid transporter, y+ system), me    |
| GO membrane | 302 | 3643 | 8.688E-05 | 654463 fer-1-like 6 (C. elegans)                                                 |
| GO membrane | 302 | 3643 | 8.688E-05 | 6564 solute carrier family 15 (oligopeptide transporter), member 1               |
| GO membrane | 302 | 3643 | 8.688E-05 | 6565 solute carrier family 15 (H+/peptide transporter), member 2                 |
| GO membrane | 302 | 3643 | 8.688E-05 | 6653 sortilin-related receptor, L(DLR class) A repeats-containing                |
| GO membrane | 302 | 3643 | 8.688E-05 | 6916 thromboxane A synthase 1 (platelet)                                         |
| GO membrane | 302 | 3643 | 8.688E-05 | 7098 toll-like receptor 3                                                        |
| GO membrane | 302 | 3643 | 8.688E-05 | 7102 tetraspanin 7                                                               |
| GO membrane | 302 | 3643 | 8.688E-05 | 7111 tropomodulin 1                                                              |
| GO membrane | 302 | 3643 | 8.688E-05 | 727910 TLC domain containing 2                                                   |
| GO membrane | 302 | 3643 | 8.688E-05 | 728215 family with sequence similarity 155, member A                             |
| GO membrane | 302 | 3643 | 8.688E-05 | 731 complement component 8, alpha polypeptide                                    |
| GO membrane | 302 | 3643 | 8.688E-05 | 771 carbonic anhydrase XII                                                       |
| GO membrane | 302 | 3643 | 8.688E-05 | 7869 sema domain, immunoglobulin domain (Ig), short basic domain, secret         |
| GO membrane | 302 | 3643 | 8.688E-05 | 79152 fatty acid 2-hydroxylase                                                   |
| GO membrane | 302 | 3643 | 8.688E-05 | 79180 EF-hand domain family, member D2                                           |
| GO membrane | 302 | 3643 | 8.688E-05 | 79695 UDP-N-acetyl-alpha-D-galactosamine:polypeptide N-acetylgalactosami         |
| GO membrane | 302 | 3643 | 8.688E-05 | 79789 calmin (calponin-like, transmembrane)                                      |
| GO membrane | 302 | 3643 | 8.688E-05 | 79820 cation channel, sperm-associated, beta                                     |

|             |     |      |           |                                                                             |
|-------------|-----|------|-----------|-----------------------------------------------------------------------------|
| GO membrane | 302 | 3643 | 8.688E-05 | 79838 transmembrane channel-like 5                                          |
| GO membrane | 302 | 3643 | 8.688E-05 | 79895 ATPase, class I, type 8B, member 4                                    |
| GO membrane | 302 | 3643 | 8.688E-05 | 79932 KIAA0319-like                                                         |
| GO membrane | 302 | 3643 | 8.688E-05 | 79956 endoplasmic reticulum metalloproteinase 1                             |
| GO membrane | 302 | 3643 | 8.688E-05 | 79957 progesterin and adiponectin receptor family member VI                 |
| GO membrane | 302 | 3643 | 8.688E-05 | 79971 wntless homolog (Drosophila)                                          |
| GO membrane | 302 | 3643 | 8.688E-05 | 79987 sushi, von Willebrand factor type A, EGF and pentraxin domain contain |
| GO membrane | 302 | 3643 | 8.688E-05 | 80223 RAB11 family interacting protein 1 (class I)                          |
| GO membrane | 302 | 3643 | 8.688E-05 | 81544 glycerophosphodiester phosphodiesterase domain containing 5           |
| GO membrane | 302 | 3643 | 8.688E-05 | 81615 transmembrane protein 163                                             |
| GO membrane | 302 | 3643 | 8.688E-05 | 81693 amnionless homolog (mouse)                                            |
| GO membrane | 302 | 3643 | 8.688E-05 | 819 calcium modulating ligand                                               |
| GO membrane | 302 | 3643 | 8.688E-05 | 83394 PITPNM family member 3                                                |
| GO membrane | 302 | 3643 | 8.688E-05 | 83661 membrane-spanning 4-domains, subfamily A, member 8B                   |
| GO membrane | 302 | 3643 | 8.688E-05 | 83857 transmembrane and tetratricopeptide repeat containing 1               |
| GO membrane | 302 | 3643 | 8.688E-05 | 83890 spermatogenesis associated 9                                          |
| GO membrane | 302 | 3643 | 8.688E-05 | 84059 G protein-coupled receptor 98                                         |
| GO membrane | 302 | 3643 | 8.688E-05 | 8406 sushi-repeat-containing protein, X-linked                              |
| GO membrane | 302 | 3643 | 8.688E-05 | 84171 lysyl oxidase-like 4                                                  |
| GO membrane | 302 | 3643 | 8.688E-05 | 84561 solute carrier family 12 (potassium/chloride transporters), member 8  |
| GO membrane | 302 | 3643 | 8.688E-05 | 84879 major facilitator superfamily domain containing 2A                    |
| GO membrane | 302 | 3643 | 8.688E-05 | 84976 dispatched homolog 1 (Drosophila)                                     |
| GO membrane | 302 | 3643 | 8.688E-05 | 85004 RAS-like, estrogen-regulated, growth inhibitor                        |
| GO membrane | 302 | 3643 | 8.688E-05 | 8509 N-deacetylase/N-sulfotransferase (heparan glucosaminyl) 2              |
| GO membrane | 302 | 3643 | 8.688E-05 | 8645 potassium channel, subfamily K, member 5                               |
| GO membrane | 302 | 3643 | 8.688E-05 | 8673 vesicle-associated membrane protein 8 (endobrevin)                     |
| GO membrane | 302 | 3643 | 8.688E-05 | 8706 beta-1,3-N-acetylgalactosaminyltransferase 1 (globoside blood group)   |
| GO membrane | 302 | 3643 | 8.688E-05 | 8751 ADAM metalloproteinase domain 15                                       |
| GO membrane | 302 | 3643 | 8.688E-05 | 8793 tumor necrosis factor receptor superfamily, member 10d, decoy with t   |
| GO membrane | 302 | 3643 | 8.688E-05 | 8796 sciellin                                                               |
| GO membrane | 302 | 3643 | 8.688E-05 | 8911 calcium channel, voltage-dependent, T type, alpha 1I subunit           |
| GO membrane | 302 | 3643 | 8.688E-05 | 89801 protein phosphatase 1, regulatory (inhibitor) subunit 3F              |
| GO membrane | 302 | 3643 | 8.688E-05 | 89866 SEC16 homolog B (S. cerevisiae)                                       |
| GO membrane | 302 | 3643 | 8.688E-05 | 8992 ATPase, H <sup>+</sup> transporting, lysosomal 9kDa, V0 subunit e1     |
| GO membrane | 302 | 3643 | 8.688E-05 | 9019 myelin protein zero-like 1                                             |
| GO membrane | 302 | 3643 | 8.688E-05 | 9050 proline-serine-threonine phosphatase interacting protein 2             |

|                                                   |     |      |           |                                                                                   |
|---------------------------------------------------|-----|------|-----------|-----------------------------------------------------------------------------------|
| GO membrane                                       | 302 | 3643 | 8.688E-05 | 90993 cAMP responsive element binding protein 3-like 1                            |
| GO membrane                                       | 302 | 3643 | 8.688E-05 | 91 activin A receptor, type IB                                                    |
| GO membrane                                       | 302 | 3643 | 8.688E-05 | 9143 synaptogyrin 3                                                               |
| GO membrane                                       | 302 | 3643 | 8.688E-05 | 9214 Fas apoptotic inhibitory molecule 3                                          |
| GO membrane                                       | 302 | 3643 | 8.688E-05 | 92691 transmembrane protein 169                                                   |
| GO membrane                                       | 302 | 3643 | 8.688E-05 | 92840 receptor accessory protein 6                                                |
| GO membrane                                       | 302 | 3643 | 8.688E-05 | 93273 LEM domain containing 1                                                     |
| GO membrane                                       | 302 | 3643 | 8.688E-05 | 93589 calcium channel, voltage-dependent, alpha 2/delta subunit 4                 |
| GO membrane                                       | 302 | 3643 | 8.688E-05 | 94 activin A receptor type II-like 1                                              |
| GO membrane                                       | 302 | 3643 | 8.688E-05 | 9435 carbohydrate (N-acetylglucosamine-6-O) sulfotransferase 2                    |
| GO membrane                                       | 302 | 3643 | 8.688E-05 | 9445 integral membrane protein 2B                                                 |
| GO membrane                                       | 302 | 3643 | 8.688E-05 | 9452 integral membrane protein 2A                                                 |
| GO membrane                                       | 302 | 3643 | 8.688E-05 | 9481 solute carrier family 25, member 27                                          |
| GO membrane                                       | 302 | 3643 | 8.688E-05 | 9537 tumor protein p53 inducible protein 11                                       |
| GO membrane                                       | 302 | 3643 | 8.688E-05 | 9804 translocase of outer mitochondrial membrane 20 homolog (yeast)               |
| GO membrane                                       | 302 | 3643 | 8.688E-05 | 9823 armadillo repeat containing, X-linked 2                                      |
| GO membrane                                       | 302 | 3643 | 8.688E-05 | 9914 ATPase, Ca <sup>++</sup> transporting, type 2C, member 2                     |
| GO transmembrane receptor protein tyrosine kinase | 7   | 18   | 0.0001116 | 10076 protein tyrosine phosphatase, receptor type, U                              |
| GO transmembrane receptor protein tyrosine kinase | 7   | 18   | 0.0001116 | 5787 protein tyrosine phosphatase, receptor type, B                               |
| GO transmembrane receptor protein tyrosine kinase | 7   | 18   | 0.0001116 | 5789 protein tyrosine phosphatase, receptor type, D                               |
| GO transmembrane receptor protein tyrosine kinase | 7   | 18   | 0.0001116 | 5791 protein tyrosine phosphatase, receptor type, E                               |
| GO transmembrane receptor protein tyrosine kinase | 7   | 18   | 0.0001116 | 5794 protein tyrosine phosphatase, receptor type, H                               |
| GO transmembrane receptor protein tyrosine kinase | 7   | 18   | 0.0001116 | 5799 protein tyrosine phosphatase, receptor type, N polypeptide 2                 |
| GO transmembrane receptor protein tyrosine kinase | 7   | 18   | 0.0001116 | 5801 protein tyrosine phosphatase, receptor type, R                               |
| GO response to progesterone stimulus              | 8   | 24   | 0.0001275 | 10628 thioredoxin interacting protein                                             |
| GO response to progesterone stimulus              | 8   | 24   | 0.0001275 | 2066 v-erb-a erythroblastic leukemia viral oncogene homolog 4 (avian)             |
| GO response to progesterone stimulus              | 8   | 24   | 0.0001275 | 2353 FBJ murine osteosarcoma viral oncogene homolog                               |
| GO response to progesterone stimulus              | 8   | 24   | 0.0001275 | 3726 jun B proto-oncogene                                                         |
| GO response to progesterone stimulus              | 8   | 24   | 0.0001275 | 7097 toll-like receptor 2                                                         |
| GO response to progesterone stimulus              | 8   | 24   | 0.0001275 | 7099 toll-like receptor 4                                                         |
| GO response to progesterone stimulus              | 8   | 24   | 0.0001275 | 9021 suppressor of cytokine signaling 3                                           |
| GO response to progesterone stimulus              | 8   | 24   | 0.0001275 | 952 CD38 molecule                                                                 |
| GO innate immune response                         | 19  | 109  | 0.0001382 | 10417 spondin 2, extracellular matrix protein                                     |
| GO innate immune response                         | 19  | 109  | 0.0001382 | 1380 complement component (3d/Epstein Barr virus) receptor 2                      |
| GO innate immune response                         | 19  | 109  | 0.0001382 | 1604 CD55 molecule, decay accelerating factor for complement (Cromer blood group) |
| GO innate immune response                         | 19  | 109  | 0.0001382 | 1755 deleted in malignant brain tumors 1                                          |

|                                          |     |      |           |                                                                             |
|------------------------------------------|-----|------|-----------|-----------------------------------------------------------------------------|
| GO innate immune response                | 19  | 109  | 0.0001382 | 4179 CD46 molecule, complement regulatory protein                           |
| GO innate immune response                | 19  | 109  | 0.0001382 | 51279 complement component 1, r subcomponent-like                           |
| GO innate immune response                | 19  | 109  | 0.0001382 | 64127 nucleotide-binding oligomerization domain containing 2                |
| GO innate immune response                | 19  | 109  | 0.0001382 | 64135 interferon induced with helicase C domain 1                           |
| GO innate immune response                | 19  | 109  | 0.0001382 | 7097 toll-like receptor 2                                                   |
| GO innate immune response                | 19  | 109  | 0.0001382 | 7098 toll-like receptor 3                                                   |
| GO innate immune response                | 19  | 109  | 0.0001382 | 7099 toll-like receptor 4                                                   |
| GO innate immune response                | 19  | 109  | 0.0001382 | 7100 toll-like receptor 5                                                   |
| GO innate immune response                | 19  | 109  | 0.0001382 | 715 complement component 1, r subcomponent                                  |
| GO innate immune response                | 19  | 109  | 0.0001382 | 722 complement component 4 binding protein, alpha                           |
| GO innate immune response                | 19  | 109  | 0.0001382 | 725 complement component 4 binding protein, beta                            |
| GO innate immune response                | 19  | 109  | 0.0001382 | 7706 tripartite motif-containing 25                                         |
| GO innate immune response                | 19  | 109  | 0.0001382 | 79132 DEXH (Asp-Glu-X-His) box polypeptide 58                               |
| GO innate immune response                | 19  | 109  | 0.0001382 | 8542 apolipoprotein L, 1                                                    |
| GO innate immune response                | 19  | 109  | 0.0001382 | 929 CD14 molecule                                                           |
| GO negative regulation of ERK1 and ERK2  | 5   | 9    | 0.0001478 | 10252 sprouty homolog 1, antagonist of FGF signaling (Drosophila)           |
| GO negative regulation of ERK1 and ERK2  | 5   | 9    | 0.0001478 | 10253 sprouty homolog 2 (Drosophila)                                        |
| GO negative regulation of ERK1 and ERK2  | 5   | 9    | 0.0001478 | 154043 CNKSR family member 3                                                |
| GO negative regulation of ERK1 and ERK2  | 5   | 9    | 0.0001478 | 3479 insulin-like growth factor 1 (somatomedin C)                           |
| GO negative regulation of ERK1 and ERK2  | 5   | 9    | 0.0001478 | 7099 toll-like receptor 4                                                   |
| GO Rho guanyl-nucleotide exchange factor | 14  | 68   | 0.0001702 | 152273 FYVE, RhoGEF and PH domain containing 5                              |
| GO Rho guanyl-nucleotide exchange factor | 14  | 68   | 0.0001702 | 221178 spermatogenesis associated 13                                        |
| GO Rho guanyl-nucleotide exchange factor | 14  | 68   | 0.0001702 | 23263 MCF.2 cell line derived transforming sequence-like                    |
| GO Rho guanyl-nucleotide exchange factor | 14  | 68   | 0.0001702 | 23348 dedicator of cytokinesis 9                                            |
| GO Rho guanyl-nucleotide exchange factor | 14  | 68   | 0.0001702 | 23365 Rho guanine nucleotide exchange factor (GEF) 12                       |
| GO Rho guanyl-nucleotide exchange factor | 14  | 68   | 0.0001702 | 26030 pleckstrin homology domain containing, family G (with RhoGef domain)  |
| GO Rho guanyl-nucleotide exchange factor | 14  | 68   | 0.0001702 | 389337 Rho guanine nucleotide exchange factor (GEF) 37                      |
| GO Rho guanyl-nucleotide exchange factor | 14  | 68   | 0.0001702 | 440107 pleckstrin homology domain containing, family G (with RhoGef domain) |
| GO Rho guanyl-nucleotide exchange factor | 14  | 68   | 0.0001702 | 54848 Rho guanine nucleotide exchange factor (GEF) 38                       |
| GO Rho guanyl-nucleotide exchange factor | 14  | 68   | 0.0001702 | 55160 Rho guanine nucleotide exchange factor (GEF) 10-like                  |
| GO Rho guanyl-nucleotide exchange factor | 14  | 68   | 0.0001702 | 55200 pleckstrin homology domain containing, family G (with RhoGef domain)  |
| GO Rho guanyl-nucleotide exchange factor | 14  | 68   | 0.0001702 | 7984 Rho guanine nucleotide exchange factor (GEF) 5                         |
| GO Rho guanyl-nucleotide exchange factor | 14  | 68   | 0.0001702 | 84033 obscurin, cytoskeletal calmodulin and titin-interacting RhoGEF        |
| GO Rho guanyl-nucleotide exchange factor | 14  | 68   | 0.0001702 | 9459 Rac/Cdc42 guanine nucleotide exchange factor (GEF) 6                   |
| GO integral to membrane                  | 315 | 3857 | 0.0001793 | 10008 potassium voltage-gated channel, Isk-related family, member 3         |
| GO integral to membrane                  | 315 | 3857 | 0.0001793 | 1004 cadherin 6, type 2, K-cadherin (fetal kidney)                          |

|                         |     |      |           |                                                                                    |
|-------------------------|-----|------|-----------|------------------------------------------------------------------------------------|
| GO integral to membrane | 315 | 3857 | 0.0001793 | 1009 cadherin 11, type 2, OB-cadherin (osteoblast)                                 |
| GO integral to membrane | 315 | 3857 | 0.0001793 | 10090 uronyl-2-sulfotransferase                                                    |
| GO integral to membrane | 315 | 3857 | 0.0001793 | 10103 tetraspanin 1                                                                |
| GO integral to membrane | 315 | 3857 | 0.0001793 | 1014 cadherin 16, KSP-cadherin                                                     |
| GO integral to membrane | 315 | 3857 | 0.0001793 | 10158 PDZK1 interacting protein 1                                                  |
| GO integral to membrane | 315 | 3857 | 0.0001793 | 1016 cadherin 18, type 2                                                           |
| GO integral to membrane | 315 | 3857 | 0.0001793 | 10162 lysophosphatidylcholine acyltransferase 3                                    |
| GO integral to membrane | 315 | 3857 | 0.0001793 | 10205 myelin protein zero-like 2                                                   |
| GO integral to membrane | 315 | 3857 | 0.0001793 | 10282 blocked early in transport 1 homolog ( <i>S. cerevisiae</i> )                |
| GO integral to membrane | 315 | 3857 | 0.0001793 | 10317 UDP-Gal:betaGlcNAc beta 1,3-galactosyltransferase, polypeptide 5             |
| GO integral to membrane | 315 | 3857 | 0.0001793 | 10335 murine retrovirus integration site 1 homolog                                 |
| GO integral to membrane | 315 | 3857 | 0.0001793 | 10384 butyrophilin, subfamily 3, member A3                                         |
| GO integral to membrane | 315 | 3857 | 0.0001793 | 10410 interferon induced transmembrane protein 3 (1-8U)                            |
| GO integral to membrane | 315 | 3857 | 0.0001793 | 10507 sema domain, immunoglobulin domain (Ig), transmembrane domain (T             |
| GO integral to membrane | 315 | 3857 | 0.0001793 | 10568 solute carrier family 34 (sodium phosphate), member 2                        |
| GO integral to membrane | 315 | 3857 | 0.0001793 | 10752 cell adhesion molecule with homology to L1CAM (close homolog of L1)          |
| GO integral to membrane | 315 | 3857 | 0.0001793 | 1080 cystic fibrosis transmembrane conductance regulator (ATP-binding cas:         |
| GO integral to membrane | 315 | 3857 | 0.0001793 | 10826 chromosome 5 open reading frame 4                                            |
| GO integral to membrane | 315 | 3857 | 0.0001793 | 1087 carcinoembryonic antigen-related cell adhesion molecule 7                     |
| GO integral to membrane | 315 | 3857 | 0.0001793 | 10913 ectodysplasin A receptor                                                     |
| GO integral to membrane | 315 | 3857 | 0.0001793 | 112 adenylate cyclase 6                                                            |
| GO integral to membrane | 315 | 3857 | 0.0001793 | 11322 transmembrane channel-like 6                                                 |
| GO integral to membrane | 315 | 3857 | 0.0001793 | 113235 solute carrier family 46 (folate transporter), member 1                     |
| GO integral to membrane | 315 | 3857 | 0.0001793 | 113278 chromosome 20 open reading frame 54                                         |
| GO integral to membrane | 315 | 3857 | 0.0001793 | 1139 cholinergic receptor, nicotinic, alpha 7                                      |
| GO integral to membrane | 315 | 3857 | 0.0001793 | 114569 mal, T-cell differentiation protein 2                                       |
| GO integral to membrane | 315 | 3857 | 0.0001793 | 115330 G protein-coupled receptor 146                                              |
| GO integral to membrane | 315 | 3857 | 0.0001793 | 118429 anthrax toxin receptor 2                                                    |
| GO integral to membrane | 315 | 3857 | 0.0001793 | 1193 chloride intracellular channel 2                                              |
| GO integral to membrane | 315 | 3857 | 0.0001793 | 119467 clarin 3                                                                    |
| GO integral to membrane | 315 | 3857 | 0.0001793 | 120224 transmembrane protein 45B                                                   |
| GO integral to membrane | 315 | 3857 | 0.0001793 | 121130 olfactory receptor, family 10, subfamily P, member 1                        |
| GO integral to membrane | 315 | 3857 | 0.0001793 | 121227 leucine-rich repeats and immunoglobulin-like domains 3                      |
| GO integral to membrane | 315 | 3857 | 0.0001793 | 121665 signal peptide peptidase 3                                                  |
| GO integral to membrane | 315 | 3857 | 0.0001793 | 123096 solute carrier family 25, member 29                                         |
| GO integral to membrane | 315 | 3857 | 0.0001793 | 123099 degenerative spermatocyte homolog 2, lipid desaturase ( <i>Drosophila</i> ) |

|                         |     |      |           |                                                                               |
|-------------------------|-----|------|-----------|-------------------------------------------------------------------------------|
| GO integral to membrane | 315 | 3857 | 0.0001793 | 127707 kelch domain containing 7A                                             |
| GO integral to membrane | 315 | 3857 | 0.0001793 | 127845 golgi transport 1 homolog A ( <i>S. cerevisiae</i> )                   |
| GO integral to membrane | 315 | 3857 | 0.0001793 | 130367 sphingosine-1-phosphate phosphotase 2                                  |
| GO integral to membrane | 315 | 3857 | 0.0001793 | 130399 activin A receptor, type IC                                            |
| GO integral to membrane | 315 | 3857 | 0.0001793 | 137994 leucine zipper-EF-hand containing transmembrane protein 2              |
| GO integral to membrane | 315 | 3857 | 0.0001793 | 1380 complement component (3d/Epstein Barr virus) receptor 2                  |
| GO integral to membrane | 315 | 3857 | 0.0001793 | 143425 synaptotagmin IX                                                       |
| GO integral to membrane | 315 | 3857 | 0.0001793 | 1435 colony stimulating factor 1 (macrophage)                                 |
| GO integral to membrane | 315 | 3857 | 0.0001793 | 143503 olfactory receptor, family 51, subfamily E, member 1                   |
| GO integral to membrane | 315 | 3857 | 0.0001793 | 144132 dynein heavy chain domain 1                                            |
| GO integral to membrane | 315 | 3857 | 0.0001793 | 145581 leucine rich repeat and fibronectin type III domain containing 5       |
| GO integral to membrane | 315 | 3857 | 0.0001793 | 147138 transmembrane channel-like 8                                           |
| GO integral to membrane | 315 | 3857 | 0.0001793 | 147798 transmembrane channel-like 4                                           |
| GO integral to membrane | 315 | 3857 | 0.0001793 | 148229 ATPase, class I, type 8B, member 3                                     |
| GO integral to membrane | 315 | 3857 | 0.0001793 | 151473 solute carrier family 16, member 14 (monocarboxylic acid transporter)  |
| GO integral to membrane | 315 | 3857 | 0.0001793 | 154141 membrane bound O-acyltransferase domain containing 1                   |
| GO integral to membrane | 315 | 3857 | 0.0001793 | 154214 ring finger protein 217                                                |
| GO integral to membrane | 315 | 3857 | 0.0001793 | 155006 transmembrane protein 213                                              |
| GO integral to membrane | 315 | 3857 | 0.0001793 | 157506 retinol dehydrogenase 10 (all-trans)                                   |
| GO integral to membrane | 315 | 3857 | 0.0001793 | 157855 potassium channel, subfamily U, member 1                               |
| GO integral to membrane | 315 | 3857 | 0.0001793 | 158038 leucine rich repeat and Ig domain containing 2                         |
| GO integral to membrane | 315 | 3857 | 0.0001793 | 160518 DENN/MADD domain containing 5B                                         |
| GO integral to membrane | 315 | 3857 | 0.0001793 | 163590 torsin A interacting protein 2                                         |
| GO integral to membrane | 315 | 3857 | 0.0001793 | 165679 chromosome 3 open reading frame 57                                     |
| GO integral to membrane | 315 | 3857 | 0.0001793 | 1803 dipeptidyl-peptidase 4                                                   |
| GO integral to membrane | 315 | 3857 | 0.0001793 | 1901 sphingosine-1-phosphate receptor 1                                       |
| GO integral to membrane | 315 | 3857 | 0.0001793 | 192134 UDP-GlcNAc:betaGal beta-1,3-N-acetylglucosaminyltransferase 6 (core    |
| GO integral to membrane | 315 | 3857 | 0.0001793 | 195814 short chain dehydrogenase/reductase family 16C, member 5               |
| GO integral to membrane | 315 | 3857 | 0.0001793 | 200150 phospholipase D family, member 5                                       |
| GO integral to membrane | 315 | 3857 | 0.0001793 | 2013 epithelial membrane protein 2                                            |
| GO integral to membrane | 315 | 3857 | 0.0001793 | 201895 chromosome 4 open reading frame 34                                     |
| GO integral to membrane | 315 | 3857 | 0.0001793 | 2044 EPH receptor A5                                                          |
| GO integral to membrane | 315 | 3857 | 0.0001793 | 204962 solute carrier family 44, member 5                                     |
| GO integral to membrane | 315 | 3857 | 0.0001793 | 2055 ceroid-lipofuscinosis, neuronal 8 (epilepsy, progressive with mental ret |
| GO integral to membrane | 315 | 3857 | 0.0001793 | 2066 v-erb-a erythroblastic leukemia viral oncogene homolog 4 (avian)         |
| GO integral to membrane | 315 | 3857 | 0.0001793 | 2182 acyl-CoA synthetase long-chain family member 4                           |

|                         |     |      |           |        |                                                                          |
|-------------------------|-----|------|-----------|--------|--------------------------------------------------------------------------|
| GO integral to membrane | 315 | 3857 | 0.0001793 | 219623 | transmembrane protein 26                                                 |
| GO integral to membrane | 315 | 3857 | 0.0001793 | 221303 | family with sequence similarity 162, member B                            |
| GO integral to membrane | 315 | 3857 | 0.0001793 | 222223 | KIAA1324-like                                                            |
| GO integral to membrane | 315 | 3857 | 0.0001793 | 222545 | G protein-coupled receptor, family C, group 6, member A                  |
| GO integral to membrane | 315 | 3857 | 0.0001793 | 2263   | fibroblast growth factor receptor 2                                      |
| GO integral to membrane | 315 | 3857 | 0.0001793 | 22859  | latrophilin 1                                                            |
| GO integral to membrane | 315 | 3857 | 0.0001793 | 23151  | GRAM domain containing 4                                                 |
| GO integral to membrane | 315 | 3857 | 0.0001793 | 23266  | latrophilin 2                                                            |
| GO integral to membrane | 315 | 3857 | 0.0001793 | 23284  | latrophilin 3                                                            |
| GO integral to membrane | 315 | 3857 | 0.0001793 | 23418  | crumbs homolog 1 (Drosophila)                                            |
| GO integral to membrane | 315 | 3857 | 0.0001793 | 23654  | plexin B2                                                                |
| GO integral to membrane | 315 | 3857 | 0.0001793 | 2525   | fucosyltransferase 3 (galactoside 3(4)-L-fucosyltransferase, Lewis blood |
| GO integral to membrane | 315 | 3857 | 0.0001793 | 2526   | fucosyltransferase 4 (alpha (1,3) fucosyltransferase, myeloid-specific)  |
| GO integral to membrane | 315 | 3857 | 0.0001793 | 255104 | transmembrane and coiled-coil domains 4                                  |
| GO integral to membrane | 315 | 3857 | 0.0001793 | 255488 | ring finger protein 144B                                                 |
| GO integral to membrane | 315 | 3857 | 0.0001793 | 256987 | serine incorporator 5                                                    |
| GO integral to membrane | 315 | 3857 | 0.0001793 | 257019 | FERM domain containing 3                                                 |
| GO integral to membrane | 315 | 3857 | 0.0001793 | 25825  | beta-site APP-cleaving enzyme 2                                          |
| GO integral to membrane | 315 | 3857 | 0.0001793 | 2589   | UDP-N-acetyl-alpha-D-galactosamine:polypeptide N-acetylgalactosami       |
| GO integral to membrane | 315 | 3857 | 0.0001793 | 259232 | sodium leak channel, non-selective                                       |
| GO integral to membrane | 315 | 3857 | 0.0001793 | 26035  | glucuronic acid epimerase                                                |
| GO integral to membrane | 315 | 3857 | 0.0001793 | 26050  | SLIT and NTRK-like family, member 5                                      |
| GO integral to membrane | 315 | 3857 | 0.0001793 | 26157  | GTPase, IMAP family member 2                                             |
| GO integral to membrane | 315 | 3857 | 0.0001793 | 2635   | guanylate binding protein 3                                              |
| GO integral to membrane | 315 | 3857 | 0.0001793 | 2642   | glucagon receptor                                                        |
| GO integral to membrane | 315 | 3857 | 0.0001793 | 26507  | cyclin M1                                                                |
| GO integral to membrane | 315 | 3857 | 0.0001793 | 266675 | bestrophin 4                                                             |
| GO integral to membrane | 315 | 3857 | 0.0001793 | 27035  | NADPH oxidase 1                                                          |
| GO integral to membrane | 315 | 3857 | 0.0001793 | 2706   | gap junction protein, beta 2, 26kDa                                      |
| GO integral to membrane | 315 | 3857 | 0.0001793 | 2707   | gap junction protein, beta 3, 31kDa                                      |
| GO integral to membrane | 315 | 3857 | 0.0001793 | 27076  | LY6/PLAUR domain containing 3                                            |
| GO integral to membrane | 315 | 3857 | 0.0001793 | 27090  | ST6 (alpha-N-acetyl-neuraminyl-2,3-beta-galactosyl-1,3)-N-acetylgalact   |
| GO integral to membrane | 315 | 3857 | 0.0001793 | 27202  | G protein-coupled receptor 77                                            |
| GO integral to membrane | 315 | 3857 | 0.0001793 | 27242  | tumor necrosis factor receptor superfamily, member 21                    |
| GO integral to membrane | 315 | 3857 | 0.0001793 | 28231  | solute carrier organic anion transporter family, member 4A1              |
| GO integral to membrane | 315 | 3857 | 0.0001793 | 283316 | CD163 molecule-like 1                                                    |

|                         |     |      |           |                                                                           |
|-------------------------|-----|------|-----------|---------------------------------------------------------------------------|
| GO integral to membrane | 315 | 3857 | 0.0001793 | 283383 G protein-coupled receptor 133                                     |
| GO integral to membrane | 315 | 3857 | 0.0001793 | 283417 dpy-19-like 2 (C. elegans)                                         |
| GO integral to membrane | 315 | 3857 | 0.0001793 | 283537 solute carrier family 46, member 3                                 |
| GO integral to membrane | 315 | 3857 | 0.0001793 | 284021 chromosome 17 open reading frame 60                                |
| GO integral to membrane | 315 | 3857 | 0.0001793 | 284353 NTPase, KAP family P-loop domain containing 1                      |
| GO integral to membrane | 315 | 3857 | 0.0001793 | 286144 chromosome 8 open reading frame 83                                 |
| GO integral to membrane | 315 | 3857 | 0.0001793 | 286183 Na <sup>+</sup> /K <sup>+</sup> transporting ATPase interacting 3  |
| GO integral to membrane | 315 | 3857 | 0.0001793 | 28959 transmembrane protein 176B                                          |
| GO integral to membrane | 315 | 3857 | 0.0001793 | 29015 solute carrier family 43, member 3                                  |
| GO integral to membrane | 315 | 3857 | 0.0001793 | 29103 DnaJ (Hsp40) homolog, subfamily C, member 15                        |
| GO integral to membrane | 315 | 3857 | 0.0001793 | 29126 CD274 molecule                                                      |
| GO integral to membrane | 315 | 3857 | 0.0001793 | 3134 major histocompatibility complex, class I, F                         |
| GO integral to membrane | 315 | 3857 | 0.0001793 | 3294 hydroxysteroid (17-beta) dehydrogenase 2                             |
| GO integral to membrane | 315 | 3857 | 0.0001793 | 338557 G protein-coupled receptor 120                                     |
| GO integral to membrane | 315 | 3857 | 0.0001793 | 342035 gliomedin                                                          |
| GO integral to membrane | 315 | 3857 | 0.0001793 | 3429 interferon, alpha-inducible protein 27                               |
| GO integral to membrane | 315 | 3857 | 0.0001793 | 343450 potassium channel, subfamily T, member 2                           |
| GO integral to membrane | 315 | 3857 | 0.0001793 | 353345 G protein-coupled receptor 141                                     |
| GO integral to membrane | 315 | 3857 | 0.0001793 | 3570 interleukin 6 receptor                                               |
| GO integral to membrane | 315 | 3857 | 0.0001793 | 3587 interleukin 10 receptor, alpha                                       |
| GO integral to membrane | 315 | 3857 | 0.0001793 | 3601 interleukin 15 receptor, alpha                                       |
| GO integral to membrane | 315 | 3857 | 0.0001793 | 3678 integrin, alpha 5 (fibronectin receptor, alpha polypeptide)          |
| GO integral to membrane | 315 | 3857 | 0.0001793 | 368 ATP-binding cassette, sub-family C (CFTR/MRP), member 6               |
| GO integral to membrane | 315 | 3857 | 0.0001793 | 3687 integrin, alpha X (complement component 3 receptor 4 subunit)        |
| GO integral to membrane | 315 | 3857 | 0.0001793 | 3689 integrin, beta 2 (complement component 3 receptor 3 and 4 subunit)   |
| GO integral to membrane | 315 | 3857 | 0.0001793 | 3691 integrin, beta 4                                                     |
| GO integral to membrane | 315 | 3857 | 0.0001793 | 3696 integrin, beta 8                                                     |
| GO integral to membrane | 315 | 3857 | 0.0001793 | 3709 inositol 1,4,5-triphosphate receptor, type 2                         |
| GO integral to membrane | 315 | 3857 | 0.0001793 | 374378 UDP-N-acetyl-alpha-D-galactosamine:polypeptide N-acetylgalactosami |
| GO integral to membrane | 315 | 3857 | 0.0001793 | 375056 melanoma inhibitory activity family, member 3                      |
| GO integral to membrane | 315 | 3857 | 0.0001793 | 3773 potassium inwardly-rectifying channel, subfamily J, member 16        |
| GO integral to membrane | 315 | 3857 | 0.0001793 | 3775 potassium channel, subfamily K, member 1                             |
| GO integral to membrane | 315 | 3857 | 0.0001793 | 3782 potassium intermediate/small conductance calcium-activated channel,  |
| GO integral to membrane | 315 | 3857 | 0.0001793 | 3783 potassium intermediate/small conductance calcium-activated channel,  |
| GO integral to membrane | 315 | 3857 | 0.0001793 | 3786 potassium voltage-gated channel, KQT-like subfamily, member 3        |
| GO integral to membrane | 315 | 3857 | 0.0001793 | 378925 ring finger protein 148                                            |



|                         |     |      |           |                                                                            |
|-------------------------|-----|------|-----------|----------------------------------------------------------------------------|
| GO integral to membrane | 315 | 3857 | 0.0001793 | 3790 potassium voltage-gated channel, delayed-rectifier, subfamily S, memb |
| GO integral to membrane | 315 | 3857 | 0.0001793 | 3815 v-kit Hardy-Zuckerman 4 feline sarcoma viral oncogene homolog         |
| GO integral to membrane | 315 | 3857 | 0.0001793 | 3823 killer cell lectin-like receptor subfamily C, member 3                |
| GO integral to membrane | 315 | 3857 | 0.0001793 | 387509 G protein-coupled receptor 153                                      |
| GO integral to membrane | 315 | 3857 | 0.0001793 | 387923 stress-associated endoplasmic reticulum protein family member 2     |
| GO integral to membrane | 315 | 3857 | 0.0001793 | 388633 low density lipoprotein receptor class A domain containing 1        |
| GO integral to membrane | 315 | 3857 | 0.0001793 | 392392 olfactory receptor, family 1, subfamily K, member 1                 |
| GO integral to membrane | 315 | 3857 | 0.0001793 | 402415 XK, Kell blood group complex subunit-related, X-linked              |
| GO integral to membrane | 315 | 3857 | 0.0001793 | 4038 low density lipoprotein receptor-related protein 4                    |
| GO integral to membrane | 315 | 3857 | 0.0001793 | 4056 leukotriene C4 synthase                                               |
| GO integral to membrane | 315 | 3857 | 0.0001793 | 405753 dual oxidase maturation factor 2                                    |
| GO integral to membrane | 315 | 3857 | 0.0001793 | 412 steroid sulfatase (microsomal), isozyme S                              |
| GO integral to membrane | 315 | 3857 | 0.0001793 | 4121 mannosidase, alpha, class 1A, member 1                                |
| GO integral to membrane | 315 | 3857 | 0.0001793 | 4128 monoamine oxidase A                                                   |
| GO integral to membrane | 315 | 3857 | 0.0001793 | 4129 monoamine oxidase B                                                   |
| GO integral to membrane | 315 | 3857 | 0.0001793 | 4170 myeloid cell leukemia sequence 1 (BCL2-related)                       |
| GO integral to membrane | 315 | 3857 | 0.0001793 | 4254 KIT ligand                                                            |
| GO integral to membrane | 315 | 3857 | 0.0001793 | 4684 neural cell adhesion molecule 1                                       |
| GO integral to membrane | 315 | 3857 | 0.0001793 | 4851 Notch homolog 1, translocation-associated (Drosophila)                |
| GO integral to membrane | 315 | 3857 | 0.0001793 | 50617 ATPase, H+ transporting, lysosomal V0 subunit a4                     |
| GO integral to membrane | 315 | 3857 | 0.0001793 | 5066 peptidylglycine alpha-amidating monooxygenase                         |
| GO integral to membrane | 315 | 3857 | 0.0001793 | 50937 Cdon homolog (mouse)                                                 |
| GO integral to membrane | 315 | 3857 | 0.0001793 | 51063 calcium homeostasis modulator 2                                      |
| GO integral to membrane | 315 | 3857 | 0.0001793 | 51093 chromosome 1 open reading frame 66                                   |
| GO integral to membrane | 315 | 3857 | 0.0001793 | 51272 blocked early in transport 1 homolog (S. cerevisiae)-like            |
| GO integral to membrane | 315 | 3857 | 0.0001793 | 51303 FK506 binding protein 11, 19 kDa                                     |
| GO integral to membrane | 315 | 3857 | 0.0001793 | 51309 armadillo repeat containing, X-linked 1                              |
| GO integral to membrane | 315 | 3857 | 0.0001793 | 51313 family with sequence similarity 198, member B                        |
| GO integral to membrane | 315 | 3857 | 0.0001793 | 51703 acyl-CoA synthetase long-chain family member 5                       |
| GO integral to membrane | 315 | 3857 | 0.0001793 | 51754 transmembrane protein 8B                                             |
| GO integral to membrane | 315 | 3857 | 0.0001793 | 5243 ATP-binding cassette, sub-family B (MDR/TAP), member 1                |
| GO integral to membrane | 315 | 3857 | 0.0001793 | 5318 plakophilin 2                                                         |
| GO integral to membrane | 315 | 3857 | 0.0001793 | 53373 two pore segment channel 1                                           |
| GO integral to membrane | 315 | 3857 | 0.0001793 | 53405 chloride intracellular channel 5                                     |
| GO integral to membrane | 315 | 3857 | 0.0001793 | 5362 plexin A2                                                             |
| GO integral to membrane | 315 | 3857 | 0.0001793 | 53827 FXFD domain containing ion transport regulator 5                     |

|                         |     |      |           |                                                                             |
|-------------------------|-----|------|-----------|-----------------------------------------------------------------------------|
| GO integral to membrane | 315 | 3857 | 0.0001793 | 53947 alpha 1,4-galactosyltransferase                                       |
| GO integral to membrane | 315 | 3857 | 0.0001793 | 54463 family with sequence similarity 134, member B                         |
| GO integral to membrane | 315 | 3857 | 0.0001793 | 54664 transmembrane protein 106B                                            |
| GO integral to membrane | 315 | 3857 | 0.0001793 | 54681 prolyl 4-hydroxylase, transmembrane (endoplasmic reticulum)           |
| GO integral to membrane | 315 | 3857 | 0.0001793 | 54852 progesterin and adipoQ receptor family member V                       |
| GO integral to membrane | 315 | 3857 | 0.0001793 | 54894 ring finger protein 43                                                |
| GO integral to membrane | 315 | 3857 | 0.0001793 | 54933 rhomboid, veinlet-like 2 (Drosophila)                                 |
| GO integral to membrane | 315 | 3857 | 0.0001793 | 54947 lysophosphatidylcholine acyltransferase 2                             |
| GO integral to membrane | 315 | 3857 | 0.0001793 | 55061 sushi domain containing 4                                             |
| GO integral to membrane | 315 | 3857 | 0.0001793 | 55076 transmembrane protein 45A                                             |
| GO integral to membrane | 315 | 3857 | 0.0001793 | 55080 TAP binding protein-like                                              |
| GO integral to membrane | 315 | 3857 | 0.0001793 | 55281 transmembrane protein 140                                             |
| GO integral to membrane | 315 | 3857 | 0.0001793 | 55304 serine palmitoyltransferase, long chain base subunit 3                |
| GO integral to membrane | 315 | 3857 | 0.0001793 | 55332 DNA-damage regulated autophagy modulator 1                            |
| GO integral to membrane | 315 | 3857 | 0.0001793 | 55365 transmembrane protein 176A                                            |
| GO integral to membrane | 315 | 3857 | 0.0001793 | 55638 Golgi-localized protein                                               |
| GO integral to membrane | 315 | 3857 | 0.0001793 | 55714 odz, odd Oz/ten-m homolog 3 (Drosophila)                              |
| GO integral to membrane | 315 | 3857 | 0.0001793 | 55754 transmembrane protein 30A                                             |
| GO integral to membrane | 315 | 3857 | 0.0001793 | 55799 calcium channel, voltage-dependent, alpha 2/delta subunit 3           |
| GO integral to membrane | 315 | 3857 | 0.0001793 | 55808 ST6 (alpha-N-acetyl-neuraminy-2,3-beta-galactosyl-1,3)-N-acetylgalact |
| GO integral to membrane | 315 | 3857 | 0.0001793 | 55824 phosphoprotein associated with glycosphingolipid microdomains 1       |
| GO integral to membrane | 315 | 3857 | 0.0001793 | 56172 ankylosis, progressive homolog (mouse)                                |
| GO integral to membrane | 315 | 3857 | 0.0001793 | 56649 transmembrane protease, serine 4                                      |
| GO integral to membrane | 315 | 3857 | 0.0001793 | 56654 neural proliferation, differentiation and control, 1                  |
| GO integral to membrane | 315 | 3857 | 0.0001793 | 56913 core 1 synthase, glycoprotein-N-acetylgalactosamine 3-beta-galactosyl |
| GO integral to membrane | 315 | 3857 | 0.0001793 | 56923 neuromedin U receptor 2                                               |
| GO integral to membrane | 315 | 3857 | 0.0001793 | 57104 patatin-like phospholipase domain containing 2                        |
| GO integral to membrane | 315 | 3857 | 0.0001793 | 57134 mannosidase, alpha, class 1C, member 1                                |
| GO integral to membrane | 315 | 3857 | 0.0001793 | 57146 transmembrane protein 159                                             |
| GO integral to membrane | 315 | 3857 | 0.0001793 | 57185 NIPA-like domain containing 3                                         |
| GO integral to membrane | 315 | 3857 | 0.0001793 | 57210 solute carrier family 45, member 4                                    |
| GO integral to membrane | 315 | 3857 | 0.0001793 | 57221 KIAA1244                                                              |
| GO integral to membrane | 315 | 3857 | 0.0001793 | 5724 platelet-activating factor receptor                                    |
| GO integral to membrane | 315 | 3857 | 0.0001793 | 5734 prostaglandin E receptor 4 (subtype EP4)                               |
| GO integral to membrane | 315 | 3857 | 0.0001793 | 57453 Down syndrome cell adhesion molecule like 1                           |
| GO integral to membrane | 315 | 3857 | 0.0001793 | 57458 transmembrane and coiled-coil domain family 3                         |

|                         |     |      |           |                                                                                 |
|-------------------------|-----|------|-----------|---------------------------------------------------------------------------------|
| GO integral to membrane | 315 | 3857 | 0.0001793 | 57488 extended synaptotagmin-like protein 2                                     |
| GO integral to membrane | 315 | 3857 | 0.0001793 | 57493 HEG homolog 1 (zebrafish)                                                 |
| GO integral to membrane | 315 | 3857 | 0.0001793 | 57512 G protein-coupled receptor 158                                            |
| GO integral to membrane | 315 | 3857 | 0.0001793 | 57535 KIAA1324                                                                  |
| GO integral to membrane | 315 | 3857 | 0.0001793 | 57537 sortilin-related VPS10 domain containing receptor 2                       |
| GO integral to membrane | 315 | 3857 | 0.0001793 | 57620 stromal interaction molecule 2                                            |
| GO integral to membrane | 315 | 3857 | 0.0001793 | 57670 KIAA1549                                                                  |
| GO integral to membrane | 315 | 3857 | 0.0001793 | 5768 quiescin Q6 sulfhydryl oxidase 1                                           |
| GO integral to membrane | 315 | 3857 | 0.0001793 | 57863 cell adhesion molecule 3                                                  |
| GO integral to membrane | 315 | 3857 | 0.0001793 | 5791 protein tyrosine phosphatase, receptor type, E                             |
| GO integral to membrane | 315 | 3857 | 0.0001793 | 5801 protein tyrosine phosphatase, receptor type, R                             |
| GO integral to membrane | 315 | 3857 | 0.0001793 | 59271 chromosome 21 open reading frame 63                                       |
| GO integral to membrane | 315 | 3857 | 0.0001793 | 6238 ribosome binding protein 1 homolog 180kDa (dog)                            |
| GO integral to membrane | 315 | 3857 | 0.0001793 | 63027 solute carrier family 22, member 23                                       |
| GO integral to membrane | 315 | 3857 | 0.0001793 | 6330 sodium channel, voltage-gated, type IV, beta                               |
| GO integral to membrane | 315 | 3857 | 0.0001793 | 63982 anoctamin 3                                                               |
| GO integral to membrane | 315 | 3857 | 0.0001793 | 64108 receptor (chemosensory) transporter protein 4                             |
| GO integral to membrane | 315 | 3857 | 0.0001793 | 64116 solute carrier family 39 (zinc transporter), member 8                     |
| GO integral to membrane | 315 | 3857 | 0.0001793 | 646658 transmembrane protein 90A                                                |
| GO integral to membrane | 315 | 3857 | 0.0001793 | 64699 transmembrane protease, serine 3                                          |
| GO integral to membrane | 315 | 3857 | 0.0001793 | 6484 ST3 beta-galactoside alpha-2,3-sialyltransferase 4                         |
| GO integral to membrane | 315 | 3857 | 0.0001793 | 6489 ST8 alpha-N-acetyl-neuraminide alpha-2,8-sialyltransferase 1               |
| GO integral to membrane | 315 | 3857 | 0.0001793 | 6535 solute carrier family 6 (neurotransmitter transporter, creatine), member 1 |
| GO integral to membrane | 315 | 3857 | 0.0001793 | 654463 fer-1-like 6 (C. elegans)                                                |
| GO integral to membrane | 315 | 3857 | 0.0001793 | 682 basigin (Ok blood group)                                                    |
| GO integral to membrane | 315 | 3857 | 0.0001793 | 6857 synaptotagmin I                                                            |
| GO integral to membrane | 315 | 3857 | 0.0001793 | 6916 thromboxane A synthase 1 (platelet)                                        |
| GO integral to membrane | 315 | 3857 | 0.0001793 | 7100 toll-like receptor 5                                                       |
| GO integral to membrane | 315 | 3857 | 0.0001793 | 7133 tumor necrosis factor receptor superfamily, member 1B                      |
| GO integral to membrane | 315 | 3857 | 0.0001793 | 7223 transient receptor potential cation channel, subfamily C, member 4         |
| GO integral to membrane | 315 | 3857 | 0.0001793 | 727910 TLC domain containing 2                                                  |
| GO integral to membrane | 315 | 3857 | 0.0001793 | 728215 family with sequence similarity 155, member A                            |
| GO integral to membrane | 315 | 3857 | 0.0001793 | 729993 shisa homolog 9 (Xenopus laevis)                                         |
| GO integral to membrane | 315 | 3857 | 0.0001793 | 731 complement component 8, alpha polypeptide                                   |
| GO integral to membrane | 315 | 3857 | 0.0001793 | 771 carbonic anhydrase XII                                                      |
| GO integral to membrane | 315 | 3857 | 0.0001793 | 774 calcium channel, voltage-dependent, N type, alpha 1B subunit                |

|                         |     |      |           |                                                                            |
|-------------------------|-----|------|-----------|----------------------------------------------------------------------------|
| GO integral to membrane | 315 | 3857 | 0.0001793 | 7852 chemokine (C-X-C motif) receptor 4                                    |
| GO integral to membrane | 315 | 3857 | 0.0001793 | 79152 fatty acid 2-hydroxylase                                             |
| GO integral to membrane | 315 | 3857 | 0.0001793 | 79689 STEAP family member 4                                                |
| GO integral to membrane | 315 | 3857 | 0.0001793 | 79695 UDP-N-acetyl-alpha-D-galactosamine:polypeptide N-acetylgalactosami   |
| GO integral to membrane | 315 | 3857 | 0.0001793 | 79789 calmin (calponin-like, transmembrane)                                |
| GO integral to membrane | 315 | 3857 | 0.0001793 | 79820 cation channel, sperm-associated, beta                               |
| GO integral to membrane | 315 | 3857 | 0.0001793 | 79838 transmembrane channel-like 5                                         |
| GO integral to membrane | 315 | 3857 | 0.0001793 | 79895 ATPase, class I, type 8B, member 4                                   |
| GO integral to membrane | 315 | 3857 | 0.0001793 | 79932 KIAA0319-like                                                        |
| GO integral to membrane | 315 | 3857 | 0.0001793 | 79956 endoplasmic reticulum metalloproteinase 1                            |
| GO integral to membrane | 315 | 3857 | 0.0001793 | 79957 progesterin and adipoQ receptor family member VI                     |
| GO integral to membrane | 315 | 3857 | 0.0001793 | 79971 wntless homolog (Drosophila)                                         |
| GO integral to membrane | 315 | 3857 | 0.0001793 | 81285 olfactory receptor, family 51, subfamily E, member 2                 |
| GO integral to membrane | 315 | 3857 | 0.0001793 | 81470 olfactory receptor, family 2, subfamily G, member 2                  |
| GO integral to membrane | 315 | 3857 | 0.0001793 | 81544 glycerophosphodiester phosphodiesterase domain containing 5          |
| GO integral to membrane | 315 | 3857 | 0.0001793 | 81615 transmembrane protein 163                                            |
| GO integral to membrane | 315 | 3857 | 0.0001793 | 81693 amnionless homolog (mouse)                                           |
| GO integral to membrane | 315 | 3857 | 0.0001793 | 819 calcium modulating ligand                                              |
| GO integral to membrane | 315 | 3857 | 0.0001793 | 83394 PITPNM family member 3                                               |
| GO integral to membrane | 315 | 3857 | 0.0001793 | 83604 transmembrane protein 47                                             |
| GO integral to membrane | 315 | 3857 | 0.0001793 | 83661 membrane-spanning 4-domains, subfamily A, member 8B                  |
| GO integral to membrane | 315 | 3857 | 0.0001793 | 83857 transmembrane and tetratricopeptide repeat containing 1              |
| GO integral to membrane | 315 | 3857 | 0.0001793 | 83890 spermatogenesis associated 9                                         |
| GO integral to membrane | 315 | 3857 | 0.0001793 | 84059 G protein-coupled receptor 98                                        |
| GO integral to membrane | 315 | 3857 | 0.0001793 | 84561 solute carrier family 12 (potassium/chloride transporters), member 8 |
| GO integral to membrane | 315 | 3857 | 0.0001793 | 84879 major facilitator superfamily domain containing 2A                   |
| GO integral to membrane | 315 | 3857 | 0.0001793 | 84976 dispatched homolog 1 (Drosophila)                                    |
| GO integral to membrane | 315 | 3857 | 0.0001793 | 8509 N-deacetylase/N-sulfotransferase (heparan glucosaminyl) 2             |
| GO integral to membrane | 315 | 3857 | 0.0001793 | 8514 potassium voltage-gated channel, shaker-related subfamily, beta mem   |
| GO integral to membrane | 315 | 3857 | 0.0001793 | 8519 interferon induced transmembrane protein 1 (9-27)                     |
| GO integral to membrane | 315 | 3857 | 0.0001793 | 8673 vesicle-associated membrane protein 8 (endobrevin)                    |
| GO integral to membrane | 315 | 3857 | 0.0001793 | 8706 beta-1,3-N-acetylgalactosaminyltransferase 1 (globoside blood group)  |
| GO integral to membrane | 315 | 3857 | 0.0001793 | 8740 tumor necrosis factor (ligand) superfamily, member 14                 |
| GO integral to membrane | 315 | 3857 | 0.0001793 | 8744 tumor necrosis factor (ligand) superfamily, member 9                  |
| GO integral to membrane | 315 | 3857 | 0.0001793 | 8751 ADAM metalloproteinase domain 15                                      |
| GO integral to membrane | 315 | 3857 | 0.0001793 | 8793 tumor necrosis factor receptor superfamily, member 10d, decoy with t  |

|                                      |     |      |           |                                                                     |
|--------------------------------------|-----|------|-----------|---------------------------------------------------------------------|
| GO integral to membrane              | 315 | 3857 | 0.0001793 | 8911 calcium channel, voltage-dependent, T type, alpha 1I subunit   |
| GO integral to membrane              | 315 | 3857 | 0.0001793 | 8912 calcium channel, voltage-dependent, T type, alpha 1H subunit   |
| GO integral to membrane              | 315 | 3857 | 0.0001793 | 8973 cholinergic receptor, nicotinic, alpha 6                       |
| GO integral to membrane              | 315 | 3857 | 0.0001793 | 89801 protein phosphatase 1, regulatory (inhibitor) subunit 3F      |
| GO integral to membrane              | 315 | 3857 | 0.0001793 | 8992 ATPase, H+ transporting, lysosomal 9kDa, V0 subunit e1         |
| GO integral to membrane              | 315 | 3857 | 0.0001793 | 9071 claudin 10                                                     |
| GO integral to membrane              | 315 | 3857 | 0.0001793 | 90993 cAMP responsive element binding protein 3-like 1              |
| GO integral to membrane              | 315 | 3857 | 0.0001793 | 91653 Boc homolog (mouse)                                           |
| GO integral to membrane              | 315 | 3857 | 0.0001793 | 9214 Fas apoptotic inhibitory molecule 3                            |
| GO integral to membrane              | 315 | 3857 | 0.0001793 | 92691 transmembrane protein 169                                     |
| GO integral to membrane              | 315 | 3857 | 0.0001793 | 92840 receptor accessory protein 6                                  |
| GO integral to membrane              | 315 | 3857 | 0.0001793 | 93273 LEM domain containing 1                                       |
| GO integral to membrane              | 315 | 3857 | 0.0001793 | 93589 calcium channel, voltage-dependent, alpha 2/delta subunit 4   |
| GO integral to membrane              | 315 | 3857 | 0.0001793 | 94025 mucin 16, cell surface associated                             |
| GO integral to membrane              | 315 | 3857 | 0.0001793 | 9435 carbohydrate (N-acetylglucosamine-6-O) sulfotransferase 2      |
| GO integral to membrane              | 315 | 3857 | 0.0001793 | 9445 integral membrane protein 2B                                   |
| GO integral to membrane              | 315 | 3857 | 0.0001793 | 9452 integral membrane protein 2A                                   |
| GO integral to membrane              | 315 | 3857 | 0.0001793 | 9481 solute carrier family 25, member 27                            |
| GO integral to membrane              | 315 | 3857 | 0.0001793 | 952 CD38 molecule                                                   |
| GO integral to membrane              | 315 | 3857 | 0.0001793 | 9537 tumor protein p53 inducible protein 11                         |
| GO integral to membrane              | 315 | 3857 | 0.0001793 | 9804 translocase of outer mitochondrial membrane 20 homolog (yeast) |
| GO integral to membrane              | 315 | 3857 | 0.0001793 | 9823 armadillo repeat containing, X-linked 2                        |
| GO integral to membrane              | 315 | 3857 | 0.0001793 | 9914 ATPase, Ca++ transporting, type 2C, member 2                   |
| GO integral to membrane              | 315 | 3857 | 0.0001793 | 9962 solute carrier family 23 (nucleobase transporters), member 2   |
| GO integral to membrane              | 315 | 3857 | 0.0001793 | 9966 tumor necrosis factor (ligand) superfamily, member 15          |
| GO rhythmic process                  | 6   | 14   | 0.0001877 | 1628 D site of albumin promoter (albumin D-box) binding protein     |
| GO rhythmic process                  | 6   | 14   | 0.0001877 | 3131 hepatic leukemia factor                                        |
| GO rhythmic process                  | 6   | 14   | 0.0001877 | 4783 nuclear factor, interleukin 3 regulated                        |
| GO rhythmic process                  | 6   | 14   | 0.0001877 | 55068 ecto-NOX disulfide-thiol exchanger 1                          |
| GO rhythmic process                  | 6   | 14   | 0.0001877 | 7008 thyrotrophic embryonic factor                                  |
| GO rhythmic process                  | 6   | 14   | 0.0001877 | 8863 period homolog 3 (Drosophila)                                  |
| GO steroid hormone receptor activity | 11  | 46   | 0.0002101 | 3164 nuclear receptor subfamily 4, group A, member 1                |
| GO steroid hormone receptor activity | 11  | 46   | 0.0002101 | 4306 nuclear receptor subfamily 3, group C, member 2                |
| GO steroid hormone receptor activity | 11  | 46   | 0.0002101 | 4929 nuclear receptor subfamily 4, group A, member 2                |
| GO steroid hormone receptor activity | 11  | 46   | 0.0002101 | 5465 peroxisome proliferator-activated receptor alpha               |
| GO steroid hormone receptor activity | 11  | 46   | 0.0002101 | 6096 RAR-related orphan receptor B                                  |

|                                             |    |     |           |                                                                                |
|---------------------------------------------|----|-----|-----------|--------------------------------------------------------------------------------|
| GO steroid hormone receptor activity        | 11 | 46  | 0.0002101 | 6097 RAR-related orphan receptor C                                             |
| GO steroid hormone receptor activity        | 11 | 46  | 0.0002101 | 6256 retinoid X receptor, alpha                                                |
| GO steroid hormone receptor activity        | 11 | 46  | 0.0002101 | 7026 nuclear receptor subfamily 2, group F, member 2                           |
| GO steroid hormone receptor activity        | 11 | 46  | 0.0002101 | 8013 nuclear receptor subfamily 4, group A, member 3                           |
| GO steroid hormone receptor activity        | 11 | 46  | 0.0002101 | 9572 nuclear receptor subfamily 1, group D, member 1                           |
| GO steroid hormone receptor activity        | 11 | 46  | 0.0002101 | 9971 nuclear receptor subfamily 1, group H, member 4                           |
| GO positive regulation of NF-kappaB trans   | 11 | 47  | 0.0002576 | 11213 interleukin-1 receptor-associated kinase 3                               |
| GO positive regulation of NF-kappaB trans   | 11 | 47  | 0.0002576 | 183 angiotensinogen (serpin peptidase inhibitor, clade A, member 8)            |
| GO positive regulation of NF-kappaB trans   | 11 | 47  | 0.0002576 | 29108 PYD and CARD domain containing                                           |
| GO positive regulation of NF-kappaB trans   | 11 | 47  | 0.0002576 | 3569 interleukin 6 (interferon, beta 2)                                        |
| GO positive regulation of NF-kappaB trans   | 11 | 47  | 0.0002576 | 3570 interleukin 6 receptor                                                    |
| GO positive regulation of NF-kappaB trans   | 11 | 47  | 0.0002576 | 3845 v-Ki-ras2 Kirsten rat sarcoma viral oncogene homolog                      |
| GO positive regulation of NF-kappaB trans   | 11 | 47  | 0.0002576 | 64127 nucleotide-binding oligomerization domain containing 2                   |
| GO positive regulation of NF-kappaB trans   | 11 | 47  | 0.0002576 | 7097 toll-like receptor 2                                                      |
| GO positive regulation of NF-kappaB trans   | 11 | 47  | 0.0002576 | 7098 toll-like receptor 3                                                      |
| GO positive regulation of NF-kappaB trans   | 11 | 47  | 0.0002576 | 7099 toll-like receptor 4                                                      |
| GO positive regulation of NF-kappaB trans   | 11 | 47  | 0.0002576 | 7474 wntless-type MMTV integration site family, member 5A                      |
| GO negative regulation of fibroblast growth | 4  | 6   | 0.0002914 | 10252 sprouty homolog 1, antagonist of FGF signaling (Drosophila)              |
| GO negative regulation of fibroblast growth | 4  | 6   | 0.0002914 | 10253 sprouty homolog 2 (Drosophila)                                           |
| GO negative regulation of fibroblast growth | 4  | 6   | 0.0002914 | 54361 wntless-type MMTV integration site family, member 4                      |
| GO negative regulation of fibroblast growth | 4  | 6   | 0.0002914 | 7474 wntless-type MMTV integration site family, member 5A                      |
| GO cardiac muscle cell proliferation        | 4  | 6   | 0.0002914 | 2296 forkhead box C1                                                           |
| GO cardiac muscle cell proliferation        | 4  | 6   | 0.0002914 | 2303 forkhead box C2 (MFH-1, mesenchyme forkhead 1)                            |
| GO cardiac muscle cell proliferation        | 4  | 6   | 0.0002914 | 6256 retinoid X receptor, alpha                                                |
| GO cardiac muscle cell proliferation        | 4  | 6   | 0.0002914 | 7049 transforming growth factor, beta receptor III                             |
| GO pathogen-associated molecular pattern    | 4  | 6   | 0.0002914 | 7097 toll-like receptor 2                                                      |
| GO pathogen-associated molecular pattern    | 4  | 6   | 0.0002914 | 7098 toll-like receptor 3                                                      |
| GO pathogen-associated molecular pattern    | 4  | 6   | 0.0002914 | 7099 toll-like receptor 4                                                      |
| GO pathogen-associated molecular pattern    | 4  | 6   | 0.0002914 | 7100 toll-like receptor 5                                                      |
| GO transcription repressor activity         | 25 | 173 | 0.0003036 | 116113 forkhead box P4                                                         |
| GO transcription repressor activity         | 25 | 173 | 0.0003036 | 127343 diencephalon/mesencephalon homeobox 1                                   |
| GO transcription repressor activity         | 25 | 173 | 0.0003036 | 150094 salt-inducible kinase 1                                                 |
| GO transcription repressor activity         | 25 | 173 | 0.0003036 | 1999 E74-like factor 3 (ets domain transcription factor, epithelial-specific ) |
| GO transcription repressor activity         | 25 | 173 | 0.0003036 | 2117 ets variant 3                                                             |
| GO transcription repressor activity         | 25 | 173 | 0.0003036 | 2290 forkhead box G1                                                           |
| GO transcription repressor activity         | 25 | 173 | 0.0003036 | 22904 strawberry notch homolog 2 (Drosophila)                                  |

|                                           |    |     |           |                                                                             |
|-------------------------------------------|----|-----|-----------|-----------------------------------------------------------------------------|
| GO transcription repressor activity       | 25 | 173 | 0.0003036 | 2737 GLI family zinc finger 3                                               |
| GO transcription repressor activity       | 25 | 173 | 0.0003036 | 3400 inhibitor of DNA binding 4, dominant negative helix-loop-helix protein |
| GO transcription repressor activity       | 25 | 173 | 0.0003036 | 3428 interferon, gamma-inducible protein 16                                 |
| GO transcription repressor activity       | 25 | 173 | 0.0003036 | 3725 jun oncogene                                                           |
| GO transcription repressor activity       | 25 | 173 | 0.0003036 | 4204 methyl CpG binding protein 2 (Rett syndrome)                           |
| GO transcription repressor activity       | 25 | 173 | 0.0003036 | 5083 paired box 9                                                           |
| GO transcription repressor activity       | 25 | 173 | 0.0003036 | 51085 MLX interacting protein-like                                          |
| GO transcription repressor activity       | 25 | 173 | 0.0003036 | 5371 promyelocytic leukemia                                                 |
| GO transcription repressor activity       | 25 | 173 | 0.0003036 | 5396 paired related homeobox 1                                              |
| GO transcription repressor activity       | 25 | 173 | 0.0003036 | 604 B-cell CLL/lymphoma 6                                                   |
| GO transcription repressor activity       | 25 | 173 | 0.0003036 | 652 bone morphogenetic protein 4                                            |
| GO transcription repressor activity       | 25 | 173 | 0.0003036 | 7227 trichorhinophalangeal syndrome I                                       |
| GO transcription repressor activity       | 25 | 173 | 0.0003036 | 83595 SRY (sex determining region Y)-box 7                                  |
| GO transcription repressor activity       | 25 | 173 | 0.0003036 | 84159 AT rich interactive domain 5B (MRF1-like)                             |
| GO transcription repressor activity       | 25 | 173 | 0.0003036 | 84911 zinc finger protein 382                                               |
| GO transcription repressor activity       | 25 | 173 | 0.0003036 | 8553 basic helix-loop-helix family, member e40                              |
| GO transcription repressor activity       | 25 | 173 | 0.0003036 | 9314 Kruppel-like factor 4 (gut)                                            |
| GO transcription repressor activity       | 25 | 173 | 0.0003036 | 9734 histone deacetylase 9                                                  |
| GO piRNA binding                          | 3  | 3   | 0.0003186 | 143689 piwi-like 4 (Drosophila)                                             |
| GO piRNA binding                          | 3  | 3   | 0.0003186 | 55124 piwi-like 2 (Drosophila)                                              |
| GO piRNA binding                          | 3  | 3   | 0.0003186 | 9271 piwi-like 1 (Drosophila)                                               |
| GO insulin-like growth factor binding pro | 3  | 3   | 0.0003186 | 3479 insulin-like growth factor 1 (somatomedin C)                           |
| GO insulin-like growth factor binding pro | 3  | 3   | 0.0003186 | 3486 insulin-like growth factor binding protein 3                           |
| GO insulin-like growth factor binding pro | 3  | 3   | 0.0003186 | 3488 insulin-like growth factor binding protein 5                           |
| GO mesodermal cell fate determination     | 3  | 3   | 0.0003186 | 652 bone morphogenetic protein 4                                            |
| GO mesodermal cell fate determination     | 3  | 3   | 0.0003186 | 89870 tripartite motif-containing 15                                        |
| GO mesodermal cell fate determination     | 3  | 3   | 0.0003186 | 9314 Kruppel-like factor 4 (gut)                                            |
| GO positive regulation of macrophage cy   | 3  | 3   | 0.0003186 | 7097 toll-like receptor 2                                                   |
| GO positive regulation of macrophage cy   | 3  | 3   | 0.0003186 | 7099 toll-like receptor 4                                                   |
| GO positive regulation of macrophage cy   | 3  | 3   | 0.0003186 | 7474 wingless-type MMTV integration site family, member 5A                  |
| GO response to glucose stimulus           | 12 | 57  | 0.0003935 | 10628 thioredoxin interacting protein                                       |
| GO response to glucose stimulus           | 12 | 57  | 0.0003935 | 130399 activin A receptor, type IC                                          |
| GO response to glucose stimulus           | 12 | 57  | 0.0003935 | 1508 cathepsin B                                                            |
| GO response to glucose stimulus           | 12 | 57  | 0.0003935 | 1958 early growth response 1                                                |
| GO response to glucose stimulus           | 12 | 57  | 0.0003935 | 2033 E1A binding protein p300                                               |
| GO response to glucose stimulus           | 12 | 57  | 0.0003935 | 2752 glutamate-ammonia ligase (glutamine synthetase)                        |

|                                            |    |    |           |                                                                               |
|--------------------------------------------|----|----|-----------|-------------------------------------------------------------------------------|
| GO response to glucose stimulus            | 12 | 57 | 0.0003935 | 3643 insulin receptor                                                         |
| GO response to glucose stimulus            | 12 | 57 | 0.0003935 | 4087 SMAD family member 2                                                     |
| GO response to glucose stimulus            | 12 | 57 | 0.0003935 | 5122 proprotein convertase subtilisin/kexin type 1                            |
| GO response to glucose stimulus            | 12 | 57 | 0.0003935 | 51703 acyl-CoA synthetase long-chain family member 5                          |
| GO response to glucose stimulus            | 12 | 57 | 0.0003935 | 8660 insulin receptor substrate 2                                             |
| GO response to glucose stimulus            | 12 | 57 | 0.0003935 | 9971 nuclear receptor subfamily 1, group H, member 4                          |
| GO ligand-dependent nuclear receptor a     | 8  | 28 | 0.0004214 | 3164 nuclear receptor subfamily 4, group A, member 1                          |
| GO ligand-dependent nuclear receptor a     | 8  | 28 | 0.0004214 | 4929 nuclear receptor subfamily 4, group A, member 2                          |
| GO ligand-dependent nuclear receptor a     | 8  | 28 | 0.0004214 | 5465 peroxisome proliferator-activated receptor alpha                         |
| GO ligand-dependent nuclear receptor a     | 8  | 28 | 0.0004214 | 6096 RAR-related orphan receptor B                                            |
| GO ligand-dependent nuclear receptor a     | 8  | 28 | 0.0004214 | 6097 RAR-related orphan receptor C                                            |
| GO ligand-dependent nuclear receptor a     | 8  | 28 | 0.0004214 | 7026 nuclear receptor subfamily 2, group F, member 2                          |
| GO ligand-dependent nuclear receptor a     | 8  | 28 | 0.0004214 | 9572 nuclear receptor subfamily 1, group D, member 1                          |
| GO ligand-dependent nuclear receptor a     | 8  | 28 | 0.0004214 | 9971 nuclear receptor subfamily 1, group H, member 4                          |
| GO response to light stimulus              | 6  | 16 | 0.0004444 | 1813 dopamine receptor D2                                                     |
| GO response to light stimulus              | 6  | 16 | 0.0004444 | 1843 dual specificity phosphatase 1                                           |
| GO response to light stimulus              | 6  | 16 | 0.0004444 | 2353 FBJ murine osteosarcoma viral oncogene homolog                           |
| GO response to light stimulus              | 6  | 16 | 0.0004444 | 3726 jun B proto-oncogene                                                     |
| GO response to light stimulus              | 6  | 16 | 0.0004444 | 5187 period homolog 1 (Drosophila)                                            |
| GO response to light stimulus              | 6  | 16 | 0.0004444 | 8553 basic helix-loop-helix family, member e40                                |
| GO positive regulation of gene-specific tr | 16 | 92 | 0.0004655 | 10014 histone deacetylase 5                                                   |
| GO positive regulation of gene-specific tr | 16 | 92 | 0.0004655 | 22807 IKAROS family zinc finger 2 (Helios)                                    |
| GO positive regulation of gene-specific tr | 16 | 92 | 0.0004655 | 2624 GATA binding protein 2                                                   |
| GO positive regulation of gene-specific tr | 16 | 92 | 0.0004655 | 2737 GLI family zinc finger 3                                                 |
| GO positive regulation of gene-specific tr | 16 | 92 | 0.0004655 | 3169 forkhead box A1                                                          |
| GO positive regulation of gene-specific tr | 16 | 92 | 0.0004655 | 3175 one cut homeobox 1                                                       |
| GO positive regulation of gene-specific tr | 16 | 92 | 0.0004655 | 3479 insulin-like growth factor 1 (somatomedin C)                             |
| GO positive regulation of gene-specific tr | 16 | 92 | 0.0004655 | 4784 nuclear factor I/X (CCAAT-binding transcription factor)                  |
| GO positive regulation of gene-specific tr | 16 | 92 | 0.0004655 | 4792 nuclear factor of kappa light polypeptide gene enhancer in B-cells inhib |
| GO positive regulation of gene-specific tr | 16 | 92 | 0.0004655 | 51085 MLX interacting protein-like                                            |
| GO positive regulation of gene-specific tr | 16 | 92 | 0.0004655 | 5460 POU class 5 homeobox 1                                                   |
| GO positive regulation of gene-specific tr | 16 | 92 | 0.0004655 | 6256 retinoid X receptor, alpha                                               |
| GO positive regulation of gene-specific tr | 16 | 92 | 0.0004655 | 652 bone morphogenetic protein 4                                              |
| GO positive regulation of gene-specific tr | 16 | 92 | 0.0004655 | 7097 toll-like receptor 2                                                     |
| GO positive regulation of gene-specific tr | 16 | 92 | 0.0004655 | 7098 toll-like receptor 3                                                     |
| GO positive regulation of gene-specific tr | 16 | 92 | 0.0004655 | 7099 toll-like receptor 4                                                     |



|    |                                         |     |      |           |                                                                           |
|----|-----------------------------------------|-----|------|-----------|---------------------------------------------------------------------------|
| GO | positive regulation of smooth muscle    | 8   | 29   | 0.0005473 | 1906 endothelin 1                                                         |
| GO | positive regulation of smooth muscle    | 8   | 29   | 0.0005473 | 27035 NADPH oxidase 1                                                     |
| GO | positive regulation of smooth muscle    | 8   | 29   | 0.0005473 | 3479 insulin-like growth factor 1 (somatomedin C)                         |
| GO | positive regulation of smooth muscle    | 8   | 29   | 0.0005473 | 3569 interleukin 6 (interferon, beta 2)                                   |
| GO | positive regulation of smooth muscle    | 8   | 29   | 0.0005473 | 3570 interleukin 6 receptor                                               |
| GO | positive regulation of smooth muscle    | 8   | 29   | 0.0005473 | 3725 jun oncogene                                                         |
| GO | positive regulation of smooth muscle    | 8   | 29   | 0.0005473 | 4889 neuropeptide Y receptor Y5                                           |
| GO | positive regulation of smooth muscle    | 8   | 29   | 0.0005473 | 652 bone morphogenetic protein 4                                          |
| GO | positive regulation of osteoclast diffe | 4   | 7    | 0.000643  | 1435 colony stimulating factor 1 (macrophage)                             |
| GO | positive regulation of osteoclast diffe | 4   | 7    | 0.000643  | 7071 Kruppel-like factor 10                                               |
| GO | positive regulation of osteoclast diffe | 4   | 7    | 0.000643  | 760 carbonic anhydrase II                                                 |
| GO | positive regulation of osteoclast diffe | 4   | 7    | 0.000643  | 8600 tumor necrosis factor (ligand) superfamily, member 11                |
| GO | negative regulation of cell death       | 4   | 7    | 0.000643  | 1508 cathepsin B                                                          |
| GO | negative regulation of cell death       | 4   | 7    | 0.000643  | 4851 Notch homolog 1, translocation-associated (Drosophila)               |
| GO | negative regulation of cell death       | 4   | 7    | 0.000643  | 5071 Parkinson disease (autosomal recessive, juvenile) 2, parkin          |
| GO | negative regulation of cell death       | 4   | 7    | 0.000643  | 652 bone morphogenetic protein 4                                          |
| GO | cellular response to lipopolysaccharic  | 4   | 7    | 0.000643  | 4056 leukotriene C4 synthase                                              |
| GO | cellular response to lipopolysaccharic  | 4   | 7    | 0.000643  | 7099 toll-like receptor 4                                                 |
| GO | cellular response to lipopolysaccharic  | 4   | 7    | 0.000643  | 7474 wingless-type MMTV integration site family, member 5A                |
| GO | cellular response to lipopolysaccharic  | 4   | 7    | 0.000643  | 929 CD14 molecule                                                         |
| GO | microglial cell activation during immu  | 4   | 7    | 0.000643  | 7097 toll-like receptor 2                                                 |
| GO | microglial cell activation during immu  | 4   | 7    | 0.000643  | 7098 toll-like receptor 3                                                 |
| GO | microglial cell activation during immu  | 4   | 7    | 0.000643  | 7099 toll-like receptor 4                                                 |
| GO | microglial cell activation during immu  | 4   | 7    | 0.000643  | 7100 toll-like receptor 5                                                 |
| GO | signal transduction                     | 157 | 1796 | 0.0006537 | 10156 RAS p21 protein activator 4                                         |
| GO | signal transduction                     | 157 | 1796 | 0.0006537 | 10253 sprouty homolog 2 (Drosophila)                                      |
| GO | signal transduction                     | 157 | 1796 | 0.0006537 | 10752 cell adhesion molecule with homology to L1CAM (close homolog of L1) |
| GO | signal transduction                     | 157 | 1796 | 0.0006537 | 10913 ectodysplasin A receptor                                            |
| GO | signal transduction                     | 157 | 1796 | 0.0006537 | 11213 interleukin-1 receptor-associated kinase 3                          |
| GO | signal transduction                     | 157 | 1796 | 0.0006537 | 11228 Ras association (RalGDS/AF-6) domain family (N-terminal) member 8   |
| GO | signal transduction                     | 157 | 1796 | 0.0006537 | 1124 chimerin (chimaerin) 2                                               |
| GO | signal transduction                     | 157 | 1796 | 0.0006537 | 1139 cholinergic receptor, nicotinic, alpha 7                             |
| GO | signal transduction                     | 157 | 1796 | 0.0006537 | 115330 G protein-coupled receptor 146                                     |
| GO | signal transduction                     | 157 | 1796 | 0.0006537 | 116984 ArfGAP with RhoGAP domain, ankyrin repeat and PH domain 2          |
| GO | signal transduction                     | 157 | 1796 | 0.0006537 | 1193 chloride intracellular channel 2                                     |
| GO | signal transduction                     | 157 | 1796 | 0.0006537 | 121130 olfactory receptor, family 10, subfamily P, member 1               |

|                        |     |      |           |                                                                           |
|------------------------|-----|------|-----------|---------------------------------------------------------------------------|
| GO signal transduction | 157 | 1796 | 0.0006537 | 1382 cellular retinoic acid binding protein 2                             |
| GO signal transduction | 157 | 1796 | 0.0006537 | 143503 olfactory receptor, family 51, subfamily E, member 1               |
| GO signal transduction | 157 | 1796 | 0.0006537 | 154 adrenergic, beta-2-, receptor, surface                                |
| GO signal transduction | 157 | 1796 | 0.0006537 | 1612 death-associated protein kinase 1                                    |
| GO signal transduction | 157 | 1796 | 0.0006537 | 1785 dynamin 2                                                            |
| GO signal transduction | 157 | 1796 | 0.0006537 | 1813 dopamine receptor D2                                                 |
| GO signal transduction | 157 | 1796 | 0.0006537 | 1815 dopamine receptor D4                                                 |
| GO signal transduction | 157 | 1796 | 0.0006537 | 1839 heparin-binding EGF-like growth factor                               |
| GO signal transduction | 157 | 1796 | 0.0006537 | 1901 sphingosine-1-phosphate receptor 1                                   |
| GO signal transduction | 157 | 1796 | 0.0006537 | 1902 lysophosphatidic acid receptor 1                                     |
| GO signal transduction | 157 | 1796 | 0.0006537 | 1969 EPH receptor A2                                                      |
| GO signal transduction | 157 | 1796 | 0.0006537 | 2015 egf-like module containing, mucin-like, hormone receptor-like 1      |
| GO signal transduction | 157 | 1796 | 0.0006537 | 2066 v-erb-a erythroblastic leukemia viral oncogene homolog 4 (avian)     |
| GO signal transduction | 157 | 1796 | 0.0006537 | 2205 Fc fragment of IgE, high affinity I, receptor for; alpha polypeptide |
| GO signal transduction | 157 | 1796 | 0.0006537 | 222545 G protein-coupled receptor, family C, group 6, member A            |
| GO signal transduction | 157 | 1796 | 0.0006537 | 22859 latrophilin 1                                                       |
| GO signal transduction | 157 | 1796 | 0.0006537 | 23092 Rho GTPase activating protein 26                                    |
| GO signal transduction | 157 | 1796 | 0.0006537 | 23179 ral guanine nucleotide dissociation stimulator-like 1               |
| GO signal transduction | 157 | 1796 | 0.0006537 | 23266 latrophilin 2                                                       |
| GO signal transduction | 157 | 1796 | 0.0006537 | 23284 latrophilin 3                                                       |
| GO signal transduction | 157 | 1796 | 0.0006537 | 23303 kinesin family member 13B                                           |
| GO signal transduction | 157 | 1796 | 0.0006537 | 23654 plexin B2                                                           |
| GO signal transduction | 157 | 1796 | 0.0006537 | 26191 protein tyrosine phosphatase, non-receptor type 22 (lymphoid)       |
| GO signal transduction | 157 | 1796 | 0.0006537 | 26281 fibroblast growth factor 20                                         |
| GO signal transduction | 157 | 1796 | 0.0006537 | 2642 glucagon receptor                                                    |
| GO signal transduction | 157 | 1796 | 0.0006537 | 27035 NADPH oxidase 1                                                     |
| GO signal transduction | 157 | 1796 | 0.0006537 | 27202 G protein-coupled receptor 77                                       |
| GO signal transduction | 157 | 1796 | 0.0006537 | 27242 tumor necrosis factor receptor superfamily, member 21               |
| GO signal transduction | 157 | 1796 | 0.0006537 | 2769 guanine nucleotide binding protein (G protein), alpha 15 (Gq class)  |
| GO signal transduction | 157 | 1796 | 0.0006537 | 283383 G protein-coupled receptor 133                                     |
| GO signal transduction | 157 | 1796 | 0.0006537 | 285704 RGM domain family, member B                                        |
| GO signal transduction | 157 | 1796 | 0.0006537 | 2861 G protein-coupled receptor 37 (endothelin receptor type B-like)      |
| GO signal transduction | 157 | 1796 | 0.0006537 | 2865 free fatty acid receptor 3                                           |
| GO signal transduction | 157 | 1796 | 0.0006537 | 2867 free fatty acid receptor 2                                           |
| GO signal transduction | 157 | 1796 | 0.0006537 | 29108 PYD and CARD domain containing                                      |
| GO signal transduction | 157 | 1796 | 0.0006537 | 2911 glutamate receptor, metabotropic 1                                   |

|                        |     |      |           |                                                                                |
|------------------------|-----|------|-----------|--------------------------------------------------------------------------------|
| GO signal transduction | 157 | 1796 | 0.0006537 | 29126 CD274 molecule                                                           |
| GO signal transduction | 157 | 1796 | 0.0006537 | 3164 nuclear receptor subfamily 4, group A, member 1                           |
| GO signal transduction | 157 | 1796 | 0.0006537 | 3355 5-hydroxytryptamine (serotonin) receptor 1F                               |
| GO signal transduction | 157 | 1796 | 0.0006537 | 338557 G protein-coupled receptor 120                                          |
| GO signal transduction | 157 | 1796 | 0.0006537 | 3479 insulin-like growth factor 1 (somatomedin C)                              |
| GO signal transduction | 157 | 1796 | 0.0006537 | 3484 insulin-like growth factor binding protein 1                              |
| GO signal transduction | 157 | 1796 | 0.0006537 | 3488 insulin-like growth factor binding protein 5                              |
| GO signal transduction | 157 | 1796 | 0.0006537 | 353345 G protein-coupled receptor 141                                          |
| GO signal transduction | 157 | 1796 | 0.0006537 | 3561 interleukin 2 receptor, gamma (severe combined immunodeficiency)          |
| GO signal transduction | 157 | 1796 | 0.0006537 | 3601 interleukin 15 receptor, alpha                                            |
| GO signal transduction | 157 | 1796 | 0.0006537 | 3709 inositol 1,4,5-triphosphate receptor, type 2                              |
| GO signal transduction | 157 | 1796 | 0.0006537 | 375790 agrin                                                                   |
| GO signal transduction | 157 | 1796 | 0.0006537 | 3815 v-kit Hardy-Zuckerman 4 feline sarcoma viral oncogene homolog             |
| GO signal transduction | 157 | 1796 | 0.0006537 | 3845 v-Ki-ras2 Kirsten rat sarcoma viral oncogene homolog                      |
| GO signal transduction | 157 | 1796 | 0.0006537 | 387496 RAS-like, family 11, member A                                           |
| GO signal transduction | 157 | 1796 | 0.0006537 | 387509 G protein-coupled receptor 153                                          |
| GO signal transduction | 157 | 1796 | 0.0006537 | 392392 olfactory receptor, family 1, subfamily K, member 1                     |
| GO signal transduction | 157 | 1796 | 0.0006537 | 395 Rho GTPase activating protein 6                                            |
| GO signal transduction | 157 | 1796 | 0.0006537 | 3959 lectin, galactoside-binding, soluble, 3 binding protein                   |
| GO signal transduction | 157 | 1796 | 0.0006537 | 4163 mutated in colorectal cancers                                             |
| GO signal transduction | 157 | 1796 | 0.0006537 | 4254 KIT ligand                                                                |
| GO signal transduction | 157 | 1796 | 0.0006537 | 4306 nuclear receptor subfamily 3, group C, member 2                           |
| GO signal transduction | 157 | 1796 | 0.0006537 | 4486 macrophage stimulating 1 receptor (c-met-related tyrosine kinase)         |
| GO signal transduction | 157 | 1796 | 0.0006537 | 4599 myxovirus (influenza virus) resistance 1, interferon-inducible protein p1 |
| GO signal transduction | 157 | 1796 | 0.0006537 | 4680 carcinoembryonic antigen-related cell adhesion molecule 6 (non-specific)  |
| GO signal transduction | 157 | 1796 | 0.0006537 | 4791 nuclear factor of kappa light polypeptide gene enhancer in B-cells 2 (p4) |
| GO signal transduction | 157 | 1796 | 0.0006537 | 4886 neuropeptide Y receptor Y1                                                |
| GO signal transduction | 157 | 1796 | 0.0006537 | 4889 neuropeptide Y receptor Y5                                                |
| GO signal transduction | 157 | 1796 | 0.0006537 | 4929 nuclear receptor subfamily 4, group A, member 2                           |
| GO signal transduction | 157 | 1796 | 0.0006537 | 5025 purinergic receptor P2X, ligand-gated ion channel, 4                      |
| GO signal transduction | 157 | 1796 | 0.0006537 | 51285 RAS-like, family 12                                                      |
| GO signal transduction | 157 | 1796 | 0.0006537 | 5129 cyclin-dependent kinase 18                                                |
| GO signal transduction | 157 | 1796 | 0.0006537 | 5136 phosphodiesterase 1A, calmodulin-dependent                                |
| GO signal transduction | 157 | 1796 | 0.0006537 | 5152 phosphodiesterase 9A                                                      |
| GO signal transduction | 157 | 1796 | 0.0006537 | 5158 phosphodiesterase 6B, cGMP-specific, rod, beta                            |
| GO signal transduction | 157 | 1796 | 0.0006537 | 51655 RAS, dexamethasone-induced 1                                             |

|                        |     |      |           |                                                                                |
|------------------------|-----|------|-----------|--------------------------------------------------------------------------------|
| GO signal transduction | 157 | 1796 | 0.0006537 | 5187 period homolog 1 (Drosophila)                                             |
| GO signal transduction | 157 | 1796 | 0.0006537 | 5295 phosphoinositide-3-kinase, regulatory subunit 1 (alpha)                   |
| GO signal transduction | 157 | 1796 | 0.0006537 | 5362 plexin A2                                                                 |
| GO signal transduction | 157 | 1796 | 0.0006537 | 5367 pro-melanin-concentrating hormone                                         |
| GO signal transduction | 157 | 1796 | 0.0006537 | 54769 DIRAS family, GTP-binding RAS-like 2                                     |
| GO signal transduction | 157 | 1796 | 0.0006537 | 54933 rhomboid, veinlet-like 2 (Drosophila)                                    |
| GO signal transduction | 157 | 1796 | 0.0006537 | 55600 intelectin 1 (galactofuranose binding)                                   |
| GO signal transduction | 157 | 1796 | 0.0006537 | 55714 odz, odd Oz/ten-m homolog 3 (Drosophila)                                 |
| GO signal transduction | 157 | 1796 | 0.0006537 | 5577 protein kinase, cAMP-dependent, regulatory, type II, beta                 |
| GO signal transduction | 157 | 1796 | 0.0006537 | 55824 phosphoprotein associated with glycosphingolipid microdomains 1          |
| GO signal transduction | 157 | 1796 | 0.0006537 | 5608 mitogen-activated protein kinase kinase 6                                 |
| GO signal transduction | 157 | 1796 | 0.0006537 | 56923 neuromedin U receptor 2                                                  |
| GO signal transduction | 157 | 1796 | 0.0006537 | 57139 ral guanine nucleotide dissociation stimulator-like 3                    |
| GO signal transduction | 157 | 1796 | 0.0006537 | 5724 platelet-activating factor receptor                                       |
| GO signal transduction | 157 | 1796 | 0.0006537 | 5732 prostaglandin E receptor 2 (subtype EP2), 53kDa                           |
| GO signal transduction | 157 | 1796 | 0.0006537 | 5734 prostaglandin E receptor 4 (subtype EP4)                                  |
| GO signal transduction | 157 | 1796 | 0.0006537 | 5737 prostaglandin F receptor (FP)                                             |
| GO signal transduction | 157 | 1796 | 0.0006537 | 57512 G protein-coupled receptor 158                                           |
| GO signal transduction | 157 | 1796 | 0.0006537 | 57524 CASK interacting protein 1                                               |
| GO signal transduction | 157 | 1796 | 0.0006537 | 57636 Rho GTPase activating protein 23                                         |
| GO signal transduction | 157 | 1796 | 0.0006537 | 5900 ral guanine nucleotide dissociation stimulator                            |
| GO signal transduction | 157 | 1796 | 0.0006537 | 60485 salvador homolog 1 (Drosophila)                                          |
| GO signal transduction | 157 | 1796 | 0.0006537 | 6238 ribosome binding protein 1 homolog 180kDa (dog)                           |
| GO signal transduction | 157 | 1796 | 0.0006537 | 6372 chemokine (C-X-C motif) ligand 6 (granulocyte chemotactic protein 2)      |
| GO signal transduction | 157 | 1796 | 0.0006537 | 6374 chemokine (C-X-C motif) ligand 5                                          |
| GO signal transduction | 157 | 1796 | 0.0006537 | 6452 SH3-domain binding protein 2                                              |
| GO signal transduction | 157 | 1796 | 0.0006537 | 6494 signal-induced proliferation-associated 1                                 |
| GO signal transduction | 157 | 1796 | 0.0006537 | 6751 somatostatin receptor 1                                                   |
| GO signal transduction | 157 | 1796 | 0.0006537 | 6778 signal transducer and activator of transcription 6, interleukin-4 inducer |
| GO signal transduction | 157 | 1796 | 0.0006537 | 7026 nuclear receptor subfamily 2, group F, member 2                           |
| GO signal transduction | 157 | 1796 | 0.0006537 | 7089 transducin-like enhancer of split 2 (E(sp1) homolog, Drosophila)          |
| GO signal transduction | 157 | 1796 | 0.0006537 | 7090 transducin-like enhancer of split 3 (E(sp1) homolog, Drosophila)          |
| GO signal transduction | 157 | 1796 | 0.0006537 | 7097 toll-like receptor 2                                                      |
| GO signal transduction | 157 | 1796 | 0.0006537 | 7098 toll-like receptor 3                                                      |
| GO signal transduction | 157 | 1796 | 0.0006537 | 7099 toll-like receptor 4                                                      |
| GO signal transduction | 157 | 1796 | 0.0006537 | 7100 toll-like receptor 5                                                      |

|                        |     |      |           |                                                                              |
|------------------------|-----|------|-----------|------------------------------------------------------------------------------|
| GO signal transduction | 157 | 1796 | 0.0006537 | 718 complement component 3                                                   |
| GO signal transduction | 157 | 1796 | 0.0006537 | 726 calpain 5                                                                |
| GO signal transduction | 157 | 1796 | 0.0006537 | 7852 chemokine (C-X-C motif) receptor 4                                      |
| GO signal transduction | 157 | 1796 | 0.0006537 | 799 calcitonin receptor                                                      |
| GO signal transduction | 157 | 1796 | 0.0006537 | 80115 BAI1-associated protein 2-like 2                                       |
| GO signal transduction | 157 | 1796 | 0.0006537 | 81285 olfactory receptor, family 51, subfamily E, member 2                   |
| GO signal transduction | 157 | 1796 | 0.0006537 | 81470 olfactory receptor, family 2, subfamily G, member 2                    |
| GO signal transduction | 157 | 1796 | 0.0006537 | 819 calcium modulating ligand                                                |
| GO signal transduction | 157 | 1796 | 0.0006537 | 8313 axin 2                                                                  |
| GO signal transduction | 157 | 1796 | 0.0006537 | 834 caspase 1, apoptosis-related cysteine peptidase (interleukin 1, beta, co |
| GO signal transduction | 157 | 1796 | 0.0006537 | 83593 Ras association (RalGDS/AF-6) domain family member 5                   |
| GO signal transduction | 157 | 1796 | 0.0006537 | 83937 Ras association (RalGDS/AF-6) domain family member 4                   |
| GO signal transduction | 157 | 1796 | 0.0006537 | 84059 G protein-coupled receptor 98                                          |
| GO signal transduction | 157 | 1796 | 0.0006537 | 85004 RAS-like, estrogen-regulated, growth inhibitor                         |
| GO signal transduction | 157 | 1796 | 0.0006537 | 8527 diacylglycerol kinase, delta 130kDa                                     |
| GO signal transduction | 157 | 1796 | 0.0006537 | 8622 phosphodiesterase 8B                                                    |
| GO signal transduction | 157 | 1796 | 0.0006537 | 8660 insulin receptor substrate 2                                            |
| GO signal transduction | 157 | 1796 | 0.0006537 | 8740 tumor necrosis factor (ligand) superfamily, member 14                   |
| GO signal transduction | 157 | 1796 | 0.0006537 | 8744 tumor necrosis factor (ligand) superfamily, member 9                    |
| GO signal transduction | 157 | 1796 | 0.0006537 | 8793 tumor necrosis factor receptor superfamily, member 10d, decoy with t    |
| GO signal transduction | 157 | 1796 | 0.0006537 | 8794 tumor necrosis factor receptor superfamily, member 10c, decoy witho     |
| GO signal transduction | 157 | 1796 | 0.0006537 | 8839 WNT1 inducible signaling pathway protein 2                              |
| GO signal transduction | 157 | 1796 | 0.0006537 | 885 cholecystokinin                                                          |
| GO signal transduction | 157 | 1796 | 0.0006537 | 8863 period homolog 3 (Drosophila)                                           |
| GO signal transduction | 157 | 1796 | 0.0006537 | 8864 period homolog 2 (Drosophila)                                           |
| GO signal transduction | 157 | 1796 | 0.0006537 | 8911 calcium channel, voltage-dependent, T type, alpha 1I subunit            |
| GO signal transduction | 157 | 1796 | 0.0006537 | 8973 cholinergic receptor, nicotinic, alpha 6                                |
| GO signal transduction | 157 | 1796 | 0.0006537 | 9064 mitogen-activated protein kinase kinase kinase 6                        |
| GO signal transduction | 157 | 1796 | 0.0006537 | 91 activin A receptor, type IB                                               |
| GO signal transduction | 157 | 1796 | 0.0006537 | 9182 Ras association (RalGDS/AF-6) domain family (N-terminal) member 9       |
| GO signal transduction | 157 | 1796 | 0.0006537 | 94 activin A receptor type II-like 1                                         |
| GO signal transduction | 157 | 1796 | 0.0006537 | 9518 growth differentiation factor 15                                        |
| GO signal transduction | 157 | 1796 | 0.0006537 | 952 CD38 molecule                                                            |
| GO signal transduction | 157 | 1796 | 0.0006537 | 9567 GTP binding protein 1                                                   |
| GO signal transduction | 157 | 1796 | 0.0006537 | 9788 metastasis suppressor 1                                                 |
| GO signal transduction | 157 | 1796 | 0.0006537 | 9966 tumor necrosis factor (ligand) superfamily, member 15                   |

|                            |     |      |           |                                                                                             |
|----------------------------|-----|------|-----------|---------------------------------------------------------------------------------------------|
| GO signal transduction     | 157 | 1796 | 0.0006537 | 9971 nuclear receptor subfamily 1, group H, member 4                                        |
| GO regulation of apoptosis | 18  | 114  | 0.0007103 | 10116 fem-1 homolog b (C. elegans)                                                          |
| GO regulation of apoptosis | 18  | 114  | 0.0007103 | 130399 activin A receptor, type IC                                                          |
| GO regulation of apoptosis | 18  | 114  | 0.0007103 | 1508 cathepsin B                                                                            |
| GO regulation of apoptosis | 18  | 114  | 0.0007103 | 2737 GLI family zinc finger 3                                                               |
| GO regulation of apoptosis | 18  | 114  | 0.0007103 | 29108 PYD and CARD domain containing                                                        |
| GO regulation of apoptosis | 18  | 114  | 0.0007103 | 3569 interleukin 6 (interferon, beta 2)                                                     |
| GO regulation of apoptosis | 18  | 114  | 0.0007103 | 3570 interleukin 6 receptor                                                                 |
| GO regulation of apoptosis | 18  | 114  | 0.0007103 | 4170 myeloid cell leukemia sequence 1 (BCL2-related)                                        |
| GO regulation of apoptosis | 18  | 114  | 0.0007103 | 5025 purinergic receptor P2X, ligand-gated ion channel, 4                                   |
| GO regulation of apoptosis | 18  | 114  | 0.0007103 | 57118 calcium/calmodulin-dependent protein kinase ID                                        |
| GO regulation of apoptosis | 18  | 114  | 0.0007103 | 64127 nucleotide-binding oligomerization domain containing 2                                |
| GO regulation of apoptosis | 18  | 114  | 0.0007103 | 64135 interferon induced with helicase C domain 1                                           |
| GO regulation of apoptosis | 18  | 114  | 0.0007103 | 64798 DEP domain containing 6                                                               |
| GO regulation of apoptosis | 18  | 114  | 0.0007103 | 7001 peroxiredoxin 2                                                                        |
| GO regulation of apoptosis | 18  | 114  | 0.0007103 | 79092 caspase recruitment domain family, member 14                                          |
| GO regulation of apoptosis | 18  | 114  | 0.0007103 | 837 caspase 4, apoptosis-related cysteine peptidase                                         |
| GO regulation of apoptosis | 18  | 114  | 0.0007103 | 84674 caspase recruitment domain family, member 6                                           |
| GO regulation of apoptosis | 18  | 114  | 0.0007103 | 8996 nucleolar protein 3 (apoptosis repressor with CARD domain)                             |
| GO ion transport           | 54  | 505  | 0.0007212 | 10008 potassium voltage-gated channel, Isk-related family, member 3                         |
| GO ion transport           | 54  | 505  | 0.0007212 | 10312 T-cell, immune regulator 1, ATPase, H <sup>+</sup> transporting, lysosomal V0 subunit |
| GO ion transport           | 54  | 505  | 0.0007212 | 10568 solute carrier family 34 (sodium phosphate), member 2                                 |
| GO ion transport           | 54  | 505  | 0.0007212 | 1080 cystic fibrosis transmembrane conductance regulator (ATP-binding cassette)             |
| GO ion transport           | 54  | 505  | 0.0007212 | 1139 cholinergic receptor, nicotinic, alpha 7                                               |
| GO ion transport           | 54  | 505  | 0.0007212 | 1193 chloride intracellular channel 2                                                       |
| GO ion transport           | 54  | 505  | 0.0007212 | 157855 potassium channel, subfamily U, member 1                                             |
| GO ion transport           | 54  | 505  | 0.0007212 | 2564 gamma-aminobutyric acid (GABA) A receptor, epsilon                                     |
| GO ion transport           | 54  | 505  | 0.0007212 | 259232 sodium leak channel, non-selective                                                   |
| GO ion transport           | 54  | 505  | 0.0007212 | 26507 cyclin M1                                                                             |
| GO ion transport           | 54  | 505  | 0.0007212 | 266675 bestrophin 4                                                                         |
| GO ion transport           | 54  | 505  | 0.0007212 | 27035 NADPH oxidase 1                                                                       |
| GO ion transport           | 54  | 505  | 0.0007212 | 27345 potassium large conductance calcium-activated channel, subfamily M, member 1          |
| GO ion transport           | 54  | 505  | 0.0007212 | 28231 solute carrier organic anion transporter family, member 4A1                           |
| GO ion transport           | 54  | 505  | 0.0007212 | 286133 scavenger receptor class A, member 5 (putative)                                      |
| GO ion transport           | 54  | 505  | 0.0007212 | 343450 potassium channel, subfamily T, member 2                                             |
| GO ion transport           | 54  | 505  | 0.0007212 | 3709 inositol 1,4,5-triphosphate receptor, type 2                                           |

|                  |    |     |           |                                                                                      |
|------------------|----|-----|-----------|--------------------------------------------------------------------------------------|
| GO ion transport | 54 | 505 | 0.0007212 | 3759 potassium inwardly-rectifying channel, subfamily J, member 2                    |
| GO ion transport | 54 | 505 | 0.0007212 | 3773 potassium inwardly-rectifying channel, subfamily J, member 16                   |
| GO ion transport | 54 | 505 | 0.0007212 | 3775 potassium channel, subfamily K, member 1                                        |
| GO ion transport | 54 | 505 | 0.0007212 | 3782 potassium intermediate/small conductance calcium-activated channel,             |
| GO ion transport | 54 | 505 | 0.0007212 | 3783 potassium intermediate/small conductance calcium-activated channel,             |
| GO ion transport | 54 | 505 | 0.0007212 | 3786 potassium voltage-gated channel, KQT-like subfamily, member 3                   |
| GO ion transport | 54 | 505 | 0.0007212 | 3790 potassium voltage-gated channel, delayed-rectifier, subfamily S, memb           |
| GO ion transport | 54 | 505 | 0.0007212 | 498 ATP synthase, H <sup>+</sup> transporting, mitochondrial F1 complex, alpha subun |
| GO ion transport | 54 | 505 | 0.0007212 | 5025 purinergic receptor P2X, ligand-gated ion channel, 4                            |
| GO ion transport | 54 | 505 | 0.0007212 | 50617 ATPase, H <sup>+</sup> transporting, lysosomal V0 subunit a4                   |
| GO ion transport | 54 | 505 | 0.0007212 | 53373 two pore segment channel 1                                                     |
| GO ion transport | 54 | 505 | 0.0007212 | 53405 chloride intracellular channel 5                                               |
| GO ion transport | 54 | 505 | 0.0007212 | 5349 FXYP domain containing ion transport regulator 3                                |
| GO ion transport | 54 | 505 | 0.0007212 | 53827 FXYP domain containing ion transport regulator 5                               |
| GO ion transport | 54 | 505 | 0.0007212 | 55799 calcium channel, voltage-dependent, alpha 2/delta subunit 3                    |
| GO ion transport | 54 | 505 | 0.0007212 | 55867 solute carrier family 22 (organic anion/urate transporter), member 11          |
| GO ion transport | 54 | 505 | 0.0007212 | 57620 stromal interaction molecule 2                                                 |
| GO ion transport | 54 | 505 | 0.0007212 | 63027 solute carrier family 22, member 23                                            |
| GO ion transport | 54 | 505 | 0.0007212 | 6330 sodium channel, voltage-gated, type IV, beta                                    |
| GO ion transport | 54 | 505 | 0.0007212 | 63982 anoctamin 3                                                                    |
| GO ion transport | 54 | 505 | 0.0007212 | 64116 solute carrier family 39 (zinc transporter), member 8                          |
| GO ion transport | 54 | 505 | 0.0007212 | 6535 solute carrier family 6 (neurotransmitter transporter, creatine), memb          |
| GO ion transport | 54 | 505 | 0.0007212 | 6947 transcobalamin I (vitamin B12 binding protein, R binder family)                 |
| GO ion transport | 54 | 505 | 0.0007212 | 6948 transcobalamin II; macrocytic anemia                                            |
| GO ion transport | 54 | 505 | 0.0007212 | 7223 transient receptor potential cation channel, subfamily C, member 4              |
| GO ion transport | 54 | 505 | 0.0007212 | 774 calcium channel, voltage-dependent, N type, alpha 1B subunit                     |
| GO ion transport | 54 | 505 | 0.0007212 | 783 calcium channel, voltage-dependent, beta 2 subunit                               |
| GO ion transport | 54 | 505 | 0.0007212 | 79689 STEAP family member 4                                                          |
| GO ion transport | 54 | 505 | 0.0007212 | 84561 solute carrier family 12 (potassium/chloride transporters), member 8           |
| GO ion transport | 54 | 505 | 0.0007212 | 8514 potassium voltage-gated channel, shaker-related subfamily, beta mem             |
| GO ion transport | 54 | 505 | 0.0007212 | 8645 potassium channel, subfamily K, member 5                                        |
| GO ion transport | 54 | 505 | 0.0007212 | 8911 calcium channel, voltage-dependent, T type, alpha 1I subunit                    |
| GO ion transport | 54 | 505 | 0.0007212 | 8912 calcium channel, voltage-dependent, T type, alpha 1H subunit                    |
| GO ion transport | 54 | 505 | 0.0007212 | 8973 cholinergic receptor, nicotinic, alpha 6                                        |
| GO ion transport | 54 | 505 | 0.0007212 | 8992 ATPase, H <sup>+</sup> transporting, lysosomal 9kDa, V0 subunit e1              |
| GO ion transport | 54 | 505 | 0.0007212 | 93589 calcium channel, voltage-dependent, alpha 2/delta subunit 4                    |

|                                           |     |      |           |                                                                             |
|-------------------------------------------|-----|------|-----------|-----------------------------------------------------------------------------|
| GO ion transport                          | 54  | 505  | 0.0007212 | 9962 solute carrier family 23 (nucleobase transporters), member 2           |
| GO positive regulation of tumor necrosis  | 5   | 12   | 0.0007808 | 64127 nucleotide-binding oligomerization domain containing 2                |
| GO positive regulation of tumor necrosis  | 5   | 12   | 0.0007808 | 7097 toll-like receptor 2                                                   |
| GO positive regulation of tumor necrosis  | 5   | 12   | 0.0007808 | 7098 toll-like receptor 3                                                   |
| GO positive regulation of tumor necrosis  | 5   | 12   | 0.0007808 | 7099 toll-like receptor 4                                                   |
| GO positive regulation of tumor necrosis  | 5   | 12   | 0.0007808 | 929 CD14 molecule                                                           |
| GO lipoprotein metabolic process          | 6   | 18   | 0.000915  | 23780 apolipoprotein L, 2                                                   |
| GO lipoprotein metabolic process          | 6   | 18   | 0.000915  | 255738 proprotein convertase subtilisin/kexin type 9                        |
| GO lipoprotein metabolic process          | 6   | 18   | 0.000915  | 5465 peroxisome proliferator-activated receptor alpha                       |
| GO lipoprotein metabolic process          | 6   | 18   | 0.000915  | 80830 apolipoprotein L, 6                                                   |
| GO lipoprotein metabolic process          | 6   | 18   | 0.000915  | 80833 apolipoprotein L, 3                                                   |
| GO lipoprotein metabolic process          | 6   | 18   | 0.000915  | 8542 apolipoprotein L, 1                                                    |
| GO regulation of Rho protein signal trans | 13  | 71   | 0.0009389 | 152273 FYVE, RhoGEF and PH domain containing 5                              |
| GO regulation of Rho protein signal trans | 13  | 71   | 0.0009389 | 221178 spermatogenesis associated 13                                        |
| GO regulation of Rho protein signal trans | 13  | 71   | 0.0009389 | 23263 MCF.2 cell line derived transforming sequence-like                    |
| GO regulation of Rho protein signal trans | 13  | 71   | 0.0009389 | 23365 Rho guanine nucleotide exchange factor (GEF) 12                       |
| GO regulation of Rho protein signal trans | 13  | 71   | 0.0009389 | 26030 pleckstrin homology domain containing, family G (with RhoGef domain   |
| GO regulation of Rho protein signal trans | 13  | 71   | 0.0009389 | 389337 Rho guanine nucleotide exchange factor (GEF) 37                      |
| GO regulation of Rho protein signal trans | 13  | 71   | 0.0009389 | 440107 pleckstrin homology domain containing, family G (with RhoGef domain  |
| GO regulation of Rho protein signal trans | 13  | 71   | 0.0009389 | 54848 Rho guanine nucleotide exchange factor (GEF) 38                       |
| GO regulation of Rho protein signal trans | 13  | 71   | 0.0009389 | 55160 Rho guanine nucleotide exchange factor (GEF) 10-like                  |
| GO regulation of Rho protein signal trans | 13  | 71   | 0.0009389 | 55200 pleckstrin homology domain containing, family G (with RhoGef domain   |
| GO regulation of Rho protein signal trans | 13  | 71   | 0.0009389 | 7984 Rho guanine nucleotide exchange factor (GEF) 5                         |
| GO regulation of Rho protein signal trans | 13  | 71   | 0.0009389 | 84033 obscurin, cytoskeletal calmodulin and titin-interacting RhoGEF        |
| GO regulation of Rho protein signal trans | 13  | 71   | 0.0009389 | 9459 Rac/Cdc42 guanine nucleotide exchange factor (GEF) 6                   |
| GO plasma membrane                        | 228 | 2763 | 0.0010189 | 1004 cadherin 6, type 2, K-cadherin (fetal kidney)                          |
| GO plasma membrane                        | 228 | 2763 | 0.0010189 | 10076 protein tyrosine phosphatase, receptor type, U                        |
| GO plasma membrane                        | 228 | 2763 | 0.0010189 | 1009 cadherin 11, type 2, OB-cadherin (osteoblast)                          |
| GO plasma membrane                        | 228 | 2763 | 0.0010189 | 1014 cadherin 16, KSP-cadherin                                              |
| GO plasma membrane                        | 228 | 2763 | 0.0010189 | 10156 RAS p21 protein activator 4                                           |
| GO plasma membrane                        | 228 | 2763 | 0.0010189 | 1016 cadherin 18, type 2                                                    |
| GO plasma membrane                        | 228 | 2763 | 0.0010189 | 10252 sprouty homolog 1, antagonist of FGF signaling (Drosophila)           |
| GO plasma membrane                        | 228 | 2763 | 0.0010189 | 10253 sprouty homolog 2 (Drosophila)                                        |
| GO plasma membrane                        | 228 | 2763 | 0.0010189 | 10268 receptor (G protein-coupled) activity modifying protein 3             |
| GO plasma membrane                        | 228 | 2763 | 0.0010189 | 10288 leukocyte immunoglobulin-like receptor, subfamily B (with TM and ITIM |
| GO plasma membrane                        | 228 | 2763 | 0.0010189 | 10312 T-cell, immune regulator 1, ATPase, H+ transporting, lysosomal V0 sub |



|                    |     |      |           |                                                                               |
|--------------------|-----|------|-----------|-------------------------------------------------------------------------------|
| GO plasma membrane | 228 | 2763 | 0.0010189 | 10397 N-myc downstream regulated 1                                            |
| GO plasma membrane | 228 | 2763 | 0.0010189 | 10410 interferon induced transmembrane protein 3 (1-8U)                       |
| GO plasma membrane | 228 | 2763 | 0.0010189 | 10435 CDC42 effector protein (Rho GTPase binding) 2                           |
| GO plasma membrane | 228 | 2763 | 0.0010189 | 1048 carcinoembryonic antigen-related cell adhesion molecule 5                |
| GO plasma membrane | 228 | 2763 | 0.0010189 | 10507 sema domain, immunoglobulin domain (Ig), transmembrane domain (T        |
| GO plasma membrane | 228 | 2763 | 0.0010189 | 10752 cell adhesion molecule with homology to L1CAM (close homolog of L1)     |
| GO plasma membrane | 228 | 2763 | 0.0010189 | 10811 NADPH oxidase activator 1                                               |
| GO plasma membrane | 228 | 2763 | 0.0010189 | 1087 carcinoembryonic antigen-related cell adhesion molecule 7                |
| GO plasma membrane | 228 | 2763 | 0.0010189 | 10942 protease, serine, 21 (testisin)                                         |
| GO plasma membrane | 228 | 2763 | 0.0010189 | 11156 protein tyrosine phosphatase type IVA, member 3                         |
| GO plasma membrane | 228 | 2763 | 0.0010189 | 112 adenylate cyclase 6                                                       |
| GO plasma membrane | 228 | 2763 | 0.0010189 | 113235 solute carrier family 46 (folate transporter), member 1                |
| GO plasma membrane | 228 | 2763 | 0.0010189 | 1139 cholinergic receptor, nicotinic, alpha 7                                 |
| GO plasma membrane | 228 | 2763 | 0.0010189 | 114569 mal, T-cell differentiation protein 2                                  |
| GO plasma membrane | 228 | 2763 | 0.0010189 | 115330 G protein-coupled receptor 146                                         |
| GO plasma membrane | 228 | 2763 | 0.0010189 | 118429 anthrax toxin receptor 2                                               |
| GO plasma membrane | 228 | 2763 | 0.0010189 | 121130 olfactory receptor, family 10, subfamily P, member 1                   |
| GO plasma membrane | 228 | 2763 | 0.0010189 | 123 perilipin 2                                                               |
| GO plasma membrane | 228 | 2763 | 0.0010189 | 130576 LY6/PLAUR domain containing 6B                                         |
| GO plasma membrane | 228 | 2763 | 0.0010189 | 1363 carboxypeptidase E                                                       |
| GO plasma membrane | 228 | 2763 | 0.0010189 | 1364 claudin 4                                                                |
| GO plasma membrane | 228 | 2763 | 0.0010189 | 1368 carboxypeptidase M                                                       |
| GO plasma membrane | 228 | 2763 | 0.0010189 | 1380 complement component (3d/Epstein Barr virus) receptor 2                  |
| GO plasma membrane | 228 | 2763 | 0.0010189 | 1435 colony stimulating factor 1 (macrophage)                                 |
| GO plasma membrane | 228 | 2763 | 0.0010189 | 143503 olfactory receptor, family 51, subfamily E, member 1                   |
| GO plasma membrane | 228 | 2763 | 0.0010189 | 148170 CDC42 effector protein (Rho GTPase binding) 5                          |
| GO plasma membrane | 228 | 2763 | 0.0010189 | 151473 solute carrier family 16, member 14 (monocarboxylic acid transporter : |
| GO plasma membrane | 228 | 2763 | 0.0010189 | 154 adrenergic, beta-2-, receptor, surface                                    |
| GO plasma membrane | 228 | 2763 | 0.0010189 | 157638 family with sequence similarity 84, member B                           |
| GO plasma membrane | 228 | 2763 | 0.0010189 | 1604 CD55 molecule, decay accelerating factor for complement (Cromer blo      |
| GO plasma membrane | 228 | 2763 | 0.0010189 | 166929 sphingomyelin synthase 2                                               |
| GO plasma membrane | 228 | 2763 | 0.0010189 | 1741 discs, large homolog 3 (Drosophila)                                      |
| GO plasma membrane | 228 | 2763 | 0.0010189 | 1785 dynamin 2                                                                |
| GO plasma membrane | 228 | 2763 | 0.0010189 | 1803 dipeptidyl-peptidase 4                                                   |
| GO plasma membrane | 228 | 2763 | 0.0010189 | 1813 dopamine receptor D2                                                     |
| GO plasma membrane | 228 | 2763 | 0.0010189 | 1815 dopamine receptor D4                                                     |

|                    |     |      |           |                                                                           |
|--------------------|-----|------|-----------|---------------------------------------------------------------------------|
| GO plasma membrane | 228 | 2763 | 0.0010189 | 1821 dystrophin related protein 2                                         |
| GO plasma membrane | 228 | 2763 | 0.0010189 | 1839 heparin-binding EGF-like growth factor                               |
| GO plasma membrane | 228 | 2763 | 0.0010189 | 1901 sphingosine-1-phosphate receptor 1                                   |
| GO plasma membrane | 228 | 2763 | 0.0010189 | 1902 lysophosphatidic acid receptor 1                                     |
| GO plasma membrane | 228 | 2763 | 0.0010189 | 1948 ephrin-B2                                                            |
| GO plasma membrane | 228 | 2763 | 0.0010189 | 1969 EPH receptor A2                                                      |
| GO plasma membrane | 228 | 2763 | 0.0010189 | 2015 egf-like module containing, mucin-like, hormone receptor-like 1      |
| GO plasma membrane | 228 | 2763 | 0.0010189 | 2026 enolase 2 (gamma, neuronal)                                          |
| GO plasma membrane | 228 | 2763 | 0.0010189 | 2040 stomatin                                                             |
| GO plasma membrane | 228 | 2763 | 0.0010189 | 2066 v-erb-a erythroblastic leukemia viral oncogene homolog 4 (avian)     |
| GO plasma membrane | 228 | 2763 | 0.0010189 | 2153 coagulation factor V (proaccelerin, labile factor)                   |
| GO plasma membrane | 228 | 2763 | 0.0010189 | 2205 Fc fragment of IgE, high affinity I, receptor for; alpha polypeptide |
| GO plasma membrane | 228 | 2763 | 0.0010189 | 222545 G protein-coupled receptor, family C, group 6, member A            |
| GO plasma membrane | 228 | 2763 | 0.0010189 | 2239 glypican 4                                                           |
| GO plasma membrane | 228 | 2763 | 0.0010189 | 2262 glypican 5                                                           |
| GO plasma membrane | 228 | 2763 | 0.0010189 | 2263 fibroblast growth factor receptor 2                                  |
| GO plasma membrane | 228 | 2763 | 0.0010189 | 22859 latrophilin 1                                                       |
| GO plasma membrane | 228 | 2763 | 0.0010189 | 22925 phospholipase A2 receptor 1, 180kDa                                 |
| GO plasma membrane | 228 | 2763 | 0.0010189 | 23048 formin binding protein 1                                            |
| GO plasma membrane | 228 | 2763 | 0.0010189 | 23180 raftlin, lipid raft linker 1                                        |
| GO plasma membrane | 228 | 2763 | 0.0010189 | 23263 MCF.2 cell line derived transforming sequence-like                  |
| GO plasma membrane | 228 | 2763 | 0.0010189 | 23266 latrophilin 2                                                       |
| GO plasma membrane | 228 | 2763 | 0.0010189 | 23284 latrophilin 3                                                       |
| GO plasma membrane | 228 | 2763 | 0.0010189 | 23371 tensin like C1 domain containing phosphatase (tensin 2)             |
| GO plasma membrane | 228 | 2763 | 0.0010189 | 23418 crumbs homolog 1 (Drosophila)                                       |
| GO plasma membrane | 228 | 2763 | 0.0010189 | 23682 RAB38, member RAS oncogene family                                   |
| GO plasma membrane | 228 | 2763 | 0.0010189 | 2564 gamma-aminobutyric acid (GABA) A receptor, epsilon                   |
| GO plasma membrane | 228 | 2763 | 0.0010189 | 25837 RAB26, member RAS oncogene family                                   |
| GO plasma membrane | 228 | 2763 | 0.0010189 | 2633 guanylate binding protein 1, interferon-inducible, 67kDa             |
| GO plasma membrane | 228 | 2763 | 0.0010189 | 2634 guanylate binding protein 2, interferon-inducible                    |
| GO plasma membrane | 228 | 2763 | 0.0010189 | 2642 glucagon receptor                                                    |
| GO plasma membrane | 228 | 2763 | 0.0010189 | 26507 cyclin M1                                                           |
| GO plasma membrane | 228 | 2763 | 0.0010189 | 266675 bestrophin 4                                                       |
| GO plasma membrane | 228 | 2763 | 0.0010189 | 2706 gap junction protein, beta 2, 26kDa                                  |
| GO plasma membrane | 228 | 2763 | 0.0010189 | 2707 gap junction protein, beta 3, 31kDa                                  |
| GO plasma membrane | 228 | 2763 | 0.0010189 | 27076 LY6/PLAUR domain containing 3                                       |

|                    |     |      |           |                                                                            |
|--------------------|-----|------|-----------|----------------------------------------------------------------------------|
| GO plasma membrane | 228 | 2763 | 0.0010189 | 27134 tight junction protein 3 (zona occludens 3)                          |
| GO plasma membrane | 228 | 2763 | 0.0010189 | 27202 G protein-coupled receptor 77                                        |
| GO plasma membrane | 228 | 2763 | 0.0010189 | 2769 guanine nucleotide binding protein (G protein), alpha 15 (Gq class)   |
| GO plasma membrane | 228 | 2763 | 0.0010189 | 283316 CD163 molecule-like 1                                               |
| GO plasma membrane | 228 | 2763 | 0.0010189 | 283383 G protein-coupled receptor 133                                      |
| GO plasma membrane | 228 | 2763 | 0.0010189 | 285704 RGM domain family, member B                                         |
| GO plasma membrane | 228 | 2763 | 0.0010189 | 2861 G protein-coupled receptor 37 (endothelin receptor type B-like)       |
| GO plasma membrane | 228 | 2763 | 0.0010189 | 286133 scavenger receptor class A, member 5 (putative)                     |
| GO plasma membrane | 228 | 2763 | 0.0010189 | 286183 Na <sup>+</sup> /K <sup>+</sup> transporting ATPase interacting 3   |
| GO plasma membrane | 228 | 2763 | 0.0010189 | 2865 free fatty acid receptor 3                                            |
| GO plasma membrane | 228 | 2763 | 0.0010189 | 2867 free fatty acid receptor 2                                            |
| GO plasma membrane | 228 | 2763 | 0.0010189 | 28982 feline leukemia virus subgroup C cellular receptor 1                 |
| GO plasma membrane | 228 | 2763 | 0.0010189 | 2911 glutamate receptor, metabotropic 1                                    |
| GO plasma membrane | 228 | 2763 | 0.0010189 | 29126 CD274 molecule                                                       |
| GO plasma membrane | 228 | 2763 | 0.0010189 | 29760 B-cell linker                                                        |
| GO plasma membrane | 228 | 2763 | 0.0010189 | 3355 5-hydroxytryptamine (serotonin) receptor 1F                           |
| GO plasma membrane | 228 | 2763 | 0.0010189 | 338557 G protein-coupled receptor 120                                      |
| GO plasma membrane | 228 | 2763 | 0.0010189 | 342035 gliomedin                                                           |
| GO plasma membrane | 228 | 2763 | 0.0010189 | 343450 potassium channel, subfamily T, member 2                            |
| GO plasma membrane | 228 | 2763 | 0.0010189 | 353345 G protein-coupled receptor 141                                      |
| GO plasma membrane | 228 | 2763 | 0.0010189 | 3570 interleukin 6 receptor                                                |
| GO plasma membrane | 228 | 2763 | 0.0010189 | 358 aquaporin 1 (Colton blood group)                                       |
| GO plasma membrane | 228 | 2763 | 0.0010189 | 3587 interleukin 10 receptor, alpha                                        |
| GO plasma membrane | 228 | 2763 | 0.0010189 | 3643 insulin receptor                                                      |
| GO plasma membrane | 228 | 2763 | 0.0010189 | 3678 integrin, alpha 5 (fibronectin receptor, alpha polypeptide)           |
| GO plasma membrane | 228 | 2763 | 0.0010189 | 368 ATP-binding cassette, sub-family C (CFTR/MRP), member 6                |
| GO plasma membrane | 228 | 2763 | 0.0010189 | 3689 integrin, beta 2 (complement component 3 receptor 3 and 4 subunit)    |
| GO plasma membrane | 228 | 2763 | 0.0010189 | 3691 integrin, beta 4                                                      |
| GO plasma membrane | 228 | 2763 | 0.0010189 | 3732 CD82 molecule                                                         |
| GO plasma membrane | 228 | 2763 | 0.0010189 | 3782 potassium intermediate/small conductance calcium-activated channel,   |
| GO plasma membrane | 228 | 2763 | 0.0010189 | 3790 potassium voltage-gated channel, delayed-rectifier, subfamily S, memb |
| GO plasma membrane | 228 | 2763 | 0.0010189 | 3845 v-Ki-ras2 Kirsten rat sarcoma viral oncogene homolog                  |
| GO plasma membrane | 228 | 2763 | 0.0010189 | 387509 G protein-coupled receptor 153                                      |
| GO plasma membrane | 228 | 2763 | 0.0010189 | 392392 olfactory receptor, family 1, subfamily K, member 1                 |
| GO plasma membrane | 228 | 2763 | 0.0010189 | 3949 low density lipoprotein receptor                                      |
| GO plasma membrane | 228 | 2763 | 0.0010189 | 3958 lectin, galactoside-binding, soluble, 3                               |

|                    |     |      |           |                                                                                      |
|--------------------|-----|------|-----------|--------------------------------------------------------------------------------------|
| GO plasma membrane | 228 | 2763 | 0.0010189 | 399694 SHC (Src homology 2 domain containing) family, member 4                       |
| GO plasma membrane | 228 | 2763 | 0.0010189 | 402415 XK, Kell blood group complex subunit-related, X-linked                        |
| GO plasma membrane | 228 | 2763 | 0.0010189 | 412 steroid sulfatase (microsomal), isozyme S                                        |
| GO plasma membrane | 228 | 2763 | 0.0010189 | 4163 mutated in colorectal cancers                                                   |
| GO plasma membrane | 228 | 2763 | 0.0010189 | 4179 CD46 molecule, complement regulatory protein                                    |
| GO plasma membrane | 228 | 2763 | 0.0010189 | 4254 KIT ligand                                                                      |
| GO plasma membrane | 228 | 2763 | 0.0010189 | 4359 myelin protein zero                                                             |
| GO plasma membrane | 228 | 2763 | 0.0010189 | 4486 macrophage stimulating 1 receptor (c-met-related tyrosine kinase)               |
| GO plasma membrane | 228 | 2763 | 0.0010189 | 4582 mucin 1, cell surface associated                                                |
| GO plasma membrane | 228 | 2763 | 0.0010189 | 4680 carcinoembryonic antigen-related cell adhesion molecule 6 (non-specif           |
| GO plasma membrane | 228 | 2763 | 0.0010189 | 4684 neural cell adhesion molecule 1                                                 |
| GO plasma membrane | 228 | 2763 | 0.0010189 | 4851 Notch homolog 1, translocation-associated (Drosophila)                          |
| GO plasma membrane | 228 | 2763 | 0.0010189 | 4853 Notch homolog 2 (Drosophila)                                                    |
| GO plasma membrane | 228 | 2763 | 0.0010189 | 4886 neuropeptide Y receptor Y1                                                      |
| GO plasma membrane | 228 | 2763 | 0.0010189 | 4889 neuropeptide Y receptor Y5                                                      |
| GO plasma membrane | 228 | 2763 | 0.0010189 | 493 ATPase, Ca <sup>++</sup> transporting, plasma membrane 4                         |
| GO plasma membrane | 228 | 2763 | 0.0010189 | 498 ATP synthase, H <sup>+</sup> transporting, mitochondrial F1 complex, alpha subun |
| GO plasma membrane | 228 | 2763 | 0.0010189 | 5025 purinergic receptor P2X, ligand-gated ion channel, 4                            |
| GO plasma membrane | 228 | 2763 | 0.0010189 | 50617 ATPase, H <sup>+</sup> transporting, lysosomal V0 subunit a4                   |
| GO plasma membrane | 228 | 2763 | 0.0010189 | 5099 protocadherin 7                                                                 |
| GO plasma membrane | 228 | 2763 | 0.0010189 | 51299 neuritin 1                                                                     |
| GO plasma membrane | 228 | 2763 | 0.0010189 | 5152 phosphodiesterase 9A                                                            |
| GO plasma membrane | 228 | 2763 | 0.0010189 | 51655 RAS, dexamethasone-induced 1                                                   |
| GO plasma membrane | 228 | 2763 | 0.0010189 | 51754 transmembrane protein 8B                                                       |
| GO plasma membrane | 228 | 2763 | 0.0010189 | 5218 cyclin-dependent kinase 14                                                      |
| GO plasma membrane | 228 | 2763 | 0.0010189 | 5244 ATP-binding cassette, sub-family B (MDR/TAP), member 4                          |
| GO plasma membrane | 228 | 2763 | 0.0010189 | 5284 polymeric immunoglobulin receptor                                               |
| GO plasma membrane | 228 | 2763 | 0.0010189 | 5318 plakophilin 2                                                                   |
| GO plasma membrane | 228 | 2763 | 0.0010189 | 5362 plexin A2                                                                       |
| GO plasma membrane | 228 | 2763 | 0.0010189 | 54769 DIRAS family, GTP-binding RAS-like 2                                           |
| GO plasma membrane | 228 | 2763 | 0.0010189 | 55068 ecto-NOX disulfide-thiol exchanger 1                                           |
| GO plasma membrane | 228 | 2763 | 0.0010189 | 55080 TAP binding protein-like                                                       |
| GO plasma membrane | 228 | 2763 | 0.0010189 | 55600 intelectin 1 (galactofuranose binding)                                         |
| GO plasma membrane | 228 | 2763 | 0.0010189 | 55824 phosphoprotein associated with glycosphingolipid microdomains 1                |
| GO plasma membrane | 228 | 2763 | 0.0010189 | 55867 solute carrier family 22 (organic anion/urate transporter), member 11          |
| GO plasma membrane | 228 | 2763 | 0.0010189 | 56288 par-3 partitioning defective 3 homolog (C. elegans)                            |

|                    |     |      |           |                                                                               |
|--------------------|-----|------|-----------|-------------------------------------------------------------------------------|
| GO plasma membrane | 228 | 2763 | 0.0010189 | 56923 neuromedin U receptor 2                                                 |
| GO plasma membrane | 228 | 2763 | 0.0010189 | 57104 patatin-like phospholipase domain containing 2                          |
| GO plasma membrane | 228 | 2763 | 0.0010189 | 5724 platelet-activating factor receptor                                      |
| GO plasma membrane | 228 | 2763 | 0.0010189 | 5732 prostaglandin E receptor 2 (subtype EP2), 53kDa                          |
| GO plasma membrane | 228 | 2763 | 0.0010189 | 5734 prostaglandin E receptor 4 (subtype EP4)                                 |
| GO plasma membrane | 228 | 2763 | 0.0010189 | 5737 prostaglandin F receptor (FP)                                            |
| GO plasma membrane | 228 | 2763 | 0.0010189 | 5742 prostaglandin-endoperoxide synthase 1 (prostaglandin G/H synthase and    |
| GO plasma membrane | 228 | 2763 | 0.0010189 | 57453 Down syndrome cell adhesion molecule like 1                             |
| GO plasma membrane | 228 | 2763 | 0.0010189 | 57488 extended synaptotagmin-like protein 2                                   |
| GO plasma membrane | 228 | 2763 | 0.0010189 | 57512 G protein-coupled receptor 158                                          |
| GO plasma membrane | 228 | 2763 | 0.0010189 | 57620 stromal interaction molecule 2                                          |
| GO plasma membrane | 228 | 2763 | 0.0010189 | 5774 protein tyrosine phosphatase, non-receptor type 3                        |
| GO plasma membrane | 228 | 2763 | 0.0010189 | 57799 RAB40C, member RAS oncogene family                                      |
| GO plasma membrane | 228 | 2763 | 0.0010189 | 57863 cell adhesion molecule 3                                                |
| GO plasma membrane | 228 | 2763 | 0.0010189 | 5791 protein tyrosine phosphatase, receptor type, E                           |
| GO plasma membrane | 228 | 2763 | 0.0010189 | 5801 protein tyrosine phosphatase, receptor type, R                           |
| GO plasma membrane | 228 | 2763 | 0.0010189 | 629 complement factor B                                                       |
| GO plasma membrane | 228 | 2763 | 0.0010189 | 6402 selectin L                                                               |
| GO plasma membrane | 228 | 2763 | 0.0010189 | 64083 golgi phosphoprotein 3 (coat-protein)                                   |
| GO plasma membrane | 228 | 2763 | 0.0010189 | 64127 nucleotide-binding oligomerization domain containing 2                  |
| GO plasma membrane | 228 | 2763 | 0.0010189 | 6446 serum/glucocorticoid regulated kinase 1                                  |
| GO plasma membrane | 228 | 2763 | 0.0010189 | 6563 solute carrier family 14 (urea transporter), member 1 (Kidd blood group) |
| GO plasma membrane | 228 | 2763 | 0.0010189 | 6622 synuclein, alpha (non A4 component of amyloid precursor)                 |
| GO plasma membrane | 228 | 2763 | 0.0010189 | 6751 somatostatin receptor 1                                                  |
| GO plasma membrane | 228 | 2763 | 0.0010189 | 6812 syntaxin binding protein 1                                               |
| GO plasma membrane | 228 | 2763 | 0.0010189 | 682 basigin (Ok blood group)                                                  |
| GO plasma membrane | 228 | 2763 | 0.0010189 | 684 bone marrow stromal cell antigen 2                                        |
| GO plasma membrane | 228 | 2763 | 0.0010189 | 6857 synaptotagmin I                                                          |
| GO plasma membrane | 228 | 2763 | 0.0010189 | 7049 transforming growth factor, beta receptor III                            |
| GO plasma membrane | 228 | 2763 | 0.0010189 | 7097 toll-like receptor 2                                                     |
| GO plasma membrane | 228 | 2763 | 0.0010189 | 7099 toll-like receptor 4                                                     |
| GO plasma membrane | 228 | 2763 | 0.0010189 | 7100 toll-like receptor 5                                                     |
| GO plasma membrane | 228 | 2763 | 0.0010189 | 7106 tetraspanin 4                                                            |
| GO plasma membrane | 228 | 2763 | 0.0010189 | 7133 tumor necrosis factor receptor superfamily, member 1B                    |
| GO plasma membrane | 228 | 2763 | 0.0010189 | 7223 transient receptor potential cation channel, subfamily C, member 4       |
| GO plasma membrane | 228 | 2763 | 0.0010189 | 729993 shisa homolog 9 ( <i>Xenopus laevis</i> )                              |

|                    |     |      |           |                                                                             |
|--------------------|-----|------|-----------|-----------------------------------------------------------------------------|
| GO plasma membrane | 228 | 2763 | 0.0010189 | 731 complement component 8, alpha polypeptide                               |
| GO plasma membrane | 228 | 2763 | 0.0010189 | 774 calcium channel, voltage-dependent, N type, alpha 1B subunit            |
| GO plasma membrane | 228 | 2763 | 0.0010189 | 7852 chemokine (C-X-C motif) receptor 4                                     |
| GO plasma membrane | 228 | 2763 | 0.0010189 | 79092 caspase recruitment domain family, member 14                          |
| GO plasma membrane | 228 | 2763 | 0.0010189 | 79689 STEAP family member 4                                                 |
| GO plasma membrane | 228 | 2763 | 0.0010189 | 799 calcitonin receptor                                                     |
| GO plasma membrane | 228 | 2763 | 0.0010189 | 81285 olfactory receptor, family 51, subfamily E, member 2                  |
| GO plasma membrane | 228 | 2763 | 0.0010189 | 81470 olfactory receptor, family 2, subfamily G, member 2                   |
| GO plasma membrane | 228 | 2763 | 0.0010189 | 83604 transmembrane protein 47                                              |
| GO plasma membrane | 228 | 2763 | 0.0010189 | 84059 G protein-coupled receptor 98                                         |
| GO plasma membrane | 228 | 2763 | 0.0010189 | 8434 reversion-inducing-cysteine-rich protein with kazal motifs             |
| GO plasma membrane | 228 | 2763 | 0.0010189 | 8519 interferon induced transmembrane protein 1 (9-27)                      |
| GO plasma membrane | 228 | 2763 | 0.0010189 | 8527 diacylglycerol kinase, delta 130kDa                                    |
| GO plasma membrane | 228 | 2763 | 0.0010189 | 8600 tumor necrosis factor (ligand) superfamily, member 11                  |
| GO plasma membrane | 228 | 2763 | 0.0010189 | 8631 src kinase associated phosphoprotein 1                                 |
| GO plasma membrane | 228 | 2763 | 0.0010189 | 8660 insulin receptor substrate 2                                           |
| GO plasma membrane | 228 | 2763 | 0.0010189 | 8671 solute carrier family 4, sodium bicarbonate cotransporter, member 4    |
| GO plasma membrane | 228 | 2763 | 0.0010189 | 8740 tumor necrosis factor (ligand) superfamily, member 14                  |
| GO plasma membrane | 228 | 2763 | 0.0010189 | 8744 tumor necrosis factor (ligand) superfamily, member 9                   |
| GO plasma membrane | 228 | 2763 | 0.0010189 | 8794 tumor necrosis factor receptor superfamily, member 10c, decoy without  |
| GO plasma membrane | 228 | 2763 | 0.0010189 | 8839 WNT1 inducible signaling pathway protein 2                             |
| GO plasma membrane | 228 | 2763 | 0.0010189 | 8842 prominin 1                                                             |
| GO plasma membrane | 228 | 2763 | 0.0010189 | 8875 vanin 2                                                                |
| GO plasma membrane | 228 | 2763 | 0.0010189 | 8912 calcium channel, voltage-dependent, T type, alpha 1H subunit           |
| GO plasma membrane | 228 | 2763 | 0.0010189 | 8973 cholinergic receptor, nicotinic, alpha 6                               |
| GO plasma membrane | 228 | 2763 | 0.0010189 | 9071 claudin 10                                                             |
| GO plasma membrane | 228 | 2763 | 0.0010189 | 91653 Boc homolog (mouse)                                                   |
| GO plasma membrane | 228 | 2763 | 0.0010189 | 9194 solute carrier family 16, member 7 (monocarboxylic acid transporter 2) |
| GO plasma membrane | 228 | 2763 | 0.0010189 | 929 CD14 molecule                                                           |
| GO plasma membrane | 228 | 2763 | 0.0010189 | 94025 mucin 16, cell surface associated                                     |
| GO plasma membrane | 228 | 2763 | 0.0010189 | 9414 tight junction protein 2 (zona occludens 2)                            |
| GO plasma membrane | 228 | 2763 | 0.0010189 | 952 CD38 molecule                                                           |
| GO plasma membrane | 228 | 2763 | 0.0010189 | 961 CD47 molecule                                                           |
| GO plasma membrane | 228 | 2763 | 0.0010189 | 9619 ATP-binding cassette, sub-family G (WHITE), member 1                   |
| GO plasma membrane | 228 | 2763 | 0.0010189 | 9892 synaptosomal-associated protein, 91kDa homolog (mouse)                 |
| GO plasma membrane | 228 | 2763 | 0.0010189 | 9962 solute carrier family 23 (nucleobase transporters), member 2           |

|                                       |     |      |           |                                                                            |
|---------------------------------------|-----|------|-----------|----------------------------------------------------------------------------|
| GO plasma membrane                    | 228 | 2763 | 0.0010189 | 9966 tumor necrosis factor (ligand) superfamily, member 15                 |
| GO voltage-gated ion channel activity | 21  | 147  | 0.0010346 | 10008 potassium voltage-gated channel, Isk-related family, member 3        |
| GO voltage-gated ion channel activity | 21  | 147  | 0.0010346 | 1193 chloride intracellular channel 2                                      |
| GO voltage-gated ion channel activity | 21  | 147  | 0.0010346 | 157855 potassium channel, subfamily U, member 1                            |
| GO voltage-gated ion channel activity | 21  | 147  | 0.0010346 | 259232 sodium leak channel, non-selective                                  |
| GO voltage-gated ion channel activity | 21  | 147  | 0.0010346 | 27035 NADPH oxidase 1                                                      |
| GO voltage-gated ion channel activity | 21  | 147  | 0.0010346 | 3759 potassium inwardly-rectifying channel, subfamily J, member 2          |
| GO voltage-gated ion channel activity | 21  | 147  | 0.0010346 | 3773 potassium inwardly-rectifying channel, subfamily J, member 16         |
| GO voltage-gated ion channel activity | 21  | 147  | 0.0010346 | 3775 potassium channel, subfamily K, member 1                              |
| GO voltage-gated ion channel activity | 21  | 147  | 0.0010346 | 3786 potassium voltage-gated channel, KQT-like subfamily, member 3         |
| GO voltage-gated ion channel activity | 21  | 147  | 0.0010346 | 3790 potassium voltage-gated channel, delayed-rectifier, subfamily S, memb |
| GO voltage-gated ion channel activity | 21  | 147  | 0.0010346 | 53373 two pore segment channel 1                                           |
| GO voltage-gated ion channel activity | 21  | 147  | 0.0010346 | 53405 chloride intracellular channel 5                                     |
| GO voltage-gated ion channel activity | 21  | 147  | 0.0010346 | 55799 calcium channel, voltage-dependent, alpha 2/delta subunit 3          |
| GO voltage-gated ion channel activity | 21  | 147  | 0.0010346 | 6330 sodium channel, voltage-gated, type IV, beta                          |
| GO voltage-gated ion channel activity | 21  | 147  | 0.0010346 | 774 calcium channel, voltage-dependent, N type, alpha 1B subunit           |
| GO voltage-gated ion channel activity | 21  | 147  | 0.0010346 | 783 calcium channel, voltage-dependent, beta 2 subunit                     |
| GO voltage-gated ion channel activity | 21  | 147  | 0.0010346 | 8514 potassium voltage-gated channel, shaker-related subfamily, beta memi  |
| GO voltage-gated ion channel activity | 21  | 147  | 0.0010346 | 8645 potassium channel, subfamily K, member 5                              |
| GO voltage-gated ion channel activity | 21  | 147  | 0.0010346 | 8911 calcium channel, voltage-dependent, T type, alpha 1I subunit          |
| GO voltage-gated ion channel activity | 21  | 147  | 0.0010346 | 8912 calcium channel, voltage-dependent, T type, alpha 1H subunit          |
| GO voltage-gated ion channel activity | 21  | 147  | 0.0010346 | 93589 calcium channel, voltage-dependent, alpha 2/delta subunit 4          |
| GO anchored to membrane               | 17  | 109  | 0.0011358 | 1048 carcinoembryonic antigen-related cell adhesion molecule 5             |
| GO anchored to membrane               | 17  | 109  | 0.0011358 | 1087 carcinoembryonic antigen-related cell adhesion molecule 7             |
| GO anchored to membrane               | 17  | 109  | 0.0011358 | 10942 protease, serine, 21 (testisin)                                      |
| GO anchored to membrane               | 17  | 109  | 0.0011358 | 130576 LY6/PLAUR domain containing 6B                                      |
| GO anchored to membrane               | 17  | 109  | 0.0011358 | 1368 carboxypeptidase M                                                    |
| GO anchored to membrane               | 17  | 109  | 0.0011358 | 1604 CD55 molecule, decay accelerating factor for complement (Cromer blo   |
| GO anchored to membrane               | 17  | 109  | 0.0011358 | 2239 glypican 4                                                            |
| GO anchored to membrane               | 17  | 109  | 0.0011358 | 2262 glypican 5                                                            |
| GO anchored to membrane               | 17  | 109  | 0.0011358 | 4680 carcinoembryonic antigen-related cell adhesion molecule 6 (non-specif |
| GO anchored to membrane               | 17  | 109  | 0.0011358 | 4684 neural cell adhesion molecule 1                                       |
| GO anchored to membrane               | 17  | 109  | 0.0011358 | 51299 neuritin 1                                                           |
| GO anchored to membrane               | 17  | 109  | 0.0011358 | 55600 intelectin 1 (galactofuranose binding)                               |
| GO anchored to membrane               | 17  | 109  | 0.0011358 | 684 bone marrow stromal cell antigen 2                                     |
| GO anchored to membrane               | 17  | 109  | 0.0011358 | 8434 reversion-inducing-cysteine-rich protein with kazal motifs            |

|                                             |    |     |           |                                                                              |
|---------------------------------------------|----|-----|-----------|------------------------------------------------------------------------------|
| GO anchored to membrane                     | 17 | 109 | 0.0011358 | 8794 tumor necrosis factor receptor superfamily, member 10c, decoy withou    |
| GO anchored to membrane                     | 17 | 109 | 0.0011358 | 8875 vanin 2                                                                 |
| GO anchored to membrane                     | 17 | 109 | 0.0011358 | 929 CD14 molecule                                                            |
| GO positive regulation of chemokine pro     | 5  | 13  | 0.0011977 | 3569 interleukin 6 (interferon, beta 2)                                      |
| GO positive regulation of chemokine pro     | 5  | 13  | 0.0011977 | 3570 interleukin 6 receptor                                                  |
| GO positive regulation of chemokine pro     | 5  | 13  | 0.0011977 | 7097 toll-like receptor 2                                                    |
| GO positive regulation of chemokine pro     | 5  | 13  | 0.0011977 | 7098 toll-like receptor 3                                                    |
| GO positive regulation of chemokine pro     | 5  | 13  | 0.0011977 | 7099 toll-like receptor 4                                                    |
| GO epithelial cell maturation involved in   | 3  | 4   | 0.0012092 | 10116 fem-1 homolog b (C. elegans)                                           |
| GO epithelial cell maturation involved in   | 3  | 4   | 0.0012092 | 10481 homeobox B13                                                           |
| GO epithelial cell maturation involved in   | 3  | 4   | 0.0012092 | 3169 forkhead box A1                                                         |
| GO activin receptor activity, type I        | 3  | 4   | 0.0012092 | 130399 activin A receptor, type IC                                           |
| GO activin receptor activity, type I        | 3  | 4   | 0.0012092 | 91 activin A receptor, type IB                                               |
| GO activin receptor activity, type I        | 3  | 4   | 0.0012092 | 94 activin A receptor type II-like 1                                         |
| GO secretory columnar luminal epithelial    | 3  | 4   | 0.0012092 | 3169 forkhead box A1                                                         |
| GO secretory columnar luminal epithelial    | 3  | 4   | 0.0012092 | 4851 Notch homolog 1, translocation-associated (Drosophila)                  |
| GO secretory columnar luminal epithelial    | 3  | 4   | 0.0012092 | 6256 retinoid X receptor, alpha                                              |
| GO positive regulation of toll-like receptc | 3  | 4   | 0.0012092 | 7097 toll-like receptor 2                                                    |
| GO positive regulation of toll-like receptc | 3  | 4   | 0.0012092 | 7098 toll-like receptor 3                                                    |
| GO positive regulation of toll-like receptc | 3  | 4   | 0.0012092 | 7100 toll-like receptor 5                                                    |
| GO apical plasma membrane                   | 22 | 159 | 0.0012219 | 10312 T-cell, immune regulator 1, ATPase, H+ transporting, lysosomal V0 subu |
| GO apical plasma membrane                   | 22 | 159 | 0.0012219 | 10568 solute carrier family 34 (sodium phosphate), member 2                  |
| GO apical plasma membrane                   | 22 | 159 | 0.0012219 | 1080 cystic fibrosis transmembrane conductance regulator (ATP-binding cas:   |
| GO apical plasma membrane                   | 22 | 159 | 0.0012219 | 113235 solute carrier family 46 (folate transporter), member 1               |
| GO apical plasma membrane                   | 22 | 159 | 0.0012219 | 114569 mal, T-cell differentiation protein 2                                 |
| GO apical plasma membrane                   | 22 | 159 | 0.0012219 | 1508 cathepsin B                                                             |
| GO apical plasma membrane                   | 22 | 159 | 0.0012219 | 154 adrenergic, beta-2-, receptor, surface                                   |
| GO apical plasma membrane                   | 22 | 159 | 0.0012219 | 1803 dipeptidyl-peptidase 4                                                  |
| GO apical plasma membrane                   | 22 | 159 | 0.0012219 | 23418 crumbs homolog 1 (Drosophila)                                          |
| GO apical plasma membrane                   | 22 | 159 | 0.0012219 | 3570 interleukin 6 receptor                                                  |
| GO apical plasma membrane                   | 22 | 159 | 0.0012219 | 358 aquaporin 1 (Colton blood group)                                         |
| GO apical plasma membrane                   | 22 | 159 | 0.0012219 | 368 ATP-binding cassette, sub-family C (CFTR/MRP), member 6                  |
| GO apical plasma membrane                   | 22 | 159 | 0.0012219 | 3775 potassium channel, subfamily K, member 1                                |
| GO apical plasma membrane                   | 22 | 159 | 0.0012219 | 4008 LIM domain 7                                                            |
| GO apical plasma membrane                   | 22 | 159 | 0.0012219 | 4582 mucin 1, cell surface associated                                        |
| GO apical plasma membrane                   | 22 | 159 | 0.0012219 | 50617 ATPase, H+ transporting, lysosomal V0 subunit a4                       |



|    |                        |    |     |           |                                                                             |
|----|------------------------|----|-----|-----------|-----------------------------------------------------------------------------|
| GO | apical plasma membrane | 22 | 159 | 0.0012219 | 5244 ATP-binding cassette, sub-family B (MDR/TAP), member 4                 |
| GO | apical plasma membrane | 22 | 159 | 0.0012219 | 55867 solute carrier family 22 (organic anion/urate transporter), member 11 |
| GO | apical plasma membrane | 22 | 159 | 0.0012219 | 57619 shroom family member 3                                                |
| GO | apical plasma membrane | 22 | 159 | 0.0012219 | 5873 RAB27A, member RAS oncogene family                                     |
| GO | apical plasma membrane | 22 | 159 | 0.0012219 | 8842 prominin 1                                                             |
| GO | apical plasma membrane | 22 | 159 | 0.0012219 | 9962 solute carrier family 23 (nucleobase transporters), member 2           |
| GO | immune response        | 35 | 303 | 0.0016375 | 10216 proteoglycan 4                                                        |
| GO | immune response        | 35 | 303 | 0.0016375 | 10288 leukocyte immunoglobulin-like receptor, subfamily B (with TM and ITIM |
| GO | immune response        | 35 | 303 | 0.0016375 | 10346 tripartite motif-containing 22                                        |
| GO | immune response        | 35 | 303 | 0.0016375 | 10410 interferon induced transmembrane protein 3 (1-8U)                     |
| GO | immune response        | 35 | 303 | 0.0016375 | 10507 sema domain, immunoglobulin domain (Ig), transmembrane domain (T      |
| GO | immune response        | 35 | 303 | 0.0016375 | 10964 interferon-induced protein 44-like                                    |
| GO | immune response        | 35 | 303 | 0.0016375 | 1380 complement component (3d/Epstein Barr virus) receptor 2                |
| GO | immune response        | 35 | 303 | 0.0016375 | 157869 chromosome 8 open reading frame 84                                   |
| GO | immune response        | 35 | 303 | 0.0016375 | 2634 guanylate binding protein 2, interferon-inducible                      |
| GO | immune response        | 35 | 303 | 0.0016375 | 29126 CD274 molecule                                                        |
| GO | immune response        | 35 | 303 | 0.0016375 | 2921 chemokine (C-X-C motif) ligand 3                                       |
| GO | immune response        | 35 | 303 | 0.0016375 | 3134 major histocompatibility complex, class I, F                           |
| GO | immune response        | 35 | 303 | 0.0016375 | 3512 immunoglobulin J polypeptide, linker protein for immunoglobulin alpha; |
| GO | immune response        | 35 | 303 | 0.0016375 | 3561 interleukin 2 receptor, gamma (severe combined immunodeficiency)       |
| GO | immune response        | 35 | 303 | 0.0016375 | 4065 lymphocyte antigen 75                                                  |
| GO | immune response        | 35 | 303 | 0.0016375 | 4783 nuclear factor, interleukin 3 regulated                                |
| GO | immune response        | 35 | 303 | 0.0016375 | 4851 Notch homolog 1, translocation-associated (Drosophila)                 |
| GO | immune response        | 35 | 303 | 0.0016375 | 4939 2'-5'-oligoadenylate synthetase 2, 69/71kDa                            |
| GO | immune response        | 35 | 303 | 0.0016375 | 56477 chemokine (C-C motif) ligand 28                                       |
| GO | immune response        | 35 | 303 | 0.0016375 | 5724 platelet-activating factor receptor                                    |
| GO | immune response        | 35 | 303 | 0.0016375 | 5734 prostaglandin E receptor 4 (subtype EP4)                               |
| GO | immune response        | 35 | 303 | 0.0016375 | 6372 chemokine (C-X-C motif) ligand 6 (granulocyte chemotactic protein 2)   |
| GO | immune response        | 35 | 303 | 0.0016375 | 6374 chemokine (C-X-C motif) ligand 5                                       |
| GO | immune response        | 35 | 303 | 0.0016375 | 7049 transforming growth factor, beta receptor III                          |
| GO | immune response        | 35 | 303 | 0.0016375 | 7097 toll-like receptor 2                                                   |
| GO | immune response        | 35 | 303 | 0.0016375 | 7099 toll-like receptor 4                                                   |
| GO | immune response        | 35 | 303 | 0.0016375 | 7133 tumor necrosis factor receptor superfamily, member 1B                  |
| GO | immune response        | 35 | 303 | 0.0016375 | 715 complement component 1, r subcomponent                                  |
| GO | immune response        | 35 | 303 | 0.0016375 | 718 complement component 3                                                  |
| GO | immune response        | 35 | 303 | 0.0016375 | 731 complement component 8, alpha polypeptide                               |

|                                            |    |     |           |                                                                                |
|--------------------------------------------|----|-----|-----------|--------------------------------------------------------------------------------|
| GO immune response                         | 35 | 303 | 0.0016375 | 8600 tumor necrosis factor (ligand) superfamily, member 11                     |
| GO immune response                         | 35 | 303 | 0.0016375 | 8740 tumor necrosis factor (ligand) superfamily, member 14                     |
| GO immune response                         | 35 | 303 | 0.0016375 | 8744 tumor necrosis factor (ligand) superfamily, member 9                      |
| GO immune response                         | 35 | 303 | 0.0016375 | 9567 GTP binding protein 1                                                     |
| GO immune response                         | 35 | 303 | 0.0016375 | 9966 tumor necrosis factor (ligand) superfamily, member 15                     |
| GO response to retinoic acid               | 8  | 34  | 0.0017063 | 1843 dual specificity phosphatase 1                                            |
| GO response to retinoic acid               | 8  | 34  | 0.0017063 | 2033 E1A binding protein p300                                                  |
| GO response to retinoic acid               | 8  | 34  | 0.0017063 | 3294 hydroxysteroid (17-beta) dehydrogenase 2                                  |
| GO response to retinoic acid               | 8  | 34  | 0.0017063 | 429 achaete-scute complex homolog 1 (Drosophila)                               |
| GO response to retinoic acid               | 8  | 34  | 0.0017063 | 5950 retinol binding protein 4, plasma                                         |
| GO response to retinoic acid               | 8  | 34  | 0.0017063 | 6256 retinoid X receptor, alpha                                                |
| GO response to retinoic acid               | 8  | 34  | 0.0017063 | 652 bone morphogenetic protein 4                                               |
| GO response to retinoic acid               | 8  | 34  | 0.0017063 | 952 CD38 molecule                                                              |
| GO response to cytokine stimulus           | 10 | 50  | 0.0017843 | 1080 cystic fibrosis transmembrane conductance regulator (ATP-binding cas:     |
| GO response to cytokine stimulus           | 10 | 50  | 0.0017843 | 10906 TRAF-type zinc finger domain containing 1                                |
| GO response to cytokine stimulus           | 10 | 50  | 0.0017843 | 2353 FBJ murine osteosarcoma viral oncogene homolog                            |
| GO response to cytokine stimulus           | 10 | 50  | 0.0017843 | 3570 interleukin 6 receptor                                                    |
| GO response to cytokine stimulus           | 10 | 50  | 0.0017843 | 3725 jun oncogene                                                              |
| GO response to cytokine stimulus           | 10 | 50  | 0.0017843 | 3726 jun B proto-oncogene                                                      |
| GO response to cytokine stimulus           | 10 | 50  | 0.0017843 | 4170 myeloid cell leukemia sequence 1 (BCL2-related)                           |
| GO response to cytokine stimulus           | 10 | 50  | 0.0017843 | 5371 promyelocytic leukemia                                                    |
| GO response to cytokine stimulus           | 10 | 50  | 0.0017843 | 6778 signal transducer and activator of transcription 6, interleukin-4 inducec |
| GO response to cytokine stimulus           | 10 | 50  | 0.0017843 | 9021 suppressor of cytokine signaling 3                                        |
| GO positive regulation of transcription fr | 34 | 295 | 0.0019637 | 10891 peroxisome proliferator-activated receptor gamma, coactivator 1 alpha    |
| GO positive regulation of transcription fr | 34 | 295 | 0.0019637 | 154 adrenergic, beta-2-, receptor, surface                                     |
| GO positive regulation of transcription fr | 34 | 295 | 0.0019637 | 1958 early growth response 1                                                   |
| GO positive regulation of transcription fr | 34 | 295 | 0.0019637 | 1959 early growth response 2                                                   |
| GO positive regulation of transcription fr | 34 | 295 | 0.0019637 | 2033 E1A binding protein p300                                                  |
| GO positive regulation of transcription fr | 34 | 295 | 0.0019637 | 2296 forkhead box C1                                                           |
| GO positive regulation of transcription fr | 34 | 295 | 0.0019637 | 2303 forkhead box C2 (MFH-1, mesenchyme forkhead 1)                            |
| GO positive regulation of transcription fr | 34 | 295 | 0.0019637 | 23373 CREB regulated transcription coactivator 1                               |
| GO positive regulation of transcription fr | 34 | 295 | 0.0019637 | 2353 FBJ murine osteosarcoma viral oncogene homolog                            |
| GO positive regulation of transcription fr | 34 | 295 | 0.0019637 | 2737 GLI family zinc finger 3                                                  |
| GO positive regulation of transcription fr | 34 | 295 | 0.0019637 | 28996 homeodomain interacting protein kinase 2                                 |
| GO positive regulation of transcription fr | 34 | 295 | 0.0019637 | 3164 nuclear receptor subfamily 4, group A, member 1                           |
| GO positive regulation of transcription fr | 34 | 295 | 0.0019637 | 3569 interleukin 6 (interferon, beta 2)                                        |

|    |                                                      |    |     |           |                                                                                  |
|----|------------------------------------------------------|----|-----|-----------|----------------------------------------------------------------------------------|
| GO | positive regulation of transcription fr              | 34 | 295 | 0.0019637 | 3659 interferon regulatory factor 1                                              |
| GO | positive regulation of transcription fr              | 34 | 295 | 0.0019637 | 3725 jun oncogene                                                                |
| GO | positive regulation of transcription fr              | 34 | 295 | 0.0019637 | 375790 agrin                                                                     |
| GO | positive regulation of transcription fr              | 34 | 295 | 0.0019637 | 4087 SMAD family member 2                                                        |
| GO | positive regulation of transcription fr              | 34 | 295 | 0.0019637 | 4212 Meis homeobox 2                                                             |
| GO | positive regulation of transcription fr              | 34 | 295 | 0.0019637 | 4286 microphthalmia-associated transcription factor                              |
| GO | positive regulation of transcription fr              | 34 | 295 | 0.0019637 | 429 achaete-scute complex homolog 1 (Drosophila)                                 |
| GO | positive regulation of transcription fr              | 34 | 295 | 0.0019637 | 4851 Notch homolog 1, translocation-associated (Drosophila)                      |
| GO | positive regulation of transcription fr              | 34 | 295 | 0.0019637 | 4929 nuclear receptor subfamily 4, group A, member 2                             |
| GO | positive regulation of transcription fr              | 34 | 295 | 0.0019637 | 5083 paired box 9                                                                |
| GO | positive regulation of transcription fr              | 34 | 295 | 0.0019637 | 51621 Kruppel-like factor 13                                                     |
| GO | positive regulation of transcription fr              | 34 | 295 | 0.0019637 | 5325 pleiomorphic adenoma gene-like 1                                            |
| GO | positive regulation of transcription fr              | 34 | 295 | 0.0019637 | 5465 peroxisome proliferator-activated receptor alpha                            |
| GO | positive regulation of transcription fr              | 34 | 295 | 0.0019637 | 6256 retinoid X receptor, alpha                                                  |
| GO | positive regulation of transcription fr              | 34 | 295 | 0.0019637 | 64651 cysteine-serine-rich nuclear protein 1                                     |
| GO | positive regulation of transcription fr              | 34 | 295 | 0.0019637 | 6778 signal transducer and activator of transcription 6, interleukin-4 inducible |
| GO | positive regulation of transcription fr              | 34 | 295 | 0.0019637 | 8013 nuclear receptor subfamily 4, group A, member 3                             |
| GO | positive regulation of transcription fr              | 34 | 295 | 0.0019637 | 8631 src kinase associated phosphoprotein 1                                      |
| GO | positive regulation of transcription fr              | 34 | 295 | 0.0019637 | 91 activin A receptor, type IB                                                   |
| GO | positive regulation of transcription fr              | 34 | 295 | 0.0019637 | 9935 v-maf musculoaponeurotic fibrosarcoma oncogene homolog B (avian)            |
| GO | positive regulation of transcription fr              | 34 | 295 | 0.0019637 | 9971 nuclear receptor subfamily 1, group H, member 4                             |
| GO | retinol metabolic process                            | 4  | 9   | 0.0020714 | 10170 dehydrogenase/reductase (SDR family) member 9                              |
| GO | retinol metabolic process                            | 4  | 9   | 0.0020714 | 157506 retinol dehydrogenase 10 (all-trans)                                      |
| GO | retinol metabolic process                            | 4  | 9   | 0.0020714 | 195814 short chain dehydrogenase/reductase family 16C, member 5                  |
| GO | retinol metabolic process                            | 4  | 9   | 0.0020714 | 5950 retinol binding protein 4, plasma                                           |
| GO | response to fatty acid                               | 4  | 9   | 0.0020714 | 2033 E1A binding protein p300                                                    |
| GO | response to fatty acid                               | 4  | 9   | 0.0020714 | 5122 proprotein convertase subtilisin/kexin type 1                               |
| GO | response to fatty acid                               | 4  | 9   | 0.0020714 | 7097 toll-like receptor 2                                                        |
| GO | response to fatty acid                               | 4  | 9   | 0.0020714 | 7099 toll-like receptor 4                                                        |
| GO | ligand-regulated transcription factor                | 4  | 9   | 0.0020714 | 4853 Notch homolog 2 (Drosophila)                                                |
| GO | ligand-regulated transcription factor                | 4  | 9   | 0.0020714 | 5465 peroxisome proliferator-activated receptor alpha                            |
| GO | ligand-regulated transcription factor                | 4  | 9   | 0.0020714 | 6256 retinoid X receptor, alpha                                                  |
| GO | ligand-regulated transcription factor                | 4  | 9   | 0.0020714 | 7026 nuclear receptor subfamily 2, group F, member 2                             |
| GO | positive regulation of interleukin-12 p70 production | 4  | 9   | 0.0020714 | 64127 nucleotide-binding oligomerization domain containing 2                     |
| GO | positive regulation of interleukin-12 p70 production | 4  | 9   | 0.0020714 | 7097 toll-like receptor 2                                                        |
| GO | positive regulation of interleukin-12 p70 production | 4  | 9   | 0.0020714 | 7098 toll-like receptor 3                                                        |

|                                            |    |     |           |                                                                                |
|--------------------------------------------|----|-----|-----------|--------------------------------------------------------------------------------|
| GO positive regulation of interleukin-12 p | 4  | 9   | 0.0020714 | 7099 toll-like receptor 4                                                      |
| GO circadian rhythm                        | 8  | 35  | 0.0020813 | 1960 early growth response 3                                                   |
| GO circadian rhythm                        | 8  | 35  | 0.0020813 | 3725 jun oncogene                                                              |
| GO circadian rhythm                        | 8  | 35  | 0.0020813 | 50865 heme binding protein 1                                                   |
| GO circadian rhythm                        | 8  | 35  | 0.0020813 | 5187 period homolog 1 (Drosophila)                                             |
| GO circadian rhythm                        | 8  | 35  | 0.0020813 | 6096 RAR-related orphan receptor B                                             |
| GO circadian rhythm                        | 8  | 35  | 0.0020813 | 8553 basic helix-loop-helix family, member e40                                 |
| GO circadian rhythm                        | 8  | 35  | 0.0020813 | 8864 period homolog 2 (Drosophila)                                             |
| GO circadian rhythm                        | 8  | 35  | 0.0020813 | 9572 nuclear receptor subfamily 1, group D, member 1                           |
| GO positive regulation of interleukin-6 pr | 6  | 21  | 0.0022406 | 3569 interleukin 6 (interferon, beta 2)                                        |
| GO positive regulation of interleukin-6 pr | 6  | 21  | 0.0022406 | 3570 interleukin 6 receptor                                                    |
| GO positive regulation of interleukin-6 pr | 6  | 21  | 0.0022406 | 64127 nucleotide-binding oligomerization domain containing 2                   |
| GO positive regulation of interleukin-6 pr | 6  | 21  | 0.0022406 | 7097 toll-like receptor 2                                                      |
| GO positive regulation of interleukin-6 pr | 6  | 21  | 0.0022406 | 7098 toll-like receptor 3                                                      |
| GO positive regulation of interleukin-6 pr | 6  | 21  | 0.0022406 | 7099 toll-like receptor 4                                                      |
| GO multicellular organismal developmen     | 83 | 890 | 0.0023224 | 10085 EGF-like repeats and discoidin I-like domains 3                          |
| GO multicellular organismal developmen     | 83 | 890 | 0.0023224 | 10252 sprouty homolog 1, antagonist of FGF signaling (Drosophila)              |
| GO multicellular organismal developmen     | 83 | 890 | 0.0023224 | 10253 sprouty homolog 2 (Drosophila)                                           |
| GO multicellular organismal developmen     | 83 | 890 | 0.0023224 | 10439 olfactomedin 1                                                           |
| GO multicellular organismal developmen     | 83 | 890 | 0.0023224 | 10481 homeobox B13                                                             |
| GO multicellular organismal developmen     | 83 | 890 | 0.0023224 | 10507 sema domain, immunoglobulin domain (Ig), transmembrane domain (T         |
| GO multicellular organismal developmen     | 83 | 890 | 0.0023224 | 10752 cell adhesion molecule with homology to L1CAM (close homolog of L1)      |
| GO multicellular organismal developmen     | 83 | 890 | 0.0023224 | 10912 growth arrest and DNA-damage-inducible, gamma                            |
| GO multicellular organismal developmen     | 83 | 890 | 0.0023224 | 10913 ectodysplasin A receptor                                                 |
| GO multicellular organismal developmen     | 83 | 890 | 0.0023224 | 127343 diencephalon/mesencephalon homeobox 1                                   |
| GO multicellular organismal developmen     | 83 | 890 | 0.0023224 | 143689 piwi-like 4 (Drosophila)                                                |
| GO multicellular organismal developmen     | 83 | 890 | 0.0023224 | 1462 versican                                                                  |
| GO multicellular organismal developmen     | 83 | 890 | 0.0023224 | 150094 salt-inducible kinase 1                                                 |
| GO multicellular organismal developmen     | 83 | 890 | 0.0023224 | 158800 RhoX homeobox family, member 1                                          |
| GO multicellular organismal developmen     | 83 | 890 | 0.0023224 | 1755 deleted in malignant brain tumors 1                                       |
| GO multicellular organismal developmen     | 83 | 890 | 0.0023224 | 1948 ephrin-B2                                                                 |
| GO multicellular organismal developmen     | 83 | 890 | 0.0023224 | 1969 EPH receptor A2                                                           |
| GO multicellular organismal developmen     | 83 | 890 | 0.0023224 | 1999 E74-like factor 3 (ets domain transcription factor, epithelial-specific ) |
| GO multicellular organismal developmen     | 83 | 890 | 0.0023224 | 2122 MDS1 and EVI1 complex locus                                               |
| GO multicellular organismal developmen     | 83 | 890 | 0.0023224 | 222171 proline rich 15                                                         |
| GO multicellular organismal developmen     | 83 | 890 | 0.0023224 | 222546 regulatory factor X, 6                                                  |

|                                        |    |     |           |                                                                            |
|----------------------------------------|----|-----|-----------|----------------------------------------------------------------------------|
| GO multicellular organismal developmen | 83 | 890 | 0.0023224 | 223117 sema domain, immunoglobulin domain (Ig), short basic domain, secret |
| GO multicellular organismal developmen | 83 | 890 | 0.0023224 | 2290 forkhead box G1                                                       |
| GO multicellular organismal developmen | 83 | 890 | 0.0023224 | 2303 forkhead box C2 (MFH-1, mesenchyme forkhead 1)                        |
| GO multicellular organismal developmen | 83 | 890 | 0.0023224 | 2354 FBJ murine osteosarcoma viral oncogene homolog B                      |
| GO multicellular organismal developmen | 83 | 890 | 0.0023224 | 23654 plexin B2                                                            |
| GO multicellular organismal developmen | 83 | 890 | 0.0023224 | 23780 apolipoprotein L, 2                                                  |
| GO multicellular organismal developmen | 83 | 890 | 0.0023224 | 255743 nephronectin                                                        |
| GO multicellular organismal developmen | 83 | 890 | 0.0023224 | 26468 LIM homeobox 6                                                       |
| GO multicellular organismal developmen | 83 | 890 | 0.0023224 | 27123 dickkopf homolog 2 ( <i>Xenopus laevis</i> )                         |
| GO multicellular organismal developmen | 83 | 890 | 0.0023224 | 28982 feline leukemia virus subgroup C cellular receptor 1                 |
| GO multicellular organismal developmen | 83 | 890 | 0.0023224 | 3131 hepatic leukemia factor                                               |
| GO multicellular organismal developmen | 83 | 890 | 0.0023224 | 3142 H2.0-like homeobox                                                    |
| GO multicellular organismal developmen | 83 | 890 | 0.0023224 | 3169 forkhead box A1                                                       |
| GO multicellular organismal developmen | 83 | 890 | 0.0023224 | 342035 gliomedin                                                           |
| GO multicellular organismal developmen | 83 | 890 | 0.0023224 | 4005 LIM domain only 2 (rhombotin-like 1)                                  |
| GO multicellular organismal developmen | 83 | 890 | 0.0023224 | 4170 myeloid cell leukemia sequence 1 (BCL2-related)                       |
| GO multicellular organismal developmen | 83 | 890 | 0.0023224 | 4209 myocyte enhancer factor 2D                                            |
| GO multicellular organismal developmen | 83 | 890 | 0.0023224 | 4223 mesenchyme homeobox 2                                                 |
| GO multicellular organismal developmen | 83 | 890 | 0.0023224 | 4286 microphthalmia-associated transcription factor                        |
| GO multicellular organismal developmen | 83 | 890 | 0.0023224 | 4486 macrophage stimulating 1 receptor (c-met-related tyrosine kinase)     |
| GO multicellular organismal developmen | 83 | 890 | 0.0023224 | 4616 growth arrest and DNA-damage-inducible, beta                          |
| GO multicellular organismal developmen | 83 | 890 | 0.0023224 | 4778 nuclear factor (erythroid-derived 2), 45kDa                           |
| GO multicellular organismal developmen | 83 | 890 | 0.0023224 | 4853 Notch homolog 2 ( <i>Drosophila</i> )                                 |
| GO multicellular organismal developmen | 83 | 890 | 0.0023224 | 4915 neurotrophic tyrosine kinase, receptor, type 2                        |
| GO multicellular organismal developmen | 83 | 890 | 0.0023224 | 5063 p21 protein (Cdc42/Rac)-activated kinase 3                            |
| GO multicellular organismal developmen | 83 | 890 | 0.0023224 | 5083 paired box 9                                                          |
| GO multicellular organismal developmen | 83 | 890 | 0.0023224 | 51274 Kruppel-like factor 3 (basic)                                        |
| GO multicellular organismal developmen | 83 | 890 | 0.0023224 | 51314 thioredoxin domain containing 3 (spermatzoa)                         |
| GO multicellular organismal developmen | 83 | 890 | 0.0023224 | 5307 paired-like homeodomain 1                                             |
| GO multicellular organismal developmen | 83 | 890 | 0.0023224 | 5308 paired-like homeodomain 2                                             |
| GO multicellular organismal developmen | 83 | 890 | 0.0023224 | 5362 plexin A2                                                             |
| GO multicellular organismal developmen | 83 | 890 | 0.0023224 | 5367 pro-melanin-concentrating hormone                                     |
| GO multicellular organismal developmen | 83 | 890 | 0.0023224 | 5396 paired related homeobox 1                                             |
| GO multicellular organismal developmen | 83 | 890 | 0.0023224 | 54361 wingless-type MMTV integration site family, member 4                 |
| GO multicellular organismal developmen | 83 | 890 | 0.0023224 | 54852 progesterin and adipoQ receptor family member V                      |
| GO multicellular organismal developmen | 83 | 890 | 0.0023224 | 55124 piwi-like 2 ( <i>Drosophila</i> )                                    |

|                                        |    |     |           |                                                                             |
|----------------------------------------|----|-----|-----------|-----------------------------------------------------------------------------|
| GO multicellular organismal developmen | 83 | 890 | 0.0023224 | 56913 core 1 synthase, glycoprotein-N-acetylgalactosamine 3-beta-galactosyl |
| GO multicellular organismal developmen | 83 | 890 | 0.0023224 | 56944 olfactomedin-like 3                                                   |
| GO multicellular organismal developmen | 83 | 890 | 0.0023224 | 6096 RAR-related orphan receptor B                                          |
| GO multicellular organismal developmen | 83 | 890 | 0.0023224 | 6239 ras responsive element binding protein 1                               |
| GO multicellular organismal developmen | 83 | 890 | 0.0023224 | 64359 nucleoredoxin                                                         |
| GO multicellular organismal developmen | 83 | 890 | 0.0023224 | 684 bone marrow stromal cell antigen 2                                      |
| GO multicellular organismal developmen | 83 | 890 | 0.0023224 | 7092 tolloid-like 1                                                         |
| GO multicellular organismal developmen | 83 | 890 | 0.0023224 | 7477 wingless-type MMTV integration site family, member 7B                  |
| GO multicellular organismal developmen | 83 | 890 | 0.0023224 | 7546 Zic family member 2 (odd-paired homolog, Drosophila)                   |
| GO multicellular organismal developmen | 83 | 890 | 0.0023224 | 7869 sema domain, immunoglobulin domain (Ig), short basic domain, secret    |
| GO multicellular organismal developmen | 83 | 890 | 0.0023224 | 79820 cation channel, sperm-associated, beta                                |
| GO multicellular organismal developmen | 83 | 890 | 0.0023224 | 79971 wntless homolog (Drosophila)                                          |
| GO multicellular organismal developmen | 83 | 890 | 0.0023224 | 81693 amnionless homolog (mouse)                                            |
| GO multicellular organismal developmen | 83 | 890 | 0.0023224 | 8313 axin 2                                                                 |
| GO multicellular organismal developmen | 83 | 890 | 0.0023224 | 8382 non-metastatic cells 5, protein expressed in (nucleoside-diphosphate k |
| GO multicellular organismal developmen | 83 | 890 | 0.0023224 | 83890 spermatogenesis associated 9                                          |
| GO multicellular organismal developmen | 83 | 890 | 0.0023224 | 84033 obscurin, cytoskeletal calmodulin and titin-interacting RhoGEF        |
| GO multicellular organismal developmen | 83 | 890 | 0.0023224 | 8527 diacylglycerol kinase, delta 130kDa                                    |
| GO multicellular organismal developmen | 83 | 890 | 0.0023224 | 85416 Zic family member 5 (odd-paired homolog, Drosophila)                  |
| GO multicellular organismal developmen | 83 | 890 | 0.0023224 | 8600 tumor necrosis factor (ligand) superfamily, member 11                  |
| GO multicellular organismal developmen | 83 | 890 | 0.0023224 | 91461 protein kinase domain containing, cytoplasmic homolog (mouse)         |
| GO multicellular organismal developmen | 83 | 890 | 0.0023224 | 9271 piwi-like 1 (Drosophila)                                               |
| GO multicellular organismal developmen | 83 | 890 | 0.0023224 | 9435 carbohydrate (N-acetylglucosamine-6-O) sulfotransferase 2              |
| GO multicellular organismal developmen | 83 | 890 | 0.0023224 | 9496 T-box 4                                                                |
| GO multicellular organismal developmen | 83 | 890 | 0.0023224 | 9633 metallothionein-like 5, testis-specific (tesmin)                       |
| GO multicellular organismal developmen | 83 | 890 | 0.0023224 | 9904 RNA binding motif protein 19                                           |
| GO filopodium assembly                 | 5  | 15  | 0.0024909 | 152273 FYVE, RhoGEF and PH domain containing 5                              |
| GO filopodium assembly                 | 5  | 15  | 0.0024909 | 23092 Rho GTPase activating protein 26                                      |
| GO filopodium assembly                 | 5  | 15  | 0.0024909 | 3691 integrin, beta 4                                                       |
| GO filopodium assembly                 | 5  | 15  | 0.0024909 | 80115 BAI1-associated protein 2-like 2                                      |
| GO filopodium assembly                 | 5  | 15  | 0.0024909 | 9788 metastasis suppressor 1                                                |
| GO cell adhesion                       | 53 | 522 | 0.0025144 | 1004 cadherin 6, type 2, K-cadherin (fetal kidney)                          |
| GO cell adhesion                       | 53 | 522 | 0.0025144 | 10076 protein tyrosine phosphatase, receptor type, U                        |
| GO cell adhesion                       | 53 | 522 | 0.0025144 | 10085 EGF-like repeats and discoidin I-like domains 3                       |
| GO cell adhesion                       | 53 | 522 | 0.0025144 | 1009 cadherin 11, type 2, OB-cadherin (osteoblast)                          |
| GO cell adhesion                       | 53 | 522 | 0.0025144 | 1014 cadherin 16, KSP-cadherin                                              |

|                  |    |     |           |                                                                           |
|------------------|----|-----|-----------|---------------------------------------------------------------------------|
| GO cell adhesion | 53 | 522 | 0.0025144 | 1016 cadherin 18, type 2                                                  |
| GO cell adhesion | 53 | 522 | 0.0025144 | 10205 myelin protein zero-like 2                                          |
| GO cell adhesion | 53 | 522 | 0.0025144 | 10417 spondin 2, extracellular matrix protein                             |
| GO cell adhesion | 53 | 522 | 0.0025144 | 10418 spondin 1, extracellular matrix protein                             |
| GO cell adhesion | 53 | 522 | 0.0025144 | 10507 sema domain, immunoglobulin domain (Ig), transmembrane domain (T    |
| GO cell adhesion | 53 | 522 | 0.0025144 | 10516 fibulin 5                                                           |
| GO cell adhesion | 53 | 522 | 0.0025144 | 10752 cell adhesion molecule with homology to L1CAM (close homolog of L1) |
| GO cell adhesion | 53 | 522 | 0.0025144 | 11187 plakophilin 3                                                       |
| GO cell adhesion | 53 | 522 | 0.0025144 | 1295 collagen, type VIII, alpha 1                                         |
| GO cell adhesion | 53 | 522 | 0.0025144 | 1462 versican                                                             |
| GO cell adhesion | 53 | 522 | 0.0025144 | 1803 dipeptidyl-peptidase 4                                               |
| GO cell adhesion | 53 | 522 | 0.0025144 | 1901 sphingosine-1-phosphate receptor 1                                   |
| GO cell adhesion | 53 | 522 | 0.0025144 | 2015 egf-like module containing, mucin-like, hormone receptor-like 1      |
| GO cell adhesion | 53 | 522 | 0.0025144 | 2153 coagulation factor V (proaccelerin, labile factor)                   |
| GO cell adhesion | 53 | 522 | 0.0025144 | 22795 nidogen 2 (osteonidogen)                                            |
| GO cell adhesion | 53 | 522 | 0.0025144 | 22915 multimerin 1                                                        |
| GO cell adhesion | 53 | 522 | 0.0025144 | 23145 SCO-spondin homolog (Bos taurus)                                    |
| GO cell adhesion | 53 | 522 | 0.0025144 | 23767 fibronectin leucine rich transmembrane protein 3                    |
| GO cell adhesion | 53 | 522 | 0.0025144 | 255743 nephronectin                                                       |
| GO cell adhesion | 53 | 522 | 0.0025144 | 285704 RGM domain family, member B                                        |
| GO cell adhesion | 53 | 522 | 0.0025144 | 3491 cysteine-rich, angiogenic inducer, 61                                |
| GO cell adhesion | 53 | 522 | 0.0025144 | 3678 integrin, alpha 5 (fibronectin receptor, alpha polypeptide)          |
| GO cell adhesion | 53 | 522 | 0.0025144 | 3687 integrin, alpha X (complement component 3 receptor 4 subunit)        |
| GO cell adhesion | 53 | 522 | 0.0025144 | 3689 integrin, beta 2 (complement component 3 receptor 3 and 4 subunit)   |
| GO cell adhesion | 53 | 522 | 0.0025144 | 3691 integrin, beta 4                                                     |
| GO cell adhesion | 53 | 522 | 0.0025144 | 3696 integrin, beta 8                                                     |
| GO cell adhesion | 53 | 522 | 0.0025144 | 3913 laminin, beta 2 (laminin 5)                                          |
| GO cell adhesion | 53 | 522 | 0.0025144 | 3914 laminin, beta 3                                                      |
| GO cell adhesion | 53 | 522 | 0.0025144 | 3959 lectin, galactoside-binding, soluble, 3 binding protein              |
| GO cell adhesion | 53 | 522 | 0.0025144 | 4254 KIT ligand                                                           |
| GO cell adhesion | 53 | 522 | 0.0025144 | 4586 mucin 5AC, oligomeric mucus/gel-forming                              |
| GO cell adhesion | 53 | 522 | 0.0025144 | 4684 neural cell adhesion molecule 1                                      |
| GO cell adhesion | 53 | 522 | 0.0025144 | 50937 Cdon homolog (mouse)                                                |
| GO cell adhesion | 53 | 522 | 0.0025144 | 5099 protocadherin 7                                                      |
| GO cell adhesion | 53 | 522 | 0.0025144 | 51754 transmembrane protein 8B                                            |
| GO cell adhesion | 53 | 522 | 0.0025144 | 5239 phosphoglucomutase 5                                                 |

|                                          |    |      |           |                                                                             |
|------------------------------------------|----|------|-----------|-----------------------------------------------------------------------------|
| GO cell adhesion                         | 53 | 522  | 0.0025144 | 57453 Down syndrome cell adhesion molecule like 1                           |
| GO cell adhesion                         | 53 | 522  | 0.0025144 | 57863 cell adhesion molecule 3                                              |
| GO cell adhesion                         | 53 | 522  | 0.0025144 | 6402 selectin L                                                             |
| GO cell adhesion                         | 53 | 522  | 0.0025144 | 79987 sushi, von Willebrand factor type A, EGF and pentraxin domain contain |
| GO cell adhesion                         | 53 | 522  | 0.0025144 | 8082 sarcospan (Kras oncogene-associated gene)                              |
| GO cell adhesion                         | 53 | 522  | 0.0025144 | 8406 sushi-repeat-containing protein, X-linked                              |
| GO cell adhesion                         | 53 | 522  | 0.0025144 | 8839 WNT1 inducible signaling pathway protein 2                             |
| GO cell adhesion                         | 53 | 522  | 0.0025144 | 9071 claudin 10                                                             |
| GO cell adhesion                         | 53 | 522  | 0.0025144 | 91653 Boc homolog (mouse)                                                   |
| GO cell adhesion                         | 53 | 522  | 0.0025144 | 94025 mucin 16, cell surface associated                                     |
| GO cell adhesion                         | 53 | 522  | 0.0025144 | 961 CD47 molecule                                                           |
| GO cell adhesion                         | 53 | 522  | 0.0025144 | 9788 metastasis suppressor 1                                                |
| GO scavenger receptor activity           | 9  | 44   | 0.0025403 | 10216 proteoglycan 4                                                        |
| GO scavenger receptor activity           | 9  | 44   | 0.0025403 | 157869 chromosome 8 open reading frame 84                                   |
| GO scavenger receptor activity           | 9  | 44   | 0.0025403 | 1755 deleted in malignant brain tumors 1                                    |
| GO scavenger receptor activity           | 9  | 44   | 0.0025403 | 283316 CD163 molecule-like 1                                                |
| GO scavenger receptor activity           | 9  | 44   | 0.0025403 | 286133 scavenger receptor class A, member 5 (putative)                      |
| GO scavenger receptor activity           | 9  | 44   | 0.0025403 | 3959 lectin, galactoside-binding, soluble, 3 binding protein                |
| GO scavenger receptor activity           | 9  | 44   | 0.0025403 | 56649 transmembrane protease, serine 4                                      |
| GO scavenger receptor activity           | 9  | 44   | 0.0025403 | 64699 transmembrane protease, serine 3                                      |
| GO scavenger receptor activity           | 9  | 44   | 0.0025403 | 84171 lysyl oxidase-like 4                                                  |
| GO negative regulation of nerve growth f | 3  | 5    | 0.0028689 | 10252 sprouty homolog 1, antagonist of FGF signaling (Drosophila)           |
| GO negative regulation of nerve growth f | 3  | 5    | 0.0028689 | 10253 sprouty homolog 2 (Drosophila)                                        |
| GO negative regulation of nerve growth f | 3  | 5    | 0.0028689 | 183 angiotensinogen (serpin peptidase inhibitor, clade A, member 8)         |
| GO insulin binding                       | 3  | 5    | 0.0028689 | 3643 insulin receptor                                                       |
| GO insulin binding                       | 3  | 5    | 0.0028689 | 5122 proprotein convertase subtilisin/kexin type 1                          |
| GO insulin binding                       | 3  | 5    | 0.0028689 | 5295 phosphoinositide-3-kinase, regulatory subunit 1 (alpha)                |
| GO placenta blood vessel development     | 3  | 5    | 0.0028689 | 3696 integrin, beta 8                                                       |
| GO placenta blood vessel development     | 3  | 5    | 0.0028689 | 6692 serine peptidase inhibitor, Kunitz type 1                              |
| GO placenta blood vessel development     | 3  | 5    | 0.0028689 | 9021 suppressor of cytokine signaling 3                                     |
| GO lipopolysaccharide receptor activity  | 3  | 5    | 0.0028689 | 5724 platelet-activating factor receptor                                    |
| GO lipopolysaccharide receptor activity  | 3  | 5    | 0.0028689 | 7097 toll-like receptor 2                                                   |
| GO lipopolysaccharide receptor activity  | 3  | 5    | 0.0028689 | 7099 toll-like receptor 4                                                   |
| GO regulation of transcription, DNA-depe | 92 | 1013 | 0.0030092 | 10346 tripartite motif-containing 22                                        |
| GO regulation of transcription, DNA-depe | 92 | 1013 | 0.0030092 | 10481 homeobox B13                                                          |
| GO regulation of transcription, DNA-depe | 92 | 1013 | 0.0030092 | 10838 zinc finger protein 275                                               |



|    |                                       |    |      |           |                                                                                |
|----|---------------------------------------|----|------|-----------|--------------------------------------------------------------------------------|
| GO | regulation of transcription, DNA-depe | 92 | 1013 | 0.0030092 | 115196 zinc finger protein 554                                                 |
| GO | regulation of transcription, DNA-depe | 92 | 1013 | 0.0030092 | 116071 basic leucine zipper transcription factor, ATF-like 2                   |
| GO | regulation of transcription, DNA-depe | 92 | 1013 | 0.0030092 | 116113 forkhead box P4                                                         |
| GO | regulation of transcription, DNA-depe | 92 | 1013 | 0.0030092 | 127343 diencephalon/mesencephalon homeobox 1                                   |
| GO | regulation of transcription, DNA-depe | 92 | 1013 | 0.0030092 | 1382 cellular retinoic acid binding protein 2                                  |
| GO | regulation of transcription, DNA-depe | 92 | 1013 | 0.0030092 | 147694 zinc finger protein 548                                                 |
| GO | regulation of transcription, DNA-depe | 92 | 1013 | 0.0030092 | 147923 zinc finger protein 420                                                 |
| GO | regulation of transcription, DNA-depe | 92 | 1013 | 0.0030092 | 158800 Rhox homeobox family, member 1                                          |
| GO | regulation of transcription, DNA-depe | 92 | 1013 | 0.0030092 | 162962 zinc finger protein 836                                                 |
| GO | regulation of transcription, DNA-depe | 92 | 1013 | 0.0030092 | 163050 zinc finger protein 564                                                 |
| GO | regulation of transcription, DNA-depe | 92 | 1013 | 0.0030092 | 1820 AT rich interactive domain 3A (BRIGHT-like)                               |
| GO | regulation of transcription, DNA-depe | 92 | 1013 | 0.0030092 | 1959 early growth response 2                                                   |
| GO | regulation of transcription, DNA-depe | 92 | 1013 | 0.0030092 | 1999 E74-like factor 3 (ets domain transcription factor, epithelial-specific ) |
| GO | regulation of transcription, DNA-depe | 92 | 1013 | 0.0030092 | 2115 ets variant 1                                                             |
| GO | regulation of transcription, DNA-depe | 92 | 1013 | 0.0030092 | 2117 ets variant 3                                                             |
| GO | regulation of transcription, DNA-depe | 92 | 1013 | 0.0030092 | 222546 regulatory factor X, 6                                                  |
| GO | regulation of transcription, DNA-depe | 92 | 1013 | 0.0030092 | 2290 forkhead box G1                                                           |
| GO | regulation of transcription, DNA-depe | 92 | 1013 | 0.0030092 | 2296 forkhead box C1                                                           |
| GO | regulation of transcription, DNA-depe | 92 | 1013 | 0.0030092 | 2306 forkhead box D2                                                           |
| GO | regulation of transcription, DNA-depe | 92 | 1013 | 0.0030092 | 2354 FBJ murine osteosarcoma viral oncogene homolog B                          |
| GO | regulation of transcription, DNA-depe | 92 | 1013 | 0.0030092 | 256051 zinc finger protein 549                                                 |
| GO | regulation of transcription, DNA-depe | 92 | 1013 | 0.0030092 | 2624 GATA binding protein 2                                                    |
| GO | regulation of transcription, DNA-depe | 92 | 1013 | 0.0030092 | 26468 LIM homeobox 6                                                           |
| GO | regulation of transcription, DNA-depe | 92 | 1013 | 0.0030092 | 3131 hepatic leukemia factor                                                   |
| GO | regulation of transcription, DNA-depe | 92 | 1013 | 0.0030092 | 3142 H2.0-like homeobox                                                        |
| GO | regulation of transcription, DNA-depe | 92 | 1013 | 0.0030092 | 3164 nuclear receptor subfamily 4, group A, member 1                           |
| GO | regulation of transcription, DNA-depe | 92 | 1013 | 0.0030092 | 3169 forkhead box A1                                                           |
| GO | regulation of transcription, DNA-depe | 92 | 1013 | 0.0030092 | 3175 one cut homeobox 1                                                        |
| GO | regulation of transcription, DNA-depe | 92 | 1013 | 0.0030092 | 3428 interferon, gamma-inducible protein 16                                    |
| GO | regulation of transcription, DNA-depe | 92 | 1013 | 0.0030092 | 342908 zinc finger protein 404                                                 |
| GO | regulation of transcription, DNA-depe | 92 | 1013 | 0.0030092 | 345462 zinc finger protein 879                                                 |
| GO | regulation of transcription, DNA-depe | 92 | 1013 | 0.0030092 | 3665 interferon regulatory factor 7                                            |
| GO | regulation of transcription, DNA-depe | 92 | 1013 | 0.0030092 | 3725 jun oncogene                                                              |
| GO | regulation of transcription, DNA-depe | 92 | 1013 | 0.0030092 | 388536 zinc finger protein 790                                                 |
| GO | regulation of transcription, DNA-depe | 92 | 1013 | 0.0030092 | 388558 zinc finger protein 808                                                 |
| GO | regulation of transcription, DNA-depe | 92 | 1013 | 0.0030092 | 400713 zinc finger protein 880                                                 |

|    |                                       |    |      |           |       |                                                                          |
|----|---------------------------------------|----|------|-----------|-------|--------------------------------------------------------------------------|
| GO | regulation of transcription, DNA-depe | 92 | 1013 | 0.0030092 | 4209  | myocyte enhancer factor 2D                                               |
| GO | regulation of transcription, DNA-depe | 92 | 1013 | 0.0030092 | 4212  | Meis homeobox 2                                                          |
| GO | regulation of transcription, DNA-depe | 92 | 1013 | 0.0030092 | 4223  | mesenchyme homeobox 2                                                    |
| GO | regulation of transcription, DNA-depe | 92 | 1013 | 0.0030092 | 4286  | microphthalmia-associated transcription factor                           |
| GO | regulation of transcription, DNA-depe | 92 | 1013 | 0.0030092 | 4306  | nuclear receptor subfamily 3, group C, member 2                          |
| GO | regulation of transcription, DNA-depe | 92 | 1013 | 0.0030092 | 467   | activating transcription factor 3                                        |
| GO | regulation of transcription, DNA-depe | 92 | 1013 | 0.0030092 | 4692  | necdin homolog (mouse)                                                   |
| GO | regulation of transcription, DNA-depe | 92 | 1013 | 0.0030092 | 4783  | nuclear factor, interleukin 3 regulated                                  |
| GO | regulation of transcription, DNA-depe | 92 | 1013 | 0.0030092 | 4784  | nuclear factor I/X (CCAAT-binding transcription factor)                  |
| GO | regulation of transcription, DNA-depe | 92 | 1013 | 0.0030092 | 4791  | nuclear factor of kappa light polypeptide gene enhancer in B-cells 2 (p4 |
| GO | regulation of transcription, DNA-depe | 92 | 1013 | 0.0030092 | 4802  | nuclear transcription factor Y, gamma                                    |
| GO | regulation of transcription, DNA-depe | 92 | 1013 | 0.0030092 | 4853  | Notch homolog 2 (Drosophila)                                             |
| GO | regulation of transcription, DNA-depe | 92 | 1013 | 0.0030092 | 4929  | nuclear receptor subfamily 4, group A, member 2                          |
| GO | regulation of transcription, DNA-depe | 92 | 1013 | 0.0030092 | 5083  | paired box 9                                                             |
| GO | regulation of transcription, DNA-depe | 92 | 1013 | 0.0030092 | 51085 | MLX interacting protein-like                                             |
| GO | regulation of transcription, DNA-depe | 92 | 1013 | 0.0030092 | 51710 | zinc finger protein 44                                                   |
| GO | regulation of transcription, DNA-depe | 92 | 1013 | 0.0030092 | 5187  | period homolog 1 (Drosophila)                                            |
| GO | regulation of transcription, DNA-depe | 92 | 1013 | 0.0030092 | 5307  | paired-like homeodomain 1                                                |
| GO | regulation of transcription, DNA-depe | 92 | 1013 | 0.0030092 | 5308  | paired-like homeodomain 2                                                |
| GO | regulation of transcription, DNA-depe | 92 | 1013 | 0.0030092 | 5396  | paired related homeobox 1                                                |
| GO | regulation of transcription, DNA-depe | 92 | 1013 | 0.0030092 | 5460  | POU class 5 homeobox 1                                                   |
| GO | regulation of transcription, DNA-depe | 92 | 1013 | 0.0030092 | 5463  | POU class 6 homeobox 1                                                   |
| GO | regulation of transcription, DNA-depe | 92 | 1013 | 0.0030092 | 5465  | peroxisome proliferator-activated receptor alpha                         |
| GO | regulation of transcription, DNA-depe | 92 | 1013 | 0.0030092 | 55762 | zinc finger protein 701                                                  |
| GO | regulation of transcription, DNA-depe | 92 | 1013 | 0.0030092 | 55769 | zinc finger protein 83                                                   |
| GO | regulation of transcription, DNA-depe | 92 | 1013 | 0.0030092 | 55810 | forkhead box J2                                                          |
| GO | regulation of transcription, DNA-depe | 92 | 1013 | 0.0030092 | 55893 | zinc finger protein 395                                                  |
| GO | regulation of transcription, DNA-depe | 92 | 1013 | 0.0030092 | 57459 | GATA zinc finger domain containing 2B                                    |
| GO | regulation of transcription, DNA-depe | 92 | 1013 | 0.0030092 | 57594 | homeobox and leucine zipper encoding                                     |
| GO | regulation of transcription, DNA-depe | 92 | 1013 | 0.0030092 | 6096  | RAR-related orphan receptor B                                            |
| GO | regulation of transcription, DNA-depe | 92 | 1013 | 0.0030092 | 6097  | RAR-related orphan receptor C                                            |
| GO | regulation of transcription, DNA-depe | 92 | 1013 | 0.0030092 | 6239  | ras responsive element binding protein 1                                 |
| GO | regulation of transcription, DNA-depe | 92 | 1013 | 0.0030092 | 64651 | cysteine-serine-rich nuclear protein 1                                   |
| GO | regulation of transcription, DNA-depe | 92 | 1013 | 0.0030092 | 7090  | transducin-like enhancer of split 3 (E(sp1) homolog, Drosophila)         |
| GO | regulation of transcription, DNA-depe | 92 | 1013 | 0.0030092 | 7565  | zinc finger protein 17                                                   |
| GO | regulation of transcription, DNA-depe | 92 | 1013 | 0.0030092 | 7678  | zinc finger protein 124                                                  |

|    |                                       |    |      |           |                                                                                |
|----|---------------------------------------|----|------|-----------|--------------------------------------------------------------------------------|
| GO | regulation of transcription, DNA-depe | 92 | 1013 | 0.0030092 | 8013 nuclear receptor subfamily 4, group A, member 3                           |
| GO | regulation of transcription, DNA-depe | 92 | 1013 | 0.0030092 | 80714 pre-B-cell leukemia homeobox 4                                           |
| GO | regulation of transcription, DNA-depe | 92 | 1013 | 0.0030092 | 84124 zinc finger protein 394                                                  |
| GO | regulation of transcription, DNA-depe | 92 | 1013 | 0.0030092 | 84911 zinc finger protein 382                                                  |
| GO | regulation of transcription, DNA-depe | 92 | 1013 | 0.0030092 | 8531 cold shock domain protein A                                               |
| GO | regulation of transcription, DNA-depe | 92 | 1013 | 0.0030092 | 8553 basic helix-loop-helix family, member e40                                 |
| GO | regulation of transcription, DNA-depe | 92 | 1013 | 0.0030092 | 862 runt-related transcription factor 1; translocated to, 1 (cyclin D-related) |
| GO | regulation of transcription, DNA-depe | 92 | 1013 | 0.0030092 | 8622 phosphodiesterase 8B                                                      |
| GO | regulation of transcription, DNA-depe | 92 | 1013 | 0.0030092 | 8848 TSC22 domain family, member 1                                             |
| GO | regulation of transcription, DNA-depe | 92 | 1013 | 0.0030092 | 8863 period homolog 3 (Drosophila)                                             |
| GO | regulation of transcription, DNA-depe | 92 | 1013 | 0.0030092 | 8864 period homolog 2 (Drosophila)                                             |
| GO | regulation of transcription, DNA-depe | 92 | 1013 | 0.0030092 | 90592 zinc finger protein 700                                                  |
| GO | regulation of transcription, DNA-depe | 92 | 1013 | 0.0030092 | 90993 cAMP responsive element binding protein 3-like 1                         |
| GO | regulation of transcription, DNA-depe | 92 | 1013 | 0.0030092 | 92283 zinc finger protein 461                                                  |
| GO | regulation of transcription, DNA-depe | 92 | 1013 | 0.0030092 | 9422 zinc finger protein 264                                                   |
| GO | regulation of transcription, DNA-depe | 92 | 1013 | 0.0030092 | 9496 T-box 4                                                                   |
| GO | regulation of transcription, DNA-depe | 92 | 1013 | 0.0030092 | 9572 nuclear receptor subfamily 1, group D, member 1                           |
| GO | response to drug                      | 27 | 225  | 0.0031121 | 10628 thioredoxin interacting protein                                          |
| GO | response to drug                      | 27 | 225  | 0.0031121 | 1080 cystic fibrosis transmembrane conductance regulator (ATP-binding cas:     |
| GO | response to drug                      | 27 | 225  | 0.0031121 | 123 perilipin 2                                                                |
| GO | response to drug                      | 27 | 225  | 0.0031121 | 1373 carbamoyl-phosphate synthetase 1, mitochondrial                           |
| GO | response to drug                      | 27 | 225  | 0.0031121 | 1813 dopamine receptor D2                                                      |
| GO | response to drug                      | 27 | 225  | 0.0031121 | 2026 enolase 2 (gamma, neuronal)                                               |
| GO | response to drug                      | 27 | 225  | 0.0031121 | 2033 E1A binding protein p300                                                  |
| GO | response to drug                      | 27 | 225  | 0.0031121 | 2066 v-erb-a erythroblastic leukemia viral oncogene homolog 4 (avian)          |
| GO | response to drug                      | 27 | 225  | 0.0031121 | 2353 FBJ murine osteosarcoma viral oncogene homolog                            |
| GO | response to drug                      | 27 | 225  | 0.0031121 | 2564 gamma-aminobutyric acid (GABA) A receptor, epsilon                        |
| GO | response to drug                      | 27 | 225  | 0.0031121 | 358 aquaporin 1 (Colton blood group)                                           |
| GO | response to drug                      | 27 | 225  | 0.0031121 | 368 ATP-binding cassette, sub-family C (CFTR/MRP), member 6                    |
| GO | response to drug                      | 27 | 225  | 0.0031121 | 3725 jun oncogene                                                              |
| GO | response to drug                      | 27 | 225  | 0.0031121 | 3726 jun B proto-oncogene                                                      |
| GO | response to drug                      | 27 | 225  | 0.0031121 | 4015 lysyl oxidase                                                             |
| GO | response to drug                      | 27 | 225  | 0.0031121 | 4056 leukotriene C4 synthase                                                   |
| GO | response to drug                      | 27 | 225  | 0.0031121 | 4129 monoamine oxidase B                                                       |
| GO | response to drug                      | 27 | 225  | 0.0031121 | 5122 proprotein convertase subtilisin/kexin type 1                             |
| GO | response to drug                      | 27 | 225  | 0.0031121 | 5243 ATP-binding cassette, sub-family B (MDR/TAP), member 1                    |

|                                            |    |     |           |                                                                              |
|--------------------------------------------|----|-----|-----------|------------------------------------------------------------------------------|
| GO response to drug                        | 27 | 225 | 0.0031121 | 5244 ATP-binding cassette, sub-family B (MDR/TAP), member 4                  |
| GO response to drug                        | 27 | 225 | 0.0031121 | 5608 mitogen-activated protein kinase kinase 6                               |
| GO response to drug                        | 27 | 225 | 0.0031121 | 5972 renin                                                                   |
| GO response to drug                        | 27 | 225 | 0.0031121 | 627 brain-derived neurotrophic factor                                        |
| GO response to drug                        | 27 | 225 | 0.0031121 | 6622 synuclein, alpha (non A4 component of amyloid precursor)                |
| GO response to drug                        | 27 | 225 | 0.0031121 | 6750 somatostatin                                                            |
| GO response to drug                        | 27 | 225 | 0.0031121 | 834 caspase 1, apoptosis-related cysteine peptidase (interleukin 1, beta, co |
| GO response to drug                        | 27 | 225 | 0.0031121 | 9021 suppressor of cytokine signaling 3                                      |
| GO positive regulation of Ras protein sigl | 4  | 10  | 0.0032664 | 1435 colony stimulating factor 1 (macrophage)                                |
| GO positive regulation of Ras protein sigl | 4  | 10  | 0.0032664 | 3479 insulin-like growth factor 1 (somatomedin C)                            |
| GO positive regulation of Ras protein sigl | 4  | 10  | 0.0032664 | 4254 KIT ligand                                                              |
| GO positive regulation of Ras protein sigl | 4  | 10  | 0.0032664 | 4853 Notch homolog 2 (Drosophila)                                            |
| GO receptor signaling protein tyrosine ki  | 4  | 10  | 0.0032664 | 2066 v-erb-a erythroblastic leukemia viral oncogene homolog 4 (avian)        |
| GO receptor signaling protein tyrosine ki  | 4  | 10  | 0.0032664 | 3643 insulin receptor                                                        |
| GO receptor signaling protein tyrosine ki  | 4  | 10  | 0.0032664 | 3815 v-kit Hardy-Zuckerman 4 feline sarcoma viral oncogene homolog           |
| GO receptor signaling protein tyrosine ki  | 4  | 10  | 0.0032664 | 6850 spleen tyrosine kinase                                                  |
| GO positive regulation of tyrosine phospl  | 4  | 10  | 0.0032664 | 23529 cardiotrophin-like cytokine factor 1                                   |
| GO positive regulation of tyrosine phospl  | 4  | 10  | 0.0032664 | 3569 interleukin 6 (interferon, beta 2)                                      |
| GO positive regulation of tyrosine phospl  | 4  | 10  | 0.0032664 | 3570 interleukin 6 receptor                                                  |
| GO positive regulation of tyrosine phospl  | 4  | 10  | 0.0032664 | 50604 interleukin 20                                                         |
| GO positive regulation of interleukin-8 pr | 4  | 10  | 0.0032664 | 7097 toll-like receptor 2                                                    |
| GO positive regulation of interleukin-8 pr | 4  | 10  | 0.0032664 | 7098 toll-like receptor 3                                                    |
| GO positive regulation of interleukin-8 pr | 4  | 10  | 0.0032664 | 7099 toll-like receptor 4                                                    |
| GO positive regulation of interleukin-8 pr | 4  | 10  | 0.0032664 | 7100 toll-like receptor 5                                                    |
| GO response to cAMP                        | 9  | 46  | 0.0034918 | 1373 carbamoyl-phosphate synthetase 1, mitochondrial                         |
| GO response to cAMP                        | 9  | 46  | 0.0034918 | 1843 dual specificity phosphatase 1                                          |
| GO response to cAMP                        | 9  | 46  | 0.0034918 | 2353 FBJ murine osteosarcoma viral oncogene homolog                          |
| GO response to cAMP                        | 9  | 46  | 0.0034918 | 3570 interleukin 6 receptor                                                  |
| GO response to cAMP                        | 9  | 46  | 0.0034918 | 3725 jun oncogene                                                            |
| GO response to cAMP                        | 9  | 46  | 0.0034918 | 3726 jun B proto-oncogene                                                    |
| GO response to cAMP                        | 9  | 46  | 0.0034918 | 5327 plasminogen activator, tissue                                           |
| GO response to cAMP                        | 9  | 46  | 0.0034918 | 5972 renin                                                                   |
| GO response to cAMP                        | 9  | 46  | 0.0034918 | 682 basigin (Ok blood group)                                                 |
| GO potassium channel regulator activity    | 6  | 23  | 0.0037057 | 10008 potassium voltage-gated channel, Isk-related family, member 3          |
| GO potassium channel regulator activity    | 6  | 23  | 0.0037057 | 154 adrenergic, beta-2-, receptor, surface                                   |
| GO potassium channel regulator activity    | 6  | 23  | 0.0037057 | 1813 dopamine receptor D2                                                    |

|                                         |    |     |           |                                                                                |
|-----------------------------------------|----|-----|-----------|--------------------------------------------------------------------------------|
| GO potassium channel regulator activity | 6  | 23  | 0.0037057 | 1815 dopamine receptor D4                                                      |
| GO potassium channel regulator activity | 6  | 23  | 0.0037057 | 3790 potassium voltage-gated channel, delayed-rectifier, subfamily S, memb     |
| GO potassium channel regulator activity | 6  | 23  | 0.0037057 | 8514 potassium voltage-gated channel, shaker-related subfamily, beta mem       |
| GO odontogenesis                        | 6  | 23  | 0.0037057 | 10117 enamelin                                                                 |
| GO odontogenesis                        | 6  | 23  | 0.0037057 | 1435 colony stimulating factor 1 (macrophage)                                  |
| GO odontogenesis                        | 6  | 23  | 0.0037057 | 2066 v-erb-a erythroblastic leukemia viral oncogene homolog 4 (avian)          |
| GO odontogenesis                        | 6  | 23  | 0.0037057 | 2331 fibromodulin                                                              |
| GO odontogenesis                        | 6  | 23  | 0.0037057 | 358 aquaporin 1 (Colton blood group)                                           |
| GO odontogenesis                        | 6  | 23  | 0.0037057 | 652 bone morphogenetic protein 4                                               |
| GO regulation of cell proliferation     | 12 | 73  | 0.0037325 | 10628 thioredoxin interacting protein                                          |
| GO regulation of cell proliferation     | 12 | 73  | 0.0037325 | 1628 D site of albumin promoter (albumin D-box) binding protein                |
| GO regulation of cell proliferation     | 12 | 73  | 0.0037325 | 183 angiotensinogen (serpin peptidase inhibitor, clade A, member 8)            |
| GO regulation of cell proliferation     | 12 | 73  | 0.0037325 | 3911 laminin, alpha 5                                                          |
| GO regulation of cell proliferation     | 12 | 73  | 0.0037325 | 4286 microphthalmia-associated transcription factor                            |
| GO regulation of cell proliferation     | 12 | 73  | 0.0037325 | 4316 matrix metalloproteinase 7 (matrilysin, uterine)                          |
| GO regulation of cell proliferation     | 12 | 73  | 0.0037325 | 4792 nuclear factor of kappa light polypeptide gene enhancer in B-cells inhib  |
| GO regulation of cell proliferation     | 12 | 73  | 0.0037325 | 5732 prostaglandin E receptor 2 (subtype EP2), 53kDa                           |
| GO regulation of cell proliferation     | 12 | 73  | 0.0037325 | 5742 prostaglandin-endoperoxide synthase 1 (prostaglandin G/H synthase a       |
| GO regulation of cell proliferation     | 12 | 73  | 0.0037325 | 6778 signal transducer and activator of transcription 6, interleukin-4 inducec |
| GO regulation of cell proliferation     | 12 | 73  | 0.0037325 | 8744 tumor necrosis factor (ligand) superfamily, member 9                      |
| GO regulation of cell proliferation     | 12 | 73  | 0.0037325 | 92304 secretoglobulin, family 3A, member 1                                     |
| GO response to organic cyclic substance | 14 | 92  | 0.0037721 | 123 perilipin 2                                                                |
| GO response to organic cyclic substance | 14 | 92  | 0.0037721 | 1508 cathepsin B                                                               |
| GO response to organic cyclic substance | 14 | 92  | 0.0037721 | 2026 enolase 2 (gamma, neuronal)                                               |
| GO response to organic cyclic substance | 14 | 92  | 0.0037721 | 2033 E1A binding protein p300                                                  |
| GO response to organic cyclic substance | 14 | 92  | 0.0037721 | 205 adenylate kinase 3-like 1                                                  |
| GO response to organic cyclic substance | 14 | 92  | 0.0037721 | 2353 FBJ murine osteosarcoma viral oncogene homolog                            |
| GO response to organic cyclic substance | 14 | 92  | 0.0037721 | 3725 jun oncogene                                                              |
| GO response to organic cyclic substance | 14 | 92  | 0.0037721 | 3726 jun B proto-oncogene                                                      |
| GO response to organic cyclic substance | 14 | 92  | 0.0037721 | 412 steroid sulfatase (microsomal), isozyme S                                  |
| GO response to organic cyclic substance | 14 | 92  | 0.0037721 | 5122 proprotein convertase subtilisin/kexin type 1                             |
| GO response to organic cyclic substance | 14 | 92  | 0.0037721 | 6256 retinoid X receptor, alpha                                                |
| GO response to organic cyclic substance | 14 | 92  | 0.0037721 | 652 bone morphogenetic protein 4                                               |
| GO response to organic cyclic substance | 14 | 92  | 0.0037721 | 834 caspase 1, apoptosis-related cysteine peptidase (interleukin 1, beta, co   |
| GO response to organic cyclic substance | 14 | 92  | 0.0037721 | 9021 suppressor of cytokine signaling 3                                        |
| GO membrane raft                        | 15 | 103 | 0.0042491 | 112 adenylate cyclase 6                                                        |

|                                            |    |     |           |                                                                           |
|--------------------------------------------|----|-----|-----------|---------------------------------------------------------------------------|
| GO membrane raft                           | 15 | 103 | 0.0042491 | 1604 CD55 molecule, decay accelerating factor for complement (Cromer blo  |
| GO membrane raft                           | 15 | 103 | 0.0042491 | 1803 dipeptidyl-peptidase 4                                               |
| GO membrane raft                           | 15 | 103 | 0.0042491 | 2040 stomatin                                                             |
| GO membrane raft                           | 15 | 103 | 0.0042491 | 285704 RGM domain family, member B                                        |
| GO membrane raft                           | 15 | 103 | 0.0042491 | 3845 v-Ki-ras2 Kirsten rat sarcoma viral oncogene homolog                 |
| GO membrane raft                           | 15 | 103 | 0.0042491 | 55600 intelectin 1 (galactofuranose binding)                              |
| GO membrane raft                           | 15 | 103 | 0.0042491 | 5577 protein kinase, cAMP-dependent, regulatory, type II, beta            |
| GO membrane raft                           | 15 | 103 | 0.0042491 | 55824 phosphoprotein associated with glycosphingolipid microdomains 1     |
| GO membrane raft                           | 15 | 103 | 0.0042491 | 6004 regulator of G-protein signaling 16                                  |
| GO membrane raft                           | 15 | 103 | 0.0042491 | 682 basigin (Ok blood group)                                              |
| GO membrane raft                           | 15 | 103 | 0.0042491 | 7099 toll-like receptor 4                                                 |
| GO membrane raft                           | 15 | 103 | 0.0042491 | 7133 tumor necrosis factor receptor superfamily, member 1B                |
| GO membrane raft                           | 15 | 103 | 0.0042491 | 79180 EF-hand domain family, member D2                                    |
| GO membrane raft                           | 15 | 103 | 0.0042491 | 929 CD14 molecule                                                         |
| GO regulation of long-term neuronal syn    | 5  | 17  | 0.004577  | 1813 dopamine receptor D2                                                 |
| GO regulation of long-term neuronal syn    | 5  | 17  | 0.004577  | 183 angiotensinogen (serpin peptidase inhibitor, clade A, member 8)       |
| GO regulation of long-term neuronal syn    | 5  | 17  | 0.004577  | 1958 early growth response 1                                              |
| GO regulation of long-term neuronal syn    | 5  | 17  | 0.004577  | 3845 v-Ki-ras2 Kirsten rat sarcoma viral oncogene homolog                 |
| GO regulation of long-term neuronal syn    | 5  | 17  | 0.004577  | 6622 synuclein, alpha (non A4 component of amyloid precursor)             |
| GO negative regulation of Ras GTPase ac    | 2  | 2   | 0.0046681 | 10252 sprouty homolog 1, antagonist of FGF signaling (Drosophila)         |
| GO negative regulation of Ras GTPase ac    | 2  | 2   | 0.0046681 | 10253 sprouty homolog 2 (Drosophila)                                      |
| GO bud elongation involved in lung bran    | 2  | 2   | 0.0046681 | 157506 retinol dehydrogenase 10 (all-trans)                               |
| GO bud elongation involved in lung bran    | 2  | 2   | 0.0046681 | 652 bone morphogenetic protein 4                                          |
| GO blood vessel endothelial cell prolifera | 2  | 2   | 0.0046681 | 168667 BMP binding endothelial regulator                                  |
| GO blood vessel endothelial cell prolifera | 2  | 2   | 0.0046681 | 652 bone morphogenetic protein 4                                          |
| GO positive regulation of dopamine upta    | 2  | 2   | 0.0046681 | 1813 dopamine receptor D2                                                 |
| GO positive regulation of dopamine upta    | 2  | 2   | 0.0046681 | 1815 dopamine receptor D4                                                 |
| GO establishment of blood-nerve barrier    | 2  | 2   | 0.0046681 | 183 angiotensinogen (serpin peptidase inhibitor, clade A, member 8)       |
| GO establishment of blood-nerve barrier    | 2  | 2   | 0.0046681 | 2947 glutathione S-transferase mu 3 (brain)                               |
| GO lymph vessel development                | 2  | 2   | 0.0046681 | 1948 ephrin-B2                                                            |
| GO lymph vessel development                | 2  | 2   | 0.0046681 | 2296 forkhead box C1                                                      |
| GO positive regulation of glycoprotein bi  | 2  | 2   | 0.0046681 | 2033 E1A binding protein p300                                             |
| GO positive regulation of glycoprotein bi  | 2  | 2   | 0.0046681 | 3643 insulin receptor                                                     |
| GO positive regulation of interleukin-3 bi | 2  | 2   | 0.0046681 | 2205 Fc fragment of IgE, high affinity I, receptor for; alpha polypeptide |
| GO positive regulation of interleukin-3 bi | 2  | 2   | 0.0046681 | 6850 spleen tyrosine kinase                                               |
| GO serotonin secretion                     | 2  | 2   | 0.0046681 | 2205 Fc fragment of IgE, high affinity I, receptor for; alpha polypeptide |

|    |                                       |    |     |           |                                                                               |
|----|---------------------------------------|----|-----|-----------|-------------------------------------------------------------------------------|
| GO | serotonin secretion                   | 2  | 2   | 0.0046681 | 6850 spleen tyrosine kinase                                                   |
| GO | Ral guanyl-nucleotide exchange factc  | 2  | 2   | 0.0046681 | 23179 ral guanine nucleotide dissociation stimulator-like 1                   |
| GO | Ral guanyl-nucleotide exchange factc  | 2  | 2   | 0.0046681 | 57139 ral guanine nucleotide dissociation stimulator-like 3                   |
| GO | regulation of low-density lipoprotein | 2  | 2   | 0.0046681 | 255738 proprotein convertase subtilisin/kexin type 9                          |
| GO | regulation of low-density lipoprotein | 2  | 2   | 0.0046681 | 29116 myosin regulatory light chain interacting protein                       |
| GO | prostate gland stromal morphogenes    | 2  | 2   | 0.0046681 | 3169 forkhead box A1                                                          |
| GO | prostate gland stromal morphogenes    | 2  | 2   | 0.0046681 | 3479 insulin-like growth factor 1 (somatomedin C)                             |
| GO | hepatic immune response               | 2  | 2   | 0.0046681 | 3569 interleukin 6 (interferon, beta 2)                                       |
| GO | hepatic immune response               | 2  | 2   | 0.0046681 | 3570 interleukin 6 receptor                                                   |
| GO | response to iron(II) ion              | 2  | 2   | 0.0046681 | 48 aconitase 1, soluble                                                       |
| GO | response to iron(II) ion              | 2  | 2   | 0.0046681 | 6622 synuclein, alpha (non A4 component of amyloid precursor)                 |
| GO | axon target recognition               | 2  | 2   | 0.0046681 | 627 brain-derived neurotrophic factor                                         |
| GO | axon target recognition               | 2  | 2   | 0.0046681 | 6812 syntaxin binding protein 1                                               |
| GO | RNA destabilization                   | 2  | 2   | 0.0046681 | 7133 tumor necrosis factor receptor superfamily, member 1B                    |
| GO | RNA destabilization                   | 2  | 2   | 0.0046681 | 7538 zinc finger protein 36, C3H type, homolog (mouse)                        |
| GO | response to exogenous dsRNA           | 4  | 11  | 0.0048571 | 11213 interleukin-1 receptor-associated kinase 3                              |
| GO | response to exogenous dsRNA           | 4  | 11  | 0.0048571 | 4792 nuclear factor of kappa light polypeptide gene enhancer in B-cells inhib |
| GO | response to exogenous dsRNA           | 4  | 11  | 0.0048571 | 64127 nucleotide-binding oligomerization domain containing 2                  |
| GO | response to exogenous dsRNA           | 4  | 11  | 0.0048571 | 7098 toll-like receptor 3                                                     |
| GO | neural crest cell development         | 4  | 11  | 0.0048571 | 157506 retinol dehydrogenase 10 (all-trans)                                   |
| GO | neural crest cell development         | 4  | 11  | 0.0048571 | 1906 endothelin 1                                                             |
| GO | neural crest cell development         | 4  | 11  | 0.0048571 | 2296 forkhead box C1                                                          |
| GO | neural crest cell development         | 4  | 11  | 0.0048571 | 2303 forkhead box C2 (MFH-1, mesenchyme forkhead 1)                           |
| GO | cell fate determination               | 4  | 11  | 0.0048571 | 2624 GATA binding protein 2                                                   |
| GO | cell fate determination               | 4  | 11  | 0.0048571 | 4170 myeloid cell leukemia sequence 1 (BCL2-related)                          |
| GO | cell fate determination               | 4  | 11  | 0.0048571 | 4853 Notch homolog 2 (Drosophila)                                             |
| GO | cell fate determination               | 4  | 11  | 0.0048571 | 57453 Down syndrome cell adhesion molecule like 1                             |
| GO | myoblast fusion                       | 4  | 11  | 0.0048571 | 4842 nitric oxide synthase 1 (neuronal)                                       |
| GO | myoblast fusion                       | 4  | 11  | 0.0048571 | 50937 Cdon homolog (mouse)                                                    |
| GO | myoblast fusion                       | 4  | 11  | 0.0048571 | 834 caspase 1, apoptosis-related cysteine peptidase (interleukin 1, beta, co  |
| GO | myoblast fusion                       | 4  | 11  | 0.0048571 | 8912 calcium channel, voltage-dependent, T type, alpha 1H subunit             |
| GO | proteinaceous extracellular matrix    | 26 | 223 | 0.0053803 | 10117 enamelin                                                                |
| GO | proteinaceous extracellular matrix    | 26 | 223 | 0.0053803 | 10417 spondin 2, extracellular matrix protein                                 |
| GO | proteinaceous extracellular matrix    | 26 | 223 | 0.0053803 | 10418 spondin 1, extracellular matrix protein                                 |
| GO | proteinaceous extracellular matrix    | 26 | 223 | 0.0053803 | 10516 fibulin 5                                                               |
| GO | proteinaceous extracellular matrix    | 26 | 223 | 0.0053803 | 10752 cell adhesion molecule with homology to L1CAM (close homolog of L1)     |

|    |                                     |    |     |           |        |                                                                        |
|----|-------------------------------------|----|-----|-----------|--------|------------------------------------------------------------------------|
| GO | proteinaceous extracellular matrix  | 26 | 223 | 0.0053803 | 126638 | repetin                                                                |
| GO | proteinaceous extracellular matrix  | 26 | 223 | 0.0053803 | 1462   | versican                                                               |
| GO | proteinaceous extracellular matrix  | 26 | 223 | 0.0053803 | 170692 | ADAM metallopeptidase with thrombospondin type 1 motif, 18             |
| GO | proteinaceous extracellular matrix  | 26 | 223 | 0.0053803 | 2200   | fibrillin 1                                                            |
| GO | proteinaceous extracellular matrix  | 26 | 223 | 0.0053803 | 2201   | fibrillin 2                                                            |
| GO | proteinaceous extracellular matrix  | 26 | 223 | 0.0053803 | 2239   | glypican 4                                                             |
| GO | proteinaceous extracellular matrix  | 26 | 223 | 0.0053803 | 2262   | glypican 5                                                             |
| GO | proteinaceous extracellular matrix  | 26 | 223 | 0.0053803 | 2331   | fibromodulin                                                           |
| GO | proteinaceous extracellular matrix  | 26 | 223 | 0.0053803 | 23767  | fibronectin leucine rich transmembrane protein 3                       |
| GO | proteinaceous extracellular matrix  | 26 | 223 | 0.0053803 | 255743 | nephronectin                                                           |
| GO | proteinaceous extracellular matrix  | 26 | 223 | 0.0053803 | 3958   | lectin, galactoside-binding, soluble, 3                                |
| GO | proteinaceous extracellular matrix  | 26 | 223 | 0.0053803 | 3959   | lectin, galactoside-binding, soluble, 3 binding protein                |
| GO | proteinaceous extracellular matrix  | 26 | 223 | 0.0053803 | 4316   | matrix metallopeptidase 7 (matrilysin, uterine)                        |
| GO | proteinaceous extracellular matrix  | 26 | 223 | 0.0053803 | 50859  | sparc/osteonectin, cwcv and kazal-like domains proteoglycan (testican) |
| GO | proteinaceous extracellular matrix  | 26 | 223 | 0.0053803 | 54361  | wingless-type MMTV integration site family, member 4                   |
| GO | proteinaceous extracellular matrix  | 26 | 223 | 0.0053803 | 56547  | matrix metallopeptidase 26                                             |
| GO | proteinaceous extracellular matrix  | 26 | 223 | 0.0053803 | 652    | bone morphogenetic protein 4                                           |
| GO | proteinaceous extracellular matrix  | 26 | 223 | 0.0053803 | 7076   | TIMP metallopeptidase inhibitor 1                                      |
| GO | proteinaceous extracellular matrix  | 26 | 223 | 0.0053803 | 7474   | wingless-type MMTV integration site family, member 5A                  |
| GO | proteinaceous extracellular matrix  | 26 | 223 | 0.0053803 | 7477   | wingless-type MMTV integration site family, member 7B                  |
| GO | proteinaceous extracellular matrix  | 26 | 223 | 0.0053803 | 8076   | microfibrillar associated protein 5                                    |
| GO | regulation of blood pressure        | 9  | 49  | 0.005419  | 183    | angiotensinogen (serpin peptidase inhibitor, clade A, member 8)        |
| GO | regulation of blood pressure        | 9  | 49  | 0.005419  | 1906   | endothelin 1                                                           |
| GO | regulation of blood pressure        | 9  | 49  | 0.005419  | 2642   | glucagon receptor                                                      |
| GO | regulation of blood pressure        | 9  | 49  | 0.005419  | 27035  | NADPH oxidase 1                                                        |
| GO | regulation of blood pressure        | 9  | 49  | 0.005419  | 4886   | neuropeptide Y receptor Y1                                             |
| GO | regulation of blood pressure        | 9  | 49  | 0.005419  | 5025   | purinergic receptor P2X, ligand-gated ion channel, 4                   |
| GO | regulation of blood pressure        | 9  | 49  | 0.005419  | 5742   | prostaglandin-endoperoxide synthase 1 (prostaglandin G/H synthase and  |
| GO | regulation of blood pressure        | 9  | 49  | 0.005419  | 5972   | renin                                                                  |
| GO | regulation of blood pressure        | 9  | 49  | 0.005419  | 94     | activin A receptor type II-like 1                                      |
| GO | regulation of hydrogen peroxide met | 3  | 6   | 0.0054465 | 10811  | NADPH oxidase activator 1                                              |
| GO | regulation of hydrogen peroxide met | 3  | 6   | 0.0054465 | 3643   | insulin receptor                                                       |
| GO | regulation of hydrogen peroxide met | 3  | 6   | 0.0054465 | 7001   | peroxiredoxin 2                                                        |
| GO | response to peptidoglycan           | 3  | 6   | 0.0054465 | 11213  | interleukin-1 receptor-associated kinase 3                             |
| GO | response to peptidoglycan           | 3  | 6   | 0.0054465 | 3569   | interleukin 6 (interferon, beta 2)                                     |
| GO | response to peptidoglycan           | 3  | 6   | 0.0054465 | 7097   | toll-like receptor 2                                                   |



|                                         |     |      |           |                                                                           |
|-----------------------------------------|-----|------|-----------|---------------------------------------------------------------------------|
| GO positive regulation of organ growth  | 3   | 6    | 0.0054465 | 183 angiotensinogen (serpin peptidase inhibitor, clade A, member 8)       |
| GO positive regulation of organ growth  | 3   | 6    | 0.0054465 | 3142 H2.0-like homeobox                                                   |
| GO positive regulation of organ growth  | 3   | 6    | 0.0054465 | 8531 cold shock domain protein A                                          |
| GO chromatin DNA binding                | 3   | 6    | 0.0054465 | 2303 forkhead box C2 (MFH-1, mesenchyme forkhead 1)                       |
| GO chromatin DNA binding                | 3   | 6    | 0.0054465 | 4851 Notch homolog 1, translocation-associated (Drosophila)               |
| GO chromatin DNA binding                | 3   | 6    | 0.0054465 | 604 B-cell CLL/lymphoma 6                                                 |
| GO insulin-like growth factor I binding | 3   | 6    | 0.0054465 | 3486 insulin-like growth factor binding protein 3                         |
| GO insulin-like growth factor I binding | 3   | 6    | 0.0054465 | 3488 insulin-like growth factor binding protein 5                         |
| GO insulin-like growth factor I binding | 3   | 6    | 0.0054465 | 3643 insulin receptor                                                     |
| GO lipid binding                        | 16  | 116  | 0.0055177 | 1382 cellular retinoic acid binding protein 2                             |
| GO lipid binding                        | 16  | 116  | 0.0055177 | 23048 formin binding protein 1                                            |
| GO lipid binding                        | 16  | 116  | 0.0055177 | 23780 apolipoprotein L, 2                                                 |
| GO lipid binding                        | 16  | 116  | 0.0055177 | 2865 free fatty acid receptor 3                                           |
| GO lipid binding                        | 16  | 116  | 0.0055177 | 2867 free fatty acid receptor 2                                           |
| GO lipid binding                        | 16  | 116  | 0.0055177 | 4056 leukotriene C4 synthase                                              |
| GO lipid binding                        | 16  | 116  | 0.0055177 | 51228 glycolipid transfer protein                                         |
| GO lipid binding                        | 16  | 116  | 0.0055177 | 5346 perilipin 1                                                          |
| GO lipid binding                        | 16  | 116  | 0.0055177 | 5465 peroxisome proliferator-activated receptor alpha                     |
| GO lipid binding                        | 16  | 116  | 0.0055177 | 56288 par-3 partitioning defective 3 homolog (C. elegans)                 |
| GO lipid binding                        | 16  | 116  | 0.0055177 | 5742 prostaglandin-endoperoxide synthase 1 (prostaglandin G/H synthase a) |
| GO lipid binding                        | 16  | 116  | 0.0055177 | 80830 apolipoprotein L, 6                                                 |
| GO lipid binding                        | 16  | 116  | 0.0055177 | 80833 apolipoprotein L, 3                                                 |
| GO lipid binding                        | 16  | 116  | 0.0055177 | 83394 PITPNM family member 3                                              |
| GO lipid binding                        | 16  | 116  | 0.0055177 | 8542 apolipoprotein L, 1                                                  |
| GO lipid binding                        | 16  | 116  | 0.0055177 | 92747 chromosome 20 open reading frame 114                                |
| GO phosphatidylinositol binding         | 5   | 18   | 0.0059855 | 5295 phosphoinositide-3-kinase, regulatory subunit 1 (alpha)              |
| GO phosphatidylinositol binding         | 5   | 18   | 0.0059855 | 6857 synaptotagmin I                                                      |
| GO phosphatidylinositol binding         | 5   | 18   | 0.0059855 | 85477 scinderin                                                           |
| GO phosphatidylinositol binding         | 5   | 18   | 0.0059855 | 91404 SEC14 and spectrin domains 1                                        |
| GO phosphatidylinositol binding         | 5   | 18   | 0.0059855 | 9892 synaptosomal-associated protein, 91kDa homolog (mouse)               |
| GO metal ion binding                    | 213 | 2658 | 0.0060111 | 10106 CTD (carboxy-terminal domain, RNA polymerase II, polypeptide A) sma |
| GO metal ion binding                    | 213 | 2658 | 0.0060111 | 10156 RAS p21 protein activator 4                                         |
| GO metal ion binding                    | 213 | 2658 | 0.0060111 | 10346 tripartite motif-containing 22                                      |
| GO metal ion binding                    | 213 | 2658 | 0.0060111 | 104 adenosine deaminase, RNA-specific, B1 (RED1 homolog rat)              |
| GO metal ion binding                    | 213 | 2658 | 0.0060111 | 10417 spondin 2, extracellular matrix protein                             |
| GO metal ion binding                    | 213 | 2658 | 0.0060111 | 10838 zinc finger protein 275                                             |

|                      |     |      |           |                                                                   |
|----------------------|-----|------|-----------|-------------------------------------------------------------------|
| GO metal ion binding | 213 | 2658 | 0.0060111 | 10906 TRAF-type zinc finger domain containing 1                   |
| GO metal ion binding | 213 | 2658 | 0.0060111 | 11043 midline 2                                                   |
| GO metal ion binding | 213 | 2658 | 0.0060111 | 11074 tripartite motif-containing 31                              |
| GO metal ion binding | 213 | 2658 | 0.0060111 | 11155 LIM domain binding 3                                        |
| GO metal ion binding | 213 | 2658 | 0.0060111 | 112 adenylate cyclase 6                                           |
| GO metal ion binding | 213 | 2658 | 0.0060111 | 11200 CHK2 checkpoint homolog ( <i>S. pombe</i> )                 |
| GO metal ion binding | 213 | 2658 | 0.0060111 | 11238 carbonic anhydrase VB, mitochondrial                        |
| GO metal ion binding | 213 | 2658 | 0.0060111 | 1124 chimerin (chimaerin) 2                                       |
| GO metal ion binding | 213 | 2658 | 0.0060111 | 11279 Kruppel-like factor 8                                       |
| GO metal ion binding | 213 | 2658 | 0.0060111 | 115196 zinc finger protein 554                                    |
| GO metal ion binding | 213 | 2658 | 0.0060111 | 116113 forkhead box P4                                            |
| GO metal ion binding | 213 | 2658 | 0.0060111 | 116984 ArfGAP with RhoGAP domain, ankyrin repeat and PH domain 2  |
| GO metal ion binding | 213 | 2658 | 0.0060111 | 118429 anthrax toxin receptor 2                                   |
| GO metal ion binding | 213 | 2658 | 0.0060111 | 118987 PDZ domain containing 8                                    |
| GO metal ion binding | 213 | 2658 | 0.0060111 | 124 alcohol dehydrogenase 1A (class I), alpha polypeptide         |
| GO metal ion binding | 213 | 2658 | 0.0060111 | 125 alcohol dehydrogenase 1B (class I), beta polypeptide          |
| GO metal ion binding | 213 | 2658 | 0.0060111 | 130399 activin A receptor, type IC                                |
| GO metal ion binding | 213 | 2658 | 0.0060111 | 134218 DnaJ (Hsp40) homolog, subfamily C, member 21               |
| GO metal ion binding | 213 | 2658 | 0.0060111 | 135644 tripartite motif-containing 40                             |
| GO metal ion binding | 213 | 2658 | 0.0060111 | 1363 carboxypeptidase E                                           |
| GO metal ion binding | 213 | 2658 | 0.0060111 | 1368 carboxypeptidase M                                           |
| GO metal ion binding | 213 | 2658 | 0.0060111 | 143425 synaptotagmin IX                                           |
| GO metal ion binding | 213 | 2658 | 0.0060111 | 147694 zinc finger protein 548                                    |
| GO metal ion binding | 213 | 2658 | 0.0060111 | 147923 zinc finger protein 420                                    |
| GO metal ion binding | 213 | 2658 | 0.0060111 | 151636 deltex 3-like ( <i>Drosophila</i> )                        |
| GO metal ion binding | 213 | 2658 | 0.0060111 | 152273 FYVE, RhoGEF and PH domain containing 5                    |
| GO metal ion binding | 213 | 2658 | 0.0060111 | 154214 ring finger protein 217                                    |
| GO metal ion binding | 213 | 2658 | 0.0060111 | 1558 cytochrome P450, family 2, subfamily C, polypeptide 8        |
| GO metal ion binding | 213 | 2658 | 0.0060111 | 1559 cytochrome P450, family 2, subfamily C, polypeptide 9        |
| GO metal ion binding | 213 | 2658 | 0.0060111 | 1571 cytochrome P450, family 2, subfamily E, polypeptide 1        |
| GO metal ion binding | 213 | 2658 | 0.0060111 | 1577 cytochrome P450, family 3, subfamily A, polypeptide 5        |
| GO metal ion binding | 213 | 2658 | 0.0060111 | 162962 zinc finger protein 836                                    |
| GO metal ion binding | 213 | 2658 | 0.0060111 | 163050 zinc finger protein 564                                    |
| GO metal ion binding | 213 | 2658 | 0.0060111 | 163115 zinc finger protein 781                                    |
| GO metal ion binding | 213 | 2658 | 0.0060111 | 170692 ADAM metallopeptidase with thrombospondin type 1 motif, 18 |
| GO metal ion binding | 213 | 2658 | 0.0060111 | 1958 early growth response 1                                      |

|                      |     |      |           |                                                                 |
|----------------------|-----|------|-----------|-----------------------------------------------------------------|
| GO metal ion binding | 213 | 2658 | 0.0060111 | 1959 early growth response 2                                    |
| GO metal ion binding | 213 | 2658 | 0.0060111 | 1960 early growth response 3                                    |
| GO metal ion binding | 213 | 2658 | 0.0060111 | 201501 zinc finger and BTB domain containing 7C                 |
| GO metal ion binding | 213 | 2658 | 0.0060111 | 2033 E1A binding protein p300                                   |
| GO metal ion binding | 213 | 2658 | 0.0060111 | 2122 MDS1 and EVI1 complex locus                                |
| GO metal ion binding | 213 | 2658 | 0.0060111 | 2153 coagulation factor V (proaccelerin, labile factor)         |
| GO metal ion binding | 213 | 2658 | 0.0060111 | 220441 ring finger protein 152                                  |
| GO metal ion binding | 213 | 2658 | 0.0060111 | 22807 IKAROS family zinc finger 2 (Helios)                      |
| GO metal ion binding | 213 | 2658 | 0.0060111 | 22901 arylsulfatase G                                           |
| GO metal ion binding | 213 | 2658 | 0.0060111 | 22998 LIM and calponin homology domains 1                       |
| GO metal ion binding | 213 | 2658 | 0.0060111 | 23035 PH domain and leucine rich repeat protein phosphatase 2   |
| GO metal ion binding | 213 | 2658 | 0.0060111 | 23081 lysine (K)-specific demethylase 4C                        |
| GO metal ion binding | 213 | 2658 | 0.0060111 | 23099 zinc finger and BTB domain containing 43                  |
| GO metal ion binding | 213 | 2658 | 0.0060111 | 23119 hypermethylated in cancer 2                               |
| GO metal ion binding | 213 | 2658 | 0.0060111 | 23338 PHD finger protein 15                                     |
| GO metal ion binding | 213 | 2658 | 0.0060111 | 23371 tensin like C1 domain containing phosphatase (tensin 2)   |
| GO metal ion binding | 213 | 2658 | 0.0060111 | 23650 tripartite motif-containing 29                            |
| GO metal ion binding | 213 | 2658 | 0.0060111 | 23774 bromodomain containing 1                                  |
| GO metal ion binding | 213 | 2658 | 0.0060111 | 240 arachidonate 5-lipoxygenase                                 |
| GO metal ion binding | 213 | 2658 | 0.0060111 | 2521 fused in sarcoma                                           |
| GO metal ion binding | 213 | 2658 | 0.0060111 | 254295 phytanoyl-CoA dioxygenase domain containing 1            |
| GO metal ion binding | 213 | 2658 | 0.0060111 | 255488 ring finger protein 144B                                 |
| GO metal ion binding | 213 | 2658 | 0.0060111 | 256051 zinc finger protein 549                                  |
| GO metal ion binding | 213 | 2658 | 0.0060111 | 25862 ubiquitin specific peptidase 49                           |
| GO metal ion binding | 213 | 2658 | 0.0060111 | 25946 zinc finger protein 385A                                  |
| GO metal ion binding | 213 | 2658 | 0.0060111 | 2624 GATA binding protein 2                                     |
| GO metal ion binding | 213 | 2658 | 0.0060111 | 26468 LIM homeobox 6                                            |
| GO metal ion binding | 213 | 2658 | 0.0060111 | 27035 NADPH oxidase 1                                           |
| GO metal ion binding | 213 | 2658 | 0.0060111 | 27246 ring finger protein 115                                   |
| GO metal ion binding | 213 | 2658 | 0.0060111 | 27295 PDZ and LIM domain 3                                      |
| GO metal ion binding | 213 | 2658 | 0.0060111 | 2737 GLI family zinc finger 3                                   |
| GO metal ion binding | 213 | 2658 | 0.0060111 | 27434 polymerase (DNA directed), mu                             |
| GO metal ion binding | 213 | 2658 | 0.0060111 | 284346 zinc finger protein 575                                  |
| GO metal ion binding | 213 | 2658 | 0.0060111 | 284716 ribosomal modification protein rimK-like family member A |
| GO metal ion binding | 213 | 2658 | 0.0060111 | 29116 myosin regulatory light chain interacting protein         |
| GO metal ion binding | 213 | 2658 | 0.0060111 | 316 aldehyde oxidase 1                                          |

|                      |     |      |           |                                                                  |
|----------------------|-----|------|-----------|------------------------------------------------------------------|
| GO metal ion binding | 213 | 2658 | 0.0060111 | 3164 nuclear receptor subfamily 4, group A, member 1             |
| GO metal ion binding | 213 | 2658 | 0.0060111 | 3268 ArfGAP with FG repeats 2                                    |
| GO metal ion binding | 213 | 2658 | 0.0060111 | 342908 zinc finger protein 404                                   |
| GO metal ion binding | 213 | 2658 | 0.0060111 | 345462 zinc finger protein 879                                   |
| GO metal ion binding | 213 | 2658 | 0.0060111 | 3486 insulin-like growth factor binding protein 3                |
| GO metal ion binding | 213 | 2658 | 0.0060111 | 3643 insulin receptor                                            |
| GO metal ion binding | 213 | 2658 | 0.0060111 | 376940 zinc finger CCCH-type containing 6                        |
| GO metal ion binding | 213 | 2658 | 0.0060111 | 378925 ring finger protein 148                                   |
| GO metal ion binding | 213 | 2658 | 0.0060111 | 388536 zinc finger protein 790                                   |
| GO metal ion binding | 213 | 2658 | 0.0060111 | 388558 zinc finger protein 808                                   |
| GO metal ion binding | 213 | 2658 | 0.0060111 | 388567 zinc finger protein 749                                   |
| GO metal ion binding | 213 | 2658 | 0.0060111 | 388591 ring finger protein 207                                   |
| GO metal ion binding | 213 | 2658 | 0.0060111 | 389058 Sp5 transcription factor                                  |
| GO metal ion binding | 213 | 2658 | 0.0060111 | 390667 pentraxin 4, long                                         |
| GO metal ion binding | 213 | 2658 | 0.0060111 | 3983 actin binding LIM protein 1                                 |
| GO metal ion binding | 213 | 2658 | 0.0060111 | 4005 LIM domain only 2 (rhombotin-like 1)                        |
| GO metal ion binding | 213 | 2658 | 0.0060111 | 4007 prickle homolog 3 (Drosophila)                              |
| GO metal ion binding | 213 | 2658 | 0.0060111 | 400713 zinc finger protein 880                                   |
| GO metal ion binding | 213 | 2658 | 0.0060111 | 4008 LIM domain 7                                                |
| GO metal ion binding | 213 | 2658 | 0.0060111 | 4015 lysyl oxidase                                               |
| GO metal ion binding | 213 | 2658 | 0.0060111 | 412 steroid sulfatase (microsomal), isozyme S                    |
| GO metal ion binding | 213 | 2658 | 0.0060111 | 4151 myoglobin                                                   |
| GO metal ion binding | 213 | 2658 | 0.0060111 | 4194 Mdm4 p53 binding protein homolog (mouse)                    |
| GO metal ion binding | 213 | 2658 | 0.0060111 | 4306 nuclear receptor subfamily 3, group C, member 2             |
| GO metal ion binding | 213 | 2658 | 0.0060111 | 4316 matrix metallopeptidase 7 (matrilysin, uterine)             |
| GO metal ion binding | 213 | 2658 | 0.0060111 | 4638 myosin light chain kinase                                   |
| GO metal ion binding | 213 | 2658 | 0.0060111 | 48 aconitase 1, soluble                                          |
| GO metal ion binding | 213 | 2658 | 0.0060111 | 4842 nitric oxide synthase 1 (neuronal)                          |
| GO metal ion binding | 213 | 2658 | 0.0060111 | 4929 nuclear receptor subfamily 4, group A, member 2             |
| GO metal ion binding | 213 | 2658 | 0.0060111 | 493 ATPase, Ca <sup>++</sup> transporting, plasma membrane 4     |
| GO metal ion binding | 213 | 2658 | 0.0060111 | 5053 phenylalanine hydroxylase                                   |
| GO metal ion binding | 213 | 2658 | 0.0060111 | 5063 p21 protein (Cdc42/Rac)-activated kinase 3                  |
| GO metal ion binding | 213 | 2658 | 0.0060111 | 5066 peptidylglycine alpha-amidating monooxygenase               |
| GO metal ion binding | 213 | 2658 | 0.0060111 | 5071 Parkinson disease (autosomal recessive, juvenile) 2, parkin |
| GO metal ion binding | 213 | 2658 | 0.0060111 | 51274 Kruppel-like factor 3 (basic)                              |
| GO metal ion binding | 213 | 2658 | 0.0060111 | 5136 phosphodiesterase 1A, calmodulin-dependent                  |

|                      |     |      |           |                                                                             |
|----------------------|-----|------|-----------|-----------------------------------------------------------------------------|
| GO metal ion binding | 213 | 2658 | 0.0060111 | 5152 phosphodiesterase 9A                                                   |
| GO metal ion binding | 213 | 2658 | 0.0060111 | 51523 CXXC finger 5                                                         |
| GO metal ion binding | 213 | 2658 | 0.0060111 | 5158 phosphodiesterase 6B, cGMP-specific, rod, beta                         |
| GO metal ion binding | 213 | 2658 | 0.0060111 | 51621 Kruppel-like factor 13                                                |
| GO metal ion binding | 213 | 2658 | 0.0060111 | 51710 zinc finger protein 44                                                |
| GO metal ion binding | 213 | 2658 | 0.0060111 | 5325 pleiomorphic adenoma gene-like 1                                       |
| GO metal ion binding | 213 | 2658 | 0.0060111 | 5351 procollagen-lysine 1, 2-oxoglutarate 5-dioxygenase 1                   |
| GO metal ion binding | 213 | 2658 | 0.0060111 | 5371 promyelocytic leukemia                                                 |
| GO metal ion binding | 213 | 2658 | 0.0060111 | 54511 3-hydroxymethyl-3-methylglutaryl-Coenzyme A lyase-like 1              |
| GO metal ion binding | 213 | 2658 | 0.0060111 | 5465 peroxisome proliferator-activated receptor alpha                       |
| GO metal ion binding | 213 | 2658 | 0.0060111 | 54739 XIAP associated factor 1                                              |
| GO metal ion binding | 213 | 2658 | 0.0060111 | 54877 zinc finger, CCHC domain containing 2                                 |
| GO metal ion binding | 213 | 2658 | 0.0060111 | 54894 ring finger protein 43                                                |
| GO metal ion binding | 213 | 2658 | 0.0060111 | 54904 Wolf-Hirschhorn syndrome candidate 1-like 1                           |
| GO metal ion binding | 213 | 2658 | 0.0060111 | 55140 elongation protein 3 homolog ( <i>S. cerevisiae</i> )                 |
| GO metal ion binding | 213 | 2658 | 0.0060111 | 55432 YOD1 OTU deubiquinating enzyme 1 homolog ( <i>S. cerevisiae</i> )     |
| GO metal ion binding | 213 | 2658 | 0.0060111 | 55616 ArfGAP with SH3 domain, ankyrin repeat and PH domain 3                |
| GO metal ion binding | 213 | 2658 | 0.0060111 | 55657 zinc finger protein 692                                               |
| GO metal ion binding | 213 | 2658 | 0.0060111 | 55693 lysine (K)-specific demethylase 4D                                    |
| GO metal ion binding | 213 | 2658 | 0.0060111 | 55762 zinc finger protein 701                                               |
| GO metal ion binding | 213 | 2658 | 0.0060111 | 55769 zinc finger protein 83                                                |
| GO metal ion binding | 213 | 2658 | 0.0060111 | 55799 calcium channel, voltage-dependent, alpha 2/delta subunit 3           |
| GO metal ion binding | 213 | 2658 | 0.0060111 | 55870 ash1 (absent, small, or homeotic)-like ( <i>Drosophila</i> )          |
| GO metal ion binding | 213 | 2658 | 0.0060111 | 55893 zinc finger protein 395                                               |
| GO metal ion binding | 213 | 2658 | 0.0060111 | 56547 matrix metalloproteinase 26                                           |
| GO metal ion binding | 213 | 2658 | 0.0060111 | 56913 core 1 synthase, glycoprotein-N-acetylgalactosamine 3-beta-galactosyl |
| GO metal ion binding | 213 | 2658 | 0.0060111 | 56978 PR domain containing 8                                                |
| GO metal ion binding | 213 | 2658 | 0.0060111 | 57094 carboxypeptidase A6                                                   |
| GO metal ion binding | 213 | 2658 | 0.0060111 | 57379 activation-induced cytidine deaminase                                 |
| GO metal ion binding | 213 | 2658 | 0.0060111 | 5742 prostaglandin-endoperoxide synthase 1 (prostaglandin G/H synthase a    |
| GO metal ion binding | 213 | 2658 | 0.0060111 | 57459 GATA zinc finger domain containing 2B                                 |
| GO metal ion binding | 213 | 2658 | 0.0060111 | 57494 ribosomal modification protein rimK-like family member B              |
| GO metal ion binding | 213 | 2658 | 0.0060111 | 57643 zinc finger, SWIM-type containing 5                                   |
| GO metal ion binding | 213 | 2658 | 0.0060111 | 59344 arachidonate lipoxygenase 3                                           |
| GO metal ion binding | 213 | 2658 | 0.0060111 | 604 B-cell CLL/lymphoma 6                                                   |
| GO metal ion binding | 213 | 2658 | 0.0060111 | 6096 RAR-related orphan receptor B                                          |

|                      |     |      |           |                                                                           |
|----------------------|-----|------|-----------|---------------------------------------------------------------------------|
| GO metal ion binding | 213 | 2658 | 0.0060111 | 6097 RAR-related orphan receptor C                                        |
| GO metal ion binding | 213 | 2658 | 0.0060111 | 6239 ras responsive element binding protein 1                             |
| GO metal ion binding | 213 | 2658 | 0.0060111 | 6256 retinoid X receptor, alpha                                           |
| GO metal ion binding | 213 | 2658 | 0.0060111 | 64135 interferon induced with helicase C domain 1                         |
| GO metal ion binding | 213 | 2658 | 0.0060111 | 687 Kruppel-like factor 9                                                 |
| GO metal ion binding | 213 | 2658 | 0.0060111 | 6916 thromboxane A synthase 1 (platelet)                                  |
| GO metal ion binding | 213 | 2658 | 0.0060111 | 6941 transcription factor 19                                              |
| GO metal ion binding | 213 | 2658 | 0.0060111 | 7026 nuclear receptor subfamily 2, group F, member 2                      |
| GO metal ion binding | 213 | 2658 | 0.0060111 | 7071 Kruppel-like factor 10                                               |
| GO metal ion binding | 213 | 2658 | 0.0060111 | 7076 TIMP metalloproteinase inhibitor 1                                   |
| GO metal ion binding | 213 | 2658 | 0.0060111 | 7227 trichorhinophalangeal syndrome I                                     |
| GO metal ion binding | 213 | 2658 | 0.0060111 | 7404 ubiquitously transcribed tetratricopeptide repeat gene, Y-linked     |
| GO metal ion binding | 213 | 2658 | 0.0060111 | 7538 zinc finger protein 36, C3H type, homolog (mouse)                    |
| GO metal ion binding | 213 | 2658 | 0.0060111 | 7546 Zic family member 2 (odd-paired homolog, Drosophila)                 |
| GO metal ion binding | 213 | 2658 | 0.0060111 | 7565 zinc finger protein 17                                               |
| GO metal ion binding | 213 | 2658 | 0.0060111 | 7597 zinc finger and BTB domain containing 25                             |
| GO metal ion binding | 213 | 2658 | 0.0060111 | 760 carbonic anhydrase II                                                 |
| GO metal ion binding | 213 | 2658 | 0.0060111 | 7678 zinc finger protein 124                                              |
| GO metal ion binding | 213 | 2658 | 0.0060111 | 7706 tripartite motif-containing 25                                       |
| GO metal ion binding | 213 | 2658 | 0.0060111 | 771 carbonic anhydrase XII                                                |
| GO metal ion binding | 213 | 2658 | 0.0060111 | 79132 DEXH (Asp-Glu-X-His) box polypeptide 58                             |
| GO metal ion binding | 213 | 2658 | 0.0060111 | 79152 fatty acid 2-hydroxylase                                            |
| GO metal ion binding | 213 | 2658 | 0.0060111 | 79444 baculoviral IAP repeat-containing 7                                 |
| GO metal ion binding | 213 | 2658 | 0.0060111 | 79673 zinc finger protein 329                                             |
| GO metal ion binding | 213 | 2658 | 0.0060111 | 79689 STEAP family member 4                                               |
| GO metal ion binding | 213 | 2658 | 0.0060111 | 79872 Cas-Br-M (murine) ecotropic retroviral transforming sequence-like 1 |
| GO metal ion binding | 213 | 2658 | 0.0060111 | 79894 zinc finger protein 672                                             |
| GO metal ion binding | 213 | 2658 | 0.0060111 | 79956 endoplasmic reticulum metalloproteinase 1                           |
| GO metal ion binding | 213 | 2658 | 0.0060111 | 8013 nuclear receptor subfamily 4, group A, member 3                      |
| GO metal ion binding | 213 | 2658 | 0.0060111 | 81603 tripartite motif-containing 8                                       |
| GO metal ion binding | 213 | 2658 | 0.0060111 | 81844 tripartite motif-containing 56                                      |
| GO metal ion binding | 213 | 2658 | 0.0060111 | 83593 Ras association (RalGDS/AF-6) domain family member 5                |
| GO metal ion binding | 213 | 2658 | 0.0060111 | 84033 obscurin, cytoskeletal calmodulin and titin-interacting RhoGEF      |
| GO metal ion binding | 213 | 2658 | 0.0060111 | 84124 zinc finger protein 394                                             |
| GO metal ion binding | 213 | 2658 | 0.0060111 | 84171 lysyl oxidase-like 4                                                |
| GO metal ion binding | 213 | 2658 | 0.0060111 | 8462 Kruppel-like factor 11                                               |

|                      |     |      |           |                                                                                |
|----------------------|-----|------|-----------|--------------------------------------------------------------------------------|
| GO metal ion binding | 213 | 2658 | 0.0060111 | 84858 zinc finger protein 503                                                  |
| GO metal ion binding | 213 | 2658 | 0.0060111 | 84911 zinc finger protein 382                                                  |
| GO metal ion binding | 213 | 2658 | 0.0060111 | 8527 diacylglycerol kinase, delta 130kDa                                       |
| GO metal ion binding | 213 | 2658 | 0.0060111 | 85416 Zic family member 5 (odd-paired homolog, Drosophila)                     |
| GO metal ion binding | 213 | 2658 | 0.0060111 | 8543 LIM domain only 4                                                         |
| GO metal ion binding | 213 | 2658 | 0.0060111 | 85441 peroxisomal proliferator-activated receptor A interacting complex 285    |
| GO metal ion binding | 213 | 2658 | 0.0060111 | 862 runt-related transcription factor 1; translocated to, 1 (cyclin D-related) |
| GO metal ion binding | 213 | 2658 | 0.0060111 | 8622 phosphodiesterase 8B                                                      |
| GO metal ion binding | 213 | 2658 | 0.0060111 | 8751 ADAM metallopeptidase domain 15                                           |
| GO metal ion binding | 213 | 2658 | 0.0060111 | 8796 sciellin                                                                  |
| GO metal ion binding | 213 | 2658 | 0.0060111 | 89870 tripartite motif-containing 15                                           |
| GO metal ion binding | 213 | 2658 | 0.0060111 | 90592 zinc finger protein 700                                                  |
| GO metal ion binding | 213 | 2658 | 0.0060111 | 91 activin A receptor, type IB                                                 |
| GO metal ion binding | 213 | 2658 | 0.0060111 | 92283 zinc finger protein 461                                                  |
| GO metal ion binding | 213 | 2658 | 0.0060111 | 92822 zinc finger protein 276                                                  |
| GO metal ion binding | 213 | 2658 | 0.0060111 | 9314 Kruppel-like factor 4 (gut)                                               |
| GO metal ion binding | 213 | 2658 | 0.0060111 | 93349 SP140 nuclear body protein-like                                          |
| GO metal ion binding | 213 | 2658 | 0.0060111 | 93589 calcium channel, voltage-dependent, alpha 2/delta subunit 4              |
| GO metal ion binding | 213 | 2658 | 0.0060111 | 94 activin A receptor type II-like 1                                           |
| GO metal ion binding | 213 | 2658 | 0.0060111 | 94059 leukocyte receptor cluster (LRC) member 9                                |
| GO metal ion binding | 213 | 2658 | 0.0060111 | 9422 zinc finger protein 264                                                   |
| GO metal ion binding | 213 | 2658 | 0.0060111 | 9510 ADAM metallopeptidase with thrombospondin type 1 motif, 1                 |
| GO metal ion binding | 213 | 2658 | 0.0060111 | 9572 nuclear receptor subfamily 1, group D, member 1                           |
| GO metal ion binding | 213 | 2658 | 0.0060111 | 9615 guanine deaminase                                                         |
| GO metal ion binding | 213 | 2658 | 0.0060111 | 9633 metallothionein-like 5, testis-specific (tesmin)                          |
| GO metal ion binding | 213 | 2658 | 0.0060111 | 9914 ATPase, Ca <sup>++</sup> transporting, type 2C, member 2                  |
| GO metal ion binding | 213 | 2658 | 0.0060111 | 9971 nuclear receptor subfamily 1, group H, member 4                           |
| GO sarcolemma        | 10  | 59   | 0.0062544 | 112 adenylate cyclase 6                                                        |
| GO sarcolemma        | 10  | 59   | 0.0062544 | 1508 cathepsin B                                                               |
| GO sarcolemma        | 10  | 59   | 0.0062544 | 154 adrenergic, beta-2-, receptor, surface                                     |
| GO sarcolemma        | 10  | 59   | 0.0062544 | 240 arachidonate 5-lipoxygenase                                                |
| GO sarcolemma        | 10  | 59   | 0.0062544 | 358 aquaporin 1 (Colton blood group)                                           |
| GO sarcolemma        | 10  | 59   | 0.0062544 | 4842 nitric oxide synthase 1 (neuronal)                                        |
| GO sarcolemma        | 10  | 59   | 0.0062544 | 5239 phosphoglucomutase 5                                                      |
| GO sarcolemma        | 10  | 59   | 0.0062544 | 682 basigin (Ok blood group)                                                   |
| GO sarcolemma        | 10  | 59   | 0.0062544 | 783 calcium channel, voltage-dependent, beta 2 subunit                         |

|                                     |    |     |           |                                                                              |
|-------------------------------------|----|-----|-----------|------------------------------------------------------------------------------|
| GO sarcolemma                       | 10 | 59  | 0.0062544 | 8082 sarcospan (Kras oncogene-associated gene)                               |
| GO positive regulation of apoptosis | 15 | 108 | 0.0066353 | 10628 thioredoxin interacting protein                                        |
| GO positive regulation of apoptosis | 15 | 108 | 0.0066353 | 154 adrenergic, beta-2-, receptor, surface                                   |
| GO positive regulation of apoptosis | 15 | 108 | 0.0066353 | 1785 dynamin 2                                                               |
| GO positive regulation of apoptosis | 15 | 108 | 0.0066353 | 183 angiotensinogen (serpin peptidase inhibitor, clade A, member 8)          |
| GO positive regulation of apoptosis | 15 | 108 | 0.0066353 | 1843 dual specificity phosphatase 1                                          |
| GO positive regulation of apoptosis | 15 | 108 | 0.0066353 | 3486 insulin-like growth factor binding protein 3                            |
| GO positive regulation of apoptosis | 15 | 108 | 0.0066353 | 3827 kininogen 1                                                             |
| GO positive regulation of apoptosis | 15 | 108 | 0.0066353 | 4851 Notch homolog 1, translocation-associated (Drosophila)                  |
| GO positive regulation of apoptosis | 15 | 108 | 0.0066353 | 5608 mitogen-activated protein kinase kinase 6                               |
| GO positive regulation of apoptosis | 15 | 108 | 0.0066353 | 604 B-cell CLL/lymphoma 6                                                    |
| GO positive regulation of apoptosis | 15 | 108 | 0.0066353 | 6256 retinoid X receptor, alpha                                              |
| GO positive regulation of apoptosis | 15 | 108 | 0.0066353 | 652 bone morphogenetic protein 4                                             |
| GO positive regulation of apoptosis | 15 | 108 | 0.0066353 | 7099 toll-like receptor 4                                                    |
| GO positive regulation of apoptosis | 15 | 108 | 0.0066353 | 85477 scinderin                                                              |
| GO positive regulation of apoptosis | 15 | 108 | 0.0066353 | 885 cholecystokinin                                                          |
| GO cell-cell signaling              | 27 | 238 | 0.0066554 | 10253 sprouty homolog 2 (Drosophila)                                         |
| GO cell-cell signaling              | 27 | 238 | 0.0066554 | 10288 leukocyte immunoglobulin-like receptor, subfamily B (with TM and ITIM  |
| GO cell-cell signaling              | 27 | 238 | 0.0066554 | 183 angiotensinogen (serpin peptidase inhibitor, clade A, member 8)          |
| GO cell-cell signaling              | 27 | 238 | 0.0066554 | 1906 endothelin 1                                                            |
| GO cell-cell signaling              | 27 | 238 | 0.0066554 | 1948 ephrin-B2                                                               |
| GO cell-cell signaling              | 27 | 238 | 0.0066554 | 23418 crumbs homolog 1 (Drosophila)                                          |
| GO cell-cell signaling              | 27 | 238 | 0.0066554 | 26281 fibroblast growth factor 20                                            |
| GO cell-cell signaling              | 27 | 238 | 0.0066554 | 2706 gap junction protein, beta 2, 26kDa                                     |
| GO cell-cell signaling              | 27 | 238 | 0.0066554 | 3689 integrin, beta 2 (complement component 3 receptor 3 and 4 subunit)      |
| GO cell-cell signaling              | 27 | 238 | 0.0066554 | 4680 carcinoembryonic antigen-related cell adhesion molecule 6 (non-specif   |
| GO cell-cell signaling              | 27 | 238 | 0.0066554 | 5122 proprotein convertase subtilisin/kexin type 1                           |
| GO cell-cell signaling              | 27 | 238 | 0.0066554 | 54361 wingless-type MMTV integration site family, member 4                   |
| GO cell-cell signaling              | 27 | 238 | 0.0066554 | 55870 ash1 (absent, small, or homeotic)-like (Drosophila)                    |
| GO cell-cell signaling              | 27 | 238 | 0.0066554 | 56923 neuromedin U receptor 2                                                |
| GO cell-cell signaling              | 27 | 238 | 0.0066554 | 6372 chemokine (C-X-C motif) ligand 6 (granulocyte chemotactic protein 2)    |
| GO cell-cell signaling              | 27 | 238 | 0.0066554 | 6374 chemokine (C-X-C motif) ligand 5                                        |
| GO cell-cell signaling              | 27 | 238 | 0.0066554 | 6750 somatostatin                                                            |
| GO cell-cell signaling              | 27 | 238 | 0.0066554 | 6751 somatostatin receptor 1                                                 |
| GO cell-cell signaling              | 27 | 238 | 0.0066554 | 684 bone marrow stromal cell antigen 2                                       |
| GO cell-cell signaling              | 27 | 238 | 0.0066554 | 7022 transcription factor AP-2 gamma (activating enhancer binding protein 2) |



|                        |     |      |           |                                                                              |
|------------------------|-----|------|-----------|------------------------------------------------------------------------------|
| GO cell-cell signaling | 27  | 238  | 0.0066554 | 7071 Kruppel-like factor 10                                                  |
| GO cell-cell signaling | 27  | 238  | 0.0066554 | 7477 wingless-type MMTV integration site family, member 7B                   |
| GO cell-cell signaling | 27  | 238  | 0.0066554 | 7869 sema domain, immunoglobulin domain (Ig), short basic domain, secret     |
| GO cell-cell signaling | 27  | 238  | 0.0066554 | 8744 tumor necrosis factor (ligand) superfamily, member 9                    |
| GO cell-cell signaling | 27  | 238  | 0.0066554 | 8839 WNT1 inducible signaling pathway protein 2                              |
| GO cell-cell signaling | 27  | 238  | 0.0066554 | 9019 myelin protein zero-like 1                                              |
| GO cell-cell signaling | 27  | 238  | 0.0066554 | 9518 growth differentiation factor 15                                        |
| GO lung development    | 10  | 60   | 0.0070569 | 1080 cystic fibrosis transmembrane conductance regulator (ATP-binding cas:   |
| GO lung development    | 10  | 60   | 0.0070569 | 2033 E1A binding protein p300                                                |
| GO lung development    | 10  | 60   | 0.0070569 | 2737 GLI family zinc finger 3                                                |
| GO lung development    | 10  | 60   | 0.0070569 | 3169 forkhead box A1                                                         |
| GO lung development    | 10  | 60   | 0.0070569 | 3911 laminin, alpha 5                                                        |
| GO lung development    | 10  | 60   | 0.0070569 | 4015 lysyl oxidase                                                           |
| GO lung development    | 10  | 60   | 0.0070569 | 4087 SMAD family member 2                                                    |
| GO lung development    | 10  | 60   | 0.0070569 | 4851 Notch homolog 1, translocation-associated (Drosophila)                  |
| GO lung development    | 10  | 60   | 0.0070569 | 5950 retinol binding protein 4, plasma                                       |
| GO lung development    | 10  | 60   | 0.0070569 | 7474 wingless-type MMTV integration site family, member 5A                   |
| GO response to hypoxia | 18  | 140  | 0.0070871 | 1139 cholinergic receptor, nicotinic, alpha 7                                |
| GO response to hypoxia | 18  | 140  | 0.0070871 | 1803 dipeptidyl-peptidase 4                                                  |
| GO response to hypoxia | 18  | 140  | 0.0070871 | 1906 endothelin 1                                                            |
| GO response to hypoxia | 18  | 140  | 0.0070871 | 2033 E1A binding protein p300                                                |
| GO response to hypoxia | 18  | 140  | 0.0070871 | 3709 inositol 1,4,5-triphosphate receptor, type 2                            |
| GO response to hypoxia | 18  | 140  | 0.0070871 | 4151 myoglobin                                                               |
| GO response to hypoxia | 18  | 140  | 0.0070871 | 4842 nitric oxide synthase 1 (neuronal)                                      |
| GO response to hypoxia | 18  | 140  | 0.0070871 | 4929 nuclear receptor subfamily 4, group A, member 2                         |
| GO response to hypoxia | 18  | 140  | 0.0070871 | 5327 plasminogen activator, tissue                                           |
| GO response to hypoxia | 18  | 140  | 0.0070871 | 5351 procollagen-lysine 1, 2-oxoglutarate 5-dioxygenase 1                    |
| GO response to hypoxia | 18  | 140  | 0.0070871 | 5371 promyelocytic leukemia                                                  |
| GO response to hypoxia | 18  | 140  | 0.0070871 | 5465 peroxisome proliferator-activated receptor alpha                        |
| GO response to hypoxia | 18  | 140  | 0.0070871 | 7097 toll-like receptor 2                                                    |
| GO response to hypoxia | 18  | 140  | 0.0070871 | 7099 toll-like receptor 4                                                    |
| GO response to hypoxia | 18  | 140  | 0.0070871 | 7852 chemokine (C-X-C motif) receptor 4                                      |
| GO response to hypoxia | 18  | 140  | 0.0070871 | 834 caspase 1, apoptosis-related cysteine peptidase (interleukin 1, beta, co |
| GO response to hypoxia | 18  | 140  | 0.0070871 | 9021 suppressor of cytokine signaling 3                                      |
| GO response to hypoxia | 18  | 140  | 0.0070871 | 952 CD38 molecule                                                            |
| GO zinc ion binding    | 154 | 1867 | 0.0071938 | 10346 tripartite motif-containing 22                                         |

|                     |     |      |           |                                                                   |
|---------------------|-----|------|-----------|-------------------------------------------------------------------|
| GO zinc ion binding | 154 | 1867 | 0.0071938 | 10838 zinc finger protein 275                                     |
| GO zinc ion binding | 154 | 1867 | 0.0071938 | 10906 TRAF-type zinc finger domain containing 1                   |
| GO zinc ion binding | 154 | 1867 | 0.0071938 | 11043 midline 2                                                   |
| GO zinc ion binding | 154 | 1867 | 0.0071938 | 11074 tripartite motif-containing 31                              |
| GO zinc ion binding | 154 | 1867 | 0.0071938 | 11155 LIM domain binding 3                                        |
| GO zinc ion binding | 154 | 1867 | 0.0071938 | 11238 carbonic anhydrase VB, mitochondrial                        |
| GO zinc ion binding | 154 | 1867 | 0.0071938 | 11279 Kruppel-like factor 8                                       |
| GO zinc ion binding | 154 | 1867 | 0.0071938 | 115196 zinc finger protein 554                                    |
| GO zinc ion binding | 154 | 1867 | 0.0071938 | 116113 forkhead box P4                                            |
| GO zinc ion binding | 154 | 1867 | 0.0071938 | 116984 ArfGAP with RhoGAP domain, ankyrin repeat and PH domain 2  |
| GO zinc ion binding | 154 | 1867 | 0.0071938 | 124 alcohol dehydrogenase 1A (class I), alpha polypeptide         |
| GO zinc ion binding | 154 | 1867 | 0.0071938 | 125 alcohol dehydrogenase 1B (class I), beta polypeptide          |
| GO zinc ion binding | 154 | 1867 | 0.0071938 | 134218 DnaJ (Hsp40) homolog, subfamily C, member 21               |
| GO zinc ion binding | 154 | 1867 | 0.0071938 | 135644 tripartite motif-containing 40                             |
| GO zinc ion binding | 154 | 1867 | 0.0071938 | 1363 carboxypeptidase E                                           |
| GO zinc ion binding | 154 | 1867 | 0.0071938 | 1368 carboxypeptidase M                                           |
| GO zinc ion binding | 154 | 1867 | 0.0071938 | 147694 zinc finger protein 548                                    |
| GO zinc ion binding | 154 | 1867 | 0.0071938 | 147923 zinc finger protein 420                                    |
| GO zinc ion binding | 154 | 1867 | 0.0071938 | 151636 deltex 3-like (Drosophila)                                 |
| GO zinc ion binding | 154 | 1867 | 0.0071938 | 152273 FYVE, RhoGEF and PH domain containing 5                    |
| GO zinc ion binding | 154 | 1867 | 0.0071938 | 154214 ring finger protein 217                                    |
| GO zinc ion binding | 154 | 1867 | 0.0071938 | 162962 zinc finger protein 836                                    |
| GO zinc ion binding | 154 | 1867 | 0.0071938 | 163050 zinc finger protein 564                                    |
| GO zinc ion binding | 154 | 1867 | 0.0071938 | 163115 zinc finger protein 781                                    |
| GO zinc ion binding | 154 | 1867 | 0.0071938 | 170692 ADAM metallopeptidase with thrombospondin type 1 motif, 18 |
| GO zinc ion binding | 154 | 1867 | 0.0071938 | 1821 dystrophin related protein 2                                 |
| GO zinc ion binding | 154 | 1867 | 0.0071938 | 1958 early growth response 1                                      |
| GO zinc ion binding | 154 | 1867 | 0.0071938 | 1959 early growth response 2                                      |
| GO zinc ion binding | 154 | 1867 | 0.0071938 | 1960 early growth response 3                                      |
| GO zinc ion binding | 154 | 1867 | 0.0071938 | 201501 zinc finger and BTB domain containing 7C                   |
| GO zinc ion binding | 154 | 1867 | 0.0071938 | 2033 E1A binding protein p300                                     |
| GO zinc ion binding | 154 | 1867 | 0.0071938 | 2122 MDS1 and EVI1 complex locus                                  |
| GO zinc ion binding | 154 | 1867 | 0.0071938 | 220441 ring finger protein 152                                    |
| GO zinc ion binding | 154 | 1867 | 0.0071938 | 22807 IKAROS family zinc finger 2 (Helios)                        |
| GO zinc ion binding | 154 | 1867 | 0.0071938 | 22998 LIM and calponin homology domains 1                         |
| GO zinc ion binding | 154 | 1867 | 0.0071938 | 23081 lysine (K)-specific demethylase 4C                          |

|                     |     |      |           |                                                         |
|---------------------|-----|------|-----------|---------------------------------------------------------|
| GO zinc ion binding | 154 | 1867 | 0.0071938 | 23099 zinc finger and BTB domain containing 43          |
| GO zinc ion binding | 154 | 1867 | 0.0071938 | 23119 hypermethylated in cancer 2                       |
| GO zinc ion binding | 154 | 1867 | 0.0071938 | 23338 PHD finger protein 15                             |
| GO zinc ion binding | 154 | 1867 | 0.0071938 | 23650 tripartite motif-containing 29                    |
| GO zinc ion binding | 154 | 1867 | 0.0071938 | 23774 bromodomain containing 1                          |
| GO zinc ion binding | 154 | 1867 | 0.0071938 | 2521 fused in sarcoma                                   |
| GO zinc ion binding | 154 | 1867 | 0.0071938 | 255488 ring finger protein 144B                         |
| GO zinc ion binding | 154 | 1867 | 0.0071938 | 256051 zinc finger protein 549                          |
| GO zinc ion binding | 154 | 1867 | 0.0071938 | 25862 ubiquitin specific peptidase 49                   |
| GO zinc ion binding | 154 | 1867 | 0.0071938 | 25946 zinc finger protein 385A                          |
| GO zinc ion binding | 154 | 1867 | 0.0071938 | 2624 GATA binding protein 2                             |
| GO zinc ion binding | 154 | 1867 | 0.0071938 | 26468 LIM homeobox 6                                    |
| GO zinc ion binding | 154 | 1867 | 0.0071938 | 27246 ring finger protein 115                           |
| GO zinc ion binding | 154 | 1867 | 0.0071938 | 27295 PDZ and LIM domain 3                              |
| GO zinc ion binding | 154 | 1867 | 0.0071938 | 2737 GLI family zinc finger 3                           |
| GO zinc ion binding | 154 | 1867 | 0.0071938 | 284346 zinc finger protein 575                          |
| GO zinc ion binding | 154 | 1867 | 0.0071938 | 29116 myosin regulatory light chain interacting protein |
| GO zinc ion binding | 154 | 1867 | 0.0071938 | 3164 nuclear receptor subfamily 4, group A, member 1    |
| GO zinc ion binding | 154 | 1867 | 0.0071938 | 3268 ArfGAP with FG repeats 2                           |
| GO zinc ion binding | 154 | 1867 | 0.0071938 | 342908 zinc finger protein 404                          |
| GO zinc ion binding | 154 | 1867 | 0.0071938 | 345462 zinc finger protein 879                          |
| GO zinc ion binding | 154 | 1867 | 0.0071938 | 376940 zinc finger CCCH-type containing 6               |
| GO zinc ion binding | 154 | 1867 | 0.0071938 | 378925 ring finger protein 148                          |
| GO zinc ion binding | 154 | 1867 | 0.0071938 | 3827 kininogen 1                                        |
| GO zinc ion binding | 154 | 1867 | 0.0071938 | 388536 zinc finger protein 790                          |
| GO zinc ion binding | 154 | 1867 | 0.0071938 | 388558 zinc finger protein 808                          |
| GO zinc ion binding | 154 | 1867 | 0.0071938 | 388567 zinc finger protein 749                          |
| GO zinc ion binding | 154 | 1867 | 0.0071938 | 388591 ring finger protein 207                          |
| GO zinc ion binding | 154 | 1867 | 0.0071938 | 389058 Sp5 transcription factor                         |
| GO zinc ion binding | 154 | 1867 | 0.0071938 | 3983 actin binding LIM protein 1                        |
| GO zinc ion binding | 154 | 1867 | 0.0071938 | 4005 LIM domain only 2 (rhombotin-like 1)               |
| GO zinc ion binding | 154 | 1867 | 0.0071938 | 4007 prickle homolog 3 (Drosophila)                     |
| GO zinc ion binding | 154 | 1867 | 0.0071938 | 400713 zinc finger protein 880                          |
| GO zinc ion binding | 154 | 1867 | 0.0071938 | 4008 LIM domain 7                                       |
| GO zinc ion binding | 154 | 1867 | 0.0071938 | 4194 Mdm4 p53 binding protein homolog (mouse)           |
| GO zinc ion binding | 154 | 1867 | 0.0071938 | 4306 nuclear receptor subfamily 3, group C, member 2    |

|                     |     |      |           |                                                                         |
|---------------------|-----|------|-----------|-------------------------------------------------------------------------|
| GO zinc ion binding | 154 | 1867 | 0.0071938 | 4316 matrix metallopeptidase 7 (matrilysin, uterine)                    |
| GO zinc ion binding | 154 | 1867 | 0.0071938 | 4929 nuclear receptor subfamily 4, group A, member 2                    |
| GO zinc ion binding | 154 | 1867 | 0.0071938 | 5025 purinergic receptor P2X, ligand-gated ion channel, 4               |
| GO zinc ion binding | 154 | 1867 | 0.0071938 | 5071 Parkinson disease (autosomal recessive, juvenile) 2, parkin        |
| GO zinc ion binding | 154 | 1867 | 0.0071938 | 51274 Kruppel-like factor 3 (basic)                                     |
| GO zinc ion binding | 154 | 1867 | 0.0071938 | 51523 CXXC finger 5                                                     |
| GO zinc ion binding | 154 | 1867 | 0.0071938 | 51621 Kruppel-like factor 13                                            |
| GO zinc ion binding | 154 | 1867 | 0.0071938 | 51710 zinc finger protein 44                                            |
| GO zinc ion binding | 154 | 1867 | 0.0071938 | 5325 pleiomorphic adenoma gene-like 1                                   |
| GO zinc ion binding | 154 | 1867 | 0.0071938 | 5371 promyelocytic leukemia                                             |
| GO zinc ion binding | 154 | 1867 | 0.0071938 | 5465 peroxisome proliferator-activated receptor alpha                   |
| GO zinc ion binding | 154 | 1867 | 0.0071938 | 54739 XIAP associated factor 1                                          |
| GO zinc ion binding | 154 | 1867 | 0.0071938 | 54877 zinc finger, CCHC domain containing 2                             |
| GO zinc ion binding | 154 | 1867 | 0.0071938 | 54894 ring finger protein 43                                            |
| GO zinc ion binding | 154 | 1867 | 0.0071938 | 54904 Wolf-Hirschhorn syndrome candidate 1-like 1                       |
| GO zinc ion binding | 154 | 1867 | 0.0071938 | 55184 chromosome 20 open reading frame 12                               |
| GO zinc ion binding | 154 | 1867 | 0.0071938 | 55432 YOD1 OTU deubiquinating enzyme 1 homolog ( <i>S. cerevisiae</i> ) |
| GO zinc ion binding | 154 | 1867 | 0.0071938 | 55616 ArfGAP with SH3 domain, ankyrin repeat and PH domain 3            |
| GO zinc ion binding | 154 | 1867 | 0.0071938 | 55657 zinc finger protein 692                                           |
| GO zinc ion binding | 154 | 1867 | 0.0071938 | 55762 zinc finger protein 701                                           |
| GO zinc ion binding | 154 | 1867 | 0.0071938 | 55769 zinc finger protein 83                                            |
| GO zinc ion binding | 154 | 1867 | 0.0071938 | 55870 ash1 (absent, small, or homeotic)-like ( <i>Drosophila</i> )      |
| GO zinc ion binding | 154 | 1867 | 0.0071938 | 55893 zinc finger protein 395                                           |
| GO zinc ion binding | 154 | 1867 | 0.0071938 | 56547 matrix metallopeptidase 26                                        |
| GO zinc ion binding | 154 | 1867 | 0.0071938 | 56978 PR domain containing 8                                            |
| GO zinc ion binding | 154 | 1867 | 0.0071938 | 57094 carboxypeptidase A6                                               |
| GO zinc ion binding | 154 | 1867 | 0.0071938 | 57379 activation-induced cytidine deaminase                             |
| GO zinc ion binding | 154 | 1867 | 0.0071938 | 57459 GATA zinc finger domain containing 2B                             |
| GO zinc ion binding | 154 | 1867 | 0.0071938 | 57643 zinc finger, SWIM-type containing 5                               |
| GO zinc ion binding | 154 | 1867 | 0.0071938 | 604 B-cell CLL/lymphoma 6                                               |
| GO zinc ion binding | 154 | 1867 | 0.0071938 | 6096 RAR-related orphan receptor B                                      |
| GO zinc ion binding | 154 | 1867 | 0.0071938 | 6097 RAR-related orphan receptor C                                      |
| GO zinc ion binding | 154 | 1867 | 0.0071938 | 6239 ras responsive element binding protein 1                           |
| GO zinc ion binding | 154 | 1867 | 0.0071938 | 6256 retinoid X receptor, alpha                                         |
| GO zinc ion binding | 154 | 1867 | 0.0071938 | 64135 interferon induced with helicase C domain 1                       |
| GO zinc ion binding | 154 | 1867 | 0.0071938 | 6622 synuclein, alpha (non A4 component of amyloid precursor)           |

|                     |     |      |           |                                                                                |
|---------------------|-----|------|-----------|--------------------------------------------------------------------------------|
| GO zinc ion binding | 154 | 1867 | 0.0071938 | 687 Kruppel-like factor 9                                                      |
| GO zinc ion binding | 154 | 1867 | 0.0071938 | 6941 transcription factor 19                                                   |
| GO zinc ion binding | 154 | 1867 | 0.0071938 | 7026 nuclear receptor subfamily 2, group F, member 2                           |
| GO zinc ion binding | 154 | 1867 | 0.0071938 | 7071 Kruppel-like factor 10                                                    |
| GO zinc ion binding | 154 | 1867 | 0.0071938 | 7092 tolloid-like 1                                                            |
| GO zinc ion binding | 154 | 1867 | 0.0071938 | 7227 trichorhinophalangeal syndrome I                                          |
| GO zinc ion binding | 154 | 1867 | 0.0071938 | 7538 zinc finger protein 36, C3H type, homolog (mouse)                         |
| GO zinc ion binding | 154 | 1867 | 0.0071938 | 7546 Zic family member 2 (odd-paired homolog, Drosophila)                      |
| GO zinc ion binding | 154 | 1867 | 0.0071938 | 7565 zinc finger protein 17                                                    |
| GO zinc ion binding | 154 | 1867 | 0.0071938 | 7597 zinc finger and BTB domain containing 25                                  |
| GO zinc ion binding | 154 | 1867 | 0.0071938 | 760 carbonic anhydrase II                                                      |
| GO zinc ion binding | 154 | 1867 | 0.0071938 | 7678 zinc finger protein 124                                                   |
| GO zinc ion binding | 154 | 1867 | 0.0071938 | 7706 tripartite motif-containing 25                                            |
| GO zinc ion binding | 154 | 1867 | 0.0071938 | 771 carbonic anhydrase XII                                                     |
| GO zinc ion binding | 154 | 1867 | 0.0071938 | 79132 DEXH (Asp-Glu-X-His) box polypeptide 58                                  |
| GO zinc ion binding | 154 | 1867 | 0.0071938 | 79444 baculoviral IAP repeat-containing 7                                      |
| GO zinc ion binding | 154 | 1867 | 0.0071938 | 79661 nei endonuclease VIII-like 1 (E. coli)                                   |
| GO zinc ion binding | 154 | 1867 | 0.0071938 | 79673 zinc finger protein 329                                                  |
| GO zinc ion binding | 154 | 1867 | 0.0071938 | 79872 Cas-Br-M (murine) ecotropic retroviral transforming sequence-like 1      |
| GO zinc ion binding | 154 | 1867 | 0.0071938 | 79894 zinc finger protein 672                                                  |
| GO zinc ion binding | 154 | 1867 | 0.0071938 | 8013 nuclear receptor subfamily 4, group A, member 3                           |
| GO zinc ion binding | 154 | 1867 | 0.0071938 | 81603 tripartite motif-containing 8                                            |
| GO zinc ion binding | 154 | 1867 | 0.0071938 | 81844 tripartite motif-containing 56                                           |
| GO zinc ion binding | 154 | 1867 | 0.0071938 | 84124 zinc finger protein 394                                                  |
| GO zinc ion binding | 154 | 1867 | 0.0071938 | 8462 Kruppel-like factor 11                                                    |
| GO zinc ion binding | 154 | 1867 | 0.0071938 | 84858 zinc finger protein 503                                                  |
| GO zinc ion binding | 154 | 1867 | 0.0071938 | 84911 zinc finger protein 382                                                  |
| GO zinc ion binding | 154 | 1867 | 0.0071938 | 85416 Zic family member 5 (odd-paired homolog, Drosophila)                     |
| GO zinc ion binding | 154 | 1867 | 0.0071938 | 8543 LIM domain only 4                                                         |
| GO zinc ion binding | 154 | 1867 | 0.0071938 | 85441 peroxisomal proliferator-activated receptor A interacting complex 285    |
| GO zinc ion binding | 154 | 1867 | 0.0071938 | 862 runt-related transcription factor 1; translocated to, 1 (cyclin D-related) |
| GO zinc ion binding | 154 | 1867 | 0.0071938 | 8751 ADAM metallopeptidase domain 15                                           |
| GO zinc ion binding | 154 | 1867 | 0.0071938 | 8796 sciellin                                                                  |
| GO zinc ion binding | 154 | 1867 | 0.0071938 | 89870 tripartite motif-containing 15                                           |
| GO zinc ion binding | 154 | 1867 | 0.0071938 | 90592 zinc finger protein 700                                                  |
| GO zinc ion binding | 154 | 1867 | 0.0071938 | 92283 zinc finger protein 461                                                  |

|                                        |     |      |           |                                                                           |
|----------------------------------------|-----|------|-----------|---------------------------------------------------------------------------|
| GO zinc ion binding                    | 154 | 1867 | 0.0071938 | 92822 zinc finger protein 276                                             |
| GO zinc ion binding                    | 154 | 1867 | 0.0071938 | 9314 Kruppel-like factor 4 (gut)                                          |
| GO zinc ion binding                    | 154 | 1867 | 0.0071938 | 93349 SP140 nuclear body protein-like                                     |
| GO zinc ion binding                    | 154 | 1867 | 0.0071938 | 94059 leukocyte receptor cluster (LRC) member 9                           |
| GO zinc ion binding                    | 154 | 1867 | 0.0071938 | 9422 zinc finger protein 264                                              |
| GO zinc ion binding                    | 154 | 1867 | 0.0071938 | 9510 ADAM metallopeptidase with thrombospondin type 1 motif, 1            |
| GO zinc ion binding                    | 154 | 1867 | 0.0071938 | 9572 nuclear receptor subfamily 1, group D, member 1                      |
| GO zinc ion binding                    | 154 | 1867 | 0.0071938 | 9615 guanine deaminase                                                    |
| GO zinc ion binding                    | 154 | 1867 | 0.0071938 | 9971 nuclear receptor subfamily 1, group H, member 4                      |
| GO B cell differentiation              | 7   | 34   | 0.0072127 | 10014 histone deacetylase 5                                               |
| GO B cell differentiation              | 7   | 34   | 0.0072127 | 23529 cardiotrophin-like cytokine factor 1                                |
| GO B cell differentiation              | 7   | 34   | 0.0072127 | 29760 B-cell linker                                                       |
| GO B cell differentiation              | 7   | 34   | 0.0072127 | 3175 one cut homeobox 1                                                   |
| GO B cell differentiation              | 7   | 34   | 0.0072127 | 57379 activation-induced cytidine deaminase                               |
| GO B cell differentiation              | 7   | 34   | 0.0072127 | 604 B-cell CLL/lymphoma 6                                                 |
| GO B cell differentiation              | 7   | 34   | 0.0072127 | 9734 histone deacetylase 9                                                |
| GO palate development                  | 7   | 34   | 0.0072127 | 4087 SMAD family member 2                                                 |
| GO palate development                  | 7   | 34   | 0.0072127 | 4223 mesenchyme homeobox 2                                                |
| GO palate development                  | 7   | 34   | 0.0072127 | 5396 paired related homeobox 1                                            |
| GO palate development                  | 7   | 34   | 0.0072127 | 64651 cysteine-serine-rich nuclear protein 1                              |
| GO palate development                  | 7   | 34   | 0.0072127 | 7049 transforming growth factor, beta receptor III                        |
| GO palate development                  | 7   | 34   | 0.0072127 | 84159 AT rich interactive domain 5B (MRF1-like)                           |
| GO palate development                  | 7   | 34   | 0.0072127 | 91461 protein kinase domain containing, cytoplasmic homolog (mouse)       |
| GO protein amino acid dephosphorylatio | 16  | 120  | 0.0076423 | 10076 protein tyrosine phosphatase, receptor type, U                      |
| GO protein amino acid dephosphorylatio | 16  | 120  | 0.0076423 | 10106 CTD (carboxy-terminal domain, RNA polymerase II, polypeptide A) sma |
| GO protein amino acid dephosphorylatio | 16  | 120  | 0.0076423 | 11156 protein tyrosine phosphatase type IVA, member 3                     |
| GO protein amino acid dephosphorylatio | 16  | 120  | 0.0076423 | 1843 dual specificity phosphatase 1                                       |
| GO protein amino acid dephosphorylatio | 16  | 120  | 0.0076423 | 1844 dual specificity phosphatase 2                                       |
| GO protein amino acid dephosphorylatio | 16  | 120  | 0.0076423 | 1847 dual specificity phosphatase 5                                       |
| GO protein amino acid dephosphorylatio | 16  | 120  | 0.0076423 | 26191 protein tyrosine phosphatase, non-receptor type 22 (lymphoid)       |
| GO protein amino acid dephosphorylatio | 16  | 120  | 0.0076423 | 54961 slingshot homolog 3 (Drosophila)                                    |
| GO protein amino acid dephosphorylatio | 16  | 120  | 0.0076423 | 5774 protein tyrosine phosphatase, non-receptor type 3                    |
| GO protein amino acid dephosphorylatio | 16  | 120  | 0.0076423 | 5787 protein tyrosine phosphatase, receptor type, B                       |
| GO protein amino acid dephosphorylatio | 16  | 120  | 0.0076423 | 5789 protein tyrosine phosphatase, receptor type, D                       |
| GO protein amino acid dephosphorylatio | 16  | 120  | 0.0076423 | 5791 protein tyrosine phosphatase, receptor type, E                       |
| GO protein amino acid dephosphorylatio | 16  | 120  | 0.0076423 | 5794 protein tyrosine phosphatase, receptor type, H                       |

|                                         |    |     |           |                                                                           |
|-----------------------------------------|----|-----|-----------|---------------------------------------------------------------------------|
| GO protein amino acid dephosphorylation | 16 | 120 | 0.0076423 | 5799 protein tyrosine phosphatase, receptor type, N polypeptide 2         |
| GO protein amino acid dephosphorylation | 16 | 120 | 0.0076423 | 5801 protein tyrosine phosphatase, receptor type, R                       |
| GO protein amino acid dephosphorylation | 16 | 120 | 0.0076423 | 8556 CDC14 cell division cycle 14 homolog A ( <i>S. cerevisiae</i> )      |
| GO leukotriene biosynthetic process     | 5  | 19  | 0.0076729 | 2205 Fc fragment of IgE, high affinity I, receptor for; alpha polypeptide |
| GO leukotriene biosynthetic process     | 5  | 19  | 0.0076729 | 240 arachidonate 5-lipoxygenase                                           |
| GO leukotriene biosynthetic process     | 5  | 19  | 0.0076729 | 4056 leukotriene C4 synthase                                              |
| GO leukotriene biosynthetic process     | 5  | 19  | 0.0076729 | 59344 arachidonate lipoxygenase 3                                         |
| GO leukotriene biosynthetic process     | 5  | 19  | 0.0076729 | 6850 spleen tyrosine kinase                                               |
| GO insulin-like growth factor binding   | 5  | 19  | 0.0076729 | 3484 insulin-like growth factor binding protein 1                         |
| GO insulin-like growth factor binding   | 5  | 19  | 0.0076729 | 3486 insulin-like growth factor binding protein 3                         |
| GO insulin-like growth factor binding   | 5  | 19  | 0.0076729 | 3491 cysteine-rich, angiogenic inducer, 61                                |
| GO insulin-like growth factor binding   | 5  | 19  | 0.0076729 | 4856 nephroblastoma overexpressed gene                                    |
| GO insulin-like growth factor binding   | 5  | 19  | 0.0076729 | 8839 WNT1 inducible signaling pathway protein 2                           |
| GO response to estradiol stimulus       | 10 | 61  | 0.0079369 | 10568 solute carrier family 34 (sodium phosphate), member 2               |
| GO response to estradiol stimulus       | 10 | 61  | 0.0079369 | 10628 thioredoxin interacting protein                                     |
| GO response to estradiol stimulus       | 10 | 61  | 0.0079369 | 1843 dual specificity phosphatase 1                                       |
| GO response to estradiol stimulus       | 10 | 61  | 0.0079369 | 2026 enolase 2 (gamma, neuronal)                                          |
| GO response to estradiol stimulus       | 10 | 61  | 0.0079369 | 3169 forkhead box A1                                                      |
| GO response to estradiol stimulus       | 10 | 61  | 0.0079369 | 3643 insulin receptor                                                     |
| GO response to estradiol stimulus       | 10 | 61  | 0.0079369 | 4886 neuropeptide Y receptor Y1                                           |
| GO response to estradiol stimulus       | 10 | 61  | 0.0079369 | 652 bone morphogenetic protein 4                                          |
| GO response to estradiol stimulus       | 10 | 61  | 0.0079369 | 9021 suppressor of cytokine signaling 3                                   |
| GO response to estradiol stimulus       | 10 | 61  | 0.0079369 | 952 CD38 molecule                                                         |
| GO basement membrane                    | 10 | 61  | 0.0079369 | 1295 collagen, type VIII, alpha 1                                         |
| GO basement membrane                    | 10 | 61  | 0.0079369 | 2200 fibrillin 1                                                          |
| GO basement membrane                    | 10 | 61  | 0.0079369 | 22795 nidogen 2 (osteonidogen)                                            |
| GO basement membrane                    | 10 | 61  | 0.0079369 | 30008 EGF-containing fibulin-like extracellular matrix protein 2          |
| GO basement membrane                    | 10 | 61  | 0.0079369 | 3911 laminin, alpha 5                                                     |
| GO basement membrane                    | 10 | 61  | 0.0079369 | 3913 laminin, beta 2 (laminin S)                                          |
| GO basement membrane                    | 10 | 61  | 0.0079369 | 3914 laminin, beta 3                                                      |
| GO basement membrane                    | 10 | 61  | 0.0079369 | 64093 SPARC related modular calcium binding 1                             |
| GO basement membrane                    | 10 | 61  | 0.0079369 | 83872 hemicentin 1                                                        |
| GO basement membrane                    | 10 | 61  | 0.0079369 | 9510 ADAM metallopeptidase with thrombospondin type 1 motif, 1            |
| GO kidney development                   | 10 | 61  | 0.0079369 | 183 angiotensinogen (serpin peptidase inhibitor, clade A, member 8)       |
| GO kidney development                   | 10 | 61  | 0.0079369 | 2200 fibrillin 1                                                          |
| GO kidney development                   | 10 | 61  | 0.0079369 | 2296 forkhead box C1                                                      |

|                                             |    |     |           |                                                                              |
|---------------------------------------------|----|-----|-----------|------------------------------------------------------------------------------|
| GO kidney development                       | 10 | 61  | 0.0079369 | 255738 proprotein convertase subtilisin/kexin type 9                         |
| GO kidney development                       | 10 | 61  | 0.0079369 | 56913 core 1 synthase, glycoprotein-N-acetylgalactosamine 3-beta-galactosyl  |
| GO kidney development                       | 10 | 61  | 0.0079369 | 5972 renin                                                                   |
| GO kidney development                       | 10 | 61  | 0.0079369 | 652 bone morphogenetic protein 4                                             |
| GO kidney development                       | 10 | 61  | 0.0079369 | 760 carbonic anhydrase II                                                    |
| GO kidney development                       | 10 | 61  | 0.0079369 | 84159 AT rich interactive domain 5B (MRF1-like)                              |
| GO kidney development                       | 10 | 61  | 0.0079369 | 9510 ADAM metalloproteinase with thrombospondin type 1 motif, 1              |
| GO positive regulation of cell proliferatio | 31 | 290 | 0.0089975 | 10312 T-cell, immune regulator 1, ATPase, H+ transporting, lysosomal V0 subu |
| GO positive regulation of cell proliferatio | 31 | 290 | 0.0089975 | 1139 cholinergic receptor, nicotinic, alpha 7                                |
| GO positive regulation of cell proliferatio | 31 | 290 | 0.0089975 | 1435 colony stimulating factor 1 (macrophage)                                |
| GO positive regulation of cell proliferatio | 31 | 290 | 0.0089975 | 154 adrenergic, beta-2-, receptor, surface                                   |
| GO positive regulation of cell proliferatio | 31 | 290 | 0.0089975 | 1803 dipeptidyl-peptidase 4                                                  |
| GO positive regulation of cell proliferatio | 31 | 290 | 0.0089975 | 1906 endothelin 1                                                            |
| GO positive regulation of cell proliferatio | 31 | 290 | 0.0089975 | 2263 fibroblast growth factor receptor 2                                     |
| GO positive regulation of cell proliferatio | 31 | 290 | 0.0089975 | 26281 fibroblast growth factor 20                                            |
| GO positive regulation of cell proliferatio | 31 | 290 | 0.0089975 | 27035 NADPH oxidase 1                                                        |
| GO positive regulation of cell proliferatio | 31 | 290 | 0.0089975 | 28996 homeodomain interacting protein kinase 2                               |
| GO positive regulation of cell proliferatio | 31 | 290 | 0.0089975 | 3142 H2.0-like homeobox                                                      |
| GO positive regulation of cell proliferatio | 31 | 290 | 0.0089975 | 3400 inhibitor of DNA binding 4, dominant negative helix-loop-helix protein  |
| GO positive regulation of cell proliferatio | 31 | 290 | 0.0089975 | 3479 insulin-like growth factor 1 (somatomedin C)                            |
| GO positive regulation of cell proliferatio | 31 | 290 | 0.0089975 | 3569 interleukin 6 (interferon, beta 2)                                      |
| GO positive regulation of cell proliferatio | 31 | 290 | 0.0089975 | 3570 interleukin 6 receptor                                                  |
| GO positive regulation of cell proliferatio | 31 | 290 | 0.0089975 | 3643 insulin receptor                                                        |
| GO positive regulation of cell proliferatio | 31 | 290 | 0.0089975 | 3815 v-kit Hardy-Zuckerman 4 feline sarcoma viral oncogene homolog           |
| GO positive regulation of cell proliferatio | 31 | 290 | 0.0089975 | 3845 v-Ki-ras2 Kirsten rat sarcoma viral oncogene homolog                    |
| GO positive regulation of cell proliferatio | 31 | 290 | 0.0089975 | 412 steroid sulfatase (microsomal), isozyme S                                |
| GO positive regulation of cell proliferatio | 31 | 290 | 0.0089975 | 4194 Mdm4 p53 binding protein homolog (mouse)                                |
| GO positive regulation of cell proliferatio | 31 | 290 | 0.0089975 | 4254 KIT ligand                                                              |
| GO positive regulation of cell proliferatio | 31 | 290 | 0.0089975 | 4486 macrophage stimulating 1 receptor (c-met-related tyrosine kinase)       |
| GO positive regulation of cell proliferatio | 31 | 290 | 0.0089975 | 467 activating transcription factor 3                                        |
| GO positive regulation of cell proliferatio | 31 | 290 | 0.0089975 | 4851 Notch homolog 1, translocation-associated (Drosophila)                  |
| GO positive regulation of cell proliferatio | 31 | 290 | 0.0089975 | 51085 MLX interacting protein-like                                           |
| GO positive regulation of cell proliferatio | 31 | 290 | 0.0089975 | 6374 chemokine (C-X-C motif) ligand 5                                        |
| GO positive regulation of cell proliferatio | 31 | 290 | 0.0089975 | 6489 ST8 alpha-N-acetyl-neuraminide alpha-2,8-sialyltransferase 1            |
| GO positive regulation of cell proliferatio | 31 | 290 | 0.0089975 | 7076 TIMP metalloproteinase inhibitor 1                                      |
| GO positive regulation of cell proliferatio | 31 | 290 | 0.0089975 | 8660 insulin receptor substrate 2                                            |



|    |                                          |    |     |           |                                                                     |
|----|------------------------------------------|----|-----|-----------|---------------------------------------------------------------------|
| GO | positive regulation of cell proliferatio | 31 | 290 | 0.0089975 | 885 cholecystokinin                                                 |
| GO | positive regulation of cell proliferatio | 31 | 290 | 0.0089975 | 961 CD47 molecule                                                   |
| GO | transmembrane receptor protein tyrosi    | 3  | 7   | 0.0090491 | 10076 protein tyrosine phosphatase, receptor type, U                |
| GO | transmembrane receptor protein tyrosi    | 3  | 7   | 0.0090491 | 5789 protein tyrosine phosphatase, receptor type, D                 |
| GO | transmembrane receptor protein tyrosi    | 3  | 7   | 0.0090491 | 5791 protein tyrosine phosphatase, receptor type, E                 |
| GO | negative regulation of smooth muscle     | 3  | 7   | 0.0090491 | 10221 tribbles homolog 1 (Drosophila)                               |
| GO | negative regulation of smooth muscle     | 3  | 7   | 0.0090491 | 3486 insulin-like growth factor binding protein 3                   |
| GO | negative regulation of smooth muscle     | 3  | 7   | 0.0090491 | 3488 insulin-like growth factor binding protein 5                   |
| GO | GTP-Rho binding                          | 3  | 7   | 0.0090491 | 10435 CDC42 effector protein (Rho GTPase binding) 2                 |
| GO | GTP-Rho binding                          | 3  | 7   | 0.0090491 | 11078 TRIO and F-actin binding protein                              |
| GO | GTP-Rho binding                          | 3  | 7   | 0.0090491 | 148170 CDC42 effector protein (Rho GTPase binding) 5                |
| GO | positive regulation of pseudopodium      | 3  | 7   | 0.0090491 | 10435 CDC42 effector protein (Rho GTPase binding) 2                 |
| GO | positive regulation of pseudopodium      | 3  | 7   | 0.0090491 | 148170 CDC42 effector protein (Rho GTPase binding) 5                |
| GO | positive regulation of pseudopodium      | 3  | 7   | 0.0090491 | 3815 v-kit Hardy-Zuckerman 4 feline sarcoma viral oncogene homolog  |
| GO | P granule                                | 3  | 7   | 0.0090491 | 143689 piwi-like 4 (Drosophila)                                     |
| GO | P granule                                | 3  | 7   | 0.0090491 | 55124 piwi-like 2 (Drosophila)                                      |
| GO | P granule                                | 3  | 7   | 0.0090491 | 9271 piwi-like 1 (Drosophila)                                       |
| GO | piRNA metabolic process                  | 3  | 7   | 0.0090491 | 143689 piwi-like 4 (Drosophila)                                     |
| GO | piRNA metabolic process                  | 3  | 7   | 0.0090491 | 55124 piwi-like 2 (Drosophila)                                      |
| GO | piRNA metabolic process                  | 3  | 7   | 0.0090491 | 9271 piwi-like 1 (Drosophila)                                       |
| GO | natriuresis                              | 3  | 7   | 0.0090491 | 1813 dopamine receptor D2                                           |
| GO | natriuresis                              | 3  | 7   | 0.0090491 | 1906 endothelin 1                                                   |
| GO | natriuresis                              | 3  | 7   | 0.0090491 | 3827 kininogen 1                                                    |
| GO | drinking behavior                        | 3  | 7   | 0.0090491 | 183 angiotensinogen (serpin peptidase inhibitor, clade A, member 8) |
| GO | drinking behavior                        | 3  | 7   | 0.0090491 | 5367 pro-melanin-concentrating hormone                              |
| GO | drinking behavior                        | 3  | 7   | 0.0090491 | 5972 renin                                                          |
| GO | regulation of organ growth               | 3  | 7   | 0.0090491 | 2296 forkhead box C1                                                |
| GO | regulation of organ growth               | 3  | 7   | 0.0090491 | 2303 forkhead box C2 (MFH-1, mesenchyme forkhead 1)                 |
| GO | regulation of organ growth               | 3  | 7   | 0.0090491 | 28982 feline leukemia virus subgroup C cellular receptor 1          |
| GO | neurotransmitter biosynthetic proces     | 3  | 7   | 0.0090491 | 2571 glutamate decarboxylase 1 (brain, 67kDa)                       |
| GO | neurotransmitter biosynthetic proces     | 3  | 7   | 0.0090491 | 4842 nitric oxide synthase 1 (neuronal)                             |
| GO | neurotransmitter biosynthetic proces     | 3  | 7   | 0.0090491 | 5053 phenylalanine hydroxylase                                      |
| GO | positive regulation of glycolysis        | 3  | 7   | 0.0090491 | 3479 insulin-like growth factor 1 (somatomedin C)                   |
| GO | positive regulation of glycolysis        | 3  | 7   | 0.0090491 | 3643 insulin receptor                                               |
| GO | positive regulation of glycolysis        | 3  | 7   | 0.0090491 | 51085 MLX interacting protein-like                                  |
| GO | osteoclast differentiation               | 3  | 7   | 0.0090491 | 3726 jun B proto-oncogene                                           |

|                                            |    |     |           |                                                                                |
|--------------------------------------------|----|-----|-----------|--------------------------------------------------------------------------------|
| GO osteoclast differentiation              | 3  | 7   | 0.0090491 | 799 calcitonin receptor                                                        |
| GO osteoclast differentiation              | 3  | 7   | 0.0090491 | 8600 tumor necrosis factor (ligand) superfamily, member 11                     |
| GO positive regulation of fatty acid beta- | 3  | 7   | 0.0090491 | 51703 acyl-CoA synthetase long-chain family member 5                           |
| GO positive regulation of fatty acid beta- | 3  | 7   | 0.0090491 | 5465 peroxisome proliferator-activated receptor alpha                          |
| GO positive regulation of fatty acid beta- | 3  | 7   | 0.0090491 | 8660 insulin receptor substrate 2                                              |
| GO calcium-activated potassium channel     | 4  | 13  | 0.0094275 | 157855 potassium channel, subfamily U, member 1                                |
| GO calcium-activated potassium channel     | 4  | 13  | 0.0094275 | 27345 potassium large conductance calcium-activated channel, subfamily M,      |
| GO calcium-activated potassium channel     | 4  | 13  | 0.0094275 | 343450 potassium channel, subfamily T, member 2                                |
| GO calcium-activated potassium channel     | 4  | 13  | 0.0094275 | 3783 potassium intermediate/small conductance calcium-activated channel,       |
| GO insulin-like growth factor receptor bi  | 4  | 13  | 0.0094275 | 3479 insulin-like growth factor 1 (somatomedin C)                              |
| GO insulin-like growth factor receptor bi  | 4  | 13  | 0.0094275 | 3643 insulin receptor                                                          |
| GO insulin-like growth factor receptor bi  | 4  | 13  | 0.0094275 | 5295 phosphoinositide-3-kinase, regulatory subunit 1 (alpha)                   |
| GO insulin-like growth factor receptor bi  | 4  | 13  | 0.0094275 | 5972 renin                                                                     |
| GO inflammatory response                   | 25 | 222 | 0.0096029 | 10014 histone deacetylase 5                                                    |
| GO inflammatory response                   | 25 | 222 | 0.0096029 | 11343 monoglyceride lipase                                                     |
| GO inflammatory response                   | 25 | 222 | 0.0096029 | 1999 E74-like factor 3 (ets domain transcription factor, epithelial-specific ) |
| GO inflammatory response                   | 25 | 222 | 0.0096029 | 2353 FBJ murine osteosarcoma viral oncogene homolog                            |
| GO inflammatory response                   | 25 | 222 | 0.0096029 | 240 arachidonate 5-lipoxygenase                                                |
| GO inflammatory response                   | 25 | 222 | 0.0096029 | 27035 NADPH oxidase 1                                                          |
| GO inflammatory response                   | 25 | 222 | 0.0096029 | 2921 chemokine (C-X-C motif) ligand 3                                          |
| GO inflammatory response                   | 25 | 222 | 0.0096029 | 29760 B-cell linker                                                            |
| GO inflammatory response                   | 25 | 222 | 0.0096029 | 316 aldehyde oxidase 1                                                         |
| GO inflammatory response                   | 25 | 222 | 0.0096029 | 3569 interleukin 6 (interferon, beta 2)                                        |
| GO inflammatory response                   | 25 | 222 | 0.0096029 | 3689 integrin, beta 2 (complement component 3 receptor 3 and 4 subunit)        |
| GO inflammatory response                   | 25 | 222 | 0.0096029 | 3827 kininogen 1                                                               |
| GO inflammatory response                   | 25 | 222 | 0.0096029 | 4065 lymphocyte antigen 75                                                     |
| GO inflammatory response                   | 25 | 222 | 0.0096029 | 5724 platelet-activating factor receptor                                       |
| GO inflammatory response                   | 25 | 222 | 0.0096029 | 6256 retinoid X receptor, alpha                                                |
| GO inflammatory response                   | 25 | 222 | 0.0096029 | 6372 chemokine (C-X-C motif) ligand 6 (granulocyte chemotactic protein 2)      |
| GO inflammatory response                   | 25 | 222 | 0.0096029 | 64332 nuclear factor of kappa light polypeptide gene enhancer in B-cells inhib |
| GO inflammatory response                   | 25 | 222 | 0.0096029 | 7100 toll-like receptor 5                                                      |
| GO inflammatory response                   | 25 | 222 | 0.0096029 | 718 complement component 3                                                     |
| GO inflammatory response                   | 25 | 222 | 0.0096029 | 7852 chemokine (C-X-C motif) receptor 4                                        |
| GO inflammatory response                   | 25 | 222 | 0.0096029 | 7941 phospholipase A2, group VII (platelet-activating factor acetylhydrolase,  |
| GO inflammatory response                   | 25 | 222 | 0.0096029 | 80833 apolipoprotein L, 3                                                      |
| GO inflammatory response                   | 25 | 222 | 0.0096029 | 929 CD14 molecule                                                              |

|                                         |    |     |           |                                                                              |
|-----------------------------------------|----|-----|-----------|------------------------------------------------------------------------------|
| GO inflammatory response                | 25 | 222 | 0.0096029 | 9435 carbohydrate (N-acetylglucosamine-6-O) sulfotransferase 2               |
| GO inflammatory response                | 25 | 222 | 0.0096029 | 9734 histone deacetylase 9                                                   |
| GO integral to Golgi membrane           | 8  | 45  | 0.0104108 | 166929 sphingomyelin synthase 2                                              |
| GO integral to Golgi membrane           | 8  | 45  | 0.0104108 | 27090 ST6 (alpha-N-acetyl-neuraminy-2,3-beta-galactosyl-1,3)-N-acetylgalact  |
| GO integral to Golgi membrane           | 8  | 45  | 0.0104108 | 53947 alpha 1,4-galactosyltransferase                                        |
| GO integral to Golgi membrane           | 8  | 45  | 0.0104108 | 55808 ST6 (alpha-N-acetyl-neuraminy-2,3-beta-galactosyl-1,3)-N-acetylgalact  |
| GO integral to Golgi membrane           | 8  | 45  | 0.0104108 | 57134 mannosidase, alpha, class 1C, member 1                                 |
| GO integral to Golgi membrane           | 8  | 45  | 0.0104108 | 5768 quiescin Q6 sulfhydryl oxidase 1                                        |
| GO integral to Golgi membrane           | 8  | 45  | 0.0104108 | 6484 ST3 beta-galactoside alpha-2,3-sialyltransferase 4                      |
| GO integral to Golgi membrane           | 8  | 45  | 0.0104108 | 6489 ST8 alpha-N-acetyl-neuraminide alpha-2,8-sialyltransferase 1            |
| GO protein dimerization activity        | 12 | 84  | 0.0115402 | 116071 basic leucine zipper transcription factor, ATF-like 2                 |
| GO protein dimerization activity        | 12 | 84  | 0.0115402 | 1628 D site of albumin promoter (albumin D-box) binding protein              |
| GO protein dimerization activity        | 12 | 84  | 0.0115402 | 2354 FBJ murine osteosarcoma viral oncogene homolog B                        |
| GO protein dimerization activity        | 12 | 84  | 0.0115402 | 3131 hepatic leukemia factor                                                 |
| GO protein dimerization activity        | 12 | 84  | 0.0115402 | 3726 jun B proto-oncogene                                                    |
| GO protein dimerization activity        | 12 | 84  | 0.0115402 | 467 activating transcription factor 3                                        |
| GO protein dimerization activity        | 12 | 84  | 0.0115402 | 4778 nuclear factor (erythroid-derived 2), 45kDa                             |
| GO protein dimerization activity        | 12 | 84  | 0.0115402 | 4783 nuclear factor, interleukin 3 regulated                                 |
| GO protein dimerization activity        | 12 | 84  | 0.0115402 | 7008 thyrotrophic embryonic factor                                           |
| GO protein dimerization activity        | 12 | 84  | 0.0115402 | 7022 transcription factor AP-2 gamma (activating enhancer binding protein 2) |
| GO protein dimerization activity        | 12 | 84  | 0.0115402 | 90993 cAMP responsive element binding protein 3-like 1                       |
| GO protein dimerization activity        | 12 | 84  | 0.0115402 | 9619 ATP-binding cassette, sub-family G (WHITE), member 1                    |
| GO branching morphogenesis of a tube    | 5  | 21  | 0.0119847 | 10253 sprouty homolog 2 (Drosophila)                                         |
| GO branching morphogenesis of a tube    | 5  | 21  | 0.0119847 | 3169 forkhead box A1                                                         |
| GO branching morphogenesis of a tube    | 5  | 21  | 0.0119847 | 3479 insulin-like growth factor 1 (somatomedin C)                            |
| GO branching morphogenesis of a tube    | 5  | 21  | 0.0119847 | 4851 Notch homolog 1, translocation-associated (Drosophila)                  |
| GO branching morphogenesis of a tube    | 5  | 21  | 0.0119847 | 652 bone morphogenetic protein 4                                             |
| GO negative regulation of BMP signaling | 5  | 21  | 0.0119847 | 168667 BMP binding endothelial regulator                                     |
| GO negative regulation of BMP signaling | 5  | 21  | 0.0119847 | 28996 homeodomain interacting protein kinase 2                               |
| GO negative regulation of BMP signaling | 5  | 21  | 0.0119847 | 4851 Notch homolog 1, translocation-associated (Drosophila)                  |
| GO negative regulation of BMP signaling | 5  | 21  | 0.0119847 | 7474 wingless-type MMTV integration site family, member 5A                   |
| GO negative regulation of BMP signaling | 5  | 21  | 0.0119847 | 8646 chordin                                                                 |
| GO induction of apoptosis               | 20 | 170 | 0.01228   | 10081 programmed cell death 7                                                |
| GO induction of apoptosis               | 20 | 170 | 0.01228   | 10116 fem-1 homolog b (C. elegans)                                           |
| GO induction of apoptosis               | 20 | 170 | 0.01228   | 1612 death-associated protein kinase 1                                       |
| GO induction of apoptosis               | 20 | 170 | 0.01228   | 23368 protein phosphatase 1, regulatory (inhibitor) subunit 13B              |

|                                         |    |     |           |                                                                               |
|-----------------------------------------|----|-----|-----------|-------------------------------------------------------------------------------|
| GO induction of apoptosis               | 20 | 170 | 0.01228   | 23604 death-associated protein kinase 2                                       |
| GO induction of apoptosis               | 20 | 170 | 0.01228   | 255738 proprotein convertase subtilisin/kexin type 9                          |
| GO induction of apoptosis               | 20 | 170 | 0.01228   | 29108 PYD and CARD domain containing                                          |
| GO induction of apoptosis               | 20 | 170 | 0.01228   | 3164 nuclear receptor subfamily 4, group A, member 1                          |
| GO induction of apoptosis               | 20 | 170 | 0.01228   | 3604 tumor necrosis factor receptor superfamily, member 9                     |
| GO induction of apoptosis               | 20 | 170 | 0.01228   | 4599 myxovirus (influenza virus) resistance 1, interferon-inducible protein p |
| GO induction of apoptosis               | 20 | 170 | 0.01228   | 4853 Notch homolog 2 (Drosophila)                                             |
| GO induction of apoptosis               | 20 | 170 | 0.01228   | 5325 pleiomorphic adenoma gene-like 1                                         |
| GO induction of apoptosis               | 20 | 170 | 0.01228   | 5371 promyelocytic leukemia                                                   |
| GO induction of apoptosis               | 20 | 170 | 0.01228   | 7097 toll-like receptor 2                                                     |
| GO induction of apoptosis               | 20 | 170 | 0.01228   | 834 caspase 1, apoptosis-related cysteine peptidase (interleukin 1, beta, co  |
| GO induction of apoptosis               | 20 | 170 | 0.01228   | 837 caspase 4, apoptosis-related cysteine peptidase                           |
| GO induction of apoptosis               | 20 | 170 | 0.01228   | 8740 tumor necrosis factor (ligand) superfamily, member 14                    |
| GO induction of apoptosis               | 20 | 170 | 0.01228   | 91 activin A receptor, type IB                                                |
| GO induction of apoptosis               | 20 | 170 | 0.01228   | 9263 serine/threonine kinase 17a                                              |
| GO induction of apoptosis               | 20 | 170 | 0.01228   | 9445 integral membrane protein 2B                                             |
| GO cell fate commitment                 | 6  | 29  | 0.0122817 | 10253 sprouty homolog 2 (Drosophila)                                          |
| GO cell fate commitment                 | 6  | 29  | 0.0122817 | 3175 one cut homeobox 1                                                       |
| GO cell fate commitment                 | 6  | 29  | 0.0122817 | 4087 SMAD family member 2                                                     |
| GO cell fate commitment                 | 6  | 29  | 0.0122817 | 4286 microphthalmia-associated transcription factor                           |
| GO cell fate commitment                 | 6  | 29  | 0.0122817 | 5371 promyelocytic leukemia                                                   |
| GO cell fate commitment                 | 6  | 29  | 0.0122817 | 54361 wingless-type MMTV integration site family, member 4                    |
| GO positive regulation of vasodilation  | 4  | 14  | 0.0124949 | 1080 cystic fibrosis transmembrane conductance regulator (ATP-binding cas     |
| GO positive regulation of vasodilation  | 4  | 14  | 0.0124949 | 1373 carbamoyl-phosphate synthetase 1, mitochondrial                          |
| GO positive regulation of vasodilation  | 4  | 14  | 0.0124949 | 154 adrenergic, beta-2-, receptor, surface                                    |
| GO positive regulation of vasodilation  | 4  | 14  | 0.0124949 | 4842 nitric oxide synthase 1 (neuronal)                                       |
| GO negative regulation of tumor necrosi | 4  | 14  | 0.0124949 | 11213 interleukin-1 receptor-associated kinase 3                              |
| GO negative regulation of tumor necrosi | 4  | 14  | 0.0124949 | 1139 cholinergic receptor, nicotinic, alpha 7                                 |
| GO negative regulation of tumor necrosi | 4  | 14  | 0.0124949 | 64127 nucleotide-binding oligomerization domain containing 2                  |
| GO negative regulation of tumor necrosi | 4  | 14  | 0.0124949 | 7099 toll-like receptor 4                                                     |
| GO cytoskeletal adaptor activity        | 4  | 14  | 0.0124949 | 23092 Rho GTPase activating protein 26                                        |
| GO cytoskeletal adaptor activity        | 4  | 14  | 0.0124949 | 55909 bridging integrator 3                                                   |
| GO cytoskeletal adaptor activity        | 4  | 14  | 0.0124949 | 80115 BAI1-associated protein 2-like 2                                        |
| GO cytoskeletal adaptor activity        | 4  | 14  | 0.0124949 | 9788 metastasis suppressor 1                                                  |
| GO complement activation, alternative p | 4  | 14  | 0.0124949 | 629 complement factor B                                                       |
| GO complement activation, alternative p | 4  | 14  | 0.0124949 | 717 complement component 2                                                    |

|                                            |    |     |           |                                                                                |
|--------------------------------------------|----|-----|-----------|--------------------------------------------------------------------------------|
| GO complement activation, alternative p    | 4  | 14  | 0.0124949 | 718 complement component 3                                                     |
| GO complement activation, alternative p    | 4  | 14  | 0.0124949 | 731 complement component 8, alpha polypeptide                                  |
| GO negative regulation of transcription fi | 25 | 227 | 0.0125139 | 10014 histone deacetylase 5                                                    |
| GO negative regulation of transcription fi | 25 | 227 | 0.0125139 | 10628 thioredoxin interacting protein                                          |
| GO negative regulation of transcription fi | 25 | 227 | 0.0125139 | 116113 forkhead box P4                                                         |
| GO negative regulation of transcription fi | 25 | 227 | 0.0125139 | 127343 diencephalon/mesencephalon homeobox 1                                   |
| GO negative regulation of transcription fi | 25 | 227 | 0.0125139 | 150094 salt-inducible kinase 1                                                 |
| GO negative regulation of transcription fi | 25 | 227 | 0.0125139 | 1822 atrophin 1                                                                |
| GO negative regulation of transcription fi | 25 | 227 | 0.0125139 | 1958 early growth response 1                                                   |
| GO negative regulation of transcription fi | 25 | 227 | 0.0125139 | 2117 ets variant 3                                                             |
| GO negative regulation of transcription fi | 25 | 227 | 0.0125139 | 2354 FBJ murine osteosarcoma viral oncogene homolog B                          |
| GO negative regulation of transcription fi | 25 | 227 | 0.0125139 | 2737 GLI family zinc finger 3                                                  |
| GO negative regulation of transcription fi | 25 | 227 | 0.0125139 | 28996 homeodomain interacting protein kinase 2                                 |
| GO negative regulation of transcription fi | 25 | 227 | 0.0125139 | 3169 forkhead box A1                                                           |
| GO negative regulation of transcription fi | 25 | 227 | 0.0125139 | 3665 interferon regulatory factor 7                                            |
| GO negative regulation of transcription fi | 25 | 227 | 0.0125139 | 4194 Mdm4 p53 binding protein homolog (mouse)                                  |
| GO negative regulation of transcription fi | 25 | 227 | 0.0125139 | 4204 methyl CpG binding protein 2 (Rett syndrome)                              |
| GO negative regulation of transcription fi | 25 | 227 | 0.0125139 | 4212 Meis homeobox 2                                                           |
| GO negative regulation of transcription fi | 25 | 227 | 0.0125139 | 51085 MLX interacting protein-like                                             |
| GO negative regulation of transcription fi | 25 | 227 | 0.0125139 | 5396 paired related homeobox 1                                                 |
| GO negative regulation of transcription fi | 25 | 227 | 0.0125139 | 604 B-cell CLL/lymphoma 6                                                      |
| GO negative regulation of transcription fi | 25 | 227 | 0.0125139 | 7026 nuclear receptor subfamily 2, group F, member 2                           |
| GO negative regulation of transcription fi | 25 | 227 | 0.0125139 | 7071 Kruppel-like factor 10                                                    |
| GO negative regulation of transcription fi | 25 | 227 | 0.0125139 | 8462 Kruppel-like factor 11                                                    |
| GO negative regulation of transcription fi | 25 | 227 | 0.0125139 | 8531 cold shock domain protein A                                               |
| GO negative regulation of transcription fi | 25 | 227 | 0.0125139 | 9734 histone deacetylase 9                                                     |
| GO negative regulation of transcription fi | 25 | 227 | 0.0125139 | 9971 nuclear receptor subfamily 1, group H, member 4                           |
| GO transcription activator activity        | 25 | 227 | 0.0125139 | 1785 dynamin 2                                                                 |
| GO transcription activator activity        | 25 | 227 | 0.0125139 | 1958 early growth response 1                                                   |
| GO transcription activator activity        | 25 | 227 | 0.0125139 | 1999 E74-like factor 3 (ets domain transcription factor, epithelial-specific ) |
| GO transcription activator activity        | 25 | 227 | 0.0125139 | 222546 regulatory factor X, 6                                                  |
| GO transcription activator activity        | 25 | 227 | 0.0125139 | 22807 IKAROS family zinc finger 2 (Helios)                                     |
| GO transcription activator activity        | 25 | 227 | 0.0125139 | 2296 forkhead box C1                                                           |
| GO transcription activator activity        | 25 | 227 | 0.0125139 | 2303 forkhead box C2 (MFH-1, mesenchyme forkhead 1)                            |
| GO transcription activator activity        | 25 | 227 | 0.0125139 | 3164 nuclear receptor subfamily 4, group A, member 1                           |
| GO transcription activator activity        | 25 | 227 | 0.0125139 | 3175 one cut homeobox 1                                                        |

|                                     |    |     |           |                                                                                |
|-------------------------------------|----|-----|-----------|--------------------------------------------------------------------------------|
| GO transcription activator activity | 25 | 227 | 0.0125139 | 3725 jun oncogene                                                              |
| GO transcription activator activity | 25 | 227 | 0.0125139 | 4087 SMAD family member 2                                                      |
| GO transcription activator activity | 25 | 227 | 0.0125139 | 4209 myocyte enhancer factor 2D                                                |
| GO transcription activator activity | 25 | 227 | 0.0125139 | 4286 microphthalmia-associated transcription factor                            |
| GO transcription activator activity | 25 | 227 | 0.0125139 | 4851 Notch homolog 1, translocation-associated (Drosophila)                    |
| GO transcription activator activity | 25 | 227 | 0.0125139 | 4929 nuclear receptor subfamily 4, group A, member 2                           |
| GO transcription activator activity | 25 | 227 | 0.0125139 | 51085 MLX interacting protein-like                                             |
| GO transcription activator activity | 25 | 227 | 0.0125139 | 5465 peroxisome proliferator-activated receptor alpha                          |
| GO transcription activator activity | 25 | 227 | 0.0125139 | 55810 forkhead box J2                                                          |
| GO transcription activator activity | 25 | 227 | 0.0125139 | 6239 ras responsive element binding protein 1                                  |
| GO transcription activator activity | 25 | 227 | 0.0125139 | 652 bone morphogenetic protein 4                                               |
| GO transcription activator activity | 25 | 227 | 0.0125139 | 7026 nuclear receptor subfamily 2, group F, member 2                           |
| GO transcription activator activity | 25 | 227 | 0.0125139 | 8013 nuclear receptor subfamily 4, group A, member 3                           |
| GO transcription activator activity | 25 | 227 | 0.0125139 | 80714 pre-B-cell leukemia homeobox 4                                           |
| GO transcription activator activity | 25 | 227 | 0.0125139 | 8631 src kinase associated phosphoprotein 1                                    |
| GO transcription activator activity | 25 | 227 | 0.0125139 | 9314 Kruppel-like factor 4 (gut)                                               |
| GO epidermis development            | 11 | 75  | 0.0126188 | 10481 homeobox B13                                                             |
| GO epidermis development            | 11 | 75  | 0.0126188 | 10913 ectodysplasin A receptor                                                 |
| GO epidermis development            | 11 | 75  | 0.0126188 | 1382 cellular retinoic acid binding protein 2                                  |
| GO epidermis development            | 11 | 75  | 0.0126188 | 1999 E74-like factor 3 (ets domain transcription factor, epithelial-specific ) |
| GO epidermis development            | 11 | 75  | 0.0126188 | 3914 laminin, beta 3                                                           |
| GO epidermis development            | 11 | 75  | 0.0126188 | 412 steroid sulfatase (microsomal), isozyme S                                  |
| GO epidermis development            | 11 | 75  | 0.0126188 | 4851 Notch homolog 1, translocation-associated (Drosophila)                    |
| GO epidermis development            | 11 | 75  | 0.0126188 | 5351 procollagen-lysine 1, 2-oxoglutarate 5-dioxygenase 1                      |
| GO epidermis development            | 11 | 75  | 0.0126188 | 5465 peroxisome proliferator-activated receptor alpha                          |
| GO epidermis development            | 11 | 75  | 0.0126188 | 6706 small proline-rich protein 2G                                             |
| GO epidermis development            | 11 | 75  | 0.0126188 | 8796 sciellin                                                                  |
| GO double-stranded DNA binding      | 11 | 75  | 0.0126188 | 1958 early growth response 1                                                   |
| GO double-stranded DNA binding      | 11 | 75  | 0.0126188 | 2353 FBJ murine osteosarcoma viral oncogene homolog                            |
| GO double-stranded DNA binding      | 11 | 75  | 0.0126188 | 3131 hepatic leukemia factor                                                   |
| GO double-stranded DNA binding      | 11 | 75  | 0.0126188 | 3428 interferon, gamma-inducible protein 16                                    |
| GO double-stranded DNA binding      | 11 | 75  | 0.0126188 | 3725 jun oncogene                                                              |
| GO double-stranded DNA binding      | 11 | 75  | 0.0126188 | 3726 jun B proto-oncogene                                                      |
| GO double-stranded DNA binding      | 11 | 75  | 0.0126188 | 4087 SMAD family member 2                                                      |
| GO double-stranded DNA binding      | 11 | 75  | 0.0126188 | 429 achaete-scute complex homolog 1 (Drosophila)                               |
| GO double-stranded DNA binding      | 11 | 75  | 0.0126188 | 6256 retinoid X receptor, alpha                                                |

|                                   |    |     |           |                                                                                    |
|-----------------------------------|----|-----|-----------|------------------------------------------------------------------------------------|
| GO double-stranded DNA binding    | 11 | 75  | 0.0126188 | 8531 cold shock domain protein A                                                   |
| GO double-stranded DNA binding    | 11 | 75  | 0.0126188 | 9971 nuclear receptor subfamily 1, group H, member 4                               |
| GO axon                           | 16 | 127 | 0.0128948 | 127933 U2AF homology motif (UHM) kinase 1                                          |
| GO axon                           | 16 | 127 | 0.0128948 | 154 adrenergic, beta-2-, receptor, surface                                         |
| GO axon                           | 16 | 127 | 0.0128948 | 1813 dopamine receptor D2                                                          |
| GO axon                           | 16 | 127 | 0.0128948 | 2571 glutamate decarboxylase 1 (brain, 67kDa)                                      |
| GO axon                           | 16 | 127 | 0.0128948 | 27242 tumor necrosis factor receptor superfamily, member 21                        |
| GO axon                           | 16 | 127 | 0.0128948 | 2911 glutamate receptor, metabotropic 1                                            |
| GO axon                           | 16 | 127 | 0.0128948 | 3709 inositol 1,4,5-triphosphate receptor, type 2                                  |
| GO axon                           | 16 | 127 | 0.0128948 | 4684 neural cell adhesion molecule 1                                               |
| GO axon                           | 16 | 127 | 0.0128948 | 4856 neuroblastoma overexpressed gene                                              |
| GO axon                           | 16 | 127 | 0.0128948 | 4886 neuropeptide Y receptor Y1                                                    |
| GO axon                           | 16 | 127 | 0.0128948 | 5025 purinergic receptor P2X, ligand-gated ion channel, 4                          |
| GO axon                           | 16 | 127 | 0.0128948 | 6256 retinoid X receptor, alpha                                                    |
| GO axon                           | 16 | 127 | 0.0128948 | 6622 synuclein, alpha (non A4 component of amyloid precursor)                      |
| GO axon                           | 16 | 127 | 0.0128948 | 760 carbonic anhydrase II                                                          |
| GO axon                           | 16 | 127 | 0.0128948 | 799 calcitonin receptor                                                            |
| GO axon                           | 16 | 127 | 0.0128948 | 885 cholecystokinin                                                                |
| GO endoplasmic reticulum membrane | 49 | 518 | 0.013107  | 10162 lysophosphatidylcholine acyltransferase 3                                    |
| GO endoplasmic reticulum membrane | 49 | 518 | 0.013107  | 10170 dehydrogenase/reductase (SDR family) member 9                                |
| GO endoplasmic reticulum membrane | 49 | 518 | 0.013107  | 10282 blocked early in transport 1 homolog ( <i>S. cerevisiae</i> )                |
| GO endoplasmic reticulum membrane | 49 | 518 | 0.013107  | 10335 murine retrovirus integration site 1 homolog                                 |
| GO endoplasmic reticulum membrane | 49 | 518 | 0.013107  | 11322 transmembrane channel-like 6                                                 |
| GO endoplasmic reticulum membrane | 49 | 518 | 0.013107  | 118429 anthrax toxin receptor 2                                                    |
| GO endoplasmic reticulum membrane | 49 | 518 | 0.013107  | 123099 degenerative spermatocyte homolog 2, lipid desaturase ( <i>Drosophila</i> ) |
| GO endoplasmic reticulum membrane | 49 | 518 | 0.013107  | 130367 sphingosine-1-phosphate phosphatase 2                                       |
| GO endoplasmic reticulum membrane | 49 | 518 | 0.013107  | 147138 transmembrane channel-like 8                                                |
| GO endoplasmic reticulum membrane | 49 | 518 | 0.013107  | 1558 cytochrome P450, family 2, subfamily C, polypeptide 8                         |
| GO endoplasmic reticulum membrane | 49 | 518 | 0.013107  | 1559 cytochrome P450, family 2, subfamily C, polypeptide 9                         |
| GO endoplasmic reticulum membrane | 49 | 518 | 0.013107  | 1571 cytochrome P450, family 2, subfamily E, polypeptide 1                         |
| GO endoplasmic reticulum membrane | 49 | 518 | 0.013107  | 157506 retinol dehydrogenase 10 (all-trans)                                        |
| GO endoplasmic reticulum membrane | 49 | 518 | 0.013107  | 1577 cytochrome P450, family 3, subfamily A, polypeptide 5                         |
| GO endoplasmic reticulum membrane | 49 | 518 | 0.013107  | 163590 torsin A interacting protein 2                                              |
| GO endoplasmic reticulum membrane | 49 | 518 | 0.013107  | 165679 chromosome 3 open reading frame 57                                          |
| GO endoplasmic reticulum membrane | 49 | 518 | 0.013107  | 195814 short chain dehydrogenase/reductase family 16C, member 5                    |
| GO endoplasmic reticulum membrane | 49 | 518 | 0.013107  | 2055 ceroid-lipofuscinosis, neuronal 8 (epilepsy, progressive with mental ret      |

|    |                                       |    |     |           |                                                                           |
|----|---------------------------------------|----|-----|-----------|---------------------------------------------------------------------------|
| GO | endoplasmic reticulum membrane        | 49 | 518 | 0.013107  | 2182 acyl-CoA synthetase long-chain family member 4                       |
| GO | endoplasmic reticulum membrane        | 49 | 518 | 0.013107  | 23780 apolipoprotein L, 2                                                 |
| GO | endoplasmic reticulum membrane        | 49 | 518 | 0.013107  | 256987 serine incorporator 5                                              |
| GO | endoplasmic reticulum membrane        | 49 | 518 | 0.013107  | 25956 SEC31 homolog B ( <i>S. cerevisiae</i> )                            |
| GO | endoplasmic reticulum membrane        | 49 | 518 | 0.013107  | 2861 G protein-coupled receptor 37 (endothelin receptor type B-like)      |
| GO | endoplasmic reticulum membrane        | 49 | 518 | 0.013107  | 3294 hydroxysteroid (17-beta) dehydrogenase 2                             |
| GO | endoplasmic reticulum membrane        | 49 | 518 | 0.013107  | 3601 interleukin 15 receptor, alpha                                       |
| GO | endoplasmic reticulum membrane        | 49 | 518 | 0.013107  | 375056 melanoma inhibitory activity family, member 3                      |
| GO | endoplasmic reticulum membrane        | 49 | 518 | 0.013107  | 387923 stress-associated endoplasmic reticulum protein family member 2    |
| GO | endoplasmic reticulum membrane        | 49 | 518 | 0.013107  | 4056 leukotriene C4 synthase                                              |
| GO | endoplasmic reticulum membrane        | 49 | 518 | 0.013107  | 405753 dual oxidase maturation factor 2                                   |
| GO | endoplasmic reticulum membrane        | 49 | 518 | 0.013107  | 412 steroid sulfatase (microsomal), isozyme S                             |
| GO | endoplasmic reticulum membrane        | 49 | 518 | 0.013107  | 4306 nuclear receptor subfamily 3, group C, member 2                      |
| GO | endoplasmic reticulum membrane        | 49 | 518 | 0.013107  | 51703 acyl-CoA synthetase long-chain family member 5                      |
| GO | endoplasmic reticulum membrane        | 49 | 518 | 0.013107  | 54681 prolyl 4-hydroxylase, transmembrane (endoplasmic reticulum)         |
| GO | endoplasmic reticulum membrane        | 49 | 518 | 0.013107  | 54894 ring finger protein 43                                              |
| GO | endoplasmic reticulum membrane        | 49 | 518 | 0.013107  | 54947 lysophosphatidylcholine acyltransferase 2                           |
| GO | endoplasmic reticulum membrane        | 49 | 518 | 0.013107  | 55080 TAP binding protein-like                                            |
| GO | endoplasmic reticulum membrane        | 49 | 518 | 0.013107  | 55304 serine palmitoyltransferase, long chain base subunit 3              |
| GO | endoplasmic reticulum membrane        | 49 | 518 | 0.013107  | 56605 ERO1-like beta ( <i>S. cerevisiae</i> )                             |
| GO | endoplasmic reticulum membrane        | 49 | 518 | 0.013107  | 5742 prostaglandin-endoperoxide synthase 1 (prostaglandin G/H synthase a) |
| GO | endoplasmic reticulum membrane        | 49 | 518 | 0.013107  | 57620 stromal interaction molecule 2                                      |
| GO | endoplasmic reticulum membrane        | 49 | 518 | 0.013107  | 6238 ribosome binding protein 1 homolog 180kDa (dog)                      |
| GO | endoplasmic reticulum membrane        | 49 | 518 | 0.013107  | 64699 transmembrane protease, serine 3                                    |
| GO | endoplasmic reticulum membrane        | 49 | 518 | 0.013107  | 7098 toll-like receptor 3                                                 |
| GO | endoplasmic reticulum membrane        | 49 | 518 | 0.013107  | 79152 fatty acid 2-hydroxylase                                            |
| GO | endoplasmic reticulum membrane        | 49 | 518 | 0.013107  | 79956 endoplasmic reticulum metalloproteinase 1                           |
| GO | endoplasmic reticulum membrane        | 49 | 518 | 0.013107  | 84879 major facilitator superfamily domain containing 2A                  |
| GO | endoplasmic reticulum membrane        | 49 | 518 | 0.013107  | 89866 SEC16 homolog B ( <i>S. cerevisiae</i> )                            |
| GO | endoplasmic reticulum membrane        | 49 | 518 | 0.013107  | 90993 cAMP responsive element binding protein 3-like 1                    |
| GO | endoplasmic reticulum membrane        | 49 | 518 | 0.013107  | 9619 ATP-binding cassette, sub-family G (WHITE), member 1                 |
| GO | regulation of potassium ion transport | 2  | 3   | 0.0133672 | 10008 potassium voltage-gated channel, Isk-related family, member 3       |
| GO | regulation of potassium ion transport | 2  | 3   | 0.0133672 | 1813 dopamine receptor D2                                                 |
| GO | homotypic cell-cell adhesion          | 2  | 3   | 0.0133672 | 10076 protein tyrosine phosphatase, receptor type, U                      |
| GO | homotypic cell-cell adhesion          | 2  | 3   | 0.0133672 | 4684 neural cell adhesion molecule 1                                      |
| GO | negative regulation of lipopolysaccha | 2  | 3   | 0.0133672 | 10221 tribbles homolog 1 ( <i>Drosophila</i> )                            |



|    |                                         |   |   |           |                                                                             |
|----|-----------------------------------------|---|---|-----------|-----------------------------------------------------------------------------|
| GO | negative regulation of lipopolysaccha   | 2 | 3 | 0.0133672 | 7001 peroxiredoxin 2                                                        |
| GO | regulation of MAP kinase activity       | 2 | 3 | 0.0133672 | 10221 tribbles homolog 1 (Drosophila)                                       |
| GO | regulation of MAP kinase activity       | 2 | 3 | 0.0133672 | 28951 tribbles homolog 2 (Drosophila)                                       |
| GO | ubiquitin-protein ligase regulator acti | 2 | 3 | 0.0133672 | 10221 tribbles homolog 1 (Drosophila)                                       |
| GO | ubiquitin-protein ligase regulator acti | 2 | 3 | 0.0133672 | 28951 tribbles homolog 2 (Drosophila)                                       |
| GO | activin receptor complex                | 2 | 3 | 0.0133672 | 130399 activin A receptor, type IC                                          |
| GO | activin receptor complex                | 2 | 3 | 0.0133672 | 91 activin A receptor, type IB                                              |
| GO | dense core granule                      | 2 | 3 | 0.0133672 | 143425 synaptotagmin IX                                                     |
| GO | dense core granule                      | 2 | 3 | 0.0133672 | 6857 synaptotagmin I                                                        |
| GO | positive regulation of monocyte diffe   | 2 | 3 | 0.0133672 | 1435 colony stimulating factor 1 (macrophage)                               |
| GO | positive regulation of monocyte diffe   | 2 | 3 | 0.0133672 | 3725 jun oncogene                                                           |
| GO | negative regulation of extracellular m  | 2 | 3 | 0.0133672 | 1471 cystatin C                                                             |
| GO | negative regulation of extracellular m  | 2 | 3 | 0.0133672 | 1803 dipeptidyl-peptidase 4                                                 |
| GO | endothelial cell activation             | 2 | 3 | 0.0133672 | 168667 BMP binding endothelial regulator                                    |
| GO | endothelial cell activation             | 2 | 3 | 0.0133672 | 5025 purinergic receptor P2X, ligand-gated ion channel, 4                   |
| GO | regulation of pathway-restricted SMA    | 2 | 3 | 0.0133672 | 168667 BMP binding endothelial regulator                                    |
| GO | regulation of pathway-restricted SMA    | 2 | 3 | 0.0133672 | 652 bone morphogenetic protein 4                                            |
| GO | dopamine receptor activity, coupled w   | 2 | 3 | 0.0133672 | 1813 dopamine receptor D2                                                   |
| GO | dopamine receptor activity, coupled w   | 2 | 3 | 0.0133672 | 1815 dopamine receptor D4                                                   |
| GO | response to histamine                   | 2 | 3 | 0.0133672 | 1813 dopamine receptor D2                                                   |
| GO | response to histamine                   | 2 | 3 | 0.0133672 | 1815 dopamine receptor D4                                                   |
| GO | nitric oxide transport                  | 2 | 3 | 0.0133672 | 1906 endothelin 1                                                           |
| GO | nitric oxide transport                  | 2 | 3 | 0.0133672 | 358 aquaporin 1 (Colton blood group)                                        |
| GO | positive regulation of sarcomere orga   | 2 | 3 | 0.0133672 | 1906 endothelin 1                                                           |
| GO | positive regulation of sarcomere orga   | 2 | 3 | 0.0133672 | 2033 E1A binding protein p300                                               |
| GO | brain segmentation                      | 2 | 3 | 0.0133672 | 1959 early growth response 2                                                |
| GO | brain segmentation                      | 2 | 3 | 0.0133672 | 9935 v-maf musculoaponeurotic fibrosarcoma oncogene homolog B (avian)       |
| GO | positive regulation of granulocyte ma   | 2 | 3 | 0.0133672 | 2205 Fc fragment of IgE, high affinity I, receptor for; alpha polypeptide   |
| GO | positive regulation of granulocyte ma   | 2 | 3 | 0.0133672 | 6850 spleen tyrosine kinase                                                 |
| GO | negative regulation of low-density lip  | 2 | 3 | 0.0133672 | 255738 proprotein convertase subtilisin/kexin type 9                        |
| GO | negative regulation of low-density lip  | 2 | 3 | 0.0133672 | 29116 myosin regulatory light chain interacting protein                     |
| GO | glutamate decarboxylase activity        | 2 | 3 | 0.0133672 | 2571 glutamate decarboxylase 1 (brain, 67kDa)                               |
| GO | glutamate decarboxylase activity        | 2 | 3 | 0.0133672 | 2752 glutamate-ammonia ligase (glutamine synthetase)                        |
| GO | cerebral cortex neuron differentiatio   | 2 | 3 | 0.0133672 | 26468 LIM homeobox 6                                                        |
| GO | cerebral cortex neuron differentiatio   | 2 | 3 | 0.0133672 | 3400 inhibitor of DNA binding 4, dominant negative helix-loop-helix protein |
| GO | negative regulation of T-helper 2 cell  | 2 | 3 | 0.0133672 | 3142 H2.0-like homeobox                                                     |

|    |                                        |   |   |           |                                                                                |
|----|----------------------------------------|---|---|-----------|--------------------------------------------------------------------------------|
| GO | negative regulation of T-helper 2 cell | 2 | 3 | 0.0133672 | 604 B-cell CLL/lymphoma 6                                                      |
| GO | interleukin-6 receptor complex         | 2 | 3 | 0.0133672 | 3569 interleukin 6 (interferon, beta 2)                                        |
| GO | interleukin-6 receptor complex         | 2 | 3 | 0.0133672 | 3570 interleukin 6 receptor                                                    |
| GO | interleukin-6-mediated signaling path  | 2 | 3 | 0.0133672 | 3569 interleukin 6 (interferon, beta 2)                                        |
| GO | interleukin-6-mediated signaling path  | 2 | 3 | 0.0133672 | 3570 interleukin 6 receptor                                                    |
| GO | germ cell programmed cell death        | 2 | 3 | 0.0133672 | 3815 v-kit Hardy-Zuckerman 4 feline sarcoma viral oncogene homolog             |
| GO | germ cell programmed cell death        | 2 | 3 | 0.0133672 | 4254 KIT ligand                                                                |
| GO | laminin-11 complex                     | 2 | 3 | 0.0133672 | 3911 laminin, alpha 5                                                          |
| GO | laminin-11 complex                     | 2 | 3 | 0.0133672 | 3913 laminin, beta 2 (laminin 5)                                               |
| GO | protein-lysine 6-oxidase activity      | 2 | 3 | 0.0133672 | 4015 lysyl oxidase                                                             |
| GO | protein-lysine 6-oxidase activity      | 2 | 3 | 0.0133672 | 84171 lysyl oxidase-like 4                                                     |
| GO | common-partner SMAD protein phos       | 2 | 3 | 0.0133672 | 4087 SMAD family member 2                                                      |
| GO | common-partner SMAD protein phos       | 2 | 3 | 0.0133672 | 5371 promyelocytic leukemia                                                    |
| GO | positive regulation of keratinocyte di | 2 | 3 | 0.0133672 | 4851 Notch homolog 1, translocation-associated (Drosophila)                    |
| GO | positive regulation of keratinocyte di | 2 | 3 | 0.0133672 | 50604 interleukin 20                                                           |
| GO | pancreatic polypeptide receptor activ  | 2 | 3 | 0.0133672 | 4886 neuropeptide Y receptor Y1                                                |
| GO | pancreatic polypeptide receptor activ  | 2 | 3 | 0.0133672 | 4889 neuropeptide Y receptor Y5                                                |
| GO | xenobiotic-transporting ATPase activi  | 2 | 3 | 0.0133672 | 5243 ATP-binding cassette, sub-family B (MDR/TAP), member 1                    |
| GO | xenobiotic-transporting ATPase activi  | 2 | 3 | 0.0133672 | 5244 ATP-binding cassette, sub-family B (MDR/TAP), member 4                    |
| GO | negative regulation of B cell apoptosi | 2 | 3 | 0.0133672 | 604 B-cell CLL/lymphoma 6                                                      |
| GO | negative regulation of B cell apoptosi | 2 | 3 | 0.0133672 | 8660 insulin receptor substrate 2                                              |
| GO | negative regulation of T-helper 2 type | 2 | 3 | 0.0133672 | 604 B-cell CLL/lymphoma 6                                                      |
| GO | negative regulation of T-helper 2 type | 2 | 3 | 0.0133672 | 6778 signal transducer and activator of transcription 6, interleukin-4 inducec |
| GO | negative regulation of prostatic bud f | 2 | 3 | 0.0133672 | 652 bone morphogenetic protein 4                                               |
| GO | negative regulation of prostatic bud f | 2 | 3 | 0.0133672 | 7474 wingless-type MMTV integration site family, member 5A                     |
| GO | microglial cell activation             | 2 | 3 | 0.0133672 | 6622 synuclein, alpha (non A4 component of amyloid precursor)                  |
| GO | microglial cell activation             | 2 | 3 | 0.0133672 | 834 caspase 1, apoptosis-related cysteine peptidase (interleukin 1, beta, co   |
| GO | cellular response to lipoteichoic acid | 2 | 3 | 0.0133672 | 7097 toll-like receptor 2                                                      |
| GO | cellular response to lipoteichoic acid | 2 | 3 | 0.0133672 | 929 CD14 molecule                                                              |
| GO | low voltage-gated calcium channel ac   | 2 | 3 | 0.0133672 | 8911 calcium channel, voltage-dependent, T type, alpha 1I subunit              |
| GO | low voltage-gated calcium channel ac   | 2 | 3 | 0.0133672 | 8912 calcium channel, voltage-dependent, T type, alpha 1H subunit              |
| GO | regulation of protein binding          | 3 | 8 | 0.0137487 | 10014 histone deacetylase 5                                                    |
| GO | regulation of protein binding          | 3 | 8 | 0.0137487 | 26119 low density lipoprotein receptor adaptor protein 1                       |
| GO | regulation of protein binding          | 3 | 8 | 0.0137487 | 6604 SWI/SNF related, matrix associated, actin dependent regulator of chrom    |
| GO | positive regulation of SMAD protein r  | 3 | 8 | 0.0137487 | 11030 RNA binding protein with multiple splicing                               |
| GO | positive regulation of SMAD protein r  | 3 | 8 | 0.0137487 | 5460 POU class 5 homeobox 1                                                    |

|                                           |    |    |           |                                                                         |
|-------------------------------------------|----|----|-----------|-------------------------------------------------------------------------|
| GO positive regulation of SMAD protein r  | 3  | 8  | 0.0137487 | 652 bone morphogenetic protein 4                                        |
| GO regulation of ossification             | 3  | 8  | 0.0137487 | 1435 colony stimulating factor 1 (macrophage)                           |
| GO regulation of ossification             | 3  | 8  | 0.0137487 | 1959 early growth response 2                                            |
| GO regulation of ossification             | 3  | 8  | 0.0137487 | 5734 prostaglandin E receptor 4 (subtype EP4)                           |
| GO negative regulation of calcium ion tra | 3  | 8  | 0.0137487 | 154 adrenergic, beta-2-, receptor, surface                              |
| GO negative regulation of calcium ion tra | 3  | 8  | 0.0137487 | 1813 dopamine receptor D2                                               |
| GO negative regulation of calcium ion tra | 3  | 8  | 0.0137487 | 1815 dopamine receptor D4                                               |
| GO oxidative demethylation                | 3  | 8  | 0.0137487 | 1558 cytochrome P450, family 2, subfamily C, polypeptide 8              |
| GO oxidative demethylation                | 3  | 8  | 0.0137487 | 1559 cytochrome P450, family 2, subfamily C, polypeptide 9              |
| GO oxidative demethylation                | 3  | 8  | 0.0137487 | 1577 cytochrome P450, family 3, subfamily A, polypeptide 5              |
| GO retinal metabolic process              | 3  | 8  | 0.0137487 | 157506 retinol dehydrogenase 10 (all-trans)                             |
| GO retinal metabolic process              | 3  | 8  | 0.0137487 | 195814 short chain dehydrogenase/reductase family 16C, member 5         |
| GO retinal metabolic process              | 3  | 8  | 0.0137487 | 5950 retinol binding protein 4, plasma                                  |
| GO diuresis                               | 3  | 8  | 0.0137487 | 1813 dopamine receptor D2                                               |
| GO diuresis                               | 3  | 8  | 0.0137487 | 1906 endothelin 1                                                       |
| GO diuresis                               | 3  | 8  | 0.0137487 | 3827 kininogen 1                                                        |
| GO heart trabecula formation              | 3  | 8  | 0.0137487 | 5950 retinol binding protein 4, plasma                                  |
| GO heart trabecula formation              | 3  | 8  | 0.0137487 | 7049 transforming growth factor, beta receptor III                      |
| GO heart trabecula formation              | 3  | 8  | 0.0137487 | 9510 ADAM metalloproteinase with thrombospondin type 1 motif, 1         |
| GO positive regulation of NF-kappaB imp   | 3  | 8  | 0.0137487 | 7097 toll-like receptor 2                                               |
| GO positive regulation of NF-kappaB imp   | 3  | 8  | 0.0137487 | 7098 toll-like receptor 3                                               |
| GO positive regulation of NF-kappaB imp   | 3  | 8  | 0.0137487 | 7099 toll-like receptor 4                                               |
| GO integrin-mediated signaling pathway    | 9  | 57 | 0.0145803 | 3678 integrin, alpha 5 (fibronectin receptor, alpha polypeptide)        |
| GO integrin-mediated signaling pathway    | 9  | 57 | 0.0145803 | 3687 integrin, alpha X (complement component 3 receptor 4 subunit)      |
| GO integrin-mediated signaling pathway    | 9  | 57 | 0.0145803 | 3689 integrin, beta 2 (complement component 3 receptor 3 and 4 subunit) |
| GO integrin-mediated signaling pathway    | 9  | 57 | 0.0145803 | 3691 integrin, beta 4                                                   |
| GO integrin-mediated signaling pathway    | 9  | 57 | 0.0145803 | 3696 integrin, beta 8                                                   |
| GO integrin-mediated signaling pathway    | 9  | 57 | 0.0145803 | 3911 laminin, alpha 5                                                   |
| GO integrin-mediated signaling pathway    | 9  | 57 | 0.0145803 | 6850 spleen tyrosine kinase                                             |
| GO integrin-mediated signaling pathway    | 9  | 57 | 0.0145803 | 9510 ADAM metalloproteinase with thrombospondin type 1 motif, 1         |
| GO integrin-mediated signaling pathway    | 9  | 57 | 0.0145803 | 961 CD47 molecule                                                       |
| GO lyase activity                         | 13 | 97 | 0.0146538 | 11238 carbonic anhydrase VB, mitochondrial                              |
| GO lyase activity                         | 13 | 97 | 0.0146538 | 2026 enolase 2 (gamma, neuronal)                                        |
| GO lyase activity                         | 13 | 97 | 0.0146538 | 2571 glutamate decarboxylase 1 (brain, 67kDa)                           |
| GO lyase activity                         | 13 | 97 | 0.0146538 | 2752 glutamate-ammonia ligase (glutamine synthetase)                    |
| GO lyase activity                         | 13 | 97 | 0.0146538 | 3034 histidine ammonia-lyase                                            |

|    |                                         |    |    |           |                                                                             |
|----|-----------------------------------------|----|----|-----------|-----------------------------------------------------------------------------|
| GO | lyase activity                          | 13 | 97 | 0.0146538 | 4056 leukotriene C4 synthase                                                |
| GO | lyase activity                          | 13 | 97 | 0.0146538 | 48 aconitase 1, soluble                                                     |
| GO | lyase activity                          | 13 | 97 | 0.0146538 | 5066 peptidylglycine alpha-amidating monooxygenase                          |
| GO | lyase activity                          | 13 | 97 | 0.0146538 | 54511 3-hydroxymethyl-3-methylglutaryl-Coenzyme A lyase-like 1              |
| GO | lyase activity                          | 13 | 97 | 0.0146538 | 55268 enoyl Coenzyme A hydratase domain containing 2                        |
| GO | lyase activity                          | 13 | 97 | 0.0146538 | 760 carbonic anhydrase II                                                   |
| GO | lyase activity                          | 13 | 97 | 0.0146538 | 771 carbonic anhydrase XII                                                  |
| GO | lyase activity                          | 13 | 97 | 0.0146538 | 79661 nei endonuclease VIII-like 1 (E. coli)                                |
| GO | endomembrane system                     | 11 | 77 | 0.0152149 | 10435 CDC42 effector protein (Rho GTPase binding) 2                         |
| GO | endomembrane system                     | 11 | 77 | 0.0152149 | 112574 sorting nexin 18                                                     |
| GO | endomembrane system                     | 11 | 77 | 0.0152149 | 114569 mal, T-cell differentiation protein 2                                |
| GO | endomembrane system                     | 11 | 77 | 0.0152149 | 148170 CDC42 effector protein (Rho GTPase binding) 5                        |
| GO | endomembrane system                     | 11 | 77 | 0.0152149 | 23348 dedicator of cytokinesis 9                                            |
| GO | endomembrane system                     | 11 | 77 | 0.0152149 | 29126 CD274 molecule                                                        |
| GO | endomembrane system                     | 11 | 77 | 0.0152149 | 5046 proprotein convertase subtilisin/kexin type 6                          |
| GO | endomembrane system                     | 11 | 77 | 0.0152149 | 56288 par-3 partitioning defective 3 homolog (C. elegans)                   |
| GO | endomembrane system                     | 11 | 77 | 0.0152149 | 6494 signal-induced proliferation-associated 1                              |
| GO | endomembrane system                     | 11 | 77 | 0.0152149 | 81544 glycerophosphodiester phosphodiesterase domain containing 5           |
| GO | endomembrane system                     | 11 | 77 | 0.0152149 | 83394 PTPNM family member 3                                                 |
| GO | ureteric bud development                | 7  | 39 | 0.0153323 | 10252 sprouty homolog 1, antagonist of FGF signaling (Drosophila)           |
| GO | ureteric bud development                | 7  | 39 | 0.0153323 | 168667 BMP binding endothelial regulator                                    |
| GO | ureteric bud development                | 7  | 39 | 0.0153323 | 2296 forkhead box C1                                                        |
| GO | ureteric bud development                | 7  | 39 | 0.0153323 | 2303 forkhead box C2 (MFH-1, mesenchyme forkhead 1)                         |
| GO | ureteric bud development                | 7  | 39 | 0.0153323 | 4087 SMAD family member 2                                                   |
| GO | ureteric bud development                | 7  | 39 | 0.0153323 | 627 brain-derived neurotrophic factor                                       |
| GO | ureteric bud development                | 7  | 39 | 0.0153323 | 652 bone morphogenetic protein 4                                            |
| GO | positive regulation of gene-specific tr | 7  | 39 | 0.0153323 | 10891 peroxisome proliferator-activated receptor gamma, coactivator 1 alpha |
| GO | positive regulation of gene-specific tr | 7  | 39 | 0.0153323 | 3479 insulin-like growth factor 1 (somatomedin C)                           |
| GO | positive regulation of gene-specific tr | 7  | 39 | 0.0153323 | 3569 interleukin 6 (interferon, beta 2)                                     |
| GO | positive regulation of gene-specific tr | 7  | 39 | 0.0153323 | 4087 SMAD family member 2                                                   |
| GO | positive regulation of gene-specific tr | 7  | 39 | 0.0153323 | 6096 RAR-related orphan receptor B                                          |
| GO | positive regulation of gene-specific tr | 7  | 39 | 0.0153323 | 652 bone morphogenetic protein 4                                            |
| GO | positive regulation of gene-specific tr | 7  | 39 | 0.0153323 | 7026 nuclear receptor subfamily 2, group F, member 2                        |
| GO | regulation of mitotic cell cycle        | 4  | 15 | 0.0161327 | 150094 salt-inducible kinase 1                                              |
| GO | regulation of mitotic cell cycle        | 4  | 15 | 0.0161327 | 2290 forkhead box G1                                                        |
| GO | regulation of mitotic cell cycle        | 4  | 15 | 0.0161327 | 415116 pim-3 oncogene                                                       |

|                                     |     |      |           |                                                                               |
|-------------------------------------|-----|------|-----------|-------------------------------------------------------------------------------|
| GO regulation of mitotic cell cycle | 4   | 15   | 0.0161327 | 51754 transmembrane protein 8B                                                |
| GO neural tube development          | 4   | 15   | 0.0161327 | 1969 EPH receptor A2                                                          |
| GO neural tube development          | 4   | 15   | 0.0161327 | 2737 GLI family zinc finger 3                                                 |
| GO neural tube development          | 4   | 15   | 0.0161327 | 4851 Notch homolog 1, translocation-associated (Drosophila)                   |
| GO neural tube development          | 4   | 15   | 0.0161327 | 5362 plexin A2                                                                |
| GO cholesterol metabolic process    | 9   | 58   | 0.0162435 | 2055 ceroid-lipofuscinosis, neuronal 8 (epilepsy, progressive with mental ret |
| GO cholesterol metabolic process    | 9   | 58   | 0.0162435 | 23780 apolipoprotein L, 2                                                     |
| GO cholesterol metabolic process    | 9   | 58   | 0.0162435 | 255738 proprotein convertase subtilisin/kexin type 9                          |
| GO cholesterol metabolic process    | 9   | 58   | 0.0162435 | 26119 low density lipoprotein receptor adaptor protein 1                      |
| GO cholesterol metabolic process    | 9   | 58   | 0.0162435 | 3949 low density lipoprotein receptor                                         |
| GO cholesterol metabolic process    | 9   | 58   | 0.0162435 | 6256 retinoid X receptor, alpha                                               |
| GO cholesterol metabolic process    | 9   | 58   | 0.0162435 | 6653 sortilin-related receptor, L(DLR class) A repeats-containing             |
| GO cholesterol metabolic process    | 9   | 58   | 0.0162435 | 8542 apolipoprotein L, 1                                                      |
| GO cholesterol metabolic process    | 9   | 58   | 0.0162435 | 9619 ATP-binding cassette, sub-family G (WHITE), member 1                     |
| GO SMAD binding                     | 6   | 31   | 0.0169507 | 2033 E1A binding protein p300                                                 |
| GO SMAD binding                     | 6   | 31   | 0.0169507 | 28996 homeodomain interacting protein kinase 2                                |
| GO SMAD binding                     | 6   | 31   | 0.0169507 | 5371 promyelocytic leukemia                                                   |
| GO SMAD binding                     | 6   | 31   | 0.0169507 | 7049 transforming growth factor, beta receptor III                            |
| GO SMAD binding                     | 6   | 31   | 0.0169507 | 91 activin A receptor, type IB                                                |
| GO SMAD binding                     | 6   | 31   | 0.0169507 | 94 activin A receptor type II-like 1                                          |
| GO intracellular                    | 145 | 1794 | 0.0172868 | 10156 RAS p21 protein activator 4                                             |
| GO intracellular                    | 145 | 1794 | 0.0172868 | 10346 tripartite motif-containing 22                                          |
| GO intracellular                    | 145 | 1794 | 0.0172868 | 104 adenosine deaminase, RNA-specific, B1 (RED1 homolog rat)                  |
| GO intracellular                    | 145 | 1794 | 0.0172868 | 10838 zinc finger protein 275                                                 |
| GO intracellular                    | 145 | 1794 | 0.0172868 | 10906 TRAF-type zinc finger domain containing 1                               |
| GO intracellular                    | 145 | 1794 | 0.0172868 | 11043 midline 2                                                               |
| GO intracellular                    | 145 | 1794 | 0.0172868 | 11074 tripartite motif-containing 31                                          |
| GO intracellular                    | 145 | 1794 | 0.0172868 | 1124 chimerin (chimaerin) 2                                                   |
| GO intracellular                    | 145 | 1794 | 0.0172868 | 11279 Kruppel-like factor 8                                                   |
| GO intracellular                    | 145 | 1794 | 0.0172868 | 115196 zinc finger protein 554                                                |
| GO intracellular                    | 145 | 1794 | 0.0172868 | 116113 forkhead box P4                                                        |
| GO intracellular                    | 145 | 1794 | 0.0172868 | 116984 ArfGAP with RhoGAP domain, ankyrin repeat and PH domain 2              |
| GO intracellular                    | 145 | 1794 | 0.0172868 | 1193 chloride intracellular channel 2                                         |
| GO intracellular                    | 145 | 1794 | 0.0172868 | 129049 small G protein signaling modulator 1                                  |
| GO intracellular                    | 145 | 1794 | 0.0172868 | 134218 DnaJ (Hsp40) homolog, subfamily C, member 21                           |
| GO intracellular                    | 145 | 1794 | 0.0172868 | 135112 nuclear receptor coactivator 7                                         |

|                  |     |      |           |                                                                            |
|------------------|-----|------|-----------|----------------------------------------------------------------------------|
| GO intracellular | 145 | 1794 | 0.0172868 | 135644 tripartite motif-containing 40                                      |
| GO intracellular | 145 | 1794 | 0.0172868 | 147694 zinc finger protein 548                                             |
| GO intracellular | 145 | 1794 | 0.0172868 | 147923 zinc finger protein 420                                             |
| GO intracellular | 145 | 1794 | 0.0172868 | 1508 cathepsin B                                                           |
| GO intracellular | 145 | 1794 | 0.0172868 | 152273 FYVE, RhoGEF and PH domain containing 5                             |
| GO intracellular | 145 | 1794 | 0.0172868 | 1540 cylindromatosis (turban tumor syndrome)                               |
| GO intracellular | 145 | 1794 | 0.0172868 | 162962 zinc finger protein 836                                             |
| GO intracellular | 145 | 1794 | 0.0172868 | 163050 zinc finger protein 564                                             |
| GO intracellular | 145 | 1794 | 0.0172868 | 163115 zinc finger protein 781                                             |
| GO intracellular | 145 | 1794 | 0.0172868 | 1820 AT rich interactive domain 3A (BRIGHT-like)                           |
| GO intracellular | 145 | 1794 | 0.0172868 | 1958 early growth response 1                                               |
| GO intracellular | 145 | 1794 | 0.0172868 | 1959 early growth response 2                                               |
| GO intracellular | 145 | 1794 | 0.0172868 | 1960 early growth response 3                                               |
| GO intracellular | 145 | 1794 | 0.0172868 | 201501 zinc finger and BTB domain containing 7C                            |
| GO intracellular | 145 | 1794 | 0.0172868 | 2026 enolase 2 (gamma, neuronal)                                           |
| GO intracellular | 145 | 1794 | 0.0172868 | 2122 MDS1 and EVI1 complex locus                                           |
| GO intracellular | 145 | 1794 | 0.0172868 | 221178 spermatogenesis associated 13                                       |
| GO intracellular | 145 | 1794 | 0.0172868 | 22807 IKAROS family zinc finger 2 (Helios)                                 |
| GO intracellular | 145 | 1794 | 0.0172868 | 23092 Rho GTPase activating protein 26                                     |
| GO intracellular | 145 | 1794 | 0.0172868 | 23099 zinc finger and BTB domain containing 43                             |
| GO intracellular | 145 | 1794 | 0.0172868 | 23119 hypermethylated in cancer 2                                          |
| GO intracellular | 145 | 1794 | 0.0172868 | 23179 ral guanine nucleotide dissociation stimulator-like 1                |
| GO intracellular | 145 | 1794 | 0.0172868 | 23263 MCF.2 cell line derived transforming sequence-like                   |
| GO intracellular | 145 | 1794 | 0.0172868 | 2331 fibromodulin                                                          |
| GO intracellular | 145 | 1794 | 0.0172868 | 23365 Rho guanine nucleotide exchange factor (GEF) 12                      |
| GO intracellular | 145 | 1794 | 0.0172868 | 23650 tripartite motif-containing 29                                       |
| GO intracellular | 145 | 1794 | 0.0172868 | 23654 plexin B2                                                            |
| GO intracellular | 145 | 1794 | 0.0172868 | 2521 fused in sarcoma                                                      |
| GO intracellular | 145 | 1794 | 0.0172868 | 256051 zinc finger protein 549                                             |
| GO intracellular | 145 | 1794 | 0.0172868 | 2571 glutamate decarboxylase 1 (brain, 67kDa)                              |
| GO intracellular | 145 | 1794 | 0.0172868 | 25946 zinc finger protein 385A                                             |
| GO intracellular | 145 | 1794 | 0.0172868 | 26030 pleckstrin homology domain containing, family G (with RhoGef domain) |
| GO intracellular | 145 | 1794 | 0.0172868 | 2737 GLI family zinc finger 3                                              |
| GO intracellular | 145 | 1794 | 0.0172868 | 27434 polymerase (DNA directed), mu                                        |
| GO intracellular | 145 | 1794 | 0.0172868 | 2752 glutamate-ammonia ligase (glutamine synthetase)                       |
| GO intracellular | 145 | 1794 | 0.0172868 | 284346 zinc finger protein 575                                             |

|                  |     |      |           |                                                                             |
|------------------|-----|------|-----------|-----------------------------------------------------------------------------|
| GO intracellular | 145 | 1794 | 0.0172868 | 29108 PYD and CARD domain containing                                        |
| GO intracellular | 145 | 1794 | 0.0172868 | 29116 myosin regulatory light chain interacting protein                     |
| GO intracellular | 145 | 1794 | 0.0172868 | 29760 B-cell linker                                                         |
| GO intracellular | 145 | 1794 | 0.0172868 | 342908 zinc finger protein 404                                              |
| GO intracellular | 145 | 1794 | 0.0172868 | 345462 zinc finger protein 879                                              |
| GO intracellular | 145 | 1794 | 0.0172868 | 379 ADP-ribosylation factor-like 4D                                         |
| GO intracellular | 145 | 1794 | 0.0172868 | 3845 v-Ki-ras2 Kirsten rat sarcoma viral oncogene homolog                   |
| GO intracellular | 145 | 1794 | 0.0172868 | 388536 zinc finger protein 790                                              |
| GO intracellular | 145 | 1794 | 0.0172868 | 388558 zinc finger protein 808                                              |
| GO intracellular | 145 | 1794 | 0.0172868 | 388567 zinc finger protein 749                                              |
| GO intracellular | 145 | 1794 | 0.0172868 | 388591 ring finger protein 207                                              |
| GO intracellular | 145 | 1794 | 0.0172868 | 388743 calpain 8                                                            |
| GO intracellular | 145 | 1794 | 0.0172868 | 389058 Sp5 transcription factor                                             |
| GO intracellular | 145 | 1794 | 0.0172868 | 389337 Rho guanine nucleotide exchange factor (GEF) 37                      |
| GO intracellular | 145 | 1794 | 0.0172868 | 395 Rho GTPase activating protein 6                                         |
| GO intracellular | 145 | 1794 | 0.0172868 | 400713 zinc finger protein 880                                              |
| GO intracellular | 145 | 1794 | 0.0172868 | 4087 SMAD family member 2                                                   |
| GO intracellular | 145 | 1794 | 0.0172868 | 4194 Mdm4 p53 binding protein homolog (mouse)                               |
| GO intracellular | 145 | 1794 | 0.0172868 | 440107 pleckstrin homology domain containing, family G (with RhoGef domain) |
| GO intracellular | 145 | 1794 | 0.0172868 | 4784 nuclear factor I/X (CCAAT-binding transcription factor)                |
| GO intracellular | 145 | 1794 | 0.0172868 | 4802 nuclear transcription factor Y, gamma                                  |
| GO intracellular | 145 | 1794 | 0.0172868 | 51274 Kruppel-like factor 3 (basic)                                         |
| GO intracellular | 145 | 1794 | 0.0172868 | 51621 Kruppel-like factor 13                                                |
| GO intracellular | 145 | 1794 | 0.0172868 | 51655 RAS, dexamethasone-induced 1                                          |
| GO intracellular | 145 | 1794 | 0.0172868 | 51710 zinc finger protein 44                                                |
| GO intracellular | 145 | 1794 | 0.0172868 | 5295 phosphoinositide-3-kinase, regulatory subunit 1 (alpha)                |
| GO intracellular | 145 | 1794 | 0.0172868 | 5325 pleiomorphic adenoma gene-like 1                                       |
| GO intracellular | 145 | 1794 | 0.0172868 | 5362 plexin A2                                                              |
| GO intracellular | 145 | 1794 | 0.0172868 | 5371 promyelocytic leukemia                                                 |
| GO intracellular | 145 | 1794 | 0.0172868 | 54769 DIRAS family, GTP-binding RAS-like 2                                  |
| GO intracellular | 145 | 1794 | 0.0172868 | 54848 Rho guanine nucleotide exchange factor (GEF) 38                       |
| GO intracellular | 145 | 1794 | 0.0172868 | 54932 exonuclease 3'-5' domain containing 3                                 |
| GO intracellular | 145 | 1794 | 0.0172868 | 55160 Rho guanine nucleotide exchange factor (GEF) 10-like                  |
| GO intracellular | 145 | 1794 | 0.0172868 | 55184 chromosome 20 open reading frame 12                                   |
| GO intracellular | 145 | 1794 | 0.0172868 | 55200 pleckstrin homology domain containing, family G (with RhoGef domain)  |
| GO intracellular | 145 | 1794 | 0.0172868 | 55357 TBC1 domain family, member 2                                          |

|                  |     |      |           |                                                                              |
|------------------|-----|------|-----------|------------------------------------------------------------------------------|
| GO intracellular | 145 | 1794 | 0.0172868 | 55432 YOD1 OTU deubiquinating enzyme 1 homolog ( <i>S. cerevisiae</i> )      |
| GO intracellular | 145 | 1794 | 0.0172868 | 55657 zinc finger protein 692                                                |
| GO intracellular | 145 | 1794 | 0.0172868 | 55762 zinc finger protein 701                                                |
| GO intracellular | 145 | 1794 | 0.0172868 | 55769 zinc finger protein 83                                                 |
| GO intracellular | 145 | 1794 | 0.0172868 | 55893 zinc finger protein 395                                                |
| GO intracellular | 145 | 1794 | 0.0172868 | 56978 PR domain containing 8                                                 |
| GO intracellular | 145 | 1794 | 0.0172868 | 57139 ral guanine nucleotide dissociation stimulator-like 3                  |
| GO intracellular | 145 | 1794 | 0.0172868 | 57186 Ral GTPase activating protein, alpha subunit 2 (catalytic)             |
| GO intracellular | 145 | 1794 | 0.0172868 | 57221 KIAA1244                                                               |
| GO intracellular | 145 | 1794 | 0.0172868 | 57636 Rho GTPase activating protein 23                                       |
| GO intracellular | 145 | 1794 | 0.0172868 | 5900 ral guanine nucleotide dissociation stimulator                          |
| GO intracellular | 145 | 1794 | 0.0172868 | 604 B-cell CLL/lymphoma 6                                                    |
| GO intracellular | 145 | 1794 | 0.0172868 | 6239 ras responsive element binding protein 1                                |
| GO intracellular | 145 | 1794 | 0.0172868 | 64127 nucleotide-binding oligomerization domain containing 2                 |
| GO intracellular | 145 | 1794 | 0.0172868 | 64135 interferon induced with helicase C domain 1                            |
| GO intracellular | 145 | 1794 | 0.0172868 | 64798 DEP domain containing 6                                                |
| GO intracellular | 145 | 1794 | 0.0172868 | 6494 signal-induced proliferation-associated 1                               |
| GO intracellular | 145 | 1794 | 0.0172868 | 687 Kruppel-like factor 9                                                    |
| GO intracellular | 145 | 1794 | 0.0172868 | 7071 Kruppel-like factor 10                                                  |
| GO intracellular | 145 | 1794 | 0.0172868 | 7227 trichorhinophalangeal syndrome I                                        |
| GO intracellular | 145 | 1794 | 0.0172868 | 726 calpain 5                                                                |
| GO intracellular | 145 | 1794 | 0.0172868 | 7546 Zic family member 2 (odd-paired homolog, <i>Drosophila</i> )            |
| GO intracellular | 145 | 1794 | 0.0172868 | 7565 zinc finger protein 17                                                  |
| GO intracellular | 145 | 1794 | 0.0172868 | 7597 zinc finger and BTB domain containing 25                                |
| GO intracellular | 145 | 1794 | 0.0172868 | 7678 zinc finger protein 124                                                 |
| GO intracellular | 145 | 1794 | 0.0172868 | 79092 caspase recruitment domain family, member 14                           |
| GO intracellular | 145 | 1794 | 0.0172868 | 79444 baculoviral IAP repeat-containing 7                                    |
| GO intracellular | 145 | 1794 | 0.0172868 | 79668 poly (ADP-ribose) polymerase family, member 8                          |
| GO intracellular | 145 | 1794 | 0.0172868 | 79673 zinc finger protein 329                                                |
| GO intracellular | 145 | 1794 | 0.0172868 | 7984 Rho guanine nucleotide exchange factor (GEF) 5                          |
| GO intracellular | 145 | 1794 | 0.0172868 | 79872 Cas-Br-M (murine) ecotropic retroviral transforming sequence-like 1    |
| GO intracellular | 145 | 1794 | 0.0172868 | 79894 zinc finger protein 672                                                |
| GO intracellular | 145 | 1794 | 0.0172868 | 81844 tripartite motif-containing 56                                         |
| GO intracellular | 145 | 1794 | 0.0172868 | 8313 axin 2                                                                  |
| GO intracellular | 145 | 1794 | 0.0172868 | 83394 PITPNM family member 3                                                 |
| GO intracellular | 145 | 1794 | 0.0172868 | 834 caspase 1, apoptosis-related cysteine peptidase (interleukin 1, beta, co |



|                                          |     |      |           |                                                                             |
|------------------------------------------|-----|------|-----------|-----------------------------------------------------------------------------|
| GO intracellular                         | 145 | 1794 | 0.0172868 | 837 caspase 4, apoptosis-related cysteine peptidase                         |
| GO intracellular                         | 145 | 1794 | 0.0172868 | 84033 obscurin, cytoskeletal calmodulin and titin-interacting RhoGEF        |
| GO intracellular                         | 145 | 1794 | 0.0172868 | 84124 zinc finger protein 394                                               |
| GO intracellular                         | 145 | 1794 | 0.0172868 | 84159 AT rich interactive domain 5B (MRF1-like)                             |
| GO intracellular                         | 145 | 1794 | 0.0172868 | 8462 Kruppel-like factor 11                                                 |
| GO intracellular                         | 145 | 1794 | 0.0172868 | 84674 caspase recruitment domain family, member 6                           |
| GO intracellular                         | 145 | 1794 | 0.0172868 | 84858 zinc finger protein 503                                               |
| GO intracellular                         | 145 | 1794 | 0.0172868 | 84911 zinc finger protein 382                                               |
| GO intracellular                         | 145 | 1794 | 0.0172868 | 85004 RAS-like, estrogen-regulated, growth inhibitor                        |
| GO intracellular                         | 145 | 1794 | 0.0172868 | 85416 Zic family member 5 (odd-paired homolog, Drosophila)                  |
| GO intracellular                         | 145 | 1794 | 0.0172868 | 85441 peroxisomal proliferator-activated receptor A interacting complex 285 |
| GO intracellular                         | 145 | 1794 | 0.0172868 | 89870 tripartite motif-containing 15                                        |
| GO intracellular                         | 145 | 1794 | 0.0172868 | 8996 nucleolar protein 3 (apoptosis repressor with CARD domain)             |
| GO intracellular                         | 145 | 1794 | 0.0172868 | 90592 zinc finger protein 700                                               |
| GO intracellular                         | 145 | 1794 | 0.0172868 | 92283 zinc finger protein 461                                               |
| GO intracellular                         | 145 | 1794 | 0.0172868 | 92822 zinc finger protein 276                                               |
| GO intracellular                         | 145 | 1794 | 0.0172868 | 9314 Kruppel-like factor 4 (gut)                                            |
| GO intracellular                         | 145 | 1794 | 0.0172868 | 94059 leukocyte receptor cluster (LRC) member 9                             |
| GO intracellular                         | 145 | 1794 | 0.0172868 | 9422 zinc finger protein 264                                                |
| GO intracellular                         | 145 | 1794 | 0.0172868 | 9459 Rac/Cdc42 guanine nucleotide exchange factor (GEF) 6                   |
| GO intracellular                         | 145 | 1794 | 0.0172868 | 9615 guanine deaminase                                                      |
| GO blood vessel development              | 7   | 40   | 0.0175194 | 183 angiotensinogen (serpin peptidase inhibitor, clade A, member 8)         |
| GO blood vessel development              | 7   | 40   | 0.0175194 | 1969 EPH receptor A2                                                        |
| GO blood vessel development              | 7   | 40   | 0.0175194 | 2296 forkhead box C1                                                        |
| GO blood vessel development              | 7   | 40   | 0.0175194 | 2303 forkhead box C2 (MFH-1, mesenchyme forkhead 1)                         |
| GO blood vessel development              | 7   | 40   | 0.0175194 | 4005 LIM domain only 2 (rhombotin-like 1)                                   |
| GO blood vessel development              | 7   | 40   | 0.0175194 | 4015 lysyl oxidase                                                          |
| GO blood vessel development              | 7   | 40   | 0.0175194 | 652 bone morphogenetic protein 4                                            |
| GO positive regulation of glucose import | 5   | 23   | 0.0176969 | 2066 v-erb-a erythroblastic leukemia viral oncogene homolog 4 (avian)       |
| GO positive regulation of glucose import | 5   | 23   | 0.0176969 | 3643 insulin receptor                                                       |
| GO positive regulation of glucose import | 5   | 23   | 0.0176969 | 5295 phosphoinositide-3-kinase, regulatory subunit 1 (alpha)                |
| GO positive regulation of glucose import | 5   | 23   | 0.0176969 | 55600 intelectin 1 (galactofuranose binding)                                |
| GO positive regulation of glucose import | 5   | 23   | 0.0176969 | 8660 insulin receptor substrate 2                                           |
| GO negative regulation of cell adhesion  | 5   | 23   | 0.0176969 | 375056 melanoma inhibitory activity family, member 3                        |
| GO negative regulation of cell adhesion  | 5   | 23   | 0.0176969 | 3827 kininogen 1                                                            |
| GO negative regulation of cell adhesion  | 5   | 23   | 0.0176969 | 6494 signal-induced proliferation-associated 1                              |

|    |                                       |    |     |           |        |                                                                          |
|----|---------------------------------------|----|-----|-----------|--------|--------------------------------------------------------------------------|
| GO | negative regulation of cell adhesion  | 5  | 23  | 0.0176969 | 79872  | Cas-Br-M (murine) ecotropic retroviral transforming sequence-like 1      |
| GO | negative regulation of cell adhesion  | 5  | 23  | 0.0176969 | 94     | activin A receptor type II-like 1                                        |
| GO | SH3/SH2 adaptor activity              | 8  | 50  | 0.0192139 | 10140  | transducer of ERBB2, 1                                                   |
| GO | SH3/SH2 adaptor activity              | 8  | 50  | 0.0192139 | 1124   | chimerin (chimaerin) 2                                                   |
| GO | SH3/SH2 adaptor activity              | 8  | 50  | 0.0192139 | 29760  | B-cell linker                                                            |
| GO | SH3/SH2 adaptor activity              | 8  | 50  | 0.0192139 | 395    | Rho GTPase activating protein 6                                          |
| GO | SH3/SH2 adaptor activity              | 8  | 50  | 0.0192139 | 55824  | phosphoprotein associated with glycosphingolipid microdomains 1          |
| GO | SH3/SH2 adaptor activity              | 8  | 50  | 0.0192139 | 6452   | SH3-domain binding protein 2                                             |
| GO | SH3/SH2 adaptor activity              | 8  | 50  | 0.0192139 | 84941  | hematopoietic SH2 domain containing                                      |
| GO | SH3/SH2 adaptor activity              | 8  | 50  | 0.0192139 | 8631   | src kinase associated phosphoprotein 1                                   |
| GO | response to estrogen stimulus         | 8  | 50  | 0.0192139 | 10568  | solute carrier family 34 (sodium phosphate), member 2                    |
| GO | response to estrogen stimulus         | 8  | 50  | 0.0192139 | 1080   | cystic fibrosis transmembrane conductance regulator (ATP-binding cas-    |
| GO | response to estrogen stimulus         | 8  | 50  | 0.0192139 | 2033   | E1A binding protein p300                                                 |
| GO | response to estrogen stimulus         | 8  | 50  | 0.0192139 | 2947   | glutathione S-transferase mu 3 (brain)                                   |
| GO | response to estrogen stimulus         | 8  | 50  | 0.0192139 | 3949   | low density lipoprotein receptor                                         |
| GO | response to estrogen stimulus         | 8  | 50  | 0.0192139 | 412    | steroid sulfatase (microsomal), isozyme S                                |
| GO | response to estrogen stimulus         | 8  | 50  | 0.0192139 | 760    | carbonic anhydrase II                                                    |
| GO | response to estrogen stimulus         | 8  | 50  | 0.0192139 | 7706   | tripartite motif-containing 25                                           |
| GO | blood vessel morphogenesis            | 3  | 9   | 0.0195873 | 1906   | endothelin 1                                                             |
| GO | blood vessel morphogenesis            | 3  | 9   | 0.0195873 | 5327   | plasminogen activator, tissue                                            |
| GO | blood vessel morphogenesis            | 3  | 9   | 0.0195873 | 7026   | nuclear receptor subfamily 2, group F, member 2                          |
| GO | cytoplasmic sequestering of transcrip | 3  | 9   | 0.0195873 | 4792   | nuclear factor of kappa light polypeptide gene enhancer in B-cells inhib |
| GO | cytoplasmic sequestering of transcrip | 3  | 9   | 0.0195873 | 4794   | nuclear factor of kappa light polypeptide gene enhancer in B-cells inhib |
| GO | cytoplasmic sequestering of transcrip | 3  | 9   | 0.0195873 | 4795   | nuclear factor of kappa light polypeptide gene enhancer in B-cells inhib |
| GO | oxidoreductase activity               | 40 | 418 | 0.0196684 | 10170  | dehydrogenase/reductase (SDR family) member 9                            |
| GO | oxidoreductase activity               | 40 | 418 | 0.0196684 | 10826  | chromosome 5 open reading frame 4                                        |
| GO | oxidoreductase activity               | 40 | 418 | 0.0196684 | 112724 | retinol dehydrogenase 13 (all-trans/9-cis)                               |
| GO | oxidoreductase activity               | 40 | 418 | 0.0196684 | 124    | alcohol dehydrogenase 1A (class I), alpha polypeptide                    |
| GO | oxidoreductase activity               | 40 | 418 | 0.0196684 | 125    | alcohol dehydrogenase 1B (class I), beta polypeptide                     |
| GO | oxidoreductase activity               | 40 | 418 | 0.0196684 | 1559   | cytochrome P450, family 2, subfamily C, polypeptide 9                    |
| GO | oxidoreductase activity               | 40 | 418 | 0.0196684 | 1571   | cytochrome P450, family 2, subfamily E, polypeptide 1                    |
| GO | oxidoreductase activity               | 40 | 418 | 0.0196684 | 157506 | retinol dehydrogenase 10 (all-trans)                                     |
| GO | oxidoreductase activity               | 40 | 418 | 0.0196684 | 1577   | cytochrome P450, family 3, subfamily A, polypeptide 5                    |
| GO | oxidoreductase activity               | 40 | 418 | 0.0196684 | 195814 | short chain dehydrogenase/reductase family 16C, member 5                 |
| GO | oxidoreductase activity               | 40 | 418 | 0.0196684 | 2153   | coagulation factor V (proaccelerin, labile factor)                       |
| GO | oxidoreductase activity               | 40 | 418 | 0.0196684 | 23081  | lysine (K)-specific demethylase 4C                                       |

|                                            |    |     |           |                                                                            |
|--------------------------------------------|----|-----|-----------|----------------------------------------------------------------------------|
| GO oxidoreductase activity                 | 40 | 418 | 0.0196684 | 240 arachidonate 5-lipoxygenase                                            |
| GO oxidoreductase activity                 | 40 | 418 | 0.0196684 | 254295 phytanoyl-CoA dioxygenase domain containing 1                       |
| GO oxidoreductase activity                 | 40 | 418 | 0.0196684 | 27035 NADPH oxidase 1                                                      |
| GO oxidoreductase activity                 | 40 | 418 | 0.0196684 | 316 aldehyde oxidase 1                                                     |
| GO oxidoreductase activity                 | 40 | 418 | 0.0196684 | 3294 hydroxysteroid (17-beta) dehydrogenase 2                              |
| GO oxidoreductase activity                 | 40 | 418 | 0.0196684 | 345275 hydroxysteroid (17-beta) dehydrogenase 13                           |
| GO oxidoreductase activity                 | 40 | 418 | 0.0196684 | 4015 lysyl oxidase                                                         |
| GO oxidoreductase activity                 | 40 | 418 | 0.0196684 | 4128 monoamine oxidase A                                                   |
| GO oxidoreductase activity                 | 40 | 418 | 0.0196684 | 4129 monoamine oxidase B                                                   |
| GO oxidoreductase activity                 | 40 | 418 | 0.0196684 | 4524 5,10-methylenetetrahydrofolate reductase (NADPH)                      |
| GO oxidoreductase activity                 | 40 | 418 | 0.0196684 | 4842 nitric oxide synthase 1 (neuronal)                                    |
| GO oxidoreductase activity                 | 40 | 418 | 0.0196684 | 55068 ecto-NOX disulfide-thiol exchanger 1                                 |
| GO oxidoreductase activity                 | 40 | 418 | 0.0196684 | 55693 lysine (K)-specific demethylase 4D                                   |
| GO oxidoreductase activity                 | 40 | 418 | 0.0196684 | 56605 ERO1-like beta ( <i>S. cerevisiae</i> )                              |
| GO oxidoreductase activity                 | 40 | 418 | 0.0196684 | 5742 prostaglandin-endoperoxide synthase 1 (prostaglandin G/H synthase and |
| GO oxidoreductase activity                 | 40 | 418 | 0.0196684 | 5768 quiescin Q6 sulfhydryl oxidase 1                                      |
| GO oxidoreductase activity                 | 40 | 418 | 0.0196684 | 59344 arachidonate lipoxygenase 3                                          |
| GO oxidoreductase activity                 | 40 | 418 | 0.0196684 | 622 3-hydroxybutyrate dehydrogenase, type 1                                |
| GO oxidoreductase activity                 | 40 | 418 | 0.0196684 | 64359 nucleoredoxin                                                        |
| GO oxidoreductase activity                 | 40 | 418 | 0.0196684 | 7001 peroxiredoxin 2                                                       |
| GO oxidoreductase activity                 | 40 | 418 | 0.0196684 | 7404 ubiquitously transcribed tetratricopeptide repeat gene, Y-linked      |
| GO oxidoreductase activity                 | 40 | 418 | 0.0196684 | 79152 fatty acid 2-hydroxylase                                             |
| GO oxidoreductase activity                 | 40 | 418 | 0.0196684 | 79689 STEAP family member 4                                                |
| GO oxidoreductase activity                 | 40 | 418 | 0.0196684 | 84171 lysyl oxidase-like 4                                                 |
| GO oxidoreductase activity                 | 40 | 418 | 0.0196684 | 8418 cytidine monophosphate-N-acetylneuraminic acid hydroxylase (CMP-N     |
| GO oxidoreductase activity                 | 40 | 418 | 0.0196684 | 84795 pyridine nucleotide-disulphide oxidoreductase domain 2               |
| GO oxidoreductase activity                 | 40 | 418 | 0.0196684 | 8514 potassium voltage-gated channel, shaker-related subfamily, beta mem   |
| GO oxidoreductase activity                 | 40 | 418 | 0.0196684 | 9563 hexose-6-phosphate dehydrogenase (glucose 1-dehydrogenase)            |
| GO negative regulation of MAP kinase ac    | 4  | 16  | 0.0203699 | 10252 sprouty homolog 1, antagonist of FGF signaling ( <i>Drosophila</i> ) |
| GO negative regulation of MAP kinase ac    | 4  | 16  | 0.0203699 | 10253 sprouty homolog 2 ( <i>Drosophila</i> )                              |
| GO negative regulation of MAP kinase ac    | 4  | 16  | 0.0203699 | 11213 interleukin-1 receptor-associated kinase 3                           |
| GO negative regulation of MAP kinase ac    | 4  | 16  | 0.0203699 | 652 bone morphogenetic protein 4                                           |
| GO positive regulation of endothelial cell | 4  | 16  | 0.0203699 | 183 angiotensinogen (serpin peptidase inhibitor, clade A, member 8)        |
| GO positive regulation of endothelial cell | 4  | 16  | 0.0203699 | 1906 endothelin 1                                                          |
| GO positive regulation of endothelial cell | 4  | 16  | 0.0203699 | 652 bone morphogenetic protein 4                                           |
| GO positive regulation of endothelial cell | 4  | 16  | 0.0203699 | 7474 wntless-type MMTV integration site family, member 5A                  |

|    |                                          |    |    |           |                                                                          |
|----|------------------------------------------|----|----|-----------|--------------------------------------------------------------------------|
| GO | membrane depolarization                  | 4  | 16 | 0.0203699 | 1906 endothelin 1                                                        |
| GO | membrane depolarization                  | 4  | 16 | 0.0203699 | 3725 jun oncogene                                                        |
| GO | membrane depolarization                  | 4  | 16 | 0.0203699 | 5025 purinergic receptor P2X, ligand-gated ion channel, 4                |
| GO | membrane depolarization                  | 4  | 16 | 0.0203699 | 8973 cholinergic receptor, nicotinic, alpha 6                            |
| GO | SMAD protein signal transduction         | 4  | 16 | 0.0203699 | 2353 FBJ murine osteosarcoma viral oncogene homolog                      |
| GO | SMAD protein signal transduction         | 4  | 16 | 0.0203699 | 28996 homeodomain interacting protein kinase 2                           |
| GO | SMAD protein signal transduction         | 4  | 16 | 0.0203699 | 3725 jun oncogene                                                        |
| GO | SMAD protein signal transduction         | 4  | 16 | 0.0203699 | 652 bone morphogenetic protein 4                                         |
| GO | positive regulation of vasoconstrictio   | 4  | 16 | 0.0203699 | 240 arachidonate 5-lipoxygenase                                          |
| GO | positive regulation of vasoconstrictio   | 4  | 16 | 0.0203699 | 4886 neuropeptide Y receptor Y1                                          |
| GO | positive regulation of vasoconstrictio   | 4  | 16 | 0.0203699 | 5742 prostaglandin-endoperoxide synthase 1 (prostaglandin G/H synthase a |
| GO | positive regulation of vasoconstrictio   | 4  | 16 | 0.0203699 | 952 CD38 molecule                                                        |
| GO | negative regulation of transcription, l  | 12 | 91 | 0.0208708 | 2122 MDS1 and EVI1 complex locus                                         |
| GO | negative regulation of transcription, l  | 12 | 91 | 0.0208708 | 2290 forkhead box G1                                                     |
| GO | negative regulation of transcription, l  | 12 | 91 | 0.0208708 | 22904 strawberry notch homolog 2 (Drosophila)                            |
| GO | negative regulation of transcription, l  | 12 | 91 | 0.0208708 | 23119 hypermethylated in cancer 2                                        |
| GO | negative regulation of transcription, l  | 12 | 91 | 0.0208708 | 4087 SMAD family member 2                                                |
| GO | negative regulation of transcription, l  | 12 | 91 | 0.0208708 | 5083 paired box 9                                                        |
| GO | negative regulation of transcription, l  | 12 | 91 | 0.0208708 | 51085 MLX interacting protein-like                                       |
| GO | negative regulation of transcription, l  | 12 | 91 | 0.0208708 | 51655 RAS, dexamethasone-induced 1                                       |
| GO | negative regulation of transcription, l  | 12 | 91 | 0.0208708 | 7227 trichorhinophalangeal syndrome I                                    |
| GO | negative regulation of transcription, l  | 12 | 91 | 0.0208708 | 84159 AT rich interactive domain 5B (MRF1-like)                          |
| GO | negative regulation of transcription, l  | 12 | 91 | 0.0208708 | 8553 basic helix-loop-helix family, member e40                           |
| GO | negative regulation of transcription, l  | 12 | 91 | 0.0208708 | 9314 Kruppel-like factor 4 (gut)                                         |
| GO | positive regulation of nitric oxide bio: | 5  | 24 | 0.0211278 | 1906 endothelin 1                                                        |
| GO | positive regulation of nitric oxide bio: | 5  | 24 | 0.0211278 | 3643 insulin receptor                                                    |
| GO | positive regulation of nitric oxide bio: | 5  | 24 | 0.0211278 | 5025 purinergic receptor P2X, ligand-gated ion channel, 4                |
| GO | positive regulation of nitric oxide bio: | 5  | 24 | 0.0211278 | 7097 toll-like receptor 2                                                |
| GO | positive regulation of nitric oxide bio: | 5  | 24 | 0.0211278 | 7099 toll-like receptor 4                                                |
| GO | response to insulin stimulus             | 8  | 51 | 0.0214672 | 130399 activin A receptor, type IC                                       |
| GO | response to insulin stimulus             | 8  | 51 | 0.0214672 | 1958 early growth response 1                                             |
| GO | response to insulin stimulus             | 8  | 51 | 0.0214672 | 1959 early growth response 2                                             |
| GO | response to insulin stimulus             | 8  | 51 | 0.0214672 | 5465 peroxisome proliferator-activated receptor alpha                    |
| GO | response to insulin stimulus             | 8  | 51 | 0.0214672 | 5950 retinol binding protein 4, plasma                                   |
| GO | response to insulin stimulus             | 8  | 51 | 0.0214672 | 7097 toll-like receptor 2                                                |
| GO | response to insulin stimulus             | 8  | 51 | 0.0214672 | 7099 toll-like receptor 4                                                |

|                                 |    |     |           |                                                                  |
|---------------------------------|----|-----|-----------|------------------------------------------------------------------|
| GO response to insulin stimulus | 8  | 51  | 0.0214672 | 9021 suppressor of cytokine signaling 3                          |
| GO cell growth                  | 7  | 42  | 0.0225346 | 2263 fibroblast growth factor receptor 2                         |
| GO cell growth                  | 7  | 42  | 0.0225346 | 26281 fibroblast growth factor 20                                |
| GO cell growth                  | 7  | 42  | 0.0225346 | 4853 Notch homolog 2 (Drosophila)                                |
| GO cell growth                  | 7  | 42  | 0.0225346 | 54904 Wolf-Hirschhorn syndrome candidate 1-like 1                |
| GO cell growth                  | 7  | 42  | 0.0225346 | 7049 transforming growth factor, beta receptor III               |
| GO cell growth                  | 7  | 42  | 0.0225346 | 8527 diacylglycerol kinase, delta 130kDa                         |
| GO cell growth                  | 7  | 42  | 0.0225346 | 8992 ATPase, H+ transporting, lysosomal 9kDa, V0 subunit e1      |
| GO heart development            | 14 | 114 | 0.0234467 | 116113 forkhead box P4                                           |
| GO heart development            | 14 | 114 | 0.0234467 | 1906 endothelin 1                                                |
| GO heart development            | 14 | 114 | 0.0234467 | 2033 E1A binding protein p300                                    |
| GO heart development            | 14 | 114 | 0.0234467 | 2200 fibrillin 1                                                 |
| GO heart development            | 14 | 114 | 0.0234467 | 2296 forkhead box C1                                             |
| GO heart development            | 14 | 114 | 0.0234467 | 27295 PDZ and LIM domain 3                                       |
| GO heart development            | 14 | 114 | 0.0234467 | 2737 GLI family zinc finger 3                                    |
| GO heart development            | 14 | 114 | 0.0234467 | 4151 myoglobin                                                   |
| GO heart development            | 14 | 114 | 0.0234467 | 4851 Notch homolog 1, translocation-associated (Drosophila)      |
| GO heart development            | 14 | 114 | 0.0234467 | 5318 plakophilin 2                                               |
| GO heart development            | 14 | 114 | 0.0234467 | 5463 POU class 6 homeobox 1                                      |
| GO heart development            | 14 | 114 | 0.0234467 | 5950 retinol binding protein 4, plasma                           |
| GO heart development            | 14 | 114 | 0.0234467 | 6256 retinoid X receptor, alpha                                  |
| GO heart development            | 14 | 114 | 0.0234467 | 9734 histone deacetylase 9                                       |
| GO skeletal system development  | 15 | 125 | 0.0235015 | 1009 cadherin 11, type 2, OB-cadherin (osteoblast)               |
| GO skeletal system development  | 15 | 125 | 0.0235015 | 1969 EPH receptor A2                                             |
| GO skeletal system development  | 15 | 125 | 0.0235015 | 2114 v-ets erythroblastosis virus E26 oncogene homolog 2 (avian) |
| GO skeletal system development  | 15 | 125 | 0.0235015 | 2200 fibrillin 1                                                 |
| GO skeletal system development  | 15 | 125 | 0.0235015 | 2296 forkhead box C1                                             |
| GO skeletal system development  | 15 | 125 | 0.0235015 | 2303 forkhead box C2 (MFH-1, mesenchyme forkhead 1)              |
| GO skeletal system development  | 15 | 125 | 0.0235015 | 3479 insulin-like growth factor 1 (somatomedin C)                |
| GO skeletal system development  | 15 | 125 | 0.0235015 | 3958 lectin, galactoside-binding, soluble, 3                     |
| GO skeletal system development  | 15 | 125 | 0.0235015 | 5307 paired-like homeodomain 1                                   |
| GO skeletal system development  | 15 | 125 | 0.0235015 | 56172 ankylosis, progressive homolog (mouse)                     |
| GO skeletal system development  | 15 | 125 | 0.0235015 | 7071 Kruppel-like factor 10                                      |
| GO skeletal system development  | 15 | 125 | 0.0235015 | 7092 tolloid-like 1                                              |
| GO skeletal system development  | 15 | 125 | 0.0235015 | 7227 trichorhinophalangeal syndrome I                            |
| GO skeletal system development  | 15 | 125 | 0.0235015 | 8646 chordin                                                     |

|                                            |    |     |           |                                                                             |
|--------------------------------------------|----|-----|-----------|-----------------------------------------------------------------------------|
| GO skeletal system development             | 15 | 125 | 0.0235015 | 9060 3'-phosphoadenosine 5'-phosphosulfate synthase 2                       |
| GO response to peptide hormone stimuli     | 9  | 62  | 0.0243001 | 1080 cystic fibrosis transmembrane conductance regulator (ATP-binding cas:  |
| GO response to peptide hormone stimuli     | 9  | 62  | 0.0243001 | 1508 cathepsin B                                                            |
| GO response to peptide hormone stimuli     | 9  | 62  | 0.0243001 | 3570 interleukin 6 receptor                                                 |
| GO response to peptide hormone stimuli     | 9  | 62  | 0.0243001 | 3726 jun B proto-oncogene                                                   |
| GO response to peptide hormone stimuli     | 9  | 62  | 0.0243001 | 412 steroid sulfatase (microsomal), isozyme S                               |
| GO response to peptide hormone stimuli     | 9  | 62  | 0.0243001 | 5122 proprotein convertase subtilisin/kexin type 1                          |
| GO response to peptide hormone stimuli     | 9  | 62  | 0.0243001 | 5327 plasminogen activator, tissue                                          |
| GO response to peptide hormone stimuli     | 9  | 62  | 0.0243001 | 682 basigin (Ok blood group)                                                |
| GO response to peptide hormone stimuli     | 9  | 62  | 0.0243001 | 8013 nuclear receptor subfamily 4, group A, member 3                        |
| GO positive regulation of transcription fa | 5  | 25  | 0.0249642 | 10014 histone deacetylase 5                                                 |
| GO positive regulation of transcription fa | 5  | 25  | 0.0249642 | 10891 peroxisome proliferator-activated receptor gamma, coactivator 1 alpha |
| GO positive regulation of transcription fa | 5  | 25  | 0.0249642 | 2033 E1A binding protein p300                                               |
| GO positive regulation of transcription fa | 5  | 25  | 0.0249642 | 3169 forkhead box A1                                                        |
| GO positive regulation of transcription fa | 5  | 25  | 0.0249642 | 3569 interleukin 6 (interferon, beta 2)                                     |
| GO brown fat cell differentiation          | 5  | 25  | 0.0249642 | 10891 peroxisome proliferator-activated receptor gamma, coactivator 1 alpha |
| GO brown fat cell differentiation          | 5  | 25  | 0.0249642 | 116844 leucine-rich alpha-2-glycoprotein 1                                  |
| GO brown fat cell differentiation          | 5  | 25  | 0.0249642 | 154 adrenergic, beta-2-, receptor, surface                                  |
| GO brown fat cell differentiation          | 5  | 25  | 0.0249642 | 3914 laminin, beta 3                                                        |
| GO brown fat cell differentiation          | 5  | 25  | 0.0249642 | 4151 myoglobin                                                              |
| GO activation of JUN kinase activity       | 5  | 25  | 0.0249642 | 2205 Fc fragment of IgE, high affinity I, receptor for; alpha polypeptide   |
| GO activation of JUN kinase activity       | 5  | 25  | 0.0249642 | 4293 mitogen-activated protein kinase kinase kinase 9                       |
| GO activation of JUN kinase activity       | 5  | 25  | 0.0249642 | 6850 spleen tyrosine kinase                                                 |
| GO activation of JUN kinase activity       | 5  | 25  | 0.0249642 | 79444 baculoviral IAP repeat-containing 7                                   |
| GO activation of JUN kinase activity       | 5  | 25  | 0.0249642 | 9064 mitogen-activated protein kinase kinase kinase 6                       |
| GO organ morphogenesis                     | 14 | 115 | 0.0250801 | 10253 sprouty homolog 2 (Drosophila)                                        |
| GO organ morphogenesis                     | 14 | 115 | 0.0250801 | 157506 retinol dehydrogenase 10 (all-trans)                                 |
| GO organ morphogenesis                     | 14 | 115 | 0.0250801 | 1948 ephrin-B2                                                              |
| GO organ morphogenesis                     | 14 | 115 | 0.0250801 | 2033 E1A binding protein p300                                               |
| GO organ morphogenesis                     | 14 | 115 | 0.0250801 | 28959 transmembrane protein 176B                                            |
| GO organ morphogenesis                     | 14 | 115 | 0.0250801 | 3687 integrin, alpha X (complement component 3 receptor 4 subunit)          |
| GO organ morphogenesis                     | 14 | 115 | 0.0250801 | 3911 laminin, alpha 5                                                       |
| GO organ morphogenesis                     | 14 | 115 | 0.0250801 | 3983 actin binding LIM protein 1                                            |
| GO organ morphogenesis                     | 14 | 115 | 0.0250801 | 4853 Notch homolog 2 (Drosophila)                                           |
| GO organ morphogenesis                     | 14 | 115 | 0.0250801 | 5308 paired-like homeodomain 2                                              |
| GO organ morphogenesis                     | 14 | 115 | 0.0250801 | 6850 spleen tyrosine kinase                                                 |

|                                                           |    |     |           |                                                                                                |
|-----------------------------------------------------------|----|-----|-----------|------------------------------------------------------------------------------------------------|
| GO organ morphogenesis                                    | 14 | 115 | 0.0250801 | 7089 transducin-like enhancer of split 2 (E(sp1) homolog, Drosophila)                          |
| GO organ morphogenesis                                    | 14 | 115 | 0.0250801 | 7090 transducin-like enhancer of split 3 (E(sp1) homolog, Drosophila)                          |
| GO organ morphogenesis                                    | 14 | 115 | 0.0250801 | 8600 tumor necrosis factor (ligand) superfamily, member 11                                     |
| GO positive regulation of calcium-mediated signaling      | 4  | 17  | 0.0252293 | 2205 Fc fragment of IgE, high affinity I, receptor for; alpha polypeptide                      |
| GO positive regulation of calcium-mediated signaling      | 4  | 17  | 0.0252293 | 4684 neural cell adhesion molecule 1                                                           |
| GO positive regulation of calcium-mediated signaling      | 4  | 17  | 0.0252293 | 5025 purinergic receptor P2X, ligand-gated ion channel, 4                                      |
| GO positive regulation of calcium-mediated signaling      | 4  | 17  | 0.0252293 | 6850 spleen tyrosine kinase                                                                    |
| GO nitrogen compound metabolic process                    | 4  | 17  | 0.0252293 | 2752 glutamate-ammonia ligase (glutamine synthetase)                                           |
| GO nitrogen compound metabolic process                    | 4  | 17  | 0.0252293 | 4817 nitrilase 1                                                                               |
| GO nitrogen compound metabolic process                    | 4  | 17  | 0.0252293 | 84159 AT rich interactive domain 5B (MRF1-like)                                                |
| GO nitrogen compound metabolic process                    | 4  | 17  | 0.0252293 | 8875 vanin 2                                                                                   |
| GO endoderm development                                   | 4  | 17  | 0.0252293 | 3175 one cut homeobox 1                                                                        |
| GO endoderm development                                   | 4  | 17  | 0.0252293 | 4087 SMAD family member 2                                                                      |
| GO endoderm development                                   | 4  | 17  | 0.0252293 | 4851 Notch homolog 1, translocation-associated (Drosophila)                                    |
| GO endoderm development                                   | 4  | 17  | 0.0252293 | 5083 paired box 9                                                                              |
| GO 1-acylglycerophosphocholine O-acyltransferase activity | 2  | 4   | 0.0255251 | 10162 lysophosphatidylcholine acyltransferase 3                                                |
| GO 1-acylglycerophosphocholine O-acyltransferase activity | 2  | 4   | 0.0255251 | 54947 lysophosphatidylcholine acyltransferase 2                                                |
| GO proton-transporting two-sector ATPase activity         | 2  | 4   | 0.0255251 | 10312 T-cell, immune regulator 1, ATPase, H+ transporting, lysosomal V0 subunit                |
| GO proton-transporting two-sector ATPase activity         | 2  | 4   | 0.0255251 | 50617 ATPase, H+ transporting, lysosomal V0 subunit a4                                         |
| GO positive regulation of fatty acid oxidation            | 2  | 4   | 0.0255251 | 10891 peroxisome proliferator-activated receptor gamma, coactivator 1 alpha                    |
| GO positive regulation of fatty acid oxidation            | 2  | 4   | 0.0255251 | 5465 peroxisome proliferator-activated receptor alpha                                          |
| GO MyD88-dependent toll-like receptor signaling pathway   | 2  | 4   | 0.0255251 | 11213 interleukin-1 receptor-associated kinase 3                                               |
| GO MyD88-dependent toll-like receptor signaling pathway   | 2  | 4   | 0.0255251 | 7097 toll-like receptor 2                                                                      |
| GO alcohol dehydrogenase activity, zinc-dependent         | 2  | 4   | 0.0255251 | 124 alcohol dehydrogenase 1A (class I), alpha polypeptide                                      |
| GO alcohol dehydrogenase activity, zinc-dependent         | 2  | 4   | 0.0255251 | 125 alcohol dehydrogenase 1B (class I), beta polypeptide                                       |
| GO glial cell migration                                   | 2  | 4   | 0.0255251 | 1462 versican                                                                                  |
| GO glial cell migration                                   | 2  | 4   | 0.0255251 | 4692 necdin homolog (mouse)                                                                    |
| GO phospholipid translocation                             | 2  | 4   | 0.0255251 | 148229 ATPase, class I, type 8B, member 3                                                      |
| GO phospholipid translocation                             | 2  | 4   | 0.0255251 | 3783 potassium intermediate/small conductance calcium-activated channel, subfamily A, member 1 |
| GO caffeine oxidase activity                              | 2  | 4   | 0.0255251 | 1558 cytochrome P450, family 2, subfamily C, polypeptide 8                                     |
| GO caffeine oxidase activity                              | 2  | 4   | 0.0255251 | 1559 cytochrome P450, family 2, subfamily C, polypeptide 9                                     |
| GO drug catabolic process                                 | 2  | 4   | 0.0255251 | 1559 cytochrome P450, family 2, subfamily C, polypeptide 9                                     |
| GO drug catabolic process                                 | 2  | 4   | 0.0255251 | 1577 cytochrome P450, family 3, subfamily A, polypeptide 5                                     |
| GO Gram-positive bacterial cell surface biogenesis        | 2  | 4   | 0.0255251 | 1755 deleted in malignant brain tumors 1                                                       |
| GO Gram-positive bacterial cell surface biogenesis        | 2  | 4   | 0.0255251 | 7097 toll-like receptor 2                                                                      |
| GO intercellular canaliculus                              | 2  | 4   | 0.0255251 | 1803 dipeptidyl-peptidase 4                                                                    |

|    |                                        |   |   |           |                                                                               |
|----|----------------------------------------|---|---|-----------|-------------------------------------------------------------------------------|
| GO | intercellular canaliculus              | 2 | 4 | 0.0255251 | 5244 ATP-binding cassette, sub-family B (MDR/TAP), member 4                   |
| GO | behavioral response to ethanol         | 2 | 4 | 0.0255251 | 1813 dopamine receptor D2                                                     |
| GO | behavioral response to ethanol         | 2 | 4 | 0.0255251 | 1815 dopamine receptor D4                                                     |
| GO | cerebral cortex GABAergic interneurc   | 2 | 4 | 0.0255251 | 1813 dopamine receptor D2                                                     |
| GO | cerebral cortex GABAergic interneurc   | 2 | 4 | 0.0255251 | 26468 LIM homeobox 6                                                          |
| GO | dopamine receptor activity             | 2 | 4 | 0.0255251 | 1813 dopamine receptor D2                                                     |
| GO | dopamine receptor activity             | 2 | 4 | 0.0255251 | 1815 dopamine receptor D4                                                     |
| GO | cellular sodium ion homeostasis        | 2 | 4 | 0.0255251 | 183 angiotensinogen (serpin peptidase inhibitor, clade A, member 8)           |
| GO | cellular sodium ion homeostasis        | 2 | 4 | 0.0255251 | 64699 transmembrane protease, serine 3                                        |
| GO | positive regulation of cardiac muscle  | 2 | 4 | 0.0255251 | 183 angiotensinogen (serpin peptidase inhibitor, clade A, member 8)           |
| GO | positive regulation of cardiac muscle  | 2 | 4 | 0.0255251 | 1906 endothelin 1                                                             |
| GO | regulation of blood volume by renin-i  | 2 | 4 | 0.0255251 | 183 angiotensinogen (serpin peptidase inhibitor, clade A, member 8)           |
| GO | regulation of blood volume by renin-i  | 2 | 4 | 0.0255251 | 5972 renin                                                                    |
| GO | bioluminescence                        | 2 | 4 | 0.0255251 | 22795 nidogen 2 (osteonidogen)                                                |
| GO | bioluminescence                        | 2 | 4 | 0.0255251 | 83872 hemicentin 1                                                            |
| GO | hindgut morphogenesis                  | 2 | 4 | 0.0255251 | 2737 GLI family zinc finger 3                                                 |
| GO | hindgut morphogenesis                  | 2 | 4 | 0.0255251 | 7474 wingless-type MMTV integration site family, member 5A                    |
| GO | head morphogenesis                     | 2 | 4 | 0.0255251 | 28982 feline leukemia virus subgroup C cellular receptor 1                    |
| GO | head morphogenesis                     | 2 | 4 | 0.0255251 | 29123 ankyrin repeat domain 11                                                |
| GO | monocyte chemotaxis                    | 2 | 4 | 0.0255251 | 3569 interleukin 6 (interferon, beta 2)                                       |
| GO | monocyte chemotaxis                    | 2 | 4 | 0.0255251 | 3570 interleukin 6 receptor                                                   |
| GO | negative regulation of collagen biosyn | 2 | 4 | 0.0255251 | 3569 interleukin 6 (interferon, beta 2)                                       |
| GO | negative regulation of collagen biosyn | 2 | 4 | 0.0255251 | 3570 interleukin 6 receptor                                                   |
| GO | carbon dioxide transport               | 2 | 4 | 0.0255251 | 358 aquaporin 1 (Colton blood group)                                          |
| GO | carbon dioxide transport               | 2 | 4 | 0.0255251 | 760 carbonic anhydrase II                                                     |
| GO | cellular response to dexamethasone :   | 2 | 4 | 0.0255251 | 358 aquaporin 1 (Colton blood group)                                          |
| GO | cellular response to dexamethasone :   | 2 | 4 | 0.0255251 | 652 bone morphogenetic protein 4                                              |
| GO | plasma membrane organization           | 2 | 4 | 0.0255251 | 375790 agrin                                                                  |
| GO | plasma membrane organization           | 2 | 4 | 0.0255251 | 53947 alpha 1,4-galactosyltransferase                                         |
| GO | fibril                                 | 2 | 4 | 0.0255251 | 4586 mucin 5AC, oligomeric mucus/gel-forming                                  |
| GO | fibril                                 | 2 | 4 | 0.0255251 | 6622 synuclein, alpha (non A4 component of amyloid precursor)                 |
| GO | negative regulation of myeloid cell di | 2 | 4 | 0.0255251 | 4792 nuclear factor of kappa light polypeptide gene enhancer in B-cells inhib |
| GO | negative regulation of myeloid cell di | 2 | 4 | 0.0255251 | 7538 zinc finger protein 36, C3H type, homolog (mouse)                        |
| GO | nucleotide-binding oligomerization d   | 2 | 4 | 0.0255251 | 4792 nuclear factor of kappa light polypeptide gene enhancer in B-cells inhib |
| GO | nucleotide-binding oligomerization d   | 2 | 4 | 0.0255251 | 64127 nucleotide-binding oligomerization domain containing 2                  |
| GO | response to muramyl dipeptide          | 2 | 4 | 0.0255251 | 4792 nuclear factor of kappa light polypeptide gene enhancer in B-cells inhib |



|                                            |   |    |           |                                                                           |
|--------------------------------------------|---|----|-----------|---------------------------------------------------------------------------|
| GO response to muramyl dipeptide           | 2 | 4  | 0.0255251 | 64127 nucleotide-binding oligomerization domain containing 2              |
| GO peptide YY receptor activity            | 2 | 4  | 0.0255251 | 4886 neuropeptide Y receptor Y1                                           |
| GO peptide YY receptor activity            | 2 | 4  | 0.0255251 | 4889 neuropeptide Y receptor Y5                                           |
| GO regulation of Wnt receptor signaling    | 2 | 4  | 0.0255251 | 5218 cyclin-dependent kinase 14                                           |
| GO regulation of Wnt receptor signaling    | 2 | 4  | 0.0255251 | 83595 SRY (sex determining region Y)-box 7                                |
| GO negative regulation of appetite         | 2 | 4  | 0.0255251 | 5465 peroxisome proliferator-activated receptor alpha                     |
| GO negative regulation of appetite         | 2 | 4  | 0.0255251 | 885 cholecystokinin                                                       |
| GO negative regulation of sequestering c   | 2 | 4  | 0.0255251 | 5465 peroxisome proliferator-activated receptor alpha                     |
| GO negative regulation of sequestering c   | 2 | 4  | 0.0255251 | 57104 patatin-like phospholipase domain containing 2                      |
| GO negative regulation of membrane pro     | 2 | 4  | 0.0255251 | 5774 protein tyrosine phosphatase, non-receptor type 3                    |
| GO negative regulation of membrane pro     | 2 | 4  | 0.0255251 | 7076 TIMP metalloproteinase inhibitor 1                                   |
| GO urinary bladder development             | 2 | 4  | 0.0255251 | 5950 retinol binding protein 4, plasma                                    |
| GO urinary bladder development             | 2 | 4  | 0.0255251 | 7474 wingless-type MMTV integration site family, member 5A                |
| GO peptide:hydrogen symporter activity     | 2 | 4  | 0.0255251 | 6564 solute carrier family 15 (oligopeptide transporter), member 1        |
| GO peptide:hydrogen symporter activity     | 2 | 4  | 0.0255251 | 6565 solute carrier family 15 (H+/peptide transporter), member 2          |
| GO cobalamin transport                     | 2 | 4  | 0.0255251 | 6947 transcobalamin I (vitamin B12 binding protein, R binder family)      |
| GO cobalamin transport                     | 2 | 4  | 0.0255251 | 6948 transcobalamin II; macrocytic anemia                                 |
| GO positive regulation of nitric-oxide syn | 2 | 4  | 0.0255251 | 7097 toll-like receptor 2                                                 |
| GO positive regulation of nitric-oxide syn | 2 | 4  | 0.0255251 | 7099 toll-like receptor 4                                                 |
| GO lipopolysaccharide receptor complex     | 2 | 4  | 0.0255251 | 7099 toll-like receptor 4                                                 |
| GO lipopolysaccharide receptor complex     | 2 | 4  | 0.0255251 | 929 CD14 molecule                                                         |
| GO positive regulation of bone resorptio   | 2 | 4  | 0.0255251 | 760 carbonic anhydrase II                                                 |
| GO positive regulation of bone resorptio   | 2 | 4  | 0.0255251 | 8600 tumor necrosis factor (ligand) superfamily, member 11                |
| GO activation of MAPK activity             | 8 | 53 | 0.0265222 | 1139 cholinergic receptor, nicotinic, alpha 7                             |
| GO activation of MAPK activity             | 8 | 53 | 0.0265222 | 1815 dopamine receptor D4                                                 |
| GO activation of MAPK activity             | 8 | 53 | 0.0265222 | 2911 glutamate receptor, metabotropic 1                                   |
| GO activation of MAPK activity             | 8 | 53 | 0.0265222 | 3643 insulin receptor                                                     |
| GO activation of MAPK activity             | 8 | 53 | 0.0265222 | 5608 mitogen-activated protein kinase kinase 6                            |
| GO activation of MAPK activity             | 8 | 53 | 0.0265222 | 7001 peroxiredoxin 2                                                      |
| GO activation of MAPK activity             | 8 | 53 | 0.0265222 | 7099 toll-like receptor 4                                                 |
| GO activation of MAPK activity             | 8 | 53 | 0.0265222 | 7852 chemokine (C-X-C motif) receptor 4                                   |
| GO dopamine metabolic process              | 3 | 10 | 0.026582  | 1813 dopamine receptor D2                                                 |
| GO dopamine metabolic process              | 3 | 10 | 0.026582  | 1815 dopamine receptor D4                                                 |
| GO dopamine metabolic process              | 3 | 10 | 0.026582  | 5071 Parkinson disease (autosomal recessive, juvenile) 2, parkin          |
| GO prostaglandin biosynthetic process      | 3 | 10 | 0.026582  | 1906 endothelin 1                                                         |
| GO prostaglandin biosynthetic process      | 3 | 10 | 0.026582  | 5742 prostaglandin-endoperoxide synthase 1 (prostaglandin G/H synthase a) |

|                                         |    |     |           |                                                                                |
|-----------------------------------------|----|-----|-----------|--------------------------------------------------------------------------------|
| GO prostaglandin biosynthetic process   | 3  | 10  | 0.026582  | 6916 thromboxane A synthase 1 (platelet)                                       |
| GO fatty acid transport                 | 3  | 10  | 0.026582  | 2182 acyl-CoA synthetase long-chain family member 4                            |
| GO fatty acid transport                 | 3  | 10  | 0.026582  | 51703 acyl-CoA synthetase long-chain family member 5                           |
| GO fatty acid transport                 | 3  | 10  | 0.026582  | 5465 peroxisome proliferator-activated receptor alpha                          |
| GO R-SMAD binding                       | 3  | 10  | 0.026582  | 2353 FBJ murine osteosarcoma viral oncogene homolog                            |
| GO R-SMAD binding                       | 3  | 10  | 0.026582  | 3725 jun oncogene                                                              |
| GO R-SMAD binding                       | 3  | 10  | 0.026582  | 4087 SMAD family member 2                                                      |
| GO prostate gland epithelium morphoge   | 3  | 10  | 0.026582  | 3169 forkhead box A1                                                           |
| GO prostate gland epithelium morphoge   | 3  | 10  | 0.026582  | 3479 insulin-like growth factor 1 (somatomedin C)                              |
| GO prostate gland epithelium morphoge   | 3  | 10  | 0.026582  | 4851 Notch homolog 1, translocation-associated (Drosophila)                    |
| GO defense response to Gram-negative b  | 3  | 10  | 0.026582  | 3569 interleukin 6 (interferon, beta 2)                                        |
| GO defense response to Gram-negative b  | 3  | 10  | 0.026582  | 3570 interleukin 6 receptor                                                    |
| GO defense response to Gram-negative b  | 3  | 10  | 0.026582  | 7099 toll-like receptor 4                                                      |
| GO phosphoinositide 3-kinase binding    | 3  | 10  | 0.026582  | 3643 insulin receptor                                                          |
| GO phosphoinositide 3-kinase binding    | 3  | 10  | 0.026582  | 7099 toll-like receptor 4                                                      |
| GO phosphoinositide 3-kinase binding    | 3  | 10  | 0.026582  | 8660 insulin receptor substrate 2                                              |
| GO metalloendopeptidase inhibitor activ | 3  | 10  | 0.026582  | 50859 sparco/osteonectin, cwcv and kazal-like domains proteoglycan (testican)  |
| GO metalloendopeptidase inhibitor activ | 3  | 10  | 0.026582  | 7076 TIMP metallopeptidase inhibitor 1                                         |
| GO metalloendopeptidase inhibitor activ | 3  | 10  | 0.026582  | 8434 reversion-inducing-cysteine-rich protein with kazal motifs                |
| GO response to virus                    | 13 | 105 | 0.0266736 | 10346 tripartite motif-containing 22                                           |
| GO response to virus                    | 13 | 105 | 0.0266736 | 10561 interferon-induced protein 44                                            |
| GO response to virus                    | 13 | 105 | 0.0266736 | 11213 interleukin-1 receptor-associated kinase 3                               |
| GO response to virus                    | 13 | 105 | 0.0266736 | 1755 deleted in malignant brain tumors 1                                       |
| GO response to virus                    | 13 | 105 | 0.0266736 | 3428 interferon, gamma-inducible protein 16                                    |
| GO response to virus                    | 13 | 105 | 0.0266736 | 3665 interferon regulatory factor 7                                            |
| GO response to virus                    | 13 | 105 | 0.0266736 | 4486 macrophage stimulating 1 receptor (c-met-related tyrosine kinase)         |
| GO response to virus                    | 13 | 105 | 0.0266736 | 4599 myxovirus (influenza virus) resistance 1, interferon-inducible protein p1 |
| GO response to virus                    | 13 | 105 | 0.0266736 | 4600 myxovirus (influenza virus) resistance 2 (mouse)                          |
| GO response to virus                    | 13 | 105 | 0.0266736 | 64135 interferon induced with helicase C domain 1                              |
| GO response to virus                    | 13 | 105 | 0.0266736 | 684 bone marrow stromal cell antigen 2                                         |
| GO response to virus                    | 13 | 105 | 0.0266736 | 7706 tripartite motif-containing 25                                            |
| GO response to virus                    | 13 | 105 | 0.0266736 | 7852 chemokine (C-X-C motif) receptor 4                                        |
| GO peptidase activity                   | 43 | 465 | 0.0268423 | 10942 protease, serine, 21 (testisin)                                          |
| GO peptidase activity                   | 43 | 465 | 0.0268423 | 11202 kallikrein-related peptidase 8                                           |
| GO peptidase activity                   | 43 | 465 | 0.0268423 | 121665 signal peptide peptidase 3                                              |
| GO peptidase activity                   | 43 | 465 | 0.0268423 | 1363 carboxypeptidase E                                                        |

|    |                    |    |     |           |        |                                                                           |
|----|--------------------|----|-----|-----------|--------|---------------------------------------------------------------------------|
| GO | peptidase activity | 43 | 465 | 0.0268423 | 1368   | carboxypeptidase M                                                        |
| GO | peptidase activity | 43 | 465 | 0.0268423 | 1508   | cathepsin B                                                               |
| GO | peptidase activity | 43 | 465 | 0.0268423 | 1519   | cathepsin O                                                               |
| GO | peptidase activity | 43 | 465 | 0.0268423 | 1540   | cylindromatosis (turban tumor syndrome)                                   |
| GO | peptidase activity | 43 | 465 | 0.0268423 | 170692 | ADAM metallopeptidase with thrombospondin type 1 motif, 18                |
| GO | peptidase activity | 43 | 465 | 0.0268423 | 1803   | dipeptidyl-peptidase 4                                                    |
| GO | peptidase activity | 43 | 465 | 0.0268423 | 255738 | proprotein convertase subtilisin/kexin type 9                             |
| GO | peptidase activity | 43 | 465 | 0.0268423 | 25825  | beta-site APP-cleaving enzyme 2                                           |
| GO | peptidase activity | 43 | 465 | 0.0268423 | 25862  | ubiquitin specific peptidase 49                                           |
| GO | peptidase activity | 43 | 465 | 0.0268423 | 388743 | calpain 8                                                                 |
| GO | peptidase activity | 43 | 465 | 0.0268423 | 4316   | matrix metallopeptidase 7 (matrilysin, uterine)                           |
| GO | peptidase activity | 43 | 465 | 0.0268423 | 5046   | proprotein convertase subtilisin/kexin type 6                             |
| GO | peptidase activity | 43 | 465 | 0.0268423 | 5122   | proprotein convertase subtilisin/kexin type 1                             |
| GO | peptidase activity | 43 | 465 | 0.0268423 | 51279  | complement component 1, r subcomponent-like                               |
| GO | peptidase activity | 43 | 465 | 0.0268423 | 5327   | plasminogen activator, tissue                                             |
| GO | peptidase activity | 43 | 465 | 0.0268423 | 54504  | carboxypeptidase, vitellogenic-like                                       |
| GO | peptidase activity | 43 | 465 | 0.0268423 | 54933  | rhomboid, veinlet-like 2 ( <i>Drosophila</i> )                            |
| GO | peptidase activity | 43 | 465 | 0.0268423 | 55432  | YOD1 OTU deubiquinating enzyme 1 homolog ( <i>S. cerevisiae</i> )         |
| GO | peptidase activity | 43 | 465 | 0.0268423 | 5648   | mannan-binding lectin serine peptidase 1 (C4/C2 activating component)     |
| GO | peptidase activity | 43 | 465 | 0.0268423 | 56547  | matrix metallopeptidase 26                                                |
| GO | peptidase activity | 43 | 465 | 0.0268423 | 5655   | kallikrein-related peptidase 10                                           |
| GO | peptidase activity | 43 | 465 | 0.0268423 | 56649  | transmembrane protease, serine 4                                          |
| GO | peptidase activity | 43 | 465 | 0.0268423 | 5696   | proteasome (prosome, macropain) subunit, beta type, 8 (large multifur)    |
| GO | peptidase activity | 43 | 465 | 0.0268423 | 5698   | proteasome (prosome, macropain) subunit, beta type, 9 (large multifur)    |
| GO | peptidase activity | 43 | 465 | 0.0268423 | 5699   | proteasome (prosome, macropain) subunit, beta type, 10                    |
| GO | peptidase activity | 43 | 465 | 0.0268423 | 57094  | carboxypeptidase A6                                                       |
| GO | peptidase activity | 43 | 465 | 0.0268423 | 5972   | renin                                                                     |
| GO | peptidase activity | 43 | 465 | 0.0268423 | 629    | complement factor B                                                       |
| GO | peptidase activity | 43 | 465 | 0.0268423 | 64699  | transmembrane protease, serine 3                                          |
| GO | peptidase activity | 43 | 465 | 0.0268423 | 7092   | tolloid-like 1                                                            |
| GO | peptidase activity | 43 | 465 | 0.0268423 | 715    | complement component 1, r subcomponent                                    |
| GO | peptidase activity | 43 | 465 | 0.0268423 | 717    | complement component 2                                                    |
| GO | peptidase activity | 43 | 465 | 0.0268423 | 726    | calpain 5                                                                 |
| GO | peptidase activity | 43 | 465 | 0.0268423 | 79956  | endoplasmic reticulum metallopeptidase 1                                  |
| GO | peptidase activity | 43 | 465 | 0.0268423 | 834    | caspase 1, apoptosis-related cysteine peptidase (interleukin 1, beta, co) |
| GO | peptidase activity | 43 | 465 | 0.0268423 | 837    | caspase 4, apoptosis-related cysteine peptidase                           |

|    |                    |     |      |           |        |                                                                    |
|----|--------------------|-----|------|-----------|--------|--------------------------------------------------------------------|
| GO | peptidase activity | 43  | 465  | 0.0268423 | 8722   | cathepsin F                                                        |
| GO | peptidase activity | 43  | 465  | 0.0268423 | 8751   | ADAM metallopeptidase domain 15                                    |
| GO | peptidase activity | 43  | 465  | 0.0268423 | 9510   | ADAM metallopeptidase with thrombospondin type 1 motif, 1          |
| GO | sugar binding      | 18  | 161  | 0.0268651 | 124220 | zymogen granule protein 16 homolog B (rat)                         |
| GO | sugar binding      | 18  | 161  | 0.0268651 | 1462   | versican                                                           |
| GO | sugar binding      | 18  | 161  | 0.0268651 | 202    | absent in melanoma 1                                               |
| GO | sugar binding      | 18  | 161  | 0.0268651 | 22859  | latrophilin 1                                                      |
| GO | sugar binding      | 18  | 161  | 0.0268651 | 22925  | phospholipase A2 receptor 1, 180kDa                                |
| GO | sugar binding      | 18  | 161  | 0.0268651 | 23266  | latrophilin 2                                                      |
| GO | sugar binding      | 18  | 161  | 0.0268651 | 23284  | latrophilin 3                                                      |
| GO | sugar binding      | 18  | 161  | 0.0268651 | 2517   | fucosidase, alpha-L- 1, tissue                                     |
| GO | sugar binding      | 18  | 161  | 0.0268651 | 2589   | UDP-N-acetyl-alpha-D-galactosamine:polypeptide N-acetylgalactosami |
| GO | sugar binding      | 18  | 161  | 0.0268651 | 374378 | UDP-N-acetyl-alpha-D-galactosamine:polypeptide N-acetylgalactosami |
| GO | sugar binding      | 18  | 161  | 0.0268651 | 3823   | killer cell lectin-like receptor subfamily C, member 3             |
| GO | sugar binding      | 18  | 161  | 0.0268651 | 3958   | lectin, galactoside-binding, soluble, 3                            |
| GO | sugar binding      | 18  | 161  | 0.0268651 | 4065   | lymphocyte antigen 75                                              |
| GO | sugar binding      | 18  | 161  | 0.0268651 | 55600  | intelectin 1 (galactofuranose binding)                             |
| GO | sugar binding      | 18  | 161  | 0.0268651 | 59271  | chromosome 21 open reading frame 63                                |
| GO | sugar binding      | 18  | 161  | 0.0268651 | 6402   | selectin L                                                         |
| GO | sugar binding      | 18  | 161  | 0.0268651 | 682    | basigin (Ok blood group)                                           |
| GO | sugar binding      | 18  | 161  | 0.0268651 | 79695  | UDP-N-acetyl-alpha-D-galactosamine:polypeptide N-acetylgalactosami |
| GO | protein binding    | 459 | 6249 | 0.0278374 | 10014  | histone deacetylase 5                                              |
| GO | protein binding    | 459 | 6249 | 0.0278374 | 10076  | protein tyrosine phosphatase, receptor type, U                     |
| GO | protein binding    | 459 | 6249 | 0.0278374 | 1009   | cadherin 11, type 2, OB-cadherin (osteoblast)                      |
| GO | protein binding    | 459 | 6249 | 0.0278374 | 10116  | fem-1 homolog b (C. elegans)                                       |
| GO | protein binding    | 459 | 6249 | 0.0278374 | 10140  | transducer of ERBB2, 1                                             |
| GO | protein binding    | 459 | 6249 | 0.0278374 | 10216  | proteoglycan 4                                                     |
| GO | protein binding    | 459 | 6249 | 0.0278374 | 10221  | tribbles homolog 1 (Drosophila)                                    |
| GO | protein binding    | 459 | 6249 | 0.0278374 | 10252  | sprouty homolog 1, antagonist of FGF signaling (Drosophila)        |
| GO | protein binding    | 459 | 6249 | 0.0278374 | 10253  | sprouty homolog 2 (Drosophila)                                     |
| GO | protein binding    | 459 | 6249 | 0.0278374 | 10282  | blocked early in transport 1 homolog (S. cerevisiae)               |
| GO | protein binding    | 459 | 6249 | 0.0278374 | 10346  | tripartite motif-containing 22                                     |
| GO | protein binding    | 459 | 6249 | 0.0278374 | 10397  | N-myc downstream regulated 1                                       |
| GO | protein binding    | 459 | 6249 | 0.0278374 | 10418  | spondin 1, extracellular matrix protein                            |
| GO | protein binding    | 459 | 6249 | 0.0278374 | 10435  | CDC42 effector protein (Rho GTPase binding) 2                      |
| GO | protein binding    | 459 | 6249 | 0.0278374 | 10439  | olfactomedin 1                                                     |

|                    |     |      |           |                                                                             |
|--------------------|-----|------|-----------|-----------------------------------------------------------------------------|
| GO protein binding | 459 | 6249 | 0.0278374 | 10481 homeobox B13                                                          |
| GO protein binding | 459 | 6249 | 0.0278374 | 10628 thioredoxin interacting protein                                       |
| GO protein binding | 459 | 6249 | 0.0278374 | 10769 polo-like kinase 2 (Drosophila)                                       |
| GO protein binding | 459 | 6249 | 0.0278374 | 1080 cystic fibrosis transmembrane conductance regulator (ATP-binding cas   |
| GO protein binding | 459 | 6249 | 0.0278374 | 10811 NADPH oxidase activator 1                                             |
| GO protein binding | 459 | 6249 | 0.0278374 | 10891 peroxisome proliferator-activated receptor gamma, coactivator 1 alpha |
| GO protein binding | 459 | 6249 | 0.0278374 | 10906 TRAF-type zinc finger domain containing 1                             |
| GO protein binding | 459 | 6249 | 0.0278374 | 10912 growth arrest and DNA-damage-inducible, gamma                         |
| GO protein binding | 459 | 6249 | 0.0278374 | 10913 ectodysplasin A receptor                                              |
| GO protein binding | 459 | 6249 | 0.0278374 | 11030 RNA binding protein with multiple splicing                            |
| GO protein binding | 459 | 6249 | 0.0278374 | 11043 midline 2                                                             |
| GO protein binding | 459 | 6249 | 0.0278374 | 11074 tripartite motif-containing 31                                        |
| GO protein binding | 459 | 6249 | 0.0278374 | 11078 TRIO and F-actin binding protein                                      |
| GO protein binding | 459 | 6249 | 0.0278374 | 1114 chromogranin B (secretogranin 1)                                       |
| GO protein binding | 459 | 6249 | 0.0278374 | 11147 HERV-H LTR-associating 3                                              |
| GO protein binding | 459 | 6249 | 0.0278374 | 11155 LIM domain binding 3                                                  |
| GO protein binding | 459 | 6249 | 0.0278374 | 11156 protein tyrosine phosphatase type IVA, member 3                       |
| GO protein binding | 459 | 6249 | 0.0278374 | 112 adenylate cyclase 6                                                     |
| GO protein binding | 459 | 6249 | 0.0278374 | 11200 CHK2 checkpoint homolog (S. pombe)                                    |
| GO protein binding | 459 | 6249 | 0.0278374 | 11202 kallikrein-related peptidase 8                                        |
| GO protein binding | 459 | 6249 | 0.0278374 | 11213 interleukin-1 receptor-associated kinase 3                            |
| GO protein binding | 459 | 6249 | 0.0278374 | 1124 chimerin (chimaerin) 2                                                 |
| GO protein binding | 459 | 6249 | 0.0278374 | 112574 sorting nexin 18                                                     |
| GO protein binding | 459 | 6249 | 0.0278374 | 113263 glucocorticoid induced transcript 1                                  |
| GO protein binding | 459 | 6249 | 0.0278374 | 113278 chromosome 20 open reading frame 54                                  |
| GO protein binding | 459 | 6249 | 0.0278374 | 1139 cholinergic receptor, nicotinic, alpha 7                               |
| GO protein binding | 459 | 6249 | 0.0278374 | 114569 mal, T-cell differentiation protein 2                                |
| GO protein binding | 459 | 6249 | 0.0278374 | 1152 creatine kinase, brain                                                 |
| GO protein binding | 459 | 6249 | 0.0278374 | 1154 cytokine inducible SH2-containing protein                              |
| GO protein binding | 459 | 6249 | 0.0278374 | 116071 basic leucine zipper transcription factor, ATF-like 2                |
| GO protein binding | 459 | 6249 | 0.0278374 | 116844 leucine-rich alpha-2-glycoprotein 1                                  |
| GO protein binding | 459 | 6249 | 0.0278374 | 117157 SH2 domain containing 1B                                             |
| GO protein binding | 459 | 6249 | 0.0278374 | 118429 anthrax toxin receptor 2                                             |
| GO protein binding | 459 | 6249 | 0.0278374 | 118987 PDZ domain containing 8                                              |
| GO protein binding | 459 | 6249 | 0.0278374 | 121227 leucine-rich repeats and immunoglobulin-like domains 3               |
| GO protein binding | 459 | 6249 | 0.0278374 | 123 perilipin 2                                                             |

|                    |     |      |           |                                                                         |
|--------------------|-----|------|-----------|-------------------------------------------------------------------------|
| GO protein binding | 459 | 6249 | 0.0278374 | 124 alcohol dehydrogenase 1A (class I), alpha polypeptide               |
| GO protein binding | 459 | 6249 | 0.0278374 | 126147 netrin 5                                                         |
| GO protein binding | 459 | 6249 | 0.0278374 | 127933 U2AF homology motif (UHM) kinase 1                               |
| GO protein binding | 459 | 6249 | 0.0278374 | 135112 nuclear receptor coactivator 7                                   |
| GO protein binding | 459 | 6249 | 0.0278374 | 135644 tripartite motif-containing 40                                   |
| GO protein binding | 459 | 6249 | 0.0278374 | 1363 carboxypeptidase E                                                 |
| GO protein binding | 459 | 6249 | 0.0278374 | 1373 carbamoyl-phosphate synthetase 1, mitochondrial                    |
| GO protein binding | 459 | 6249 | 0.0278374 | 143098 membrane protein, palmitoylated 7 (MAGUK p55 subfamily member 7) |
| GO protein binding | 459 | 6249 | 0.0278374 | 143425 synaptotagmin IX                                                 |
| GO protein binding | 459 | 6249 | 0.0278374 | 1435 colony stimulating factor 1 (macrophage)                           |
| GO protein binding | 459 | 6249 | 0.0278374 | 144699 F-box and leucine-rich repeat protein 14                         |
| GO protein binding | 459 | 6249 | 0.0278374 | 145581 leucine rich repeat and fibronectin type III domain containing 5 |
| GO protein binding | 459 | 6249 | 0.0278374 | 147945 NLR family, pyrin domain containing 4                            |
| GO protein binding | 459 | 6249 | 0.0278374 | 148170 CDC42 effector protein (Rho GTPase binding) 5                    |
| GO protein binding | 459 | 6249 | 0.0278374 | 150094 salt-inducible kinase 1                                          |
| GO protein binding | 459 | 6249 | 0.0278374 | 1508 cathepsin B                                                        |
| GO protein binding | 459 | 6249 | 0.0278374 | 151636 deltex 3-like (Drosophila)                                       |
| GO protein binding | 459 | 6249 | 0.0278374 | 151827 leucine rich repeat containing 34                                |
| GO protein binding | 459 | 6249 | 0.0278374 | 154 adrenergic, beta-2-, receptor, surface                              |
| GO protein binding | 459 | 6249 | 0.0278374 | 1540 cylindromatosis (turban tumor syndrome)                            |
| GO protein binding | 459 | 6249 | 0.0278374 | 154043 CNKSR family member 3                                            |
| GO protein binding | 459 | 6249 | 0.0278374 | 154810 angiomin like 1                                                  |
| GO protein binding | 459 | 6249 | 0.0278374 | 157638 family with sequence similarity 84, member B                     |
| GO protein binding | 459 | 6249 | 0.0278374 | 158038 leucine rich repeat and Ig domain containing 2                   |
| GO protein binding | 459 | 6249 | 0.0278374 | 159195 ubiquitin specific peptidase 54                                  |
| GO protein binding | 459 | 6249 | 0.0278374 | 1612 death-associated protein kinase 1                                  |
| GO protein binding | 459 | 6249 | 0.0278374 | 163590 torsin A interacting protein 2                                   |
| GO protein binding | 459 | 6249 | 0.0278374 | 165679 chromosome 3 open reading frame 57                               |
| GO protein binding | 459 | 6249 | 0.0278374 | 168667 BMP binding endothelial regulator                                |
| GO protein binding | 459 | 6249 | 0.0278374 | 1741 discs, large homolog 3 (Drosophila)                                |
| GO protein binding | 459 | 6249 | 0.0278374 | 1785 dynamin 2                                                          |
| GO protein binding | 459 | 6249 | 0.0278374 | 1803 dipeptidyl-peptidase 4                                             |
| GO protein binding | 459 | 6249 | 0.0278374 | 1813 dopamine receptor D2                                               |
| GO protein binding | 459 | 6249 | 0.0278374 | 1815 dopamine receptor D4                                               |
| GO protein binding | 459 | 6249 | 0.0278374 | 1820 AT rich interactive domain 3A (BRIGHT-like)                        |
| GO protein binding | 459 | 6249 | 0.0278374 | 1821 dystrophin related protein 2                                       |

|                    |     |      |           |                                                                                |
|--------------------|-----|------|-----------|--------------------------------------------------------------------------------|
| GO protein binding | 459 | 6249 | 0.0278374 | 1822 atrophin 1                                                                |
| GO protein binding | 459 | 6249 | 0.0278374 | 1843 dual specificity phosphatase 1                                            |
| GO protein binding | 459 | 6249 | 0.0278374 | 1902 lysophosphatidic acid receptor 1                                          |
| GO protein binding | 459 | 6249 | 0.0278374 | 1915 eukaryotic translation elongation factor 1 alpha 1                        |
| GO protein binding | 459 | 6249 | 0.0278374 | 1958 early growth response 1                                                   |
| GO protein binding | 459 | 6249 | 0.0278374 | 1959 early growth response 2                                                   |
| GO protein binding | 459 | 6249 | 0.0278374 | 1969 EPH receptor A2                                                           |
| GO protein binding | 459 | 6249 | 0.0278374 | 197259 mixed lineage kinase domain-like                                        |
| GO protein binding | 459 | 6249 | 0.0278374 | 1999 E74-like factor 3 (ets domain transcription factor, epithelial-specific ) |
| GO protein binding | 459 | 6249 | 0.0278374 | 201501 zinc finger and BTB domain containing 7C                                |
| GO protein binding | 459 | 6249 | 0.0278374 | 201895 chromosome 4 open reading frame 34                                      |
| GO protein binding | 459 | 6249 | 0.0278374 | 2033 E1A binding protein p300                                                  |
| GO protein binding | 459 | 6249 | 0.0278374 | 2040 stomatin                                                                  |
| GO protein binding | 459 | 6249 | 0.0278374 | 2044 EPH receptor A5                                                           |
| GO protein binding | 459 | 6249 | 0.0278374 | 2066 v-erb-a erythroblastic leukemia viral oncogene homolog 4 (avian)          |
| GO protein binding | 459 | 6249 | 0.0278374 | 2114 v-ets erythroblastosis virus E26 oncogene homolog 2 (avian)               |
| GO protein binding | 459 | 6249 | 0.0278374 | 2117 ets variant 3                                                             |
| GO protein binding | 459 | 6249 | 0.0278374 | 2122 MDS1 and EVI1 complex locus                                               |
| GO protein binding | 459 | 6249 | 0.0278374 | 2200 fibrillin 1                                                               |
| GO protein binding | 459 | 6249 | 0.0278374 | 220441 ring finger protein 152                                                 |
| GO protein binding | 459 | 6249 | 0.0278374 | 222223 KIAA1324-like                                                           |
| GO protein binding | 459 | 6249 | 0.0278374 | 222546 regulatory factor X, 6                                                  |
| GO protein binding | 459 | 6249 | 0.0278374 | 2263 fibroblast growth factor receptor 2                                       |
| GO protein binding | 459 | 6249 | 0.0278374 | 22795 nidogen 2 (osteonidogen)                                                 |
| GO protein binding | 459 | 6249 | 0.0278374 | 22859 latrophilin 1                                                            |
| GO protein binding | 459 | 6249 | 0.0278374 | 2290 forkhead box G1                                                           |
| GO protein binding | 459 | 6249 | 0.0278374 | 22906 trafficking protein, kinesin binding 1                                   |
| GO protein binding | 459 | 6249 | 0.0278374 | 2296 forkhead box C1                                                           |
| GO protein binding | 459 | 6249 | 0.0278374 | 23035 PH domain and leucine rich repeat protein phosphatase 2                  |
| GO protein binding | 459 | 6249 | 0.0278374 | 23043 TRAF2 and NCK interacting kinase                                         |
| GO protein binding | 459 | 6249 | 0.0278374 | 23048 formin binding protein 1                                                 |
| GO protein binding | 459 | 6249 | 0.0278374 | 23081 lysine (K)-specific demethylase 4C                                       |
| GO protein binding | 459 | 6249 | 0.0278374 | 23092 Rho GTPase activating protein 26                                         |
| GO protein binding | 459 | 6249 | 0.0278374 | 23095 kinesin family member 1B                                                 |
| GO protein binding | 459 | 6249 | 0.0278374 | 23099 zinc finger and BTB domain containing 43                                 |
| GO protein binding | 459 | 6249 | 0.0278374 | 23179 ral guanine nucleotide dissociation stimulator-like 1                    |

|                    |     |      |           |                                                                     |
|--------------------|-----|------|-----------|---------------------------------------------------------------------|
| GO protein binding | 459 | 6249 | 0.0278374 | 23199 KIAA0182                                                      |
| GO protein binding | 459 | 6249 | 0.0278374 | 23208 synaptotagmin XI                                              |
| GO protein binding | 459 | 6249 | 0.0278374 | 23248 regulation of nuclear pre-mRNA domain containing 2            |
| GO protein binding | 459 | 6249 | 0.0278374 | 23303 kinesin family member 13B                                     |
| GO protein binding | 459 | 6249 | 0.0278374 | 2331 fibromodulin                                                   |
| GO protein binding | 459 | 6249 | 0.0278374 | 23338 PHD finger protein 15                                         |
| GO protein binding | 459 | 6249 | 0.0278374 | 23365 Rho guanine nucleotide exchange factor (GEF) 12               |
| GO protein binding | 459 | 6249 | 0.0278374 | 23368 protein phosphatase 1, regulatory (inhibitor) subunit 13B     |
| GO protein binding | 459 | 6249 | 0.0278374 | 23371 tensin like C1 domain containing phosphatase (tensin 2)       |
| GO protein binding | 459 | 6249 | 0.0278374 | 23373 CREB regulated transcription coactivator 1                    |
| GO protein binding | 459 | 6249 | 0.0278374 | 23387 SIK family kinase 3                                           |
| GO protein binding | 459 | 6249 | 0.0278374 | 23476 bromodomain containing 4                                      |
| GO protein binding | 459 | 6249 | 0.0278374 | 23492 chromobox homolog 7                                           |
| GO protein binding | 459 | 6249 | 0.0278374 | 2353 FBJ murine osteosarcoma viral oncogene homolog                 |
| GO protein binding | 459 | 6249 | 0.0278374 | 23650 tripartite motif-containing 29                                |
| GO protein binding | 459 | 6249 | 0.0278374 | 23654 plexin B2                                                     |
| GO protein binding | 459 | 6249 | 0.0278374 | 23774 bromodomain containing 1                                      |
| GO protein binding | 459 | 6249 | 0.0278374 | 240 arachidonate 5-lipoxygenase                                     |
| GO protein binding | 459 | 6249 | 0.0278374 | 2521 fused in sarcoma                                               |
| GO protein binding | 459 | 6249 | 0.0278374 | 255488 ring finger protein 144B                                     |
| GO protein binding | 459 | 6249 | 0.0278374 | 2571 glutamate decarboxylase 1 (brain, 67kDa)                       |
| GO protein binding | 459 | 6249 | 0.0278374 | 25837 RAB26, member RAS oncogene family                             |
| GO protein binding | 459 | 6249 | 0.0278374 | 25946 zinc finger protein 385A                                      |
| GO protein binding | 459 | 6249 | 0.0278374 | 26050 SLIT and NTRK-like family, member 5                           |
| GO protein binding | 459 | 6249 | 0.0278374 | 26119 low density lipoprotein receptor adaptor protein 1            |
| GO protein binding | 459 | 6249 | 0.0278374 | 2615 leucine rich repeat containing 32                              |
| GO protein binding | 459 | 6249 | 0.0278374 | 26191 protein tyrosine phosphatase, non-receptor type 22 (lymphoid) |
| GO protein binding | 459 | 6249 | 0.0278374 | 26232 F-box protein 2                                               |
| GO protein binding | 459 | 6249 | 0.0278374 | 2624 GATA binding protein 2                                         |
| GO protein binding | 459 | 6249 | 0.0278374 | 26270 F-box protein 6                                               |
| GO protein binding | 459 | 6249 | 0.0278374 | 26468 LIM homeobox 6                                                |
| GO protein binding | 459 | 6249 | 0.0278374 | 27035 NADPH oxidase 1                                               |
| GO protein binding | 459 | 6249 | 0.0278374 | 2706 gap junction protein, beta 2, 26kDa                            |
| GO protein binding | 459 | 6249 | 0.0278374 | 2707 gap junction protein, beta 3, 31kDa                            |
| GO protein binding | 459 | 6249 | 0.0278374 | 27134 tight junction protein 3 (zona occludens 3)                   |
| GO protein binding | 459 | 6249 | 0.0278374 | 27165 glutaminase 2 (liver, mitochondrial)                          |



|                    |     |      |           |                                                                             |
|--------------------|-----|------|-----------|-----------------------------------------------------------------------------|
| GO protein binding | 459 | 6249 | 0.0278374 | 27242 tumor necrosis factor receptor superfamily, member 21                 |
| GO protein binding | 459 | 6249 | 0.0278374 | 27246 ring finger protein 115                                               |
| GO protein binding | 459 | 6249 | 0.0278374 | 27345 potassium large conductance calcium-activated channel, subfamily M,   |
| GO protein binding | 459 | 6249 | 0.0278374 | 2737 GLI family zinc finger 3                                               |
| GO protein binding | 459 | 6249 | 0.0278374 | 2801 golgin A2                                                              |
| GO protein binding | 459 | 6249 | 0.0278374 | 286133 scavenger receptor class A, member 5 (putative)                      |
| GO protein binding | 459 | 6249 | 0.0278374 | 28996 homeodomain interacting protein kinase 2                              |
| GO protein binding | 459 | 6249 | 0.0278374 | 29108 PYD and CARD domain containing                                        |
| GO protein binding | 459 | 6249 | 0.0278374 | 2911 glutamate receptor, metabotropic 1                                     |
| GO protein binding | 459 | 6249 | 0.0278374 | 29116 myosin regulatory light chain interacting protein                     |
| GO protein binding | 459 | 6249 | 0.0278374 | 29126 CD274 molecule                                                        |
| GO protein binding | 459 | 6249 | 0.0278374 | 2947 glutathione S-transferase mu 3 (brain)                                 |
| GO protein binding | 459 | 6249 | 0.0278374 | 29760 B-cell linker                                                         |
| GO protein binding | 459 | 6249 | 0.0278374 | 30008 EGF-containing fibulin-like extracellular matrix protein 2            |
| GO protein binding | 459 | 6249 | 0.0278374 | 311 annexin A11                                                             |
| GO protein binding | 459 | 6249 | 0.0278374 | 3164 nuclear receptor subfamily 4, group A, member 1                        |
| GO protein binding | 459 | 6249 | 0.0278374 | 3192 heterogeneous nuclear ribonucleoprotein U (scaffold attachment facto   |
| GO protein binding | 459 | 6249 | 0.0278374 | 3400 inhibitor of DNA binding 4, dominant negative helix-loop-helix protein |
| GO protein binding | 459 | 6249 | 0.0278374 | 3428 interferon, gamma-inducible protein 16                                 |
| GO protein binding | 459 | 6249 | 0.0278374 | 3479 insulin-like growth factor 1 (somatomedin C)                           |
| GO protein binding | 459 | 6249 | 0.0278374 | 3486 insulin-like growth factor binding protein 3                           |
| GO protein binding | 459 | 6249 | 0.0278374 | 3488 insulin-like growth factor binding protein 5                           |
| GO protein binding | 459 | 6249 | 0.0278374 | 3561 interleukin 2 receptor, gamma (severe combined immunodeficiency)       |
| GO protein binding | 459 | 6249 | 0.0278374 | 3570 interleukin 6 receptor                                                 |
| GO protein binding | 459 | 6249 | 0.0278374 | 358 aquaporin 1 (Colton blood group)                                        |
| GO protein binding | 459 | 6249 | 0.0278374 | 3587 interleukin 10 receptor, alpha                                         |
| GO protein binding | 459 | 6249 | 0.0278374 | 3601 interleukin 15 receptor, alpha                                         |
| GO protein binding | 459 | 6249 | 0.0278374 | 3604 tumor necrosis factor receptor superfamily, member 9                   |
| GO protein binding | 459 | 6249 | 0.0278374 | 3643 insulin receptor                                                       |
| GO protein binding | 459 | 6249 | 0.0278374 | 3678 integrin, alpha 5 (fibronectin receptor, alpha polypeptide)            |
| GO protein binding | 459 | 6249 | 0.0278374 | 3687 integrin, alpha X (complement component 3 receptor 4 subunit)          |
| GO protein binding | 459 | 6249 | 0.0278374 | 3689 integrin, beta 2 (complement component 3 receptor 3 and 4 subunit)     |
| GO protein binding | 459 | 6249 | 0.0278374 | 3691 integrin, beta 4                                                       |
| GO protein binding | 459 | 6249 | 0.0278374 | 3696 integrin, beta 8                                                       |
| GO protein binding | 459 | 6249 | 0.0278374 | 3725 jun oncogene                                                           |
| GO protein binding | 459 | 6249 | 0.0278374 | 3732 CD82 molecule                                                          |

|                    |     |      |           |                                                                            |
|--------------------|-----|------|-----------|----------------------------------------------------------------------------|
| GO protein binding | 459 | 6249 | 0.0278374 | 375056 melanoma inhibitory activity family, member 3                       |
| GO protein binding | 459 | 6249 | 0.0278374 | 375449 microtubule associated serine/threonine kinase family member 4      |
| GO protein binding | 459 | 6249 | 0.0278374 | 375790 agrin                                                               |
| GO protein binding | 459 | 6249 | 0.0278374 | 3759 potassium inwardly-rectifying channel, subfamily J, member 2          |
| GO protein binding | 459 | 6249 | 0.0278374 | 378925 ring finger protein 148                                             |
| GO protein binding | 459 | 6249 | 0.0278374 | 3790 potassium voltage-gated channel, delayed-rectifier, subfamily S, memb |
| GO protein binding | 459 | 6249 | 0.0278374 | 3814 KiSS-1 metastasis-suppressor                                          |
| GO protein binding | 459 | 6249 | 0.0278374 | 3815 v-kit Hardy-Zuckerman 4 feline sarcoma viral oncogene homolog         |
| GO protein binding | 459 | 6249 | 0.0278374 | 3845 v-Ki-ras2 Kirsten rat sarcoma viral oncogene homolog                  |
| GO protein binding | 459 | 6249 | 0.0278374 | 387496 RAS-like, family 11, member A                                       |
| GO protein binding | 459 | 6249 | 0.0278374 | 388591 ring finger protein 207                                             |
| GO protein binding | 459 | 6249 | 0.0278374 | 389337 Rho guanine nucleotide exchange factor (GEF) 37                     |
| GO protein binding | 459 | 6249 | 0.0278374 | 3914 laminin, beta 3                                                       |
| GO protein binding | 459 | 6249 | 0.0278374 | 3949 low density lipoprotein receptor                                      |
| GO protein binding | 459 | 6249 | 0.0278374 | 3958 lectin, galactoside-binding, soluble, 3                               |
| GO protein binding | 459 | 6249 | 0.0278374 | 3959 lectin, galactoside-binding, soluble, 3 binding protein               |
| GO protein binding | 459 | 6249 | 0.0278374 | 3983 actin binding LIM protein 1                                           |
| GO protein binding | 459 | 6249 | 0.0278374 | 4005 LIM domain only 2 (rhombotin-like 1)                                  |
| GO protein binding | 459 | 6249 | 0.0278374 | 4007 prickle homolog 3 (Drosophila)                                        |
| GO protein binding | 459 | 6249 | 0.0278374 | 4008 LIM domain 7                                                          |
| GO protein binding | 459 | 6249 | 0.0278374 | 4015 lysyl oxidase                                                         |
| GO protein binding | 459 | 6249 | 0.0278374 | 4056 leukotriene C4 synthase                                               |
| GO protein binding | 459 | 6249 | 0.0278374 | 4087 SMAD family member 2                                                  |
| GO protein binding | 459 | 6249 | 0.0278374 | 4128 monoamine oxidase A                                                   |
| GO protein binding | 459 | 6249 | 0.0278374 | 415116 pim-3 oncogene                                                      |
| GO protein binding | 459 | 6249 | 0.0278374 | 4163 mutated in colorectal cancers                                         |
| GO protein binding | 459 | 6249 | 0.0278374 | 4170 myeloid cell leukemia sequence 1 (BCL2-related)                       |
| GO protein binding | 459 | 6249 | 0.0278374 | 4194 Mdm4 p53 binding protein homolog (mouse)                              |
| GO protein binding | 459 | 6249 | 0.0278374 | 4204 methyl CpG binding protein 2 (Rett syndrome)                          |
| GO protein binding | 459 | 6249 | 0.0278374 | 4209 myocyte enhancer factor 2D                                            |
| GO protein binding | 459 | 6249 | 0.0278374 | 4223 mesenchyme homeobox 2                                                 |
| GO protein binding | 459 | 6249 | 0.0278374 | 4254 KIT ligand                                                            |
| GO protein binding | 459 | 6249 | 0.0278374 | 429 achaete-scute complex homolog 1 (Drosophila)                           |
| GO protein binding | 459 | 6249 | 0.0278374 | 4306 nuclear receptor subfamily 3, group C, member 2                       |
| GO protein binding | 459 | 6249 | 0.0278374 | 4359 myelin protein zero                                                   |
| GO protein binding | 459 | 6249 | 0.0278374 | 4486 macrophage stimulating 1 receptor (c-met-related tyrosine kinase)     |

|                    |     |      |           |                                                                                      |
|--------------------|-----|------|-----------|--------------------------------------------------------------------------------------|
| GO protein binding | 459 | 6249 | 0.0278374 | 4524 5,10-methylenetetrahydrofolate reductase (NADPH)                                |
| GO protein binding | 459 | 6249 | 0.0278374 | 4599 myxovirus (influenza virus) resistance 1, interferon-inducible protein p1       |
| GO protein binding | 459 | 6249 | 0.0278374 | 4613 v-myc myelocytomatosis viral related oncogene, neuroblastoma derive             |
| GO protein binding | 459 | 6249 | 0.0278374 | 4616 growth arrest and DNA-damage-inducible, beta                                    |
| GO protein binding | 459 | 6249 | 0.0278374 | 4638 myosin light chain kinase                                                       |
| GO protein binding | 459 | 6249 | 0.0278374 | 467 activating transcription factor 3                                                |
| GO protein binding | 459 | 6249 | 0.0278374 | 4692 necdin homolog (mouse)                                                          |
| GO protein binding | 459 | 6249 | 0.0278374 | 4791 nuclear factor of kappa light polypeptide gene enhancer in B-cells 2 (p4        |
| GO protein binding | 459 | 6249 | 0.0278374 | 4792 nuclear factor of kappa light polypeptide gene enhancer in B-cells inhib        |
| GO protein binding | 459 | 6249 | 0.0278374 | 4794 nuclear factor of kappa light polypeptide gene enhancer in B-cells inhib        |
| GO protein binding | 459 | 6249 | 0.0278374 | 4795 nuclear factor of kappa light polypeptide gene enhancer in B-cells inhib        |
| GO protein binding | 459 | 6249 | 0.0278374 | 48 aconitase 1, soluble                                                              |
| GO protein binding | 459 | 6249 | 0.0278374 | 4802 nuclear transcription factor Y, gamma                                           |
| GO protein binding | 459 | 6249 | 0.0278374 | 4842 nitric oxide synthase 1 (neuronal)                                              |
| GO protein binding | 459 | 6249 | 0.0278374 | 4849 CCR4-NOT transcription complex, subunit 3                                       |
| GO protein binding | 459 | 6249 | 0.0278374 | 4851 Notch homolog 1, translocation-associated (Drosophila)                          |
| GO protein binding | 459 | 6249 | 0.0278374 | 4853 Notch homolog 2 (Drosophila)                                                    |
| GO protein binding | 459 | 6249 | 0.0278374 | 4886 neuropeptide Y receptor Y1                                                      |
| GO protein binding | 459 | 6249 | 0.0278374 | 4915 neurotrophic tyrosine kinase, receptor, type 2                                  |
| GO protein binding | 459 | 6249 | 0.0278374 | 4929 nuclear receptor subfamily 4, group A, member 2                                 |
| GO protein binding | 459 | 6249 | 0.0278374 | 493 ATPase, Ca <sup>++</sup> transporting, plasma membrane 4                         |
| GO protein binding | 459 | 6249 | 0.0278374 | 498 ATP synthase, H <sup>+</sup> transporting, mitochondrial F1 complex, alpha subun |
| GO protein binding | 459 | 6249 | 0.0278374 | 50617 ATPase, H <sup>+</sup> transporting, lysosomal V0 subunit a4                   |
| GO protein binding | 459 | 6249 | 0.0278374 | 5066 peptidylglycine alpha-amidating monooxygenase                                   |
| GO protein binding | 459 | 6249 | 0.0278374 | 5071 Parkinson disease (autosomal recessive, juvenile) 2, parkin                     |
| GO protein binding | 459 | 6249 | 0.0278374 | 5083 paired box 9                                                                    |
| GO protein binding | 459 | 6249 | 0.0278374 | 50937 Cdon homolog (mouse)                                                           |
| GO protein binding | 459 | 6249 | 0.0278374 | 51168 myosin XVA                                                                     |
| GO protein binding | 459 | 6249 | 0.0278374 | 5129 cyclin-dependent kinase 18                                                      |
| GO protein binding | 459 | 6249 | 0.0278374 | 5152 phosphodiesterase 9A                                                            |
| GO protein binding | 459 | 6249 | 0.0278374 | 51621 Kruppel-like factor 13                                                         |
| GO protein binding | 459 | 6249 | 0.0278374 | 51655 RAS, dexamethasone-induced 1                                                   |
| GO protein binding | 459 | 6249 | 0.0278374 | 51710 zinc finger protein 44                                                         |
| GO protein binding | 459 | 6249 | 0.0278374 | 51754 transmembrane protein 8B                                                       |
| GO protein binding | 459 | 6249 | 0.0278374 | 5187 period homolog 1 (Drosophila)                                                   |
| GO protein binding | 459 | 6249 | 0.0278374 | 5218 cyclin-dependent kinase 14                                                      |

|                    |     |      |           |                                                                             |
|--------------------|-----|------|-----------|-----------------------------------------------------------------------------|
| GO protein binding | 459 | 6249 | 0.0278374 | 5239 phosphoglucomutase 5                                                   |
| GO protein binding | 459 | 6249 | 0.0278374 | 5243 ATP-binding cassette, sub-family B (MDR/TAP), member 1                 |
| GO protein binding | 459 | 6249 | 0.0278374 | 5244 ATP-binding cassette, sub-family B (MDR/TAP), member 4                 |
| GO protein binding | 459 | 6249 | 0.0278374 | 5284 polymeric immunoglobulin receptor                                      |
| GO protein binding | 459 | 6249 | 0.0278374 | 5295 phosphoinositide-3-kinase, regulatory subunit 1 (alpha)                |
| GO protein binding | 459 | 6249 | 0.0278374 | 5304 prolactin-induced protein                                              |
| GO protein binding | 459 | 6249 | 0.0278374 | 5308 paired-like homeodomain 2                                              |
| GO protein binding | 459 | 6249 | 0.0278374 | 5325 pleiomorphic adenoma gene-like 1                                       |
| GO protein binding | 459 | 6249 | 0.0278374 | 5327 plasminogen activator, tissue                                          |
| GO protein binding | 459 | 6249 | 0.0278374 | 53405 chloride intracellular channel 5                                      |
| GO protein binding | 459 | 6249 | 0.0278374 | 5346 perilipin 1                                                            |
| GO protein binding | 459 | 6249 | 0.0278374 | 5371 promyelocytic leukemia                                                 |
| GO protein binding | 459 | 6249 | 0.0278374 | 54361 wingless-type MMTV integration site family, member 4                  |
| GO protein binding | 459 | 6249 | 0.0278374 | 54504 carboxypeptidase, vitellogenic-like                                   |
| GO protein binding | 459 | 6249 | 0.0278374 | 5460 POU class 5 homeobox 1                                                 |
| GO protein binding | 459 | 6249 | 0.0278374 | 5465 peroxisome proliferator-activated receptor alpha                       |
| GO protein binding | 459 | 6249 | 0.0278374 | 54877 zinc finger, CCHC domain containing 2                                 |
| GO protein binding | 459 | 6249 | 0.0278374 | 54894 ring finger protein 43                                                |
| GO protein binding | 459 | 6249 | 0.0278374 | 54904 Wolf-Hirschhorn syndrome candidate 1-like 1                           |
| GO protein binding | 459 | 6249 | 0.0278374 | 54932 exonuclease 3'-5' domain containing 3                                 |
| GO protein binding | 459 | 6249 | 0.0278374 | 55124 piwi-like 2 (Drosophila)                                              |
| GO protein binding | 459 | 6249 | 0.0278374 | 55140 elongation protein 3 homolog ( <i>S. cerevisiae</i> )                 |
| GO protein binding | 459 | 6249 | 0.0278374 | 55249 YY1 associated protein 1                                              |
| GO protein binding | 459 | 6249 | 0.0278374 | 55432 YOD1 OTU deubiquinating enzyme 1 homolog ( <i>S. cerevisiae</i> )     |
| GO protein binding | 459 | 6249 | 0.0278374 | 55705 importin 9                                                            |
| GO protein binding | 459 | 6249 | 0.0278374 | 55824 phosphoprotein associated with glycosphingolipid microdomains 1       |
| GO protein binding | 459 | 6249 | 0.0278374 | 55867 solute carrier family 22 (organic anion/urate transporter), member 11 |
| GO protein binding | 459 | 6249 | 0.0278374 | 55870 ash1 (absent, small, or homeotic)-like ( <i>Drosophila</i> )          |
| GO protein binding | 459 | 6249 | 0.0278374 | 55909 bridging integrator 3                                                 |
| GO protein binding | 459 | 6249 | 0.0278374 | 5608 mitogen-activated protein kinase kinase 6                              |
| GO protein binding | 459 | 6249 | 0.0278374 | 56256 SERTA domain containing 4                                             |
| GO protein binding | 459 | 6249 | 0.0278374 | 56288 par-3 partitioning defective 3 homolog ( <i>C. elegans</i> )          |
| GO protein binding | 459 | 6249 | 0.0278374 | 5648 mannan-binding lectin serine peptidase 1 (C4/C2 activating component)  |
| GO protein binding | 459 | 6249 | 0.0278374 | 5696 proteasome (prosome, macropain) subunit, beta type, 8 (large multifur) |
| GO protein binding | 459 | 6249 | 0.0278374 | 57132 chromatin modifying protein 1B                                        |
| GO protein binding | 459 | 6249 | 0.0278374 | 57139 ral guanine nucleotide dissociation stimulator-like 3                 |

|                    |     |      |           |                                                                                  |
|--------------------|-----|------|-----------|----------------------------------------------------------------------------------|
| GO protein binding | 459 | 6249 | 0.0278374 | 57147 SCY1-like 3 ( <i>S. cerevisiae</i> )                                       |
| GO protein binding | 459 | 6249 | 0.0278374 | 57161 pellino homolog 2 ( <i>Drosophila</i> )                                    |
| GO protein binding | 459 | 6249 | 0.0278374 | 573 BCL2-associated athanogene                                                   |
| GO protein binding | 459 | 6249 | 0.0278374 | 57379 activation-induced cytidine deaminase                                      |
| GO protein binding | 459 | 6249 | 0.0278374 | 57459 GATA zinc finger domain containing 2B                                      |
| GO protein binding | 459 | 6249 | 0.0278374 | 57535 KIAA1324                                                                   |
| GO protein binding | 459 | 6249 | 0.0278374 | 57619 shroom family member 3                                                     |
| GO protein binding | 459 | 6249 | 0.0278374 | 57620 stromal interaction molecule 2                                             |
| GO protein binding | 459 | 6249 | 0.0278374 | 57636 Rho GTPase activating protein 23                                           |
| GO protein binding | 459 | 6249 | 0.0278374 | 5774 protein tyrosine phosphatase, non-receptor type 3                           |
| GO protein binding | 459 | 6249 | 0.0278374 | 5787 protein tyrosine phosphatase, receptor type, B                              |
| GO protein binding | 459 | 6249 | 0.0278374 | 5789 protein tyrosine phosphatase, receptor type, D                              |
| GO protein binding | 459 | 6249 | 0.0278374 | 5791 protein tyrosine phosphatase, receptor type, E                              |
| GO protein binding | 459 | 6249 | 0.0278374 | 5794 protein tyrosine phosphatase, receptor type, H                              |
| GO protein binding | 459 | 6249 | 0.0278374 | 5799 protein tyrosine phosphatase, receptor type, N polypeptide 2                |
| GO protein binding | 459 | 6249 | 0.0278374 | 5801 protein tyrosine phosphatase, receptor type, R                              |
| GO protein binding | 459 | 6249 | 0.0278374 | 5873 RAB27A, member RAS oncogene family                                          |
| GO protein binding | 459 | 6249 | 0.0278374 | 5950 retinol binding protein 4, plasma                                           |
| GO protein binding | 459 | 6249 | 0.0278374 | 604 B-cell CLL/lymphoma 6                                                        |
| GO protein binding | 459 | 6249 | 0.0278374 | 60485 salvador homolog 1 ( <i>Drosophila</i> )                                   |
| GO protein binding | 459 | 6249 | 0.0278374 | 6096 RAR-related orphan receptor B                                               |
| GO protein binding | 459 | 6249 | 0.0278374 | 6256 retinoid X receptor, alpha                                                  |
| GO protein binding | 459 | 6249 | 0.0278374 | 627 brain-derived neurotrophic factor                                            |
| GO protein binding | 459 | 6249 | 0.0278374 | 6402 selectin L                                                                  |
| GO protein binding | 459 | 6249 | 0.0278374 | 64083 golgi phosphoprotein 3 (coat-protein)                                      |
| GO protein binding | 459 | 6249 | 0.0278374 | 64108 receptor (chemosensory) transporter protein 4                              |
| GO protein binding | 459 | 6249 | 0.0278374 | 64127 nucleotide-binding oligomerization domain containing 2                     |
| GO protein binding | 459 | 6249 | 0.0278374 | 64135 interferon induced with helicase C domain 1                                |
| GO protein binding | 459 | 6249 | 0.0278374 | 6446 serum/glucocorticoid regulated kinase 1                                     |
| GO protein binding | 459 | 6249 | 0.0278374 | 6452 SH3-domain binding protein 2                                                |
| GO protein binding | 459 | 6249 | 0.0278374 | 64798 DEP domain containing 6                                                    |
| GO protein binding | 459 | 6249 | 0.0278374 | 6505 solute carrier family 1 (neuronal/epithelial high affinity glutamate transp |
| GO protein binding | 459 | 6249 | 0.0278374 | 652 bone morphogenetic protein 4                                                 |
| GO protein binding | 459 | 6249 | 0.0278374 | 6521 solute carrier family 4, anion exchanger, member 1 (erythrocyte memb        |
| GO protein binding | 459 | 6249 | 0.0278374 | 6565 solute carrier family 15 (H <sup>+</sup> /peptide transporter), member 2    |
| GO protein binding | 459 | 6249 | 0.0278374 | 65999 leucine rich repeat containing 61                                          |

|                    |     |      |           |                                                                                  |
|--------------------|-----|------|-----------|----------------------------------------------------------------------------------|
| GO protein binding | 459 | 6249 | 0.0278374 | 6604 SWI/SNF related, matrix associated, actin dependent regulator of chromatin  |
| GO protein binding | 459 | 6249 | 0.0278374 | 6622 synuclein, alpha (non A4 component of amyloid precursor)                    |
| GO protein binding | 459 | 6249 | 0.0278374 | 6690 serine peptidase inhibitor, Kazal type 1                                    |
| GO protein binding | 459 | 6249 | 0.0278374 | 6692 serine peptidase inhibitor, Kunitz type 1                                   |
| GO protein binding | 459 | 6249 | 0.0278374 | 6710 spectrin, beta, erythrocytic                                                |
| GO protein binding | 459 | 6249 | 0.0278374 | 6778 signal transducer and activator of transcription 6, interleukin-4 inducible |
| GO protein binding | 459 | 6249 | 0.0278374 | 682 basigin (Ok blood group)                                                     |
| GO protein binding | 459 | 6249 | 0.0278374 | 6850 spleen tyrosine kinase                                                      |
| GO protein binding | 459 | 6249 | 0.0278374 | 6857 synaptotagmin I                                                             |
| GO protein binding | 459 | 6249 | 0.0278374 | 6921 transcription elongation factor B (SIII), polypeptide 1 (15kDa, elongin C)  |
| GO protein binding | 459 | 6249 | 0.0278374 | 6941 transcription factor 19                                                     |
| GO protein binding | 459 | 6249 | 0.0278374 | 7001 peroxiredoxin 2                                                             |
| GO protein binding | 459 | 6249 | 0.0278374 | 7022 transcription factor AP-2 gamma (activating enhancer binding protein 2)     |
| GO protein binding | 459 | 6249 | 0.0278374 | 7026 nuclear receptor subfamily 2, group F, member 2                             |
| GO protein binding | 459 | 6249 | 0.0278374 | 7049 transforming growth factor, beta receptor III                               |
| GO protein binding | 459 | 6249 | 0.0278374 | 7069 thyroid hormone responsive (SPOT14 homolog, rat)                            |
| GO protein binding | 459 | 6249 | 0.0278374 | 7071 Kruppel-like factor 10                                                      |
| GO protein binding | 459 | 6249 | 0.0278374 | 7076 TIMP metalloproteinase inhibitor 1                                          |
| GO protein binding | 459 | 6249 | 0.0278374 | 7089 transducin-like enhancer of split 2 (E(sp1) homolog, Drosophila)            |
| GO protein binding | 459 | 6249 | 0.0278374 | 7090 transducin-like enhancer of split 3 (E(sp1) homolog, Drosophila)            |
| GO protein binding | 459 | 6249 | 0.0278374 | 7097 toll-like receptor 2                                                        |
| GO protein binding | 459 | 6249 | 0.0278374 | 7098 toll-like receptor 3                                                        |
| GO protein binding | 459 | 6249 | 0.0278374 | 7099 toll-like receptor 4                                                        |
| GO protein binding | 459 | 6249 | 0.0278374 | 7100 toll-like receptor 5                                                        |
| GO protein binding | 459 | 6249 | 0.0278374 | 7106 tetraspanin 4                                                               |
| GO protein binding | 459 | 6249 | 0.0278374 | 7133 tumor necrosis factor receptor superfamily, member 1B                       |
| GO protein binding | 459 | 6249 | 0.0278374 | 7170 tropomyosin 3                                                               |
| GO protein binding | 459 | 6249 | 0.0278374 | 718 complement component 3                                                       |
| GO protein binding | 459 | 6249 | 0.0278374 | 722 complement component 4 binding protein, alpha                                |
| GO protein binding | 459 | 6249 | 0.0278374 | 7223 transient receptor potential cation channel, subfamily C, member 4          |
| GO protein binding | 459 | 6249 | 0.0278374 | 7227 trichorhinophalangeal syndrome I                                            |
| GO protein binding | 459 | 6249 | 0.0278374 | 7474 wingless-type MMTV integration site family, member 5A                       |
| GO protein binding | 459 | 6249 | 0.0278374 | 7538 zinc finger protein 36, C3H type, homolog (mouse)                           |
| GO protein binding | 459 | 6249 | 0.0278374 | 7546 Zic family member 2 (odd-paired homolog, Drosophila)                        |
| GO protein binding | 459 | 6249 | 0.0278374 | 7597 zinc finger and BTB domain containing 25                                    |
| GO protein binding | 459 | 6249 | 0.0278374 | 760 carbonic anhydrase II                                                        |

|                    |     |      |           |                                                                              |
|--------------------|-----|------|-----------|------------------------------------------------------------------------------|
| GO protein binding | 459 | 6249 | 0.0278374 | 7706 tripartite motif-containing 25                                          |
| GO protein binding | 459 | 6249 | 0.0278374 | 783 calcium channel, voltage-dependent, beta 2 subunit                       |
| GO protein binding | 459 | 6249 | 0.0278374 | 7852 chemokine (C-X-C motif) receptor 4                                      |
| GO protein binding | 459 | 6249 | 0.0278374 | 79092 caspase recruitment domain family, member 14                           |
| GO protein binding | 459 | 6249 | 0.0278374 | 79132 DEXH (Asp-Glu-X-His) box polypeptide 58                                |
| GO protein binding | 459 | 6249 | 0.0278374 | 79180 EF-hand domain family, member D2                                       |
| GO protein binding | 459 | 6249 | 0.0278374 | 79444 baculoviral IAP repeat-containing 7                                    |
| GO protein binding | 459 | 6249 | 0.0278374 | 79782 leucine rich repeat containing 31                                      |
| GO protein binding | 459 | 6249 | 0.0278374 | 79820 cation channel, sperm-associated, beta                                 |
| GO protein binding | 459 | 6249 | 0.0278374 | 7984 Rho guanine nucleotide exchange factor (GEF) 5                          |
| GO protein binding | 459 | 6249 | 0.0278374 | 79872 Cas-Br-M (murine) ecotropic retroviral transforming sequence-like 1    |
| GO protein binding | 459 | 6249 | 0.0278374 | 799 calcitonin receptor                                                      |
| GO protein binding | 459 | 6249 | 0.0278374 | 80125 coiled-coil domain containing 33                                       |
| GO protein binding | 459 | 6249 | 0.0278374 | 80169 chromosome 17 open reading frame 68                                    |
| GO protein binding | 459 | 6249 | 0.0278374 | 80223 RAB11 family interacting protein 1 (class I)                           |
| GO protein binding | 459 | 6249 | 0.0278374 | 80311 kelch-like 15 (Drosophila)                                             |
| GO protein binding | 459 | 6249 | 0.0278374 | 81603 tripartite motif-containing 8                                          |
| GO protein binding | 459 | 6249 | 0.0278374 | 81844 tripartite motif-containing 56                                         |
| GO protein binding | 459 | 6249 | 0.0278374 | 819 calcium modulating ligand                                                |
| GO protein binding | 459 | 6249 | 0.0278374 | 831 calpastatin                                                              |
| GO protein binding | 459 | 6249 | 0.0278374 | 834 caspase 1, apoptosis-related cysteine peptidase (interleukin 1, beta, co |
| GO protein binding | 459 | 6249 | 0.0278374 | 83593 Ras association (RalGDS/AF-6) domain family member 5                   |
| GO protein binding | 459 | 6249 | 0.0278374 | 83666 poly (ADP-ribose) polymerase family, member 9                          |
| GO protein binding | 459 | 6249 | 0.0278374 | 837 caspase 4, apoptosis-related cysteine peptidase                          |
| GO protein binding | 459 | 6249 | 0.0278374 | 8382 non-metastatic cells 5, protein expressed in (nucleoside-diphosphate k  |
| GO protein binding | 459 | 6249 | 0.0278374 | 83937 Ras association (RalGDS/AF-6) domain family member 4                   |
| GO protein binding | 459 | 6249 | 0.0278374 | 84033 obscurin, cytoskeletal calmodulin and titin-interacting RhoGEF         |
| GO protein binding | 459 | 6249 | 0.0278374 | 84171 lysyl oxidase-like 4                                                   |
| GO protein binding | 459 | 6249 | 0.0278374 | 84674 caspase recruitment domain family, member 6                            |
| GO protein binding | 459 | 6249 | 0.0278374 | 84941 hematopoietic SH2 domain containing                                    |
| GO protein binding | 459 | 6249 | 0.0278374 | 8519 interferon induced transmembrane protein 1 (9-27)                       |
| GO protein binding | 459 | 6249 | 0.0278374 | 8531 cold shock domain protein A                                             |
| GO protein binding | 459 | 6249 | 0.0278374 | 8542 apolipoprotein L, 1                                                     |
| GO protein binding | 459 | 6249 | 0.0278374 | 8553 basic helix-loop-helix family, member e40                               |
| GO protein binding | 459 | 6249 | 0.0278374 | 8556 CDC14 cell division cycle 14 homolog A (S. cerevisiae)                  |
| GO protein binding | 459 | 6249 | 0.0278374 | 8600 tumor necrosis factor (ligand) superfamily, member 11                   |

|                    |     |      |           |                                                                                |
|--------------------|-----|------|-----------|--------------------------------------------------------------------------------|
| GO protein binding | 459 | 6249 | 0.0278374 | 862 runt-related transcription factor 1; translocated to, 1 (cyclin D-related) |
| GO protein binding | 459 | 6249 | 0.0278374 | 8631 src kinase associated phosphoprotein 1                                    |
| GO protein binding | 459 | 6249 | 0.0278374 | 8646 chordin                                                                   |
| GO protein binding | 459 | 6249 | 0.0278374 | 8660 insulin receptor substrate 2                                              |
| GO protein binding | 459 | 6249 | 0.0278374 | 8673 vesicle-associated membrane protein 8 (endobrevin)                        |
| GO protein binding | 459 | 6249 | 0.0278374 | 8740 tumor necrosis factor (ligand) superfamily, member 14                     |
| GO protein binding | 459 | 6249 | 0.0278374 | 8751 ADAM metallopeptidase domain 15                                           |
| GO protein binding | 459 | 6249 | 0.0278374 | 8793 tumor necrosis factor receptor superfamily, member 10d, decoy with t      |
| GO protein binding | 459 | 6249 | 0.0278374 | 8796 sciellin                                                                  |
| GO protein binding | 459 | 6249 | 0.0278374 | 8848 TSC22 domain family, member 1                                             |
| GO protein binding | 459 | 6249 | 0.0278374 | 885 cholecystokinin                                                            |
| GO protein binding | 459 | 6249 | 0.0278374 | 8857 Fc fragment of IgG binding protein                                        |
| GO protein binding | 459 | 6249 | 0.0278374 | 8864 period homolog 2 (Drosophila)                                             |
| GO protein binding | 459 | 6249 | 0.0278374 | 8900 cyclin A1                                                                 |
| GO protein binding | 459 | 6249 | 0.0278374 | 8911 calcium channel, voltage-dependent, T type, alpha 1l subunit              |
| GO protein binding | 459 | 6249 | 0.0278374 | 8938 BAI1-associated protein 3                                                 |
| GO protein binding | 459 | 6249 | 0.0278374 | 8973 cholinergic receptor, nicotinic, alpha 6                                  |
| GO protein binding | 459 | 6249 | 0.0278374 | 89870 tripartite motif-containing 15                                           |
| GO protein binding | 459 | 6249 | 0.0278374 | 8996 nucleolar protein 3 (apoptosis repressor with CARD domain)                |
| GO protein binding | 459 | 6249 | 0.0278374 | 9019 myelin protein zero-like 1                                                |
| GO protein binding | 459 | 6249 | 0.0278374 | 9021 suppressor of cytokine signaling 3                                        |
| GO protein binding | 459 | 6249 | 0.0278374 | 9060 3'-phosphoadenosine 5'-phosphosulfate synthase 2                          |
| GO protein binding | 459 | 6249 | 0.0278374 | 9064 mitogen-activated protein kinase kinase kinase 6                          |
| GO protein binding | 459 | 6249 | 0.0278374 | 90865 interleukin 33                                                           |
| GO protein binding | 459 | 6249 | 0.0278374 | 91 activin A receptor, type IB                                                 |
| GO protein binding | 459 | 6249 | 0.0278374 | 91404 SEC14 and spectrin domains 1                                             |
| GO protein binding | 459 | 6249 | 0.0278374 | 91653 Boc homolog (mouse)                                                      |
| GO protein binding | 459 | 6249 | 0.0278374 | 9182 Ras association (RalGDS/AF-6) domain family (N-terminal) member 9         |
| GO protein binding | 459 | 6249 | 0.0278374 | 9185 RALBP1 associated Eps domain containing 2                                 |
| GO protein binding | 459 | 6249 | 0.0278374 | 9271 piwi-like 1 (Drosophila)                                                  |
| GO protein binding | 459 | 6249 | 0.0278374 | 929 CD14 molecule                                                              |
| GO protein binding | 459 | 6249 | 0.0278374 | 9324 high mobility group nucleosomal binding domain 3                          |
| GO protein binding | 459 | 6249 | 0.0278374 | 94 activin A receptor type II-like 1                                           |
| GO protein binding | 459 | 6249 | 0.0278374 | 94025 mucin 16, cell surface associated                                        |
| GO protein binding | 459 | 6249 | 0.0278374 | 9414 tight junction protein 2 (zona occludens 2)                               |
| GO protein binding | 459 | 6249 | 0.0278374 | 9452 integral membrane protein 2A                                              |



|                                     |     |      |           |                                                                       |
|-------------------------------------|-----|------|-----------|-----------------------------------------------------------------------|
| GO protein binding                  | 459 | 6249 | 0.0278374 | 9510 ADAM metallopeptidase with thrombospondin type 1 motif, 1        |
| GO protein binding                  | 459 | 6249 | 0.0278374 | 9595 cytohesin 1 interacting protein                                  |
| GO protein binding                  | 459 | 6249 | 0.0278374 | 961 CD47 molecule                                                     |
| GO protein binding                  | 459 | 6249 | 0.0278374 | 9615 guanine deaminase                                                |
| GO protein binding                  | 459 | 6249 | 0.0278374 | 9722 nitric oxide synthase 1 (neuronal) adaptor protein               |
| GO protein binding                  | 459 | 6249 | 0.0278374 | 9734 histone deacetylase 9                                            |
| GO protein binding                  | 459 | 6249 | 0.0278374 | 9749 phosphatase and actin regulator 2                                |
| GO protein binding                  | 459 | 6249 | 0.0278374 | 9804 translocase of outer mitochondrial membrane 20 homolog (yeast)   |
| GO protein binding                  | 459 | 6249 | 0.0278374 | 9875 URB1 ribosome biogenesis 1 homolog ( <i>S. cerevisiae</i> )      |
| GO protein binding                  | 459 | 6249 | 0.0278374 | 9935 v-maf musculoaponeurotic fibrosarcoma oncogene homolog B (avian) |
| GO protein binding                  | 459 | 6249 | 0.0278374 | 9971 nuclear receptor subfamily 1, group H, member 4                  |
| GO protein binding                  | 459 | 6249 | 0.0278374 | 9985 REC8 homolog (yeast)                                             |
| GO brush border membrane            | 5   | 26   | 0.02922   | 10568 solute carrier family 34 (sodium phosphate), member 2           |
| GO brush border membrane            | 5   | 26   | 0.02922   | 358 aquaporin 1 (Colton blood group)                                  |
| GO brush border membrane            | 5   | 26   | 0.02922   | 3775 potassium channel, subfamily K, member 1                         |
| GO brush border membrane            | 5   | 26   | 0.02922   | 50617 ATPase, H+ transporting, lysosomal V0 subunit a4                |
| GO brush border membrane            | 5   | 26   | 0.02922   | 55600 intelectin 1 (galactofuranose binding)                          |
| GO endopeptidase inhibitor activity | 5   | 26   | 0.02922   | 6590 secretory leukocyte peptidase inhibitor                          |
| GO endopeptidase inhibitor activity | 5   | 26   | 0.02922   | 6690 serine peptidase inhibitor, Kazal type 1                         |
| GO endopeptidase inhibitor activity | 5   | 26   | 0.02922   | 718 complement component 3                                            |
| GO endopeptidase inhibitor activity | 5   | 26   | 0.02922   | 831 calpastatin                                                       |
| GO endopeptidase inhibitor activity | 5   | 26   | 0.02922   | 8434 reversion-inducing-cysteine-rich protein with kazal motifs       |
| GO neuropeptide signaling pathway   | 11  | 85   | 0.0297185 | 1363 carboxypeptidase E                                               |
| GO neuropeptide signaling pathway   | 11  | 85   | 0.0297185 | 2015 egf-like module containing, mucin-like, hormone receptor-like 1  |
| GO neuropeptide signaling pathway   | 11  | 85   | 0.0297185 | 22859 latrophilin 1                                                   |
| GO neuropeptide signaling pathway   | 11  | 85   | 0.0297185 | 23266 latrophilin 2                                                   |
| GO neuropeptide signaling pathway   | 11  | 85   | 0.0297185 | 23284 latrophilin 3                                                   |
| GO neuropeptide signaling pathway   | 11  | 85   | 0.0297185 | 283383 G protein-coupled receptor 133                                 |
| GO neuropeptide signaling pathway   | 11  | 85   | 0.0297185 | 5367 pro-melanin-concentrating hormone                                |
| GO neuropeptide signaling pathway   | 11  | 85   | 0.0297185 | 56923 neuromedin U receptor 2                                         |
| GO neuropeptide signaling pathway   | 11  | 85   | 0.0297185 | 57537 sortilin-related VPS10 domain containing receptor 2             |
| GO neuropeptide signaling pathway   | 11  | 85   | 0.0297185 | 6751 somatostatin receptor 1                                          |
| GO neuropeptide signaling pathway   | 11  | 85   | 0.0297185 | 84059 G protein-coupled receptor 98                                   |
| GO apoptosis                        | 41  | 444  | 0.0306553 | 10081 programmed cell death 7                                         |
| GO apoptosis                        | 41  | 444  | 0.0306553 | 10912 growth arrest and DNA-damage-inducible, gamma                   |
| GO apoptosis                        | 41  | 444  | 0.0306553 | 10913 ectodysplasin A receptor                                        |

|              |    |     |           |                                                                               |
|--------------|----|-----|-----------|-------------------------------------------------------------------------------|
| GO apoptosis | 41 | 444 | 0.0306553 | 1969 EPH receptor A2                                                          |
| GO apoptosis | 41 | 444 | 0.0306553 | 2033 E1A binding protein p300                                                 |
| GO apoptosis | 41 | 444 | 0.0306553 | 2122 MDS1 and EVI1 complex locus                                              |
| GO apoptosis | 41 | 444 | 0.0306553 | 23151 GRAM domain containing 4                                                |
| GO apoptosis | 41 | 444 | 0.0306553 | 23263 MCF.2 cell line derived transforming sequence-like                      |
| GO apoptosis | 41 | 444 | 0.0306553 | 23365 Rho guanine nucleotide exchange factor (GEF) 12                         |
| GO apoptosis | 41 | 444 | 0.0306553 | 23368 protein phosphatase 1, regulatory (inhibitor) subunit 13B               |
| GO apoptosis | 41 | 444 | 0.0306553 | 23604 death-associated protein kinase 2                                       |
| GO apoptosis | 41 | 444 | 0.0306553 | 255488 ring finger protein 144B                                               |
| GO apoptosis | 41 | 444 | 0.0306553 | 28996 homeodomain interacting protein kinase 2                                |
| GO apoptosis | 41 | 444 | 0.0306553 | 3689 integrin, beta 2 (complement component 3 receptor 3 and 4 subunit)       |
| GO apoptosis | 41 | 444 | 0.0306553 | 4170 myeloid cell leukemia sequence 1 (BCL2-related)                          |
| GO apoptosis | 41 | 444 | 0.0306553 | 4194 Mdm4 p53 binding protein homolog (mouse)                                 |
| GO apoptosis | 41 | 444 | 0.0306553 | 4209 myocyte enhancer factor 2D                                               |
| GO apoptosis | 41 | 444 | 0.0306553 | 440603 BCL2-like 15                                                           |
| GO apoptosis | 41 | 444 | 0.0306553 | 4616 growth arrest and DNA-damage-inducible, beta                             |
| GO apoptosis | 41 | 444 | 0.0306553 | 4792 nuclear factor of kappa light polypeptide gene enhancer in B-cells inhib |
| GO apoptosis | 41 | 444 | 0.0306553 | 54739 XIAP associated factor 1                                                |
| GO apoptosis | 41 | 444 | 0.0306553 | 55332 DNA-damage regulated autophagy modulator 1                              |
| GO apoptosis | 41 | 444 | 0.0306553 | 573 BCL2-associated athanogene                                                |
| GO apoptosis | 41 | 444 | 0.0306553 | 5794 protein tyrosine phosphatase, receptor type, H                           |
| GO apoptosis | 41 | 444 | 0.0306553 | 6446 serum/glucocorticoid regulated kinase 1                                  |
| GO apoptosis | 41 | 444 | 0.0306553 | 64651 cysteine-serine-rich nuclear protein 1                                  |
| GO apoptosis | 41 | 444 | 0.0306553 | 7133 tumor necrosis factor receptor superfamily, member 1B                    |
| GO apoptosis | 41 | 444 | 0.0306553 | 7852 chemokine (C-X-C motif) receptor 4                                       |
| GO apoptosis | 41 | 444 | 0.0306553 | 79444 baculoviral IAP repeat-containing 7                                     |
| GO apoptosis | 41 | 444 | 0.0306553 | 834 caspase 1, apoptosis-related cysteine peptidase (interleukin 1, beta, co  |
| GO apoptosis | 41 | 444 | 0.0306553 | 83593 Ras association (RalGDS/AF-6) domain family member 5                    |
| GO apoptosis | 41 | 444 | 0.0306553 | 837 caspase 4, apoptosis-related cysteine peptidase                           |
| GO apoptosis | 41 | 444 | 0.0306553 | 84033 obscurin, cytoskeletal calmodulin and titin-interacting RhoGEF          |
| GO apoptosis | 41 | 444 | 0.0306553 | 8462 Kruppel-like factor 11                                                   |
| GO apoptosis | 41 | 444 | 0.0306553 | 8744 tumor necrosis factor (ligand) superfamily, member 9                     |
| GO apoptosis | 41 | 444 | 0.0306553 | 8793 tumor necrosis factor receptor superfamily, member 10d, decoy with t     |
| GO apoptosis | 41 | 444 | 0.0306553 | 8794 tumor necrosis factor receptor superfamily, member 10c, decoy witho      |
| GO apoptosis | 41 | 444 | 0.0306553 | 9263 serine/threonine kinase 17a                                              |
| GO apoptosis | 41 | 444 | 0.0306553 | 929 CD14 molecule                                                             |

|                                           |    |     |           |                                                                              |
|-------------------------------------------|----|-----|-----------|------------------------------------------------------------------------------|
| GO apoptosis                              | 41 | 444 | 0.0306553 | 9445 integral membrane protein 2B                                            |
| GO apoptosis                              | 41 | 444 | 0.0306553 | 9459 Rac/Cdc42 guanine nucleotide exchange factor (GEF) 6                    |
| GO platelet-derived growth factor recept  | 4  | 18  | 0.0307275 | 10628 thioredoxin interacting protein                                        |
| GO platelet-derived growth factor recept  | 4  | 18  | 0.0307275 | 5327 plasminogen activator, tissue                                           |
| GO platelet-derived growth factor recept  | 4  | 18  | 0.0307275 | 64651 cysteine-serine-rich nuclear protein 1                                 |
| GO platelet-derived growth factor recept  | 4  | 18  | 0.0307275 | 84159 AT rich interactive domain 5B (MRF1-like)                              |
| GO protein ubiquitination involved in ubi | 4  | 18  | 0.0307275 | 154214 ring finger protein 217                                               |
| GO protein ubiquitination involved in ubi | 4  | 18  | 0.0307275 | 255488 ring finger protein 144B                                              |
| GO protein ubiquitination involved in ubi | 4  | 18  | 0.0307275 | 29116 myosin regulatory light chain interacting protein                      |
| GO protein ubiquitination involved in ubi | 4  | 18  | 0.0307275 | 5071 Parkinson disease (autosomal recessive, juvenile) 2, parkin             |
| GO endocrine pancreas development         | 4  | 18  | 0.0307275 | 222546 regulatory factor X, 6                                                |
| GO endocrine pancreas development         | 4  | 18  | 0.0307275 | 3175 one cut homeobox 1                                                      |
| GO endocrine pancreas development         | 4  | 18  | 0.0307275 | 3569 interleukin 6 (interferon, beta 2)                                      |
| GO endocrine pancreas development         | 4  | 18  | 0.0307275 | 3570 interleukin 6 receptor                                                  |
| GO response to corticosterone stimulus    | 4  | 18  | 0.0307275 | 2353 FBJ murine osteosarcoma viral oncogene homolog                          |
| GO response to corticosterone stimulus    | 4  | 18  | 0.0307275 | 3726 jun B proto-oncogene                                                    |
| GO response to corticosterone stimulus    | 4  | 18  | 0.0307275 | 4129 monoamine oxidase B                                                     |
| GO response to corticosterone stimulus    | 4  | 18  | 0.0307275 | 5742 prostaglandin-endoperoxide synthase 1 (prostaglandin G/H synthase a     |
| GO pituitary gland development            | 4  | 18  | 0.0307275 | 2624 GATA binding protein 2                                                  |
| GO pituitary gland development            | 4  | 18  | 0.0307275 | 5122 proprotein convertase subtilisin/kexin type 1                           |
| GO pituitary gland development            | 4  | 18  | 0.0307275 | 5307 paired-like homeodomain 1                                               |
| GO pituitary gland development            | 4  | 18  | 0.0307275 | 652 bone morphogenetic protein 4                                             |
| GO cellular process                       | 4  | 18  | 0.0307275 | 3725 jun oncogene                                                            |
| GO cellular process                       | 4  | 18  | 0.0307275 | 3726 jun B proto-oncogene                                                    |
| GO cellular process                       | 4  | 18  | 0.0307275 | 5066 peptidylglycine alpha-amidating monooxygenase                           |
| GO cellular process                       | 4  | 18  | 0.0307275 | 8509 N-deacetylase/N-sulfotransferase (heparan glucosaminyl) 2               |
| GO cortical cytoskeleton                  | 4  | 18  | 0.0307275 | 6521 solute carrier family 4, anion exchanger, member 1 (erythrocyte memb    |
| GO cortical cytoskeleton                  | 4  | 18  | 0.0307275 | 7111 tropomodulin 1                                                          |
| GO cortical cytoskeleton                  | 4  | 18  | 0.0307275 | 7170 tropomyosin 3                                                           |
| GO cortical cytoskeleton                  | 4  | 18  | 0.0307275 | 7223 transient receptor potential cation channel, subfamily C, member 4      |
| GO protein amino acid glycosylation       | 9  | 65  | 0.031965  | 10317 UDP-Gal:betaGlcNAc beta 1,3-galactosyltransferase, polypeptide 5       |
| GO protein amino acid glycosylation       | 9  | 65  | 0.031965  | 192134 UDP-GlcNAc:betaGal beta-1,3-N-acetylglucosaminyltransferase 6 (core   |
| GO protein amino acid glycosylation       | 9  | 65  | 0.031965  | 2525 fucosyltransferase 3 (galactoside 3(4)-L-fucosyltransferase, Lewis bloo |
| GO protein amino acid glycosylation       | 9  | 65  | 0.031965  | 2526 fucosyltransferase 4 (alpha (1,3) fucosyltransferase, myeloid-specific) |
| GO protein amino acid glycosylation       | 9  | 65  | 0.031965  | 27090 ST6 (alpha-N-acetyl-neuraminy-2,3-beta-galactosyl-1,3)-N-acetylgalact  |
| GO protein amino acid glycosylation       | 9  | 65  | 0.031965  | 55808 ST6 (alpha-N-acetyl-neuraminy-2,3-beta-galactosyl-1,3)-N-acetylgalact  |

|                                         |    |     |           |                                                                           |
|-----------------------------------------|----|-----|-----------|---------------------------------------------------------------------------|
| GO protein amino acid glycosylation     | 9  | 65  | 0.031965  | 6484 ST3 beta-galactoside alpha-2,3-sialyltransferase 4                   |
| GO protein amino acid glycosylation     | 9  | 65  | 0.031965  | 6489 ST8 alpha-N-acetyl-neuraminide alpha-2,8-sialyltransferase 1         |
| GO protein amino acid glycosylation     | 9  | 65  | 0.031965  | 8706 beta-1,3-N-acetylgalactosaminyltransferase 1 (globoside blood group) |
| GO iron ion binding                     | 9  | 65  | 0.031965  | 10826 chromosome 5 open reading frame 4                                   |
| GO iron ion binding                     | 9  | 65  | 0.031965  | 240 arachidonate 5-lipoxygenase                                           |
| GO iron ion binding                     | 9  | 65  | 0.031965  | 27035 NADPH oxidase 1                                                     |
| GO iron ion binding                     | 9  | 65  | 0.031965  | 316 aldehyde oxidase 1                                                    |
| GO iron ion binding                     | 9  | 65  | 0.031965  | 5053 phenylalanine hydroxylase                                            |
| GO iron ion binding                     | 9  | 65  | 0.031965  | 5351 procollagen-lysine 1, 2-oxoglutarate 5-dioxygenase 1                 |
| GO iron ion binding                     | 9  | 65  | 0.031965  | 54681 prolyl 4-hydroxylase, transmembrane (endoplasmic reticulum)         |
| GO iron ion binding                     | 9  | 65  | 0.031965  | 59344 arachidonate lipoxygenase 3                                         |
| GO iron ion binding                     | 9  | 65  | 0.031965  | 79689 STEAP family member 4                                               |
| GO transforming growth factor beta rece | 8  | 55  | 0.0323494 | 2353 FBJ murine osteosarcoma viral oncogene homolog                       |
| GO transforming growth factor beta rece | 8  | 55  | 0.0323494 | 3725 jun oncogene                                                         |
| GO transforming growth factor beta rece | 8  | 55  | 0.0323494 | 4087 SMAD family member 2                                                 |
| GO transforming growth factor beta rece | 8  | 55  | 0.0323494 | 5371 promyelocytic leukemia                                               |
| GO transforming growth factor beta rece | 8  | 55  | 0.0323494 | 7049 transforming growth factor, beta receptor III                        |
| GO transforming growth factor beta rece | 8  | 55  | 0.0323494 | 7071 Kruppel-like factor 10                                               |
| GO transforming growth factor beta rece | 8  | 55  | 0.0323494 | 94 activin A receptor type II-like 1                                      |
| GO transforming growth factor beta rece | 8  | 55  | 0.0323494 | 9518 growth differentiation factor 15                                     |
| GO transmembrane receptor activity      | 13 | 108 | 0.0326637 | 10913 ectodysplasin A receptor                                            |
| GO transmembrane receptor activity      | 13 | 108 | 0.0326637 | 1364 claudin 4                                                            |
| GO transmembrane receptor activity      | 13 | 108 | 0.0326637 | 1380 complement component (3d/Epstein Barr virus) receptor 2              |
| GO transmembrane receptor activity      | 13 | 108 | 0.0326637 | 30008 EGF-containing fibulin-like extracellular matrix protein 2          |
| GO transmembrane receptor activity      | 13 | 108 | 0.0326637 | 3823 killer cell lectin-like receptor subfamily C, member 3               |
| GO transmembrane receptor activity      | 13 | 108 | 0.0326637 | 3949 low density lipoprotein receptor                                     |
| GO transmembrane receptor activity      | 13 | 108 | 0.0326637 | 6653 sortilin-related receptor, L(DLR class) A repeats-containing         |
| GO transmembrane receptor activity      | 13 | 108 | 0.0326637 | 7097 toll-like receptor 2                                                 |
| GO transmembrane receptor activity      | 13 | 108 | 0.0326637 | 7098 toll-like receptor 3                                                 |
| GO transmembrane receptor activity      | 13 | 108 | 0.0326637 | 7099 toll-like receptor 4                                                 |
| GO transmembrane receptor activity      | 13 | 108 | 0.0326637 | 7100 toll-like receptor 5                                                 |
| GO transmembrane receptor activity      | 13 | 108 | 0.0326637 | 8793 tumor necrosis factor receptor superfamily, member 10d, decoy with t |
| GO transmembrane receptor activity      | 13 | 108 | 0.0326637 | 8794 tumor necrosis factor receptor superfamily, member 10c, decoy witho  |
| GO odontogenesis of dentine-containing  | 6  | 36  | 0.0336095 | 2296 forkhead box C1                                                      |
| GO odontogenesis of dentine-containing  | 6  | 36  | 0.0336095 | 2737 GLI family zinc finger 3                                             |
| GO odontogenesis of dentine-containing  | 6  | 36  | 0.0336095 | 3911 laminin, alpha 5                                                     |

|                                            |   |    |           |                                                                               |
|--------------------------------------------|---|----|-----------|-------------------------------------------------------------------------------|
| GO odontogenesis of dentine-containing     | 6 | 36 | 0.0336095 | 652 bone morphogenetic protein 4                                              |
| GO odontogenesis of dentine-containing     | 6 | 36 | 0.0336095 | 682 basigin (Ok blood group)                                                  |
| GO odontogenesis of dentine-containing     | 6 | 36 | 0.0336095 | 760 carbonic anhydrase II                                                     |
| GO response to cold                        | 5 | 27 | 0.0339066 | 154 adrenergic, beta-2-, receptor, surface                                    |
| GO response to cold                        | 5 | 27 | 0.0339066 | 183 angiotensinogen (serpin peptidase inhibitor, clade A, member 8)           |
| GO response to cold                        | 5 | 27 | 0.0339066 | 2353 FBJ murine osteosarcoma viral oncogene homolog                           |
| GO response to cold                        | 5 | 27 | 0.0339066 | 5367 pro-melanin-concentrating hormone                                        |
| GO response to cold                        | 5 | 27 | 0.0339066 | 8531 cold shock domain protein A                                              |
| GO retinol dehydrogenase activity          | 3 | 11 | 0.0347288 | 10170 dehydrogenase/reductase (SDR family) member 9                           |
| GO retinol dehydrogenase activity          | 3 | 11 | 0.0347288 | 157506 retinol dehydrogenase 10 (all-trans)                                   |
| GO retinol dehydrogenase activity          | 3 | 11 | 0.0347288 | 195814 short chain dehydrogenase/reductase family 16C, member 5               |
| GO negative regulation of osteoclast diffi | 3 | 11 | 0.0347288 | 10766 transducer of ERBB2, 2                                                  |
| GO negative regulation of osteoclast diffi | 3 | 11 | 0.0347288 | 7098 toll-like receptor 3                                                     |
| GO negative regulation of osteoclast diffi | 3 | 11 | 0.0347288 | 7099 toll-like receptor 4                                                     |
| GO sphingolipid biosynthetic process       | 3 | 11 | 0.0347288 | 123099 degenerative spermatocyte homolog 2, lipid desaturase (Drosophila)     |
| GO sphingolipid biosynthetic process       | 3 | 11 | 0.0347288 | 165679 chromosome 3 open reading frame 57                                     |
| GO sphingolipid biosynthetic process       | 3 | 11 | 0.0347288 | 55304 serine palmitoyltransferase, long chain base subunit 3                  |
| GO transforming growth factor beta rece    | 3 | 11 | 0.0347288 | 130399 activin A receptor, type IC                                            |
| GO transforming growth factor beta rece    | 3 | 11 | 0.0347288 | 7049 transforming growth factor, beta receptor III                            |
| GO transforming growth factor beta rece    | 3 | 11 | 0.0347288 | 94 activin A receptor type II-like 1                                          |
| GO positive regulation of cellular protein | 3 | 11 | 0.0347288 | 1435 colony stimulating factor 1 (macrophage)                                 |
| GO positive regulation of cellular protein | 3 | 11 | 0.0347288 | 183 angiotensinogen (serpin peptidase inhibitor, clade A, member 8)           |
| GO positive regulation of cellular protein | 3 | 11 | 0.0347288 | 4792 nuclear factor of kappa light polypeptide gene enhancer in B-cells inhib |
| GO arachidonic acid secretion              | 3 | 11 | 0.0347288 | 1813 dopamine receptor D2                                                     |
| GO arachidonic acid secretion              | 3 | 11 | 0.0347288 | 1815 dopamine receptor D4                                                     |
| GO arachidonic acid secretion              | 3 | 11 | 0.0347288 | 56923 neuromedin U receptor 2                                                 |
| GO peptide hormone processing              | 3 | 11 | 0.0347288 | 25825 beta-site APP-cleaving enzyme 2                                         |
| GO peptide hormone processing              | 3 | 11 | 0.0347288 | 5046 proprotein convertase subtilisin/kexin type 6                            |
| GO peptide hormone processing              | 3 | 11 | 0.0347288 | 5122 proprotein convertase subtilisin/kexin type 1                            |
| GO positive regulation of interleukin-1 be | 3 | 11 | 0.0347288 | 29108 PYD and CARD domain containing                                          |
| GO positive regulation of interleukin-1 be | 3 | 11 | 0.0347288 | 64127 nucleotide-binding oligomerization domain containing 2                  |
| GO positive regulation of interleukin-1 be | 3 | 11 | 0.0347288 | 834 caspase 1, apoptosis-related cysteine peptidase (interleukin 1, beta, co  |
| GO basal lamina                            | 3 | 11 | 0.0347288 | 375790 agrin                                                                  |
| GO basal lamina                            | 3 | 11 | 0.0347288 | 3911 laminin, alpha 5                                                         |
| GO basal lamina                            | 3 | 11 | 0.0347288 | 3913 laminin, beta 2 (laminin S)                                              |
| GO I-kappaB phosphorylation                | 3 | 11 | 0.0347288 | 7097 toll-like receptor 2                                                     |

|    |                                       |    |     |           |        |                                                                       |
|----|---------------------------------------|----|-----|-----------|--------|-----------------------------------------------------------------------|
| GO | I-kappaB phosphorylation              | 3  | 11  | 0.0347288 | 7098   | toll-like receptor 3                                                  |
| GO | I-kappaB phosphorylation              | 3  | 11  | 0.0347288 | 7099   | toll-like receptor 4                                                  |
| GO | cellular response to insulin stimulus | 7  | 46  | 0.0353627 | 10014  | histone deacetylase 5                                                 |
| GO | cellular response to insulin stimulus | 7  | 46  | 0.0353627 | 255738 | proprotein convertase subtilisin/kexin type 9                         |
| GO | cellular response to insulin stimulus | 7  | 46  | 0.0353627 | 3643   | insulin receptor                                                      |
| GO | cellular response to insulin stimulus | 7  | 46  | 0.0353627 | 51703  | acyl-CoA synthetase long-chain family member 5                        |
| GO | cellular response to insulin stimulus | 7  | 46  | 0.0353627 | 6256   | retinoid X receptor, alpha                                            |
| GO | cellular response to insulin stimulus | 7  | 46  | 0.0353627 | 8660   | insulin receptor substrate 2                                          |
| GO | cellular response to insulin stimulus | 7  | 46  | 0.0353627 | 9734   | histone deacetylase 9                                                 |
| GO | external side of plasma membrane      | 14 | 121 | 0.0366976 | 1508   | cathepsin B                                                           |
| GO | external side of plasma membrane      | 14 | 121 | 0.0366976 | 2205   | Fc fragment of IgE, high affinity I, receptor for; alpha polypeptide  |
| GO | external side of plasma membrane      | 14 | 121 | 0.0366976 | 29126  | CD274 molecule                                                        |
| GO | external side of plasma membrane      | 14 | 121 | 0.0366976 | 3561   | interleukin 2 receptor, gamma (severe combined immunodeficiency)      |
| GO | external side of plasma membrane      | 14 | 121 | 0.0366976 | 3678   | integrin, alpha 5 (fibronectin receptor, alpha polypeptide)           |
| GO | external side of plasma membrane      | 14 | 121 | 0.0366976 | 3687   | integrin, alpha X (complement component 3 receptor 4 subunit)         |
| GO | external side of plasma membrane      | 14 | 121 | 0.0366976 | 3815   | v-kit Hardy-Zuckerman 4 feline sarcoma viral oncogene homolog         |
| GO | external side of plasma membrane      | 14 | 121 | 0.0366976 | 4684   | neural cell adhesion molecule 1                                       |
| GO | external side of plasma membrane      | 14 | 121 | 0.0366976 | 55867  | solute carrier family 22 (organic anion/urate transporter), member 11 |
| GO | external side of plasma membrane      | 14 | 121 | 0.0366976 | 6402   | selectin L                                                            |
| GO | external side of plasma membrane      | 14 | 121 | 0.0366976 | 7049   | transforming growth factor, beta receptor III                         |
| GO | external side of plasma membrane      | 14 | 121 | 0.0366976 | 7097   | toll-like receptor 2                                                  |
| GO | external side of plasma membrane      | 14 | 121 | 0.0366976 | 7099   | toll-like receptor 4                                                  |
| GO | external side of plasma membrane      | 14 | 121 | 0.0366976 | 9619   | ATP-binding cassette, sub-family G (WHITE), member 1                  |
| GO | neutrophil chemotaxis                 | 4  | 19  | 0.0368754 | 1906   | endothelin 1                                                          |
| GO | neutrophil chemotaxis                 | 4  | 19  | 0.0368754 | 2921   | chemokine (C-X-C motif) ligand 3                                      |
| GO | neutrophil chemotaxis                 | 4  | 19  | 0.0368754 | 3689   | integrin, beta 2 (complement component 3 receptor 3 and 4 subunit)    |
| GO | neutrophil chemotaxis                 | 4  | 19  | 0.0368754 | 6850   | spleen tyrosine kinase                                                |
| GO | positive regulation of MAP kinase act | 4  | 19  | 0.0368754 | 1906   | endothelin 1                                                          |
| GO | positive regulation of MAP kinase act | 4  | 19  | 0.0368754 | 3815   | v-kit Hardy-Zuckerman 4 feline sarcoma viral oncogene homolog         |
| GO | positive regulation of MAP kinase act | 4  | 19  | 0.0368754 | 3845   | v-Ki-ras2 Kirsten rat sarcoma viral oncogene homolog                  |
| GO | positive regulation of MAP kinase act | 4  | 19  | 0.0368754 | 4254   | KIT ligand                                                            |
| GO | positive regulation of JNK cascade    | 4  | 19  | 0.0368754 | 28996  | homeodomain interacting protein kinase 2                              |
| GO | positive regulation of JNK cascade    | 4  | 19  | 0.0368754 | 64127  | nucleotide-binding oligomerization domain containing 2                |
| GO | positive regulation of JNK cascade    | 4  | 19  | 0.0368754 | 7098   | toll-like receptor 3                                                  |
| GO | positive regulation of JNK cascade    | 4  | 19  | 0.0368754 | 7099   | toll-like receptor 4                                                  |
| GO | serine-type endopeptidase activity    | 16 | 144 | 0.0371879 | 10942  | protease, serine, 21 (testisin)                                       |

|    |                                                   |    |     |           |                                                                           |
|----|---------------------------------------------------|----|-----|-----------|---------------------------------------------------------------------------|
| GO | serine-type endopeptidase activity                | 16 | 144 | 0.0371879 | 11202 kallikrein-related peptidase 8                                      |
| GO | serine-type endopeptidase activity                | 16 | 144 | 0.0371879 | 1803 dipeptidyl-peptidase 4                                               |
| GO | serine-type endopeptidase activity                | 16 | 144 | 0.0371879 | 255738 proprotein convertase subtilisin/kexin type 9                      |
| GO | serine-type endopeptidase activity                | 16 | 144 | 0.0371879 | 5046 proprotein convertase subtilisin/kexin type 6                        |
| GO | serine-type endopeptidase activity                | 16 | 144 | 0.0371879 | 5122 proprotein convertase subtilisin/kexin type 1                        |
| GO | serine-type endopeptidase activity                | 16 | 144 | 0.0371879 | 51279 complement component 1, r subcomponent-like                         |
| GO | serine-type endopeptidase activity                | 16 | 144 | 0.0371879 | 5327 plasminogen activator, tissue                                        |
| GO | serine-type endopeptidase activity                | 16 | 144 | 0.0371879 | 54933 rhomboid, veinlet-like 2 (Drosophila)                               |
| GO | serine-type endopeptidase activity                | 16 | 144 | 0.0371879 | 5648 mannan-binding lectin serine peptidase 1 (C4/C2 activating component |
| GO | serine-type endopeptidase activity                | 16 | 144 | 0.0371879 | 5655 kallikrein-related peptidase 10                                      |
| GO | serine-type endopeptidase activity                | 16 | 144 | 0.0371879 | 56649 transmembrane protease, serine 4                                    |
| GO | serine-type endopeptidase activity                | 16 | 144 | 0.0371879 | 629 complement factor B                                                   |
| GO | serine-type endopeptidase activity                | 16 | 144 | 0.0371879 | 64699 transmembrane protease, serine 3                                    |
| GO | serine-type endopeptidase activity                | 16 | 144 | 0.0371879 | 715 complement component 1, r subcomponent                                |
| GO | serine-type endopeptidase activity                | 16 | 144 | 0.0371879 | 717 complement component 2                                                |
| GO | integrin complex                                  | 5  | 28  | 0.0390333 | 3678 integrin, alpha 5 (fibronectin receptor, alpha polypeptide)          |
| GO | integrin complex                                  | 5  | 28  | 0.0390333 | 3687 integrin, alpha X (complement component 3 receptor 4 subunit)        |
| GO | integrin complex                                  | 5  | 28  | 0.0390333 | 3689 integrin, beta 2 (complement component 3 receptor 3 and 4 subunit)   |
| GO | integrin complex                                  | 5  | 28  | 0.0390333 | 3691 integrin, beta 4                                                     |
| GO | integrin complex                                  | 5  | 28  | 0.0390333 | 3696 integrin, beta 8                                                     |
| GO | lung morphogenesis                                | 2  | 5   | 0.0406292 | 10253 sprouty homolog 2 (Drosophila)                                      |
| GO | lung morphogenesis                                | 2  | 5   | 0.0406292 | 652 bone morphogenetic protein 4                                          |
| GO | activation of MAPKKK activity                     | 2  | 5   | 0.0406292 | 10912 growth arrest and DNA-damage-inducible, gamma                       |
| GO | activation of MAPKKK activity                     | 2  | 5   | 0.0406292 | 4616 growth arrest and DNA-damage-inducible, beta                         |
| GO | branching involved in mammary gland morphogenesis | 2  | 5   | 0.0406292 | 1435 colony stimulating factor 1 (macrophage)                             |
| GO | branching involved in mammary gland morphogenesis | 2  | 5   | 0.0406292 | 5371 promyelocytic leukemia                                               |
| GO | positive regulation of sodium ion transport       | 2  | 5   | 0.0406292 | 154 adrenergic, beta-2-, receptor, surface                                |
| GO | positive regulation of sodium ion transport       | 2  | 5   | 0.0406292 | 154043 CNKSR family member 3                                              |
| GO | monoterpenoid metabolic process                   | 2  | 5   | 0.0406292 | 1559 cytochrome P450, family 2, subfamily C, polypeptide 9                |
| GO | monoterpenoid metabolic process                   | 2  | 5   | 0.0406292 | 1571 cytochrome P450, family 2, subfamily E, polypeptide 1                |
| GO | serine C-palmitoyltransferase activity            | 2  | 5   | 0.0406292 | 165679 chromosome 3 open reading frame 57                                 |
| GO | serine C-palmitoyltransferase activity            | 2  | 5   | 0.0406292 | 55304 serine palmitoyltransferase, long chain base subunit 3              |
| GO | serine C-palmitoyltransferase complex             | 2  | 5   | 0.0406292 | 165679 chromosome 3 open reading frame 57                                 |
| GO | serine C-palmitoyltransferase complex             | 2  | 5   | 0.0406292 | 55304 serine palmitoyltransferase, long chain base subunit 3              |
| GO | pattern recognition receptor activity             | 2  | 5   | 0.0406292 | 1755 deleted in malignant brain tumors 1                                  |
| GO | pattern recognition receptor activity             | 2  | 5   | 0.0406292 | 7097 toll-like receptor 2                                                 |

|                                            |   |    |           |                                                                     |
|--------------------------------------------|---|----|-----------|---------------------------------------------------------------------|
| GO inhibition of adenylate cyclase activit | 2 | 5  | 0.0406292 | 1813 dopamine receptor D2                                           |
| GO inhibition of adenylate cyclase activit | 2 | 5  | 0.0406292 | 1815 dopamine receptor D4                                           |
| GO nerve-nerve synaptic transmission       | 2 | 5  | 0.0406292 | 1813 dopamine receptor D2                                           |
| GO nerve-nerve synaptic transmission       | 2 | 5  | 0.0406292 | 23095 kinesin family member 1B                                      |
| GO fear response                           | 2 | 5  | 0.0406292 | 1815 dopamine receptor D4                                           |
| GO fear response                           | 2 | 5  | 0.0406292 | 627 brain-derived neurotrophic factor                               |
| GO protein tyrosine/threonine phosphat     | 2 | 5  | 0.0406292 | 1843 dual specificity phosphatase 1                                 |
| GO protein tyrosine/threonine phosphat     | 2 | 5  | 0.0406292 | 1844 dual specificity phosphatase 2                                 |
| GO mitogen-activated protein kinase bin    | 2 | 5  | 0.0406292 | 1844 dual specificity phosphatase 2                                 |
| GO mitogen-activated protein kinase bin    | 2 | 5  | 0.0406292 | 2033 E1A binding protein p300                                       |
| GO microfibril                             | 2 | 5  | 0.0406292 | 2200 fibrillin 1                                                    |
| GO microfibril                             | 2 | 5  | 0.0406292 | 8076 microfibrillar associated protein 5                            |
| GO paraxial mesoderm formation             | 2 | 5  | 0.0406292 | 2296 forkhead box C1                                                |
| GO paraxial mesoderm formation             | 2 | 5  | 0.0406292 | 2303 forkhead box C2 (MFH-1, mesenchyme forkhead 1)                 |
| GO neutrophil mediated immunity            | 2 | 5  | 0.0406292 | 3569 interleukin 6 (interferon, beta 2)                             |
| GO neutrophil mediated immunity            | 2 | 5  | 0.0406292 | 3570 interleukin 6 receptor                                         |
| GO positive regulation of immunoglobuli    | 2 | 5  | 0.0406292 | 3569 interleukin 6 (interferon, beta 2)                             |
| GO positive regulation of immunoglobuli    | 2 | 5  | 0.0406292 | 5950 retinol binding protein 4, plasma                              |
| GO negative regulation of transporter ac   | 2 | 5  | 0.0406292 | 3643 insulin receptor                                               |
| GO negative regulation of transporter ac   | 2 | 5  | 0.0406292 | 6622 synuclein, alpha (non A4 component of amyloid precursor)       |
| GO negative regulation of focal adhesion   | 2 | 5  | 0.0406292 | 395 Rho GTPase activating protein 6                                 |
| GO negative regulation of focal adhesion   | 2 | 5  | 0.0406292 | 94 activin A receptor type II-like 1                                |
| GO response to cholesterol                 | 2 | 5  | 0.0406292 | 4087 SMAD family member 2                                           |
| GO response to cholesterol                 | 2 | 5  | 0.0406292 | 51703 acyl-CoA synthetase long-chain family member 5                |
| GO amine oxidase activity                  | 2 | 5  | 0.0406292 | 4128 monoamine oxidase A                                            |
| GO amine oxidase activity                  | 2 | 5  | 0.0406292 | 4129 monoamine oxidase B                                            |
| GO regulation of cardiac muscle contract   | 2 | 5  | 0.0406292 | 4842 nitric oxide synthase 1 (neuronal)                             |
| GO regulation of cardiac muscle contract   | 2 | 5  | 0.0406292 | 5025 purinergic receptor P2X, ligand-gated ion channel, 4           |
| GO entrainment of circadian clock          | 2 | 5  | 0.0406292 | 5187 period homolog 1 (Drosophila)                                  |
| GO entrainment of circadian clock          | 2 | 5  | 0.0406292 | 8553 basic helix-loop-helix family, member e40                      |
| GO prostaglandin E receptor activity       | 2 | 5  | 0.0406292 | 5732 prostaglandin E receptor 2 (subtype EP2), 53kDa                |
| GO prostaglandin E receptor activity       | 2 | 5  | 0.0406292 | 5734 prostaglandin E receptor 4 (subtype EP4)                       |
| GO negative regulation of growth of sym    | 2 | 5  | 0.0406292 | 64127 nucleotide-binding oligomerization domain containing 2        |
| GO negative regulation of growth of sym    | 2 | 5  | 0.0406292 | 7097 toll-like receptor 2                                           |
| GO cell-matrix adhesion                    | 9 | 68 | 0.0411625 | 10516 fibulin 5                                                     |
| GO cell-matrix adhesion                    | 9 | 68 | 0.0411625 | 183 angiotensinogen (serpin peptidase inhibitor, clade A, member 8) |



|                                      |    |     |           |                                                                            |
|--------------------------------------|----|-----|-----------|----------------------------------------------------------------------------|
| GO cell-matrix adhesion              | 9  | 68  | 0.0411625 | 22795 nidogen 2 (osteonidogen)                                             |
| GO cell-matrix adhesion              | 9  | 68  | 0.0411625 | 27076 LY6/PLAUR domain containing 3                                        |
| GO cell-matrix adhesion              | 9  | 68  | 0.0411625 | 3689 integrin, beta 2 (complement component 3 receptor 3 and 4 subunit)    |
| GO cell-matrix adhesion              | 9  | 68  | 0.0411625 | 3691 integrin, beta 4                                                      |
| GO cell-matrix adhesion              | 9  | 68  | 0.0411625 | 3696 integrin, beta 8                                                      |
| GO cell-matrix adhesion              | 9  | 68  | 0.0411625 | 51754 transmembrane protein 8B                                             |
| GO cell-matrix adhesion              | 9  | 68  | 0.0411625 | 8751 ADAM metallopeptidase domain 15                                       |
| GO protein homodimerization activity | 34 | 365 | 0.0411734 | 11213 interleukin-1 receptor-associated kinase 3                           |
| GO protein homodimerization activity | 34 | 365 | 0.0411734 | 1139 cholinergic receptor, nicotinic, alpha 7                              |
| GO protein homodimerization activity | 34 | 365 | 0.0411734 | 116113 forkhead box P4                                                     |
| GO protein homodimerization activity | 34 | 365 | 0.0411734 | 127343 diencephalon/mesencephalon homeobox 1                               |
| GO protein homodimerization activity | 34 | 365 | 0.0411734 | 1380 complement component (3d/Epstein Barr virus) receptor 2               |
| GO protein homodimerization activity | 34 | 365 | 0.0411734 | 1435 colony stimulating factor 1 (macrophage)                              |
| GO protein homodimerization activity | 34 | 365 | 0.0411734 | 154 adrenergic, beta-2-, receptor, surface                                 |
| GO protein homodimerization activity | 34 | 365 | 0.0411734 | 1803 dipeptidyl-peptidase 4                                                |
| GO protein homodimerization activity | 34 | 365 | 0.0411734 | 1820 AT rich interactive domain 3A (BRIGHT-like)                           |
| GO protein homodimerization activity | 34 | 365 | 0.0411734 | 2026 enolase 2 (gamma, neuronal)                                           |
| GO protein homodimerization activity | 34 | 365 | 0.0411734 | 2122 MDS1 and EVI1 complex locus                                           |
| GO protein homodimerization activity | 34 | 365 | 0.0411734 | 22807 IKAROS family zinc finger 2 (Helios)                                 |
| GO protein homodimerization activity | 34 | 365 | 0.0411734 | 29108 PYD and CARD domain containing                                       |
| GO protein homodimerization activity | 34 | 365 | 0.0411734 | 3164 nuclear receptor subfamily 4, group A, member 1                       |
| GO protein homodimerization activity | 34 | 365 | 0.0411734 | 3570 interleukin 6 receptor                                                |
| GO protein homodimerization activity | 34 | 365 | 0.0411734 | 4129 monoamine oxidase B                                                   |
| GO protein homodimerization activity | 34 | 365 | 0.0411734 | 429 achaete-scute complex homolog 1 (Drosophila)                           |
| GO protein homodimerization activity | 34 | 365 | 0.0411734 | 4293 mitogen-activated protein kinase kinase kinase 9                      |
| GO protein homodimerization activity | 34 | 365 | 0.0411734 | 4692 necdin homolog (mouse)                                                |
| GO protein homodimerization activity | 34 | 365 | 0.0411734 | 5025 purinergic receptor P2X, ligand-gated ion channel, 4                  |
| GO protein homodimerization activity | 34 | 365 | 0.0411734 | 5053 phenylalanine hydroxylase                                             |
| GO protein homodimerization activity | 34 | 365 | 0.0411734 | 51085 MLX interacting protein-like                                         |
| GO protein homodimerization activity | 34 | 365 | 0.0411734 | 5351 procollagen-lysine 1, 2-oxoglutarate 5-dioxygenase 1                  |
| GO protein homodimerization activity | 34 | 365 | 0.0411734 | 5371 promyelocytic leukemia                                                |
| GO protein homodimerization activity | 34 | 365 | 0.0411734 | 5648 mannan-binding lectin serine peptidase 1 (C4/C2 activating component) |
| GO protein homodimerization activity | 34 | 365 | 0.0411734 | 57453 Down syndrome cell adhesion molecule like 1                          |
| GO protein homodimerization activity | 34 | 365 | 0.0411734 | 57863 cell adhesion molecule 3                                             |
| GO protein homodimerization activity | 34 | 365 | 0.0411734 | 5791 protein tyrosine phosphatase, receptor type, E                        |
| GO protein homodimerization activity | 34 | 365 | 0.0411734 | 652 bone morphogenetic protein 4                                           |

|                                          |    |     |           |                                                                               |
|------------------------------------------|----|-----|-----------|-------------------------------------------------------------------------------|
| GO protein homodimerization activity     | 34 | 365 | 0.0411734 | 6521 solute carrier family 4, anion exchanger, member 1 (erythrocyte memb     |
| GO protein homodimerization activity     | 34 | 365 | 0.0411734 | 7026 nuclear receptor subfamily 2, group F, member 2                          |
| GO protein homodimerization activity     | 34 | 365 | 0.0411734 | 81603 tripartite motif-containing 8                                           |
| GO protein homodimerization activity     | 34 | 365 | 0.0411734 | 8527 diacylglycerol kinase, delta 130kDa                                      |
| GO protein homodimerization activity     | 34 | 365 | 0.0411734 | 9619 ATP-binding cassette, sub-family G (WHITE), member 1                     |
| GO negative regulation of cell migration | 6  | 38  | 0.0424786 | 10076 protein tyrosine phosphatase, receptor type, U                          |
| GO negative regulation of cell migration | 6  | 38  | 0.0424786 | 1813 dopamine receptor D2                                                     |
| GO negative regulation of cell migration | 6  | 38  | 0.0424786 | 3488 insulin-like growth factor binding protein 5                             |
| GO negative regulation of cell migration | 6  | 38  | 0.0424786 | 375056 melanoma inhibitory activity family, member 3                          |
| GO negative regulation of cell migration | 6  | 38  | 0.0424786 | 8646 chordin                                                                  |
| GO negative regulation of cell migration | 6  | 38  | 0.0424786 | 94 activin A receptor type II-like 1                                          |
| GO response to mechanical stimulus       | 6  | 38  | 0.0424786 | 10628 thioredoxin interacting protein                                         |
| GO response to mechanical stimulus       | 6  | 38  | 0.0424786 | 1508 cathepsin B                                                              |
| GO response to mechanical stimulus       | 6  | 38  | 0.0424786 | 2353 FBJ murine osteosarcoma viral oncogene homolog                           |
| GO response to mechanical stimulus       | 6  | 38  | 0.0424786 | 3725 jun oncogene                                                             |
| GO response to mechanical stimulus       | 6  | 38  | 0.0424786 | 3726 jun B proto-oncogene                                                     |
| GO response to mechanical stimulus       | 6  | 38  | 0.0424786 | 652 bone morphogenetic protein 4                                              |
| GO transcription factor binding          | 18 | 170 | 0.0427318 | 10014 histone deacetylase 5                                                   |
| GO transcription factor binding          | 18 | 170 | 0.0427318 | 10221 tribbles homolog 1 (Drosophila)                                         |
| GO transcription factor binding          | 18 | 170 | 0.0427318 | 10891 peroxisome proliferator-activated receptor gamma, coactivator 1 alpha   |
| GO transcription factor binding          | 18 | 170 | 0.0427318 | 2033 E1A binding protein p300                                                 |
| GO transcription factor binding          | 18 | 170 | 0.0427318 | 2296 forkhead box C1                                                          |
| GO transcription factor binding          | 18 | 170 | 0.0427318 | 2354 FBJ murine osteosarcoma viral oncogene homolog B                         |
| GO transcription factor binding          | 18 | 170 | 0.0427318 | 2624 GATA binding protein 2                                                   |
| GO transcription factor binding          | 18 | 170 | 0.0427318 | 28951 tribbles homolog 2 (Drosophila)                                         |
| GO transcription factor binding          | 18 | 170 | 0.0427318 | 3725 jun oncogene                                                             |
| GO transcription factor binding          | 18 | 170 | 0.0427318 | 4087 SMAD family member 2                                                     |
| GO transcription factor binding          | 18 | 170 | 0.0427318 | 4792 nuclear factor of kappa light polypeptide gene enhancer in B-cells inhib |
| GO transcription factor binding          | 18 | 170 | 0.0427318 | 51085 MLX interacting protein-like                                            |
| GO transcription factor binding          | 18 | 170 | 0.0427318 | 5308 paired-like homeodomain 2                                                |
| GO transcription factor binding          | 18 | 170 | 0.0427318 | 5460 POU class 5 homeobox 1                                                   |
| GO transcription factor binding          | 18 | 170 | 0.0427318 | 6604 SWI/SNF related, matrix associated, actin dependent regulator of chrom   |
| GO transcription factor binding          | 18 | 170 | 0.0427318 | 8543 LIM domain only 4                                                        |
| GO transcription factor binding          | 18 | 170 | 0.0427318 | 9734 histone deacetylase 9                                                    |
| GO transcription factor binding          | 18 | 170 | 0.0427318 | 9935 v-maf musculoaponeurotic fibrosarcoma oncogene homolog B (avian)         |
| GO cytokine-mediated signaling pathway   | 7  | 48  | 0.0432871 | 11213 interleukin-1 receptor-associated kinase 3                              |

|                                                      |   |    |           |                                                                                     |
|------------------------------------------------------|---|----|-----------|-------------------------------------------------------------------------------------|
| GO cytokine-mediated signaling pathway               | 7 | 48 | 0.0432871 | 23529 cardiotrophin-like cytokine factor 1                                          |
| GO cytokine-mediated signaling pathway               | 7 | 48 | 0.0432871 | 3569 interleukin 6 (interferon, beta 2)                                             |
| GO cytokine-mediated signaling pathway               | 7 | 48 | 0.0432871 | 3570 interleukin 6 receptor                                                         |
| GO cytokine-mediated signaling pathway               | 7 | 48 | 0.0432871 | 3815 v-kit Hardy-Zuckerman 4 feline sarcoma viral oncogene homolog                  |
| GO cytokine-mediated signaling pathway               | 7 | 48 | 0.0432871 | 3845 v-Ki-ras2 Kirsten rat sarcoma viral oncogene homolog                           |
| GO cytokine-mediated signaling pathway               | 7 | 48 | 0.0432871 | 6778 signal transducer and activator of transcription 6, interleukin-4 inducer      |
| GO retina development in camera-type e               | 4 | 20 | 0.0436781 | 2055 ceroid-lipofuscinosis, neuronal 8 (epilepsy, progressive with mental ret       |
| GO retina development in camera-type e               | 4 | 20 | 0.0436781 | 4802 nuclear transcription factor Y, gamma                                          |
| GO retina development in camera-type e               | 4 | 20 | 0.0436781 | 5950 retinol binding protein 4, plasma                                              |
| GO retina development in camera-type e               | 4 | 20 | 0.0436781 | 652 bone morphogenetic protein 4                                                    |
| GO tumor necrosis factor receptor binding            | 4 | 20 | 0.0436781 | 8600 tumor necrosis factor (ligand) superfamily, member 11                          |
| GO tumor necrosis factor receptor binding            | 4 | 20 | 0.0436781 | 8740 tumor necrosis factor (ligand) superfamily, member 14                          |
| GO tumor necrosis factor receptor binding            | 4 | 20 | 0.0436781 | 8744 tumor necrosis factor (ligand) superfamily, member 9                           |
| GO tumor necrosis factor receptor binding            | 4 | 20 | 0.0436781 | 9966 tumor necrosis factor (ligand) superfamily, member 15                          |
| GO drug metabolic process                            | 3 | 12 | 0.0440067 | 1558 cytochrome P450, family 2, subfamily C, polypeptide 8                          |
| GO drug metabolic process                            | 3 | 12 | 0.0440067 | 1559 cytochrome P450, family 2, subfamily C, polypeptide 9                          |
| GO drug metabolic process                            | 3 | 12 | 0.0440067 | 1571 cytochrome P450, family 2, subfamily E, polypeptide 1                          |
| GO photoreceptor inner segment                       | 3 | 12 | 0.0440067 | 2026 enolase 2 (gamma, neuronal)                                                    |
| GO photoreceptor inner segment                       | 3 | 12 | 0.0440067 | 4842 nitric oxide synthase 1 (neuronal)                                             |
| GO photoreceptor inner segment                       | 3 | 12 | 0.0440067 | 5132 phosphodiesterase 4                                                            |
| GO response to pH                                    | 3 | 12 | 0.0440067 | 27035 NADPH oxidase 1                                                               |
| GO response to pH                                    | 3 | 12 | 0.0440067 | 412 steroid sulfatase (microsomal), isozyme S                                       |
| GO response to pH                                    | 3 | 12 | 0.0440067 | 760 carbonic anhydrase II                                                           |
| GO negative regulation of macrophage differentiation | 3 | 12 | 0.0440067 | 4792 nuclear factor of kappa light polypeptide gene enhancer in B-cells inhibitor 3 |
| GO negative regulation of macrophage differentiation | 3 | 12 | 0.0440067 | 5465 peroxisome proliferator-activated receptor alpha                               |
| GO negative regulation of macrophage differentiation | 3 | 12 | 0.0440067 | 9619 ATP-binding cassette, sub-family G (WHITE), member 1                           |
| GO positive regulation of interferon-beta production | 3 | 12 | 0.0440067 | 7097 toll-like receptor 2                                                           |
| GO positive regulation of interferon-beta production | 3 | 12 | 0.0440067 | 7098 toll-like receptor 3                                                           |
| GO positive regulation of interferon-beta production | 3 | 12 | 0.0440067 | 7099 toll-like receptor 4                                                           |
| GO metanephros development                           | 5 | 29 | 0.0446065 | 10252 sprouty homolog 1, antagonist of FGF signaling (Drosophila)                   |
| GO metanephros development                           | 5 | 29 | 0.0446065 | 157506 retinol dehydrogenase 10 (all-trans)                                         |
| GO metanephros development                           | 5 | 29 | 0.0446065 | 2303 forkhead box C2 (MFX-1, mesenchyme forkhead 1)                                 |
| GO metanephros development                           | 5 | 29 | 0.0446065 | 2737 GLI family zinc finger 3                                                       |
| GO metanephros development                           | 5 | 29 | 0.0446065 | 652 bone morphogenetic protein 4                                                    |
| GO protein targeting                                 | 5 | 29 | 0.0446065 | 22906 trafficking protein, kinesin binding 1                                        |
| GO protein targeting                                 | 5 | 29 | 0.0446065 | 23303 kinesin family member 13B                                                     |

|                                   |    |     |           |                                                                              |
|-----------------------------------|----|-----|-----------|------------------------------------------------------------------------------|
| GO protein targeting              | 5  | 29  | 0.0446065 | 5371 promyelocytic leukemia                                                  |
| GO protein targeting              | 5  | 29  | 0.0446065 | 5873 RAB27A, member RAS oncogene family                                      |
| GO protein targeting              | 5  | 29  | 0.0446065 | 9182 Ras association (RalGDS/AF-6) domain family (N-terminal) member 9       |
| GO in utero embryonic development | 15 | 136 | 0.045041  | 10568 solute carrier family 34 (sodium phosphate), member 2                  |
| GO in utero embryonic development | 15 | 136 | 0.045041  | 157506 retinol dehydrogenase 10 (all-trans)                                  |
| GO in utero embryonic development | 15 | 136 | 0.045041  | 1906 endothelin 1                                                            |
| GO in utero embryonic development | 15 | 136 | 0.045041  | 2296 forkhead box C1                                                         |
| GO in utero embryonic development | 15 | 136 | 0.045041  | 2707 gap junction protein, beta 3, 31kDa                                     |
| GO in utero embryonic development | 15 | 136 | 0.045041  | 2737 GLI family zinc finger 3                                                |
| GO in utero embryonic development | 15 | 136 | 0.045041  | 28982 feline leukemia virus subgroup C cellular receptor 1                   |
| GO in utero embryonic development | 15 | 136 | 0.045041  | 29123 ankyrin repeat domain 11                                               |
| GO in utero embryonic development | 15 | 136 | 0.045041  | 3726 jun B proto-oncogene                                                    |
| GO in utero embryonic development | 15 | 136 | 0.045041  | 4087 SMAD family member 2                                                    |
| GO in utero embryonic development | 15 | 136 | 0.045041  | 4851 Notch homolog 1, translocation-associated (Drosophila)                  |
| GO in utero embryonic development | 15 | 136 | 0.045041  | 5801 protein tyrosine phosphatase, receptor type, R                          |
| GO in utero embryonic development | 15 | 136 | 0.045041  | 8531 cold shock domain protein A                                             |
| GO in utero embryonic development | 15 | 136 | 0.045041  | 91 activin A receptor, type IB                                               |
| GO in utero embryonic development | 15 | 136 | 0.045041  | 94 activin A receptor type II-like 1                                         |
| GO Golgi membrane                 | 32 | 343 | 0.0456553 | 10090 uronyl-2-sulfotransferase                                              |
| GO Golgi membrane                 | 32 | 343 | 0.0456553 | 10282 blocked early in transport 1 homolog (S. cerevisiae)                   |
| GO Golgi membrane                 | 32 | 343 | 0.0456553 | 10317 UDP-Gal:betaGlcNAc beta 1,3-galactosyltransferase, polypeptide 5       |
| GO Golgi membrane                 | 32 | 343 | 0.0456553 | 127845 golgi transport 1 homolog A (S. cerevisiae)                           |
| GO Golgi membrane                 | 32 | 343 | 0.0456553 | 1571 cytochrome P450, family 2, subfamily E, polypeptide 1                   |
| GO Golgi membrane                 | 32 | 343 | 0.0456553 | 166929 sphingomyelin synthase 2                                              |
| GO Golgi membrane                 | 32 | 343 | 0.0456553 | 192134 UDP-GlcNAc:betaGal beta-1,3-N-acetylglucosaminyltransferase 6 (core   |
| GO Golgi membrane                 | 32 | 343 | 0.0456553 | 26035 glucuronic acid epimerase                                              |
| GO Golgi membrane                 | 32 | 343 | 0.0456553 | 2706 gap junction protein, beta 2, 26kDa                                     |
| GO Golgi membrane                 | 32 | 343 | 0.0456553 | 27090 ST6 (alpha-N-acetyl-neuraminyl-2,3-beta-galactosyl-1,3)-N-acetylgalact |
| GO Golgi membrane                 | 32 | 343 | 0.0456553 | 3601 interleukin 15 receptor, alpha                                          |
| GO Golgi membrane                 | 32 | 343 | 0.0456553 | 374378 UDP-N-acetyl-alpha-D-galactosamine:polypeptide N-acetylgalactosami    |
| GO Golgi membrane                 | 32 | 343 | 0.0456553 | 4121 mannosidase, alpha, class 1A, member 1                                  |
| GO Golgi membrane                 | 32 | 343 | 0.0456553 | 51272 blocked early in transport 1 homolog (S. cerevisiae)-like              |
| GO Golgi membrane                 | 32 | 343 | 0.0456553 | 51313 family with sequence similarity 198, member B                          |
| GO Golgi membrane                 | 32 | 343 | 0.0456553 | 5244 ATP-binding cassette, sub-family B (MDR/TAP), member 4                  |
| GO Golgi membrane                 | 32 | 343 | 0.0456553 | 53947 alpha 1,4-galactosyltransferase                                        |
| GO Golgi membrane                 | 32 | 343 | 0.0456553 | 54947 lysophosphatidylcholine acyltransferase 2                              |

|                          |    |      |           |                                                                              |
|--------------------------|----|------|-----------|------------------------------------------------------------------------------|
| GO Golgi membrane        | 32 | 343  | 0.0456553 | 55638 Golgi-localized protein                                                |
| GO Golgi membrane        | 32 | 343  | 0.0456553 | 55808 ST6 (alpha-N-acetyl-neuraminyl-2,3-beta-galactosyl-1,3)-N-acetylgalact |
| GO Golgi membrane        | 32 | 343  | 0.0456553 | 57134 mannosidase, alpha, class 1C, member 1                                 |
| GO Golgi membrane        | 32 | 343  | 0.0456553 | 5768 quiescin Q6 sulfhydryl oxidase 1                                        |
| GO Golgi membrane        | 32 | 343  | 0.0456553 | 6489 ST8 alpha-N-acetyl-neuraminide alpha-2,8-sialyltransferase 1            |
| GO Golgi membrane        | 32 | 343  | 0.0456553 | 682 basigin (Ok blood group)                                                 |
| GO Golgi membrane        | 32 | 343  | 0.0456553 | 79689 STEAP family member 4                                                  |
| GO Golgi membrane        | 32 | 343  | 0.0456553 | 79695 UDP-N-acetyl-alpha-D-galactosamine:polypeptide N-acetylgalactosami     |
| GO Golgi membrane        | 32 | 343  | 0.0456553 | 79971 wntless homolog (Drosophila)                                           |
| GO Golgi membrane        | 32 | 343  | 0.0456553 | 8509 N-deacetylase/N-sulfotransferase (heparan glucosaminyl) 2               |
| GO Golgi membrane        | 32 | 343  | 0.0456553 | 8706 beta-1,3-N-acetylgalactosaminyltransferase 1 (globoside blood group)    |
| GO Golgi membrane        | 32 | 343  | 0.0456553 | 89866 SEC16 homolog B (S. cerevisiae)                                        |
| GO Golgi membrane        | 32 | 343  | 0.0456553 | 9445 integral membrane protein 2B                                            |
| GO Golgi membrane        | 32 | 343  | 0.0456553 | 9619 ATP-binding cassette, sub-family G (WHITE), member 1                    |
| GO transport vesicle     | 6  | 39   | 0.0474143 | 5016 oviductal glycoprotein 1, 120kDa                                        |
| GO transport vesicle     | 6  | 39   | 0.0474143 | 5122 proprotein convertase subtilisin/kexin type 1                           |
| GO transport vesicle     | 6  | 39   | 0.0474143 | 5284 polymeric immunoglobulin receptor                                       |
| GO transport vesicle     | 6  | 39   | 0.0474143 | 6494 signal-induced proliferation-associated 1                               |
| GO transport vesicle     | 6  | 39   | 0.0474143 | 80763 chromosome 12 open reading frame 39                                    |
| GO transport vesicle     | 6  | 39   | 0.0474143 | 8082 sarcospan (Kras oncogene-associated gene)                               |
| GO calcium ion transport | 13 | 114  | 0.0474416 | 1139 cholinergic receptor, nicotinic, alpha 7                                |
| GO calcium ion transport | 13 | 114  | 0.0474416 | 3709 inositol 1,4,5-triphosphate receptor, type 2                            |
| GO calcium ion transport | 13 | 114  | 0.0474416 | 493 ATPase, Ca <sup>++</sup> transporting, plasma membrane 4                 |
| GO calcium ion transport | 13 | 114  | 0.0474416 | 53373 two pore segment channel 1                                             |
| GO calcium ion transport | 13 | 114  | 0.0474416 | 55799 calcium channel, voltage-dependent, alpha 2/delta subunit 3            |
| GO calcium ion transport | 13 | 114  | 0.0474416 | 56923 neuromedin U receptor 2                                                |
| GO calcium ion transport | 13 | 114  | 0.0474416 | 7223 transient receptor potential cation channel, subfamily C, member 4      |
| GO calcium ion transport | 13 | 114  | 0.0474416 | 774 calcium channel, voltage-dependent, N type, alpha 1B subunit             |
| GO calcium ion transport | 13 | 114  | 0.0474416 | 783 calcium channel, voltage-dependent, beta 2 subunit                       |
| GO calcium ion transport | 13 | 114  | 0.0474416 | 8911 calcium channel, voltage-dependent, T type, alpha 1I subunit            |
| GO calcium ion transport | 13 | 114  | 0.0474416 | 8912 calcium channel, voltage-dependent, T type, alpha 1H subunit            |
| GO calcium ion transport | 13 | 114  | 0.0474416 | 93589 calcium channel, voltage-dependent, alpha 2/delta subunit 4            |
| GO calcium ion transport | 13 | 114  | 0.0474416 | 9914 ATPase, Ca <sup>++</sup> transporting, type 2C, member 2                |
| GO receptor activity     | 93 | 1148 | 0.0476856 | 10076 protein tyrosine phosphatase, receptor type, U                         |
| GO receptor activity     | 93 | 1148 | 0.0476856 | 10268 receptor (G protein-coupled) activity modifying protein 3              |
| GO receptor activity     | 93 | 1148 | 0.0476856 | 10288 leukocyte immunoglobulin-like receptor, subfamily B (with TM and ITIN  |

|                      |    |      |           |                                                                            |
|----------------------|----|------|-----------|----------------------------------------------------------------------------|
| GO receptor activity | 93 | 1148 | 0.0476856 | 10507 sema domain, immunoglobulin domain (Ig), transmembrane domain (T     |
| GO receptor activity | 93 | 1148 | 0.0476856 | 10913 ectodysplasin A receptor                                             |
| GO receptor activity | 93 | 1148 | 0.0476856 | 115330 G protein-coupled receptor 146                                      |
| GO receptor activity | 93 | 1148 | 0.0476856 | 118429 anthrax toxin receptor 2                                            |
| GO receptor activity | 93 | 1148 | 0.0476856 | 121130 olfactory receptor, family 10, subfamily P, member 1                |
| GO receptor activity | 93 | 1148 | 0.0476856 | 130399 activin A receptor, type IC                                         |
| GO receptor activity | 93 | 1148 | 0.0476856 | 143503 olfactory receptor, family 51, subfamily E, member 1                |
| GO receptor activity | 93 | 1148 | 0.0476856 | 154 adrenergic, beta-2-, receptor, surface                                 |
| GO receptor activity | 93 | 1148 | 0.0476856 | 1803 dipeptidyl-peptidase 4                                                |
| GO receptor activity | 93 | 1148 | 0.0476856 | 1813 dopamine receptor D2                                                  |
| GO receptor activity | 93 | 1148 | 0.0476856 | 1815 dopamine receptor D4                                                  |
| GO receptor activity | 93 | 1148 | 0.0476856 | 1839 heparin-binding EGF-like growth factor                                |
| GO receptor activity | 93 | 1148 | 0.0476856 | 1901 sphingosine-1-phosphate receptor 1                                    |
| GO receptor activity | 93 | 1148 | 0.0476856 | 1902 lysophosphatidic acid receptor 1                                      |
| GO receptor activity | 93 | 1148 | 0.0476856 | 1969 EPH receptor A2                                                       |
| GO receptor activity | 93 | 1148 | 0.0476856 | 2044 EPH receptor A5                                                       |
| GO receptor activity | 93 | 1148 | 0.0476856 | 2066 v-erb-a erythroblastic leukemia viral oncogene homolog 4 (avian)      |
| GO receptor activity | 93 | 1148 | 0.0476856 | 2205 Fc fragment of IgE, high affinity I, receptor for; alpha polypeptide  |
| GO receptor activity | 93 | 1148 | 0.0476856 | 222545 G protein-coupled receptor, family C, group 6, member A             |
| GO receptor activity | 93 | 1148 | 0.0476856 | 223117 sema domain, immunoglobulin domain (Ig), short basic domain, secret |
| GO receptor activity | 93 | 1148 | 0.0476856 | 2263 fibroblast growth factor receptor 2                                   |
| GO receptor activity | 93 | 1148 | 0.0476856 | 22925 phospholipase A2 receptor 1, 180kDa                                  |
| GO receptor activity | 93 | 1148 | 0.0476856 | 23654 plexin B2                                                            |
| GO receptor activity | 93 | 1148 | 0.0476856 | 27202 G protein-coupled receptor 77                                        |
| GO receptor activity | 93 | 1148 | 0.0476856 | 27242 tumor necrosis factor receptor superfamily, member 21                |
| GO receptor activity | 93 | 1148 | 0.0476856 | 2861 G protein-coupled receptor 37 (endothelin receptor type B-like)       |
| GO receptor activity | 93 | 1148 | 0.0476856 | 286133 scavenger receptor class A, member 5 (putative)                     |
| GO receptor activity | 93 | 1148 | 0.0476856 | 2865 free fatty acid receptor 3                                            |
| GO receptor activity | 93 | 1148 | 0.0476856 | 2867 free fatty acid receptor 2                                            |
| GO receptor activity | 93 | 1148 | 0.0476856 | 28982 feline leukemia virus subgroup C cellular receptor 1                 |
| GO receptor activity | 93 | 1148 | 0.0476856 | 2911 glutamate receptor, metabotropic 1                                    |
| GO receptor activity | 93 | 1148 | 0.0476856 | 29126 CD274 molecule                                                       |
| GO receptor activity | 93 | 1148 | 0.0476856 | 3355 5-hydroxytryptamine (serotonin) receptor 1F                           |
| GO receptor activity | 93 | 1148 | 0.0476856 | 338557 G protein-coupled receptor 120                                      |
| GO receptor activity | 93 | 1148 | 0.0476856 | 353345 G protein-coupled receptor 141                                      |
| GO receptor activity | 93 | 1148 | 0.0476856 | 3561 interleukin 2 receptor, gamma (severe combined immunodeficiency)      |

|                      |    |      |           |                                                                         |
|----------------------|----|------|-----------|-------------------------------------------------------------------------|
| GO receptor activity | 93 | 1148 | 0.0476856 | 3570 interleukin 6 receptor                                             |
| GO receptor activity | 93 | 1148 | 0.0476856 | 3587 interleukin 10 receptor, alpha                                     |
| GO receptor activity | 93 | 1148 | 0.0476856 | 3601 interleukin 15 receptor, alpha                                     |
| GO receptor activity | 93 | 1148 | 0.0476856 | 3604 tumor necrosis factor receptor superfamily, member 9               |
| GO receptor activity | 93 | 1148 | 0.0476856 | 3643 insulin receptor                                                   |
| GO receptor activity | 93 | 1148 | 0.0476856 | 3678 integrin, alpha 5 (fibronectin receptor, alpha polypeptide)        |
| GO receptor activity | 93 | 1148 | 0.0476856 | 3687 integrin, alpha X (complement component 3 receptor 4 subunit)      |
| GO receptor activity | 93 | 1148 | 0.0476856 | 3689 integrin, beta 2 (complement component 3 receptor 3 and 4 subunit) |
| GO receptor activity | 93 | 1148 | 0.0476856 | 3691 integrin, beta 4                                                   |
| GO receptor activity | 93 | 1148 | 0.0476856 | 3696 integrin, beta 8                                                   |
| GO receptor activity | 93 | 1148 | 0.0476856 | 3815 v-kit Hardy-Zuckerman 4 feline sarcoma viral oncogene homolog      |
| GO receptor activity | 93 | 1148 | 0.0476856 | 387509 G protein-coupled receptor 153                                   |
| GO receptor activity | 93 | 1148 | 0.0476856 | 388633 low density lipoprotein receptor class A domain containing 1     |
| GO receptor activity | 93 | 1148 | 0.0476856 | 3911 laminin, alpha 5                                                   |
| GO receptor activity | 93 | 1148 | 0.0476856 | 392392 olfactory receptor, family 1, subfamily K, member 1              |
| GO receptor activity | 93 | 1148 | 0.0476856 | 4038 low density lipoprotein receptor-related protein 4                 |
| GO receptor activity | 93 | 1148 | 0.0476856 | 4065 lymphocyte antigen 75                                              |
| GO receptor activity | 93 | 1148 | 0.0476856 | 4163 mutated in colorectal cancers                                      |
| GO receptor activity | 93 | 1148 | 0.0476856 | 4179 CD46 molecule, complement regulatory protein                       |
| GO receptor activity | 93 | 1148 | 0.0476856 | 4306 nuclear receptor subfamily 3, group C, member 2                    |
| GO receptor activity | 93 | 1148 | 0.0476856 | 4486 macrophage stimulating 1 receptor (c-met-related tyrosine kinase)  |
| GO receptor activity | 93 | 1148 | 0.0476856 | 4851 Notch homolog 1, translocation-associated (Drosophila)             |
| GO receptor activity | 93 | 1148 | 0.0476856 | 4853 Notch homolog 2 (Drosophila)                                       |
| GO receptor activity | 93 | 1148 | 0.0476856 | 4886 neuropeptide Y receptor Y1                                         |
| GO receptor activity | 93 | 1148 | 0.0476856 | 4889 neuropeptide Y receptor Y5                                         |
| GO receptor activity | 93 | 1148 | 0.0476856 | 5025 purinergic receptor P2X, ligand-gated ion channel, 4               |
| GO receptor activity | 93 | 1148 | 0.0476856 | 5362 plexin A2                                                          |
| GO receptor activity | 93 | 1148 | 0.0476856 | 54852 progesterin and adipoQ receptor family member V                   |
| GO receptor activity | 93 | 1148 | 0.0476856 | 56923 neuromedin U receptor 2                                           |
| GO receptor activity | 93 | 1148 | 0.0476856 | 5724 platelet-activating factor receptor                                |
| GO receptor activity | 93 | 1148 | 0.0476856 | 5732 prostaglandin E receptor 2 (subtype EP2), 53kDa                    |
| GO receptor activity | 93 | 1148 | 0.0476856 | 5734 prostaglandin E receptor 4 (subtype EP4)                           |
| GO receptor activity | 93 | 1148 | 0.0476856 | 5737 prostaglandin F receptor (FP)                                      |
| GO receptor activity | 93 | 1148 | 0.0476856 | 57512 G protein-coupled receptor 158                                    |
| GO receptor activity | 93 | 1148 | 0.0476856 | 5789 protein tyrosine phosphatase, receptor type, D                     |
| GO receptor activity | 93 | 1148 | 0.0476856 | 5799 protein tyrosine phosphatase, receptor type, N polypeptide 2       |

|                                           |    |      |           |                                                                             |
|-------------------------------------------|----|------|-----------|-----------------------------------------------------------------------------|
| GO receptor activity                      | 93 | 1148 | 0.0476856 | 5801 protein tyrosine phosphatase, receptor type, R                         |
| GO receptor activity                      | 93 | 1148 | 0.0476856 | 6238 ribosome binding protein 1 homolog 180kDa (dog)                        |
| GO receptor activity                      | 93 | 1148 | 0.0476856 | 6751 somatostatin receptor 1                                                |
| GO receptor activity                      | 93 | 1148 | 0.0476856 | 7097 toll-like receptor 2                                                   |
| GO receptor activity                      | 93 | 1148 | 0.0476856 | 7098 toll-like receptor 3                                                   |
| GO receptor activity                      | 93 | 1148 | 0.0476856 | 7099 toll-like receptor 4                                                   |
| GO receptor activity                      | 93 | 1148 | 0.0476856 | 7133 tumor necrosis factor receptor superfamily, member 1B                  |
| GO receptor activity                      | 93 | 1148 | 0.0476856 | 7869 sema domain, immunoglobulin domain (Ig), short basic domain, secret    |
| GO receptor activity                      | 93 | 1148 | 0.0476856 | 79098 chromosome 1 open reading frame 116                                   |
| GO receptor activity                      | 93 | 1148 | 0.0476856 | 79957 progesterin and adipoQ receptor family member VI                      |
| GO receptor activity                      | 93 | 1148 | 0.0476856 | 81285 olfactory receptor, family 51, subfamily E, member 2                  |
| GO receptor activity                      | 93 | 1148 | 0.0476856 | 81470 olfactory receptor, family 2, subfamily G, member 2                   |
| GO receptor activity                      | 93 | 1148 | 0.0476856 | 83661 membrane-spanning 4-domains, subfamily A, member 8B                   |
| GO receptor activity                      | 93 | 1148 | 0.0476856 | 8600 tumor necrosis factor (ligand) superfamily, member 11                  |
| GO receptor activity                      | 93 | 1148 | 0.0476856 | 8973 cholinergic receptor, nicotinic, alpha 6                               |
| GO receptor activity                      | 93 | 1148 | 0.0476856 | 91 activin A receptor, type IB                                              |
| GO receptor activity                      | 93 | 1148 | 0.0476856 | 94 activin A receptor type II-like 1                                        |
| GO receptor activity                      | 93 | 1148 | 0.0476856 | 952 CD38 molecule                                                           |
| GO elevation of cytosolic calcium ion con | 11 | 92   | 0.0488474 | 1604 CD55 molecule, decay accelerating factor for complement (Cromer blo    |
| GO elevation of cytosolic calcium ion con | 11 | 92   | 0.0488474 | 1902 lysophosphatidic acid receptor 1                                       |
| GO elevation of cytosolic calcium ion con | 11 | 92   | 0.0488474 | 1906 endothelin 1                                                           |
| GO elevation of cytosolic calcium ion con | 11 | 92   | 0.0488474 | 2769 guanine nucleotide binding protein (G protein), alpha 15 (Gq class)    |
| GO elevation of cytosolic calcium ion con | 11 | 92   | 0.0488474 | 3827 kininogen 1                                                            |
| GO elevation of cytosolic calcium ion con | 11 | 92   | 0.0488474 | 5367 pro-melanin-concentrating hormone                                      |
| GO elevation of cytosolic calcium ion con | 11 | 92   | 0.0488474 | 56477 chemokine (C-C motif) ligand 28                                       |
| GO elevation of cytosolic calcium ion con | 11 | 92   | 0.0488474 | 56923 neuromedin U receptor 2                                               |
| GO elevation of cytosolic calcium ion con | 11 | 92   | 0.0488474 | 7852 chemokine (C-X-C motif) receptor 4                                     |
| GO elevation of cytosolic calcium ion con | 11 | 92   | 0.0488474 | 799 calcitonin receptor                                                     |
| GO elevation of cytosolic calcium ion con | 11 | 92   | 0.0488474 | 952 CD38 molecule                                                           |
| GO brain development                      | 13 | 115  | 0.0502916 | 1152 creatine kinase, brain                                                 |
| GO brain development                      | 13 | 115  | 0.0502916 | 127343 diencephalon/mesencephalon homeobox 1                                |
| GO brain development                      | 13 | 115  | 0.0502916 | 1959 early growth response 2                                                |
| GO brain development                      | 13 | 115  | 0.0502916 | 22859 latrophilin 1                                                         |
| GO brain development                      | 13 | 115  | 0.0502916 | 2290 forkhead box G1                                                        |
| GO brain development                      | 13 | 115  | 0.0502916 | 2296 forkhead box C1                                                        |
| GO brain development                      | 13 | 115  | 0.0502916 | 3400 inhibitor of DNA binding 4, dominant negative helix-loop-helix protein |



|                                           |    |     |           |                                                                     |
|-------------------------------------------|----|-----|-----------|---------------------------------------------------------------------|
| GO brain development                      | 13 | 115 | 0.0502916 | 5463 POU class 6 homeobox 1                                         |
| GO brain development                      | 13 | 115 | 0.0502916 | 57453 Down syndrome cell adhesion molecule like 1                   |
| GO brain development                      | 13 | 115 | 0.0502916 | 6096 RAR-related orphan receptor B                                  |
| GO brain development                      | 13 | 115 | 0.0502916 | 7170 tropomyosin 3                                                  |
| GO brain development                      | 13 | 115 | 0.0502916 | 7546 Zic family member 2 (odd-paired homolog, Drosophila)           |
| GO brain development                      | 13 | 115 | 0.0502916 | 8660 insulin receptor substrate 2                                   |
| GO negative regulation of gene-specific t | 8  | 60  | 0.0505689 | 10014 histone deacetylase 5                                         |
| GO negative regulation of gene-specific t | 8  | 60  | 0.0505689 | 4784 nuclear factor I/X (CCAAT-binding transcription factor)        |
| GO negative regulation of gene-specific t | 8  | 60  | 0.0505689 | 5187 period homolog 1 (Drosophila)                                  |
| GO negative regulation of gene-specific t | 8  | 60  | 0.0505689 | 5465 peroxisome proliferator-activated receptor alpha               |
| GO negative regulation of gene-specific t | 8  | 60  | 0.0505689 | 6256 retinoid X receptor, alpha                                     |
| GO negative regulation of gene-specific t | 8  | 60  | 0.0505689 | 652 bone morphogenetic protein 4                                    |
| GO negative regulation of gene-specific t | 8  | 60  | 0.0505689 | 8864 period homolog 2 (Drosophila)                                  |
| GO negative regulation of gene-specific t | 8  | 60  | 0.0505689 | 9734 histone deacetylase 9                                          |
| GO adult locomotory behavior              | 5  | 30  | 0.0506306 | 127343 diencephalon/mesencephalon homeobox 1                        |
| GO adult locomotory behavior              | 5  | 30  | 0.0506306 | 1815 dopamine receptor D4                                           |
| GO adult locomotory behavior              | 5  | 30  | 0.0506306 | 4929 nuclear receptor subfamily 4, group A, member 2                |
| GO adult locomotory behavior              | 5  | 30  | 0.0506306 | 5071 Parkinson disease (autosomal recessive, juvenile) 2, parkin    |
| GO adult locomotory behavior              | 5  | 30  | 0.0506306 | 6622 synuclein, alpha (non A4 component of amyloid precursor)       |
| GO dorsal/ventral pattern formation       | 5  | 30  | 0.0506306 | 1906 endothelin 1                                                   |
| GO dorsal/ventral pattern formation       | 5  | 30  | 0.0506306 | 2290 forkhead box G1                                                |
| GO dorsal/ventral pattern formation       | 5  | 30  | 0.0506306 | 57453 Down syndrome cell adhesion molecule like 1                   |
| GO dorsal/ventral pattern formation       | 5  | 30  | 0.0506306 | 84976 dispatched homolog 1 (Drosophila)                             |
| GO dorsal/ventral pattern formation       | 5  | 30  | 0.0506306 | 8646 chordin                                                        |
| GO positive regulation of inflammatory r  | 4  | 21  | 0.0511354 | 183 angiotensinogen (serpin peptidase inhibitor, clade A, member 8) |
| GO positive regulation of inflammatory r  | 4  | 21  | 0.0511354 | 7097 toll-like receptor 2                                           |
| GO positive regulation of inflammatory r  | 4  | 21  | 0.0511354 | 7098 toll-like receptor 3                                           |
| GO positive regulation of inflammatory r  | 4  | 21  | 0.0511354 | 7099 toll-like receptor 4                                           |
| GO ventricular cardiac muscle tissue mor  | 4  | 21  | 0.0511354 | 2296 forkhead box C1                                                |
| GO ventricular cardiac muscle tissue mor  | 4  | 21  | 0.0511354 | 2303 forkhead box C2 (MFH-1, mesenchyme forkhead 1)                 |
| GO ventricular cardiac muscle tissue mor  | 4  | 21  | 0.0511354 | 6256 retinoid X receptor, alpha                                     |
| GO ventricular cardiac muscle tissue mor  | 4  | 21  | 0.0511354 | 7049 transforming growth factor, beta receptor III                  |
| GO negative regulation of gene-specific t | 4  | 21  | 0.0511354 | 429 achaete-scute complex homolog 1 (Drosophila)                    |
| GO negative regulation of gene-specific t | 4  | 21  | 0.0511354 | 4851 Notch homolog 1, translocation-associated (Drosophila)         |
| GO negative regulation of gene-specific t | 4  | 21  | 0.0511354 | 652 bone morphogenetic protein 4                                    |
| GO negative regulation of gene-specific t | 4  | 21  | 0.0511354 | 7026 nuclear receptor subfamily 2, group F, member 2                |

|                |    |     |           |        |                                                                          |
|----------------|----|-----|-----------|--------|--------------------------------------------------------------------------|
| GO proteolysis | 38 | 423 | 0.0513137 | 10942  | protease, serine, 21 (testisin)                                          |
| GO proteolysis | 38 | 423 | 0.0513137 | 11202  | kallikrein-related peptidase 8                                           |
| GO proteolysis | 38 | 423 | 0.0513137 | 1363   | carboxypeptidase E                                                       |
| GO proteolysis | 38 | 423 | 0.0513137 | 1368   | carboxypeptidase M                                                       |
| GO proteolysis | 38 | 423 | 0.0513137 | 1508   | cathepsin B                                                              |
| GO proteolysis | 38 | 423 | 0.0513137 | 1519   | cathepsin O                                                              |
| GO proteolysis | 38 | 423 | 0.0513137 | 170692 | ADAM metallopeptidase with thrombospondin type 1 motif, 18               |
| GO proteolysis | 38 | 423 | 0.0513137 | 1803   | dipeptidyl-peptidase 4                                                   |
| GO proteolysis | 38 | 423 | 0.0513137 | 255738 | proprotein convertase subtilisin/kexin type 9                            |
| GO proteolysis | 38 | 423 | 0.0513137 | 25825  | beta-site APP-cleaving enzyme 2                                          |
| GO proteolysis | 38 | 423 | 0.0513137 | 26232  | F-box protein 2                                                          |
| GO proteolysis | 38 | 423 | 0.0513137 | 26270  | F-box protein 6                                                          |
| GO proteolysis | 38 | 423 | 0.0513137 | 29108  | PYD and CARD domain containing                                           |
| GO proteolysis | 38 | 423 | 0.0513137 | 388743 | calpain 8                                                                |
| GO proteolysis | 38 | 423 | 0.0513137 | 4316   | matrix metallopeptidase 7 (matrilysin, uterine)                          |
| GO proteolysis | 38 | 423 | 0.0513137 | 5046   | proprotein convertase subtilisin/kexin type 6                            |
| GO proteolysis | 38 | 423 | 0.0513137 | 5122   | proprotein convertase subtilisin/kexin type 1                            |
| GO proteolysis | 38 | 423 | 0.0513137 | 51279  | complement component 1, r subcomponent-like                              |
| GO proteolysis | 38 | 423 | 0.0513137 | 5327   | plasminogen activator, tissue                                            |
| GO proteolysis | 38 | 423 | 0.0513137 | 54504  | carboxypeptidase, vitellogenic-like                                      |
| GO proteolysis | 38 | 423 | 0.0513137 | 5648   | mannan-binding lectin serine peptidase 1 (C4/C2 activating component     |
| GO proteolysis | 38 | 423 | 0.0513137 | 56547  | matrix metallopeptidase 26                                               |
| GO proteolysis | 38 | 423 | 0.0513137 | 5655   | kallikrein-related peptidase 10                                          |
| GO proteolysis | 38 | 423 | 0.0513137 | 56649  | transmembrane protease, serine 4                                         |
| GO proteolysis | 38 | 423 | 0.0513137 | 57094  | carboxypeptidase A6                                                      |
| GO proteolysis | 38 | 423 | 0.0513137 | 5972   | renin                                                                    |
| GO proteolysis | 38 | 423 | 0.0513137 | 629    | complement factor B                                                      |
| GO proteolysis | 38 | 423 | 0.0513137 | 64699  | transmembrane protease, serine 3                                         |
| GO proteolysis | 38 | 423 | 0.0513137 | 7092   | tolloid-like 1                                                           |
| GO proteolysis | 38 | 423 | 0.0513137 | 715    | complement component 1, r subcomponent                                   |
| GO proteolysis | 38 | 423 | 0.0513137 | 717    | complement component 2                                                   |
| GO proteolysis | 38 | 423 | 0.0513137 | 726    | calpain 5                                                                |
| GO proteolysis | 38 | 423 | 0.0513137 | 79956  | endoplasmic reticulum metallopeptidase 1                                 |
| GO proteolysis | 38 | 423 | 0.0513137 | 834    | caspase 1, apoptosis-related cysteine peptidase (interleukin 1, beta, co |
| GO proteolysis | 38 | 423 | 0.0513137 | 837    | caspase 4, apoptosis-related cysteine peptidase                          |
| GO proteolysis | 38 | 423 | 0.0513137 | 8722   | cathepsin F                                                              |

|                                                            |    |     |           |                                                                                        |
|------------------------------------------------------------|----|-----|-----------|----------------------------------------------------------------------------------------|
| GO proteolysis                                             | 38 | 423 | 0.0513137 | 8751 ADAM metallopeptidase domain 15                                                   |
| GO proteolysis                                             | 38 | 423 | 0.0513137 | 9510 ADAM metallopeptidase with thrombospondin type 1 motif, 1                         |
| GO response to hydrogen peroxide                           | 6  | 40  | 0.0526898 | 10628 thioredoxin interacting protein                                                  |
| GO response to hydrogen peroxide                           | 6  | 40  | 0.0526898 | 1843 dual specificity phosphatase 1                                                    |
| GO response to hydrogen peroxide                           | 6  | 40  | 0.0526898 | 2066 v-erb-a erythroblastic leukemia viral oncogene homolog 4 (avian)                  |
| GO response to hydrogen peroxide                           | 6  | 40  | 0.0526898 | 3725 jun oncogene                                                                      |
| GO response to hydrogen peroxide                           | 6  | 40  | 0.0526898 | 4151 myoglobin                                                                         |
| GO response to hydrogen peroxide                           | 6  | 40  | 0.0526898 | 84919 protein phosphatase 1, regulatory (inhibitor) subunit 15B                        |
| GO negative regulation of smooth muscle cell proliferation | 3  | 13  | 0.0543804 | 10221 tribbles homolog 1 (Drosophila)                                                  |
| GO negative regulation of smooth muscle cell proliferation | 3  | 13  | 0.0543804 | 3486 insulin-like growth factor binding protein 3                                      |
| GO negative regulation of smooth muscle cell proliferation | 3  | 13  | 0.0543804 | 3488 insulin-like growth factor binding protein 5                                      |
| GO hormone metabolic process                               | 3  | 13  | 0.0543804 | 183 angiotensinogen (serpin peptidase inhibitor, clade A, member 8)                    |
| GO hormone metabolic process                               | 3  | 13  | 0.0543804 | 3169 forkhead box A1                                                                   |
| GO hormone metabolic process                               | 3  | 13  | 0.0543804 | 54361 wingless-type MMTV integration site family, member 4                             |
| GO MAP kinase tyrosine/serine/threonine kinase activity    | 3  | 13  | 0.0543804 | 1843 dual specificity phosphatase 1                                                    |
| GO MAP kinase tyrosine/serine/threonine kinase activity    | 3  | 13  | 0.0543804 | 1844 dual specificity phosphatase 2                                                    |
| GO MAP kinase tyrosine/serine/threonine kinase activity    | 3  | 13  | 0.0543804 | 1847 dual specificity phosphatase 5                                                    |
| GO regulation of inflammatory response                     | 3  | 13  | 0.0543804 | 22904 strawberry notch homolog 2 (Drosophila)                                          |
| GO regulation of inflammatory response                     | 3  | 13  | 0.0543804 | 50604 interleukin 20                                                                   |
| GO regulation of inflammatory response                     | 3  | 13  | 0.0543804 | 604 B-cell CLL/lymphoma 6                                                              |
| GO negative regulation of Wnt receptor signaling pathway   | 3  | 13  | 0.0543804 | 2737 GLI family zinc finger 3                                                          |
| GO negative regulation of Wnt receptor signaling pathway   | 3  | 13  | 0.0543804 | 4163 mutated in colorectal cancers                                                     |
| GO negative regulation of Wnt receptor signaling pathway   | 3  | 13  | 0.0543804 | 7474 wingless-type MMTV integration site family, member 5A                             |
| GO embryonic cranial skeleton morphogenesis                | 3  | 13  | 0.0543804 | 4087 SMAD family member 2                                                              |
| GO embryonic cranial skeleton morphogenesis                | 3  | 13  | 0.0543804 | 5396 paired related homeobox 1                                                         |
| GO embryonic cranial skeleton morphogenesis                | 3  | 13  | 0.0543804 | 652 bone morphogenetic protein 4                                                       |
| GO inorganic anion exchanger activity                      | 3  | 13  | 0.0543804 | 55867 solute carrier family 22 (organic anion/urate transporter), member 11            |
| GO inorganic anion exchanger activity                      | 3  | 13  | 0.0543804 | 6521 solute carrier family 4, anion exchanger, member 1 (erythrocyte membrane protein) |
| GO inorganic anion exchanger activity                      | 3  | 13  | 0.0543804 | 8671 solute carrier family 4, sodium bicarbonate cotransporter, member 4               |
| GO activation of NF-kappaB-inducing kinase activity        | 3  | 13  | 0.0543804 | 7098 toll-like receptor 3                                                              |
| GO activation of NF-kappaB-inducing kinase activity        | 3  | 13  | 0.0543804 | 79092 caspase recruitment domain family, member 14                                     |
| GO activation of NF-kappaB-inducing kinase activity        | 3  | 13  | 0.0543804 | 9966 tumor necrosis factor (ligand) superfamily, member 15                             |
| GO intracellular protein kinase cascade                    | 11 | 94  | 0.0555645 | 150094 salt-inducible kinase 1                                                         |
| GO intracellular protein kinase cascade                    | 11 | 94  | 0.0555645 | 1612 death-associated protein kinase 1                                                 |
| GO intracellular protein kinase cascade                    | 11 | 94  | 0.0555645 | 1813 dopamine receptor D2                                                              |
| GO intracellular protein kinase cascade                    | 11 | 94  | 0.0555645 | 1906 endothelin 1                                                                      |

|                                            |    |    |           |                                                                                |
|--------------------------------------------|----|----|-----------|--------------------------------------------------------------------------------|
| GO intracellular protein kinase cascade    | 11 | 94 | 0.0555645 | 23043 TRAF2 and NCK interacting kinase                                         |
| GO intracellular protein kinase cascade    | 11 | 94 | 0.0555645 | 23604 death-associated protein kinase 2                                        |
| GO intracellular protein kinase cascade    | 11 | 94 | 0.0555645 | 3815 v-kit Hardy-Zuckerman 4 feline sarcoma viral oncogene homolog             |
| GO intracellular protein kinase cascade    | 11 | 94 | 0.0555645 | 51085 MLX interacting protein-like                                             |
| GO intracellular protein kinase cascade    | 11 | 94 | 0.0555645 | 7049 transforming growth factor, beta receptor III                             |
| GO intracellular protein kinase cascade    | 11 | 94 | 0.0555645 | 7538 zinc finger protein 36, C3H type, homolog (mouse)                         |
| GO intracellular protein kinase cascade    | 11 | 94 | 0.0555645 | 9263 serine/threonine kinase 17a                                               |
| GO embryonic development                   | 9  | 72 | 0.0559856 | 1999 E74-like factor 3 (ets domain transcription factor, epithelial-specific ) |
| GO embryonic development                   | 9  | 72 | 0.0559856 | 3911 laminin, alpha 5                                                          |
| GO embryonic development                   | 9  | 72 | 0.0559856 | 4851 Notch homolog 1, translocation-associated (Drosophila)                    |
| GO embryonic development                   | 9  | 72 | 0.0559856 | 498 ATP synthase, H+ transporting, mitochondrial F1 complex, alpha subun       |
| GO embryonic development                   | 9  | 72 | 0.0559856 | 5122 proprotein convertase subtilisin/kexin type 1                             |
| GO embryonic development                   | 9  | 72 | 0.0559856 | 5950 retinol binding protein 4, plasma                                         |
| GO embryonic development                   | 9  | 72 | 0.0559856 | 7474 wingless-type MMTV integration site family, member 5A                     |
| GO embryonic development                   | 9  | 72 | 0.0559856 | 8796 sciellin                                                                  |
| GO embryonic development                   | 9  | 72 | 0.0559856 | 91 activin A receptor, type IB                                                 |
| GO positive regulation of MAPKKK casc      | 5  | 31 | 0.0571075 | 154 adrenergic, beta-2-, receptor, surface                                     |
| GO positive regulation of MAPKKK casc      | 5  | 31 | 0.0571075 | 183 angiotensinogen (serpin peptidase inhibitor, clade A, member 8)            |
| GO positive regulation of MAPKKK casc      | 5  | 31 | 0.0571075 | 3569 interleukin 6 (interferon, beta 2)                                        |
| GO positive regulation of MAPKKK casc      | 5  | 31 | 0.0571075 | 3570 interleukin 6 receptor                                                    |
| GO positive regulation of MAPKKK casc      | 5  | 31 | 0.0571075 | 3643 insulin receptor                                                          |
| GO heart morphogenesis                     | 5  | 31 | 0.0571075 | 2296 forkhead box C1                                                           |
| GO heart morphogenesis                     | 5  | 31 | 0.0571075 | 2303 forkhead box C2 (MFH-1, mesenchyme forkhead 1)                            |
| GO heart morphogenesis                     | 5  | 31 | 0.0571075 | 3643 insulin receptor                                                          |
| GO heart morphogenesis                     | 5  | 31 | 0.0571075 | 6604 SWI/SNF related, matrix associated, actin dependent regulator of chrom    |
| GO heart morphogenesis                     | 5  | 31 | 0.0571075 | 7049 transforming growth factor, beta receptor III                             |
| GO negative regulation of Ras protein sig  | 2  | 6  | 0.0582206 | 10252 sprouty homolog 1, antagonist of FGF signaling (Drosophila)              |
| GO negative regulation of Ras protein sig  | 2  | 6  | 0.0582206 | 10253 sprouty homolog 2 (Drosophila)                                           |
| GO prostate epithelial cord arborization i | 2  | 6  | 0.0582206 | 10481 homeobox B13                                                             |
| GO prostate epithelial cord arborization i | 2  | 6  | 0.0582206 | 3479 insulin-like growth factor 1 (somatomedin C)                              |
| GO negative regulation of interleukin-12   | 2  | 6  | 0.0582206 | 11213 interleukin-1 receptor-associated kinase 3                               |
| GO negative regulation of interleukin-12   | 2  | 6  | 0.0582206 | 64127 nucleotide-binding oligomerization domain containing 2                   |
| GO response to amine stimulus              | 2  | 6  | 0.0582206 | 1373 carbamoyl-phosphate synthetase 1, mitochondrial                           |
| GO response to amine stimulus              | 2  | 6  | 0.0582206 | 1508 cathepsin B                                                               |
| GO negative regulation of protein secreti  | 2  | 6  | 0.0582206 | 1813 dopamine receptor D2                                                      |
| GO negative regulation of protein secreti  | 2  | 6  | 0.0582206 | 1815 dopamine receptor D4                                                      |

|                                            |   |   |           |                                                                               |
|--------------------------------------------|---|---|-----------|-------------------------------------------------------------------------------|
| GO peristalsis                             | 2 | 6 | 0.0582206 | 1813 dopamine receptor D2                                                     |
| GO peristalsis                             | 2 | 6 | 0.0582206 | 183 angiotensinogen (serpin peptidase inhibitor, clade A, member 8)           |
| GO regulation of synaptic transmission, C  | 2 | 6 | 0.0582206 | 1813 dopamine receptor D2                                                     |
| GO regulation of synaptic transmission, C  | 2 | 6 | 0.0582206 | 3845 v-Ki-ras2 Kirsten rat sarcoma viral oncogene homolog                     |
| GO regulation of dopamine metabolic pr     | 2 | 6 | 0.0582206 | 1815 dopamine receptor D4                                                     |
| GO regulation of dopamine metabolic pr     | 2 | 6 | 0.0582206 | 4929 nuclear receptor subfamily 4, group A, member 2                          |
| GO positive regulation of fatty acid biosy | 2 | 6 | 0.0582206 | 183 angiotensinogen (serpin peptidase inhibitor, clade A, member 8)           |
| GO positive regulation of fatty acid biosy | 2 | 6 | 0.0582206 | 51085 MLX interacting protein-like                                            |
| GO inositol phosphate-mediated signalin    | 2 | 6 | 0.0582206 | 1906 endothelin 1                                                             |
| GO inositol phosphate-mediated signalin    | 2 | 6 | 0.0582206 | 56923 neuromedin U receptor 2                                                 |
| GO mitochondrial membrane organizatic      | 2 | 6 | 0.0582206 | 2055 ceroid-lipofuscinosis, neuronal 8 (epilepsy, progressive with mental ret |
| GO mitochondrial membrane organizatic      | 2 | 6 | 0.0582206 | 6622 synuclein, alpha (non A4 component of amyloid precursor)                 |
| GO positive regulation of mast cell degra  | 2 | 6 | 0.0582206 | 2205 Fc fragment of IgE, high affinity I, receptor for; alpha polypeptide     |
| GO positive regulation of mast cell degra  | 2 | 6 | 0.0582206 | 6850 spleen tyrosine kinase                                                   |
| GO leukotriene metabolic process           | 2 | 6 | 0.0582206 | 240 arachidonate 5-lipoxygenase                                               |
| GO leukotriene metabolic process           | 2 | 6 | 0.0582206 | 4056 leukotriene C4 synthase                                                  |
| GO lipoxygenase activity                   | 2 | 6 | 0.0582206 | 240 arachidonate 5-lipoxygenase                                               |
| GO lipoxygenase activity                   | 2 | 6 | 0.0582206 | 59344 arachidonate lipoxygenase 3                                             |
| GO glycosaminoglycan catabolic process     | 2 | 6 | 0.0582206 | 2517 fucosidase, alpha-L- 1, tissue                                           |
| GO glycosaminoglycan catabolic process     | 2 | 6 | 0.0582206 | 2990 glucuronidase, beta                                                      |
| GO heparan sulfate proteoglycan biosynt    | 2 | 6 | 0.0582206 | 26035 glucuronic acid epimerase                                               |
| GO heparan sulfate proteoglycan biosynt    | 2 | 6 | 0.0582206 | 8509 N-deacetylase/N-sulfotransferase (heparan glucosaminyl) 2                |
| GO neuron fate specification               | 2 | 6 | 0.0582206 | 3169 forkhead box A1                                                          |
| GO neuron fate specification               | 2 | 6 | 0.0582206 | 429 achaete-scute complex homolog 1 (Drosophila)                              |
| GO exocrine pancreas development           | 2 | 6 | 0.0582206 | 3479 insulin-like growth factor 1 (somatomedin C)                             |
| GO exocrine pancreas development           | 2 | 6 | 0.0582206 | 3643 insulin receptor                                                         |
| GO positive regulation of myoblast differ  | 2 | 6 | 0.0582206 | 3486 insulin-like growth factor binding protein 3                             |
| GO positive regulation of myoblast differ  | 2 | 6 | 0.0582206 | 91653 Boc homolog (mouse)                                                     |
| GO interleukin-6 receptor binding          | 2 | 6 | 0.0582206 | 3569 interleukin 6 (interferon, beta 2)                                       |
| GO interleukin-6 receptor binding          | 2 | 6 | 0.0582206 | 3570 interleukin 6 receptor                                                   |
| GO positive regulation of acute inflamma   | 2 | 6 | 0.0582206 | 3569 interleukin 6 (interferon, beta 2)                                       |
| GO positive regulation of acute inflamma   | 2 | 6 | 0.0582206 | 4889 neuropeptide Y receptor Y5                                               |
| GO water transmembrane transporter ac      | 2 | 6 | 0.0582206 | 358 aquaporin 1 (Colton blood group)                                          |
| GO water transmembrane transporter ac      | 2 | 6 | 0.0582206 | 6563 solute carrier family 14 (urea transporter), member 1 (Kidd blood group) |
| GO SMAD protein nuclear translocation      | 2 | 6 | 0.0582206 | 3725 jun oncogene                                                             |
| GO SMAD protein nuclear translocation      | 2 | 6 | 0.0582206 | 5371 promyelocytic leukemia                                                   |

|                                           |   |    |           |                                                                               |
|-------------------------------------------|---|----|-----------|-------------------------------------------------------------------------------|
| GO somatic stem cell division             | 2 | 6  | 0.0582206 | 3815 v-kit Hardy-Zuckerman 4 feline sarcoma viral oncogene homolog            |
| GO somatic stem cell division             | 2 | 6  | 0.0582206 | 4851 Notch homolog 1, translocation-associated (Drosophila)                   |
| GO negative regulation of erythrocyte dif | 2 | 6  | 0.0582206 | 4005 LIM domain only 2 (rhombotin-like 1)                                     |
| GO negative regulation of erythrocyte dif | 2 | 6  | 0.0582206 | 9935 v-maf musculoaponeurotic fibrosarcoma oncogene homolog B (avian)         |
| GO maintenance of gastrointestinal epith  | 2 | 6  | 0.0582206 | 4588 mucin 6, oligomeric mucus/gel-forming                                    |
| GO maintenance of gastrointestinal epith  | 2 | 6  | 0.0582206 | 5950 retinol binding protein 4, plasma                                        |
| GO dopamine biosynthetic process          | 2 | 6  | 0.0582206 | 4929 nuclear receptor subfamily 4, group A, member 2                          |
| GO dopamine biosynthetic process          | 2 | 6  | 0.0582206 | 6622 synuclein, alpha (non A4 component of amyloid precursor)                 |
| GO negative regulation of cholesterol stc | 2 | 6  | 0.0582206 | 5465 peroxisome proliferator-activated receptor alpha                         |
| GO negative regulation of cholesterol stc | 2 | 6  | 0.0582206 | 9619 ATP-binding cassette, sub-family G (WHITE), member 1                     |
| GO protein thiol-disulfide exchange       | 2 | 6  | 0.0582206 | 56605 ERO1-like beta ( <i>S. cerevisiae</i> )                                 |
| GO protein thiol-disulfide exchange       | 2 | 6  | 0.0582206 | 5768 quiescin Q6 sulfhydryl oxidase 1                                         |
| GO regulation of branching involved in pi | 2 | 6  | 0.0582206 | 6256 retinoid X receptor, alpha                                               |
| GO regulation of branching involved in pi | 2 | 6  | 0.0582206 | 652 bone morphogenetic protein 4                                              |
| GO branching involved in embryonic plac   | 2 | 6  | 0.0582206 | 6692 serine peptidase inhibitor, Kunitz type 1                                |
| GO branching involved in embryonic plac   | 2 | 6  | 0.0582206 | 9021 suppressor of cytokine signaling 3                                       |
| GO cobalt ion transport                   | 2 | 6  | 0.0582206 | 6947 transcobalamin I (vitamin B12 binding protein, R binder family)          |
| GO cobalt ion transport                   | 2 | 6  | 0.0582206 | 6948 transcobalamin II; macrocytic anemia                                     |
| GO Rho GTPase activator activity          | 4 | 22 | 0.0592421 | 10435 CDC42 effector protein (Rho GTPase binding) 2                           |
| GO Rho GTPase activator activity          | 4 | 22 | 0.0592421 | 23092 Rho GTPase activating protein 26                                        |
| GO Rho GTPase activator activity          | 4 | 22 | 0.0592421 | 3725 jun oncogene                                                             |
| GO Rho GTPase activator activity          | 4 | 22 | 0.0592421 | 395 Rho GTPase activating protein 6                                           |
| GO gluconeogenesis                        | 4 | 22 | 0.0592421 | 10891 peroxisome proliferator-activated receptor gamma, coactivator 1 alpha   |
| GO gluconeogenesis                        | 4 | 22 | 0.0592421 | 2026 enolase 2 (gamma, neuronal)                                              |
| GO gluconeogenesis                        | 4 | 22 | 0.0592421 | 467 activating transcription factor 3                                         |
| GO gluconeogenesis                        | 4 | 22 | 0.0592421 | 5950 retinol binding protein 4, plasma                                        |
| GO negative regulation of NF-kappaB tra   | 4 | 22 | 0.0592421 | 11213 interleukin-1 receptor-associated kinase 3                              |
| GO negative regulation of NF-kappaB tra   | 4 | 22 | 0.0592421 | 4792 nuclear factor of kappa light polypeptide gene enhancer in B-cells inhib |
| GO negative regulation of NF-kappaB tra   | 4 | 22 | 0.0592421 | 64127 nucleotide-binding oligomerization domain containing 2                  |
| GO negative regulation of NF-kappaB tra   | 4 | 22 | 0.0592421 | 7001 peroxiredoxin 2                                                          |
| GO cysteine-type endopeptidase inhibito   | 4 | 22 | 0.0592421 | 1469 cystatin SN                                                              |
| GO cysteine-type endopeptidase inhibito   | 4 | 22 | 0.0592421 | 1471 cystatin C                                                               |
| GO cysteine-type endopeptidase inhibito   | 4 | 22 | 0.0592421 | 26998 fetuin B                                                                |
| GO cysteine-type endopeptidase inhibito   | 4 | 22 | 0.0592421 | 3827 kininogen 1                                                              |
| GO blood vessel remodeling                | 4 | 22 | 0.0592421 | 183 angiotensinogen (serpin peptidase inhibitor, clade A, member 8)           |
| GO blood vessel remodeling                | 4 | 22 | 0.0592421 | 2296 forkhead box C1                                                          |

|    |                                        |    |     |           |        |                                                                           |
|----|----------------------------------------|----|-----|-----------|--------|---------------------------------------------------------------------------|
| GO | blood vessel remodeling                | 4  | 22  | 0.0592421 | 2303   | forkhead box C2 (MFH-1, mesenchyme forkhead 1)                            |
| GO | blood vessel remodeling                | 4  | 22  | 0.0592421 | 3479   | insulin-like growth factor 1 (somatomedin C)                              |
| GO | activation of phospholipase C activity | 4  | 22  | 0.0592421 | 1902   | lysophosphatidic acid receptor 1                                          |
| GO | activation of phospholipase C activity | 4  | 22  | 0.0592421 | 2769   | guanine nucleotide binding protein (G protein), alpha 15 (Gq class)       |
| GO | activation of phospholipase C activity | 4  | 22  | 0.0592421 | 395    | Rho GTPase activating protein 6                                           |
| GO | activation of phospholipase C activity | 4  | 22  | 0.0592421 | 799    | calcitonin receptor                                                       |
| GO | basal plasma membrane                  | 4  | 22  | 0.0592421 | 26119  | low density lipoprotein receptor adaptor protein 1                        |
| GO | basal plasma membrane                  | 4  | 22  | 0.0592421 | 358    | aquaporin 1 (Colton blood group)                                          |
| GO | basal plasma membrane                  | 4  | 22  | 0.0592421 | 3691   | integrin, beta 4                                                          |
| GO | basal plasma membrane                  | 4  | 22  | 0.0592421 | 9962   | solute carrier family 23 (nucleobase transporters), member 2              |
| GO | voltage-gated calcium channel compl    | 4  | 22  | 0.0592421 | 774    | calcium channel, voltage-dependent, N type, alpha 1B subunit              |
| GO | voltage-gated calcium channel compl    | 4  | 22  | 0.0592421 | 783    | calcium channel, voltage-dependent, beta 2 subunit                        |
| GO | voltage-gated calcium channel compl    | 4  | 22  | 0.0592421 | 8911   | calcium channel, voltage-dependent, T type, alpha 1I subunit              |
| GO | voltage-gated calcium channel compl    | 4  | 22  | 0.0592421 | 8912   | calcium channel, voltage-dependent, T type, alpha 1H subunit              |
| GO | positive regulation of cell migration  | 8  | 62  | 0.0594006 | 1435   | colony stimulating factor 1 (macrophage)                                  |
| GO | positive regulation of cell migration  | 8  | 62  | 0.0594006 | 1906   | endothelin 1                                                              |
| GO | positive regulation of cell migration  | 8  | 62  | 0.0594006 | 2066   | v-erb-a erythroblastic leukemia viral oncogene homolog 4 (avian)          |
| GO | positive regulation of cell migration  | 8  | 62  | 0.0594006 | 3175   | one cut homeobox 1                                                        |
| GO | positive regulation of cell migration  | 8  | 62  | 0.0594006 | 3643   | insulin receptor                                                          |
| GO | positive regulation of cell migration  | 8  | 62  | 0.0594006 | 3815   | v-kit Hardy-Zuckerman 4 feline sarcoma viral oncogene homolog             |
| GO | positive regulation of cell migration  | 8  | 62  | 0.0594006 | 79872  | Cas-Br-M (murine) ecotropic retroviral transforming sequence-like 1       |
| GO | positive regulation of cell migration  | 8  | 62  | 0.0594006 | 8660   | insulin receptor substrate 2                                              |
| GO | extracellular matrix organization      | 8  | 62  | 0.0594006 | 183    | angiotensinogen (serpin peptidase inhibitor, clade A, member 8)           |
| GO | extracellular matrix organization      | 8  | 62  | 0.0594006 | 1999   | E74-like factor 3 (ets domain transcription factor, epithelial-specific ) |
| GO | extracellular matrix organization      | 8  | 62  | 0.0594006 | 27035  | NADPH oxidase 1                                                           |
| GO | extracellular matrix organization      | 8  | 62  | 0.0594006 | 3491   | cysteine-rich, angiogenic inducer, 61                                     |
| GO | extracellular matrix organization      | 8  | 62  | 0.0594006 | 3958   | lectin, galactoside-binding, soluble, 3                                   |
| GO | extracellular matrix organization      | 8  | 62  | 0.0594006 | 4791   | nuclear factor of kappa light polypeptide gene enhancer in B-cells 2 (p4  |
| GO | extracellular matrix organization      | 8  | 62  | 0.0594006 | 6692   | serine peptidase inhibitor, Kunitz type 1                                 |
| GO | extracellular matrix organization      | 8  | 62  | 0.0594006 | 8434   | reversion-inducing-cysteine-rich protein with kazal motifs                |
| GO | G-protein coupled receptor activity    | 32 | 352 | 0.0607328 | 115330 | G protein-coupled receptor 146                                            |
| GO | G-protein coupled receptor activity    | 32 | 352 | 0.0607328 | 154    | adrenergic, beta-2-, receptor, surface                                    |
| GO | G-protein coupled receptor activity    | 32 | 352 | 0.0607328 | 1813   | dopamine receptor D2                                                      |
| GO | G-protein coupled receptor activity    | 32 | 352 | 0.0607328 | 1815   | dopamine receptor D4                                                      |
| GO | G-protein coupled receptor activity    | 32 | 352 | 0.0607328 | 1901   | sphingosine-1-phosphate receptor 1                                        |
| GO | G-protein coupled receptor activity    | 32 | 352 | 0.0607328 | 1902   | lysophosphatidic acid receptor 1                                          |

|    |                                     |    |     |           |                                                                               |
|----|-------------------------------------|----|-----|-----------|-------------------------------------------------------------------------------|
| GO | G-protein coupled receptor activity | 32 | 352 | 0.0607328 | 2015 egf-like module containing, mucin-like, hormone receptor-like 1          |
| GO | G-protein coupled receptor activity | 32 | 352 | 0.0607328 | 222545 G protein-coupled receptor, family C, group 6, member A                |
| GO | G-protein coupled receptor activity | 32 | 352 | 0.0607328 | 22859 latrophilin 1                                                           |
| GO | G-protein coupled receptor activity | 32 | 352 | 0.0607328 | 23266 latrophilin 2                                                           |
| GO | G-protein coupled receptor activity | 32 | 352 | 0.0607328 | 23284 latrophilin 3                                                           |
| GO | G-protein coupled receptor activity | 32 | 352 | 0.0607328 | 27202 G protein-coupled receptor 77                                           |
| GO | G-protein coupled receptor activity | 32 | 352 | 0.0607328 | 283383 G protein-coupled receptor 133                                         |
| GO | G-protein coupled receptor activity | 32 | 352 | 0.0607328 | 2861 G protein-coupled receptor 37 (endothelin receptor type B-like)          |
| GO | G-protein coupled receptor activity | 32 | 352 | 0.0607328 | 2865 free fatty acid receptor 3                                               |
| GO | G-protein coupled receptor activity | 32 | 352 | 0.0607328 | 2867 free fatty acid receptor 2                                               |
| GO | G-protein coupled receptor activity | 32 | 352 | 0.0607328 | 2911 glutamate receptor, metabotropic 1                                       |
| GO | G-protein coupled receptor activity | 32 | 352 | 0.0607328 | 3355 5-hydroxytryptamine (serotonin) receptor 1F                              |
| GO | G-protein coupled receptor activity | 32 | 352 | 0.0607328 | 338557 G protein-coupled receptor 120                                         |
| GO | G-protein coupled receptor activity | 32 | 352 | 0.0607328 | 353345 G protein-coupled receptor 141                                         |
| GO | G-protein coupled receptor activity | 32 | 352 | 0.0607328 | 387509 G protein-coupled receptor 153                                         |
| GO | G-protein coupled receptor activity | 32 | 352 | 0.0607328 | 4886 neuropeptide Y receptor Y1                                               |
| GO | G-protein coupled receptor activity | 32 | 352 | 0.0607328 | 4889 neuropeptide Y receptor Y5                                               |
| GO | G-protein coupled receptor activity | 32 | 352 | 0.0607328 | 56923 neuromedin U receptor 2                                                 |
| GO | G-protein coupled receptor activity | 32 | 352 | 0.0607328 | 5724 platelet-activating factor receptor                                      |
| GO | G-protein coupled receptor activity | 32 | 352 | 0.0607328 | 5732 prostaglandin E receptor 2 (subtype EP2), 53kDa                          |
| GO | G-protein coupled receptor activity | 32 | 352 | 0.0607328 | 5734 prostaglandin E receptor 4 (subtype EP4)                                 |
| GO | G-protein coupled receptor activity | 32 | 352 | 0.0607328 | 5737 prostaglandin F receptor (FP)                                            |
| GO | G-protein coupled receptor activity | 32 | 352 | 0.0607328 | 57512 G protein-coupled receptor 158                                          |
| GO | G-protein coupled receptor activity | 32 | 352 | 0.0607328 | 6751 somatostatin receptor 1                                                  |
| GO | G-protein coupled receptor activity | 32 | 352 | 0.0607328 | 7852 chemokine (C-X-C motif) receptor 4                                       |
| GO | G-protein coupled receptor activity | 32 | 352 | 0.0607328 | 84059 G protein-coupled receptor 98                                           |
| GO | anti-apoptosis                      | 18 | 178 | 0.061715  | 10507 sema domain, immunoglobulin domain (Ig), transmembrane domain (T        |
| GO | anti-apoptosis                      | 18 | 178 | 0.061715  | 1612 death-associated protein kinase 1                                        |
| GO | anti-apoptosis                      | 18 | 178 | 0.061715  | 2296 forkhead box C1                                                          |
| GO | anti-apoptosis                      | 18 | 178 | 0.061715  | 2303 forkhead box C2 (MFH-1, mesenchyme forkhead 1)                           |
| GO | anti-apoptosis                      | 18 | 178 | 0.061715  | 3479 insulin-like growth factor 1 (somatomedin C)                             |
| GO | anti-apoptosis                      | 18 | 178 | 0.061715  | 4170 myeloid cell leukemia sequence 1 (BCL2-related)                          |
| GO | anti-apoptosis                      | 18 | 178 | 0.061715  | 4792 nuclear factor of kappa light polypeptide gene enhancer in B-cells inhib |
| GO | anti-apoptosis                      | 18 | 178 | 0.061715  | 4853 Notch homolog 2 (Drosophila)                                             |
| GO | anti-apoptosis                      | 18 | 178 | 0.061715  | 573 BCL2-associated athanogene                                                |
| GO | anti-apoptosis                      | 18 | 178 | 0.061715  | 627 brain-derived neurotrophic factor                                         |



|                                          |    |     |           |                                                                             |
|------------------------------------------|----|-----|-----------|-----------------------------------------------------------------------------|
| GO anti-apoptosis                        | 18 | 178 | 0.061715  | 6622 synuclein, alpha (non A4 component of amyloid precursor)               |
| GO anti-apoptosis                        | 18 | 178 | 0.061715  | 7001 peroxiredoxin 2                                                        |
| GO anti-apoptosis                        | 18 | 178 | 0.061715  | 79444 baculoviral IAP repeat-containing 7                                   |
| GO anti-apoptosis                        | 18 | 178 | 0.061715  | 8382 non-metastatic cells 5, protein expressed in (nucleoside-diphosphate k |
| GO anti-apoptosis                        | 18 | 178 | 0.061715  | 8793 tumor necrosis factor receptor superfamily, member 10d, decoy with t   |
| GO anti-apoptosis                        | 18 | 178 | 0.061715  | 8996 nucleolar protein 3 (apoptosis repressor with CARD domain)             |
| GO anti-apoptosis                        | 18 | 178 | 0.061715  | 9021 suppressor of cytokine signaling 3                                     |
| GO anti-apoptosis                        | 18 | 178 | 0.061715  | 9214 Fas apoptotic inhibitory molecule 3                                    |
| GO positive regulation of anti-apoptosis | 5  | 32  | 0.0640368 | 1843 dual specificity phosphatase 1                                         |
| GO positive regulation of anti-apoptosis | 5  | 32  | 0.0640368 | 2066 v-erb-a erythroblastic leukemia viral oncogene homolog 4 (avian)       |
| GO positive regulation of anti-apoptosis | 5  | 32  | 0.0640368 | 3569 interleukin 6 (interferon, beta 2)                                     |
| GO positive regulation of anti-apoptosis | 5  | 32  | 0.0640368 | 3570 interleukin 6 receptor                                                 |
| GO positive regulation of anti-apoptosis | 5  | 32  | 0.0640368 | 4889 neuropeptide Y receptor Y5                                             |
| GO spermatid development                 | 5  | 32  | 0.0640368 | 3306 heat shock 70kDa protein 2                                             |
| GO spermatid development                 | 5  | 32  | 0.0640368 | 3815 v-kit Hardy-Zuckerman 4 feline sarcoma viral oncogene homolog          |
| GO spermatid development                 | 5  | 32  | 0.0640368 | 8382 non-metastatic cells 5, protein expressed in (nucleoside-diphosphate k |
| GO spermatid development                 | 5  | 32  | 0.0640368 | 9271 piwi-like 1 (Drosophila)                                               |
| GO spermatid development                 | 5  | 32  | 0.0640368 | 9985 REC8 homolog (yeast)                                                   |
| GO apical part of cell                   | 6  | 42  | 0.0642702 | 358 aquaporin 1 (Colton blood group)                                        |
| GO apical part of cell                   | 6  | 42  | 0.0642702 | 5025 purinergic receptor P2X, ligand-gated ion channel, 4                   |
| GO apical part of cell                   | 6  | 42  | 0.0642702 | 50617 ATPase, H+ transporting, lysosomal V0 subunit a4                      |
| GO apical part of cell                   | 6  | 42  | 0.0642702 | 5327 plasminogen activator, tissue                                          |
| GO apical part of cell                   | 6  | 42  | 0.0642702 | 760 carbonic anhydrase II                                                   |
| GO apical part of cell                   | 6  | 42  | 0.0642702 | 81693 amnionless homolog (mouse)                                            |
| GO cytokine activity                     | 15 | 143 | 0.0644498 | 10447 family with sequence similarity 3, member C                           |
| GO cytokine activity                     | 15 | 143 | 0.0644498 | 1435 colony stimulating factor 1 (macrophage)                               |
| GO cytokine activity                     | 15 | 143 | 0.0644498 | 23529 cardiotrophin-like cytokine factor 1                                  |
| GO cytokine activity                     | 15 | 143 | 0.0644498 | 3569 interleukin 6 (interferon, beta 2)                                     |
| GO cytokine activity                     | 15 | 143 | 0.0644498 | 4254 KIT ligand                                                             |
| GO cytokine activity                     | 15 | 143 | 0.0644498 | 50604 interleukin 20                                                        |
| GO cytokine activity                     | 15 | 143 | 0.0644498 | 64388 gremlin 2, cysteine knot superfamily, homolog (Xenopus laevis)        |
| GO cytokine activity                     | 15 | 143 | 0.0644498 | 652 bone morphogenetic protein 4                                            |
| GO cytokine activity                     | 15 | 143 | 0.0644498 | 8600 tumor necrosis factor (ligand) superfamily, member 11                  |
| GO cytokine activity                     | 15 | 143 | 0.0644498 | 8740 tumor necrosis factor (ligand) superfamily, member 14                  |
| GO cytokine activity                     | 15 | 143 | 0.0644498 | 8744 tumor necrosis factor (ligand) superfamily, member 9                   |
| GO cytokine activity                     | 15 | 143 | 0.0644498 | 90865 interleukin 33                                                        |

|                                            |    |     |           |                                                                              |
|--------------------------------------------|----|-----|-----------|------------------------------------------------------------------------------|
| GO cytokine activity                       | 15 | 143 | 0.0644498 | 92304 secretoglobin, family 3A, member 1                                     |
| GO cytokine activity                       | 15 | 143 | 0.0644498 | 9518 growth differentiation factor 15                                        |
| GO cytokine activity                       | 15 | 143 | 0.0644498 | 9966 tumor necrosis factor (ligand) superfamily, member 15                   |
| GO transcription repressor binding         | 3  | 14  | 0.0658037 | 10014 histone deacetylase 5                                                  |
| GO transcription repressor binding         | 3  | 14  | 0.0658037 | 2737 GLI family zinc finger 3                                                |
| GO transcription repressor binding         | 3  | 14  | 0.0658037 | 9734 histone deacetylase 9                                                   |
| GO response to starvation                  | 3  | 14  | 0.0658037 | 10891 peroxisome proliferator-activated receptor gamma, coactivator 1 alpha  |
| GO response to starvation                  | 3  | 14  | 0.0658037 | 1373 carbamoyl-phosphate synthetase 1, mitochondrial                         |
| GO response to starvation                  | 3  | 14  | 0.0658037 | 35 acyl-Coenzyme A dehydrogenase, C-2 to C-3 short chain                     |
| GO regulation of sensory perception of p   | 3  | 14  | 0.0658037 | 154 adrenergic, beta-2-, receptor, surface                                   |
| GO regulation of sensory perception of p   | 3  | 14  | 0.0658037 | 2911 glutamate receptor, metabotropic 1                                      |
| GO regulation of sensory perception of p   | 3  | 14  | 0.0658037 | 885 cholecystokinin                                                          |
| GO regulation of vasoconstriction          | 3  | 14  | 0.0658037 | 183 angiotensinogen (serpin peptidase inhibitor, clade A, member 8)          |
| GO regulation of vasoconstriction          | 3  | 14  | 0.0658037 | 1906 endothelin 1                                                            |
| GO regulation of vasoconstriction          | 3  | 14  | 0.0658037 | 27345 potassium large conductance calcium-activated channel, subfamily M,    |
| GO regulation of neuronal synaptic plasti  | 3  | 14  | 0.0658037 | 1959 early growth response 2                                                 |
| GO regulation of neuronal synaptic plasti  | 3  | 14  | 0.0658037 | 5367 pro-melanin-concentrating hormone                                       |
| GO regulation of neuronal synaptic plasti  | 3  | 14  | 0.0658037 | 8553 basic helix-loop-helix family, member e40                               |
| GO positive regulation of protein secretic | 3  | 14  | 0.0658037 | 2033 E1A binding protein p300                                                |
| GO positive regulation of protein secretic | 3  | 14  | 0.0658037 | 3783 potassium intermediate/small conductance calcium-activated channel,     |
| GO positive regulation of protein secretic | 3  | 14  | 0.0658037 | 5122 proprotein convertase subtilisin/kexin type 1                           |
| GO artery morphogenesis                    | 3  | 14  | 0.0658037 | 2296 forkhead box C1                                                         |
| GO artery morphogenesis                    | 3  | 14  | 0.0658037 | 2303 forkhead box C2 (MFH-1, mesenchyme forkhead 1)                          |
| GO artery morphogenesis                    | 3  | 14  | 0.0658037 | 5396 paired related homeobox 1                                               |
| GO eye development                         | 3  | 14  | 0.0658037 | 2296 forkhead box C1                                                         |
| GO eye development                         | 3  | 14  | 0.0658037 | 4212 Meis homeobox 2                                                         |
| GO eye development                         | 3  | 14  | 0.0658037 | 5950 retinol binding protein 4, plasma                                       |
| GO negative regulation of mitotic cell cyc | 3  | 14  | 0.0658037 | 2296 forkhead box C1                                                         |
| GO negative regulation of mitotic cell cyc | 3  | 14  | 0.0658037 | 5371 promyelocytic leukemia                                                  |
| GO negative regulation of mitotic cell cyc | 3  | 14  | 0.0658037 | 5774 protein tyrosine phosphatase, non-receptor type 3                       |
| GO sialyltransferase activity              | 3  | 14  | 0.0658037 | 27090 ST6 (alpha-N-acetyl-neuraminyl-2,3-beta-galactosyl-1,3)-N-acetylgalact |
| GO sialyltransferase activity              | 3  | 14  | 0.0658037 | 55808 ST6 (alpha-N-acetyl-neuraminyl-2,3-beta-galactosyl-1,3)-N-acetylgalact |
| GO sialyltransferase activity              | 3  | 14  | 0.0658037 | 6489 ST8 alpha-N-acetyl-neuraminide alpha-2,8-sialyltransferase 1            |
| GO DNA damage response, signal transdi     | 3  | 14  | 0.0658037 | 28996 homeodomain interacting protein kinase 2                               |
| GO DNA damage response, signal transdi     | 3  | 14  | 0.0658037 | 3428 interferon, gamma-inducible protein 16                                  |
| GO DNA damage response, signal transdi     | 3  | 14  | 0.0658037 | 5371 promyelocytic leukemia                                                  |

|    |                                         |    |     |           |                                                                              |
|----|-----------------------------------------|----|-----|-----------|------------------------------------------------------------------------------|
| GO | response to ATP                         | 3  | 14  | 0.0658037 | 5025 purinergic receptor P2X, ligand-gated ion channel, 4                    |
| GO | response to ATP                         | 3  | 14  | 0.0658037 | 6402 selectin L                                                              |
| GO | response to ATP                         | 3  | 14  | 0.0658037 | 834 caspase 1, apoptosis-related cysteine peptidase (interleukin 1, beta, co |
| GO | proteasome core complex                 | 3  | 14  | 0.0658037 | 5696 proteasome (prosome, macropain) subunit, beta type, 8 (large multifur   |
| GO | proteasome core complex                 | 3  | 14  | 0.0658037 | 5698 proteasome (prosome, macropain) subunit, beta type, 9 (large multifur   |
| GO | proteasome core complex                 | 3  | 14  | 0.0658037 | 5699 proteasome (prosome, macropain) subunit, beta type, 10                  |
| GO | guanyl-nucleotide exchange factor ac    | 13 | 120 | 0.0663024 | 152273 FYVE, RhoGEF and PH domain containing 5                               |
| GO | guanyl-nucleotide exchange factor ac    | 13 | 120 | 0.0663024 | 23179 ral guanine nucleotide dissociation stimulator-like 1                  |
| GO | guanyl-nucleotide exchange factor ac    | 13 | 120 | 0.0663024 | 23263 MCF.2 cell line derived transforming sequence-like                     |
| GO | guanyl-nucleotide exchange factor ac    | 13 | 120 | 0.0663024 | 23348 dedicator of cytokinesis 9                                             |
| GO | guanyl-nucleotide exchange factor ac    | 13 | 120 | 0.0663024 | 23365 Rho guanine nucleotide exchange factor (GEF) 12                        |
| GO | guanyl-nucleotide exchange factor ac    | 13 | 120 | 0.0663024 | 389337 Rho guanine nucleotide exchange factor (GEF) 37                       |
| GO | guanyl-nucleotide exchange factor ac    | 13 | 120 | 0.0663024 | 54848 Rho guanine nucleotide exchange factor (GEF) 38                        |
| GO | guanyl-nucleotide exchange factor ac    | 13 | 120 | 0.0663024 | 55160 Rho guanine nucleotide exchange factor (GEF) 10-like                   |
| GO | guanyl-nucleotide exchange factor ac    | 13 | 120 | 0.0663024 | 57139 ral guanine nucleotide dissociation stimulator-like 3                  |
| GO | guanyl-nucleotide exchange factor ac    | 13 | 120 | 0.0663024 | 5900 ral guanine nucleotide dissociation stimulator                          |
| GO | guanyl-nucleotide exchange factor ac    | 13 | 120 | 0.0663024 | 7984 Rho guanine nucleotide exchange factor (GEF) 5                          |
| GO | guanyl-nucleotide exchange factor ac    | 13 | 120 | 0.0663024 | 84033 obscurin, cytoskeletal calmodulin and titin-interacting RhoGEF         |
| GO | guanyl-nucleotide exchange factor ac    | 13 | 120 | 0.0663024 | 9459 Rac/Cdc42 guanine nucleotide exchange factor (GEF) 6                    |
| GO | galactosyltransferase activity          | 4  | 23  | 0.0679884 | 10317 UDP-Gal:betaGlcNAc beta 1,3-galactosyltransferase, polypeptide 5       |
| GO | galactosyltransferase activity          | 4  | 23  | 0.0679884 | 192134 UDP-GlcNAc:betaGal beta-1,3-N-acetylglucosaminyltransferase 6 (core   |
| GO | galactosyltransferase activity          | 4  | 23  | 0.0679884 | 53947 alpha 1,4-galactosyltransferase                                        |
| GO | galactosyltransferase activity          | 4  | 23  | 0.0679884 | 8706 beta-1,3-N-acetylgalactosaminyltransferase 1 (globoside blood group)    |
| GO | activation of MAPKK activity            | 4  | 23  | 0.0679884 | 10912 growth arrest and DNA-damage-inducible, gamma                          |
| GO | activation of MAPKK activity            | 4  | 23  | 0.0679884 | 2911 glutamate receptor, metabotropic 1                                      |
| GO | activation of MAPKK activity            | 4  | 23  | 0.0679884 | 4616 growth arrest and DNA-damage-inducible, beta                            |
| GO | activation of MAPKK activity            | 4  | 23  | 0.0679884 | 652 bone morphogenetic protein 4                                             |
| GO | voltage-gated calcium channel activit   | 4  | 23  | 0.0679884 | 55799 calcium channel, voltage-dependent, alpha 2/delta subunit 3            |
| GO | voltage-gated calcium channel activit   | 4  | 23  | 0.0679884 | 774 calcium channel, voltage-dependent, N type, alpha 1B subunit             |
| GO | voltage-gated calcium channel activit   | 4  | 23  | 0.0679884 | 783 calcium channel, voltage-dependent, beta 2 subunit                       |
| GO | voltage-gated calcium channel activit   | 4  | 23  | 0.0679884 | 8911 calcium channel, voltage-dependent, T type, alpha 1I subunit            |
| GO | negative regulation of cell migration i | 1  | 1   | 0.0683482 | 10014 histone deacetylase 5                                                  |
| GO | 3-alpha(17-beta)-hydroxysteroid deh     | 1  | 1   | 0.0683482 | 10170 dehydrogenase/reductase (SDR family) member 9                          |
| GO | racemase and epimerase activity         | 1  | 1   | 0.0683482 | 10170 dehydrogenase/reductase (SDR family) member 9                          |
| GO | lung growth                             | 1  | 1   | 0.0683482 | 10253 sprouty homolog 2 (Drosophila)                                         |
| GO | ATP-binding and phosphorylation-dej     | 1  | 1   | 0.0683482 | 1080 cystic fibrosis transmembrane conductance regulator (ATP-binding cas:   |

|                                            |   |   |           |                                                                           |
|--------------------------------------------|---|---|-----------|---------------------------------------------------------------------------|
| GO channel-conductance-controlling ATP     | 1 | 1 | 0.0683482 | 1080 cystic fibrosis transmembrane conductance regulator (ATP-binding cas |
| GO actin modification                      | 1 | 1 | 0.0683482 | 11078 TRIO and F-actin binding protein                                    |
| GO myosin II binding                       | 1 | 1 | 0.0683482 | 11078 TRIO and F-actin binding protein                                    |
| GO regulation of synapse organization      | 1 | 1 | 0.0683482 | 11202 kallikrein-related peptidase 8                                      |
| GO negative regulation of innate immun     | 1 | 1 | 0.0683482 | 11213 interleukin-1 receptor-associated kinase 3                          |
| GO negative regulation of macrophage c     | 1 | 1 | 0.0683482 | 11213 interleukin-1 receptor-associated kinase 3                          |
| GO positive regulation of macrophage to    | 1 | 1 | 0.0683482 | 11213 interleukin-1 receptor-associated kinase 3                          |
| GO regulation of protein complex disasse   | 1 | 1 | 0.0683482 | 11213 interleukin-1 receptor-associated kinase 3                          |
| GO acyl carnitine transport                | 1 | 1 | 0.0683482 | 123096 solute carrier family 25, member 29                                |
| GO sphinganine metabolic process           | 1 | 1 | 0.0683482 | 123099 degenerative spermatocyte homolog 2, lipid desaturase (Drosophila) |
| GO sphingolipid delta-4 desaturase activi  | 1 | 1 | 0.0683482 | 123099 degenerative spermatocyte homolog 2, lipid desaturase (Drosophila) |
| GO sphingosine hydroxylase activity        | 1 | 1 | 0.0683482 | 123099 degenerative spermatocyte homolog 2, lipid desaturase (Drosophila) |
| GO neuronal RNA granule                    | 1 | 1 | 0.0683482 | 127933 U2AF homology motif (UHM) kinase 1                                 |
| GO collagen type VIII                      | 1 | 1 | 0.0683482 | 1295 collagen, type VIII, alpha 1                                         |
| GO carbamoyl phosphate biosynthetic pr     | 1 | 1 | 0.0683482 | 1373 carbamoyl-phosphate synthetase 1, mitochondrial                      |
| GO carbamoyl-phosphate synthase (amn       | 1 | 1 | 0.0683482 | 1373 carbamoyl-phosphate synthetase 1, mitochondrial                      |
| GO carbamoyl-phosphate synthase activi     | 1 | 1 | 0.0683482 | 1373 carbamoyl-phosphate synthetase 1, mitochondrial                      |
| GO citrulline biosynthetic process         | 1 | 1 | 0.0683482 | 1373 carbamoyl-phosphate synthetase 1, mitochondrial                      |
| GO nitric oxide metabolic process          | 1 | 1 | 0.0683482 | 1373 carbamoyl-phosphate synthetase 1, mitochondrial                      |
| GO mammary gland fat development           | 1 | 1 | 0.0683482 | 1435 colony stimulating factor 1 (macrophage)                             |
| GO positive regulation of mononuclear c    | 1 | 1 | 0.0683482 | 1435 colony stimulating factor 1 (macrophage)                             |
| GO regulation of macrophage derived fo     | 1 | 1 | 0.0683482 | 1435 colony stimulating factor 1 (macrophage)                             |
| GO reproductive developmental process      | 1 | 1 | 0.0683482 | 1435 colony stimulating factor 1 (macrophage)                             |
| GO negative regulation of blood vessel re  | 1 | 1 | 0.0683482 | 1471 cystatin C                                                           |
| GO negative regulation of collagen catab   | 1 | 1 | 0.0683482 | 1471 cystatin C                                                           |
| GO negative regulation of elastin catabol  | 1 | 1 | 0.0683482 | 1471 cystatin C                                                           |
| GO negative regulation of histolysis       | 1 | 1 | 0.0683482 | 1471 cystatin C                                                           |
| GO regulation of tissue remodeling         | 1 | 1 | 0.0683482 | 1471 cystatin C                                                           |
| GO beta2-adrenergic receptor activity      | 1 | 1 | 0.0683482 | 154 adrenergic, beta-2-, receptor, surface                                |
| GO cellular amide metabolic process        | 1 | 1 | 0.0683482 | 1559 cytochrome P450, family 2, subfamily C, polypeptide 9                |
| GO urea metabolic process                  | 1 | 1 | 0.0683482 | 1559 cytochrome P450, family 2, subfamily C, polypeptide 9                |
| GO regulation of endothelial cell migratic | 1 | 1 | 0.0683482 | 168667 BMP binding endothelial regulator                                  |
| GO induction of bacterial agglutination    | 1 | 1 | 0.0683482 | 1755 deleted in malignant brain tumors 1                                  |
| GO zymogen binding                         | 1 | 1 | 0.0683482 | 1755 deleted in malignant brain tumors 1                                  |
| GO establishment of localization           | 1 | 1 | 0.0683482 | 1803 dipeptidyl-peptidase 4                                               |
| GO invadopodium membrane                   | 1 | 1 | 0.0683482 | 1803 dipeptidyl-peptidase 4                                               |

|    |                                         |   |   |           |                                                                            |
|----|-----------------------------------------|---|---|-----------|----------------------------------------------------------------------------|
| GO | regulation of T cell mediated immuni    | 1 | 1 | 0.0683482 | 1803 dipeptidyl-peptidase 4                                                |
| GO | dopamine D2 receptor activity           | 1 | 1 | 0.0683482 | 1813 dopamine receptor D2                                                  |
| GO | dopamine D4 receptor activity           | 1 | 1 | 0.0683482 | 1815 dopamine receptor D4                                                  |
| GO | toxin receptor binding                  | 1 | 1 | 0.0683482 | 1822 atrophin 1                                                            |
| GO | angiotensin mediated vasoconstricti     | 1 | 1 | 0.0683482 | 183 angiotensinogen (serpin peptidase inhibitor, clade A, member 8)        |
| GO | renal response to blood flow involve    | 1 | 1 | 0.0683482 | 183 angiotensinogen (serpin peptidase inhibitor, clade A, member 8)        |
| GO | response to muscle activity involved i  | 1 | 1 | 0.0683482 | 183 angiotensinogen (serpin peptidase inhibitor, clade A, member 8)        |
| GO | type 2 angiotensin receptor binding     | 1 | 1 | 0.0683482 | 183 angiotensinogen (serpin peptidase inhibitor, clade A, member 8)        |
| GO | negative regulation of elastin biosynt  | 1 | 1 | 0.0683482 | 1839 heparin-binding EGF-like growth factor                                |
| GO | activation of phospholipase D activity  | 1 | 1 | 0.0683482 | 1906 endothelin 1                                                          |
| GO | endothelin A receptor binding           | 1 | 1 | 0.0683482 | 1906 endothelin 1                                                          |
| GO | negative regulation of nitric-oxide syn | 1 | 1 | 0.0683482 | 1906 endothelin 1                                                          |
| GO | protein kinase C deactivation           | 1 | 1 | 0.0683482 | 1906 endothelin 1                                                          |
| GO | O-glycan processing, core 3             | 1 | 1 | 0.0683482 | 192134 UDP-GlcNAc:betaGal beta-1,3-N-acetylglucosaminyltransferase 6 (core |
| GO | rhombomere 3 formation                  | 1 | 1 | 0.0683482 | 1959 early growth response 2                                               |
| GO | rhombomere 5 formation                  | 1 | 1 | 0.0683482 | 1959 early growth response 2                                               |
| GO | axial mesoderm formation                | 1 | 1 | 0.0683482 | 1969 EPH receptor A2                                                       |
| GO | notochord cell development              | 1 | 1 | 0.0683482 | 1969 EPH receptor A2                                                       |
| GO | negative regulation of cellular metab   | 1 | 1 | 0.0683482 | 2033 E1A binding protein p300                                              |
| GO | positive regulation of cellular metab   | 1 | 1 | 0.0683482 | 2033 E1A binding protein p300                                              |
| GO | regulation of angiotensin metabolic p   | 1 | 1 | 0.0683482 | 2033 E1A binding protein p300                                              |
| GO | synapse maturation                      | 1 | 1 | 0.0683482 | 2066 v-erb-a erythroblastic leukemia viral oncogene homolog 4 (avian)      |
| GO | hemopoietic stem cell proliferation     | 1 | 1 | 0.0683482 | 2122 MDS1 and EVI1 complex locus                                           |
| GO | positive regulation of type I hypersen  | 1 | 1 | 0.0683482 | 2205 Fc fragment of IgE, high affinity I, receptor for; alpha polypeptide  |
| GO | pancreatic D cell differentiation       | 1 | 1 | 0.0683482 | 222546 regulatory factor X, 6                                              |
| GO | pancreatic E cell differentiation       | 1 | 1 | 0.0683482 | 222546 regulatory factor X, 6                                              |
| GO | cytoskeleton-dependent intracellular    | 1 | 1 | 0.0683482 | 23095 kinesin family member 1B                                             |
| GO | latrotoxin receptor activity            | 1 | 1 | 0.0683482 | 23266 latrophilin 2                                                        |
| GO | low-density lipoprotein receptor cata   | 1 | 1 | 0.0683482 | 255738 proprotein convertase subtilisin/kexin type 9                       |
| GO | glutamate catabolic process             | 1 | 1 | 0.0683482 | 2571 glutamate decarboxylase 1 (brain, 67kDa)                              |
| GO | protein-pyridoxal-5-phosphate linkag    | 1 | 1 | 0.0683482 | 2571 glutamate decarboxylase 1 (brain, 67kDa)                              |
| GO | exocrine system development             | 1 | 1 | 0.0683482 | 25837 RAB26, member RAS oncogene family                                    |
| GO | intrinsic to plasma membrane            | 1 | 1 | 0.0683482 | 25837 RAB26, member RAS oncogene family                                    |
| GO | racemase and epimerase activity, act    | 1 | 1 | 0.0683482 | 26035 glucuronic acid epimerase                                            |
| GO | UDP-glucuronate 5'-epimerase activit    | 1 | 1 | 0.0683482 | 26035 glucuronic acid epimerase                                            |
| GO | vitamin transporter activity            | 1 | 1 | 0.0683482 | 2638 group-specific component (vitamin D binding protein)                  |

|                                            |   |   |           |                                                                             |
|--------------------------------------------|---|---|-----------|-----------------------------------------------------------------------------|
| GO vitamin transport                       | 1 | 1 | 0.0683482 | 2638 group-specific component (vitamin D binding protein)                   |
| GO FADH2 metabolic process                 | 1 | 1 | 0.0683482 | 27035 NADPH oxidase 1                                                       |
| GO intracellular pH elevation              | 1 | 1 | 0.0683482 | 27035 NADPH oxidase 1                                                       |
| GO (alpha-N-acetylneuraminy-2,3-beta-ξ     | 1 | 1 | 0.0683482 | 27090 ST6 (alpha-N-acetyl-neuraminy-2,3-beta-galactosyl-1,3)-N-acetylgalact |
| GO anterior semicircular canal developm    | 1 | 1 | 0.0683482 | 2737 GLI family zinc finger 3                                               |
| GO lateral semicircular canal developmei   | 1 | 1 | 0.0683482 | 2737 GLI family zinc finger 3                                               |
| GO pallium development                     | 1 | 1 | 0.0683482 | 2737 GLI family zinc finger 3                                               |
| GO ferritin receptor activity              | 1 | 1 | 0.0683482 | 286133 scavenger receptor class A, member 5 (putative)                      |
| GO iron ion transmembrane transport        | 1 | 1 | 0.0683482 | 286133 scavenger receptor class A, member 5 (putative)                      |
| GO negative regulation of interleukin-10   | 1 | 1 | 0.0683482 | 28951 tribbles homolog 2 (Drosophila)                                       |
| GO histidine ammonia-lyase activity        | 1 | 1 | 0.0683482 | 3034 histidine ammonia-lyase                                                |
| GO radial spoke                            | 1 | 1 | 0.0683482 | 345895 radial spoke head 4 homolog A (Chlamydomonas)                        |
| GO glycolate metabolic process             | 1 | 1 | 0.0683482 | 3479 insulin-like growth factor 1 (somatomedin C)                           |
| GO muscle hypertrophy                      | 1 | 1 | 0.0683482 | 3479 insulin-like growth factor 1 (somatomedin C)                           |
| GO myotube cell development                | 1 | 1 | 0.0683482 | 3479 insulin-like growth factor 1 (somatomedin C)                           |
| GO satellite cell maintenance involved in  | 1 | 1 | 0.0683482 | 3479 insulin-like growth factor 1 (somatomedin C)                           |
| GO intussusceptive angiogenesis            | 1 | 1 | 0.0683482 | 3491 cysteine-rich, angiogenic inducer, 61                                  |
| GO butyryl-CoA dehydrogenase activity      | 1 | 1 | 0.0683482 | 35 acyl-Coenzyme A dehydrogenase, C-2 to C-3 short chain                    |
| GO glucagon secretion                      | 1 | 1 | 0.0683482 | 3569 interleukin 6 (interferon, beta 2)                                     |
| GO positive regulation of B cell activator | 1 | 1 | 0.0683482 | 3569 interleukin 6 (interferon, beta 2)                                     |
| GO ciliary neurotrophic factor binding     | 1 | 1 | 0.0683482 | 3570 interleukin 6 receptor                                                 |
| GO positive regulation of activation of Ja | 1 | 1 | 0.0683482 | 3570 interleukin 6 receptor                                                 |
| GO carbon dioxide transmembrane trans      | 1 | 1 | 0.0683482 | 358 aquaporin 1 (Colton blood group)                                        |
| GO carbon dioxide transmembrane trans      | 1 | 1 | 0.0683482 | 358 aquaporin 1 (Colton blood group)                                        |
| GO cellular hyperosmotic response          | 1 | 1 | 0.0683482 | 358 aquaporin 1 (Colton blood group)                                        |
| GO cellular response to inorganic substai  | 1 | 1 | 0.0683482 | 358 aquaporin 1 (Colton blood group)                                        |
| GO cellular response to mechanical stimu   | 1 | 1 | 0.0683482 | 358 aquaporin 1 (Colton blood group)                                        |
| GO cellular response to nitric oxide       | 1 | 1 | 0.0683482 | 358 aquaporin 1 (Colton blood group)                                        |
| GO cellular response to salt stress        | 1 | 1 | 0.0683482 | 358 aquaporin 1 (Colton blood group)                                        |
| GO establishment or maintenance of acti    | 1 | 1 | 0.0683482 | 358 aquaporin 1 (Colton blood group)                                        |
| GO maintenance of symbiont-containing      | 1 | 1 | 0.0683482 | 358 aquaporin 1 (Colton blood group)                                        |
| GO nitric oxide transmembrane transpor     | 1 | 1 | 0.0683482 | 358 aquaporin 1 (Colton blood group)                                        |
| GO symbiont-containing vacuole membr       | 1 | 1 | 0.0683482 | 358 aquaporin 1 (Colton blood group)                                        |
| GO transepithelial water transport         | 1 | 1 | 0.0683482 | 358 aquaporin 1 (Colton blood group)                                        |
| GO insulin receptor activity               | 1 | 1 | 0.0683482 | 3643 insulin receptor                                                       |
| GO positive regulation of developmental    | 1 | 1 | 0.0683482 | 3643 insulin receptor                                                       |

|                                              |   |   |           |                                                                    |
|----------------------------------------------|---|---|-----------|--------------------------------------------------------------------|
| GO transformation of host cell by virus      | 1 | 1 | 0.0683482 | 3643 insulin receptor                                              |
| GO leading edge cell differentiation         | 1 | 1 | 0.0683482 | 3725 jun oncogene                                                  |
| GO regulation of synaptic growth at neur     | 1 | 1 | 0.0683482 | 375790 agrin                                                       |
| GO stem cell factor receptor activity        | 1 | 1 | 0.0683482 | 3815 v-kit Hardy-Zuckerman 4 feline sarcoma viral oncogene homolog |
| GO GMP binding                               | 1 | 1 | 0.0683482 | 3845 v-Ki-ras2 Kirsten rat sarcoma viral oncogene homolog          |
| GO laminin-5 complex                         | 1 | 1 | 0.0683482 | 3911 laminin, alpha 5                                              |
| GO morphogenesis of a polarized epithel      | 1 | 1 | 0.0683482 | 3911 laminin, alpha 5                                              |
| GO axon extension involved in regenerat      | 1 | 1 | 0.0683482 | 3913 laminin, beta 2 (laminin 5)                                   |
| GO positive regulation of phospholipase      | 1 | 1 | 0.0683482 | 395 Rho GTPase activating protein 6                                |
| GO cellular response to vitamin A            | 1 | 1 | 0.0683482 | 4056 leukotriene C4 synthase                                       |
| GO steryl-sulfatase activity                 | 1 | 1 | 0.0683482 | 412 steroid sulfatase (microsomal), isozyme S                      |
| GO mannosidase activity                      | 1 | 1 | 0.0683482 | 4121 mannosidase, alpha, class 1A, member 1                        |
| GO protein channel activity                  | 1 | 1 | 0.0683482 | 4170 myeloid cell leukemia sequence 1 (BCL2-related)               |
| GO inner acrosomal membrane                  | 1 | 1 | 0.0683482 | 4179 CD46 molecule, complement regulatory protein                  |
| GO G0 to G1 transition                       | 1 | 1 | 0.0683482 | 4194 Mdm4 p53 binding protein homolog (mouse)                      |
| GO double-stranded methylated DNA bir        | 1 | 1 | 0.0683482 | 4204 methyl CpG binding protein 2 (Rett syndrome)                  |
| GO positive regulation of myeloid leukoc     | 1 | 1 | 0.0683482 | 4254 KIT ligand                                                    |
| GO cellular response to magnetism            | 1 | 1 | 0.0683482 | 429 achaete-scute complex homolog 1 (Drosophila)                   |
| GO lung epithelial cell differentiation      | 1 | 1 | 0.0683482 | 429 achaete-scute complex homolog 1 (Drosophila)                   |
| GO neuroblast fate determination             | 1 | 1 | 0.0683482 | 429 achaete-scute complex homolog 1 (Drosophila)                   |
| GO noradrenergic neuron fate commitm         | 1 | 1 | 0.0683482 | 429 achaete-scute complex homolog 1 (Drosophila)                   |
| GO oligodendrocyte cell fate commitmer       | 1 | 1 | 0.0683482 | 429 achaete-scute complex homolog 1 (Drosophila)                   |
| GO regulation of timing of subpallium ne     | 1 | 1 | 0.0683482 | 429 achaete-scute complex homolog 1 (Drosophila)                   |
| GO response to epidermal growth factor       | 1 | 1 | 0.0683482 | 429 achaete-scute complex homolog 1 (Drosophila)                   |
| GO methylenetetrahydrofolate reductas        | 1 | 1 | 0.0683482 | 4524 5,10-methylenetetrahydrofolate reductase (NADPH)              |
| GO nitrilase activity                        | 1 | 1 | 0.0683482 | 4817 nitrilase 1                                                   |
| GO aortic valve morphogenesis                | 1 | 1 | 0.0683482 | 4851 Notch homolog 1, translocation-associated (Drosophila)        |
| GO endocardium morphogenesis                 | 1 | 1 | 0.0683482 | 4851 Notch homolog 1, translocation-associated (Drosophila)        |
| GO foregut morphogenesis                     | 1 | 1 | 0.0683482 | 4851 Notch homolog 1, translocation-associated (Drosophila)        |
| GO regulation of epithelial cell proliferati | 1 | 1 | 0.0683482 | 4851 Notch homolog 1, translocation-associated (Drosophila)        |
| GO regulation of somitogenesis               | 1 | 1 | 0.0683482 | 4851 Notch homolog 1, translocation-associated (Drosophila)        |
| GO generation of ovulation cycle rhythm      | 1 | 1 | 0.0683482 | 4889 neuropeptide Y receptor Y5                                    |
| GO 2'-5'-oligoadenylate synthetase activi    | 1 | 1 | 0.0683482 | 4939 2'-5'-oligoadenylate synthetase 2, 69/71kDa                   |
| GO relaxation of cardiac muscle              | 1 | 1 | 0.0683482 | 5025 purinergic receptor P2X, ligand-gated ion channel, 4          |
| GO protein amino acid hydroxylation          | 1 | 1 | 0.0683482 | 5053 phenylalanine hydroxylase                                     |
| GO tetrahydrobiopterin metabolic proce:      | 1 | 1 | 0.0683482 | 5053 phenylalanine hydroxylase                                     |

|                                             |   |   |           |                                                                             |
|---------------------------------------------|---|---|-----------|-----------------------------------------------------------------------------|
| GO tyrosine biosynthetic process            | 1 | 1 | 0.0683482 | 5053 phenylalanine hydroxylase                                              |
| GO interleukin-20 receptor binding          | 1 | 1 | 0.0683482 | 50604 interleukin 20                                                        |
| GO positive regulation of epidermal cell c  | 1 | 1 | 0.0683482 | 50604 interleukin 20                                                        |
| GO peptidylamidoglycolate lyase activity    | 1 | 1 | 0.0683482 | 5066 peptidylglycine alpha-amidating monooxygenase                          |
| GO peptidylglycine monooxygenase activ      | 1 | 1 | 0.0683482 | 5066 peptidylglycine alpha-amidating monooxygenase                          |
| GO carbohydrate response element bind       | 1 | 1 | 0.0683482 | 51085 MLX interacting protein-like                                          |
| GO glucose mediated signaling pathway       | 1 | 1 | 0.0683482 | 51085 MLX interacting protein-like                                          |
| GO negative regulation of oxidative phos    | 1 | 1 | 0.0683482 | 51085 MLX interacting protein-like                                          |
| GO spot adherens junction                   | 1 | 1 | 0.0683482 | 5239 phosphoglucomutase 5                                                   |
| GO 1-phosphatidylinositol-4-phosphate 3     | 1 | 1 | 0.0683482 | 5295 phosphoinositide-3-kinase, regulatory subunit 1 (alpha)                |
| GO branchiomic skeletal muscle develo       | 1 | 1 | 0.0683482 | 5307 paired-like homeodomain 1                                              |
| GO hydroxylysine biosynthetic process       | 1 | 1 | 0.0683482 | 5351 procollagen-lysine 1, 2-oxoglutarate 5-dioxygenase 1                   |
| GO granule cell precursor tangential mig    | 1 | 1 | 0.0683482 | 5362 plexin A2                                                              |
| GO melanin-concentrating hormone acti       | 1 | 1 | 0.0683482 | 5367 pro-melanin-concentrating hormone                                      |
| GO type 1 melanin-concentrating hormo       | 1 | 1 | 0.0683482 | 5367 pro-melanin-concentrating hormone                                      |
| GO negative regulation of translation in r  | 1 | 1 | 0.0683482 | 5371 promyelocytic leukemia                                                 |
| GO negative regulation of calcium-depen     | 1 | 1 | 0.0683482 | 53827 FXD domain containing ion transport regulator 5                       |
| GO lactosylceramide 4-alpha-galactosyltr    | 1 | 1 | 0.0683482 | 53947 alpha 1,4-galactosyltransferase                                       |
| GO thyroid stimulating hormone secretin     | 1 | 1 | 0.0683482 | 54361 wingless-type MMTV integration site family, member 4                  |
| GO cell fate commitment involved in the     | 1 | 1 | 0.0683482 | 5460 POU class 5 homeobox 1                                                 |
| GO positive regulation of catenin protein   | 1 | 1 | 0.0683482 | 5460 POU class 5 homeobox 1                                                 |
| GO regulation of canonical Wnt receptor     | 1 | 1 | 0.0683482 | 5460 POU class 5 homeobox 1                                                 |
| GO regulation of methylation-dependent      | 1 | 1 | 0.0683482 | 5460 POU class 5 homeobox 1                                                 |
| GO RNA 5'-end processing                    | 1 | 1 | 0.0683482 | 55124 piwi-like 2 (Drosophila)                                              |
| GO sphingoid biosynthetic process           | 1 | 1 | 0.0683482 | 55304 serine palmitoyltransferase, long chain base subunit 3                |
| GO alpha-N-acetylgalactosaminide alpha      | 1 | 1 | 0.0683482 | 55808 ST6 (alpha-N-acetyl-neuraminy-2,3-beta-galactosyl-1,3)-N-acetylgalact |
| GO barrier septum formation                 | 1 | 1 | 0.0683482 | 55909 bridging integrator 3                                                 |
| GO unidimensional cell growth               | 1 | 1 | 0.0683482 | 55909 bridging integrator 3                                                 |
| GO inorganic diphosphate transmembran       | 1 | 1 | 0.0683482 | 56172 ankylosis, progressive homolog (mouse)                                |
| GO asymmetric cell division                 | 1 | 1 | 0.0683482 | 56288 par-3 partitioning defective 3 homolog (C. elegans)                   |
| GO negative regulation of complement a      | 1 | 1 | 0.0683482 | 5648 mannan-binding lectin serine peptidase 1 (C4/C2 activating component)  |
| GO glycoprotein-N-acetylgalactosamine 3     | 1 | 1 | 0.0683482 | 56913 core 1 synthase, glycoprotein-N-acetylgalactosamine 3-beta-galactosyl |
| GO neuromedin U binding                     | 1 | 1 | 0.0683482 | 56923 neuromedin U receptor 2                                               |
| GO columnar/cuboidal epithelial cell dev    | 1 | 1 | 0.0683482 | 57619 shroom family member 3                                                |
| GO negative regulation of calcium ion tra   | 1 | 1 | 0.0683482 | 57620 stromal interaction molecule 2                                        |
| GO flavin-linked sulfhydryl oxidase activit | 1 | 1 | 0.0683482 | 5768 quiescin Q6 sulfhydryl oxidase 1                                       |



|    |                                          |   |   |           |                                                                                 |
|----|------------------------------------------|---|---|-----------|---------------------------------------------------------------------------------|
| GO | regulation of mast cell activation       | 1 | 1 | 0.0683482 | 5791 protein tyrosine phosphatase, receptor type, E                             |
| GO | cytotoxic T cell degranulation           | 1 | 1 | 0.0683482 | 5873 RAB27A, member RAS oncogene family                                         |
| GO | retinol transporter activity             | 1 | 1 | 0.0683482 | 5950 retinol binding protein 4, plasma                                          |
| GO | retinol transport                        | 1 | 1 | 0.0683482 | 5950 retinol binding protein 4, plasma                                          |
| GO | spermatogonial cell division             | 1 | 1 | 0.0683482 | 5950 retinol binding protein 4, plasma                                          |
| GO | response to cGMP                         | 1 | 1 | 0.0683482 | 5972 renin                                                                      |
| GO | regulation of germinal center formati    | 1 | 1 | 0.0683482 | 604 B-cell CLL/lymphoma 6                                                       |
| GO | regulation of memory T cell different    | 1 | 1 | 0.0683482 | 604 B-cell CLL/lymphoma 6                                                       |
| GO | complement binding                       | 1 | 1 | 0.0683482 | 629 complement factor B                                                         |
| GO | regulation of mitochondrion organiza     | 1 | 1 | 0.0683482 | 64083 golgi phosphoprotein 3 (coat-protein)                                     |
| GO | activation of immune response            | 1 | 1 | 0.0683482 | 64127 nucleotide-binding oligomerization domain containing 2                    |
| GO | cytokine production involved in immu     | 1 | 1 | 0.0683482 | 64127 nucleotide-binding oligomerization domain containing 2                    |
| GO | detection of muramyl dipeptide           | 1 | 1 | 0.0683482 | 64127 nucleotide-binding oligomerization domain containing 2                    |
| GO | immunoglobulin production during ir      | 1 | 1 | 0.0683482 | 64127 nucleotide-binding oligomerization domain containing 2                    |
| GO | macrophage inflammatory protein-1        | 1 | 1 | 0.0683482 | 64127 nucleotide-binding oligomerization domain containing 2                    |
| GO | muramyl dipeptide binding                | 1 | 1 | 0.0683482 | 64127 nucleotide-binding oligomerization domain containing 2                    |
| GO | negative regulation of interleukin-18    | 1 | 1 | 0.0683482 | 64127 nucleotide-binding oligomerization domain containing 2                    |
| GO | negative regulation of toll-like recept  | 1 | 1 | 0.0683482 | 64127 nucleotide-binding oligomerization domain containing 2                    |
| GO | glutamate:sodium symporter activity      | 1 | 1 | 0.0683482 | 6505 solute carrier family 1 (neuronal/epithelial high affinity glutamate trans |
| GO | branch elongation involved in ureteri    | 1 | 1 | 0.0683482 | 652 bone morphogenetic protein 4                                                |
| GO | bronchus development                     | 1 | 1 | 0.0683482 | 652 bone morphogenetic protein 4                                                |
| GO | bud dilation involved in lung branchir   | 1 | 1 | 0.0683482 | 652 bone morphogenetic protein 4                                                |
| GO | epithelial cell proliferation involved i | 1 | 1 | 0.0683482 | 652 bone morphogenetic protein 4                                                |
| GO | intermediate mesodermal cell differe     | 1 | 1 | 0.0683482 | 652 bone morphogenetic protein 4                                                |
| GO | mammary gland formation                  | 1 | 1 | 0.0683482 | 652 bone morphogenetic protein 4                                                |
| GO | negative regulation of branching invc    | 1 | 1 | 0.0683482 | 652 bone morphogenetic protein 4                                                |
| GO | negative regulation of glomerulus de     | 1 | 1 | 0.0683482 | 652 bone morphogenetic protein 4                                                |
| GO | trachea formation                        | 1 | 1 | 0.0683482 | 652 bone morphogenetic protein 4                                                |
| GO | creatine transporter activity            | 1 | 1 | 0.0683482 | 6535 solute carrier family 6 (neurotransmitter transporter, creatine), membe    |
| GO | creatine transport                       | 1 | 1 | 0.0683482 | 6535 solute carrier family 6 (neurotransmitter transporter, creatine), membe    |
| GO | creatine:sodium symporter activity       | 1 | 1 | 0.0683482 | 6535 solute carrier family 6 (neurotransmitter transporter, creatine), membe    |
| GO | channel inhibitor activity               | 1 | 1 | 0.0683482 | 6564 solute carrier family 15 (oligopeptide transporter), member 1              |
| GO | negative regulation of amino acid tra    | 1 | 1 | 0.0683482 | 6564 solute carrier family 15 (oligopeptide transporter), member 1              |
| GO | oligopeptide transporter activity        | 1 | 1 | 0.0683482 | 6564 solute carrier family 15 (oligopeptide transporter), member 1              |
| GO | antibiotic transporter activity          | 1 | 1 | 0.0683482 | 6565 solute carrier family 15 (H+/peptide transporter), member 2                |
| GO | antibiotic transport                     | 1 | 1 | 0.0683482 | 6565 solute carrier family 15 (H+/peptide transporter), member 2                |

|    |                                                                                   |   |   |           |                                                                  |
|----|-----------------------------------------------------------------------------------|---|---|-----------|------------------------------------------------------------------|
| GO | dipeptide transporter activity                                                    | 1 | 1 | 0.0683482 | 6565 solute carrier family 15 (H+/peptide transporter), member 2 |
| GO | dipeptide transport                                                               | 1 | 1 | 0.0683482 | 6565 solute carrier family 15 (H+/peptide transporter), member 2 |
| GO | high affinity oligopeptide transporter                                            | 1 | 1 | 0.0683482 | 6565 solute carrier family 15 (H+/peptide transporter), member 2 |
| GO | negative regulation of dopamine uptake                                            | 1 | 1 | 0.0683482 | 6622 synuclein, alpha (non A4 component of amyloid precursor)    |
| GO | negative regulation of monooxygenase activity                                     | 1 | 1 | 0.0683482 | 6622 synuclein, alpha (non A4 component of amyloid precursor)    |
| GO | negative regulation of norepinephrine transport                                   | 1 | 1 | 0.0683482 | 6622 synuclein, alpha (non A4 component of amyloid precursor)    |
| GO | negative regulation of serotonin uptake                                           | 1 | 1 | 0.0683482 | 6622 synuclein, alpha (non A4 component of amyloid precursor)    |
| GO | negative regulation of thrombin receptor activity                                 | 1 | 1 | 0.0683482 | 6622 synuclein, alpha (non A4 component of amyloid precursor)    |
| GO | neutral lipid metabolic process                                                   | 1 | 1 | 0.0683482 | 6622 synuclein, alpha (non A4 component of amyloid precursor)    |
| GO | phospholipase D inhibitor activity                                                | 1 | 1 | 0.0683482 | 6622 synuclein, alpha (non A4 component of amyloid precursor)    |
| GO | regulation of acyl-CoA biosynthetic process                                       | 1 | 1 | 0.0683482 | 6622 synuclein, alpha (non A4 component of amyloid precursor)    |
| GO | regulation of phospholipase activity                                              | 1 | 1 | 0.0683482 | 6622 synuclein, alpha (non A4 component of amyloid precursor)    |
| GO | regulation of synaptic vesicle priming                                            | 1 | 1 | 0.0683482 | 6812 syntaxin binding protein 1                                  |
| GO | thromboxane-A synthase activity                                                   | 1 | 1 | 0.0683482 | 6916 thromboxane A synthase 1 (platelet)                         |
| GO | respiratory burst involved in inflammation                                        | 1 | 1 | 0.0683482 | 7001 peroxiredoxin 2                                             |
| GO | radial pattern formation                                                          | 1 | 1 | 0.0683482 | 7026 nuclear receptor subfamily 2, group F, member 2             |
| GO | definitive erythrocyte differentiation                                            | 1 | 1 | 0.0683482 | 7049 transforming growth factor, beta receptor III               |
| GO | response to luteinizing hormone stimulation                                       | 1 | 1 | 0.0683482 | 7049 transforming growth factor, beta receptor III               |
| GO | transforming growth factor beta receptor signaling pathway                        | 1 | 1 | 0.0683482 | 7049 transforming growth factor, beta receptor III               |
| GO | cellular response to bacterial lipopeptide                                        | 1 | 1 | 0.0683482 | 7097 toll-like receptor 2                                        |
| GO | chloramphenicol transport                                                         | 1 | 1 | 0.0683482 | 7097 toll-like receptor 2                                        |
| GO | triacylated lipopeptide binding                                                   | 1 | 1 | 0.0683482 | 7097 toll-like receptor 2                                        |
| GO | detection of virus                                                                | 1 | 1 | 0.0683482 | 7098 toll-like receptor 3                                        |
| GO | detection of fungus                                                               | 1 | 1 | 0.0683482 | 7099 toll-like receptor 4                                        |
| GO | innate immune response-activating signaling pathway                               | 1 | 1 | 0.0683482 | 7099 toll-like receptor 4                                        |
| GO | intestinal epithelial structure maintenance                                       | 1 | 1 | 0.0683482 | 7099 toll-like receptor 4                                        |
| GO | negative regulation of interleukin-17 production                                  | 1 | 1 | 0.0683482 | 7099 toll-like receptor 4                                        |
| GO | negative regulation of interleukin-23 production                                  | 1 | 1 | 0.0683482 | 7099 toll-like receptor 4                                        |
| GO | positive regulation of interleukin-1 production                                   | 1 | 1 | 0.0683482 | 7099 toll-like receptor 4                                        |
| GO | positive regulation of nucleotide-binding site-leucine-rich repeat domain binding | 1 | 1 | 0.0683482 | 7099 toll-like receptor 4                                        |
| GO | positive regulation of nucleotide-binding site-leucine-rich repeat domain binding | 1 | 1 | 0.0683482 | 7099 toll-like receptor 4                                        |
| GO | production of nitric oxide involved in signaling pathway                          | 1 | 1 | 0.0683482 | 7099 toll-like receptor 4                                        |
| GO | positive regulation of type IIa hypersensitivity                                  | 1 | 1 | 0.0683482 | 718 complement component 3                                       |
| GO | ionotropic glutamate receptor complex assembly                                    | 1 | 1 | 0.0683482 | 729993 shisa homolog 9 ( <i>Xenopus laevis</i> )                 |
| GO | negative regulation of mesenchymal cell proliferation                             | 1 | 1 | 0.0683482 | 7474 wingless-type MMTV integration site family, member 5A       |
| GO | positive regulation of cytokine secretion                                         | 1 | 1 | 0.0683482 | 7474 wingless-type MMTV integration site family, member 5A       |

|                                            |   |   |           |                                                                             |
|--------------------------------------------|---|---|-----------|-----------------------------------------------------------------------------|
| GO receptor tyrosine kinase-like orphan    | 1 | 1 | 0.0683482 | 7474 wingless-type MMTV integration site family, member 5A                  |
| GO positive regulation of nuclear-transcr  | 1 | 1 | 0.0683482 | 7538 zinc finger protein 36, C3H type, homolog (mouse)                      |
| GO negative regulation of nuclease activi  | 1 | 1 | 0.0683482 | 79661 nei endonuclease VIII-like 1 (E. coli)                                |
| GO oxidoreductase activity, acting on the  | 1 | 1 | 0.0683482 | 79802 HHIP-like 2                                                           |
| GO calcitonin binding                      | 1 | 1 | 0.0683482 | 799 calcitonin receptor                                                     |
| GO semicircular canal morphogenesis        | 1 | 1 | 0.0683482 | 8013 nuclear receptor subfamily 4, group A, member 3                        |
| GO vestibular reflex                       | 1 | 1 | 0.0683482 | 8013 nuclear receptor subfamily 4, group A, member 3                        |
| GO hydroxypyruvate isomerase activity      | 1 | 1 | 0.0683482 | 81888 hydroxypyruvate isomerase homolog (E. coli)                           |
| GO calcium-dependent cysteine-type enc     | 1 | 1 | 0.0683482 | 831 calpastatin                                                             |
| GO CMP-N-acetylneuraminate monooxyg        | 1 | 1 | 0.0683482 | 8418 cytidine monophosphate-N-acetylneuraminic acid hydroxylase (CMP-N      |
| GO patched ligand maturation               | 1 | 1 | 0.0683482 | 84976 dispatched homolog 1 (Drosophila)                                     |
| GO negative regulation of skeletal muscl   | 1 | 1 | 0.0683482 | 8531 cold shock domain protein A                                            |
| GO ribonuclease T2 activity                | 1 | 1 | 0.0683482 | 8635 ribonuclease T2                                                        |
| GO BMP signaling pathway involved in sp    | 1 | 1 | 0.0683482 | 8646 chordin                                                                |
| GO floor plate development                 | 1 | 1 | 0.0683482 | 8646 chordin                                                                |
| GO galactosylgalactosylglucosylceramide    | 1 | 1 | 0.0683482 | 8706 beta-1,3-N-acetylgalactosaminyltransferase 1 (globoside blood group)   |
| GO positive regulation of protein oligom   | 1 | 1 | 0.0683482 | 885 cholecystokinin                                                         |
| GO phosphatidic acid binding               | 1 | 1 | 0.0683482 | 91404 SEC14 and spectrin domains 1                                          |
| GO negative regulation of Golgi to plasm   | 1 | 1 | 0.0683482 | 91461 protein kinase domain containing, cytoplasmic homolog (mouse)         |
| GO trans-Golgi network transport vesicle   | 1 | 1 | 0.0683482 | 9182 Ras association (RalGDS/AF-6) domain family (N-terminal) member 9      |
| GO pyruvate secondary active transmem      | 1 | 1 | 0.0683482 | 9194 solute carrier family 16, member 7 (monocarboxylic acid transporter 2) |
| GO pyruvate transport                      | 1 | 1 | 0.0683482 | 9194 solute carrier family 16, member 7 (monocarboxylic acid transporter 2) |
| GO opsonin receptor activity               | 1 | 1 | 0.0683482 | 929 CD14 molecule                                                           |
| GO nicotinate phosphoribosyltransferase    | 1 | 1 | 0.0683482 | 93100 nicotinate phosphoribosyltransferase domain containing 1              |
| GO phosphorus-oxygen lyase activity        | 1 | 1 | 0.0683482 | 952 CD38 molecule                                                           |
| GO glucose 1-dehydrogenase activity        | 1 | 1 | 0.0683482 | 9563 hexose-6-phosphate dehydrogenase (glucose 1-dehydrogenase)             |
| GO guanine deaminase activity              | 1 | 1 | 0.0683482 | 9615 guanine deaminase                                                      |
| GO detection of hormone stimulus           | 1 | 1 | 0.0683482 | 9619 ATP-binding cassette, sub-family G (WHITE), member 1                   |
| GO glycoprotein transporter activity       | 1 | 1 | 0.0683482 | 9619 ATP-binding cassette, sub-family G (WHITE), member 1                   |
| GO glycoprotein transport                  | 1 | 1 | 0.0683482 | 9619 ATP-binding cassette, sub-family G (WHITE), member 1                   |
| GO regulation of cholesterol esterificatio | 1 | 1 | 0.0683482 | 9619 ATP-binding cassette, sub-family G (WHITE), member 1                   |
| GO sterol-transporting ATPase activity     | 1 | 1 | 0.0683482 | 9619 ATP-binding cassette, sub-family G (WHITE), member 1                   |
| GO regulation of striated muscle cell diff | 1 | 1 | 0.0683482 | 9734 histone deacetylase 9                                                  |
| GO rhombomere 6 development                | 1 | 1 | 0.0683482 | 9935 v-maf musculoaponeurotic fibrosarcoma oncogene homolog B (avian)       |
| GO cytokine metabolic process              | 1 | 1 | 0.0683482 | 9966 tumor necrosis factor (ligand) superfamily, member 15                  |
| GO meiotic cohesin complex                 | 1 | 1 | 0.0683482 | 9985 REC8 homolog (yeast)                                                   |

|    |                                        |    |     |           |                                                                              |
|----|----------------------------------------|----|-----|-----------|------------------------------------------------------------------------------|
| GO | positive regulation of I-kappaB kinase | 12 | 109 | 0.0686347 | 10769 polo-like kinase 2 (Drosophila)                                        |
| GO | positive regulation of I-kappaB kinase | 12 | 109 | 0.0686347 | 1902 lysophosphatidic acid receptor 1                                        |
| GO | positive regulation of I-kappaB kinase | 12 | 109 | 0.0686347 | 5071 Parkinson disease (autosomal recessive, juvenile) 2, parkin             |
| GO | positive regulation of I-kappaB kinase | 12 | 109 | 0.0686347 | 51523 CXXC finger 5                                                          |
| GO | positive regulation of I-kappaB kinase | 12 | 109 | 0.0686347 | 64127 nucleotide-binding oligomerization domain containing 2                 |
| GO | positive regulation of I-kappaB kinase | 12 | 109 | 0.0686347 | 684 bone marrow stromal cell antigen 2                                       |
| GO | positive regulation of I-kappaB kinase | 12 | 109 | 0.0686347 | 7098 toll-like receptor 3                                                    |
| GO | positive regulation of I-kappaB kinase | 12 | 109 | 0.0686347 | 7099 toll-like receptor 4                                                    |
| GO | positive regulation of I-kappaB kinase | 12 | 109 | 0.0686347 | 79971 wntless homolog (Drosophila)                                           |
| GO | positive regulation of I-kappaB kinase | 12 | 109 | 0.0686347 | 80833 apolipoprotein L, 3                                                    |
| GO | positive regulation of I-kappaB kinase | 12 | 109 | 0.0686347 | 834 caspase 1, apoptosis-related cysteine peptidase (interleukin 1, beta, co |
| GO | positive regulation of I-kappaB kinase | 12 | 109 | 0.0686347 | 8600 tumor necrosis factor (ligand) superfamily, member 11                   |
| GO | cell cortex                            | 9  | 75  | 0.0691174 | 2263 fibroblast growth factor receptor 2                                     |
| GO | cell cortex                            | 9  | 75  | 0.0691174 | 23048 formin binding protein 1                                               |
| GO | cell cortex                            | 9  | 75  | 0.0691174 | 3709 inositol 1,4,5-triphosphate receptor, type 2                            |
| GO | cell cortex                            | 9  | 75  | 0.0691174 | 53405 chloride intracellular channel 5                                       |
| GO | cell cortex                            | 9  | 75  | 0.0691174 | 56288 par-3 partitioning defective 3 homolog (C. elegans)                    |
| GO | cell cortex                            | 9  | 75  | 0.0691174 | 6622 synuclein, alpha (non A4 component of amyloid precursor)                |
| GO | cell cortex                            | 9  | 75  | 0.0691174 | 6710 spectrin, beta, erythrocytic                                            |
| GO | cell cortex                            | 9  | 75  | 0.0691174 | 85477 scinderin                                                              |
| GO | cell cortex                            | 9  | 75  | 0.0691174 | 9595 cytohesin 1 interacting protein                                         |
| GO | calcium-mediated signaling             | 5  | 33  | 0.0714159 | 10231 regulator of calcineurin 2                                             |
| GO | calcium-mediated signaling             | 5  | 33  | 0.0714159 | 1906 endothelin 1                                                            |
| GO | calcium-mediated signaling             | 5  | 33  | 0.0714159 | 222545 G protein-coupled receptor, family C, group 6, member A               |
| GO | calcium-mediated signaling             | 5  | 33  | 0.0714159 | 2911 glutamate receptor, metabotropic 1                                      |
| GO | calcium-mediated signaling             | 5  | 33  | 0.0714159 | 56923 neuromedin U receptor 2                                                |
| GO | learning or memory                     | 5  | 33  | 0.0714159 | 1958 early growth response 1                                                 |
| GO | learning or memory                     | 5  | 33  | 0.0714159 | 1959 early growth response 2                                                 |
| GO | learning or memory                     | 5  | 33  | 0.0714159 | 2182 acyl-CoA synthetase long-chain family member 4                          |
| GO | learning or memory                     | 5  | 33  | 0.0714159 | 412 steroid sulfatase (microsomal), isozyme S                                |
| GO | learning or memory                     | 5  | 33  | 0.0714159 | 627 brain-derived neurotrophic factor                                        |
| GO | lipid metabolic process                | 20 | 206 | 0.0714555 | 11343 monoglyceride lipase                                                   |
| GO | lipid metabolic process                | 20 | 206 | 0.0714555 | 166929 sphingomyelin synthase 2                                              |
| GO | lipid metabolic process                | 20 | 206 | 0.0714555 | 2182 acyl-CoA synthetase long-chain family member 4                          |
| GO | lipid metabolic process                | 20 | 206 | 0.0714555 | 23780 apolipoprotein L, 2                                                    |
| GO | lipid metabolic process                | 20 | 206 | 0.0714555 | 256987 serine incorporator 5                                                 |

|                             |    |     |           |                                                                                      |
|-----------------------------|----|-----|-----------|--------------------------------------------------------------------------------------|
| GO lipid metabolic process  | 20 | 206 | 0.0714555 | 35 acyl-Coenzyme A dehydrogenase, C-2 to C-3 short chain                             |
| GO lipid metabolic process  | 20 | 206 | 0.0714555 | 3949 low density lipoprotein receptor                                                |
| GO lipid metabolic process  | 20 | 206 | 0.0714555 | 498 ATP synthase, H <sup>+</sup> transporting, mitochondrial F1 complex, alpha subun |
| GO lipid metabolic process  | 20 | 206 | 0.0714555 | 51703 acyl-CoA synthetase long-chain family member 5                                 |
| GO lipid metabolic process  | 20 | 206 | 0.0714555 | 5244 ATP-binding cassette, sub-family B (MDR/TAP), member 4                          |
| GO lipid metabolic process  | 20 | 206 | 0.0714555 | 5346 perilipin 1                                                                     |
| GO lipid metabolic process  | 20 | 206 | 0.0714555 | 5465 peroxisome proliferator-activated receptor alpha                                |
| GO lipid metabolic process  | 20 | 206 | 0.0714555 | 55268 enoyl Coenzyme A hydratase domain containing 2                                 |
| GO lipid metabolic process  | 20 | 206 | 0.0714555 | 56261 glycerophosphocholine phosphodiesterase GDE1 homolog ( <i>S. cerevisia</i>     |
| GO lipid metabolic process  | 20 | 206 | 0.0714555 | 5742 prostaglandin-endoperoxide synthase 1 (prostaglandin G/H synthase a             |
| GO lipid metabolic process  | 20 | 206 | 0.0714555 | 6489 ST8 alpha-N-acetyl-neuraminide alpha-2,8-sialyltransferase 1                    |
| GO lipid metabolic process  | 20 | 206 | 0.0714555 | 7026 nuclear receptor subfamily 2, group F, member 2                                 |
| GO lipid metabolic process  | 20 | 206 | 0.0714555 | 7069 thyroid hormone responsive (SPOT14 homolog, rat)                                |
| GO lipid metabolic process  | 20 | 206 | 0.0714555 | 7941 phospholipase A2, group VII (platelet-activating factor acetylhydrolase,        |
| GO lipid metabolic process  | 20 | 206 | 0.0714555 | 81544 glycerophosphodiester phosphodiesterase domain containing 5                    |
| GO chloride channel complex | 7  | 54  | 0.073533  | 1080 cystic fibrosis transmembrane conductance regulator (ATP-binding cas            |
| GO chloride channel complex | 7  | 54  | 0.073533  | 1193 chloride intracellular channel 2                                                |
| GO chloride channel complex | 7  | 54  | 0.073533  | 2564 gamma-aminobutyric acid (GABA) A receptor, epsilon                              |
| GO chloride channel complex | 7  | 54  | 0.073533  | 266675 bestrophin 4                                                                  |
| GO chloride channel complex | 7  | 54  | 0.073533  | 53405 chloride intracellular channel 5                                               |
| GO chloride channel complex | 7  | 54  | 0.073533  | 5349 FX1D domain containing ion transport regulator 3                                |
| GO chloride channel complex | 7  | 54  | 0.073533  | 63982 anoctamin 3                                                                    |
| GO oxidation reduction      | 44 | 515 | 0.0741864 | 10170 dehydrogenase/reductase (SDR family) member 9                                  |
| GO oxidation reduction      | 44 | 515 | 0.0741864 | 10826 chromosome 5 open reading frame 4                                              |
| GO oxidation reduction      | 44 | 515 | 0.0741864 | 112724 retinol dehydrogenase 13 (all-trans/9-cis)                                    |
| GO oxidation reduction      | 44 | 515 | 0.0741864 | 123099 degenerative spermatocyte homolog 2, lipid desaturase ( <i>Drosophila</i> )   |
| GO oxidation reduction      | 44 | 515 | 0.0741864 | 124 alcohol dehydrogenase 1A (class I), alpha polypeptide                            |
| GO oxidation reduction      | 44 | 515 | 0.0741864 | 125 alcohol dehydrogenase 1B (class I), beta polypeptide                             |
| GO oxidation reduction      | 44 | 515 | 0.0741864 | 1558 cytochrome P450, family 2, subfamily C, polypeptide 8                           |
| GO oxidation reduction      | 44 | 515 | 0.0741864 | 1559 cytochrome P450, family 2, subfamily C, polypeptide 9                           |
| GO oxidation reduction      | 44 | 515 | 0.0741864 | 1571 cytochrome P450, family 2, subfamily E, polypeptide 1                           |
| GO oxidation reduction      | 44 | 515 | 0.0741864 | 157506 retinol dehydrogenase 10 (all-trans)                                          |
| GO oxidation reduction      | 44 | 515 | 0.0741864 | 195814 short chain dehydrogenase/reductase family 16C, member 5                      |
| GO oxidation reduction      | 44 | 515 | 0.0741864 | 2153 coagulation factor V (proaccelerin, labile factor)                              |
| GO oxidation reduction      | 44 | 515 | 0.0741864 | 23081 lysine (K)-specific demethylase 4C                                             |
| GO oxidation reduction      | 44 | 515 | 0.0741864 | 240 arachidonate 5-lipoxygenase                                                      |

|                                     |    |     |           |                                                                               |
|-------------------------------------|----|-----|-----------|-------------------------------------------------------------------------------|
| GO oxidation reduction              | 44 | 515 | 0.0741864 | 254295 phytanoyl-CoA dioxygenase domain containing 1                          |
| GO oxidation reduction              | 44 | 515 | 0.0741864 | 27035 NADPH oxidase 1                                                         |
| GO oxidation reduction              | 44 | 515 | 0.0741864 | 316 aldehyde oxidase 1                                                        |
| GO oxidation reduction              | 44 | 515 | 0.0741864 | 3294 hydroxysteroid (17-beta) dehydrogenase 2                                 |
| GO oxidation reduction              | 44 | 515 | 0.0741864 | 345275 hydroxysteroid (17-beta) dehydrogenase 13                              |
| GO oxidation reduction              | 44 | 515 | 0.0741864 | 35 acyl-Coenzyme A dehydrogenase, C-2 to C-3 short chain                      |
| GO oxidation reduction              | 44 | 515 | 0.0741864 | 4015 lysyl oxidase                                                            |
| GO oxidation reduction              | 44 | 515 | 0.0741864 | 4128 monoamine oxidase A                                                      |
| GO oxidation reduction              | 44 | 515 | 0.0741864 | 4129 monoamine oxidase B                                                      |
| GO oxidation reduction              | 44 | 515 | 0.0741864 | 4524 5,10-methylenetetrahydrofolate reductase (NADPH)                         |
| GO oxidation reduction              | 44 | 515 | 0.0741864 | 4842 nitric oxide synthase 1 (neuronal)                                       |
| GO oxidation reduction              | 44 | 515 | 0.0741864 | 5053 phenylalanine hydroxylase                                                |
| GO oxidation reduction              | 44 | 515 | 0.0741864 | 5066 peptidylglycine alpha-amidating monooxygenase                            |
| GO oxidation reduction              | 44 | 515 | 0.0741864 | 5351 procollagen-lysine 1, 2-oxoglutarate 5-dioxygenase 1                     |
| GO oxidation reduction              | 44 | 515 | 0.0741864 | 54681 prolyl 4-hydroxylase, transmembrane (endoplasmic reticulum)             |
| GO oxidation reduction              | 44 | 515 | 0.0741864 | 55693 lysine (K)-specific demethylase 4D                                      |
| GO oxidation reduction              | 44 | 515 | 0.0741864 | 5742 prostaglandin-endoperoxide synthase 1 (prostaglandin G/H synthase and    |
| GO oxidation reduction              | 44 | 515 | 0.0741864 | 5768 quiescin Q6 sulfhydryl oxidase 1                                         |
| GO oxidation reduction              | 44 | 515 | 0.0741864 | 59344 arachidonate lipoxygenase 3                                             |
| GO oxidation reduction              | 44 | 515 | 0.0741864 | 622 3-hydroxybutyrate dehydrogenase, type 1                                   |
| GO oxidation reduction              | 44 | 515 | 0.0741864 | 64359 nucleoredoxin                                                           |
| GO oxidation reduction              | 44 | 515 | 0.0741864 | 6916 thromboxane A synthase 1 (platelet)                                      |
| GO oxidation reduction              | 44 | 515 | 0.0741864 | 7001 peroxiredoxin 2                                                          |
| GO oxidation reduction              | 44 | 515 | 0.0741864 | 7404 ubiquitously transcribed tetratricopeptide repeat gene, Y-linked         |
| GO oxidation reduction              | 44 | 515 | 0.0741864 | 79689 STEAP family member 4                                                   |
| GO oxidation reduction              | 44 | 515 | 0.0741864 | 84171 lysyl oxidase-like 4                                                    |
| GO oxidation reduction              | 44 | 515 | 0.0741864 | 8418 cytidine monophosphate-N-acetylneuraminic acid hydroxylase (CMP-N        |
| GO oxidation reduction              | 44 | 515 | 0.0741864 | 84795 pyridine nucleotide-disulphide oxidoreductase domain 2                  |
| GO oxidation reduction              | 44 | 515 | 0.0741864 | 8514 potassium voltage-gated channel, shaker-related subfamily, beta mem      |
| GO oxidation reduction              | 44 | 515 | 0.0741864 | 9563 hexose-6-phosphate dehydrogenase (glucose 1-dehydrogenase)               |
| GO ubiquitin protein ligase binding | 6  | 44  | 0.0772264 | 10221 tribbles homolog 1 (Drosophila)                                         |
| GO ubiquitin protein ligase binding | 6  | 44  | 0.0772264 | 28951 tribbles homolog 2 (Drosophila)                                         |
| GO ubiquitin protein ligase binding | 6  | 44  | 0.0772264 | 4087 SMAD family member 2                                                     |
| GO ubiquitin protein ligase binding | 6  | 44  | 0.0772264 | 4792 nuclear factor of kappa light polypeptide gene enhancer in B-cells inhib |
| GO ubiquitin protein ligase binding | 6  | 44  | 0.0772264 | 5371 promyelocytic leukemia                                                   |
| GO ubiquitin protein ligase binding | 6  | 44  | 0.0772264 | 91 activin A receptor, type IB                                                |

|                                           |   |    |           |                                                               |
|-------------------------------------------|---|----|-----------|---------------------------------------------------------------|
| GO drug binding                           | 6 | 44 | 0.0772264 | 154 adrenergic, beta-2-, receptor, surface                    |
| GO drug binding                           | 6 | 44 | 0.0772264 | 1559 cytochrome P450, family 2, subfamily C, polypeptide 9    |
| GO drug binding                           | 6 | 44 | 0.0772264 | 1813 dopamine receptor D2                                     |
| GO drug binding                           | 6 | 44 | 0.0772264 | 1815 dopamine receptor D4                                     |
| GO drug binding                           | 6 | 44 | 0.0772264 | 5025 purinergic receptor P2X, ligand-gated ion channel, 4     |
| GO drug binding                           | 6 | 44 | 0.0772264 | 5465 peroxisome proliferator-activated receptor alpha         |
| GO hydrolase activity, acting on glycosyl | 6 | 44 | 0.0772264 | 2517 fucosidase, alpha-L- 1, tissue                           |
| GO hydrolase activity, acting on glycosyl | 6 | 44 | 0.0772264 | 3373 hyaluronoglucosaminidase 1                               |
| GO hydrolase activity, acting on glycosyl | 6 | 44 | 0.0772264 | 4121 mannosidase, alpha, class 1A, member 1                   |
| GO hydrolase activity, acting on glycosyl | 6 | 44 | 0.0772264 | 57134 mannosidase, alpha, class 1C, member 1                  |
| GO hydrolase activity, acting on glycosyl | 6 | 44 | 0.0772264 | 79661 nei endonuclease VIII-like 1 (E. coli)                  |
| GO hydrolase activity, acting on glycosyl | 6 | 44 | 0.0772264 | 952 CD38 molecule                                             |
| GO response to interleukin-1              | 4 | 24 | 0.0773606 | 11213 interleukin-1 receptor-associated kinase 3              |
| GO response to interleukin-1              | 4 | 24 | 0.0773606 | 5122 proprotein convertase subtilisin/kexin type 1            |
| GO response to interleukin-1              | 4 | 24 | 0.0773606 | 6622 synuclein, alpha (non A4 component of amyloid precursor) |
| GO response to interleukin-1              | 4 | 24 | 0.0773606 | 952 CD38 molecule                                             |
| GO defense response to Gram-positive b    | 4 | 24 | 0.0773606 | 3569 interleukin 6 (interferon, beta 2)                       |
| GO defense response to Gram-positive b    | 4 | 24 | 0.0773606 | 3570 interleukin 6 receptor                                   |
| GO defense response to Gram-positive b    | 4 | 24 | 0.0773606 | 64127 nucleotide-binding oligomerization domain containing 2  |
| GO defense response to Gram-positive b    | 4 | 24 | 0.0773606 | 7097 toll-like receptor 2                                     |
| GO response to metal ion                  | 2 | 7  | 0.0778892 | 10397 N-myc downstream regulated 1                            |
| GO response to metal ion                  | 2 | 7  | 0.0778892 | 9633 metallothionein-like 5, testis-specific (tesmin)         |
| GO positive regulation of ossification    | 2 | 7  | 0.0778892 | 10766 transducer of ERBB2, 2                                  |
| GO positive regulation of ossification    | 2 | 7  | 0.0778892 | 652 bone morphogenetic protein 4                              |
| GO chitin catabolic process               | 2 | 7  | 0.0778892 | 1117 chitinase 3-like 2                                       |
| GO chitin catabolic process               | 2 | 7  | 0.0778892 | 5016 oviductal glycoprotein 1, 120kDa                         |
| GO chitinase activity                     | 2 | 7  | 0.0778892 | 1117 chitinase 3-like 2                                       |
| GO chitinase activity                     | 2 | 7  | 0.0778892 | 5016 oviductal glycoprotein 1, 120kDa                         |
| GO retinoic acid binding                  | 2 | 7  | 0.0778892 | 1382 cellular retinoic acid binding protein 2                 |
| GO retinoic acid binding                  | 2 | 7  | 0.0778892 | 7026 nuclear receptor subfamily 2, group F, member 2          |
| GO axon regeneration                      | 2 | 7  | 0.0778892 | 1462 versican                                                 |
| GO axon regeneration                      | 2 | 7  | 0.0778892 | 6256 retinoid X receptor, alpha                               |
| GO fibril organization                    | 2 | 7  | 0.0778892 | 1471 cystatin C                                               |
| GO fibril organization                    | 2 | 7  | 0.0778892 | 4586 mucin 5AC, oligomeric mucus/gel-forming                  |
| GO dopamine binding                       | 2 | 7  | 0.0778892 | 154 adrenergic, beta-2-, receptor, surface                    |
| GO dopamine binding                       | 2 | 7  | 0.0778892 | 1815 dopamine receptor D4                                     |

|                                                             |   |   |           |                                                                     |
|-------------------------------------------------------------|---|---|-----------|---------------------------------------------------------------------|
| GO negative regulation of peptidyl-serine                   | 2 | 7 | 0.0778892 | 154043 CNKSR family member 3                                        |
| GO negative regulation of peptidyl-serine                   | 2 | 7 | 0.0778892 | 51085 MLX interacting protein-like                                  |
| GO exogenous drug catabolic process                         | 2 | 7 | 0.0778892 | 1558 cytochrome P450, family 2, subfamily C, polypeptide 8          |
| GO exogenous drug catabolic process                         | 2 | 7 | 0.0778892 | 1559 cytochrome P450, family 2, subfamily C, polypeptide 9          |
| GO negative regulation of cAMP biosynthesis                 | 2 | 7 | 0.0778892 | 1815 dopamine receptor D4                                           |
| GO negative regulation of cAMP biosynthesis                 | 2 | 7 | 0.0778892 | 1906 endothelin 1                                                   |
| GO smooth muscle cell differentiation                       | 2 | 7 | 0.0778892 | 183 angiotensinogen (serpin peptidase inhibitor, clade A, member 8) |
| GO smooth muscle cell differentiation                       | 2 | 7 | 0.0778892 | 54361 wingless-type MMTV integration site family, member 4          |
| GO detection of light stimulus involved in circadian rhythm | 2 | 7 | 0.0778892 | 195814 short chain dehydrogenase/reductase family 16C, member 5     |
| GO detection of light stimulus involved in circadian rhythm | 2 | 7 | 0.0778892 | 5950 retinol binding protein 4, plasma                              |
| GO bHLH transcription factor binding                        | 2 | 7 | 0.0778892 | 2033 E1A binding protein p300                                       |
| GO bHLH transcription factor binding                        | 2 | 7 | 0.0778892 | 429 achaete-scute complex homolog 1 (Drosophila)                    |
| GO embryonic process involved in female sex determination   | 2 | 7 | 0.0778892 | 2182 acyl-CoA synthetase long-chain family member 4                 |
| GO embryonic process involved in female sex determination   | 2 | 7 | 0.0778892 | 3726 jun B proto-oncogene                                           |
| GO central nervous system neuron development                | 2 | 7 | 0.0778892 | 2290 forkhead box G1                                                |
| GO central nervous system neuron development                | 2 | 7 | 0.0778892 | 429 achaete-scute complex homolog 1 (Drosophila)                    |
| GO negative regulation of T cell receptor signaling pathway | 2 | 7 | 0.0778892 | 26191 protein tyrosine phosphatase, non-receptor type 22 (lymphoid) |
| GO negative regulation of T cell receptor signaling pathway | 2 | 7 | 0.0778892 | 53347 ubiquitin associated and SH3 domain containing, A             |
| GO cellular homeostasis                                     | 2 | 7 | 0.0778892 | 358 aquaporin 1 (Colton blood group)                                |
| GO cellular homeostasis                                     | 2 | 7 | 0.0778892 | 4170 myeloid cell leukemia sequence 1 (BCL2-related)                |
| GO pancreatic juice secretion                               | 2 | 7 | 0.0778892 | 358 aquaporin 1 (Colton blood group)                                |
| GO pancreatic juice secretion                               | 2 | 7 | 0.0778892 | 6343 secretin                                                       |
| GO positive regulation of interleukin-12 production         | 2 | 7 | 0.0778892 | 3659 interferon regulatory factor 1                                 |
| GO positive regulation of interleukin-12 production         | 2 | 7 | 0.0778892 | 7099 toll-like receptor 4                                           |
| GO wound healing, spreading of epidermal cells              | 2 | 7 | 0.0778892 | 3678 integrin, alpha 5 (fibronectin receptor, alpha polypeptide)    |
| GO wound healing, spreading of epidermal cells              | 2 | 7 | 0.0778892 | 94 activin A receptor type II-like 1                                |
| GO positive regulation of Notch signaling                   | 2 | 7 | 0.0778892 | 3815 v-kit Hardy-Zuckerman 4 feline sarcoma viral oncogene homolog  |
| GO positive regulation of Notch signaling                   | 2 | 7 | 0.0778892 | 429 achaete-scute complex homolog 1 (Drosophila)                    |
| GO response to selenium ion                                 | 2 | 7 | 0.0778892 | 4129 monoamine oxidase B                                            |
| GO response to selenium ion                                 | 2 | 7 | 0.0778892 | 6256 retinoid X receptor, alpha                                     |
| GO negative regulation of myoblast differentiation          | 2 | 7 | 0.0778892 | 4851 Notch homolog 1, translocation-associated (Drosophila)         |
| GO negative regulation of myoblast differentiation          | 2 | 7 | 0.0778892 | 652 bone morphogenetic protein 4                                    |
| GO negative regulation of synaptic transmission             | 2 | 7 | 0.0778892 | 4889 neuropeptide Y receptor Y5                                     |
| GO negative regulation of synaptic transmission             | 2 | 7 | 0.0778892 | 6812 syntaxin binding protein 1                                     |
| GO aggresome                                                | 2 | 7 | 0.0778892 | 5071 Parkinson disease (autosomal recessive, juvenile) 2, parkin    |
| GO aggresome                                                | 2 | 7 | 0.0778892 | 79092 caspase recruitment domain family, member 14                  |



|    |                                        |   |    |           |                                                                               |
|----|----------------------------------------|---|----|-----------|-------------------------------------------------------------------------------|
| GO | 3',5'-cyclic-GMP phosphodiesterase a   | 2 | 7  | 0.0778892 | 5152 phosphodiesterase 9A                                                     |
| GO | 3',5'-cyclic-GMP phosphodiesterase a   | 2 | 7  | 0.0778892 | 5158 phosphodiesterase 6B, cGMP-specific, rod, beta                           |
| GO | phototransduction, visible light       | 2 | 7  | 0.0778892 | 5158 phosphodiesterase 6B, cGMP-specific, rod, beta                           |
| GO | phototransduction, visible light       | 2 | 7  | 0.0778892 | 6101 retinitis pigmentosa 1 (autosomal dominant)                              |
| GO | chromatoid body                        | 2 | 7  | 0.0778892 | 55124 piwi-like 2 (Drosophila)                                                |
| GO | chromatoid body                        | 2 | 7  | 0.0778892 | 9271 piwi-like 1 (Drosophila)                                                 |
| GO | CARD domain binding                    | 2 | 7  | 0.0778892 | 64127 nucleotide-binding oligomerization domain containing 2                  |
| GO | CARD domain binding                    | 2 | 7  | 0.0778892 | 79092 caspase recruitment domain family, member 14                            |
| GO | negative regulation of interferon-gan  | 2 | 7  | 0.0778892 | 64127 nucleotide-binding oligomerization domain containing 2                  |
| GO | negative regulation of interferon-gan  | 2 | 7  | 0.0778892 | 7099 toll-like receptor 4                                                     |
| GO | hyperosmotic response                  | 2 | 7  | 0.0778892 | 6750 somatostatin                                                             |
| GO | hyperosmotic response                  | 2 | 7  | 0.0778892 | 7098 toll-like receptor 3                                                     |
| GO | positive regulation of chemokine bio:  | 2 | 7  | 0.0778892 | 7098 toll-like receptor 3                                                     |
| GO | positive regulation of chemokine bio:  | 2 | 7  | 0.0778892 | 7474 wingless-type MMTV integration site family, member 5A                    |
| GO | positive regulation of interferon-beta | 2 | 7  | 0.0778892 | 7098 toll-like receptor 3                                                     |
| GO | positive regulation of interferon-beta | 2 | 7  | 0.0778892 | 7099 toll-like receptor 4                                                     |
| GO | regulation of mRNA stability           | 2 | 7  | 0.0778892 | 7538 zinc finger protein 36, C3H type, homolog (mouse)                        |
| GO | regulation of mRNA stability           | 2 | 7  | 0.0778892 | 799 calcitonin receptor                                                       |
| GO | transmembrane receptor protein ser     | 2 | 7  | 0.0778892 | 91 activin A receptor, type IB                                                |
| GO | transmembrane receptor protein ser     | 2 | 7  | 0.0778892 | 94 activin A receptor type II-like 1                                          |
| GO | response to biotic stimulus            | 3 | 15 | 0.0782215 | 10410 interferon induced transmembrane protein 3 (1-8U)                       |
| GO | response to biotic stimulus            | 3 | 15 | 0.0782215 | 646658 transmembrane protein 90A                                              |
| GO | response to biotic stimulus            | 3 | 15 | 0.0782215 | 8519 interferon induced transmembrane protein 1 (9-27)                        |
| GO | water transport                        | 3 | 15 | 0.0782215 | 1080 cystic fibrosis transmembrane conductance regulator (ATP-binding cas:    |
| GO | water transport                        | 3 | 15 | 0.0782215 | 358 aquaporin 1 (Colton blood group)                                          |
| GO | water transport                        | 3 | 15 | 0.0782215 | 6563 solute carrier family 14 (urea transporter), member 1 (Kidd blood group) |
| GO | cellular response to heat              | 3 | 15 | 0.0782215 | 113278 chromosome 20 open reading frame 54                                    |
| GO | cellular response to heat              | 3 | 15 | 0.0782215 | 286133 scavenger receptor class A, member 5 (putative)                        |
| GO | cellular response to heat              | 3 | 15 | 0.0782215 | 6489 ST8 alpha-N-acetyl-neuraminide alpha-2,8-sialyltransferase 1             |
| GO | positive regulation of phagocytosis    | 3 | 15 | 0.0782215 | 2624 GATA binding protein 2                                                   |
| GO | positive regulation of phagocytosis    | 3 | 15 | 0.0782215 | 64127 nucleotide-binding oligomerization domain containing 2                  |
| GO | positive regulation of phagocytosis    | 3 | 15 | 0.0782215 | 718 complement component 3                                                    |
| GO | response to vitamin D                  | 3 | 15 | 0.0782215 | 3643 insulin receptor                                                         |
| GO | response to vitamin D                  | 3 | 15 | 0.0782215 | 6256 retinoid X receptor, alpha                                               |
| GO | response to vitamin D                  | 3 | 15 | 0.0782215 | 7706 tripartite motif-containing 25                                           |
| GO | polysome                               | 3 | 15 | 0.0782215 | 55124 piwi-like 2 (Drosophila)                                                |

|                                         |    |     |           |                                                                                |
|-----------------------------------------|----|-----|-----------|--------------------------------------------------------------------------------|
| GO polysome                             | 3  | 15  | 0.0782215 | 8531 cold shock domain protein A                                               |
| GO polysome                             | 3  | 15  | 0.0782215 | 9271 piwi-like 1 (Drosophila)                                                  |
| GO phosphatidylinositol-4,5-bisphosphat | 3  | 15  | 0.0782215 | 56288 par-3 partitioning defective 3 homolog (C. elegans)                      |
| GO phosphatidylinositol-4,5-bisphosphat | 3  | 15  | 0.0782215 | 85477 scinderin                                                                |
| GO phosphatidylinositol-4,5-bisphosphat | 3  | 15  | 0.0782215 | 91404 SEC14 and spectrin domains 1                                             |
| GO extrinsic to membrane                | 5  | 34  | 0.0792402 | 1755 deleted in malignant brain tumors 1                                       |
| GO extrinsic to membrane                | 5  | 34  | 0.0792402 | 257019 FERM domain containing 3                                                |
| GO extrinsic to membrane                | 5  | 34  | 0.0792402 | 29116 myosin regulatory light chain interacting protein                        |
| GO extrinsic to membrane                | 5  | 34  | 0.0792402 | 5774 protein tyrosine phosphatase, non-receptor type 3                         |
| GO extrinsic to membrane                | 5  | 34  | 0.0792402 | 94025 mucin 16, cell surface associated                                        |
| GO perikaryon                           | 5  | 34  | 0.0792402 | 2026 enolase 2 (gamma, neuronal)                                               |
| GO perikaryon                           | 5  | 34  | 0.0792402 | 4692 necdin homolog (mouse)                                                    |
| GO perikaryon                           | 5  | 34  | 0.0792402 | 5152 phosphodiesterase 9A                                                      |
| GO perikaryon                           | 5  | 34  | 0.0792402 | 885 cholecystokinin                                                            |
| GO perikaryon                           | 5  | 34  | 0.0792402 | 8912 calcium channel, voltage-dependent, T type, alpha 1H subunit              |
| GO lipid transport                      | 8  | 66  | 0.0798135 | 2055 ceroid-lipofuscinosis, neuronal 8 (epilepsy, progressive with mental ret  |
| GO lipid transport                      | 8  | 66  | 0.0798135 | 23780 apolipoprotein L, 2                                                      |
| GO lipid transport                      | 8  | 66  | 0.0798135 | 3949 low density lipoprotein receptor                                          |
| GO lipid transport                      | 8  | 66  | 0.0798135 | 6653 sortilin-related receptor, L(DLR class) A repeats-containing              |
| GO lipid transport                      | 8  | 66  | 0.0798135 | 80830 apolipoprotein L, 6                                                      |
| GO lipid transport                      | 8  | 66  | 0.0798135 | 80833 apolipoprotein L, 3                                                      |
| GO lipid transport                      | 8  | 66  | 0.0798135 | 8542 apolipoprotein L, 1                                                       |
| GO lipid transport                      | 8  | 66  | 0.0798135 | 9619 ATP-binding cassette, sub-family G (WHITE), member 1                      |
| GO anatomical structure morphogenesis   | 11 | 101 | 0.083773  | 10205 myelin protein zero-like 2                                               |
| GO anatomical structure morphogenesis   | 11 | 101 | 0.083773  | 1368 carboxypeptidase M                                                        |
| GO anatomical structure morphogenesis   | 11 | 101 | 0.083773  | 1948 ephrin-B2                                                                 |
| GO anatomical structure morphogenesis   | 11 | 101 | 0.083773  | 1999 E74-like factor 3 (ets domain transcription factor, epithelial-specific ) |
| GO anatomical structure morphogenesis   | 11 | 101 | 0.083773  | 2201 fibrillin 2                                                               |
| GO anatomical structure morphogenesis   | 11 | 101 | 0.083773  | 2239 glypican 4                                                                |
| GO anatomical structure morphogenesis   | 11 | 101 | 0.083773  | 3175 one cut homeobox 1                                                        |
| GO anatomical structure morphogenesis   | 11 | 101 | 0.083773  | 3491 cysteine-rich, angiogenic inducer, 61                                     |
| GO anatomical structure morphogenesis   | 11 | 101 | 0.083773  | 51085 MLX interacting protein-like                                             |
| GO anatomical structure morphogenesis   | 11 | 101 | 0.083773  | 5307 paired-like homeodomain 1                                                 |
| GO anatomical structure morphogenesis   | 11 | 101 | 0.083773  | 5460 POU class 5 homeobox 1                                                    |
| GO glucose homeostasis                  | 6  | 45  | 0.084217  | 222546 regulatory factor X, 6                                                  |
| GO glucose homeostasis                  | 6  | 45  | 0.084217  | 3169 forkhead box A1                                                           |

|    |                                      |    |     |           |                                                                                |
|----|--------------------------------------|----|-----|-----------|--------------------------------------------------------------------------------|
| GO | glucose homeostasis                  | 6  | 45  | 0.084217  | 3643 insulin receptor                                                          |
| GO | glucose homeostasis                  | 6  | 45  | 0.084217  | 51085 MLX interacting protein-like                                             |
| GO | glucose homeostasis                  | 6  | 45  | 0.084217  | 5367 pro-melanin-concentrating hormone                                         |
| GO | glucose homeostasis                  | 6  | 45  | 0.084217  | 5950 retinol binding protein 4, plasma                                         |
| GO | GTPase activity                      | 19 | 198 | 0.0845246 | 1785 dynamin 2                                                                 |
| GO | GTPase activity                      | 19 | 198 | 0.0845246 | 1915 eukaryotic translation elongation factor 1 alpha 1                        |
| GO | GTPase activity                      | 19 | 198 | 0.0845246 | 1983 eukaryotic translation initiation factor 5                                |
| GO | GTPase activity                      | 19 | 198 | 0.0845246 | 23682 RAB38, member RAS oncogene family                                        |
| GO | GTPase activity                      | 19 | 198 | 0.0845246 | 2633 guanylate binding protein 1, interferon-inducible, 67kDa                  |
| GO | GTPase activity                      | 19 | 198 | 0.0845246 | 2634 guanylate binding protein 2, interferon-inducible                         |
| GO | GTPase activity                      | 19 | 198 | 0.0845246 | 2635 guanylate binding protein 3                                               |
| GO | GTPase activity                      | 19 | 198 | 0.0845246 | 2769 guanine nucleotide binding protein (G protein), alpha 15 (Gq class)       |
| GO | GTPase activity                      | 19 | 198 | 0.0845246 | 379 ADP-ribosylation factor-like 4D                                            |
| GO | GTPase activity                      | 19 | 198 | 0.0845246 | 3845 v-Ki-ras2 Kirsten rat sarcoma viral oncogene homolog                      |
| GO | GTPase activity                      | 19 | 198 | 0.0845246 | 387496 RAS-like, family 11, member A                                           |
| GO | GTPase activity                      | 19 | 198 | 0.0845246 | 4599 myxovirus (influenza virus) resistance 1, interferon-inducible protein p1 |
| GO | GTPase activity                      | 19 | 198 | 0.0845246 | 4600 myxovirus (influenza virus) resistance 2 (mouse)                          |
| GO | GTPase activity                      | 19 | 198 | 0.0845246 | 51285 RAS-like, family 12                                                      |
| GO | GTPase activity                      | 19 | 198 | 0.0845246 | 51655 RAS, dexamethasone-induced 1                                             |
| GO | GTPase activity                      | 19 | 198 | 0.0845246 | 54769 DIRAS family, GTP-binding RAS-like 2                                     |
| GO | GTPase activity                      | 19 | 198 | 0.0845246 | 5873 RAB27A, member RAS oncogene family                                        |
| GO | GTPase activity                      | 19 | 198 | 0.0845246 | 85004 RAS-like, estrogen-regulated, growth inhibitor                           |
| GO | GTPase activity                      | 19 | 198 | 0.0845246 | 9567 GTP binding protein 1                                                     |
| GO | epidermal growth factor receptor sig | 4  | 25  | 0.0873408 | 1839 heparin-binding EGF-like growth factor                                    |
| GO | epidermal growth factor receptor sig | 4  | 25  | 0.0873408 | 819 calcium modulating ligand                                                  |
| GO | epidermal growth factor receptor sig | 4  | 25  | 0.0873408 | 8527 diacylglycerol kinase, delta 130kDa                                       |
| GO | epidermal growth factor receptor sig | 4  | 25  | 0.0873408 | 9185 RALBP1 associated Eps domain containing 2                                 |
| GO | mammary gland development            | 4  | 25  | 0.0873408 | 2066 v-erb-a erythroblastic leukemia viral oncogene homolog 4 (avian)          |
| GO | mammary gland development            | 4  | 25  | 0.0873408 | 2737 GLI family zinc finger 3                                                  |
| GO | mammary gland development            | 4  | 25  | 0.0873408 | 3479 insulin-like growth factor 1 (somatomedin C)                              |
| GO | mammary gland development            | 4  | 25  | 0.0873408 | 8660 insulin receptor substrate 2                                              |
| GO | skeletal system morphogenesis        | 4  | 25  | 0.0873408 | 29123 ankyrin repeat domain 11                                                 |
| GO | skeletal system morphogenesis        | 4  | 25  | 0.0873408 | 64651 cysteine-serine-rich nuclear protein 1                                   |
| GO | skeletal system morphogenesis        | 4  | 25  | 0.0873408 | 84159 AT rich interactive domain 5B (MRF1-like)                                |
| GO | skeletal system morphogenesis        | 4  | 25  | 0.0873408 | 9496 T-box 4                                                                   |
| GO | feeding behavior                     | 4  | 25  | 0.0873408 | 4886 neuropeptide Y receptor Y1                                                |

|                                             |   |    |           |                                                                              |
|---------------------------------------------|---|----|-----------|------------------------------------------------------------------------------|
| GO feeding behavior                         | 4 | 25 | 0.0873408 | 5367 pro-melanin-concentrating hormone                                       |
| GO feeding behavior                         | 4 | 25 | 0.0873408 | 56923 neuromedin U receptor 2                                                |
| GO feeding behavior                         | 4 | 25 | 0.0873408 | 627 brain-derived neurotrophic factor                                        |
| GO positive regulation of B cell proliferat | 4 | 25 | 0.0873408 | 604 B-cell CLL/lymphoma 6                                                    |
| GO positive regulation of B cell proliferat | 4 | 25 | 0.0873408 | 7099 toll-like receptor 4                                                    |
| GO positive regulation of B cell proliferat | 4 | 25 | 0.0873408 | 8660 insulin receptor substrate 2                                            |
| GO positive regulation of B cell proliferat | 4 | 25 | 0.0873408 | 952 CD38 molecule                                                            |
| GO positive regulation of protein amino a   | 5 | 35 | 0.0875028 | 2033 E1A binding protein p300                                                |
| GO positive regulation of protein amino a   | 5 | 35 | 0.0875028 | 3643 insulin receptor                                                        |
| GO positive regulation of protein amino a   | 5 | 35 | 0.0875028 | 55600 intelectin 1 (galactofuranose binding)                                 |
| GO positive regulation of protein amino a   | 5 | 35 | 0.0875028 | 652 bone morphogenetic protein 4                                             |
| GO positive regulation of protein amino a   | 5 | 35 | 0.0875028 | 79092 caspase recruitment domain family, member 14                           |
| GO steroid metabolic process                | 8 | 68 | 0.0914049 | 1559 cytochrome P450, family 2, subfamily C, polypeptide 9                   |
| GO steroid metabolic process                | 8 | 68 | 0.0914049 | 1571 cytochrome P450, family 2, subfamily E, polypeptide 1                   |
| GO steroid metabolic process                | 8 | 68 | 0.0914049 | 1577 cytochrome P450, family 3, subfamily A, polypeptide 5                   |
| GO steroid metabolic process                | 8 | 68 | 0.0914049 | 255738 proprotein convertase subtilisin/kexin type 9                         |
| GO steroid metabolic process                | 8 | 68 | 0.0914049 | 26119 low density lipoprotein receptor adaptor protein 1                     |
| GO steroid metabolic process                | 8 | 68 | 0.0914049 | 3949 low density lipoprotein receptor                                        |
| GO steroid metabolic process                | 8 | 68 | 0.0914049 | 6653 sortilin-related receptor, L(DLR class) A repeats-containing            |
| GO steroid metabolic process                | 8 | 68 | 0.0914049 | 8542 apolipoprotein L, 1                                                     |
| GO regulation of small GTPase mediated      | 6 | 46 | 0.0915452 | 10156 RAS p21 protein activator 4                                            |
| GO regulation of small GTPase mediated      | 6 | 46 | 0.0915452 | 23179 ral guanine nucleotide dissociation stimulator-like 1                  |
| GO regulation of small GTPase mediated      | 6 | 46 | 0.0915452 | 57139 ral guanine nucleotide dissociation stimulator-like 3                  |
| GO regulation of small GTPase mediated      | 6 | 46 | 0.0915452 | 57186 Ral GTPase activating protein, alpha subunit 2 (catalytic)             |
| GO regulation of small GTPase mediated      | 6 | 46 | 0.0915452 | 5900 ral guanine nucleotide dissociation stimulator                          |
| GO regulation of small GTPase mediated      | 6 | 46 | 0.0915452 | 6494 signal-induced proliferation-associated 1                               |
| GO carbonate dehydratase activity           | 3 | 16 | 0.0915718 | 11238 carbonic anhydrase VB, mitochondrial                                   |
| GO carbonate dehydratase activity           | 3 | 16 | 0.0915718 | 760 carbonic anhydrase II                                                    |
| GO carbonate dehydratase activity           | 3 | 16 | 0.0915718 | 771 carbonic anhydrase XII                                                   |
| GO glycosaminoglycan binding                | 3 | 16 | 0.0915718 | 1462 versican                                                                |
| GO glycosaminoglycan binding                | 3 | 16 | 0.0915718 | 50859 sparc/osteonectin, cwcv and kazal-like domains proteoglycan (testican) |
| GO glycosaminoglycan binding                | 3 | 16 | 0.0915718 | 7049 transforming growth factor, beta receptor III                           |
| GO negative regulation of blood pressure    | 3 | 16 | 0.0915718 | 1813 dopamine receptor D2                                                    |
| GO negative regulation of blood pressure    | 3 | 16 | 0.0915718 | 5367 pro-melanin-concentrating hormone                                       |
| GO negative regulation of blood pressure    | 3 | 16 | 0.0915718 | 5465 peroxisome proliferator-activated receptor alpha                        |
| GO antigen binding                          | 3 | 16 | 0.0915718 | 2033 E1A binding protein p300                                                |

|    |                                        |    |     |           |                                                                            |
|----|----------------------------------------|----|-----|-----------|----------------------------------------------------------------------------|
| GO | antigen binding                        | 3  | 16  | 0.0915718 | 3512 immunoglobulin J polypeptide, linker protein for immunoglobulin alpha |
| GO | antigen binding                        | 3  | 16  | 0.0915718 | 8631 src kinase associated phosphoprotein 1                                |
| GO | neurogenesis                           | 3  | 16  | 0.0915718 | 255738 proprotein convertase subtilisin/kexin type 9                       |
| GO | neurogenesis                           | 3  | 16  | 0.0915718 | 429 achaete-scute complex homolog 1 (Drosophila)                           |
| GO | neurogenesis                           | 3  | 16  | 0.0915718 | 5122 proprotein convertase subtilisin/kexin type 1                         |
| GO | carbohydrate binding                   | 3  | 16  | 0.0915718 | 26270 F-box protein 6                                                      |
| GO | carbohydrate binding                   | 3  | 16  | 0.0915718 | 56261 glycerophosphocholine phosphodiesterase GDE1 homolog (S. cerevisia   |
| GO | carbohydrate binding                   | 3  | 16  | 0.0915718 | 6402 selectin L                                                            |
| GO | gap junction                           | 3  | 16  | 0.0915718 | 2707 gap junction protein, beta 3, 31kDa                                   |
| GO | gap junction                           | 3  | 16  | 0.0915718 | 8531 cold shock domain protein A                                           |
| GO | gap junction                           | 3  | 16  | 0.0915718 | 9414 tight junction protein 2 (zona occludens 2)                           |
| GO | neuron fate commitment                 | 3  | 16  | 0.0915718 | 2737 GLI family zinc finger 3                                              |
| GO | neuron fate commitment                 | 3  | 16  | 0.0915718 | 4851 Notch homolog 1, translocation-associated (Drosophila)                |
| GO | neuron fate commitment                 | 3  | 16  | 0.0915718 | 652 bone morphogenetic protein 4                                           |
| GO | negative regulation of protein amino   | 3  | 16  | 0.0915718 | 3486 insulin-like growth factor binding protein 3                          |
| GO | negative regulation of protein amino   | 3  | 16  | 0.0915718 | 3643 insulin receptor                                                      |
| GO | negative regulation of protein amino   | 3  | 16  | 0.0915718 | 5071 Parkinson disease (autosomal recessive, juvenile) 2, parkin           |
| GO | negative regulation of endothelial cel | 3  | 16  | 0.0915718 | 498 ATP synthase, H+ transporting, mitochondrial F1 complex, alpha subun   |
| GO | negative regulation of endothelial cel | 3  | 16  | 0.0915718 | 7026 nuclear receptor subfamily 2, group F, member 2                       |
| GO | negative regulation of endothelial cel | 3  | 16  | 0.0915718 | 9966 tumor necrosis factor (ligand) superfamily, member 15                 |
| GO | regulation of cell growth              | 7  | 57  | 0.0923766 | 1154 cytokine inducible SH2-containing protein                             |
| GO | regulation of cell growth              | 7  | 57  | 0.0923766 | 183 angiotensinogen (serpin peptidase inhibitor, clade A, member 8)        |
| GO | regulation of cell growth              | 7  | 57  | 0.0923766 | 3486 insulin-like growth factor binding protein 3                          |
| GO | regulation of cell growth              | 7  | 57  | 0.0923766 | 3488 insulin-like growth factor binding protein 5                          |
| GO | regulation of cell growth              | 7  | 57  | 0.0923766 | 3491 cysteine-rich, angiogenic inducer, 61                                 |
| GO | regulation of cell growth              | 7  | 57  | 0.0923766 | 4856 nephroblastoma overexpressed gene                                     |
| GO | regulation of cell growth              | 7  | 57  | 0.0923766 | 8839 WNT1 inducible signaling pathway protein 2                            |
| GO | liver development                      | 7  | 57  | 0.0923766 | 2033 E1A binding protein p300                                              |
| GO | liver development                      | 7  | 57  | 0.0923766 | 255738 proprotein convertase subtilisin/kexin type 9                       |
| GO | liver development                      | 7  | 57  | 0.0923766 | 3142 H2.0-like homeobox                                                    |
| GO | liver development                      | 7  | 57  | 0.0923766 | 3175 one cut homeobox 1                                                    |
| GO | liver development                      | 7  | 57  | 0.0923766 | 4851 Notch homolog 1, translocation-associated (Drosophila)                |
| GO | liver development                      | 7  | 57  | 0.0923766 | 6256 retinoid X receptor, alpha                                            |
| GO | liver development                      | 7  | 57  | 0.0923766 | 7049 transforming growth factor, beta receptor III                         |
| GO | ion channel activity                   | 15 | 151 | 0.0927128 | 1080 cystic fibrosis transmembrane conductance regulator (ATP-binding cas  |
| GO | ion channel activity                   | 15 | 151 | 0.0927128 | 1139 cholinergic receptor, nicotinic, alpha 7                              |

|                         |    |     |           |                                                                           |
|-------------------------|----|-----|-----------|---------------------------------------------------------------------------|
| GO ion channel activity | 15 | 151 | 0.0927128 | 2564 gamma-aminobutyric acid (GABA) A receptor, epsilon                   |
| GO ion channel activity | 15 | 151 | 0.0927128 | 266675 bestrophin 4                                                       |
| GO ion channel activity | 15 | 151 | 0.0927128 | 27345 potassium large conductance calcium-activated channel, subfamily M, |
| GO ion channel activity | 15 | 151 | 0.0927128 | 343450 potassium channel, subfamily T, member 2                           |
| GO ion channel activity | 15 | 151 | 0.0927128 | 3709 inositol 1,4,5-triphosphate receptor, type 2                         |
| GO ion channel activity | 15 | 151 | 0.0927128 | 3782 potassium intermediate/small conductance calcium-activated channel,  |
| GO ion channel activity | 15 | 151 | 0.0927128 | 3783 potassium intermediate/small conductance calcium-activated channel,  |
| GO ion channel activity | 15 | 151 | 0.0927128 | 5025 purinergic receptor P2X, ligand-gated ion channel, 4                 |
| GO ion channel activity | 15 | 151 | 0.0927128 | 5349 FXFD domain containing ion transport regulator 3                     |
| GO ion channel activity | 15 | 151 | 0.0927128 | 53827 FXFD domain containing ion transport regulator 5                    |
| GO ion channel activity | 15 | 151 | 0.0927128 | 63982 anoctamin 3                                                         |
| GO ion channel activity | 15 | 151 | 0.0927128 | 7223 transient receptor potential cation channel, subfamily C, member 4   |
| GO ion channel activity | 15 | 151 | 0.0927128 | 8973 cholinergic receptor, nicotinic, alpha 6                             |
| GO calcium ion binding  | 50 | 605 | 0.0935166 | 1004 cadherin 6, type 2, K-cadherin (fetal kidney)                        |
| GO calcium ion binding  | 50 | 605 | 0.0935166 | 10085 EGF-like repeats and discoidin I-like domains 3                     |
| GO calcium ion binding  | 50 | 605 | 0.0935166 | 1009 cadherin 11, type 2, OB-cadherin (osteoblast)                        |
| GO calcium ion binding  | 50 | 605 | 0.0935166 | 1014 cadherin 16, KSP-cadherin                                            |
| GO calcium ion binding  | 50 | 605 | 0.0935166 | 1016 cadherin 18, type 2                                                  |
| GO calcium ion binding  | 50 | 605 | 0.0935166 | 10516 fibulin 5                                                           |
| GO calcium ion binding  | 50 | 605 | 0.0935166 | 11199 annexin A10                                                         |
| GO calcium ion binding  | 50 | 605 | 0.0935166 | 126638 repetin                                                            |
| GO calcium ion binding  | 50 | 605 | 0.0935166 | 1462 versican                                                             |
| GO calcium ion binding  | 50 | 605 | 0.0935166 | 1821 dystrophin related protein 2                                         |
| GO calcium ion binding  | 50 | 605 | 0.0935166 | 1953 multiple EGF-like-domains 6                                          |
| GO calcium ion binding  | 50 | 605 | 0.0935166 | 2015 egf-like module containing, mucin-like, hormone receptor-like 1      |
| GO calcium ion binding  | 50 | 605 | 0.0935166 | 2200 fibrillin 1                                                          |
| GO calcium ion binding  | 50 | 605 | 0.0935166 | 2201 fibrillin 2                                                          |
| GO calcium ion binding  | 50 | 605 | 0.0935166 | 22795 nidogen 2 (osteonidogen)                                            |
| GO calcium ion binding  | 50 | 605 | 0.0935166 | 23208 synaptotagmin XI                                                    |
| GO calcium ion binding  | 50 | 605 | 0.0935166 | 23418 crumbs homolog 1 (Drosophila)                                       |
| GO calcium ion binding  | 50 | 605 | 0.0935166 | 255743 nephronectin                                                       |
| GO calcium ion binding  | 50 | 605 | 0.0935166 | 29943 peptidyl arginine deiminase, type I                                 |
| GO calcium ion binding  | 50 | 605 | 0.0935166 | 30008 EGF-containing fibulin-like extracellular matrix protein 2          |
| GO calcium ion binding  | 50 | 605 | 0.0935166 | 311 annexin A11                                                           |
| GO calcium ion binding  | 50 | 605 | 0.0935166 | 388743 calpain 8                                                          |
| GO calcium ion binding  | 50 | 605 | 0.0935166 | 3949 low density lipoprotein receptor                                     |

|                                       |    |     |           |                                                                                  |
|---------------------------------------|----|-----|-----------|----------------------------------------------------------------------------------|
| GO calcium ion binding                | 50 | 605 | 0.0935166 | 4038 low density lipoprotein receptor-related protein 4                          |
| GO calcium ion binding                | 50 | 605 | 0.0935166 | 4121 mannosidase, alpha, class 1A, member 1                                      |
| GO calcium ion binding                | 50 | 605 | 0.0935166 | 4851 Notch homolog 1, translocation-associated (Drosophila)                      |
| GO calcium ion binding                | 50 | 605 | 0.0935166 | 4853 Notch homolog 2 (Drosophila)                                                |
| GO calcium ion binding                | 50 | 605 | 0.0935166 | 50859 sparco/osteonectin, cwcv and kazal-like domains proteoglycan (testican)    |
| GO calcium ion binding                | 50 | 605 | 0.0935166 | 5099 protocadherin 7                                                             |
| GO calcium ion binding                | 50 | 605 | 0.0935166 | 54681 prolyl 4-hydroxylase, transmembrane (endoplasmic reticulum)                |
| GO calcium ion binding                | 50 | 605 | 0.0935166 | 54947 lysophosphatidylcholine acyltransferase 2                                  |
| GO calcium ion binding                | 50 | 605 | 0.0935166 | 5648 mannan-binding lectin serine peptidase 1 (C4/C2 activating component)       |
| GO calcium ion binding                | 50 | 605 | 0.0935166 | 57134 mannosidase, alpha, class 1C, member 1                                     |
| GO calcium ion binding                | 50 | 605 | 0.0935166 | 57493 HEG homolog 1 (zebrafish)                                                  |
| GO calcium ion binding                | 50 | 605 | 0.0935166 | 57620 stromal interaction molecule 2                                             |
| GO calcium ion binding                | 50 | 605 | 0.0935166 | 64093 SPARC related modular calcium binding 1                                    |
| GO calcium ion binding                | 50 | 605 | 0.0935166 | 6622 synuclein, alpha (non A4 component of amyloid precursor)                    |
| GO calcium ion binding                | 50 | 605 | 0.0935166 | 6778 signal transducer and activator of transcription 6, interleukin-4 inducible |
| GO calcium ion binding                | 50 | 605 | 0.0935166 | 6857 synaptotagmin I                                                             |
| GO calcium ion binding                | 50 | 605 | 0.0935166 | 7092 tolloid-like 1                                                              |
| GO calcium ion binding                | 50 | 605 | 0.0935166 | 715 complement component 1, r subcomponent                                       |
| GO calcium ion binding                | 50 | 605 | 0.0935166 | 7447 visinin-like 1                                                              |
| GO calcium ion binding                | 50 | 605 | 0.0935166 | 79180 EF-hand domain family, member D2                                           |
| GO calcium ion binding                | 50 | 605 | 0.0935166 | 79987 sushi, von Willebrand factor type A, EGF and pentraxin domain containing   |
| GO calcium ion binding                | 50 | 605 | 0.0935166 | 80258 EF-hand domain (C-terminal) containing 2                                   |
| GO calcium ion binding                | 50 | 605 | 0.0935166 | 83394 PITPNM family member 3                                                     |
| GO calcium ion binding                | 50 | 605 | 0.0935166 | 83872 hemicentin 1                                                               |
| GO calcium ion binding                | 50 | 605 | 0.0935166 | 84059 G protein-coupled receptor 98                                              |
| GO calcium ion binding                | 50 | 605 | 0.0935166 | 85477 scinderin                                                                  |
| GO calcium ion binding                | 50 | 605 | 0.0935166 | 9185 RALBP1 associated Eps domain containing 2                                   |
| GO skeletal muscle tissue development | 5  | 36  | 0.0961953 | 1508 cathepsin B                                                                 |
| GO skeletal muscle tissue development | 5  | 36  | 0.0961953 | 2033 E1A binding protein p300                                                    |
| GO skeletal muscle tissue development | 5  | 36  | 0.0961953 | 3142 H2.0-like homeobox                                                          |
| GO skeletal muscle tissue development | 5  | 36  | 0.0961953 | 4223 mesenchyme homeobox 2                                                       |
| GO skeletal muscle tissue development | 5  | 36  | 0.0961953 | 7026 nuclear receptor subfamily 2, group F, member 2                             |
| GO ovarian follicle development       | 5  | 36  | 0.0961953 | 2296 forkhead box C1                                                             |
| GO ovarian follicle development       | 5  | 36  | 0.0961953 | 4254 KIT ligand                                                                  |
| GO ovarian follicle development       | 5  | 36  | 0.0961953 | 652 bone morphogenetic protein 4                                                 |
| GO ovarian follicle development       | 5  | 36  | 0.0961953 | 726 calpain 5                                                                    |

|                                            |    |     |           |                                                                               |
|--------------------------------------------|----|-----|-----------|-------------------------------------------------------------------------------|
| GO ovarian follicle development            | 5  | 36  | 0.0961953 | 79956 endoplasmic reticulum metallopeptidase 1                                |
| GO insulin receptor signaling pathway      | 5  | 36  | 0.0961953 | 2303 forkhead box C2 (MFH-1, mesenchyme forkhead 1)                           |
| GO insulin receptor signaling pathway      | 5  | 36  | 0.0961953 | 3484 insulin-like growth factor binding protein 1                             |
| GO insulin receptor signaling pathway      | 5  | 36  | 0.0961953 | 3643 insulin receptor                                                         |
| GO insulin receptor signaling pathway      | 5  | 36  | 0.0961953 | 5295 phosphoinositide-3-kinase, regulatory subunit 1 (alpha)                  |
| GO insulin receptor signaling pathway      | 5  | 36  | 0.0961953 | 8660 insulin receptor substrate 2                                             |
| GO extracellular matrix structural constit | 8  | 69  | 0.0975449 | 2200 fibrillin 1                                                              |
| GO extracellular matrix structural constit | 8  | 69  | 0.0975449 | 2201 fibrillin 2                                                              |
| GO extracellular matrix structural constit | 8  | 69  | 0.0975449 | 30008 EGF-containing fibulin-like extracellular matrix protein 2              |
| GO extracellular matrix structural constit | 8  | 69  | 0.0975449 | 4586 mucin 5AC, oligomeric mucus/gel-forming                                  |
| GO extracellular matrix structural constit | 8  | 69  | 0.0975449 | 4588 mucin 6, oligomeric mucus/gel-forming                                    |
| GO extracellular matrix structural constit | 8  | 69  | 0.0975449 | 54361 wingless-type MMTV integration site family, member 4                    |
| GO extracellular matrix structural constit | 8  | 69  | 0.0975449 | 7477 wingless-type MMTV integration site family, member 7B                    |
| GO extracellular matrix structural constit | 8  | 69  | 0.0975449 | 8076 microfibrillar associated protein 5                                      |
| GO negative regulation of apoptosis        | 14 | 140 | 0.0976595 | 2055 ceroid-lipofuscinosis, neuronal 8 (epilepsy, progressive with mental ret |
| GO negative regulation of apoptosis        | 14 | 140 | 0.0976595 | 23529 cardiotrophin-like cytokine factor 1                                    |
| GO negative regulation of apoptosis        | 14 | 140 | 0.0976595 | 3569 interleukin 6 (interferon, beta 2)                                       |
| GO negative regulation of apoptosis        | 14 | 140 | 0.0976595 | 358 aquaporin 1 (Colton blood group)                                          |
| GO negative regulation of apoptosis        | 14 | 140 | 0.0976595 | 415116 pim-3 oncogene                                                         |
| GO negative regulation of apoptosis        | 14 | 140 | 0.0976595 | 4254 KIT ligand                                                               |
| GO negative regulation of apoptosis        | 14 | 140 | 0.0976595 | 4286 microphthalmia-associated transcription factor                           |
| GO negative regulation of apoptosis        | 14 | 140 | 0.0976595 | 429 achaete-scute complex homolog 1 (Drosophila)                              |
| GO negative regulation of apoptosis        | 14 | 140 | 0.0976595 | 4851 Notch homolog 1, translocation-associated (Drosophila)                   |
| GO negative regulation of apoptosis        | 14 | 140 | 0.0976595 | 604 B-cell CLL/lymphoma 6                                                     |
| GO negative regulation of apoptosis        | 14 | 140 | 0.0976595 | 652 bone morphogenetic protein 4                                              |
| GO negative regulation of apoptosis        | 14 | 140 | 0.0976595 | 7474 wingless-type MMTV integration site family, member 5A                    |
| GO negative regulation of apoptosis        | 14 | 140 | 0.0976595 | 81788 NIAK family, SNF1-like kinase, 2                                        |
| GO negative regulation of apoptosis        | 14 | 140 | 0.0976595 | 8531 cold shock domain protein A                                              |
| GO cell differentiation                    | 40 | 474 | 0.0978325 | 10076 protein tyrosine phosphatase, receptor type, U                          |
| GO cell differentiation                    | 40 | 474 | 0.0978325 | 10507 sema domain, immunoglobulin domain (Ig), transmembrane domain (T        |
| GO cell differentiation                    | 40 | 474 | 0.0978325 | 10752 cell adhesion molecule with homology to L1CAM (close homolog of L1)     |
| GO cell differentiation                    | 40 | 474 | 0.0978325 | 10912 growth arrest and DNA-damage-inducible, gamma                           |
| GO cell differentiation                    | 40 | 474 | 0.0978325 | 10913 ectodysplasin A receptor                                                |
| GO cell differentiation                    | 40 | 474 | 0.0978325 | 130399 activin A receptor, type IC                                            |
| GO cell differentiation                    | 40 | 474 | 0.0978325 | 1435 colony stimulating factor 1 (macrophage)                                 |
| GO cell differentiation                    | 40 | 474 | 0.0978325 | 143689 piwi-like 4 (Drosophila)                                               |



|                                        |    |     |           |                                                                             |
|----------------------------------------|----|-----|-----------|-----------------------------------------------------------------------------|
| GO cell differentiation                | 40 | 474 | 0.0978325 | 1948 ephrin-B2                                                              |
| GO cell differentiation                | 40 | 474 | 0.0978325 | 2122 MDS1 and EVI1 complex locus                                            |
| GO cell differentiation                | 40 | 474 | 0.0978325 | 223117 sema domain, immunoglobulin domain (Ig), short basic domain, secret  |
| GO cell differentiation                | 40 | 474 | 0.0978325 | 255743 nephronectin                                                         |
| GO cell differentiation                | 40 | 474 | 0.0978325 | 26281 fibroblast growth factor 20                                           |
| GO cell differentiation                | 40 | 474 | 0.0978325 | 26468 LIM homeobox 6                                                        |
| GO cell differentiation                | 40 | 474 | 0.0978325 | 28959 transmembrane protein 176B                                            |
| GO cell differentiation                | 40 | 474 | 0.0978325 | 3142 H2.0-like homeobox                                                     |
| GO cell differentiation                | 40 | 474 | 0.0978325 | 342035 gliomedin                                                            |
| GO cell differentiation                | 40 | 474 | 0.0978325 | 3911 laminin, alpha 5                                                       |
| GO cell differentiation                | 40 | 474 | 0.0978325 | 3958 lectin, galactoside-binding, soluble, 3                                |
| GO cell differentiation                | 40 | 474 | 0.0978325 | 4170 myeloid cell leukemia sequence 1 (BCL2-related)                        |
| GO cell differentiation                | 40 | 474 | 0.0978325 | 4616 growth arrest and DNA-damage-inducible, beta                           |
| GO cell differentiation                | 40 | 474 | 0.0978325 | 4853 Notch homolog 2 (Drosophila)                                           |
| GO cell differentiation                | 40 | 474 | 0.0978325 | 4915 neurotrophic tyrosine kinase, receptor, type 2                         |
| GO cell differentiation                | 40 | 474 | 0.0978325 | 51314 thioredoxin domain containing 3 (spermatzoa)                          |
| GO cell differentiation                | 40 | 474 | 0.0978325 | 5367 pro-melanin-concentrating hormone                                      |
| GO cell differentiation                | 40 | 474 | 0.0978325 | 54852 progesterin and adipoQ receptor family member V                       |
| GO cell differentiation                | 40 | 474 | 0.0978325 | 54904 Wolf-Hirschhorn syndrome candidate 1-like 1                           |
| GO cell differentiation                | 40 | 474 | 0.0978325 | 55124 piwi-like 2 (Drosophila)                                              |
| GO cell differentiation                | 40 | 474 | 0.0978325 | 56913 core 1 synthase, glycoprotein-N-acetylgalactosamine 3-beta-galactosyl |
| GO cell differentiation                | 40 | 474 | 0.0978325 | 64359 nucleoredoxin                                                         |
| GO cell differentiation                | 40 | 474 | 0.0978325 | 7092 tolloid-like 1                                                         |
| GO cell differentiation                | 40 | 474 | 0.0978325 | 7546 Zic family member 2 (odd-paired homolog, Drosophila)                   |
| GO cell differentiation                | 40 | 474 | 0.0978325 | 79820 cation channel, sperm-associated, beta                                |
| GO cell differentiation                | 40 | 474 | 0.0978325 | 83890 spermatogenesis associated 9                                          |
| GO cell differentiation                | 40 | 474 | 0.0978325 | 84033 obscurin, cytoskeletal calmodulin and titin-interacting RhoGEF        |
| GO cell differentiation                | 40 | 474 | 0.0978325 | 85416 Zic family member 5 (odd-paired homolog, Drosophila)                  |
| GO cell differentiation                | 40 | 474 | 0.0978325 | 8600 tumor necrosis factor (ligand) superfamily, member 11                  |
| GO cell differentiation                | 40 | 474 | 0.0978325 | 91461 protein kinase domain containing, cytoplasmic homolog (mouse)         |
| GO cell differentiation                | 40 | 474 | 0.0978325 | 9271 piwi-like 1 (Drosophila)                                               |
| GO cell differentiation                | 40 | 474 | 0.0978325 | 9633 metallothionein-like 5, testis-specific (tesmin)                       |
| GO cellular response to hormone stimul | 4  | 26  | 0.0979082 | 1080 cystic fibrosis transmembrane conductance regulator (ATP-binding cas   |
| GO cellular response to hormone stimul | 4  | 26  | 0.0979082 | 1843 dual specificity phosphatase 1                                         |
| GO cellular response to hormone stimul | 4  | 26  | 0.0979082 | 2353 FBJ murine osteosarcoma viral oncogene homolog                         |
| GO cellular response to hormone stimul | 4  | 26  | 0.0979082 | 3726 jun B proto-oncogene                                                   |

|                                                           |   |    |           |                                                                                 |
|-----------------------------------------------------------|---|----|-----------|---------------------------------------------------------------------------------|
| GO branching involved in ureteric bud morphogenesis       | 4 | 26 | 0.0979082 | 183 angiotensinogen (serpin peptidase inhibitor, clade A, member 8)             |
| GO branching involved in ureteric bud morphogenesis       | 4 | 26 | 0.0979082 | 2737 GLI family zinc finger 3                                                   |
| GO branching involved in ureteric bud morphogenesis       | 4 | 26 | 0.0979082 | 3911 laminin, alpha 5                                                           |
| GO branching involved in ureteric bud morphogenesis       | 4 | 26 | 0.0979082 | 652 bone morphogenetic protein 4                                                |
| GO negative regulation of epithelial cell proliferation   | 4 | 26 | 0.0979082 | 4163 mutated in colorectal cancers                                              |
| GO negative regulation of epithelial cell proliferation   | 4 | 26 | 0.0979082 | 652 bone morphogenetic protein 4                                                |
| GO negative regulation of epithelial cell proliferation   | 4 | 26 | 0.0979082 | 7049 transforming growth factor, beta receptor III                              |
| GO negative regulation of epithelial cell proliferation   | 4 | 26 | 0.0979082 | 7474 wingless-type MMTV integration site family, member 5A                      |
| GO chloride channel activity                              | 7 | 58 | 0.0992041 | 1080 cystic fibrosis transmembrane conductance regulator (ATP-binding cassette) |
| GO chloride channel activity                              | 7 | 58 | 0.0992041 | 1193 chloride intracellular channel 2                                           |
| GO chloride channel activity                              | 7 | 58 | 0.0992041 | 2564 gamma-aminobutyric acid (GABA) A receptor, epsilon                         |
| GO chloride channel activity                              | 7 | 58 | 0.0992041 | 266675 bestrophin 4                                                             |
| GO chloride channel activity                              | 7 | 58 | 0.0992041 | 5349 FXFD domain containing ion transport regulator 3                           |
| GO chloride channel activity                              | 7 | 58 | 0.0992041 | 63982 anoctamin 3                                                               |
| GO chloride channel activity                              | 7 | 58 | 0.0992041 | 8542 apolipoprotein L, 1                                                        |
| GO oxidoreductase activity, acting on single substrates   | 7 | 58 | 0.0992041 | 23081 lysine (K)-specific demethylase 4C                                        |
| GO oxidoreductase activity, acting on single substrates   | 7 | 58 | 0.0992041 | 254295 phytanoyl-CoA dioxygenase domain containing 1                            |
| GO oxidoreductase activity, acting on single substrates   | 7 | 58 | 0.0992041 | 5351 procollagen-lysine 1, 2-oxoglutarate 5-dioxygenase 1                       |
| GO oxidoreductase activity, acting on single substrates   | 7 | 58 | 0.0992041 | 54681 prolyl 4-hydroxylase, transmembrane (endoplasmic reticulum)               |
| GO oxidoreductase activity, acting on single substrates   | 7 | 58 | 0.0992041 | 55693 lysine (K)-specific demethylase 4D                                        |
| GO oxidoreductase activity, acting on single substrates   | 7 | 58 | 0.0992041 | 5742 prostaglandin-endoperoxide synthase 1 (prostaglandin G/H synthase and      |
| GO oxidoreductase activity, acting on single substrates   | 7 | 58 | 0.0992041 | 7404 ubiquitously transcribed tetratricopeptide repeat gene, Y-linked           |
| GO UDP-galactose:beta-N-acetylglucosamine 4-epimerase     | 2 | 8  | 0.0992693 | 10317 UDP-Gal:betaGlcNAc beta 1,3-galactosyltransferase, polypeptide 5          |
| GO UDP-galactose:beta-N-acetylglucosamine 4-epimerase     | 2 | 8  | 0.0992693 | 8706 beta-1,3-N-acetylgalactosaminyltransferase 1 (globoside blood group)       |
| GO phosphate transport                                    | 2 | 8  | 0.0992693 | 10568 solute carrier family 34 (sodium phosphate), member 2                     |
| GO phosphate transport                                    | 2 | 8  | 0.0992693 | 56172 ankylosis, progressive homolog (mouse)                                    |
| GO regulation of calcium ion-dependent membrane transport | 2 | 8  | 0.0992693 | 143425 synaptotagmin IX                                                         |
| GO regulation of calcium ion-dependent membrane transport | 2 | 8  | 0.0992693 | 6857 synaptotagmin I                                                            |
| GO secretory granule membrane                             | 2 | 8  | 0.0992693 | 143425 synaptotagmin IX                                                         |
| GO secretory granule membrane                             | 2 | 8  | 0.0992693 | 5873 RAB27A, member RAS oncogene family                                         |
| GO embryonic viscerocranium morphogenesis                 | 2 | 8  | 0.0992693 | 157506 retinol dehydrogenase 10 (all-trans)                                     |
| GO embryonic viscerocranium morphogenesis                 | 2 | 8  | 0.0992693 | 2303 forkhead box C2 (MFH-1, mesenchyme forkhead 1)                             |
| GO behavioral response to cocaine                         | 2 | 8  | 0.0992693 | 1813 dopamine receptor D2                                                       |
| GO behavioral response to cocaine                         | 2 | 8  | 0.0992693 | 1815 dopamine receptor D4                                                       |
| GO positive regulation of neuroblast proliferation        | 2 | 8  | 0.0992693 | 1813 dopamine receptor D2                                                       |
| GO positive regulation of neuroblast proliferation        | 2 | 8  | 0.0992693 | 2290 forkhead box G1                                                            |

|    |                                                         |   |   |           |                                                                            |
|----|---------------------------------------------------------|---|---|-----------|----------------------------------------------------------------------------|
| GO | regulation of heart rate                                | 2 | 8 | 0.0992693 | 1813 dopamine receptor D2                                                  |
| GO | regulation of heart rate                                | 2 | 8 | 0.0992693 | 5367 pro-melanin-concentrating hormone                                     |
| GO | regulation of sodium ion transport                      | 2 | 8 | 0.0992693 | 1813 dopamine receptor D2                                                  |
| GO | regulation of sodium ion transport                      | 2 | 8 | 0.0992693 | 5025 purinergic receptor P2X, ligand-gated ion channel, 4                  |
| GO | phosphoinositide 3-kinase cascade                       | 2 | 8 | 0.0992693 | 1906 endothelin 1                                                          |
| GO | phosphoinositide 3-kinase cascade                       | 2 | 8 | 0.0992693 | 5295 phosphoinositide-3-kinase, regulatory subunit 1 (alpha)               |
| GO | cellular response to hydrogen peroxide                  | 2 | 8 | 0.0992693 | 2033 E1A binding protein p300                                              |
| GO | cellular response to hydrogen peroxide                  | 2 | 8 | 0.0992693 | 358 aquaporin 1 (Colton blood group)                                       |
| GO | histone acetyltransferase complex                       | 2 | 8 | 0.0992693 | 2033 E1A binding protein p300                                              |
| GO | histone acetyltransferase complex                       | 2 | 8 | 0.0992693 | 23338 PHD finger protein 15                                                |
| GO | negative regulation of programmed cell death            | 2 | 8 | 0.0992693 | 2122 MDS1 and EVI1 complex locus                                           |
| GO | negative regulation of programmed cell death            | 2 | 8 | 0.0992693 | 3815 v-kit Hardy-Zuckerman 4 feline sarcoma viral oncogene homolog         |
| GO | protein autoprocessing                                  | 2 | 8 | 0.0992693 | 255738 proprotein convertase subtilisin/kexin type 9                       |
| GO | protein autoprocessing                                  | 2 | 8 | 0.0992693 | 5122 proprotein convertase subtilisin/kexin type 1                         |
| GO | positive regulation of chondrocyte differentiation      | 2 | 8 | 0.0992693 | 2737 GLI family zinc finger 3                                              |
| GO | positive regulation of chondrocyte differentiation      | 2 | 8 | 0.0992693 | 91461 protein kinase domain containing, cytoplasmic homolog (mouse)        |
| GO | positive regulation of leukocyte chemotaxis             | 2 | 8 | 0.0992693 | 3569 interleukin 6 (interferon, beta 2)                                    |
| GO | positive regulation of leukocyte chemotaxis             | 2 | 8 | 0.0992693 | 3570 interleukin 6 receptor                                                |
| GO | regulation of embryonic development                     | 2 | 8 | 0.0992693 | 3643 insulin receptor                                                      |
| GO | regulation of embryonic development                     | 2 | 8 | 0.0992693 | 3911 laminin, alpha 5                                                      |
| GO | positive regulation of leukocyte migration              | 2 | 8 | 0.0992693 | 375056 melanoma inhibitory activity family, member 3                       |
| GO | positive regulation of leukocyte migration              | 2 | 8 | 0.0992693 | 7097 toll-like receptor 2                                                  |
| GO | mannosyl-oligosaccharide 1,2-alpha-mannosidase activity | 2 | 8 | 0.0992693 | 4121 mannosidase, alpha, class 1A, member 1                                |
| GO | mannosyl-oligosaccharide 1,2-alpha-mannosidase activity | 2 | 8 | 0.0992693 | 57134 mannosidase, alpha, class 1C, member 1                               |
| GO | glycosphingolipid biosynthetic process                  | 2 | 8 | 0.0992693 | 53947 alpha 1,4-galactosyltransferase                                      |
| GO | glycosphingolipid biosynthetic process                  | 2 | 8 | 0.0992693 | 6489 ST8 alpha-N-acetyl-neuraminidase alpha-2,8-sialyltransferase 1        |
| GO | glycerophosphodiester phosphodiesterase activity        | 2 | 8 | 0.0992693 | 56261 glycerophosphocholine phosphodiesterase GDE1 homolog (S. cerevisiae) |
| GO | glycerophosphodiester phosphodiesterase activity        | 2 | 8 | 0.0992693 | 81544 glycerophosphodiester phosphodiesterase domain containing 5          |
| GO | phosphatidylinositol-3-phosphate binding                | 2 | 8 | 0.0992693 | 56288 par-3 partitioning defective 3 homolog (C. elegans)                  |
| GO | phosphatidylinositol-3-phosphate binding                | 2 | 8 | 0.0992693 | 91404 SEC14 and spectrin domains 1                                         |
| GO | mesonephros development                                 | 2 | 8 | 0.0992693 | 5972 renin                                                                 |
| GO | mesonephros development                                 | 2 | 8 | 0.0992693 | 652 bone morphogenetic protein 4                                           |
| GO | peptidoglycan binding                                   | 2 | 8 | 0.0992693 | 64127 nucleotide-binding oligomerization domain containing 2               |
| GO | peptidoglycan binding                                   | 2 | 8 | 0.0992693 | 7097 toll-like receptor 2                                                  |
| GO | positive regulation of endocytosis                      | 2 | 8 | 0.0992693 | 6622 synuclein, alpha (non A4 component of amyloid precursor)              |
| GO | positive regulation of endocytosis                      | 2 | 8 | 0.0992693 | 79872 Cas-Br-M (murine) ecotropic retroviral transforming sequence-like 1  |

|    |                                                       |    |     |           |                                                                         |
|----|-------------------------------------------------------|----|-----|-----------|-------------------------------------------------------------------------|
| GO | regulation of dopamine secretion                      | 2  | 8   | 0.0992693 | 6622 synuclein, alpha (non A4 component of amyloid precursor)           |
| GO | regulation of dopamine secretion                      | 2  | 8   | 0.0992693 | 8973 cholinergic receptor, nicotinic, alpha 6                           |
| GO | syntaxin-1 binding                                    | 2  | 8   | 0.0992693 | 6812 syntaxin binding protein 1                                         |
| GO | syntaxin-1 binding                                    | 2  | 8   | 0.0992693 | 6857 synaptotagmin I                                                    |
| GO | cobalamin binding                                     | 2  | 8   | 0.0992693 | 6947 transcobalamin I (vitamin B12 binding protein, R binder family)    |
| GO | cobalamin binding                                     | 2  | 8   | 0.0992693 | 6948 transcobalamin II; macrocytic anemia                               |
| GO | negative regulation of endothelial cell proliferation | 2  | 8   | 0.0992693 | 7026 nuclear receptor subfamily 2, group F, member 2                    |
| GO | negative regulation of endothelial cell proliferation | 2  | 8   | 0.0992693 | 94 activin A receptor type II-like 1                                    |
| GO | calcium channel complex                               | 2  | 8   | 0.0992693 | 7223 transient receptor potential cation channel, subfamily C, member 4 |
| GO | calcium channel complex                               | 2  | 8   | 0.0992693 | 91404 SEC14 and spectrin domains 1                                      |
| GO | protein amino acid phosphorylation                    | 41 | 488 | 0.099532  | 10221 tribbles homolog 1 (Drosophila)                                   |
| GO | protein amino acid phosphorylation                    | 41 | 488 | 0.099532  | 10769 polo-like kinase 2 (Drosophila)                                   |
| GO | protein amino acid phosphorylation                    | 41 | 488 | 0.099532  | 11200 CHK2 checkpoint homolog (S. pombe)                                |
| GO | protein amino acid phosphorylation                    | 41 | 488 | 0.099532  | 11213 interleukin-1 receptor-associated kinase 3                        |
| GO | protein amino acid phosphorylation                    | 41 | 488 | 0.099532  | 130399 activin A receptor, type IC                                      |
| GO | protein amino acid phosphorylation                    | 41 | 488 | 0.099532  | 140901 serine/threonine kinase 35                                       |
| GO | protein amino acid phosphorylation                    | 41 | 488 | 0.099532  | 150094 salt-inducible kinase 1                                          |
| GO | protein amino acid phosphorylation                    | 41 | 488 | 0.099532  | 1612 death-associated protein kinase 1                                  |
| GO | protein amino acid phosphorylation                    | 41 | 488 | 0.099532  | 1969 EPH receptor A2                                                    |
| GO | protein amino acid phosphorylation                    | 41 | 488 | 0.099532  | 197259 mixed lineage kinase domain-like                                 |
| GO | protein amino acid phosphorylation                    | 41 | 488 | 0.099532  | 2044 EPH receptor A5                                                    |
| GO | protein amino acid phosphorylation                    | 41 | 488 | 0.099532  | 2263 fibroblast growth factor receptor 2                                |
| GO | protein amino acid phosphorylation                    | 41 | 488 | 0.099532  | 23043 TRAF2 and NCK interacting kinase                                  |
| GO | protein amino acid phosphorylation                    | 41 | 488 | 0.099532  | 23387 SIK family kinase 3                                               |
| GO | protein amino acid phosphorylation                    | 41 | 488 | 0.099532  | 23476 bromodomain containing 4                                          |
| GO | protein amino acid phosphorylation                    | 41 | 488 | 0.099532  | 23604 death-associated protein kinase 2                                 |
| GO | protein amino acid phosphorylation                    | 41 | 488 | 0.099532  | 28951 tribbles homolog 2 (Drosophila)                                   |
| GO | protein amino acid phosphorylation                    | 41 | 488 | 0.099532  | 28996 homeodomain interacting protein kinase 2                          |
| GO | protein amino acid phosphorylation                    | 41 | 488 | 0.099532  | 3486 insulin-like growth factor binding protein 3                       |
| GO | protein amino acid phosphorylation                    | 41 | 488 | 0.099532  | 375449 microtubule associated serine/threonine kinase family member 4   |
| GO | protein amino acid phosphorylation                    | 41 | 488 | 0.099532  | 415116 pim-3 oncogene                                                   |
| GO | protein amino acid phosphorylation                    | 41 | 488 | 0.099532  | 4293 mitogen-activated protein kinase kinase kinase 9                   |
| GO | protein amino acid phosphorylation                    | 41 | 488 | 0.099532  | 4486 macrophage stimulating 1 receptor (c-met-related tyrosine kinase)  |
| GO | protein amino acid phosphorylation                    | 41 | 488 | 0.099532  | 4638 myosin light chain kinase                                          |
| GO | protein amino acid phosphorylation                    | 41 | 488 | 0.099532  | 4915 neurotrophic tyrosine kinase, receptor, type 2                     |
| GO | protein amino acid phosphorylation                    | 41 | 488 | 0.099532  | 5063 p21 protein (Cdc42/Rac)-activated kinase 3                         |

|                                       |    |     |           |                                                                                    |
|---------------------------------------|----|-----|-----------|------------------------------------------------------------------------------------|
| GO protein amino acid phosphorylation | 41 | 488 | 0.099532  | 5129 cyclin-dependent kinase 18                                                    |
| GO protein amino acid phosphorylation | 41 | 488 | 0.099532  | 5218 cyclin-dependent kinase 14                                                    |
| GO protein amino acid phosphorylation | 41 | 488 | 0.099532  | 57118 calcium/calmodulin-dependent protein kinase ID                               |
| GO protein amino acid phosphorylation | 41 | 488 | 0.099532  | 57147 SCY1-like 3 ( <i>S. cerevisiae</i> )                                         |
| GO protein amino acid phosphorylation | 41 | 488 | 0.099532  | 5791 protein tyrosine phosphatase, receptor type, E                                |
| GO protein amino acid phosphorylation | 41 | 488 | 0.099532  | 6446 serum/glucocorticoid regulated kinase 1                                       |
| GO protein amino acid phosphorylation | 41 | 488 | 0.099532  | 6850 spleen tyrosine kinase                                                        |
| GO protein amino acid phosphorylation | 41 | 488 | 0.099532  | 7474 wingless-type MMTV integration site family, member 5A                         |
| GO protein amino acid phosphorylation | 41 | 488 | 0.099532  | 81788 NUAK family, SNF1-like kinase, 2                                             |
| GO protein amino acid phosphorylation | 41 | 488 | 0.099532  | 84033 obscurin, cytoskeletal calmodulin and titin-interacting RhoGEF               |
| GO protein amino acid phosphorylation | 41 | 488 | 0.099532  | 9064 mitogen-activated protein kinase kinase kinase 6                              |
| GO protein amino acid phosphorylation | 41 | 488 | 0.099532  | 91 activin A receptor, type IB                                                     |
| GO protein amino acid phosphorylation | 41 | 488 | 0.099532  | 91461 protein kinase domain containing, cytoplasmic homolog (mouse)                |
| GO protein amino acid phosphorylation | 41 | 488 | 0.099532  | 9263 serine/threonine kinase 17a                                                   |
| GO protein amino acid phosphorylation | 41 | 488 | 0.099532  | 94 activin A receptor type II-like 1                                               |
| GO endoplasmic reticulum              | 70 | 880 | 0.1021424 | 10162 lysophosphatidylcholine acyltransferase 3                                    |
| GO endoplasmic reticulum              | 70 | 880 | 0.1021424 | 10170 dehydrogenase/reductase (SDR family) member 9                                |
| GO endoplasmic reticulum              | 70 | 880 | 0.1021424 | 10282 blocked early in transport 1 homolog ( <i>S. cerevisiae</i> )                |
| GO endoplasmic reticulum              | 70 | 880 | 0.1021424 | 10317 UDP-Gal:betaGlcNAc beta 1,3-galactosyltransferase, polypeptide 5             |
| GO endoplasmic reticulum              | 70 | 880 | 0.1021424 | 10439 olfactomedin 1                                                               |
| GO endoplasmic reticulum              | 70 | 880 | 0.1021424 | 10826 chromosome 5 open reading frame 4                                            |
| GO endoplasmic reticulum              | 70 | 880 | 0.1021424 | 11322 transmembrane channel-like 6                                                 |
| GO endoplasmic reticulum              | 70 | 880 | 0.1021424 | 116844 leucine-rich alpha-2-glycoprotein 1                                         |
| GO endoplasmic reticulum              | 70 | 880 | 0.1021424 | 118429 anthrax toxin receptor 2                                                    |
| GO endoplasmic reticulum              | 70 | 880 | 0.1021424 | 121506 endoplasmic reticulum protein 27                                            |
| GO endoplasmic reticulum              | 70 | 880 | 0.1021424 | 123 perilipin 2                                                                    |
| GO endoplasmic reticulum              | 70 | 880 | 0.1021424 | 123099 degenerative spermatocyte homolog 2, lipid desaturase ( <i>Drosophila</i> ) |
| GO endoplasmic reticulum              | 70 | 880 | 0.1021424 | 130367 sphingosine-1-phosphate phosphatase 2                                       |
| GO endoplasmic reticulum              | 70 | 880 | 0.1021424 | 147138 transmembrane channel-like 8                                                |
| GO endoplasmic reticulum              | 70 | 880 | 0.1021424 | 1558 cytochrome P450, family 2, subfamily C, polypeptide 8                         |
| GO endoplasmic reticulum              | 70 | 880 | 0.1021424 | 1559 cytochrome P450, family 2, subfamily C, polypeptide 9                         |
| GO endoplasmic reticulum              | 70 | 880 | 0.1021424 | 1571 cytochrome P450, family 2, subfamily E, polypeptide 1                         |
| GO endoplasmic reticulum              | 70 | 880 | 0.1021424 | 157506 retinol dehydrogenase 10 (all-trans)                                        |
| GO endoplasmic reticulum              | 70 | 880 | 0.1021424 | 1577 cytochrome P450, family 3, subfamily A, polypeptide 5                         |
| GO endoplasmic reticulum              | 70 | 880 | 0.1021424 | 163590 torsin A interacting protein 2                                              |
| GO endoplasmic reticulum              | 70 | 880 | 0.1021424 | 165679 chromosome 3 open reading frame 57                                          |

|    |                       |    |     |           |                                                                               |
|----|-----------------------|----|-----|-----------|-------------------------------------------------------------------------------|
| GO | endoplasmic reticulum | 70 | 880 | 0.1021424 | 1803 dipeptidyl-peptidase 4                                                   |
| GO | endoplasmic reticulum | 70 | 880 | 0.1021424 | 195814 short chain dehydrogenase/reductase family 16C, member 5               |
| GO | endoplasmic reticulum | 70 | 880 | 0.1021424 | 2055 ceroid-lipofuscinosis, neuronal 8 (epilepsy, progressive with mental ret |
| GO | endoplasmic reticulum | 70 | 880 | 0.1021424 | 2182 acyl-CoA synthetase long-chain family member 4                           |
| GO | endoplasmic reticulum | 70 | 880 | 0.1021424 | 22901 arylsulfatase G                                                         |
| GO | endoplasmic reticulum | 70 | 880 | 0.1021424 | 256987 serine incorporator 5                                                  |
| GO | endoplasmic reticulum | 70 | 880 | 0.1021424 | 25825 beta-site APP-cleaving enzyme 2                                         |
| GO | endoplasmic reticulum | 70 | 880 | 0.1021424 | 25956 SEC31 homolog B ( <i>S. cerevisiae</i> )                                |
| GO | endoplasmic reticulum | 70 | 880 | 0.1021424 | 2861 G protein-coupled receptor 37 (endothelin receptor type B-like)          |
| GO | endoplasmic reticulum | 70 | 880 | 0.1021424 | 3601 interleukin 15 receptor, alpha                                           |
| GO | endoplasmic reticulum | 70 | 880 | 0.1021424 | 375056 melanoma inhibitory activity family, member 3                          |
| GO | endoplasmic reticulum | 70 | 880 | 0.1021424 | 387923 stress-associated endoplasmic reticulum protein family member 2        |
| GO | endoplasmic reticulum | 70 | 880 | 0.1021424 | 3913 laminin, beta 2 (laminin S)                                              |
| GO | endoplasmic reticulum | 70 | 880 | 0.1021424 | 4056 leukotriene C4 synthase                                                  |
| GO | endoplasmic reticulum | 70 | 880 | 0.1021424 | 405753 dual oxidase maturation factor 2                                       |
| GO | endoplasmic reticulum | 70 | 880 | 0.1021424 | 407738 family with sequence similarity 19 (chemokine (C-C motif)-like), membr |
| GO | endoplasmic reticulum | 70 | 880 | 0.1021424 | 412 steroid sulfatase (microsomal), isozyme S                                 |
| GO | endoplasmic reticulum | 70 | 880 | 0.1021424 | 4121 mannosidase, alpha, class 1A, member 1                                   |
| GO | endoplasmic reticulum | 70 | 880 | 0.1021424 | 4306 nuclear receptor subfamily 3, group C, member 2                          |
| GO | endoplasmic reticulum | 70 | 880 | 0.1021424 | 48 aconitase 1, soluble                                                       |
| GO | endoplasmic reticulum | 70 | 880 | 0.1021424 | 4939 2'-5'-oligoadenylate synthetase 2, 69/71kDa                              |
| GO | endoplasmic reticulum | 70 | 880 | 0.1021424 | 5046 proprotein convertase subtilisin/kexin type 6                            |
| GO | endoplasmic reticulum | 70 | 880 | 0.1021424 | 5071 Parkinson disease (autosomal recessive, juvenile) 2, parkin              |
| GO | endoplasmic reticulum | 70 | 880 | 0.1021424 | 5152 phosphodiesterase 9A                                                     |
| GO | endoplasmic reticulum | 70 | 880 | 0.1021424 | 51703 acyl-CoA synthetase long-chain family member 5                          |
| GO | endoplasmic reticulum | 70 | 880 | 0.1021424 | 51754 transmembrane protein 8B                                                |
| GO | endoplasmic reticulum | 70 | 880 | 0.1021424 | 5351 procollagen-lysine 1, 2-oxoglutarate 5-dioxygenase 1                     |
| GO | endoplasmic reticulum | 70 | 880 | 0.1021424 | 54463 family with sequence similarity 134, member B                           |
| GO | endoplasmic reticulum | 70 | 880 | 0.1021424 | 54681 prolyl 4-hydroxylase, transmembrane (endoplasmic reticulum)             |
| GO | endoplasmic reticulum | 70 | 880 | 0.1021424 | 54894 ring finger protein 43                                                  |
| GO | endoplasmic reticulum | 70 | 880 | 0.1021424 | 54947 lysophosphatidylcholine acyltransferase 2                               |
| GO | endoplasmic reticulum | 70 | 880 | 0.1021424 | 55080 TAP binding protein-like                                                |
| GO | endoplasmic reticulum | 70 | 880 | 0.1021424 | 55304 serine palmitoyltransferase, long chain base subunit 3                  |
| GO | endoplasmic reticulum | 70 | 880 | 0.1021424 | 56605 ERO1-like beta ( <i>S. cerevisiae</i> )                                 |
| GO | endoplasmic reticulum | 70 | 880 | 0.1021424 | 5742 prostaglandin-endoperoxide synthase 1 (prostaglandin G/H synthase a      |
| GO | endoplasmic reticulum | 70 | 880 | 0.1021424 | 57620 stromal interaction molecule 2                                          |

|    |                       |    |     |           |                                                                           |
|----|-----------------------|----|-----|-----------|---------------------------------------------------------------------------|
| GO | endoplasmic reticulum | 70 | 880 | 0.1021424 | 6238 ribosome binding protein 1 homolog 180kDa (dog)                      |
| GO | endoplasmic reticulum | 70 | 880 | 0.1021424 | 6446 serum/glucocorticoid regulated kinase 1                              |
| GO | endoplasmic reticulum | 70 | 880 | 0.1021424 | 64699 transmembrane protease, serine 3                                    |
| GO | endoplasmic reticulum | 70 | 880 | 0.1021424 | 7098 toll-like receptor 3                                                 |
| GO | endoplasmic reticulum | 70 | 880 | 0.1021424 | 7869 sema domain, immunoglobulin domain (Ig), short basic domain, secret  |
| GO | endoplasmic reticulum | 70 | 880 | 0.1021424 | 79152 fatty acid 2-hydroxylase                                            |
| GO | endoplasmic reticulum | 70 | 880 | 0.1021424 | 79956 endoplasmic reticulum metalloproteinase 1                           |
| GO | endoplasmic reticulum | 70 | 880 | 0.1021424 | 819 calcium modulating ligand                                             |
| GO | endoplasmic reticulum | 70 | 880 | 0.1021424 | 84879 major facilitator superfamily domain containing 2A                  |
| GO | endoplasmic reticulum | 70 | 880 | 0.1021424 | 89866 SEC16 homolog B ( <i>S. cerevisiae</i> )                            |
| GO | endoplasmic reticulum | 70 | 880 | 0.1021424 | 90993 cAMP responsive element binding protein 3-like 1                    |
| GO | endoplasmic reticulum | 70 | 880 | 0.1021424 | 9563 hexose-6-phosphate dehydrogenase (glucose 1-dehydrogenase)           |
| GO | endoplasmic reticulum | 70 | 880 | 0.1021424 | 9619 ATP-binding cassette, sub-family G (WHITE), member 1                 |
| GO | heparin binding       | 11 | 105 | 0.1032557 | 1839 heparin-binding EGF-like growth factor                               |
| GO | heparin binding       | 11 | 105 | 0.1032557 | 2263 fibroblast growth factor receptor 2                                  |
| GO | heparin binding       | 11 | 105 | 0.1032557 | 3491 cysteine-rich, angiogenic inducer, 61                                |
| GO | heparin binding       | 11 | 105 | 0.1032557 | 3827 kininogen 1                                                          |
| GO | heparin binding       | 11 | 105 | 0.1032557 | 5046 proprotein convertase subtilisin/kexin type 6                        |
| GO | heparin binding       | 11 | 105 | 0.1032557 | 6372 chemokine (C-X-C motif) ligand 6 (granulocyte chemotactic protein 2) |
| GO | heparin binding       | 11 | 105 | 0.1032557 | 6402 selectin L                                                           |
| GO | heparin binding       | 11 | 105 | 0.1032557 | 652 bone morphogenetic protein 4                                          |
| GO | heparin binding       | 11 | 105 | 0.1032557 | 7049 transforming growth factor, beta receptor III                        |
| GO | heparin binding       | 11 | 105 | 0.1032557 | 8646 chordin                                                              |
| GO | heparin binding       | 11 | 105 | 0.1032557 | 9510 ADAM metalloproteinase with thrombospondin type 1 motif, 1           |
| GO | response to ethanol   | 8  | 70  | 0.1039122 | 1508 cathepsin B                                                          |
| GO | response to ethanol   | 8  | 70  | 0.1039122 | 1571 cytochrome P450, family 2, subfamily E, polypeptide 1                |
| GO | response to ethanol   | 8  | 70  | 0.1039122 | 2033 E1A binding protein p300                                             |
| GO | response to ethanol   | 8  | 70  | 0.1039122 | 3570 interleukin 6 receptor                                               |
| GO | response to ethanol   | 8  | 70  | 0.1039122 | 3643 insulin receptor                                                     |
| GO | response to ethanol   | 8  | 70  | 0.1039122 | 4129 monoamine oxidase B                                                  |
| GO | response to ethanol   | 8  | 70  | 0.1039122 | 5950 retinol binding protein 4, plasma                                    |
| GO | response to ethanol   | 8  | 70  | 0.1039122 | 7099 toll-like receptor 4                                                 |
| GO | oxygen binding        | 5  | 37  | 0.1053072 | 1558 cytochrome P450, family 2, subfamily C, polypeptide 8                |
| GO | oxygen binding        | 5  | 37  | 0.1053072 | 1559 cytochrome P450, family 2, subfamily C, polypeptide 9                |
| GO | oxygen binding        | 5  | 37  | 0.1053072 | 1571 cytochrome P450, family 2, subfamily E, polypeptide 1                |
| GO | oxygen binding        | 5  | 37  | 0.1053072 | 1577 cytochrome P450, family 3, subfamily A, polypeptide 5                |

|                                           |    |     |           |                                                                               |
|-------------------------------------------|----|-----|-----------|-------------------------------------------------------------------------------|
| GO oxygen binding                         | 5  | 37  | 0.1053072 | 4151 myoglobin                                                                |
| GO positive regulation of pathway-restric | 3  | 17  | 0.1057881 | 11030 RNA binding protein with multiple splicing                              |
| GO positive regulation of pathway-restric | 3  | 17  | 0.1057881 | 652 bone morphogenetic protein 4                                              |
| GO positive regulation of pathway-restric | 3  | 17  | 0.1057881 | 91 activin A receptor, type IB                                                |
| GO aspartic-type endopeptidase activity   | 3  | 17  | 0.1057881 | 121665 signal peptide peptidase 3                                             |
| GO aspartic-type endopeptidase activity   | 3  | 17  | 0.1057881 | 25825 beta-site APP-cleaving enzyme 2                                         |
| GO aspartic-type endopeptidase activity   | 3  | 17  | 0.1057881 | 5972 renin                                                                    |
| GO sphingolipid metabolic process         | 3  | 17  | 0.1057881 | 166929 sphingomyelin synthase 2                                               |
| GO sphingolipid metabolic process         | 3  | 17  | 0.1057881 | 6489 ST8 alpha-N-acetyl-neuraminide alpha-2,8-sialyltransferase 1             |
| GO sphingolipid metabolic process         | 3  | 17  | 0.1057881 | 79152 fatty acid 2-hydroxylase                                                |
| GO social behavior                        | 3  | 17  | 0.1057881 | 1815 dopamine receptor D4                                                     |
| GO social behavior                        | 3  | 17  | 0.1057881 | 2055 ceroid-lipofuscinosis, neuronal 8 (epilepsy, progressive with mental ret |
| GO social behavior                        | 3  | 17  | 0.1057881 | 3845 v-Ki-ras2 Kirsten rat sarcoma viral oncogene homolog                     |
| GO actin filament capping                 | 3  | 17  | 0.1057881 | 2039 erythrocyte membrane protein band 4.9 (dematin)                          |
| GO actin filament capping                 | 3  | 17  | 0.1057881 | 6710 spectrin, beta, erythrocytic                                             |
| GO actin filament capping                 | 3  | 17  | 0.1057881 | 85477 scinderin                                                               |
| GO negative regulation of osteoblast diff | 3  | 17  | 0.1057881 | 4851 Notch homolog 1, translocation-associated (Drosophila)                   |
| GO negative regulation of osteoblast diff | 3  | 17  | 0.1057881 | 8313 axin 2                                                                   |
| GO negative regulation of osteoblast diff | 3  | 17  | 0.1057881 | 8646 chordin                                                                  |
| GO transcription corepressor activity     | 14 | 142 | 0.106427  | 10346 tripartite motif-containing 22                                          |
| GO transcription corepressor activity     | 14 | 142 | 0.106427  | 1822 atrophin 1                                                               |
| GO transcription corepressor activity     | 14 | 142 | 0.106427  | 28996 homeodomain interacting protein kinase 2                                |
| GO transcription corepressor activity     | 14 | 142 | 0.106427  | 3400 inhibitor of DNA binding 4, dominant negative helix-loop-helix protein   |
| GO transcription corepressor activity     | 14 | 142 | 0.106427  | 3726 jun B proto-oncogene                                                     |
| GO transcription corepressor activity     | 14 | 142 | 0.106427  | 4204 methyl CpG binding protein 2 (Rett syndrome)                             |
| GO transcription corepressor activity     | 14 | 142 | 0.106427  | 4212 Meis homeobox 2                                                          |
| GO transcription corepressor activity     | 14 | 142 | 0.106427  | 467 activating transcription factor 3                                         |
| GO transcription corepressor activity     | 14 | 142 | 0.106427  | 4783 nuclear factor, interleukin 3 regulated                                  |
| GO transcription corepressor activity     | 14 | 142 | 0.106427  | 7026 nuclear receptor subfamily 2, group F, member 2                          |
| GO transcription corepressor activity     | 14 | 142 | 0.106427  | 8531 cold shock domain protein A                                              |
| GO transcription corepressor activity     | 14 | 142 | 0.106427  | 9572 nuclear receptor subfamily 1, group D, member 1                          |
| GO transcription corepressor activity     | 14 | 142 | 0.106427  | 9734 histone deacetylase 9                                                    |
| GO transcription corepressor activity     | 14 | 142 | 0.106427  | 9971 nuclear receptor subfamily 1, group H, member 4                          |
| GO negative regulation of signal transduc | 6  | 48  | 0.1071947 | 115265 DNA-damage-inducible transcript 4-like                                 |
| GO negative regulation of signal transduc | 6  | 48  | 0.1071947 | 1154 cytokine inducible SH2-containing protein                                |
| GO negative regulation of signal transduc | 6  | 48  | 0.1071947 | 3486 insulin-like growth factor binding protein 3                             |



|    |                                          |    |     |           |                                                                           |
|----|------------------------------------------|----|-----|-----------|---------------------------------------------------------------------------|
| GO | negative regulation of signal transduc   | 6  | 48  | 0.1071947 | 6004 regulator of G-protein signaling 16                                  |
| GO | negative regulation of signal transduc   | 6  | 48  | 0.1071947 | 8786 regulator of G-protein signaling 11                                  |
| GO | negative regulation of signal transduc   | 6  | 48  | 0.1071947 | 9021 suppressor of cytokine signaling 3                                   |
| GO | adherens junction                        | 4  | 27  | 0.109039  | 143098 membrane protein, palmitoylated 7 (MAGUK p55 subfamily member 7)   |
| GO | adherens junction                        | 4  | 27  | 0.109039  | 5318 plakophilin 2                                                        |
| GO | adherens junction                        | 4  | 27  | 0.109039  | 57619 shroom family member 3                                              |
| GO | adherens junction                        | 4  | 27  | 0.109039  | 9414 tight junction protein 2 (zona occludens 2)                          |
| GO | endocytic vesicle                        | 4  | 27  | 0.109039  | 1803 dipeptidyl-peptidase 4                                               |
| GO | endocytic vesicle                        | 4  | 27  | 0.109039  | 1902 lysophosphatidic acid receptor 1                                     |
| GO | endocytic vesicle                        | 4  | 27  | 0.109039  | 338557 G protein-coupled receptor 120                                     |
| GO | endocytic vesicle                        | 4  | 27  | 0.109039  | 9788 metastasis suppressor 1                                              |
| GO | positive regulation of fibroblast prolif | 4  | 27  | 0.109039  | 183 angiotensinogen (serpin peptidase inhibitor, clade A, member 8)       |
| GO | positive regulation of fibroblast prolif | 4  | 27  | 0.109039  | 3479 insulin-like growth factor 1 (somatomedin C)                         |
| GO | positive regulation of fibroblast prolif | 4  | 27  | 0.109039  | 358 aquaporin 1 (Colton blood group)                                      |
| GO | positive regulation of fibroblast prolif | 4  | 27  | 0.109039  | 7474 wingless-type MMTV integration site family, member 5A                |
| GO | SH2 domain binding                       | 4  | 27  | 0.109039  | 3643 insulin receptor                                                     |
| GO | SH2 domain binding                       | 4  | 27  | 0.109039  | 55824 phosphoprotein associated with glycosphingolipid microdomains 1     |
| GO | SH2 domain binding                       | 4  | 27  | 0.109039  | 8631 src kinase associated phosphoprotein 1                               |
| GO | SH2 domain binding                       | 4  | 27  | 0.109039  | 9143 synaptogyrin 3                                                       |
| GO | transmembrane receptor protein tyrosi    | 8  | 71  | 0.1105047 | 2044 EPH receptor A5                                                      |
| GO | transmembrane receptor protein tyrosi    | 8  | 71  | 0.1105047 | 2066 v-erb-a erythroblastic leukemia viral oncogene homolog 4 (avian)     |
| GO | transmembrane receptor protein tyrosi    | 8  | 71  | 0.1105047 | 3815 v-kit Hardy-Zuckerman 4 feline sarcoma viral oncogene homolog        |
| GO | transmembrane receptor protein tyrosi    | 8  | 71  | 0.1105047 | 4486 macrophage stimulating 1 receptor (c-met-related tyrosine kinase)    |
| GO | transmembrane receptor protein tyrosi    | 8  | 71  | 0.1105047 | 4915 neurotrophic tyrosine kinase, receptor, type 2                       |
| GO | transmembrane receptor protein tyrosi    | 8  | 71  | 0.1105047 | 55816 docking protein 5                                                   |
| GO | transmembrane receptor protein tyrosi    | 8  | 71  | 0.1105047 | 9019 myelin protein zero-like 1                                           |
| GO | transmembrane receptor protein tyrosi    | 8  | 71  | 0.1105047 | 9788 metastasis suppressor 1                                              |
| GO | GTPase activator activity                | 15 | 156 | 0.1137977 | 10156 RAS p21 protein activator 4                                         |
| GO | GTPase activator activity                | 15 | 156 | 0.1137977 | 1124 chimerin (chimaerin) 2                                               |
| GO | GTPase activator activity                | 15 | 156 | 0.1137977 | 126432 Ras and Rab interactor-like                                        |
| GO | GTPase activator activity                | 15 | 156 | 0.1137977 | 23092 Rho GTPase activating protein 26                                    |
| GO | GTPase activator activity                | 15 | 156 | 0.1137977 | 23365 Rho guanine nucleotide exchange factor (GEF) 12                     |
| GO | GTPase activator activity                | 15 | 156 | 0.1137977 | 259173 ALS2 C-terminal like                                               |
| GO | GTPase activator activity                | 15 | 156 | 0.1137977 | 395 Rho GTPase activating protein 6                                       |
| GO | GTPase activator activity                | 15 | 156 | 0.1137977 | 55200 pleckstrin homology domain containing, family G (with RhoGef domain |
| GO | GTPase activator activity                | 15 | 156 | 0.1137977 | 55357 TBC1 domain family, member 2                                        |

|    |                                     |    |     |           |                                                                               |
|----|-------------------------------------|----|-----|-----------|-------------------------------------------------------------------------------|
| GO | GTPase activator activity           | 15 | 156 | 0.1137977 | 57186 Ral GTPase activating protein, alpha subunit 2 (catalytic)              |
| GO | GTPase activator activity           | 15 | 156 | 0.1137977 | 57636 Rho GTPase activating protein 23                                        |
| GO | GTPase activator activity           | 15 | 156 | 0.1137977 | 6004 regulator of G-protein signaling 16                                      |
| GO | GTPase activator activity           | 15 | 156 | 0.1137977 | 6494 signal-induced proliferation-associated 1                                |
| GO | GTPase activator activity           | 15 | 156 | 0.1137977 | 8786 regulator of G-protein signaling 11                                      |
| GO | GTPase activator activity           | 15 | 156 | 0.1137977 | 9459 Rac/Cdc42 guanine nucleotide exchange factor (GEF) 6                     |
| GO | positive regulation of angiogenesis | 5  | 38  | 0.1148267 | 1139 cholinergic receptor, nicotinic, alpha 7                                 |
| GO | positive regulation of angiogenesis | 5  | 38  | 0.1148267 | 2624 GATA binding protein 2                                                   |
| GO | positive regulation of angiogenesis | 5  | 38  | 0.1148267 | 358 aquaporin 1 (Colton blood group)                                          |
| GO | positive regulation of angiogenesis | 5  | 38  | 0.1148267 | 718 complement component 3                                                    |
| GO | positive regulation of angiogenesis | 5  | 38  | 0.1148267 | 7474 wingless-type MMTV integration site family, member 5A                    |
| GO | digestion                           | 6  | 49  | 0.1155039 | 10891 peroxisome proliferator-activated receptor gamma, coactivator 1 alpha   |
| GO | digestion                           | 6  | 49  | 0.1155039 | 4586 mucin 5AC, oligomeric mucus/gel-forming                                  |
| GO | digestion                           | 6  | 49  | 0.1155039 | 6564 solute carrier family 15 (oligopeptide transporter), member 1            |
| GO | digestion                           | 6  | 49  | 0.1155039 | 6750 somatostatin                                                             |
| GO | digestion                           | 6  | 49  | 0.1155039 | 6751 somatostatin receptor 1                                                  |
| GO | digestion                           | 6  | 49  | 0.1155039 | 7032 trefoil factor 2                                                         |
| GO | phospholipid binding                | 6  | 49  | 0.1155039 | 1373 carbamoyl-phosphate synthetase 1, mitochondrial                          |
| GO | phospholipid binding                | 6  | 49  | 0.1155039 | 5724 platelet-activating factor receptor                                      |
| GO | phospholipid binding                | 6  | 49  | 0.1155039 | 6857 synaptotagmin I                                                          |
| GO | phospholipid binding                | 6  | 49  | 0.1155039 | 7941 phospholipase A2, group VII (platelet-activating factor acetylhydrolase, |
| GO | phospholipid binding                | 6  | 49  | 0.1155039 | 9619 ATP-binding cassette, sub-family G (WHITE), member 1                     |
| GO | phospholipid binding                | 6  | 49  | 0.1155039 | 9892 synaptosomal-associated protein, 91kDa homolog (mouse)                   |
| GO | tight junction                      | 8  | 72  | 0.1173196 | 1364 claudin 4                                                                |
| GO | tight junction                      | 8  | 72  | 0.1173196 | 143098 membrane protein, palmitoylated 7 (MAGUK p55 subfamily member 7)       |
| GO | tight junction                      | 8  | 72  | 0.1173196 | 154810 angiomin like 1                                                        |
| GO | tight junction                      | 8  | 72  | 0.1173196 | 27134 tight junction protein 3 (zona occludens 3)                             |
| GO | tight junction                      | 8  | 72  | 0.1173196 | 55870 ash1 (absent, small, or homeotic)-like (Drosophila)                     |
| GO | tight junction                      | 8  | 72  | 0.1173196 | 56288 par-3 partitioning defective 3 homolog (C. elegans)                     |
| GO | tight junction                      | 8  | 72  | 0.1173196 | 9071 claudin 10                                                               |
| GO | tight junction                      | 8  | 72  | 0.1173196 | 9414 tight junction protein 2 (zona occludens 2)                              |
| GO | actin filament organization         | 4  | 28  | 0.1207066 | 10435 CDC42 effector protein (Rho GTPase binding) 2                           |
| GO | actin filament organization         | 4  | 28  | 0.1207066 | 27295 PDZ and LIM domain 3                                                    |
| GO | actin filament organization         | 4  | 28  | 0.1207066 | 395 Rho GTPase activating protein 6                                           |
| GO | actin filament organization         | 4  | 28  | 0.1207066 | 55909 bridging integrator 3                                                   |
| GO | memory                              | 4  | 28  | 0.1207066 | 11202 kallikrein-related peptidase 8                                          |

|                                          |   |    |           |                                                                              |
|------------------------------------------|---|----|-----------|------------------------------------------------------------------------------|
| GO memory                                | 4 | 28 | 0.1207066 | 1139 cholinergic receptor, nicotinic, alpha 7                                |
| GO memory                                | 4 | 28 | 0.1207066 | 3678 integrin, alpha 5 (fibronectin receptor, alpha polypeptide)             |
| GO memory                                | 4 | 28 | 0.1207066 | 834 caspase 1, apoptosis-related cysteine peptidase (interleukin 1, beta, co |
| GO positive regulation of DNA replicati  | 4 | 28 | 0.1207066 | 3479 insulin-like growth factor 1 (somatomedin C)                            |
| GO positive regulation of DNA replicati  | 4 | 28 | 0.1207066 | 3643 insulin receptor                                                        |
| GO positive regulation of DNA replicati  | 4 | 28 | 0.1207066 | 3725 jun oncogene                                                            |
| GO positive regulation of DNA replicati  | 4 | 28 | 0.1207066 | 4254 KIT ligand                                                              |
| GO sensory perception of pain            | 4 | 28 | 0.1207066 | 4692 necdin homolog (mouse)                                                  |
| GO sensory perception of pain            | 4 | 28 | 0.1207066 | 4886 neuropeptide Y receptor Y1                                              |
| GO sensory perception of pain            | 4 | 28 | 0.1207066 | 5025 purinergic receptor P2X, ligand-gated ion channel, 4                    |
| GO sensory perception of pain            | 4 | 28 | 0.1207066 | 54463 family with sequence similarity 134, member B                          |
| GO beta-amyloid binding                  | 3 | 18 | 0.1208002 | 1139 cholinergic receptor, nicotinic, alpha 7                                |
| GO beta-amyloid binding                  | 3 | 18 | 0.1208002 | 1471 cystatin C                                                              |
| GO beta-amyloid binding                  | 3 | 18 | 0.1208002 | 9445 integral membrane protein 2B                                            |
| GO cornified envelope                    | 3 | 18 | 0.1208002 | 126638 repetin                                                               |
| GO cornified envelope                    | 3 | 18 | 0.1208002 | 6706 small proline-rich protein 2G                                           |
| GO cornified envelope                    | 3 | 18 | 0.1208002 | 8796 sciellin                                                                |
| GO integral to membrane of membrane t    | 3 | 18 | 0.1208002 | 148229 ATPase, class I, type 8B, member 3                                    |
| GO integral to membrane of membrane t    | 3 | 18 | 0.1208002 | 195814 short chain dehydrogenase/reductase family 16C, member 5              |
| GO integral to membrane of membrane t    | 3 | 18 | 0.1208002 | 412 steroid sulfatase (microsomal), isozyme S                                |
| GO establishment or maintenance of cell  | 3 | 18 | 0.1208002 | 23418 crumbs homolog 1 (Drosophila)                                          |
| GO establishment or maintenance of cell  | 3 | 18 | 0.1208002 | 56288 par-3 partitioning defective 3 homolog (C. elegans)                    |
| GO establishment or maintenance of cell  | 3 | 18 | 0.1208002 | 9892 synaptosomal-associated protein, 91kDa homolog (mouse)                  |
| GO polypeptide N-acetylgalactosaminylt   | 3 | 18 | 0.1208002 | 2589 UDP-N-acetyl-alpha-D-galactosamine:polypeptide N-acetylgalactosami      |
| GO polypeptide N-acetylgalactosaminylt   | 3 | 18 | 0.1208002 | 374378 UDP-N-acetyl-alpha-D-galactosamine:polypeptide N-acetylgalactosami    |
| GO polypeptide N-acetylgalactosaminylt   | 3 | 18 | 0.1208002 | 79695 UDP-N-acetyl-alpha-D-galactosamine:polypeptide N-acetylgalactosami     |
| GO inner ear development                 | 3 | 18 | 0.1208002 | 2737 GLI family zinc finger 3                                                |
| GO inner ear development                 | 3 | 18 | 0.1208002 | 627 brain-derived neurotrophic factor                                        |
| GO inner ear development                 | 3 | 18 | 0.1208002 | 84059 G protein-coupled receptor 98                                          |
| GO inward rectifier potassium channel ac | 3 | 18 | 0.1208002 | 3759 potassium inwardly-rectifying channel, subfamily J, member 2            |
| GO inward rectifier potassium channel ac | 3 | 18 | 0.1208002 | 3773 potassium inwardly-rectifying channel, subfamily J, member 16           |
| GO inward rectifier potassium channel ac | 3 | 18 | 0.1208002 | 3775 potassium channel, subfamily K, member 1                                |
| GO cytoskeleton organization             | 7 | 61 | 0.1212818 | 152273 FYVE, RhoGEF and PH domain containing 5                               |
| GO cytoskeleton organization             | 7 | 61 | 0.1212818 | 2039 erythrocyte membrane protein band 4.9 (dematin)                         |
| GO cytoskeleton organization             | 7 | 61 | 0.1212818 | 23043 TRAF2 and NCK interacting kinase                                       |
| GO cytoskeleton organization             | 7 | 61 | 0.1212818 | 3814 KiSS-1 metastasis-suppressor                                            |

|                                                |   |    |           |                                                                                                       |
|------------------------------------------------|---|----|-----------|-------------------------------------------------------------------------------------------------------|
| GO cytoskeleton organization                   | 7 | 61 | 0.1212818 | 3911 laminin, alpha 5                                                                                 |
| GO cytoskeleton organization                   | 7 | 61 | 0.1212818 | 3983 actin binding LIM protein 1                                                                      |
| GO cytoskeleton organization                   | 7 | 61 | 0.1212818 | 6494 signal-induced proliferation-associated 1                                                        |
| GO axonogenesis                                | 7 | 61 | 0.1212818 | 1813 dopamine receptor D2                                                                             |
| GO axonogenesis                                | 7 | 61 | 0.1212818 | 26050 SLIT and NTRK-like family, member 5                                                             |
| GO axonogenesis                                | 7 | 61 | 0.1212818 | 4851 Notch homolog 1, translocation-associated (Drosophila)                                           |
| GO axonogenesis                                | 7 | 61 | 0.1212818 | 56288 par-3 partitioning defective 3 homolog (C. elegans)                                             |
| GO axonogenesis                                | 7 | 61 | 0.1212818 | 57453 Down syndrome cell adhesion molecule like 1                                                     |
| GO axonogenesis                                | 7 | 61 | 0.1212818 | 885 cholecystokinin                                                                                   |
| GO axonogenesis                                | 7 | 61 | 0.1212818 | 9892 synaptosomal-associated protein, 91kDa homolog (mouse)                                           |
| GO NADPH oxidase complex                       | 2 | 9  | 0.1220356 | 10811 NADPH oxidase activator 1                                                                       |
| GO NADPH oxidase complex                       | 2 | 9  | 0.1220356 | 27035 NADPH oxidase 1                                                                                 |
| GO intracellular part                          | 2 | 9  | 0.1220356 | 112 adenylate cyclase 6                                                                               |
| GO intracellular part                          | 2 | 9  | 0.1220356 | 154 adrenergic, beta-2-, receptor, surface                                                            |
| GO negative regulation of interleukin-6 p      | 2 | 9  | 0.1220356 | 11213 interleukin-1 receptor-associated kinase 3                                                      |
| GO negative regulation of interleukin-6 p      | 2 | 9  | 0.1220356 | 7099 toll-like receptor 4                                                                             |
| GO negative regulation of protein catabolism   | 2 | 9  | 0.1220356 | 11213 interleukin-1 receptor-associated kinase 3                                                      |
| GO negative regulation of protein catabolism   | 2 | 9  | 0.1220356 | 4194 Mdm4 p53 binding protein homolog (mouse)                                                         |
| GO embryonic foregut morphogenesis             | 2 | 9  | 0.1220356 | 116113 forkhead box P4                                                                                |
| GO embryonic foregut morphogenesis             | 2 | 9  | 0.1220356 | 4087 SMAD family member 2                                                                             |
| GO retinal binding                             | 2 | 9  | 0.1220356 | 1382 cellular retinoic acid binding protein 2                                                         |
| GO retinal binding                             | 2 | 9  | 0.1220356 | 5950 retinol binding protein 4, plasma                                                                |
| GO respiratory burst                           | 2 | 9  | 0.1220356 | 1604 CD55 molecule, decay accelerating factor for complement (Cromer blood group)                     |
| GO respiratory burst                           | 2 | 9  | 0.1220356 | 27035 NADPH oxidase 1                                                                                 |
| GO associative learning                        | 2 | 9  | 0.1220356 | 1813 dopamine receptor D2                                                                             |
| GO associative learning                        | 2 | 9  | 0.1220356 | 2055 ceroid-lipofuscinosis, neuronal 8 (epilepsy, progressive with mental retardation)                |
| GO phosphoinositide metabolic process          | 2 | 9  | 0.1220356 | 1813 dopamine receptor D2                                                                             |
| GO phosphoinositide metabolic process          | 2 | 9  | 0.1220356 | 83394 PITPNM family member 3                                                                          |
| GO low-density lipoprotein particle remodeling | 2 | 9  | 0.1220356 | 183 angiotensinogen (serpin peptidase inhibitor, clade A, member 8)                                   |
| GO low-density lipoprotein particle remodeling | 2 | 9  | 0.1220356 | 9619 ATP-binding cassette, sub-family G (WHITE), member 1                                             |
| GO telencephalon development                   | 2 | 9  | 0.1220356 | 2066 v-erb-a erythroblastic leukemia viral oncogene homolog 4 (avian)                                 |
| GO telencephalon development                   | 2 | 9  | 0.1220356 | 652 bone morphogenetic protein 4                                                                      |
| GO fucosyltransferase activity                 | 2 | 9  | 0.1220356 | 2525 fucosyltransferase 3 (galactoside 3(4)-L-fucosyltransferase, Lewis blood group antigen synthase) |
| GO fucosyltransferase activity                 | 2 | 9  | 0.1220356 | 2526 fucosyltransferase 4 (alpha (1,3) fucosyltransferase, myeloid-specific)                          |
| GO detection of calcium ion                    | 2 | 9  | 0.1220356 | 27345 potassium large conductance calcium-activated channel, subfamily M, member 1                    |
| GO detection of calcium ion                    | 2 | 9  | 0.1220356 | 6857 synaptotagmin I                                                                                  |

|    |                                       |   |    |           |                                                                             |
|----|---------------------------------------|---|----|-----------|-----------------------------------------------------------------------------|
| GO | regulation of MAPKKK cascade          | 2 | 9  | 0.1220356 | 2911 glutamate receptor, metabotropic 1                                     |
| GO | regulation of MAPKKK cascade          | 2 | 9  | 0.1220356 | 5972 renin                                                                  |
| GO | phospholipase binding                 | 2 | 9  | 0.1220356 | 395 Rho GTPase activating protein 6                                         |
| GO | phospholipase binding                 | 2 | 9  | 0.1220356 | 6622 synuclein, alpha (non A4 component of amyloid precursor)               |
| GO | neuropeptide Y receptor activity      | 2 | 9  | 0.1220356 | 4886 neuropeptide Y receptor Y1                                             |
| GO | neuropeptide Y receptor activity      | 2 | 9  | 0.1220356 | 4889 neuropeptide Y receptor Y5                                             |
| GO | calcium-transporting ATPase activity  | 2 | 9  | 0.1220356 | 493 ATPase, Ca <sup>++</sup> transporting, plasma membrane 4                |
| GO | calcium-transporting ATPase activity  | 2 | 9  | 0.1220356 | 9914 ATPase, Ca <sup>++</sup> transporting, type 2C, member 2               |
| GO | ATP hydrolysis coupled proton transp  | 2 | 9  | 0.1220356 | 50617 ATPase, H <sup>+</sup> transporting, lysosomal V0 subunit a4          |
| GO | ATP hydrolysis coupled proton transp  | 2 | 9  | 0.1220356 | 8992 ATPase, H <sup>+</sup> transporting, lysosomal 9kDa, V0 subunit e1     |
| GO | GTP biosynthetic process              | 2 | 9  | 0.1220356 | 51314 thioredoxin domain containing 3 (spermatzoa)                          |
| GO | GTP biosynthetic process              | 2 | 9  | 0.1220356 | 8382 non-metastatic cells 5, protein expressed in (nucleoside-diphosphate k |
| GO | nucleoside diphosphate kinase activit | 2 | 9  | 0.1220356 | 51314 thioredoxin domain containing 3 (spermatzoa)                          |
| GO | nucleoside diphosphate kinase activit | 2 | 9  | 0.1220356 | 8382 non-metastatic cells 5, protein expressed in (nucleoside-diphosphate k |
| GO | UTP biosynthetic process              | 2 | 9  | 0.1220356 | 51314 thioredoxin domain containing 3 (spermatzoa)                          |
| GO | UTP biosynthetic process              | 2 | 9  | 0.1220356 | 8382 non-metastatic cells 5, protein expressed in (nucleoside-diphosphate k |
| GO | lipopolysaccharide binding            | 2 | 9  | 0.1220356 | 7099 toll-like receptor 4                                                   |
| GO | lipopolysaccharide binding            | 2 | 9  | 0.1220356 | 929 CD14 molecule                                                           |
| GO | M band                                | 2 | 9  | 0.1220356 | 84033 obscurin, cytoskeletal calmodulin and titin-interacting RhoGEF        |
| GO | M band                                | 2 | 9  | 0.1220356 | 8736 myomesin 1, 185kDa                                                     |
| GO | male meiosis I                        | 2 | 9  | 0.1220356 | 8900 cyclin A1                                                              |
| GO | male meiosis I                        | 2 | 9  | 0.1220356 | 9985 REC8 homolog (yeast)                                                   |
| GO | RNA polymerase II transcription factc | 5 | 39 | 0.1247403 | 2296 forkhead box C1                                                        |
| GO | RNA polymerase II transcription factc | 5 | 39 | 0.1247403 | 2303 forkhead box C2 (MFH-1, mesenchyme forkhead 1)                         |
| GO | RNA polymerase II transcription factc | 5 | 39 | 0.1247403 | 3725 jun oncogene                                                           |
| GO | RNA polymerase II transcription factc | 5 | 39 | 0.1247403 | 4286 microphthalmia-associated transcription factor                         |
| GO | RNA polymerase II transcription factc | 5 | 39 | 0.1247403 | 4784 nuclear factor I/X (CCAAT-binding transcription factor)                |
| GO | peptidase inhibitor activity          | 9 | 85 | 0.1256783 | 1469 cystatin SN                                                            |
| GO | peptidase inhibitor activity          | 9 | 85 | 0.1256783 | 1471 cystatin C                                                             |
| GO | peptidase inhibitor activity          | 9 | 85 | 0.1256783 | 153218 serine peptidase inhibitor, Kazal type 13 (putative)                 |
| GO | peptidase inhibitor activity          | 9 | 85 | 0.1256783 | 23145 SCO-spondin homolog (Bos taurus)                                      |
| GO | peptidase inhibitor activity          | 9 | 85 | 0.1256783 | 3827 kininogen 1                                                            |
| GO | peptidase inhibitor activity          | 9 | 85 | 0.1256783 | 404203 serine peptidase inhibitor, Kazal type 6                             |
| GO | peptidase inhibitor activity          | 9 | 85 | 0.1256783 | 6692 serine peptidase inhibitor, Kunitz type 1                              |
| GO | peptidase inhibitor activity          | 9 | 85 | 0.1256783 | 80760 inter-alpha (globulin) inhibitor H5                                   |
| GO | peptidase inhibitor activity          | 9 | 85 | 0.1256783 | 89778 serpin peptidase inhibitor, clade B (ovalbumin), member 11 (gene/pse) |

|    |                 |    |     |           |                                                                               |
|----|-----------------|----|-----|-----------|-------------------------------------------------------------------------------|
| GO | Golgi apparatus | 62 | 784 | 0.1273212 | 10090 uronyl-2-sulfotransferase                                               |
| GO | Golgi apparatus | 62 | 784 | 0.1273212 | 10282 blocked early in transport 1 homolog ( <i>S. cerevisiae</i> )           |
| GO | Golgi apparatus | 62 | 784 | 0.1273212 | 10317 UDP-Gal:betaGlcNAc beta 1,3-galactosyltransferase, polypeptide 5        |
| GO | Golgi apparatus | 62 | 784 | 0.1273212 | 127845 golgi transport 1 homolog A ( <i>S. cerevisiae</i> )                   |
| GO | Golgi apparatus | 62 | 784 | 0.1273212 | 129049 small G protein signaling modulator 1                                  |
| GO | Golgi apparatus | 62 | 784 | 0.1273212 | 152273 FYVE, RhoGEF and PH domain containing 5                                |
| GO | Golgi apparatus | 62 | 784 | 0.1273212 | 166929 sphingomyelin synthase 2                                               |
| GO | Golgi apparatus | 62 | 784 | 0.1273212 | 1803 dipeptidyl-peptidase 4                                                   |
| GO | Golgi apparatus | 62 | 784 | 0.1273212 | 192134 UDP-GlcNAc:betaGal beta-1,3-N-acetylglucosaminyltransferase 6 (core    |
| GO | Golgi apparatus | 62 | 784 | 0.1273212 | 2525 fucosyltransferase 3 (galactoside 3(4)-L-fucosyltransferase, Lewis blood |
| GO | Golgi apparatus | 62 | 784 | 0.1273212 | 2526 fucosyltransferase 4 (alpha (1,3) fucosyltransferase, myeloid-specific)  |
| GO | Golgi apparatus | 62 | 784 | 0.1273212 | 25825 beta-site APP-cleaving enzyme 2                                         |
| GO | Golgi apparatus | 62 | 784 | 0.1273212 | 2589 UDP-N-acetyl-alpha-D-galactosamine:polypeptide N-acetylgalactosami       |
| GO | Golgi apparatus | 62 | 784 | 0.1273212 | 26035 glucuronic acid epimerase                                               |
| GO | Golgi apparatus | 62 | 784 | 0.1273212 | 27090 ST6 (alpha-N-acetyl-neuraminyl-2,3-beta-galactosyl-1,3)-N-acetylgalact  |
| GO | Golgi apparatus | 62 | 784 | 0.1273212 | 2752 glutamate-ammonia ligase (glutamine synthetase)                          |
| GO | Golgi apparatus | 62 | 784 | 0.1273212 | 2801 golgin A2                                                                |
| GO | Golgi apparatus | 62 | 784 | 0.1273212 | 3601 interleukin 15 receptor, alpha                                           |
| GO | Golgi apparatus | 62 | 784 | 0.1273212 | 374378 UDP-N-acetyl-alpha-D-galactosamine:polypeptide N-acetylgalactosami     |
| GO | Golgi apparatus | 62 | 784 | 0.1273212 | 3790 potassium voltage-gated channel, delayed-rectifier, subfamily S, memb    |
| GO | Golgi apparatus | 62 | 784 | 0.1273212 | 388743 calpain 8                                                              |
| GO | Golgi apparatus | 62 | 784 | 0.1273212 | 412 steroid sulfatase (microsomal), isozyme S                                 |
| GO | Golgi apparatus | 62 | 784 | 0.1273212 | 4121 mannosidase, alpha, class 1A, member 1                                   |
| GO | Golgi apparatus | 62 | 784 | 0.1273212 | 4794 nuclear factor of kappa light polypeptide gene enhancer in B-cells inhib |
| GO | Golgi apparatus | 62 | 784 | 0.1273212 | 48 aconitase 1, soluble                                                       |
| GO | Golgi apparatus | 62 | 784 | 0.1273212 | 4851 Notch homolog 1, translocation-associated ( <i>Drosophila</i> )          |
| GO | Golgi apparatus | 62 | 784 | 0.1273212 | 5071 Parkinson disease (autosomal recessive, juvenile) 2, parkin              |
| GO | Golgi apparatus | 62 | 784 | 0.1273212 | 51272 blocked early in transport 1 homolog ( <i>S. cerevisiae</i> )-like      |
| GO | Golgi apparatus | 62 | 784 | 0.1273212 | 51280 golgi membrane protein 1                                                |
| GO | Golgi apparatus | 62 | 784 | 0.1273212 | 51313 family with sequence similarity 198, member B                           |
| GO | Golgi apparatus | 62 | 784 | 0.1273212 | 5152 phosphodiesterase 9A                                                     |
| GO | Golgi apparatus | 62 | 784 | 0.1273212 | 53405 chloride intracellular channel 5                                        |
| GO | Golgi apparatus | 62 | 784 | 0.1273212 | 53947 alpha 1,4-galactosyltransferase                                         |
| GO | Golgi apparatus | 62 | 784 | 0.1273212 | 54361 wingless-type MMTV integration site family, member 4                    |
| GO | Golgi apparatus | 62 | 784 | 0.1273212 | 54463 family with sequence similarity 134, member B                           |
| GO | Golgi apparatus | 62 | 784 | 0.1273212 | 54947 lysophosphatidylcholine acyltransferase 2                               |

|                                                    |    |     |           |                                                                              |
|----------------------------------------------------|----|-----|-----------|------------------------------------------------------------------------------|
| GO Golgi apparatus                                 | 62 | 784 | 0.1273212 | 55275 vacuolar protein sorting 53 homolog ( <i>S. cerevisiae</i> )           |
| GO Golgi apparatus                                 | 62 | 784 | 0.1273212 | 55638 Golgi-localized protein                                                |
| GO Golgi apparatus                                 | 62 | 784 | 0.1273212 | 55808 ST6 (alpha-N-acetyl-neuraminyl-2,3-beta-galactosyl-1,3)-N-acetylgalact |
| GO Golgi apparatus                                 | 62 | 784 | 0.1273212 | 57134 mannosidase, alpha, class 1C, member 1                                 |
| GO Golgi apparatus                                 | 62 | 784 | 0.1273212 | 57147 SCY1-like 3 ( <i>S. cerevisiae</i> )                                   |
| GO Golgi apparatus                                 | 62 | 784 | 0.1273212 | 5742 prostaglandin-endoperoxide synthase 1 (prostaglandin G/H synthase and   |
| GO Golgi apparatus                                 | 62 | 784 | 0.1273212 | 5768 quiescin Q6 sulfhydryl oxidase 1                                        |
| GO Golgi apparatus                                 | 62 | 784 | 0.1273212 | 5801 protein tyrosine phosphatase, receptor type, R                          |
| GO Golgi apparatus                                 | 62 | 784 | 0.1273212 | 5873 RAB27A, member RAS oncogene family                                      |
| GO Golgi apparatus                                 | 62 | 784 | 0.1273212 | 64083 golgi phosphoprotein 3 (coat-protein)                                  |
| GO Golgi apparatus                                 | 62 | 784 | 0.1273212 | 646658 transmembrane protein 90A                                             |
| GO Golgi apparatus                                 | 62 | 784 | 0.1273212 | 6484 ST3 beta-galactoside alpha-2,3-sialyltransferase 4                      |
| GO Golgi apparatus                                 | 62 | 784 | 0.1273212 | 6489 ST8 alpha-N-acetyl-neuraminide alpha-2,8-sialyltransferase 1            |
| GO Golgi apparatus                                 | 62 | 784 | 0.1273212 | 684 bone marrow stromal cell antigen 2                                       |
| GO Golgi apparatus                                 | 62 | 784 | 0.1273212 | 79656 BEN domain containing 5                                                |
| GO Golgi apparatus                                 | 62 | 784 | 0.1273212 | 79689 STEAP family member 4                                                  |
| GO Golgi apparatus                                 | 62 | 784 | 0.1273212 | 79695 UDP-N-acetyl-alpha-D-galactosamine:polypeptide N-acetylgalactosami     |
| GO Golgi apparatus                                 | 62 | 784 | 0.1273212 | 79971 wntless homolog ( <i>Drosophila</i> )                                  |
| GO Golgi apparatus                                 | 62 | 784 | 0.1273212 | 8509 N-deacetylase/N-sulfotransferase (heparan glucosaminyl) 2               |
| GO Golgi apparatus                                 | 62 | 784 | 0.1273212 | 8706 beta-1,3-N-acetylgalactosaminyltransferase 1 (globoside blood group)    |
| GO Golgi apparatus                                 | 62 | 784 | 0.1273212 | 89866 SEC16 homolog B ( <i>S. cerevisiae</i> )                               |
| GO Golgi apparatus                                 | 62 | 784 | 0.1273212 | 91461 protein kinase domain containing, cytoplasmic homolog (mouse)          |
| GO Golgi apparatus                                 | 62 | 784 | 0.1273212 | 9435 carbohydrate (N-acetylglucosamine-6-O) sulfotransferase 2               |
| GO Golgi apparatus                                 | 62 | 784 | 0.1273212 | 9445 integral membrane protein 2B                                            |
| GO Golgi apparatus                                 | 62 | 784 | 0.1273212 | 9619 ATP-binding cassette, sub-family G (WHITE), member 1                    |
| GO Golgi apparatus                                 | 62 | 784 | 0.1273212 | 9832 janus kinase and microtubule interacting protein 2                      |
| GO embryonic axis specification                    | 1  | 2   | 0.1320282 | 10023 frequently rearranged in advanced T-cell lymphomas                     |
| GO coreceptor, soluble ligand activity             | 1  | 2   | 0.1320282 | 10268 receptor (G protein-coupled) activity modifying protein 3              |
| GO mast cell activation                            | 1  | 2   | 0.1320282 | 10397 N-myc downstream regulated 1                                           |
| GO endoplasmic reticulum Sec complex               | 1  | 2   | 0.1320282 | 1080 cystic fibrosis transmembrane conductance regulator (ATP-binding cas    |
| GO iodide transport                                | 1  | 2   | 0.1320282 | 1080 cystic fibrosis transmembrane conductance regulator (ATP-binding cas    |
| GO superoxide-generating NADPH oxidase             | 1  | 2   | 0.1320282 | 10811 NADPH oxidase activator 1                                              |
| GO positive regulation of gluconeogenesis          | 1  | 2   | 0.1320282 | 10891 peroxisome proliferator-activated receptor gamma, coactivator 1 alpha  |
| GO prenylated protein tyrosine phosphatase         | 1  | 2   | 0.1320282 | 11156 protein tyrosine phosphatase type IVA, member 3                        |
| GO negative regulation of axon regeneration        | 1  | 2   | 0.1320282 | 11202 kallikrein-related peptidase 8                                         |
| GO negative regulation of protein complex assembly | 1  | 2   | 0.1320282 | 11213 interleukin-1 receptor-associated kinase 3                             |

|                                                     |   |   |           |                                                                     |
|-----------------------------------------------------|---|---|-----------|---------------------------------------------------------------------|
| GO negative regulation of toll-like recept          | 1 | 2 | 0.1320282 | 11213 interleukin-1 receptor-associated kinase 3                    |
| GO heme transport                                   | 1 | 2 | 0.1320282 | 113235 solute carrier family 46 (folate transporter), member 1      |
| GO chloride channel regulator activity              | 1 | 2 | 0.1320282 | 1139 cholinergic receptor, nicotinic, alpha 7                       |
| GO acyl carnitine transporter activity              | 1 | 2 | 0.1320282 | 123096 solute carrier family 25, member 29                          |
| GO myosin II complex                                | 1 | 2 | 0.1320282 | 134549 shroom family member 1                                       |
| GO insulin processing                               | 1 | 2 | 0.1320282 | 1363 carboxypeptidase E                                             |
| GO anion homeostasis                                | 1 | 2 | 0.1320282 | 1373 carbamoyl-phosphate synthetase 1, mitochondrial                |
| GO response to oleic acid                           | 1 | 2 | 0.1320282 | 1373 carbamoyl-phosphate synthetase 1, mitochondrial                |
| GO complement receptor activity                     | 1 | 2 | 0.1320282 | 1380 complement component (3d/Epstein Barr virus) receptor 2        |
| GO macrophage colony stimulating facto              | 1 | 2 | 0.1320282 | 1435 colony stimulating factor 1 (macrophage)                       |
| GO positive regulation of odontogenesis             | 1 | 2 | 0.1320282 | 1435 colony stimulating factor 1 (macrophage)                       |
| GO heat generation                                  | 1 | 2 | 0.1320282 | 154 adrenergic, beta-2-, receptor, surface                          |
| GO negative regulation of smooth muscle             | 1 | 2 | 0.1320282 | 154 adrenergic, beta-2-, receptor, surface                          |
| GO positive regulation of skeletal muscle           | 1 | 2 | 0.1320282 | 154 adrenergic, beta-2-, receptor, surface                          |
| GO vasodilation by norepinephrine-epine             | 1 | 2 | 0.1320282 | 154 adrenergic, beta-2-, receptor, surface                          |
| GO (S)-limonene 6-monooxygenase activ               | 1 | 2 | 0.1320282 | 1559 cytochrome P450, family 2, subfamily C, polypeptide 9          |
| GO (S)-limonene 7-monooxygenase activ               | 1 | 2 | 0.1320282 | 1559 cytochrome P450, family 2, subfamily C, polypeptide 9          |
| GO 4-hydroxyacetophenone monooxyge                  | 1 | 2 | 0.1320282 | 1559 cytochrome P450, family 2, subfamily C, polypeptide 9          |
| GO monocarboxylic acid metabolic proce              | 1 | 2 | 0.1320282 | 1559 cytochrome P450, family 2, subfamily C, polypeptide 9          |
| GO primary lung bud formation                       | 1 | 2 | 0.1320282 | 157506 retinol dehydrogenase 10 (all-trans)                         |
| GO retinoic acid biosynthetic process               | 1 | 2 | 0.1320282 | 157506 retinol dehydrogenase 10 (all-trans)                         |
| GO alkaloid catabolic process                       | 1 | 2 | 0.1320282 | 1577 cytochrome P450, family 3, subfamily A, polypeptide 5          |
| GO ceramide cholinephosphotransferase               | 1 | 2 | 0.1320282 | 166929 sphingomyelin synthase 2                                     |
| GO sphingomyelin synthase activity                  | 1 | 2 | 0.1320282 | 166929 sphingomyelin synthase 2                                     |
| GO transferrin transport                            | 1 | 2 | 0.1320282 | 1785 dynamin 2                                                      |
| GO negative regulation of dopamine rece             | 1 | 2 | 0.1320282 | 1813 dopamine receptor D2                                           |
| GO neurological system process involved             | 1 | 2 | 0.1320282 | 1813 dopamine receptor D2                                           |
| GO positive regulation of sodium:hydrog             | 1 | 2 | 0.1320282 | 1815 dopamine receptor D4                                           |
| GO acetyltransferase activator activity             | 1 | 2 | 0.1320282 | 183 angiotensinogen (serpin peptidase inhibitor, clade A, member 8) |
| GO brain renin-angiotensin system                   | 1 | 2 | 0.1320282 | 183 angiotensinogen (serpin peptidase inhibitor, clade A, member 8) |
| GO positive regulation of NAD(P)H oxida             | 1 | 2 | 0.1320282 | 183 angiotensinogen (serpin peptidase inhibitor, clade A, member 8) |
| GO regulation of blood vessel size by ren           | 1 | 2 | 0.1320282 | 183 angiotensinogen (serpin peptidase inhibitor, clade A, member 8) |
| GO regulation of renal output by angiot             | 1 | 2 | 0.1320282 | 183 angiotensinogen (serpin peptidase inhibitor, clade A, member 8) |
| GO renin-angiotensin regulation of ald              | 1 | 2 | 0.1320282 | 183 angiotensinogen (serpin peptidase inhibitor, clade A, member 8) |
| GO smooth muscle cell proliferation                 | 1 | 2 | 0.1320282 | 183 angiotensinogen (serpin peptidase inhibitor, clade A, member 8) |
| GO positive regulation of prostaglandin- $\epsilon$ | 1 | 2 | 0.1320282 | 1906 endothelin 1                                                   |



|    |                                         |   |   |           |                                                                               |
|----|-----------------------------------------|---|---|-----------|-------------------------------------------------------------------------------|
| GO | rhythmic excitation                     | 1 | 2 | 0.1320282 | 1906 endothelin 1                                                             |
| GO | beta-1,3-galactosyl-O-glycosyl-glycop   | 1 | 2 | 0.1320282 | 192134 UDP-GlcNAc:betaGal beta-1,3-N-acetylglucosaminyltransferase 6 (core    |
| GO | cellular response to heparin            | 1 | 2 | 0.1320282 | 1958 early growth response 1                                                  |
| GO | cellular response to mycophenolic ac    | 1 | 2 | 0.1320282 | 1958 early growth response 1                                                  |
| GO | rhythmic behavior                       | 1 | 2 | 0.1320282 | 1959 early growth response 2                                                  |
| GO | notochord formation                     | 1 | 2 | 0.1320282 | 1969 EPH receptor A2                                                          |
| GO | protein-DNA complex assembly            | 1 | 2 | 0.1320282 | 2033 E1A binding protein p300                                                 |
| GO | cellular protein catabolic process      | 1 | 2 | 0.1320282 | 2055 ceroid-lipofuscinosis, neuronal 8 (epilepsy, progressive with mental ret |
| GO | glutamate uptake involved in synapti    | 1 | 2 | 0.1320282 | 2055 ceroid-lipofuscinosis, neuronal 8 (epilepsy, progressive with mental ret |
| GO | negative regulation of transferase acti | 1 | 2 | 0.1320282 | 2055 ceroid-lipofuscinosis, neuronal 8 (epilepsy, progressive with mental ret |
| GO | response to interleukin-15              | 1 | 2 | 0.1320282 | 2182 acyl-CoA synthetase long-chain family member 4                           |
| GO | IgE receptor activity                   | 1 | 2 | 0.1320282 | 2205 Fc fragment of IgE, high affinity I, receptor for; alpha polypeptide     |
| GO | pancreatic A cell differentiation       | 1 | 2 | 0.1320282 | 222546 regulatory factor X, 6                                                 |
| GO | pancreatic B cell differentiation       | 1 | 2 | 0.1320282 | 222546 regulatory factor X, 6                                                 |
| GO | dolichol kinase activity                | 1 | 2 | 0.1320282 | 22901 arylsulfatase G                                                         |
| GO | lacrimal gland development              | 1 | 2 | 0.1320282 | 2296 forkhead box C1                                                          |
| GO | paraxial mesodermal cell fate commi     | 1 | 2 | 0.1320282 | 2303 forkhead box C2 (MFH-1, mesenchyme forkhead 1)                           |
| GO | arachidonate 5-lipoxygenase activity    | 1 | 2 | 0.1320282 | 240 arachidonate 5-lipoxygenase                                               |
| GO | alpha-L-fucosidase activity             | 1 | 2 | 0.1320282 | 2517 fucosidase, alpha-L- 1, tissue                                           |
| GO | negative regulation of receptor recyc   | 1 | 2 | 0.1320282 | 255738 proprotein convertase subtilisin/kexin type 9                          |
| GO | glutamate decarboxylation to succina    | 1 | 2 | 0.1320282 | 2571 glutamate decarboxylase 1 (brain, 67kDa)                                 |
| GO | negative regulation of amyloid precu    | 1 | 2 | 0.1320282 | 25825 beta-site APP-cleaving enzyme 2                                         |
| GO | glucagon receptor activity              | 1 | 2 | 0.1320282 | 2642 glucagon receptor                                                        |
| GO | forebrain neuron fate commitment        | 1 | 2 | 0.1320282 | 26468 LIM homeobox 6                                                          |
| GO | hydrogen peroxide metabolic proces      | 1 | 2 | 0.1320282 | 27035 NADPH oxidase 1                                                         |
| GO | positive regulation of integrin biosynt | 1 | 2 | 0.1320282 | 27035 NADPH oxidase 1                                                         |
| GO | voltage-gated proton channel activity   | 1 | 2 | 0.1320282 | 27035 NADPH oxidase 1                                                         |
| GO | glycolipid metabolic process            | 1 | 2 | 0.1320282 | 27090 ST6 (alpha-N-acetyl-neuraminy-2,3-beta-galactosyl-1,3)-N-acetylgalact   |
| GO | purine nucleotide metabolic process     | 1 | 2 | 0.1320282 | 271 adenosine monophosphate deaminase 2                                       |
| GO | glutaminase activity                    | 1 | 2 | 0.1320282 | 27165 glutaminase 2 (liver, mitochondrial)                                    |
| GO | C5a anaphylatoxin receptor activity     | 1 | 2 | 0.1320282 | 27202 G protein-coupled receptor 77                                           |
| GO | artery development                      | 1 | 2 | 0.1320282 | 2737 GLI family zinc finger 3                                                 |
| GO | smoothened signaling pathway invol      | 1 | 2 | 0.1320282 | 2737 GLI family zinc finger 3                                                 |
| GO | smoothened signaling pathway invol      | 1 | 2 | 0.1320282 | 2737 GLI family zinc finger 3                                                 |
| GO | DNA nucleotidylexotransferase activi    | 1 | 2 | 0.1320282 | 27434 polymerase (DNA directed), mu                                           |
| GO | glutamate-ammonia ligase activity       | 1 | 2 | 0.1320282 | 2752 glutamate-ammonia ligase (glutamine synthetase)                          |

|    |                                         |   |   |           |        |                                                                  |
|----|-----------------------------------------|---|---|-----------|--------|------------------------------------------------------------------|
| GO | glutamine biosynthetic process          | 1 | 2 | 0.1320282 | 2752   | glutamate-ammonia ligase (glutamine synthetase)                  |
| GO | voluntary musculoskeletal movement      | 1 | 2 | 0.1320282 | 28996  | homeodomain interacting protein kinase 2                         |
| GO | Pyrin domain binding                    | 1 | 2 | 0.1320282 | 29108  | PYD and CARD domain containing                                   |
| GO | cytokinesis, completion of separation   | 1 | 2 | 0.1320282 | 311    | annexin A11                                                      |
| GO | aldehyde oxidase activity               | 1 | 2 | 0.1320282 | 316    | aldehyde oxidase 1                                               |
| GO | xanthine dehydrogenase activity         | 1 | 2 | 0.1320282 | 316    | aldehyde oxidase 1                                               |
| GO | epithelial-mesenchymal signaling inv    | 1 | 2 | 0.1320282 | 3169   | forkhead box A1                                                  |
| GO | 20-alpha-hydroxysteroid dehydrogen      | 1 | 2 | 0.1320282 | 3294   | hydroxysteroid (17-beta) dehydrogenase 2                         |
| GO | hyaluronan catabolic process            | 1 | 2 | 0.1320282 | 3373   | hyaluronoglucosaminidase 1                                       |
| GO | hormone secretion                       | 1 | 2 | 0.1320282 | 338557 | G protein-coupled receptor 120                                   |
| GO | cilium movement                         | 1 | 2 | 0.1320282 | 345895 | radial spoke head 4 homolog A (Chlamydomonas)                    |
| GO | regulation of steroid hormone recept    | 1 | 2 | 0.1320282 | 3479   | insulin-like growth factor 1 (somatomedin C)                     |
| GO | Type I pneumocyte differentiation       | 1 | 2 | 0.1320282 | 3479   | insulin-like growth factor 1 (somatomedin C)                     |
| GO | protein tyrosine phosphatase activati   | 1 | 2 | 0.1320282 | 3486   | insulin-like growth factor binding protein 3                     |
| GO | interleukin-2 binding                   | 1 | 2 | 0.1320282 | 3561   | interleukin 2 receptor, gamma (severe combined immunodeficiency) |
| GO | interleukin-4 receptor activity         | 1 | 2 | 0.1320282 | 3561   | interleukin 2 receptor, gamma (severe combined immunodeficiency) |
| GO | interleukin-7 receptor activity         | 1 | 2 | 0.1320282 | 3561   | interleukin 2 receptor, gamma (severe combined immunodeficiency) |
| GO | neutrophil apoptosis                    | 1 | 2 | 0.1320282 | 3569   | interleukin 6 (interferon, beta 2)                               |
| GO | regulation of vascular endothelial grc  | 1 | 2 | 0.1320282 | 3569   | interleukin 6 (interferon, beta 2)                               |
| GO | interleukin-6 binding                   | 1 | 2 | 0.1320282 | 3570   | interleukin 6 receptor                                           |
| GO | interleukin-6 receptor activity         | 1 | 2 | 0.1320282 | 3570   | interleukin 6 receptor                                           |
| GO | cellular response to copper ion         | 1 | 2 | 0.1320282 | 358    | aquaporin 1 (Colton blood group)                                 |
| GO | cellular response to mercury ion        | 1 | 2 | 0.1320282 | 358    | aquaporin 1 (Colton blood group)                                 |
| GO | cerebrospinal fluid secretion           | 1 | 2 | 0.1320282 | 358    | aquaporin 1 (Colton blood group)                                 |
| GO | glycerol transmembrane transporter      | 1 | 2 | 0.1320282 | 358    | aquaporin 1 (Colton blood group)                                 |
| GO | intracellular cGMP activated cation cl  | 1 | 2 | 0.1320282 | 358    | aquaporin 1 (Colton blood group)                                 |
| GO | positive regulation of saliva secretion | 1 | 2 | 0.1320282 | 358    | aquaporin 1 (Colton blood group)                                 |
| GO | renal water transport                   | 1 | 2 | 0.1320282 | 358    | aquaporin 1 (Colton blood group)                                 |
| GO | interleukin-10 receptor activity        | 1 | 2 | 0.1320282 | 3587   | interleukin 10 receptor, alpha                                   |
| GO | 3-phosphoinositide-dependent prote      | 1 | 2 | 0.1320282 | 3643   | insulin receptor                                                 |
| GO | positive regulation of respiratory bur  | 1 | 2 | 0.1320282 | 3643   | insulin receptor                                                 |
| GO | ganglioside metabolic process           | 1 | 2 | 0.1320282 | 3696   | integrin, beta 8                                                 |
| GO | cellular response to potassium ion st   | 1 | 2 | 0.1320282 | 3725   | jun oncogene                                                     |
| GO | acetylcholine receptor regulator activ  | 1 | 2 | 0.1320282 | 375790 | agrin                                                            |
| GO | lymphoid progenitor cell differentiati  | 1 | 2 | 0.1320282 | 3815   | v-kit Hardy-Zuckerman 4 feline sarcoma viral oncogene homolog    |
| GO | positive regulation of transcription fr | 1 | 2 | 0.1320282 | 387496 | RAS-like, family 11, member A                                    |

|                                              |   |   |           |                                                                               |
|----------------------------------------------|---|---|-----------|-------------------------------------------------------------------------------|
| GO laminin-3 complex                         | 1 | 2 | 0.1320282 | 3913 laminin, beta 2 (laminin S)                                              |
| GO clathrin-coated endocytic vesicle mer     | 1 | 2 | 0.1320282 | 3949 low density lipoprotein receptor                                         |
| GO phospholipase activator activity          | 1 | 2 | 0.1320282 | 395 Rho GTPase activating protein 6                                           |
| GO leukotriene-C4 synthase activity          | 1 | 2 | 0.1320282 | 4056 leukotriene C4 synthase                                                  |
| GO paraxial mesoderm morphogenesis           | 1 | 2 | 0.1320282 | 4087 SMAD family member 2                                                     |
| GO cellular biogenic amine metabolic pro     | 1 | 2 | 0.1320282 | 4128 monoamine oxidase A                                                      |
| GO negative regulation of serotonin secr     | 1 | 2 | 0.1320282 | 4129 monoamine oxidase B                                                      |
| GO positive regulation of dopamine metab     | 1 | 2 | 0.1320282 | 4129 monoamine oxidase B                                                      |
| GO response to aluminum ion                  | 1 | 2 | 0.1320282 | 4129 monoamine oxidase B                                                      |
| GO slow-twitch skeletal muscle fiber con     | 1 | 2 | 0.1320282 | 4151 myoglobin                                                                |
| GO negative regulation of mast cell apop     | 1 | 2 | 0.1320282 | 4254 KIT ligand                                                               |
| GO positive regulation of mast cell prolif   | 1 | 2 | 0.1320282 | 4254 KIT ligand                                                               |
| GO cerebral cortex GABAergic interneurc      | 1 | 2 | 0.1320282 | 429 achaete-scute complex homolog 1 (Drosophila)                              |
| GO olfactory pit development                 | 1 | 2 | 0.1320282 | 429 achaete-scute complex homolog 1 (Drosophila)                              |
| GO subpallium neuron fate commitment         | 1 | 2 | 0.1320282 | 429 achaete-scute complex homolog 1 (Drosophila)                              |
| GO macrophage colony stimulating facto       | 1 | 2 | 0.1320282 | 4486 macrophage stimulating 1 receptor (c-met-related tyrosine kinase)        |
| GO Bcl3/NF-kappaB2 complex                   | 1 | 2 | 0.1320282 | 4791 nuclear factor of kappa light polypeptide gene enhancer in B-cells 2 (p4 |
| GO follicular dendritic cell differentiation | 1 | 2 | 0.1320282 | 4791 nuclear factor of kappa light polypeptide gene enhancer in B-cells 2 (p4 |
| GO nucleotide-binding oligomerization d      | 1 | 2 | 0.1320282 | 4792 nuclear factor of kappa light polypeptide gene enhancer in B-cells inhib |
| GO D-serine transport                        | 1 | 2 | 0.1320282 | 4794 nuclear factor of kappa light polypeptide gene enhancer in B-cells inhib |
| GO aconitate hydratase activity              | 1 | 2 | 0.1320282 | 48 aconitase 1, soluble                                                       |
| GO iron-responsive element binding           | 1 | 2 | 0.1320282 | 48 aconitase 1, soluble                                                       |
| GO negative regulation of photoreceptor      | 1 | 2 | 0.1320282 | 4851 Notch homolog 1, translocation-associated (Drosophila)                   |
| GO positive regulation of transcription of   | 1 | 2 | 0.1320282 | 4851 Notch homolog 1, translocation-associated (Drosophila)                   |
| GO response to insecticide                   | 1 | 2 | 0.1320282 | 4929 nuclear receptor subfamily 4, group A, member 2                          |
| GO nerve growth factor production            | 1 | 2 | 0.1320282 | 5046 proprotein convertase subtilisin/kexin type 6                            |
| GO dopamine uptake                           | 1 | 2 | 0.1320282 | 5071 Parkinson disease (autosomal recessive, juvenile) 2, parkin              |
| GO negative regulation of actin filament     | 1 | 2 | 0.1320282 | 5071 Parkinson disease (autosomal recessive, juvenile) 2, parkin              |
| GO negative regulation of release of cyto    | 1 | 2 | 0.1320282 | 5071 Parkinson disease (autosomal recessive, juvenile) 2, parkin              |
| GO protein K63-linked ubiquitination         | 1 | 2 | 0.1320282 | 5071 Parkinson disease (autosomal recessive, juvenile) 2, parkin              |
| GO embryonic body morphogenesis              | 1 | 2 | 0.1320282 | 50937 Cdon homolog (mouse)                                                    |
| GO response to chlorate                      | 1 | 2 | 0.1320282 | 5122 proprotein convertase subtilisin/kexin type 1                            |
| GO detection of light stimulus               | 1 | 2 | 0.1320282 | 5158 phosphodiesterase 6B, cGMP-specific, rod, beta                           |
| GO positive regulation of plasma membr       | 1 | 2 | 0.1320282 | 51703 acyl-CoA synthetase long-chain family member 5                          |
| GO cytoplasmic cyclin-dependent proteir      | 1 | 2 | 0.1320282 | 5218 cyclin-dependent kinase 14                                               |
| GO myoblast cell fate commitment             | 1 | 2 | 0.1320282 | 5307 paired-like homeodomain 1                                                |

|                                            |   |   |           |                                                                          |
|--------------------------------------------|---|---|-----------|--------------------------------------------------------------------------|
| GO PML body organization                   | 1 | 2 | 0.1320282 | 5371 promyelocytic leukemia                                              |
| GO regulation of MHC class I biosynthetic  | 1 | 2 | 0.1320282 | 5371 promyelocytic leukemia                                              |
| GO anatomical structure development        | 1 | 2 | 0.1320282 | 54361 wingless-type MMTV integration site family, member 4               |
| GO embryonic epithelial tube formation     | 1 | 2 | 0.1320282 | 54361 wingless-type MMTV integration site family, member 4               |
| GO somatotropin secreting cell differenti  | 1 | 2 | 0.1320282 | 54361 wingless-type MMTV integration site family, member 4               |
| GO hydroxymethylglutaryl-CoA lyase acti    | 1 | 2 | 0.1320282 | 54511 3-hydroxymethyl-3-methylglutaryl-Coenzyme A lyase-like 1           |
| GO BMP signaling pathway involved in h     | 1 | 2 | 0.1320282 | 5460 POU class 5 homeobox 1                                              |
| GO cardiac cell fate determination         | 1 | 2 | 0.1320282 | 5460 POU class 5 homeobox 1                                              |
| GO negative regulation of gene silencing   | 1 | 2 | 0.1320282 | 5460 POU class 5 homeobox 1                                              |
| GO negative regulation of receptor biosy   | 1 | 2 | 0.1320282 | 5465 peroxisome proliferator-activated receptor alpha                    |
| GO 1-alkylglycerophosphocholine O-acet     | 1 | 2 | 0.1320282 | 54947 lysophosphatidylcholine acyltransferase 2                          |
| GO germ-line stem cell maintenance         | 1 | 2 | 0.1320282 | 55124 piwi-like 2 (Drosophila)                                           |
| GO establishment of epithelial cell polari | 1 | 2 | 0.1320282 | 56288 par-3 partitioning defective 3 homolog (C. elegans)                |
| GO oxidoreductase activity, acting on sul  | 1 | 2 | 0.1320282 | 56605 ERO1-like beta (S. cerevisiae)                                     |
| GO activation of phospholipase A2 activit  | 1 | 2 | 0.1320282 | 56923 neuromedin U receptor 2                                            |
| GO neuromedin U receptor activity          | 1 | 2 | 0.1320282 | 56923 neuromedin U receptor 2                                            |
| GO inositol trisphosphate biosynthetic pr  | 1 | 2 | 0.1320282 | 5724 platelet-activating factor receptor                                 |
| GO prostaglandin F receptor activity       | 1 | 2 | 0.1320282 | 5737 prostaglandin F receptor (FP)                                       |
| GO negative regulation of epinephrine se   | 1 | 2 | 0.1320282 | 5742 prostaglandin-endoperoxide synthase 1 (prostaglandin G/H synthase a |
| GO negative regulation of norepinephrin    | 1 | 2 | 0.1320282 | 5742 prostaglandin-endoperoxide synthase 1 (prostaglandin G/H synthase a |
| GO prostaglandin-endoperoxide synthas      | 1 | 2 | 0.1320282 | 5742 prostaglandin-endoperoxide synthase 1 (prostaglandin G/H synthase a |
| GO cellular pigment accumulation           | 1 | 2 | 0.1320282 | 57619 shroom family member 3                                             |
| GO myosin V binding                        | 1 | 2 | 0.1320282 | 5873 RAB27A, member RAS oncogene family                                  |
| GO natural killer cell degranulation       | 1 | 2 | 0.1320282 | 5873 RAB27A, member RAS oncogene family                                  |
| GO embryonic retina morphogenesis in c     | 1 | 2 | 0.1320282 | 5950 retinol binding protein 4, plasma                                   |
| GO female genitalia morphogenesis          | 1 | 2 | 0.1320282 | 5950 retinol binding protein 4, plasma                                   |
| GO angiotensin maturation                  | 1 | 2 | 0.1320282 | 5972 renin                                                               |
| GO negative regulation of isotype switch   | 1 | 2 | 0.1320282 | 604 B-cell CLL/lymphoma 6                                                |
| GO negative regulation of mast cell cytok  | 1 | 2 | 0.1320282 | 604 B-cell CLL/lymphoma 6                                                |
| GO regulation of Rho GTPase activity       | 1 | 2 | 0.1320282 | 604 B-cell CLL/lymphoma 6                                                |
| GO 3-hydroxybutyrate dehydrogenase ac      | 1 | 2 | 0.1320282 | 622 3-hydroxybutyrate dehydrogenase, type 1                              |
| GO vitamin metabolic process               | 1 | 2 | 0.1320282 | 6256 retinoid X receptor, alpha                                          |
| GO 3-oxoacid CoA-transferase activity      | 1 | 2 | 0.1320282 | 64064 3-oxoacid CoA transferase 2                                        |
| GO ketone body catabolic process           | 1 | 2 | 0.1320282 | 64064 3-oxoacid CoA transferase 2                                        |
| GO positive regulation of biosynthetic pr  | 1 | 2 | 0.1320282 | 64127 nucleotide-binding oligomerization domain containing 2             |
| GO regulation of neutrophil chemotaxis     | 1 | 2 | 0.1320282 | 64127 nucleotide-binding oligomerization domain containing 2             |

|                                            |   |   |           |                                                                                |
|--------------------------------------------|---|---|-----------|--------------------------------------------------------------------------------|
| GO protein-disulfide reductase activity    | 1 | 2 | 0.1320282 | 64359 nucleoredoxin                                                            |
| GO cardiac septum development              | 1 | 2 | 0.1320282 | 652 bone morphogenetic protein 4                                               |
| GO cloacal septation                       | 1 | 2 | 0.1320282 | 652 bone morphogenetic protein 4                                               |
| GO positive regulation of kidney develop   | 1 | 2 | 0.1320282 | 652 bone morphogenetic protein 4                                               |
| GO telencephalon regionalization           | 1 | 2 | 0.1320282 | 652 bone morphogenetic protein 4                                               |
| GO urea transmembrane transporter act      | 1 | 2 | 0.1320282 | 6563 solute carrier family 14 (urea transporter), member 1 (Kidd blood group)  |
| GO proton-dependent oligopeptide seco      | 1 | 2 | 0.1320282 | 6564 solute carrier family 15 (oligopeptide transporter), member 1             |
| GO negative regulation of exocytosis       | 1 | 2 | 0.1320282 | 6622 synuclein, alpha (non A4 component of amyloid precursor)                  |
| GO negative regulation of platelet-derive  | 1 | 2 | 0.1320282 | 6622 synuclein, alpha (non A4 component of amyloid precursor)                  |
| GO positive regulation of inositol phosph  | 1 | 2 | 0.1320282 | 6622 synuclein, alpha (non A4 component of amyloid precursor)                  |
| GO regulation of glutamate secretion       | 1 | 2 | 0.1320282 | 6622 synuclein, alpha (non A4 component of amyloid precursor)                  |
| GO positive regulation of isotype switchi  | 1 | 2 | 0.1320282 | 6778 signal transducer and activator of transcription 6, interleukin-4 inducec |
| GO platelet degranulation                  | 1 | 2 | 0.1320282 | 6812 syntaxin binding protein 1                                                |
| GO syntaxin-2 binding                      | 1 | 2 | 0.1320282 | 6812 syntaxin binding protein 1                                                |
| GO lactate transmembrane transporter a     | 1 | 2 | 0.1320282 | 682 basigin (Ok blood group)                                                   |
| GO B cell receptor complex                 | 1 | 2 | 0.1320282 | 6850 spleen tyrosine kinase                                                    |
| GO beta selection                          | 1 | 2 | 0.1320282 | 6850 spleen tyrosine kinase                                                    |
| GO homeostasis of number of cells          | 1 | 2 | 0.1320282 | 7001 peroxiredoxin 2                                                           |
| GO negative regulation of oxygen and re    | 1 | 2 | 0.1320282 | 7001 peroxiredoxin 2                                                           |
| GO negative regulation of T cell different | 1 | 2 | 0.1320282 | 7001 peroxiredoxin 2                                                           |
| GO regulation of transcription involved ir | 1 | 2 | 0.1320282 | 7026 nuclear receptor subfamily 2, group F, member 2                           |
| GO response to follicle-stimulating horm   | 1 | 2 | 0.1320282 | 7049 transforming growth factor, beta receptor III                             |
| GO cell surface pattern recognition recep  | 1 | 2 | 0.1320282 | 7097 toll-like receptor 2                                                      |
| GO cellular response to diacylated bacter  | 1 | 2 | 0.1320282 | 7097 toll-like receptor 2                                                      |
| GO cellular response to triacylated bacte  | 1 | 2 | 0.1320282 | 7097 toll-like receptor 2                                                      |
| GO detection of diacylated bacterial lipo  | 1 | 2 | 0.1320282 | 7097 toll-like receptor 2                                                      |
| GO detection of triacylated bacterial lipo | 1 | 2 | 0.1320282 | 7097 toll-like receptor 2                                                      |
| GO positive regulation of interleukin-18 r | 1 | 2 | 0.1320282 | 7097 toll-like receptor 2                                                      |
| GO response to bacterial lipoprotein       | 1 | 2 | 0.1320282 | 7097 toll-like receptor 2                                                      |
| GO Toll-like receptor 1-Toll-like receptor | 1 | 2 | 0.1320282 | 7097 toll-like receptor 2                                                      |
| GO response to lipoteichoic acid           | 1 | 2 | 0.1320282 | 7099 toll-like receptor 4                                                      |
| GO positive regulation of activation of m  | 1 | 2 | 0.1320282 | 718 complement component 3                                                     |
| GO cellular response to interferon-gamrr   | 1 | 2 | 0.1320282 | 7474 wingless-type MMTV integration site family, member 5A                     |
| GO hypophysis morphogenesis                | 1 | 2 | 0.1320282 | 7474 wingless-type MMTV integration site family, member 5A                     |
| GO lateral sprouting involved in mamma     | 1 | 2 | 0.1320282 | 7474 wingless-type MMTV integration site family, member 5A                     |
| GO positive regulation of response to cyt  | 1 | 2 | 0.1320282 | 7474 wingless-type MMTV integration site family, member 5A                     |

|                                                    |   |   |           |                                                                              |
|----------------------------------------------------|---|---|-----------|------------------------------------------------------------------------------|
| GO myosin light chain binding                      | 1 | 2 | 0.1320282 | 7852 chemokine (C-X-C motif) receptor 4                                      |
| GO regulation of chemotaxis                        | 1 | 2 | 0.1320282 | 7852 chemokine (C-X-C motif) receptor 4                                      |
| GO Stn1-Ten1 complex                               | 1 | 2 | 0.1320282 | 80169 chromosome 17 open reading frame 68                                    |
| GO receptor recycling                              | 1 | 2 | 0.1320282 | 819 calcium modulating ligand                                                |
| GO positive regulation of circadian sleep,         | 1 | 2 | 0.1320282 | 834 caspase 1, apoptosis-related cysteine peptidase (interleukin 1, beta, co |
| GO stereocilia ankle link complex                  | 1 | 2 | 0.1320282 | 84059 G protein-coupled receptor 98                                          |
| GO actin nucleation                                | 1 | 2 | 0.1320282 | 85477 scinderin                                                              |
| GO positive regulation of secretion                | 1 | 2 | 0.1320282 | 85477 scinderin                                                              |
| GO two-component response regulator $\alpha$       | 1 | 2 | 0.1320282 | 8622 phosphodiesterase 8B                                                    |
| GO striated muscle thick filament                  | 1 | 2 | 0.1320282 | 8736 myomesin 1, 185kDa                                                      |
| GO initial segment                                 | 1 | 2 | 0.1320282 | 885 cholecystokinin                                                          |
| GO pantothenate metabolic process                  | 1 | 2 | 0.1320282 | 8875 vanin 2                                                                 |
| GO ATPase activity, coupled to transmembrane       | 1 | 2 | 0.1320282 | 8992 ATPase, H <sup>+</sup> transporting, lysosomal 9kDa, V0 subunit e1      |
| GO adenylylsulfate kinase activity                 | 1 | 2 | 0.1320282 | 9060 3'-phosphoadenosine 5'-phosphosulfate synthase 2                        |
| GO sulfate adenylyltransferase (ATP) activity      | 1 | 2 | 0.1320282 | 9060 3'-phosphoadenosine 5'-phosphosulfate synthase 2                        |
| GO activin receptor activity                       | 1 | 2 | 0.1320282 | 91 activin A receptor, type IB                                               |
| GO development of primary female sex organ         | 1 | 2 | 0.1320282 | 91 activin A receptor, type IB                                               |
| GO positive regulation of transporter activity     | 1 | 2 | 0.1320282 | 9143 synaptogyrin 3                                                          |
| GO lipoteichoic acid binding                       | 1 | 2 | 0.1320282 | 929 CD14 molecule                                                            |
| GO nicotinamide metabolic process                  | 1 | 2 | 0.1320282 | 93100 nicotinate phosphoribosyltransferase domain containing 1               |
| GO leg morphogenesis                               | 1 | 2 | 0.1320282 | 9496 T-box 4                                                                 |
| GO 6-phosphogluconolactonase activity              | 1 | 2 | 0.1320282 | 9563 hexose-6-phosphate dehydrogenase (glucose 1-dehydrogenase)              |
| GO glucose-6-phosphate dehydrogenase               | 1 | 2 | 0.1320282 | 9563 hexose-6-phosphate dehydrogenase (glucose 1-dehydrogenase)              |
| GO positive regulation of cholesterol biosynthesis | 1 | 2 | 0.1320282 | 9619 ATP-binding cassette, sub-family G (WHITE), member 1                    |
| GO toxin transporter activity                      | 1 | 2 | 0.1320282 | 9619 ATP-binding cassette, sub-family G (WHITE), member 1                    |
| GO regulation of skeletal muscle fiber development | 1 | 2 | 0.1320282 | 9734 histone deacetylase 9                                                   |
| GO microspike assembly                             | 1 | 2 | 0.1320282 | 9788 metastasis suppressor 1                                                 |
| GO clathrin heavy chain binding                    | 1 | 2 | 0.1320282 | 9892 synaptosomal-associated protein, 91kDa homolog (mouse)                  |
| GO positive regulation of embryonic development    | 1 | 2 | 0.1320282 | 9904 RNA binding motif protein 19                                            |
| GO sensory organ development                       | 1 | 2 | 0.1320282 | 9935 v-maf musculoaponeurotic fibrosarcoma oncogene homolog B (avian)        |
| GO L-ascorbate:sodium symporter activity           | 1 | 2 | 0.1320282 | 9962 solute carrier family 23 (nucleobase transporters), member 2            |
| GO L-ascorbic acid metabolic process               | 1 | 2 | 0.1320282 | 9962 solute carrier family 23 (nucleobase transporters), member 2            |
| GO L-ascorbic acid transporter activity            | 1 | 2 | 0.1320282 | 9962 solute carrier family 23 (nucleobase transporters), member 2            |
| GO L-ascorbic acid transport                       | 1 | 2 | 0.1320282 | 9962 solute carrier family 23 (nucleobase transporters), member 2            |
| GO molecular hydrogen transport                    | 1 | 2 | 0.1320282 | 9962 solute carrier family 23 (nucleobase transporters), member 2            |
| GO nucleobase transmembrane transporter activity   | 1 | 2 | 0.1320282 | 9962 solute carrier family 23 (nucleobase transporters), member 2            |

|                                            |   |    |           |                                                                           |
|--------------------------------------------|---|----|-----------|---------------------------------------------------------------------------|
| GO nucleobase transport                    | 1 | 2  | 0.1320282 | 9962 solute carrier family 23 (nucleobase transporters), member 2         |
| GO sodium-dependent L-ascorbate transp     | 1 | 2  | 0.1320282 | 9962 solute carrier family 23 (nucleobase transporters), member 2         |
| GO sodium-dependent multivitamin tran      | 1 | 2  | 0.1320282 | 9962 solute carrier family 23 (nucleobase transporters), member 2         |
| GO transepithelial L-ascorbic acid transp  | 1 | 2  | 0.1320282 | 9962 solute carrier family 23 (nucleobase transporters), member 2         |
| GO regulation of carbohydrate metabolic    | 1 | 2  | 0.1320282 | 9971 nuclear receptor subfamily 1, group H, member 4                      |
| GO respiratory gaseous exchange            | 4 | 29 | 0.1328826 | 1080 cystic fibrosis transmembrane conductance regulator (ATP-binding cas |
| GO respiratory gaseous exchange            | 4 | 29 | 0.1328826 | 1906 endothelin 1                                                         |
| GO respiratory gaseous exchange            | 4 | 29 | 0.1328826 | 4692 necdin homolog (mouse)                                               |
| GO respiratory gaseous exchange            | 4 | 29 | 0.1328826 | 9935 v-maf musculoaponeurotic fibrosarcoma oncogene homolog B (avian)     |
| GO positive regulation of ERK1 and ERK2    | 4 | 29 | 0.1328826 | 168667 BMP binding endothelial regulator                                  |
| GO positive regulation of ERK1 and ERK2    | 4 | 29 | 0.1328826 | 64127 nucleotide-binding oligomerization domain containing 2              |
| GO positive regulation of ERK1 and ERK2    | 4 | 29 | 0.1328826 | 652 bone morphogenetic protein 4                                          |
| GO positive regulation of ERK1 and ERK2    | 4 | 29 | 0.1328826 | 7099 toll-like receptor 4                                                 |
| GO negative regulation of neuron apoptc    | 6 | 51 | 0.1330528 | 183 angiotensinogen (serpin peptidase inhibitor, clade A, member 8)       |
| GO negative regulation of neuron apoptc    | 6 | 51 | 0.1330528 | 28996 homeodomain interacting protein kinase 2                            |
| GO negative regulation of neuron apoptc    | 6 | 51 | 0.1330528 | 3845 v-Ki-ras2 Kirsten rat sarcoma viral oncogene homolog                 |
| GO negative regulation of neuron apoptc    | 6 | 51 | 0.1330528 | 4929 nuclear receptor subfamily 4, group A, member 2                      |
| GO negative regulation of neuron apoptc    | 6 | 51 | 0.1330528 | 627 brain-derived neurotrophic factor                                     |
| GO negative regulation of neuron apoptc    | 6 | 51 | 0.1330528 | 6622 synuclein, alpha (non A4 component of amyloid precursor)             |
| GO male gonad development                  | 5 | 40 | 0.1350332 | 54361 wingless-type MMTV integration site family, member 4                |
| GO male gonad development                  | 5 | 40 | 0.1350332 | 5950 retinol binding protein 4, plasma                                    |
| GO male gonad development                  | 5 | 40 | 0.1350332 | 5972 renin                                                                |
| GO male gonad development                  | 5 | 40 | 0.1350332 | 7474 wingless-type MMTV integration site family, member 5A                |
| GO male gonad development                  | 5 | 40 | 0.1350332 | 8531 cold shock domain protein A                                          |
| GO regulation of signal transduction       | 3 | 19 | 0.1365361 | 10252 sprouty homolog 1, antagonist of FGF signaling (Drosophila)         |
| GO regulation of signal transduction       | 3 | 19 | 0.1365361 | 10253 sprouty homolog 2 (Drosophila)                                      |
| GO regulation of signal transduction       | 3 | 19 | 0.1365361 | 154043 CNKSR family member 3                                              |
| GO lipid particle                          | 3 | 19 | 0.1365361 | 123 perilipin 2                                                           |
| GO lipid particle                          | 3 | 19 | 0.1365361 | 5346 perilipin 1                                                          |
| GO lipid particle                          | 3 | 19 | 0.1365361 | 57104 patatin-like phospholipase domain containing 2                      |
| GO protein amino acid O-linked glycosyla   | 3 | 19 | 0.1365361 | 22906 trafficking protein, kinesin binding 1                              |
| GO protein amino acid O-linked glycosyla   | 3 | 19 | 0.1365361 | 2589 UDP-N-acetyl-alpha-D-galactosamine:polypeptide N-acetylgalactosami   |
| GO protein amino acid O-linked glycosyla   | 3 | 19 | 0.1365361 | 3949 low density lipoprotein receptor                                     |
| GO negative regulation of cell differentia | 3 | 19 | 0.1365361 | 2737 GLI family zinc finger 3                                             |
| GO negative regulation of cell differentia | 3 | 19 | 0.1365361 | 54361 wingless-type MMTV integration site family, member 4                |
| GO negative regulation of cell differentia | 3 | 19 | 0.1365361 | 604 B-cell CLL/lymphoma 6                                                 |

|                                           |    |     |           |                                                                                |
|-------------------------------------------|----|-----|-----------|--------------------------------------------------------------------------------|
| GO spleen development                     | 3  | 19  | 0.1365361 | 28982 feline leukemia virus subgroup C cellular receptor 1                     |
| GO spleen development                     | 3  | 19  | 0.1365361 | 3175 one cut homeobox 1                                                        |
| GO spleen development                     | 3  | 19  | 0.1365361 | 4791 nuclear factor of kappa light polypeptide gene enhancer in B-cells 2 (p4  |
| GO protein heterodimerization activity    | 18 | 199 | 0.1365571 | 11213 interleukin-1 receptor-associated kinase 3                               |
| GO protein heterodimerization activity    | 18 | 199 | 0.1365571 | 116113 forkhead box P4                                                         |
| GO protein heterodimerization activity    | 18 | 199 | 0.1365571 | 127343 diencephalon/mesencephalon homeobox 1                                   |
| GO protein heterodimerization activity    | 18 | 199 | 0.1365571 | 2026 enolase 2 (gamma, neuronal)                                               |
| GO protein heterodimerization activity    | 18 | 199 | 0.1365571 | 22807 IKAROS family zinc finger 2 (Helios)                                     |
| GO protein heterodimerization activity    | 18 | 199 | 0.1365571 | 2353 FBJ murine osteosarcoma viral oncogene homolog                            |
| GO protein heterodimerization activity    | 18 | 199 | 0.1365571 | 3164 nuclear receptor subfamily 4, group A, member 1                           |
| GO protein heterodimerization activity    | 18 | 199 | 0.1365571 | 3725 jun oncogene                                                              |
| GO protein heterodimerization activity    | 18 | 199 | 0.1365571 | 4056 leukotriene C4 synthase                                                   |
| GO protein heterodimerization activity    | 18 | 199 | 0.1365571 | 4170 myeloid cell leukemia sequence 1 (BCL2-related)                           |
| GO protein heterodimerization activity    | 18 | 199 | 0.1365571 | 4929 nuclear receptor subfamily 4, group A, member 2                           |
| GO protein heterodimerization activity    | 18 | 199 | 0.1365571 | 5025 purinergic receptor P2X, ligand-gated ion channel, 4                      |
| GO protein heterodimerization activity    | 18 | 199 | 0.1365571 | 51085 MLX interacting protein-like                                             |
| GO protein heterodimerization activity    | 18 | 199 | 0.1365571 | 5371 promyelocytic leukemia                                                    |
| GO protein heterodimerization activity    | 18 | 199 | 0.1365571 | 57186 Ral GTPase activating protein, alpha subunit 2 (catalytic)               |
| GO protein heterodimerization activity    | 18 | 199 | 0.1365571 | 7097 toll-like receptor 2                                                      |
| GO protein heterodimerization activity    | 18 | 199 | 0.1365571 | 8527 diacylglycerol kinase, delta 130kDa                                       |
| GO protein heterodimerization activity    | 18 | 199 | 0.1365571 | 9619 ATP-binding cassette, sub-family G (WHITE), member 1                      |
| GO defense response                       | 7  | 63  | 0.1372825 | 1471 cystatin C                                                                |
| GO defense response                       | 7  | 63  | 0.1372825 | 3783 potassium intermediate/small conductance calcium-activated channel,       |
| GO defense response                       | 7  | 63  | 0.1372825 | 4486 macrophage stimulating 1 receptor (c-met-related tyrosine kinase)         |
| GO defense response                       | 7  | 63  | 0.1372825 | 4599 myxovirus (influenza virus) resistance 1, interferon-inducible protein p: |
| GO defense response                       | 7  | 63  | 0.1372825 | 4600 myxovirus (influenza virus) resistance 2 (mouse)                          |
| GO defense response                       | 7  | 63  | 0.1372825 | 64127 nucleotide-binding oligomerization domain containing 2                   |
| GO defense response                       | 7  | 63  | 0.1372825 | 819 calcium modulating ligand                                                  |
| GO cell surface receptor linked signaling | 15 | 161 | 0.1375077 | 10288 leukocyte immunoglobulin-like receptor, subfamily B (with TM and ITIM    |
| GO cell surface receptor linked signaling | 15 | 161 | 0.1375077 | 154 adrenergic, beta-2-, receptor, surface                                     |
| GO cell surface receptor linked signaling | 15 | 161 | 0.1375077 | 1906 endothelin 1                                                              |
| GO cell surface receptor linked signaling | 15 | 161 | 0.1375077 | 2205 Fc fragment of IgE, high affinity I, receptor for; alpha polypeptide      |
| GO cell surface receptor linked signaling | 15 | 161 | 0.1375077 | 23529 cardiotrophin-like cytokine factor 1                                     |
| GO cell surface receptor linked signaling | 15 | 161 | 0.1375077 | 29126 CD274 molecule                                                           |
| GO cell surface receptor linked signaling | 15 | 161 | 0.1375077 | 4684 neural cell adhesion molecule 1                                           |
| GO cell surface receptor linked signaling | 15 | 161 | 0.1375077 | 5362 plexin A2                                                                 |



|    |                                        |    |     |           |                                                                           |
|----|----------------------------------------|----|-----|-----------|---------------------------------------------------------------------------|
| GO | cell surface receptor linked signaling | 15 | 161 | 0.1375077 | 573 BCL2-associated athanogene                                            |
| GO | cell surface receptor linked signaling | 15 | 161 | 0.1375077 | 6750 somatostatin                                                         |
| GO | cell surface receptor linked signaling | 15 | 161 | 0.1375077 | 6751 somatostatin receptor 1                                              |
| GO | cell surface receptor linked signaling | 15 | 161 | 0.1375077 | 682 basigin (Ok blood group)                                              |
| GO | cell surface receptor linked signaling | 15 | 161 | 0.1375077 | 7133 tumor necrosis factor receptor superfamily, member 1B                |
| GO | cell surface receptor linked signaling | 15 | 161 | 0.1375077 | 8519 interferon induced transmembrane protein 1 (9-27)                    |
| GO | cell surface receptor linked signaling | 15 | 161 | 0.1375077 | 929 CD14 molecule                                                         |
| GO | actin binding                          | 24 | 278 | 0.141386  | 11078 TRIO and F-actin binding protein                                    |
| GO | actin binding                          | 24 | 278 | 0.141386  | 2039 erythrocyte membrane protein band 4.9 (dematin)                      |
| GO | actin binding                          | 24 | 278 | 0.141386  | 22998 LIM and calponin homology domains 1                                 |
| GO | actin binding                          | 24 | 278 | 0.141386  | 23500 dishevelled associated activator of morphogenesis 2                 |
| GO | actin binding                          | 24 | 278 | 0.141386  | 2638 group-specific component (vitamin D binding protein)                 |
| GO | actin binding                          | 24 | 278 | 0.141386  | 3983 actin binding LIM protein 1                                          |
| GO | actin binding                          | 24 | 278 | 0.141386  | 4638 myosin light chain kinase                                            |
| GO | actin binding                          | 24 | 278 | 0.141386  | 4645 myosin VB                                                            |
| GO | actin binding                          | 24 | 278 | 0.141386  | 51168 myosin XVA                                                          |
| GO | actin binding                          | 24 | 278 | 0.141386  | 5304 prolactin-induced protein                                            |
| GO | actin binding                          | 24 | 278 | 0.141386  | 53827 FXFD domain containing ion transport regulator 5                    |
| GO | actin binding                          | 24 | 278 | 0.141386  | 55740 enabled homolog (Drosophila)                                        |
| GO | actin binding                          | 24 | 278 | 0.141386  | 57619 shroom family member 3                                              |
| GO | actin binding                          | 24 | 278 | 0.141386  | 6521 solute carrier family 4, anion exchanger, member 1 (erythrocyte memb |
| GO | actin binding                          | 24 | 278 | 0.141386  | 6710 spectrin, beta, erythrocytic                                         |
| GO | actin binding                          | 24 | 278 | 0.141386  | 7111 tropomodulin 1                                                       |
| GO | actin binding                          | 24 | 278 | 0.141386  | 7170 tropomyosin 3                                                        |
| GO | actin binding                          | 24 | 278 | 0.141386  | 7464 coronin, actin binding protein, 2A                                   |
| GO | actin binding                          | 24 | 278 | 0.141386  | 7852 chemokine (C-X-C motif) receptor 4                                   |
| GO | actin binding                          | 24 | 278 | 0.141386  | 79789 calmin (calponin-like, transmembrane)                               |
| GO | actin binding                          | 24 | 278 | 0.141386  | 85462 FH2 domain containing 1                                             |
| GO | actin binding                          | 24 | 278 | 0.141386  | 85477 scinderin                                                           |
| GO | actin binding                          | 24 | 278 | 0.141386  | 9087 thymosin beta 4, Y-linked                                            |
| GO | actin binding                          | 24 | 278 | 0.141386  | 9749 phosphatase and actin regulator 2                                    |
| GO | monooxygenase activity                 | 6  | 52  | 0.1422747 | 1558 cytochrome P450, family 2, subfamily C, polypeptide 8                |
| GO | monooxygenase activity                 | 6  | 52  | 0.1422747 | 1559 cytochrome P450, family 2, subfamily C, polypeptide 9                |
| GO | monooxygenase activity                 | 6  | 52  | 0.1422747 | 1571 cytochrome P450, family 2, subfamily E, polypeptide 1                |
| GO | monooxygenase activity                 | 6  | 52  | 0.1422747 | 1577 cytochrome P450, family 3, subfamily A, polypeptide 5                |
| GO | monooxygenase activity                 | 6  | 52  | 0.1422747 | 5066 peptidylglycine alpha-amidating monooxygenase                        |

|    |                                       |    |     |           |                                                                           |
|----|---------------------------------------|----|-----|-----------|---------------------------------------------------------------------------|
| GO | monooxygenase activity                | 6  | 52  | 0.1422747 | 6916 thromboxane A synthase 1 (platelet)                                  |
| GO | central nervous system development    | 10 | 100 | 0.1450876 | 10231 regulator of calcineurin 2                                          |
| GO | central nervous system development    | 10 | 100 | 0.1450876 | 127343 diencephalon/mesencephalon homeobox 1                              |
| GO | central nervous system development    | 10 | 100 | 0.1450876 | 1821 dystrophin related protein 2                                         |
| GO | central nervous system development    | 10 | 100 | 0.1450876 | 1822 atrophin 1                                                           |
| GO | central nervous system development    | 10 | 100 | 0.1450876 | 4692 necdin homolog (mouse)                                               |
| GO | central nervous system development    | 10 | 100 | 0.1450876 | 5071 Parkinson disease (autosomal recessive, juvenile) 2, parkin          |
| GO | central nervous system development    | 10 | 100 | 0.1450876 | 56923 neuromedin U receptor 2                                             |
| GO | central nervous system development    | 10 | 100 | 0.1450876 | 57453 Down syndrome cell adhesion molecule like 1                         |
| GO | central nervous system development    | 10 | 100 | 0.1450876 | 8646 chordin                                                              |
| GO | central nervous system development    | 10 | 100 | 0.1450876 | 91 activin A receptor, type IB                                            |
| GO | one-carbon metabolic process          | 4  | 30  | 0.1455367 | 11238 carbonic anhydrase VB, mitochondrial                                |
| GO | one-carbon metabolic process          | 4  | 30  | 0.1455367 | 23382 adenosylhomocysteinase-like 2                                       |
| GO | one-carbon metabolic process          | 4  | 30  | 0.1455367 | 760 carbonic anhydrase II                                                 |
| GO | one-carbon metabolic process          | 4  | 30  | 0.1455367 | 771 carbonic anhydrase XII                                                |
| GO | response to organic nitrogen          | 4  | 30  | 0.1455367 | 1571 cytochrome P450, family 2, subfamily E, polypeptide 1                |
| GO | response to organic nitrogen          | 4  | 30  | 0.1455367 | 205 adenylate kinase 3-like 1                                             |
| GO | response to organic nitrogen          | 4  | 30  | 0.1455367 | 5742 prostaglandin-endoperoxide synthase 1 (prostaglandin G/H synthase a) |
| GO | response to organic nitrogen          | 4  | 30  | 0.1455367 | 6750 somatostatin                                                         |
| GO | insulin receptor binding              | 4  | 30  | 0.1455367 | 3479 insulin-like growth factor 1 (somatomedin C)                         |
| GO | insulin receptor binding              | 4  | 30  | 0.1455367 | 5295 phosphoinositide-3-kinase, regulatory subunit 1 (alpha)              |
| GO | insulin receptor binding              | 4  | 30  | 0.1455367 | 55816 docking protein 5                                                   |
| GO | insulin receptor binding              | 4  | 30  | 0.1455367 | 8660 insulin receptor substrate 2                                         |
| GO | negative regulation of protein kinase | 5  | 41  | 0.1456895 | 10221 tribbles homolog 1 (Drosophila)                                     |
| GO | negative regulation of protein kinase | 5  | 41  | 0.1456895 | 10912 growth arrest and DNA-damage-inducible, gamma                       |
| GO | negative regulation of protein kinase | 5  | 41  | 0.1456895 | 28951 tribbles homolog 2 (Drosophila)                                     |
| GO | negative regulation of protein kinase | 5  | 41  | 0.1456895 | 4616 growth arrest and DNA-damage-inducible, beta                         |
| GO | negative regulation of protein kinase | 5  | 41  | 0.1456895 | 64798 DEP domain containing 6                                             |
| GO | cholesterol homeostasis               | 5  | 41  | 0.1456895 | 255738 proprotein convertase subtilisin/kexin type 9                      |
| GO | cholesterol homeostasis               | 5  | 41  | 0.1456895 | 26119 low density lipoprotein receptor adaptor protein 1                  |
| GO | cholesterol homeostasis               | 5  | 41  | 0.1456895 | 29116 myosin regulatory light chain interacting protein                   |
| GO | cholesterol homeostasis               | 5  | 41  | 0.1456895 | 3949 low density lipoprotein receptor                                     |
| GO | cholesterol homeostasis               | 5  | 41  | 0.1456895 | 9619 ATP-binding cassette, sub-family G (WHITE), member 1                 |
| GO | death receptor binding                | 2  | 10  | 0.145899  | 10116 fem-1 homolog b (C. elegans)                                        |
| GO | death receptor binding                | 2  | 10  | 0.145899  | 9966 tumor necrosis factor (ligand) superfamily, member 15                |
| GO | negative regulation of ossification   | 2  | 10  | 0.145899  | 154 adrenergic, beta-2-, receptor, surface                                |

|    |                                        |   |    |          |                                                                             |
|----|----------------------------------------|---|----|----------|-----------------------------------------------------------------------------|
| GO | negative regulation of ossification    | 2 | 10 | 0.145899 | 799 calcitonin receptor                                                     |
| GO | phagocytic vesicle membrane            | 2 | 10 | 0.145899 | 1755 deleted in malignant brain tumors 1                                    |
| GO | phagocytic vesicle membrane            | 2 | 10 | 0.145899 | 80223 RAB11 family interacting protein 1 (class I)                          |
| GO | receptor internalization               | 2 | 10 | 0.145899 | 1785 dynamin 2                                                              |
| GO | receptor internalization               | 2 | 10 | 0.145899 | 6622 synuclein, alpha (non A4 component of amyloid precursor)               |
| GO | elevation of cytosolic calcium ion con | 2 | 10 | 0.145899 | 1813 dopamine receptor D2                                                   |
| GO | elevation of cytosolic calcium ion con | 2 | 10 | 0.145899 | 1906 endothelin 1                                                           |
| GO | cytoplasmic part                       | 2 | 10 | 0.145899 | 183 angiotensinogen (serpin peptidase inhibitor, clade A, member 8)         |
| GO | cytoplasmic part                       | 2 | 10 | 0.145899 | 5972 renin                                                                  |
| GO | negative regulation of blood coagulat  | 2 | 10 | 0.145899 | 1906 endothelin 1                                                           |
| GO | negative regulation of blood coagulat  | 2 | 10 | 0.145899 | 3827 kininogen 1                                                            |
| GO | negative regulation of hormone secre   | 2 | 10 | 0.145899 | 1906 endothelin 1                                                           |
| GO | negative regulation of hormone secre   | 2 | 10 | 0.145899 | 4886 neuropeptide Y receptor Y1                                             |
| GO | heparan sulfate proteoglycan binding   | 2 | 10 | 0.145899 | 2239 glypican 4                                                             |
| GO | heparan sulfate proteoglycan binding   | 2 | 10 | 0.145899 | 2262 glypican 5                                                             |
| GO | vascular endothelial growth factor re  | 2 | 10 | 0.145899 | 2296 forkhead box C1                                                        |
| GO | vascular endothelial growth factor re  | 2 | 10 | 0.145899 | 2303 forkhead box C2 (MFH-1, mesenchyme forkhead 1)                         |
| GO | regulation of exocytosis               | 2 | 10 | 0.145899 | 25837 RAB26, member RAS oncogene family                                     |
| GO | regulation of exocytosis               | 2 | 10 | 0.145899 | 6857 synaptotagmin I                                                        |
| GO | phosphotyrosine binding                | 2 | 10 | 0.145899 | 26119 low density lipoprotein receptor adaptor protein 1                    |
| GO | phosphotyrosine binding                | 2 | 10 | 0.145899 | 5774 protein tyrosine phosphatase, non-receptor type 3                      |
| GO | limb morphogenesis                     | 2 | 10 | 0.145899 | 2737 GLI family zinc finger 3                                               |
| GO | limb morphogenesis                     | 2 | 10 | 0.145899 | 28982 feline leukemia virus subgroup C cellular receptor 1                  |
| GO | positive regulation of glycogen biosyr | 2 | 10 | 0.145899 | 3643 insulin receptor                                                       |
| GO | positive regulation of glycogen biosyr | 2 | 10 | 0.145899 | 8660 insulin receptor substrate 2                                           |
| GO | lipoprotein binding                    | 2 | 10 | 0.145899 | 3949 low density lipoprotein receptor                                       |
| GO | lipoprotein binding                    | 2 | 10 | 0.145899 | 7097 toll-like receptor 2                                                   |
| GO | receptor tyrosine kinase binding       | 2 | 10 | 0.145899 | 399694 SHC (Src homology 2 domain containing) family, member 4              |
| GO | receptor tyrosine kinase binding       | 2 | 10 | 0.145899 | 83394 PITPNM family member 3                                                |
| GO | transforming growth factor beta rece   | 2 | 10 | 0.145899 | 4087 SMAD family member 2                                                   |
| GO | transforming growth factor beta rece   | 2 | 10 | 0.145899 | 7049 transforming growth factor, beta receptor III                          |
| GO | limb development                       | 2 | 10 | 0.145899 | 4223 mesenchyme homeobox 2                                                  |
| GO | limb development                       | 2 | 10 | 0.145899 | 7026 nuclear receptor subfamily 2, group F, member 2                        |
| GO | CTP biosynthetic process               | 2 | 10 | 0.145899 | 51314 thioredoxin domain containing 3 (spermatozoa)                         |
| GO | CTP biosynthetic process               | 2 | 10 | 0.145899 | 8382 non-metastatic cells 5, protein expressed in (nucleoside-diphosphate k |
| GO | transforming growth factor beta bind   | 2 | 10 | 0.145899 | 7049 transforming growth factor, beta receptor III                          |

|                                         |    |     |           |                                                                               |
|-----------------------------------------|----|-----|-----------|-------------------------------------------------------------------------------|
| GO transforming growth factor beta binc | 2  | 10  | 0.145899  | 94 activin A receptor type II-like 1                                          |
| GO potassium ion transport              | 14 | 151 | 0.1514828 | 157855 potassium channel, subfamily U, member 1                               |
| GO potassium ion transport              | 14 | 151 | 0.1514828 | 27345 potassium large conductance calcium-activated channel, subfamily M,     |
| GO potassium ion transport              | 14 | 151 | 0.1514828 | 343450 potassium channel, subfamily T, member 2                               |
| GO potassium ion transport              | 14 | 151 | 0.1514828 | 358 aquaporin 1 (Colton blood group)                                          |
| GO potassium ion transport              | 14 | 151 | 0.1514828 | 3759 potassium inwardly-rectifying channel, subfamily J, member 2             |
| GO potassium ion transport              | 14 | 151 | 0.1514828 | 3773 potassium inwardly-rectifying channel, subfamily J, member 16            |
| GO potassium ion transport              | 14 | 151 | 0.1514828 | 3775 potassium channel, subfamily K, member 1                                 |
| GO potassium ion transport              | 14 | 151 | 0.1514828 | 3782 potassium intermediate/small conductance calcium-activated channel,      |
| GO potassium ion transport              | 14 | 151 | 0.1514828 | 3783 potassium intermediate/small conductance calcium-activated channel,      |
| GO potassium ion transport              | 14 | 151 | 0.1514828 | 3786 potassium voltage-gated channel, KQT-like subfamily, member 3            |
| GO potassium ion transport              | 14 | 151 | 0.1514828 | 3790 potassium voltage-gated channel, delayed-rectifier, subfamily S, memb    |
| GO potassium ion transport              | 14 | 151 | 0.1514828 | 84561 solute carrier family 12 (potassium/chloride transporters), member 8    |
| GO potassium ion transport              | 14 | 151 | 0.1514828 | 8514 potassium voltage-gated channel, shaker-related subfamily, beta mem      |
| GO potassium ion transport              | 14 | 151 | 0.1514828 | 8645 potassium channel, subfamily K, member 5                                 |
| GO GTP binding                          | 29 | 347 | 0.1522536 | 115273 RAB42, member RAS oncogene family                                      |
| GO GTP binding                          | 29 | 347 | 0.1522536 | 1785 dynamin 2                                                                |
| GO GTP binding                          | 29 | 347 | 0.1522536 | 1915 eukaryotic translation elongation factor 1 alpha 1                       |
| GO GTP binding                          | 29 | 347 | 0.1522536 | 1983 eukaryotic translation initiation factor 5                               |
| GO GTP binding                          | 29 | 347 | 0.1522536 | 205 adenylate kinase 3-like 1                                                 |
| GO GTP binding                          | 29 | 347 | 0.1522536 | 23348 dedicator of cytokinesis 9                                              |
| GO GTP binding                          | 29 | 347 | 0.1522536 | 23682 RAB38, member RAS oncogene family                                       |
| GO GTP binding                          | 29 | 347 | 0.1522536 | 25837 RAB26, member RAS oncogene family                                       |
| GO GTP binding                          | 29 | 347 | 0.1522536 | 26157 GTPase, IMAP family member 2                                            |
| GO GTP binding                          | 29 | 347 | 0.1522536 | 2633 guanylate binding protein 1, interferon-inducible, 67kDa                 |
| GO GTP binding                          | 29 | 347 | 0.1522536 | 2634 guanylate binding protein 2, interferon-inducible                        |
| GO GTP binding                          | 29 | 347 | 0.1522536 | 2635 guanylate binding protein 3                                              |
| GO GTP binding                          | 29 | 347 | 0.1522536 | 2769 guanine nucleotide binding protein (G protein), alpha 15 (Gq class)      |
| GO GTP binding                          | 29 | 347 | 0.1522536 | 3643 insulin receptor                                                         |
| GO GTP binding                          | 29 | 347 | 0.1522536 | 379 ADP-ribosylation factor-like 4D                                           |
| GO GTP binding                          | 29 | 347 | 0.1522536 | 3845 v-Ki-ras2 Kirsten rat sarcoma viral oncogene homolog                     |
| GO GTP binding                          | 29 | 347 | 0.1522536 | 387496 RAS-like, family 11, member A                                          |
| GO GTP binding                          | 29 | 347 | 0.1522536 | 392509 ADP-ribosylation factor-like 13A                                       |
| GO GTP binding                          | 29 | 347 | 0.1522536 | 4599 myxovirus (influenza virus) resistance 1, interferon-inducible protein p |
| GO GTP binding                          | 29 | 347 | 0.1522536 | 4600 myxovirus (influenza virus) resistance 2 (mouse)                         |
| GO GTP binding                          | 29 | 347 | 0.1522536 | 51285 RAS-like, family 12                                                     |

|    |                                       |    |     |           |                                                                               |
|----|---------------------------------------|----|-----|-----------|-------------------------------------------------------------------------------|
| GO | GTP binding                           | 29 | 347 | 0.1522536 | 51655 RAS, dexamethasone-induced 1                                            |
| GO | GTP binding                           | 29 | 347 | 0.1522536 | 54769 DIRAS family, GTP-binding RAS-like 2                                    |
| GO | GTP binding                           | 29 | 347 | 0.1522536 | 56923 neuromedin U receptor 2                                                 |
| GO | GTP binding                           | 29 | 347 | 0.1522536 | 57799 RAB40C, member RAS oncogene family                                      |
| GO | GTP binding                           | 29 | 347 | 0.1522536 | 5873 RAB27A, member RAS oncogene family                                       |
| GO | GTP binding                           | 29 | 347 | 0.1522536 | 7984 Rho guanine nucleotide exchange factor (GEF) 5                           |
| GO | GTP binding                           | 29 | 347 | 0.1522536 | 85004 RAS-like, estrogen-regulated, growth inhibitor                          |
| GO | GTP binding                           | 29 | 347 | 0.1522536 | 9567 GTP binding protein 1                                                    |
| GO | B cell activation                     | 3  | 20  | 0.1529228 | 10014 histone deacetylase 5                                                   |
| GO | B cell activation                     | 3  | 20  | 0.1529228 | 684 bone marrow stromal cell antigen 2                                        |
| GO | B cell activation                     | 3  | 20  | 0.1529228 | 9734 histone deacetylase 9                                                    |
| GO | positive regulation of bone mineraliz | 3  | 20  | 0.1529228 | 154 adrenergic, beta-2-, receptor, surface                                    |
| GO | positive regulation of bone mineraliz | 3  | 20  | 0.1529228 | 652 bone morphogenetic protein 4                                              |
| GO | positive regulation of bone mineraliz | 3  | 20  | 0.1529228 | 91461 protein kinase domain containing, cytoplasmic homolog (mouse)           |
| GO | adult walking behavior                | 3  | 20  | 0.1529228 | 1813 dopamine receptor D2                                                     |
| GO | adult walking behavior                | 3  | 20  | 0.1529228 | 2055 ceroid-lipofuscinosis, neuronal 8 (epilepsy, progressive with mental ret |
| GO | adult walking behavior                | 3  | 20  | 0.1529228 | 28996 homeodomain interacting protein kinase 2                                |
| GO | response to amphetamine               | 3  | 20  | 0.1529228 | 1813 dopamine receptor D2                                                     |
| GO | response to amphetamine               | 3  | 20  | 0.1529228 | 1815 dopamine receptor D4                                                     |
| GO | response to amphetamine               | 3  | 20  | 0.1529228 | 4929 nuclear receptor subfamily 4, group A, member 2                          |
| GO | positive regulation of mitosis        | 3  | 20  | 0.1529228 | 1906 endothelin 1                                                             |
| GO | positive regulation of mitosis        | 3  | 20  | 0.1529228 | 3479 insulin-like growth factor 1 (somatomedin C)                             |
| GO | positive regulation of mitosis        | 3  | 20  | 0.1529228 | 3643 insulin receptor                                                         |
| GO | positive regulation of neuron apopto  | 3  | 20  | 0.1529228 | 255738 proprotein convertase subtilisin/kexin type 9                          |
| GO | positive regulation of neuron apopto  | 3  | 20  | 0.1529228 | 3725 jun oncogene                                                             |
| GO | positive regulation of neuron apopto  | 3  | 20  | 0.1529228 | 429 achaete-scute complex homolog 1 (Drosophila)                              |
| GO | tissue regeneration                   | 3  | 20  | 0.1529228 | 3484 insulin-like growth factor binding protein 1                             |
| GO | tissue regeneration                   | 3  | 20  | 0.1529228 | 4851 Notch homolog 1, translocation-associated (Drosophila)                   |
| GO | tissue regeneration                   | 3  | 20  | 0.1529228 | 4853 Notch homolog 2 (Drosophila)                                             |
| GO | response to steroid hormone stimulu   | 3  | 20  | 0.1529228 | 4015 lysyl oxidase                                                            |
| GO | response to steroid hormone stimulu   | 3  | 20  | 0.1529228 | 4129 monoamine oxidase B                                                      |
| GO | response to steroid hormone stimulu   | 3  | 20  | 0.1529228 | 6750 somatostatin                                                             |
| GO | L-ascorbic acid binding               | 3  | 20  | 0.1529228 | 5066 peptidylglycine alpha-amidating monooxygenase                            |
| GO | L-ascorbic acid binding               | 3  | 20  | 0.1529228 | 5351 procollagen-lysine 1, 2-oxoglutarate 5-dioxygenase 1                     |
| GO | L-ascorbic acid binding               | 3  | 20  | 0.1529228 | 54681 prolyl 4-hydroxylase, transmembrane (endoplasmic reticulum)             |
| GO | actin cytoskeleton organization       | 11 | 114 | 0.1558943 | 10435 CDC42 effector protein (Rho GTPase binding) 2                           |

|    |                                      |    |     |           |                                                                                |
|----|--------------------------------------|----|-----|-----------|--------------------------------------------------------------------------------|
| GO | actin cytoskeleton organization      | 11 | 114 | 0.1558943 | 152273 FYVE, RhoGEF and PH domain containing 5                                 |
| GO | actin cytoskeleton organization      | 11 | 114 | 0.1558943 | 23092 Rho GTPase activating protein 26                                         |
| GO | actin cytoskeleton organization      | 11 | 114 | 0.1558943 | 23500 dishevelled associated activator of morphogenesis 2                      |
| GO | actin cytoskeleton organization      | 11 | 114 | 0.1558943 | 3845 v-Ki-ras2 Kirsten rat sarcoma viral oncogene homolog                      |
| GO | actin cytoskeleton organization      | 11 | 114 | 0.1558943 | 57619 shroom family member 3                                                   |
| GO | actin cytoskeleton organization      | 11 | 114 | 0.1558943 | 604 B-cell CLL/lymphoma 6                                                      |
| GO | actin cytoskeleton organization      | 11 | 114 | 0.1558943 | 81788 NUAK family, SNF1-like kinase, 2                                         |
| GO | actin cytoskeleton organization      | 11 | 114 | 0.1558943 | 85462 FH2 domain containing 1                                                  |
| GO | actin cytoskeleton organization      | 11 | 114 | 0.1558943 | 9087 thymosin beta 4, Y-linked                                                 |
| GO | actin cytoskeleton organization      | 11 | 114 | 0.1558943 | 9788 metastasis suppressor 1                                                   |
| GO | regulation of cell cycle             | 5  | 42  | 0.1566921 | 10912 growth arrest and DNA-damage-inducible, gamma                            |
| GO | regulation of cell cycle             | 5  | 42  | 0.1566921 | 2122 MDS1 and EVI1 complex locus                                               |
| GO | regulation of cell cycle             | 5  | 42  | 0.1566921 | 3725 jun oncogene                                                              |
| GO | regulation of cell cycle             | 5  | 42  | 0.1566921 | 3726 jun B proto-oncogene                                                      |
| GO | regulation of cell cycle             | 5  | 42  | 0.1566921 | 4616 growth arrest and DNA-damage-inducible, beta                              |
| GO | calcium-dependent protein binding    | 4  | 31  | 0.1586374 | 1755 deleted in malignant brain tumors 1                                       |
| GO | calcium-dependent protein binding    | 4  | 31  | 0.1586374 | 311 annexin A11                                                                |
| GO | calcium-dependent protein binding    | 4  | 31  | 0.1586374 | 5648 mannan-binding lectin serine peptidase 1 (C4/C2 activating component      |
| GO | calcium-dependent protein binding    | 4  | 31  | 0.1586374 | 6857 synaptotagmin I                                                           |
| GO | transcription from RNA polymerase II | 16 | 178 | 0.1591611 | 1999 E74-like factor 3 (ets domain transcription factor, epithelial-specific ) |
| GO | transcription from RNA polymerase II | 16 | 178 | 0.1591611 | 2115 ets variant 1                                                             |
| GO | transcription from RNA polymerase II | 16 | 178 | 0.1591611 | 23650 tripartite motif-containing 29                                           |
| GO | transcription from RNA polymerase II | 16 | 178 | 0.1591611 | 3131 hepatic leukemia factor                                                   |
| GO | transcription from RNA polymerase II | 16 | 178 | 0.1591611 | 3659 interferon regulatory factor 1                                            |
| GO | transcription from RNA polymerase II | 16 | 178 | 0.1591611 | 4783 nuclear factor, interleukin 3 regulated                                   |
| GO | transcription from RNA polymerase II | 16 | 178 | 0.1591611 | 4784 nuclear factor I/X (CCAAT-binding transcription factor)                   |
| GO | transcription from RNA polymerase II | 16 | 178 | 0.1591611 | 51621 Kruppel-like factor 13                                                   |
| GO | transcription from RNA polymerase II | 16 | 178 | 0.1591611 | 5465 peroxisome proliferator-activated receptor alpha                          |
| GO | transcription from RNA polymerase II | 16 | 178 | 0.1591611 | 55870 ash1 (absent, small, or homeotic)-like (Drosophila)                      |
| GO | transcription from RNA polymerase II | 16 | 178 | 0.1591611 | 6239 ras responsive element binding protein 1                                  |
| GO | transcription from RNA polymerase II | 16 | 178 | 0.1591611 | 7227 trichorhinophalangeal syndrome I                                          |
| GO | transcription from RNA polymerase II | 16 | 178 | 0.1591611 | 80714 pre-B-cell leukemia homeobox 4                                           |
| GO | transcription from RNA polymerase II | 16 | 178 | 0.1591611 | 8462 Kruppel-like factor 11                                                    |
| GO | transcription from RNA polymerase II | 16 | 178 | 0.1591611 | 8543 LIM domain only 4                                                         |
| GO | transcription from RNA polymerase II | 16 | 178 | 0.1591611 | 8848 TSC22 domain family, member 1                                             |
| GO | Wnt receptor signaling pathway       | 9  | 90  | 0.161066  | 10023 frequently rearranged in advanced T-cell lymphomas                       |

|    |                                       |    |     |           |                                                                              |
|----|---------------------------------------|----|-----|-----------|------------------------------------------------------------------------------|
| GO | Wnt receptor signaling pathway        | 9  | 90  | 0.161066  | 23043 TRAF2 and NCK interacting kinase                                       |
| GO | Wnt receptor signaling pathway        | 9  | 90  | 0.161066  | 4163 mutated in colorectal cancers                                           |
| GO | Wnt receptor signaling pathway        | 9  | 90  | 0.161066  | 4286 microphthalmia-associated transcription factor                          |
| GO | Wnt receptor signaling pathway        | 9  | 90  | 0.161066  | 5218 cyclin-dependent kinase 14                                              |
| GO | Wnt receptor signaling pathway        | 9  | 90  | 0.161066  | 64359 nucleoredoxin                                                          |
| GO | Wnt receptor signaling pathway        | 9  | 90  | 0.161066  | 7089 transducin-like enhancer of split 2 (E(sp1) homolog, Drosophila)        |
| GO | Wnt receptor signaling pathway        | 9  | 90  | 0.161066  | 7090 transducin-like enhancer of split 3 (E(sp1) homolog, Drosophila)        |
| GO | Wnt receptor signaling pathway        | 9  | 90  | 0.161066  | 79971 wntless homolog (Drosophila)                                           |
| GO | serine-type endopeptidase inhibitor a | 9  | 90  | 0.161066  | 153218 serine peptidase inhibitor, Kazal type 13 (putative)                  |
| GO | serine-type endopeptidase inhibitor a | 9  | 90  | 0.161066  | 183 angiotensinogen (serpin peptidase inhibitor, clade A, member 8)          |
| GO | serine-type endopeptidase inhibitor a | 9  | 90  | 0.161066  | 404203 serine peptidase inhibitor, Kazal type 6                              |
| GO | serine-type endopeptidase inhibitor a | 9  | 90  | 0.161066  | 6590 secretory leukocyte peptidase inhibitor                                 |
| GO | serine-type endopeptidase inhibitor a | 9  | 90  | 0.161066  | 6690 serine peptidase inhibitor, Kazal type 1                                |
| GO | serine-type endopeptidase inhibitor a | 9  | 90  | 0.161066  | 6692 serine peptidase inhibitor, Kunitz type 1                               |
| GO | serine-type endopeptidase inhibitor a | 9  | 90  | 0.161066  | 80760 inter-alpha (globulin) inhibitor H5                                    |
| GO | serine-type endopeptidase inhibitor a | 9  | 90  | 0.161066  | 8434 reversion-inducing-cysteine-rich protein with kazal motifs              |
| GO | serine-type endopeptidase inhibitor a | 9  | 90  | 0.161066  | 89778 serpin peptidase inhibitor, clade B (ovalbumin), member 11 (gene/pset  |
| GO | calmodulin binding                    | 13 | 140 | 0.1611272 | 1612 death-associated protein kinase 1                                       |
| GO | calmodulin binding                    | 13 | 140 | 0.1611272 | 23604 death-associated protein kinase 2                                      |
| GO | calmodulin binding                    | 13 | 140 | 0.1611272 | 3782 potassium intermediate/small conductance calcium-activated channel,     |
| GO | calmodulin binding                    | 13 | 140 | 0.1611272 | 3783 potassium intermediate/small conductance calcium-activated channel,     |
| GO | calmodulin binding                    | 13 | 140 | 0.1611272 | 4638 myosin light chain kinase                                               |
| GO | calmodulin binding                    | 13 | 140 | 0.1611272 | 4645 myosin VB                                                               |
| GO | calmodulin binding                    | 13 | 140 | 0.1611272 | 4842 nitric oxide synthase 1 (neuronal)                                      |
| GO | calmodulin binding                    | 13 | 140 | 0.1611272 | 493 ATPase, Ca <sup>++</sup> transporting, plasma membrane 4                 |
| GO | calmodulin binding                    | 13 | 140 | 0.1611272 | 51168 myosin XVA                                                             |
| GO | calmodulin binding                    | 13 | 140 | 0.1611272 | 5136 phosphodiesterase 1A, calmodulin-dependent                              |
| GO | calmodulin binding                    | 13 | 140 | 0.1611272 | 57118 calcium/calmodulin-dependent protein kinase ID                         |
| GO | calmodulin binding                    | 13 | 140 | 0.1611272 | 6004 regulator of G-protein signaling 16                                     |
| GO | calmodulin binding                    | 13 | 140 | 0.1611272 | 6857 synaptotagmin I                                                         |
| GO | cysteine-type endopeptidase activity  | 6  | 54  | 0.1615628 | 1508 cathepsin B                                                             |
| GO | cysteine-type endopeptidase activity  | 6  | 54  | 0.1615628 | 1519 cathepsin O                                                             |
| GO | cysteine-type endopeptidase activity  | 6  | 54  | 0.1615628 | 29108 PYD and CARD domain containing                                         |
| GO | cysteine-type endopeptidase activity  | 6  | 54  | 0.1615628 | 834 caspase 1, apoptosis-related cysteine peptidase (interleukin 1, beta, co |
| GO | cysteine-type endopeptidase activity  | 6  | 54  | 0.1615628 | 837 caspase 4, apoptosis-related cysteine peptidase                          |
| GO | cysteine-type endopeptidase activity  | 6  | 54  | 0.1615628 | 8722 cathepsin F                                                             |

|                              |    |     |           |                                                                       |
|------------------------------|----|-----|-----------|-----------------------------------------------------------------------|
| GO protein localization      | 6  | 54  | 0.1615628 | 1813 dopamine receptor D2                                             |
| GO protein localization      | 6  | 54  | 0.1615628 | 259173 ALS2 C-terminal like                                           |
| GO protein localization      | 6  | 54  | 0.1615628 | 53405 chloride intracellular channel 5                                |
| GO protein localization      | 6  | 54  | 0.1615628 | 55909 bridging integrator 3                                           |
| GO protein localization      | 6  | 54  | 0.1615628 | 604 B-cell CLL/lymphoma 6                                             |
| GO protein localization      | 6  | 54  | 0.1615628 | 81693 amnionless homolog (mouse)                                      |
| GO endocytosis               | 10 | 103 | 0.1657623 | 1785 dynamin 2                                                        |
| GO endocytosis               | 10 | 103 | 0.1657623 | 22925 phospholipase A2 receptor 1, 180kDa                             |
| GO endocytosis               | 10 | 103 | 0.1657623 | 23048 formin binding protein 1                                        |
| GO endocytosis               | 10 | 103 | 0.1657623 | 26119 low density lipoprotein receptor adaptor protein 1              |
| GO endocytosis               | 10 | 103 | 0.1657623 | 286133 scavenger receptor class A, member 5 (putative)                |
| GO endocytosis               | 10 | 103 | 0.1657623 | 3845 v-Ki-ras2 Kirsten rat sarcoma viral oncogene homolog             |
| GO endocytosis               | 10 | 103 | 0.1657623 | 3949 low density lipoprotein receptor                                 |
| GO endocytosis               | 10 | 103 | 0.1657623 | 4038 low density lipoprotein receptor-related protein 4               |
| GO endocytosis               | 10 | 103 | 0.1657623 | 4065 lymphocyte antigen 75                                            |
| GO endocytosis               | 10 | 103 | 0.1657623 | 8527 diacylglycerol kinase, delta 130kDa                              |
| GO inner ear morphogenesis   | 5  | 43  | 0.168023  | 10253 sprouty homolog 2 (Drosophila)                                  |
| GO inner ear morphogenesis   | 5  | 43  | 0.168023  | 2290 forkhead box G1                                                  |
| GO inner ear morphogenesis   | 5  | 43  | 0.168023  | 51168 myosin XVA                                                      |
| GO inner ear morphogenesis   | 5  | 43  | 0.168023  | 5396 paired related homeobox 1                                        |
| GO inner ear morphogenesis   | 5  | 43  | 0.168023  | 9935 v-maf musculoaponeurotic fibrosarcoma oncogene homolog B (avian) |
| GO Notch signaling pathway   | 5  | 43  | 0.168023  | 2296 forkhead box C1                                                  |
| GO Notch signaling pathway   | 5  | 43  | 0.168023  | 2303 forkhead box C2 (MFH-1, mesenchyme forkhead 1)                   |
| GO Notch signaling pathway   | 5  | 43  | 0.168023  | 429 achaete-scute complex homolog 1 (Drosophila)                      |
| GO Notch signaling pathway   | 5  | 43  | 0.168023  | 4851 Notch homolog 1, translocation-associated (Drosophila)           |
| GO Notch signaling pathway   | 5  | 43  | 0.168023  | 4853 Notch homolog 2 (Drosophila)                                     |
| GO glucose metabolic process | 5  | 43  | 0.168023  | 3175 one cut homeobox 1                                               |
| GO glucose metabolic process | 5  | 43  | 0.168023  | 4886 neuropeptide Y receptor Y1                                       |
| GO glucose metabolic process | 5  | 43  | 0.168023  | 5239 phosphoglucomutase 5                                             |
| GO glucose metabolic process | 5  | 43  | 0.168023  | 8660 insulin receptor substrate 2                                     |
| GO glucose metabolic process | 5  | 43  | 0.168023  | 9563 hexose-6-phosphate dehydrogenase (glucose 1-dehydrogenase)       |
| GO angiogenesis              | 11 | 116 | 0.1691608 | 10481 homeobox B13                                                    |
| GO angiogenesis              | 11 | 116 | 0.1691608 | 1295 collagen, type VIII, alpha 1                                     |
| GO angiogenesis              | 11 | 116 | 0.1691608 | 27035 NADPH oxidase 1                                                 |
| GO angiogenesis              | 11 | 116 | 0.1691608 | 3678 integrin, alpha 5 (fibronectin receptor, alpha polypeptide)      |
| GO angiogenesis              | 11 | 116 | 0.1691608 | 3725 jun oncogene                                                     |



|                          |    |     |           |                                                                                 |
|--------------------------|----|-----|-----------|---------------------------------------------------------------------------------|
| GO angiogenesis          | 11 | 116 | 0.1691608 | 3911 laminin, alpha 5                                                           |
| GO angiogenesis          | 11 | 116 | 0.1691608 | 4223 mesenchyme homeobox 2                                                      |
| GO angiogenesis          | 11 | 116 | 0.1691608 | 56913 core 1 synthase, glycoprotein-N-acetylgalactosamine 3-beta-galactosyl     |
| GO angiogenesis          | 11 | 116 | 0.1691608 | 5787 protein tyrosine phosphatase, receptor type, B                             |
| GO angiogenesis          | 11 | 116 | 0.1691608 | 652 bone morphogenetic protein 4                                                |
| GO angiogenesis          | 11 | 116 | 0.1691608 | 94 activin A receptor type II-like 1                                            |
| GO synaptic transmission | 15 | 167 | 0.169308  | 2571 glutamate decarboxylase 1 (brain, 67kDa)                                   |
| GO synaptic transmission | 15 | 167 | 0.169308  | 27345 potassium large conductance calcium-activated channel, subfamily M,       |
| GO synaptic transmission | 15 | 167 | 0.169308  | 2911 glutamate receptor, metabotropic 1                                         |
| GO synaptic transmission | 15 | 167 | 0.169308  | 3355 5-hydroxytryptamine (serotonin) receptor 1F                                |
| GO synaptic transmission | 15 | 167 | 0.169308  | 3786 potassium voltage-gated channel, KQT-like subfamily, member 3              |
| GO synaptic transmission | 15 | 167 | 0.169308  | 4359 myelin protein zero                                                        |
| GO synaptic transmission | 15 | 167 | 0.169308  | 4889 neuropeptide Y receptor Y5                                                 |
| GO synaptic transmission | 15 | 167 | 0.169308  | 5367 pro-melanin-concentrating hormone                                          |
| GO synaptic transmission | 15 | 167 | 0.169308  | 6505 solute carrier family 1 (neuronal/epithelial high affinity glutamate trans |
| GO synaptic transmission | 15 | 167 | 0.169308  | 6750 somatostatin                                                               |
| GO synaptic transmission | 15 | 167 | 0.169308  | 6857 synaptotagmin I                                                            |
| GO synaptic transmission | 15 | 167 | 0.169308  | 774 calcium channel, voltage-dependent, N type, alpha 1B subunit                |
| GO synaptic transmission | 15 | 167 | 0.169308  | 783 calcium channel, voltage-dependent, beta 2 subunit                          |
| GO synaptic transmission | 15 | 167 | 0.169308  | 8973 cholinergic receptor, nicotinic, alpha 6                                   |
| GO synaptic transmission | 15 | 167 | 0.169308  | 9892 synaptosomal-associated protein, 91kDa homolog (mouse)                     |
| GO microsome             | 19 | 219 | 0.1693996 | 10170 dehydrogenase/reductase (SDR family) member 9                             |
| GO microsome             | 19 | 219 | 0.1693996 | 154 adrenergic, beta-2-, receptor, surface                                      |
| GO microsome             | 19 | 219 | 0.1693996 | 1558 cytochrome P450, family 2, subfamily C, polypeptide 8                      |
| GO microsome             | 19 | 219 | 0.1693996 | 1559 cytochrome P450, family 2, subfamily C, polypeptide 9                      |
| GO microsome             | 19 | 219 | 0.1693996 | 1571 cytochrome P450, family 2, subfamily E, polypeptide 1                      |
| GO microsome             | 19 | 219 | 0.1693996 | 157506 retinol dehydrogenase 10 (all-trans)                                     |
| GO microsome             | 19 | 219 | 0.1693996 | 1577 cytochrome P450, family 3, subfamily A, polypeptide 5                      |
| GO microsome             | 19 | 219 | 0.1693996 | 2182 acyl-CoA synthetase long-chain family member 4                             |
| GO microsome             | 19 | 219 | 0.1693996 | 2911 glutamate receptor, metabotropic 1                                         |
| GO microsome             | 19 | 219 | 0.1693996 | 3643 insulin receptor                                                           |
| GO microsome             | 19 | 219 | 0.1693996 | 3709 inositol 1,4,5-triphosphate receptor, type 2                               |
| GO microsome             | 19 | 219 | 0.1693996 | 4056 leukotriene C4 synthase                                                    |
| GO microsome             | 19 | 219 | 0.1693996 | 412 steroid sulfatase (microsomal), isozyme S                                   |
| GO microsome             | 19 | 219 | 0.1693996 | 4939 2'-5'-oligoadenylate synthetase 2, 69/71kDa                                |
| GO microsome             | 19 | 219 | 0.1693996 | 55080 TAP binding protein-like                                                  |

|    |                                         |    |     |           |                                                                               |
|----|-----------------------------------------|----|-----|-----------|-------------------------------------------------------------------------------|
| GO | microsome                               | 19 | 219 | 0.1693996 | 5742 prostaglandin-endoperoxide synthase 1 (prostaglandin G/H synthase a      |
| GO | microsome                               | 19 | 219 | 0.1693996 | 79152 fatty acid 2-hydroxylase                                                |
| GO | microsome                               | 19 | 219 | 0.1693996 | 952 CD38 molecule                                                             |
| GO | microsome                               | 19 | 219 | 0.1693996 | 9563 hexose-6-phosphate dehydrogenase (glucose 1-dehydrogenase)               |
| GO | protein kinase inhibitor activity       | 3  | 21  | 0.1698873 | 10221 tribbles homolog 1 (Drosophila)                                         |
| GO | protein kinase inhibitor activity       | 3  | 21  | 0.1698873 | 28951 tribbles homolog 2 (Drosophila)                                         |
| GO | protein kinase inhibitor activity       | 3  | 21  | 0.1698873 | 9021 suppressor of cytokine signaling 3                                       |
| GO | calcium-dependent phospholipid bin      | 3  | 21  | 0.1698873 | 11199 annexin A10                                                             |
| GO | calcium-dependent phospholipid bin      | 3  | 21  | 0.1698873 | 23208 synaptotagmin XI                                                        |
| GO | calcium-dependent phospholipid bin      | 3  | 21  | 0.1698873 | 311 annexin A11                                                               |
| GO | Wnt receptor signaling pathway, calc    | 3  | 21  | 0.1698873 | 54361 wingless-type MMTV integration site family, member 4                    |
| GO | Wnt receptor signaling pathway, calc    | 3  | 21  | 0.1698873 | 7474 wingless-type MMTV integration site family, member 5A                    |
| GO | Wnt receptor signaling pathway, calc    | 3  | 21  | 0.1698873 | 7477 wingless-type MMTV integration site family, member 7B                    |
| GO | threonine-type endopeptidase activit    | 3  | 21  | 0.1698873 | 5696 proteasome (prosome, macropain) subunit, beta type, 8 (large multifur    |
| GO | threonine-type endopeptidase activit    | 3  | 21  | 0.1698873 | 5698 proteasome (prosome, macropain) subunit, beta type, 9 (large multifur    |
| GO | threonine-type endopeptidase activit    | 3  | 21  | 0.1698873 | 5699 proteasome (prosome, macropain) subunit, beta type, 10                   |
| GO | polysaccharide binding                  | 2  | 11  | 0.1706035 | 10216 proteoglycan 4                                                          |
| GO | polysaccharide binding                  | 2  | 11  | 0.1706035 | 157869 chromosome 8 open reading frame 84                                     |
| GO | morphogenesis of an epithelium          | 2  | 11  | 0.1706035 | 10481 homeobox B13                                                            |
| GO | morphogenesis of an epithelium          | 2  | 11  | 0.1706035 | 760 carbonic anhydrase II                                                     |
| GO | ceramide biosynthetic process           | 2  | 11  | 0.1706035 | 123099 degenerative spermatocyte homolog 2, lipid desaturase (Drosophila)     |
| GO | ceramide biosynthetic process           | 2  | 11  | 0.1706035 | 2055 ceroid-lipofuscinosis, neuronal 8 (epilepsy, progressive with mental ret |
| GO | retinol binding                         | 2  | 11  | 0.1706035 | 1382 cellular retinoic acid binding protein 2                                 |
| GO | retinol binding                         | 2  | 11  | 0.1706035 | 5950 retinol binding protein 4, plasma                                        |
| GO | DNA methylation involved in gamete      | 2  | 11  | 0.1706035 | 143689 piwi-like 4 (Drosophila)                                               |
| GO | DNA methylation involved in gamete      | 2  | 11  | 0.1706035 | 55124 piwi-like 2 (Drosophila)                                                |
| GO | cell recognition                        | 2  | 11  | 0.1706035 | 1462 versican                                                                 |
| GO | cell recognition                        | 2  | 11  | 0.1706035 | 3911 laminin, alpha 5                                                         |
| GO | guanylate kinase activity               | 2  | 11  | 0.1706035 | 1741 discs, large homolog 3 (Drosophila)                                      |
| GO | guanylate kinase activity               | 2  | 11  | 0.1706035 | 9414 tight junction protein 2 (zona occludens 2)                              |
| GO | T cell costimulation                    | 2  | 11  | 0.1706035 | 1803 dipeptidyl-peptidase 4                                                   |
| GO | T cell costimulation                    | 2  | 11  | 0.1706035 | 8740 tumor necrosis factor (ligand) superfamily, member 14                    |
| GO | long-chain fatty acid-CoA ligase activi | 2  | 11  | 0.1706035 | 2182 acyl-CoA synthetase long-chain family member 4                           |
| GO | long-chain fatty acid-CoA ligase activi | 2  | 11  | 0.1706035 | 51703 acyl-CoA synthetase long-chain family member 5                          |
| GO | regulation of blood vessel size         | 2  | 11  | 0.1706035 | 2296 forkhead box C1                                                          |
| GO | regulation of blood vessel size         | 2  | 11  | 0.1706035 | 2303 forkhead box C2 (MFH-1, mesenchyme forkhead 1)                           |

|    |                                                    |   |    |           |                                                                                     |
|----|----------------------------------------------------|---|----|-----------|-------------------------------------------------------------------------------------|
| GO | kinesin binding                                    | 2 | 11 | 0.1706035 | 23095 kinesin family member 1B                                                      |
| GO | kinesin binding                                    | 2 | 11 | 0.1706035 | 6622 synuclein, alpha (non A4 component of amyloid precursor)                       |
| GO | Rho GTPase binding                                 | 2 | 11 | 0.1706035 | 23348 dedicator of cytokinesis 9                                                    |
| GO | Rho GTPase binding                                 | 2 | 11 | 0.1706035 | 23500 dishevelled associated activator of morphogenesis 2                           |
| GO | positive regulation of DNA binding                 | 2 | 11 | 0.1706035 | 23476 bromodomain containing 4                                                      |
| GO | positive regulation of DNA binding                 | 2 | 11 | 0.1706035 | 28996 homeodomain interacting protein kinase 2                                      |
| GO | low-density lipoprotein receptor binding           | 2 | 11 | 0.1706035 | 255738 proprotein convertase subtilisin/kexin type 9                                |
| GO | low-density lipoprotein receptor binding           | 2 | 11 | 0.1706035 | 6857 synaptotagmin I                                                                |
| GO | protein maturation by peptide bond formation       | 2 | 11 | 0.1706035 | 255738 proprotein convertase subtilisin/kexin type 9                                |
| GO | protein maturation by peptide bond formation       | 2 | 11 | 0.1706035 | 5046 proprotein convertase subtilisin/kexin type 6                                  |
| GO | gap junction channel activity                      | 2 | 11 | 0.1706035 | 2706 gap junction protein, beta 2, 26kDa                                            |
| GO | gap junction channel activity                      | 2 | 11 | 0.1706035 | 2707 gap junction protein, beta 3, 31kDa                                            |
| GO | laminin binding                                    | 2 | 11 | 0.1706035 | 27076 LY6/PLAUR domain containing 3                                                 |
| GO | laminin binding                                    | 2 | 11 | 0.1706035 | 375790 agrin                                                                        |
| GO | regulation of neurotransmitter secretion           | 2 | 11 | 0.1706035 | 27345 potassium large conductance calcium-activated channel, subfamily M,           |
| GO | regulation of neurotransmitter secretion           | 2 | 11 | 0.1706035 | 5071 Parkinson disease (autosomal recessive, juvenile) 2, parkin                    |
| GO | cell volume homeostasis                            | 2 | 11 | 0.1706035 | 358 aquaporin 1 (Colton blood group)                                                |
| GO | cell volume homeostasis                            | 2 | 11 | 0.1706035 | 3783 potassium intermediate/small conductance calcium-activated channel,            |
| GO | hemidesmosome assembly                             | 2 | 11 | 0.1706035 | 3691 integrin, beta 4                                                               |
| GO | hemidesmosome assembly                             | 2 | 11 | 0.1706035 | 3914 laminin, beta 3                                                                |
| GO | negative regulation of DNA binding                 | 2 | 11 | 0.1706035 | 3725 jun oncogene                                                                   |
| GO | negative regulation of DNA binding                 | 2 | 11 | 0.1706035 | 4792 nuclear factor of kappa light polypeptide gene enhancer in B-cells inhibitor 3 |
| GO | somatic stem cell maintenance                      | 2 | 11 | 0.1706035 | 3815 v-kit Hardy-Zuckerman 4 feline sarcoma viral oncogene homolog                  |
| GO | somatic stem cell maintenance                      | 2 | 11 | 0.1706035 | 5460 POU class 5 homeobox 1                                                         |
| GO | vasodilation                                       | 2 | 11 | 0.1706035 | 3827 kininogen 1                                                                    |
| GO | vasodilation                                       | 2 | 11 | 0.1706035 | 5025 purinergic receptor P2X, ligand-gated ion channel, 4                           |
| GO | 3',5'-cyclic-nucleotide phosphodiesterase activity | 2 | 11 | 0.1706035 | 5152 phosphodiesterase 9A                                                           |
| GO | 3',5'-cyclic-nucleotide phosphodiesterase activity | 2 | 11 | 0.1706035 | 8622 phosphodiesterase 8B                                                           |
| GO | face morphogenesis                                 | 2 | 11 | 0.1706035 | 64651 cysteine-serine-rich nuclear protein 1                                        |
| GO | face morphogenesis                                 | 2 | 11 | 0.1706035 | 84159 AT rich interactive domain 5B (MRF1-like)                                     |
| GO | phosphatidylserine binding                         | 2 | 11 | 0.1706035 | 85477 scinderin                                                                     |
| GO | phosphatidylserine binding                         | 2 | 11 | 0.1706035 | 91404 SEC14 and spectrin domains 1                                                  |
| GO | activin binding                                    | 2 | 11 | 0.1706035 | 91 activin A receptor, type IB                                                      |
| GO | activin binding                                    | 2 | 11 | 0.1706035 | 94 activin A receptor type II-like 1                                                |
| GO | protein amino acid autophosphorylation             | 8 | 79 | 0.1709253 | 11213 interleukin-1 receptor-associated kinase 3                                    |
| GO | protein amino acid autophosphorylation             | 8 | 79 | 0.1709253 | 127933 U2AF homology motif (UHM) kinase 1                                           |

|    |                                      |    |     |           |                                                                                 |
|----|--------------------------------------|----|-----|-----------|---------------------------------------------------------------------------------|
| GO | protein amino acid autophosphorylat  | 8  | 79  | 0.1709253 | 23043 TRAF2 and NCK interacting kinase                                          |
| GO | protein amino acid autophosphorylat  | 8  | 79  | 0.1709253 | 3643 insulin receptor                                                           |
| GO | protein amino acid autophosphorylat  | 8  | 79  | 0.1709253 | 3815 v-kit Hardy-Zuckerman 4 feline sarcoma viral oncogene homolog              |
| GO | protein amino acid autophosphorylat  | 8  | 79  | 0.1709253 | 4293 mitogen-activated protein kinase kinase kinase 9                           |
| GO | protein amino acid autophosphorylat  | 8  | 79  | 0.1709253 | 6850 spleen tyrosine kinase                                                     |
| GO | protein amino acid autophosphorylat  | 8  | 79  | 0.1709253 | 91 activin A receptor, type IB                                                  |
| GO | ossification                         | 6  | 55  | 0.1716065 | 1009 cadherin 11, type 2, OB-cadherin (osteoblast)                              |
| GO | ossification                         | 6  | 55  | 0.1716065 | 2296 forkhead box C1                                                            |
| GO | ossification                         | 6  | 55  | 0.1716065 | 2303 forkhead box C2 (MFH-1, mesenchyme forkhead 1)                             |
| GO | ossification                         | 6  | 55  | 0.1716065 | 50617 ATPase, H+ transporting, lysosomal V0 subunit a4                          |
| GO | ossification                         | 6  | 55  | 0.1716065 | 8600 tumor necrosis factor (ligand) superfamily, member 11                      |
| GO | ossification                         | 6  | 55  | 0.1716065 | 91461 protein kinase domain containing, cytoplasmic homolog (mouse)             |
| GO | neural tube closure                  | 4  | 32  | 0.1721517 | 57619 shroom family member 3                                                    |
| GO | neural tube closure                  | 4  | 32  | 0.1721517 | 7546 Zic family member 2 (odd-paired homolog, Drosophila)                       |
| GO | neural tube closure                  | 4  | 32  | 0.1721517 | 85416 Zic family member 5 (odd-paired homolog, Drosophila)                      |
| GO | neural tube closure                  | 4  | 32  | 0.1721517 | 8543 LIM domain only 4                                                          |
| GO | regulation of transcription from RNA | 18 | 207 | 0.1748127 | 1628 D site of albumin promoter (albumin D-box) binding protein                 |
| GO | regulation of transcription from RNA | 18 | 207 | 0.1748127 | 22906 trafficking protein, kinesin binding 1                                    |
| GO | regulation of transcription from RNA | 18 | 207 | 0.1748127 | 2353 FBJ murine osteosarcoma viral oncogene homolog                             |
| GO | regulation of transcription from RNA | 18 | 207 | 0.1748127 | 3175 one cut homeobox 1                                                         |
| GO | regulation of transcription from RNA | 18 | 207 | 0.1748127 | 3400 inhibitor of DNA binding 4, dominant negative helix-loop-helix protein     |
| GO | regulation of transcription from RNA | 18 | 207 | 0.1748127 | 3726 jun B proto-oncogene                                                       |
| GO | regulation of transcription from RNA | 18 | 207 | 0.1748127 | 4613 v-myc myelocytomatosis viral related oncogene, neuroblastoma derive        |
| GO | regulation of transcription from RNA | 18 | 207 | 0.1748127 | 4778 nuclear factor (erythroid-derived 2), 45kDa                                |
| GO | regulation of transcription from RNA | 18 | 207 | 0.1748127 | 4802 nuclear transcription factor Y, gamma                                      |
| GO | regulation of transcription from RNA | 18 | 207 | 0.1748127 | 55140 elongation protein 3 homolog ( <i>S. cerevisiae</i> )                     |
| GO | regulation of transcription from RNA | 18 | 207 | 0.1748127 | 6604 SWI/SNF related, matrix associated, actin dependent regulator of chromatin |
| GO | regulation of transcription from RNA | 18 | 207 | 0.1748127 | 6778 signal transducer and activator of transcription 6, interleukin-4 induced  |
| GO | regulation of transcription from RNA | 18 | 207 | 0.1748127 | 687 Kruppel-like factor 9                                                       |
| GO | regulation of transcription from RNA | 18 | 207 | 0.1748127 | 6921 transcription elongation factor B (SIII), polypeptide 1 (15kDa, elongin C) |
| GO | regulation of transcription from RNA | 18 | 207 | 0.1748127 | 6941 transcription factor 19                                                    |
| GO | regulation of transcription from RNA | 18 | 207 | 0.1748127 | 7008 thyrotrophic embryonic factor                                              |
| GO | regulation of transcription from RNA | 18 | 207 | 0.1748127 | 7022 transcription factor AP-2 gamma (activating enhancer binding protein 2)    |
| GO | regulation of transcription from RNA | 18 | 207 | 0.1748127 | 7026 nuclear receptor subfamily 2, group F, member 2                            |
| GO | response to hormone stimulus         | 5  | 44  | 0.1796636 | 2303 forkhead box C2 (MFH-1, mesenchyme forkhead 1)                             |
| GO | response to hormone stimulus         | 5  | 44  | 0.1796636 | 4151 myoglobin                                                                  |

|                                 |    |     |           |                                                                    |
|---------------------------------|----|-----|-----------|--------------------------------------------------------------------|
| GO response to hormone stimulus | 5  | 44  | 0.1796636 | 6096 RAR-related orphan receptor B                                 |
| GO response to hormone stimulus | 5  | 44  | 0.1796636 | 85004 RAS-like, estrogen-regulated, growth inhibitor               |
| GO response to hormone stimulus | 5  | 44  | 0.1796636 | 952 CD38 molecule                                                  |
| GO cell-cell junction           | 6  | 56  | 0.1819008 | 10076 protein tyrosine phosphatase, receptor type, U               |
| GO cell-cell junction           | 6  | 56  | 0.1819008 | 11187 plakophilin 3                                                |
| GO cell-cell junction           | 6  | 56  | 0.1819008 | 3678 integrin, alpha 5 (fibronectin receptor, alpha polypeptide)   |
| GO cell-cell junction           | 6  | 56  | 0.1819008 | 5318 plakophilin 2                                                 |
| GO cell-cell junction           | 6  | 56  | 0.1819008 | 56288 par-3 partitioning defective 3 homolog (C. elegans)          |
| GO cell-cell junction           | 6  | 56  | 0.1819008 | 57863 cell adhesion molecule 3                                     |
| GO lysosome                     | 13 | 144 | 0.1858123 | 10268 receptor (G protein-coupled) activity modifying protein 3    |
| GO lysosome                     | 13 | 144 | 0.1858123 | 1508 cathepsin B                                                   |
| GO lysosome                     | 13 | 144 | 0.1858123 | 1519 cathepsin O                                                   |
| GO lysosome                     | 13 | 144 | 0.1858123 | 154 adrenergic, beta-2-, receptor, surface                         |
| GO lysosome                     | 13 | 144 | 0.1858123 | 22901 arylsulfatase G                                              |
| GO lysosome                     | 13 | 144 | 0.1858123 | 23048 formin binding protein 1                                     |
| GO lysosome                     | 13 | 144 | 0.1858123 | 2517 fucosidase, alpha-L- 1, tissue                                |
| GO lysosome                     | 13 | 144 | 0.1858123 | 255738 proprotein convertase subtilisin/kexin type 9               |
| GO lysosome                     | 13 | 144 | 0.1858123 | 2990 glucuronidase, beta                                           |
| GO lysosome                     | 13 | 144 | 0.1858123 | 3373 hyaluronoglucosaminidase 1                                    |
| GO lysosome                     | 13 | 144 | 0.1858123 | 412 steroid sulfatase (microsomal), isozyme S                      |
| GO lysosome                     | 13 | 144 | 0.1858123 | 5873 RAB27A, member RAS oncogene family                            |
| GO lysosome                     | 13 | 144 | 0.1858123 | 8722 cathepsin F                                                   |
| GO JNK cascade                  | 4  | 33  | 0.1860463 | 10221 tribbles homolog 1 (Drosophila)                              |
| GO JNK cascade                  | 4  | 33  | 0.1860463 | 148170 CDC42 effector protein (Rho GTPase binding) 5               |
| GO JNK cascade                  | 4  | 33  | 0.1860463 | 7474 wingless-type MMTV integration site family, member 5A         |
| GO JNK cascade                  | 4  | 33  | 0.1860463 | 9459 Rac/Cdc42 guanine nucleotide exchange factor (GEF) 6          |
| GO acrosomal vesicle            | 4  | 33  | 0.1860463 | 148229 ATPase, class I, type 8B, member 3                          |
| GO acrosomal vesicle            | 4  | 33  | 0.1860463 | 3815 v-kit Hardy-Zuckerman 4 feline sarcoma viral oncogene homolog |
| GO acrosomal vesicle            | 4  | 33  | 0.1860463 | 4851 Notch homolog 1, translocation-associated (Drosophila)        |
| GO acrosomal vesicle            | 4  | 33  | 0.1860463 | 799 calcitonin receptor                                            |
| GO T cell activation            | 4  | 33  | 0.1860463 | 1803 dipeptidyl-peptidase 4                                        |
| GO T cell activation            | 4  | 33  | 0.1860463 | 23303 kinesin family member 13B                                    |
| GO T cell activation            | 4  | 33  | 0.1860463 | 84941 hematopoietic SH2 domain containing                          |
| GO T cell activation            | 4  | 33  | 0.1860463 | 8740 tumor necrosis factor (ligand) superfamily, member 14         |
| GO potassium channel activity   | 4  | 33  | 0.1860463 | 358 aquaporin 1 (Colton blood group)                               |
| GO potassium channel activity   | 4  | 33  | 0.1860463 | 3775 potassium channel, subfamily K, member 1                      |

|                                           |   |    |           |                                                                    |
|-------------------------------------------|---|----|-----------|--------------------------------------------------------------------|
| GO potassium channel activity             | 4 | 33 | 0.1860463 | 3786 potassium voltage-gated channel, KQT-like subfamily, member 3 |
| GO potassium channel activity             | 4 | 33 | 0.1860463 | 8645 potassium channel, subfamily K, member 5                      |
| GO determination of left/right symmetry   | 4 | 33 | 0.1860463 | 4851 Notch homolog 1, translocation-associated (Drosophila)        |
| GO determination of left/right symmetry   | 4 | 33 | 0.1860463 | 4853 Notch homolog 2 (Drosophila)                                  |
| GO determination of left/right symmetry   | 4 | 33 | 0.1860463 | 5308 paired-like homeodomain 2                                     |
| GO determination of left/right symmetry   | 4 | 33 | 0.1860463 | 84976 dispatched homolog 1 (Drosophila)                            |
| GO positive regulation of translation     | 3 | 22 | 0.1873576 | 2033 E1A binding protein p300                                      |
| GO positive regulation of translation     | 3 | 22 | 0.1873576 | 3569 interleukin 6 (interferon, beta 2)                            |
| GO positive regulation of translation     | 3 | 22 | 0.1873576 | 55124 piwi-like 2 (Drosophila)                                     |
| GO multicellular organism growth          | 3 | 22 | 0.1873576 | 28982 feline leukemia virus subgroup C cellular receptor 1         |
| GO multicellular organism growth          | 3 | 22 | 0.1873576 | 29123 ankyrin repeat domain 11                                     |
| GO multicellular organism growth          | 3 | 22 | 0.1873576 | 84159 AT rich interactive domain 5B (MRF1-like)                    |
| GO positive regulation of neuron differer | 3 | 22 | 0.1873576 | 3169 forkhead box A1                                               |
| GO positive regulation of neuron differer | 3 | 22 | 0.1873576 | 429 achaete-scute complex homolog 1 (Drosophila)                   |
| GO positive regulation of neuron differer | 3 | 22 | 0.1873576 | 627 brain-derived neurotrophic factor                              |
| GO mesoderm formation                     | 3 | 22 | 0.1873576 | 4087 SMAD family member 2                                          |
| GO mesoderm formation                     | 3 | 22 | 0.1873576 | 8013 nuclear receptor subfamily 4, group A, member 3               |
| GO mesoderm formation                     | 3 | 22 | 0.1873576 | 8646 chordin                                                       |
| GO regulation of ubiquitin-protein ligase | 1 | 3  | 0.1913587 | 10116 fem-1 homolog b (C. elegans)                                 |
| GO progesterone metabolic process         | 1 | 3  | 0.1913587 | 10170 dehydrogenase/reductase (SDR family) member 9                |
| GO double-stranded RNA adenosine dea      | 1 | 3  | 0.1913587 | 104 adenosine deaminase, RNA-specific, B1 (RED1 homolog rat)       |
| GO polo kinase kinase activity            | 1 | 3  | 0.1913587 | 10769 polo-like kinase 2 (Drosophila)                              |
| GO negative regulation of myelination     | 1 | 3  | 0.1913587 | 11202 kallikrein-related peptidase 8                               |
| GO heme transporter activity              | 1 | 3  | 0.1913587 | 113235 solute carrier family 46 (folate transporter), member 1     |
| GO cellular chloride ion homeostasis      | 1 | 3  | 0.1913587 | 1152 creatine kinase, brain                                        |
| GO creatine kinase activity               | 1 | 3  | 0.1913587 | 1152 creatine kinase, brain                                        |
| GO regulation of protein export from nuc  | 1 | 3  | 0.1913587 | 127933 U2AF homology motif (UHM) kinase 1                          |
| GO sphingosine metabolic process          | 1 | 3  | 0.1913587 | 130367 sphingosine-1-phosphate phosphotase 2                       |
| GO kininogen binding                      | 1 | 3  | 0.1913587 | 1508 cathepsin B                                                   |
| GO response to interleukin-4              | 1 | 3  | 0.1913587 | 1508 cathepsin B                                                   |
| GO adenylate cyclase binding              | 1 | 3  | 0.1913587 | 154 adrenergic, beta-2-, receptor, surface                         |
| GO desensitization of G-protein coupled   | 1 | 3  | 0.1913587 | 154 adrenergic, beta-2-, receptor, surface                         |
| GO diet induced thermogenesis             | 1 | 3  | 0.1913587 | 154 adrenergic, beta-2-, receptor, surface                         |
| GO norepinephrine binding                 | 1 | 3  | 0.1913587 | 154 adrenergic, beta-2-, receptor, surface                         |
| GO organic acid metabolic process         | 1 | 3  | 0.1913587 | 1558 cytochrome P450, family 2, subfamily C, polypeptide 8         |
| GO oxidoreductase activity, acting on pai | 1 | 3  | 0.1913587 | 1571 cytochrome P450, family 2, subfamily E, polypeptide 1         |

|    |                                        |   |   |           |                                                                               |
|----|----------------------------------------|---|---|-----------|-------------------------------------------------------------------------------|
| GO | Gram-negative bacterial cell surface l | 1 | 3 | 0.1913587 | 1755 deleted in malignant brain tumors 1                                      |
| GO | regulation of cell-cell adhesion media | 1 | 3 | 0.1913587 | 1803 dipeptidyl-peptidase 4                                                   |
| GO | branching morphogenesis of a nerve     | 1 | 3 | 0.1913587 | 1813 dopamine receptor D2                                                     |
| GO | ovarian follicle rupture               | 1 | 3 | 0.1913587 | 183 angiotensinogen (serpin peptidase inhibitor, clade A, member 8)           |
| GO | regulation of natriuresis              | 1 | 3 | 0.1913587 | 183 angiotensinogen (serpin peptidase inhibitor, clade A, member 8)           |
| GO | regulation of norepinephrine secretio  | 1 | 3 | 0.1913587 | 183 angiotensinogen (serpin peptidase inhibitor, clade A, member 8)           |
| GO | endothelin B receptor binding          | 1 | 3 | 0.1913587 | 1906 endothelin 1                                                             |
| GO | rhombomere 3 development               | 1 | 3 | 0.1913587 | 1959 early growth response 2                                                  |
| GO | regulation of blood vessel endothelia  | 1 | 3 | 0.1913587 | 1969 EPH receptor A2                                                          |
| GO | N-terminal peptidyl-lysine acetylatio  | 1 | 3 | 0.1913587 | 2033 E1A binding protein p300                                                 |
| GO | positive regulation of protein import  | 1 | 3 | 0.1913587 | 2033 E1A binding protein p300                                                 |
| GO | age-dependent response to oxidative    | 1 | 3 | 0.1913587 | 2055 ceroid-lipofuscinosis, neuronal 8 (epilepsy, progressive with mental ret |
| GO | macrophage activation during immur     | 1 | 3 | 0.1913587 | 22904 strawberry notch homolog 2 (Drosophila)                                 |
| GO | transforming growth factor beta rece   | 1 | 3 | 0.1913587 | 2331 fibromodulin                                                             |
| GO | adenosylhomocysteinase activity        | 1 | 3 | 0.1913587 | 23382 adenosylhomocysteinase-like 2                                           |
| GO | conditioned taste aversion             | 1 | 3 | 0.1913587 | 2353 FBJ murine osteosarcoma viral oncogene homolog                           |
| GO | 3-galactosyl-N-acetylglucosaminide 4   | 1 | 3 | 0.1913587 | 2525 fucosyltransferase 3 (galactoside 3(4)-L-fucosyltransferase, Lewis blood |
| GO | apolipoprotein receptor binding        | 1 | 3 | 0.1913587 | 255738 proprotein convertase subtilisin/kexin type 9                          |
| GO | positive regulation of receptor intern | 1 | 3 | 0.1913587 | 255738 proprotein convertase subtilisin/kexin type 9                          |
| GO | very-low-density lipoprotein receptor  | 1 | 3 | 0.1913587 | 255738 proprotein convertase subtilisin/kexin type 9                          |
| GO | phosphatidylserine metabolic proces    | 1 | 3 | 0.1913587 | 256987 serine incorporator 5                                                  |
| GO | protein amino acid O-linked glycosyla  | 1 | 3 | 0.1913587 | 2589 UDP-N-acetyl-alpha-D-galactosamine:polypeptide N-acetylgalactosami       |
| GO | protein amino acid O-linked glycosyla  | 1 | 3 | 0.1913587 | 2589 UDP-N-acetyl-alpha-D-galactosamine:polypeptide N-acetylgalactosami       |
| GO | heparin biosynthetic process           | 1 | 3 | 0.1913587 | 26035 glucuronic acid epimerase                                               |
| GO | cerebral cortex tangential migration   | 1 | 3 | 0.1913587 | 26468 LIM homeobox 6                                                          |
| GO | AMP deaminase activity                 | 1 | 3 | 0.1913587 | 271 adenosine monophosphate deaminase 2                                       |
| GO | forebrain dorsal/ventral pattern form  | 1 | 3 | 0.1913587 | 2737 GLI family zinc finger 3                                                 |
| GO | smoothened signaling pathway invol     | 1 | 3 | 0.1913587 | 2737 GLI family zinc finger 3                                                 |
| GO | tube development                       | 1 | 3 | 0.1913587 | 2737 GLI family zinc finger 3                                                 |
| GO | activation of phospholipase C activity | 1 | 3 | 0.1913587 | 2769 guanine nucleotide binding protein (G protein), alpha 15 (Gq class)      |
| GO | bone development                       | 1 | 3 | 0.1913587 | 29123 ankyrin repeat domain 11                                                |
| GO | beta-glucuronidase activity            | 1 | 3 | 0.1913587 | 2990 glucuronidase, beta                                                      |
| GO | cilium axoneme assembly                | 1 | 3 | 0.1913587 | 345895 radial spoke head 4 homolog A (Chlamydomonas)                          |
| GO | myoblast proliferation                 | 1 | 3 | 0.1913587 | 3479 insulin-like growth factor 1 (somatomedin C)                             |
| GO | negative regulation of androgen rece   | 1 | 3 | 0.1913587 | 3479 insulin-like growth factor 1 (somatomedin C)                             |
| GO | negative regulation of smooth muscl    | 1 | 3 | 0.1913587 | 3479 insulin-like growth factor 1 (somatomedin C)                             |

|                                             |   |   |           |                                                                          |
|---------------------------------------------|---|---|-----------|--------------------------------------------------------------------------|
| GO Type II pneumocyte differentiation       | 1 | 3 | 0.1913587 | 3479 insulin-like growth factor 1 (somatomedin C)                        |
| GO skeletal muscle tissue growth            | 1 | 3 | 0.1913587 | 3488 insulin-like growth factor binding protein 5                        |
| GO interleukin-2 receptor activity          | 1 | 3 | 0.1913587 | 3561 interleukin 2 receptor, gamma (severe combined immunodeficiency)    |
| GO negative regulation of chemokine bic     | 1 | 3 | 0.1913587 | 3569 interleukin 6 (interferon, beta 2)                                  |
| GO cellular response to cAMP                | 1 | 3 | 0.1913587 | 358 aquaporin 1 (Colton blood group)                                     |
| GO cellular response to retinoic acid       | 1 | 3 | 0.1913587 | 358 aquaporin 1 (Colton blood group)                                     |
| GO cellular response to stress              | 1 | 3 | 0.1913587 | 358 aquaporin 1 (Colton blood group)                                     |
| GO glycerol transport                       | 1 | 3 | 0.1913587 | 358 aquaporin 1 (Colton blood group)                                     |
| GO multicellular organismal water home      | 1 | 3 | 0.1913587 | 358 aquaporin 1 (Colton blood group)                                     |
| GO potassium ion transmembrane transp       | 1 | 3 | 0.1913587 | 358 aquaporin 1 (Colton blood group)                                     |
| GO insulin receptor complex                 | 1 | 3 | 0.1913587 | 3643 insulin receptor                                                    |
| GO PTB domain binding                       | 1 | 3 | 0.1913587 | 3643 insulin receptor                                                    |
| GO CD8-positive, alpha-beta T cell differ   | 1 | 3 | 0.1913587 | 3659 interferon regulatory factor 1                                      |
| GO alphav-beta3 integrin-vitronectin con    | 1 | 3 | 0.1913587 | 3678 integrin, alpha 5 (fibronectin receptor, alpha polypeptide)         |
| GO vascular endothelial growth factor re    | 1 | 3 | 0.1913587 | 3678 integrin, alpha 5 (fibronectin receptor, alpha polypeptide)         |
| GO inositol 1,4,5-trisphosphate-sensitive   | 1 | 3 | 0.1913587 | 3709 inositol 1,4,5-triphosphate receptor, type 2                        |
| GO inositol-1,4,5-trisphosphate receptor    | 1 | 3 | 0.1913587 | 3709 inositol 1,4,5-triphosphate receptor, type 2                        |
| GO osteoblast proliferation                 | 1 | 3 | 0.1913587 | 3726 jun B proto-oncogene                                                |
| GO positive regulation of transcription fr  | 1 | 3 | 0.1913587 | 3726 jun B proto-oncogene                                                |
| GO clustering of voltage-gated sodium ch    | 1 | 3 | 0.1913587 | 375790 agrin                                                             |
| GO neurotransmitter receptor metabolic      | 1 | 3 | 0.1913587 | 375790 agrin                                                             |
| GO small conductance calcium-activated      | 1 | 3 | 0.1913587 | 3782 potassium intermediate/small conductance calcium-activated channel, |
| GO myeloid progenitor cell differentiat     | 1 | 3 | 0.1913587 | 3815 v-kit Hardy-Zuckerman 4 feline sarcoma viral oncogene homolog       |
| GO positive regulation of long-term neur    | 1 | 3 | 0.1913587 | 3815 v-kit Hardy-Zuckerman 4 feline sarcoma viral oncogene homolog       |
| GO laminin-10 complex                       | 1 | 3 | 0.1913587 | 3911 laminin, alpha 5                                                    |
| GO negative regulation of stress fiber ass  | 1 | 3 | 0.1913587 | 395 Rho GTPase activating protein 6                                      |
| GO IgE binding                              | 1 | 3 | 0.1913587 | 3958 lectin, galactoside-binding, soluble, 3                             |
| GO actinin binding                          | 1 | 3 | 0.1913587 | 4008 LIM domain 7                                                        |
| GO elastic fiber assembly                   | 1 | 3 | 0.1913587 | 4015 lysyl oxidase                                                       |
| GO activin responsive factor complex        | 1 | 3 | 0.1913587 | 4087 SMAD family member 2                                                |
| GO zygotic specification of dorsal/ventra   | 1 | 3 | 0.1913587 | 4087 SMAD family member 2                                                |
| GO negative regulation of epithelial cell r | 1 | 3 | 0.1913587 | 4163 mutated in colorectal cancers                                       |
| GO somite specification                     | 1 | 3 | 0.1913587 | 4223 mesenchyme homeobox 2                                               |
| GO positive regulation of melanocyte dif    | 1 | 3 | 0.1913587 | 4254 KIT ligand                                                          |
| GO stem cell factor receptor binding        | 1 | 3 | 0.1913587 | 4254 KIT ligand                                                          |
| GO spinal cord oligodendrocyte cell fate    | 1 | 3 | 0.1913587 | 429 achaete-scute complex homolog 1 (Drosophila)                         |



|                                            |   |   |           |                                                                               |
|--------------------------------------------|---|---|-----------|-------------------------------------------------------------------------------|
| GO myosin light chain kinase activity      | 1 | 3 | 0.1913587 | 4638 myosin light chain kinase                                                |
| GO ionotropic glutamate receptor bindin    | 1 | 3 | 0.1913587 | 4645 myosin VB                                                                |
| GO axon extension involved in developm     | 1 | 3 | 0.1913587 | 4692 necdin homolog (mouse)                                                   |
| GO I-kappaB/NF-kappaB complex              | 1 | 3 | 0.1913587 | 4792 nuclear factor of kappa light polypeptide gene enhancer in B-cells inhib |
| GO regulation of NF-kappaB import into i   | 1 | 3 | 0.1913587 | 4792 nuclear factor of kappa light polypeptide gene enhancer in B-cells inhib |
| GO multicellular organismal response to    | 1 | 3 | 0.1913587 | 4842 nitric oxide synthase 1 (neuronal)                                       |
| GO negative regulation of calcium ion tra  | 1 | 3 | 0.1913587 | 4842 nitric oxide synthase 1 (neuronal)                                       |
| GO nitric-oxide synthase activity          | 1 | 3 | 0.1913587 | 4842 nitric oxide synthase 1 (neuronal)                                       |
| GO tetrahydrobiopterin binding             | 1 | 3 | 0.1913587 | 4842 nitric oxide synthase 1 (neuronal)                                       |
| GO neurotrophin binding                    | 1 | 3 | 0.1913587 | 4915 neurotrophic tyrosine kinase, receptor, type 2                           |
| GO phenylalanine 4-monooxygenase acti      | 1 | 3 | 0.1913587 | 5053 phenylalanine hydroxylase                                                |
| GO rRNA methyltransferase activity         | 1 | 3 | 0.1913587 | 51093 chromosome 1 open reading frame 66                                      |
| GO rRNA modification                       | 1 | 3 | 0.1913587 | 51093 chromosome 1 open reading frame 66                                      |
| GO calmodulin-dependent cyclic-nucleot     | 1 | 3 | 0.1913587 | 5136 phosphodiesterase 1A, calmodulin-dependent                               |
| GO cell-substrate junction                 | 1 | 3 | 0.1913587 | 5239 phosphoglucomutase 5                                                     |
| GO growth hormone receptor signaling p     | 1 | 3 | 0.1913587 | 5295 phosphoinositide-3-kinase, regulatory subunit 1 (alpha)                  |
| GO phosphoinositide 3-kinase regulator ;   | 1 | 3 | 0.1913587 | 5295 phosphoinositide-3-kinase, regulatory subunit 1 (alpha)                  |
| GO smooth muscle cell migration            | 1 | 3 | 0.1913587 | 5327 plasminogen activator, tissue                                            |
| GO procollagen-lysine 5-dioxygenase act    | 1 | 3 | 0.1913587 | 5351 procollagen-lysine 1, 2-oxoglutarate 5-dioxygenase 1                     |
| GO centrosome localization                 | 1 | 3 | 0.1913587 | 5362 plexin A2                                                                |
| GO limb bud formation                      | 1 | 3 | 0.1913587 | 5362 plexin A2                                                                |
| GO negative regulation of synaptic transp  | 1 | 3 | 0.1913587 | 5367 pro-melanin-concentrating hormone                                        |
| GO positive regulation of circadian sleep, | 1 | 3 | 0.1913587 | 5367 pro-melanin-concentrating hormone                                        |
| GO cobalt ion binding                      | 1 | 3 | 0.1913587 | 5371 promyelocytic leukemia                                                   |
| GO mesenchymal to epithelial transition    | 1 | 3 | 0.1913587 | 54361 wingless-type MMTV integration site family, member 4                    |
| GO tertiary branching involved in mamm     | 1 | 3 | 0.1913587 | 54361 wingless-type MMTV integration site family, member 4                    |
| GO miRNA binding                           | 1 | 3 | 0.1913587 | 5460 POU class 5 homeobox 1                                                   |
| GO response to nematode                    | 1 | 3 | 0.1913587 | 55600 intelectin 1 (galactofuranose binding)                                  |
| GO DNA damage induced protein phospho      | 1 | 3 | 0.1913587 | 5608 mitogen-activated protein kinase kinase 6                                |
| GO inorganic phosphate transmembrane       | 1 | 3 | 0.1913587 | 56172 ankylosis, progressive homolog (mouse)                                  |
| GO outer membrane                          | 1 | 3 | 0.1913587 | 56172 ankylosis, progressive homolog (mouse)                                  |
| GO intracellular calcium activated chloric | 1 | 3 | 0.1913587 | 56923 neuromedin U receptor 2                                                 |
| GO reduction of food intake in response    | 1 | 3 | 0.1913587 | 56923 neuromedin U receptor 2                                                 |
| GO activation of Ral GTPase activity       | 1 | 3 | 0.1913587 | 57186 Ral GTPase activating protein, alpha subunit 2 (catalytic)              |
| GO Ral GTPase activator activity           | 1 | 3 | 0.1913587 | 57186 Ral GTPase activating protein, alpha subunit 2 (catalytic)              |
| GO platelet activating factor receptor act | 1 | 3 | 0.1913587 | 5724 platelet-activating factor receptor                                      |

|                                            |   |   |           |                                                                                 |
|--------------------------------------------|---|---|-----------|---------------------------------------------------------------------------------|
| GO chaperone cofactor-dependent prote      | 1 | 3 | 0.1913587 | 573 BCL2-associated athanogene                                                  |
| GO somatic diversification of immunoglo    | 1 | 3 | 0.1913587 | 57379 activation-induced cytidine deaminase                                     |
| GO cyclooxygenase pathway                  | 1 | 3 | 0.1913587 | 5742 prostaglandin-endoperoxide synthase 1 (prostaglandin G/H synthase a        |
| GO uterus development                      | 1 | 3 | 0.1913587 | 5950 retinol binding protein 4, plasma                                          |
| GO midgut development                      | 1 | 3 | 0.1913587 | 6256 retinoid X receptor, alpha                                                 |
| GO retinoid-X receptor activity            | 1 | 3 | 0.1913587 | 6256 retinoid X receptor, alpha                                                 |
| GO ventricular cardiac muscle cell differe | 1 | 3 | 0.1913587 | 6256 retinoid X receptor, alpha                                                 |
| GO vitamin D response element binding      | 1 | 3 | 0.1913587 | 6256 retinoid X receptor, alpha                                                 |
| GO regulation of retinal cell programme    | 1 | 3 | 0.1913587 | 627 brain-derived neurotrophic factor                                           |
| GO detection of biotic stimulus            | 1 | 3 | 0.1913587 | 64127 nucleotide-binding oligomerization domain containing 2                    |
| GO innate immune response in mucosa        | 1 | 3 | 0.1913587 | 64127 nucleotide-binding oligomerization domain containing 2                    |
| GO positive regulation of interleukin-17 p | 1 | 3 | 0.1913587 | 64127 nucleotide-binding oligomerization domain containing 2                    |
| GO beta-galactoside alpha-2,3-sialyltrans  | 1 | 3 | 0.1913587 | 6484 ST3 beta-galactoside alpha-2,3-sialyltransferase 4                         |
| GO cellular response to water deprivatio   | 1 | 3 | 0.1913587 | 6494 signal-induced proliferation-associated 1                                  |
| GO Rap GTPase activator activity           | 1 | 3 | 0.1913587 | 6494 signal-induced proliferation-associated 1                                  |
| GO D-aspartate import                      | 1 | 3 | 0.1913587 | 6505 solute carrier family 1 (neuronal/epithelial high affinity glutamate trans |
| GO endocardial cushion development         | 1 | 3 | 0.1913587 | 652 bone morphogenetic protein 4                                                |
| GO positive regulation of cartilage develo | 1 | 3 | 0.1913587 | 652 bone morphogenetic protein 4                                                |
| GO prostate gland morphogenesis            | 1 | 3 | 0.1913587 | 652 bone morphogenetic protein 4                                                |
| GO renal system process                    | 1 | 3 | 0.1913587 | 652 bone morphogenetic protein 4                                                |
| GO specification of organ position         | 1 | 3 | 0.1913587 | 652 bone morphogenetic protein 4                                                |
| GO trachea development                     | 1 | 3 | 0.1913587 | 652 bone morphogenetic protein 4                                                |
| GO protein anchor                          | 1 | 3 | 0.1913587 | 6521 solute carrier family 4, anion exchanger, member 1 (erythrocyte memb       |
| GO basic amino acid transmembrane tra      | 1 | 3 | 0.1913587 | 6542 solute carrier family 7 (cationic amino acid transporter, y+ system), me   |
| GO mitochondrial ATP synthesis coupled     | 1 | 3 | 0.1913587 | 6622 synuclein, alpha (non A4 component of amyloid precursor)                   |
| GO negative regulation of histone acetyl   | 1 | 3 | 0.1913587 | 6622 synuclein, alpha (non A4 component of amyloid precursor)                   |
| GO positive regulation of neurotransmitt   | 1 | 3 | 0.1913587 | 6622 synuclein, alpha (non A4 component of amyloid precursor)                   |
| GO intrinsic to internal side of plasma me | 1 | 3 | 0.1913587 | 6710 spectrin, beta, erythrocytic                                               |
| GO clathrin sculpted acetylcholine transp  | 1 | 3 | 0.1913587 | 6857 synaptotagmin I                                                            |
| GO thioredoxin peroxidase activity         | 1 | 3 | 0.1913587 | 7001 peroxiredoxin 2                                                            |
| GO cardiac epithelial to mesenchymal tra   | 1 | 3 | 0.1913587 | 7049 transforming growth factor, beta receptor III                              |
| GO inhibin-beta glycan-ActRII complex      | 1 | 3 | 0.1913587 | 7049 transforming growth factor, beta receptor III                              |
| GO response to molecule of fungal origin   | 1 | 3 | 0.1913587 | 7097 toll-like receptor 2                                                       |
| GO detection of lipopolysaccharide         | 1 | 3 | 0.1913587 | 7099 toll-like receptor 4                                                       |
| GO positive regulation of interferon-alph  | 1 | 3 | 0.1913587 | 7099 toll-like receptor 4                                                       |
| GO myofibril assembly                      | 1 | 3 | 0.1913587 | 7111 tropomodulin 1                                                             |

|    |                                                   |    |     |           |                                                                              |
|----|---------------------------------------------------|----|-----|-----------|------------------------------------------------------------------------------|
| GO | granulosa cell differentiation                    | 1  | 3   | 0.1913587 | 726 calpain 5                                                                |
| GO | cellular response to calcium ion                  | 1  | 3   | 0.1913587 | 7474 wingless-type MMTV integration site family, member 5A                   |
| GO | epithelial cell proliferation involved in         | 1  | 3   | 0.1913587 | 7474 wingless-type MMTV integration site family, member 5A                   |
| GO | frizzled binding                                  | 1  | 3   | 0.1913587 | 7474 wingless-type MMTV integration site family, member 5A                   |
| GO | positive regulation of protein kinase C           | 1  | 3   | 0.1913587 | 7474 wingless-type MMTV integration site family, member 5A                   |
| GO | positive regulation of T cell chemotaxis          | 1  | 3   | 0.1913587 | 7474 wingless-type MMTV integration site family, member 5A                   |
| GO | regulation of branching involved in morphogenesis | 1  | 3   | 0.1913587 | 7474 wingless-type MMTV integration site family, member 5A                   |
| GO | acetate-CoA ligase activity                       | 1  | 3   | 0.1913587 | 79611 acyl-CoA synthetase short-chain family member 3                        |
| GO | calcitonin receptor activity                      | 1  | 3   | 0.1913587 | 799 calcitonin receptor                                                      |
| GO | microtubule-based flagellum part                  | 1  | 3   | 0.1913587 | 799 calcitonin receptor                                                      |
| GO | positive regulation of interleukin-1 alpha        | 1  | 3   | 0.1913587 | 834 caspase 1, apoptosis-related cysteine peptidase (interleukin 1, beta, co |
| GO | inner ear receptor stereocilium organ             | 1  | 3   | 0.1913587 | 84059 G protein-coupled receptor 98                                          |
| GO | fibroblast migration                              | 1  | 3   | 0.1913587 | 84159 AT rich interactive domain 5B (MRF1-like)                              |
| GO | peptide transporter activity                      | 1  | 3   | 0.1913587 | 84976 dispatched homolog 1 (Drosophila)                                      |
| GO | peptide transport                                 | 1  | 3   | 0.1913587 | 84976 dispatched homolog 1 (Drosophila)                                      |
| GO | diacylglycerol metabolic process                  | 1  | 3   | 0.1913587 | 8527 diacylglycerol kinase, delta 130kDa                                     |
| GO | second-messenger-mediated signaling               | 1  | 3   | 0.1913587 | 8527 diacylglycerol kinase, delta 130kDa                                     |
| GO | positive regulation of megakaryocyte              | 1  | 3   | 0.1913587 | 85477 scinderin                                                              |
| GO | syndecan binding                                  | 1  | 3   | 0.1913587 | 8646 chordin                                                                 |
| GO | sodium:bicarbonate symporter activity             | 1  | 3   | 0.1913587 | 8671 solute carrier family 4, sodium bicarbonate cotransporter, member 4     |
| GO | axon hillock                                      | 1  | 3   | 0.1913587 | 885 cholecystokinin                                                          |
| GO | pantetheine hydrolase activity                    | 1  | 3   | 0.1913587 | 8875 vanin 2                                                                 |
| GO | spongiotrophoblast differentiation                | 1  | 3   | 0.1913587 | 9021 suppressor of cytokine signaling 3                                      |
| GO | sulfate assimilation                              | 1  | 3   | 0.1913587 | 9060 3'-phosphoadenosine 5'-phosphosulfate synthase 2                        |
| GO | regulation of actin polymerization or             | 1  | 3   | 0.1913587 | 9087 thymosin beta 4, Y-linked                                               |
| GO | positive regulation of activin receptor           | 1  | 3   | 0.1913587 | 91 activin A receptor, type IB                                               |
| GO | phosphatidylinositol-4-phosphate binding          | 1  | 3   | 0.1913587 | 91404 SEC14 and spectrin domains 1                                           |
| GO | transforming growth factor beta receptor          | 1  | 3   | 0.1913587 | 94 activin A receptor type II-like 1                                         |
| GO | intrinsic to Golgi membrane                       | 1  | 3   | 0.1913587 | 9435 carbohydrate (N-acetylglucosamine-6-O) sulfotransferase 2               |
| GO | NAD+ nucleosidase activity                        | 1  | 3   | 0.1913587 | 952 CD38 molecule                                                            |
| GO | histone H3 deacetylation                          | 1  | 3   | 0.1913587 | 9734 histone deacetylase 9                                                   |
| GO | histone H4 deacetylation                          | 1  | 3   | 0.1913587 | 9734 histone deacetylase 9                                                   |
| GO | rhombomere 5 development                          | 1  | 3   | 0.1913587 | 9935 v-maf musculoaponeurotic fibrosarcoma oncogene homolog B (avian)        |
| GO | receptor binding                                  | 18 | 211 | 0.195819  | 10417 spondin 2, extracellular matrix protein                                |
| GO | receptor binding                                  | 18 | 211 | 0.195819  | 10507 sema domain, immunoglobulin domain (Ig), transmembrane domain (T       |
| GO | receptor binding                                  | 18 | 211 | 0.195819  | 112 adenylate cyclase 6                                                      |

|                                            |    |     |           |                                                                                 |
|--------------------------------------------|----|-----|-----------|---------------------------------------------------------------------------------|
| GO receptor binding                        | 18 | 211 | 0.195819  | 1803 dipeptidyl-peptidase 4                                                     |
| GO receptor binding                        | 18 | 211 | 0.195819  | 23529 cardiotrophin-like cytokine factor 1                                      |
| GO receptor binding                        | 18 | 211 | 0.195819  | 23780 apolipoprotein L, 2                                                       |
| GO receptor binding                        | 18 | 211 | 0.195819  | 30010 neurexophilin 1                                                           |
| GO receptor binding                        | 18 | 211 | 0.195819  | 3827 kininogen 1                                                                |
| GO receptor binding                        | 18 | 211 | 0.195819  | 4692 necdin homolog (mouse)                                                     |
| GO receptor binding                        | 18 | 211 | 0.195819  | 5025 purinergic receptor P2X, ligand-gated ion channel, 4                       |
| GO receptor binding                        | 18 | 211 | 0.195819  | 55600 intelectin 1 (galactofuranose binding)                                    |
| GO receptor binding                        | 18 | 211 | 0.195819  | 5972 renin                                                                      |
| GO receptor binding                        | 18 | 211 | 0.195819  | 6604 SWI/SNF related, matrix associated, actin dependent regulator of chromatin |
| GO receptor binding                        | 18 | 211 | 0.195819  | 718 complement component 3                                                      |
| GO receptor binding                        | 18 | 211 | 0.195819  | 8740 tumor necrosis factor (ligand) superfamily, member 14                      |
| GO receptor binding                        | 18 | 211 | 0.195819  | 8744 tumor necrosis factor (ligand) superfamily, member 9                       |
| GO receptor binding                        | 18 | 211 | 0.195819  | 9788 metastasis suppressor 1                                                    |
| GO receptor binding                        | 18 | 211 | 0.195819  | 9966 tumor necrosis factor (ligand) superfamily, member 15                      |
| GO cholesterol transport                   | 2  | 12  | 0.1959229 | 1080 cystic fibrosis transmembrane conductance regulator (ATP-binding cassette) |
| GO cholesterol transport                   | 2  | 12  | 0.1959229 | 3949 low density lipoprotein receptor                                           |
| GO Rac GTPase binding                      | 2  | 12  | 0.1959229 | 10811 NADPH oxidase activator 1                                                 |
| GO Rac GTPase binding                      | 2  | 12  | 0.1959229 | 27035 NADPH oxidase 1                                                           |
| GO microvillus membrane                    | 2  | 12  | 0.1959229 | 112 adenylate cyclase 6                                                         |
| GO microvillus membrane                    | 2  | 12  | 0.1959229 | 8842 prominin 1                                                                 |
| GO keratinocyte proliferation              | 2  | 12  | 0.1959229 | 11202 kallikrein-related peptidase 8                                            |
| GO keratinocyte proliferation              | 2  | 12  | 0.1959229 | 195814 short chain dehydrogenase/reductase family 16C, member 5                 |
| GO positive regulation of macrophage de    | 2  | 12  | 0.1959229 | 1435 colony stimulating factor 1 (macrophage)                                   |
| GO positive regulation of macrophage de    | 2  | 12  | 0.1959229 | 183 angiotensinogen (serpin peptidase inhibitor, clade A, member 8)             |
| GO lysosphingolipid and lysophosphatidi    | 2  | 12  | 0.1959229 | 1901 sphingosine-1-phosphate receptor 1                                         |
| GO lysosphingolipid and lysophosphatidi    | 2  | 12  | 0.1959229 | 1902 lysophosphatidic acid receptor 1                                           |
| GO neuromuscular synaptic transmission     | 2  | 12  | 0.1959229 | 1960 early growth response 3                                                    |
| GO neuromuscular synaptic transmission     | 2  | 12  | 0.1959229 | 23095 kinesin family member 1B                                                  |
| GO eye photoreceptor cell development      | 2  | 12  | 0.1959229 | 23418 crumbs homolog 1 (Drosophila)                                             |
| GO eye photoreceptor cell development      | 2  | 12  | 0.1959229 | 6096 RAR-related orphan receptor B                                              |
| GO positive regulation of caspase activity | 2  | 12  | 0.1959229 | 29108 PYD and CARD domain containing                                            |
| GO positive regulation of caspase activity | 2  | 12  | 0.1959229 | 83595 SRY (sex determining region Y)-box 7                                      |
| GO tissue homeostasis                      | 2  | 12  | 0.1959229 | 29123 ankyrin repeat domain 11                                                  |
| GO tissue homeostasis                      | 2  | 12  | 0.1959229 | 5025 purinergic receptor P2X, ligand-gated ion channel, 4                       |
| GO insulin receptor substrate binding      | 2  | 12  | 0.1959229 | 3643 insulin receptor                                                           |

|    |                                         |    |     |           |                                                                             |
|----|-----------------------------------------|----|-----|-----------|-----------------------------------------------------------------------------|
| GO | insulin receptor substrate binding      | 2  | 12  | 0.1959229 | 5295 phosphoinositide-3-kinase, regulatory subunit 1 (alpha)                |
| GO | low-density lipoprotein particle        | 2  | 12  | 0.1959229 | 3949 low density lipoprotein receptor                                       |
| GO | low-density lipoprotein particle        | 2  | 12  | 0.1959229 | 6653 sortilin-related receptor, L(DLR class) A repeats-containing           |
| GO | melanocyte differentiation              | 2  | 12  | 0.1959229 | 4286 microphthalmia-associated transcription factor                         |
| GO | melanocyte differentiation              | 2  | 12  | 0.1959229 | 5873 RAB27A, member RAS oncogene family                                     |
| GO | positive regulation of calcium ion tra  | 2  | 12  | 0.1959229 | 5025 purinergic receptor P2X, ligand-gated ion channel, 4                   |
| GO | positive regulation of calcium ion tra  | 2  | 12  | 0.1959229 | 57620 stromal interaction molecule 2                                        |
| GO | retinoic acid receptor signaling pathv  | 2  | 12  | 0.1959229 | 5371 promyelocytic leukemia                                                 |
| GO | retinoic acid receptor signaling pathv  | 2  | 12  | 0.1959229 | 6256 retinoid X receptor, alpha                                             |
| GO | positive regulation of stress-activatec | 2  | 12  | 0.1959229 | 64127 nucleotide-binding oligomerization domain containing 2                |
| GO | positive regulation of stress-activatec | 2  | 12  | 0.1959229 | 7099 toll-like receptor 4                                                   |
| GO | anion transmembrane transporter ac      | 2  | 12  | 0.1959229 | 6521 solute carrier family 4, anion exchanger, member 1 (erythrocyte memb   |
| GO | anion transmembrane transporter ac      | 2  | 12  | 0.1959229 | 8671 solute carrier family 4, sodium bicarbonate cotransporter, member 4    |
| GO | caspase inhibitor activity              | 2  | 12  | 0.1959229 | 6622 synuclein, alpha (non A4 component of amyloid precursor)               |
| GO | caspase inhibitor activity              | 2  | 12  | 0.1959229 | 8740 tumor necrosis factor (ligand) superfamily, member 14                  |
| GO | protein tyrosine phosphatase activity   | 8  | 82  | 0.1967798 | 10076 protein tyrosine phosphatase, receptor type, U                        |
| GO | protein tyrosine phosphatase activity   | 8  | 82  | 0.1967798 | 1844 dual specificity phosphatase 2                                         |
| GO | protein tyrosine phosphatase activity   | 8  | 82  | 0.1967798 | 1847 dual specificity phosphatase 5                                         |
| GO | protein tyrosine phosphatase activity   | 8  | 82  | 0.1967798 | 26191 protein tyrosine phosphatase, non-receptor type 22 (lymphoid)         |
| GO | protein tyrosine phosphatase activity   | 8  | 82  | 0.1967798 | 54961 slingshot homolog 3 (Drosophila)                                      |
| GO | protein tyrosine phosphatase activity   | 8  | 82  | 0.1967798 | 5774 protein tyrosine phosphatase, non-receptor type 3                      |
| GO | protein tyrosine phosphatase activity   | 8  | 82  | 0.1967798 | 5801 protein tyrosine phosphatase, receptor type, R                         |
| GO | protein tyrosine phosphatase activity   | 8  | 82  | 0.1967798 | 8556 CDC14 cell division cycle 14 homolog A (S. cerevisiae)                 |
| GO | positive regulation of transcription    | 13 | 146 | 0.1987917 | 10891 peroxisome proliferator-activated receptor gamma, coactivator 1 alpha |
| GO | positive regulation of transcription    | 13 | 146 | 0.1987917 | 1958 early growth response 1                                                |
| GO | positive regulation of transcription    | 13 | 146 | 0.1987917 | 222546 regulatory factor X, 6                                               |
| GO | positive regulation of transcription    | 13 | 146 | 0.1987917 | 2353 FBJ murine osteosarcoma viral oncogene homolog                         |
| GO | positive regulation of transcription    | 13 | 146 | 0.1987917 | 2737 GLI family zinc finger 3                                               |
| GO | positive regulation of transcription    | 13 | 146 | 0.1987917 | 285704 RGM domain family, member B                                          |
| GO | positive regulation of transcription    | 13 | 146 | 0.1987917 | 3725 jun oncogene                                                           |
| GO | positive regulation of transcription    | 13 | 146 | 0.1987917 | 4087 SMAD family member 2                                                   |
| GO | positive regulation of transcription    | 13 | 146 | 0.1987917 | 4778 nuclear factor (erythroid-derived 2), 45kDa                            |
| GO | positive regulation of transcription    | 13 | 146 | 0.1987917 | 5465 peroxisome proliferator-activated receptor alpha                       |
| GO | positive regulation of transcription    | 13 | 146 | 0.1987917 | 6256 retinoid X receptor, alpha                                             |
| GO | positive regulation of transcription    | 13 | 146 | 0.1987917 | 7026 nuclear receptor subfamily 2, group F, member 2                        |
| GO | positive regulation of transcription    | 13 | 146 | 0.1987917 | 94 activin A receptor type II-like 1                                        |

|                                            |   |    |           |                                                                               |
|--------------------------------------------|---|----|-----------|-------------------------------------------------------------------------------|
| GO sulfotransferase activity               | 4 | 34 | 0.2002871 | 10090 uronyl-2-sulfotransferase                                               |
| GO sulfotransferase activity               | 4 | 34 | 0.2002871 | 6819 sulfotransferase family, cytosolic, 1C, member 2                         |
| GO sulfotransferase activity               | 4 | 34 | 0.2002871 | 8509 N-deacetylase/N-sulfotransferase (heparan glucosaminyl) 2                |
| GO sulfotransferase activity               | 4 | 34 | 0.2002871 | 9435 carbohydrate (N-acetylglucosamine-6-O) sulfotransferase 2                |
| GO PML body                                | 4 | 34 | 0.2002871 | 11200 CHK2 checkpoint homolog ( <i>S. pombe</i> )                             |
| GO PML body                                | 4 | 34 | 0.2002871 | 28996 homeodomain interacting protein kinase 2                                |
| GO PML body                                | 4 | 34 | 0.2002871 | 5371 promyelocytic leukemia                                                   |
| GO PML body                                | 4 | 34 | 0.2002871 | 81603 tripartite motif-containing 8                                           |
| GO activation of protein kinase C activity | 4 | 34 | 0.2002871 | 1906 endothelin 1                                                             |
| GO activation of protein kinase C activity | 4 | 34 | 0.2002871 | 56288 par-3 partitioning defective 3 homolog ( <i>C. elegans</i> )            |
| GO activation of protein kinase C activity | 4 | 34 | 0.2002871 | 8527 diacylglycerol kinase, delta 130kDa                                      |
| GO activation of protein kinase C activity | 4 | 34 | 0.2002871 | 885 cholecystokinin                                                           |
| GO humoral immune response                 | 4 | 34 | 0.2002871 | 29760 B-cell linker                                                           |
| GO humoral immune response                 | 4 | 34 | 0.2002871 | 3569 interleukin 6 (interferon, beta 2)                                       |
| GO humoral immune response                 | 4 | 34 | 0.2002871 | 5699 proteasome (prosome, macropain) subunit, beta type, 10                   |
| GO humoral immune response                 | 4 | 34 | 0.2002871 | 684 bone marrow stromal cell antigen 2                                        |
| GO response to calcium ion                 | 5 | 46 | 0.2037956 | 10628 thioredoxin interacting protein                                         |
| GO response to calcium ion                 | 5 | 46 | 0.2037956 | 1843 dual specificity phosphatase 1                                           |
| GO response to calcium ion                 | 5 | 46 | 0.2037956 | 2033 E1A binding protein p300                                                 |
| GO response to calcium ion                 | 5 | 46 | 0.2037956 | 311 annexin A11                                                               |
| GO response to calcium ion                 | 5 | 46 | 0.2037956 | 5122 proprotein convertase subtilisin/kexin type 1                            |
| GO Z disc                                  | 5 | 46 | 0.2037956 | 11155 LIM domain binding 3                                                    |
| GO Z disc                                  | 5 | 46 | 0.2037956 | 27295 PDZ and LIM domain 3                                                    |
| GO Z disc                                  | 5 | 46 | 0.2037956 | 5239 phosphoglucomutase 5                                                     |
| GO Z disc                                  | 5 | 46 | 0.2037956 | 6521 solute carrier family 4, anion exchanger, member 1 (erythrocyte memb     |
| GO Z disc                                  | 5 | 46 | 0.2037956 | 84033 obscurin, cytoskeletal calmodulin and titin-interacting RhoGEF          |
| GO regulation of ARF GTPase activity       | 3 | 23 | 0.205263  | 116984 ArfGAP with RhoGAP domain, ankyrin repeat and PH domain 2              |
| GO regulation of ARF GTPase activity       | 3 | 23 | 0.205263  | 3268 ArfGAP with FG repeats 2                                                 |
| GO regulation of ARF GTPase activity       | 3 | 23 | 0.205263  | 55616 ArfGAP with SH3 domain, ankyrin repeat and PH domain 3                  |
| GO developmental growth                    | 3 | 23 | 0.205263  | 127343 diencephalon/mesencephalon homeobox 1                                  |
| GO developmental growth                    | 3 | 23 | 0.205263  | 2737 GLI family zinc finger 3                                                 |
| GO developmental growth                    | 3 | 23 | 0.205263  | 4087 SMAD family member 2                                                     |
| GO neuromuscular process controlling b     | 3 | 23 | 0.205263  | 2055 ceroid-lipofuscinosis, neuronal 8 (epilepsy, progressive with mental ret |
| GO neuromuscular process controlling b     | 3 | 23 | 0.205263  | 53405 chloride intracellular channel 5                                        |
| GO neuromuscular process controlling b     | 3 | 23 | 0.205263  | 8013 nuclear receptor subfamily 4, group A, member 3                          |
| GO cell maturation                         | 3 | 23 | 0.205263  | 2624 GATA binding protein 2                                                   |

|                                            |    |     |           |                                                                             |
|--------------------------------------------|----|-----|-----------|-----------------------------------------------------------------------------|
| GO cell maturation                         | 3  | 23  | 0.205263  | 26468 LIM homeobox 6                                                        |
| GO cell maturation                         | 3  | 23  | 0.205263  | 5972 renin                                                                  |
| GO positive regulation of osteoblast diffe | 3  | 23  | 0.205263  | 3569 interleukin 6 (interferon, beta 2)                                     |
| GO positive regulation of osteoblast diffe | 3  | 23  | 0.205263  | 3570 interleukin 6 receptor                                                 |
| GO positive regulation of osteoblast diffe | 3  | 23  | 0.205263  | 652 bone morphogenetic protein 4                                            |
| GO steroid binding                         | 3  | 23  | 0.205263  | 4306 nuclear receptor subfamily 3, group C, member 2                        |
| GO steroid binding                         | 3  | 23  | 0.205263  | 54852 progesterin and adiponQ receptor family member V                      |
| GO steroid binding                         | 3  | 23  | 0.205263  | 6256 retinoid X receptor, alpha                                             |
| GO positive regulation of insulin secretio | 3  | 23  | 0.205263  | 5950 retinol binding protein 4, plasma                                      |
| GO positive regulation of insulin secretio | 3  | 23  | 0.205263  | 8660 insulin receptor substrate 2                                           |
| GO positive regulation of insulin secretio | 3  | 23  | 0.205263  | 952 CD38 molecule                                                           |
| GO neurotransmitter secretion              | 3  | 23  | 0.205263  | 6857 synaptotagmin I                                                        |
| GO neurotransmitter secretion              | 3  | 23  | 0.205263  | 8938 BAI1-associated protein 3                                              |
| GO neurotransmitter secretion              | 3  | 23  | 0.205263  | 9892 synaptosomal-associated protein, 91kDa homolog (mouse)                 |
| GO blood coagulation                       | 7  | 71  | 0.2103789 | 2153 coagulation factor V (proaccelerin, labile factor)                     |
| GO blood coagulation                       | 7  | 71  | 0.2103789 | 22915 multimerin 1                                                          |
| GO blood coagulation                       | 7  | 71  | 0.2103789 | 30008 EGF-containing fibulin-like extracellular matrix protein 2            |
| GO blood coagulation                       | 7  | 71  | 0.2103789 | 3587 interleukin 10 receptor, alpha                                         |
| GO blood coagulation                       | 7  | 71  | 0.2103789 | 5327 plasminogen activator, tissue                                          |
| GO blood coagulation                       | 7  | 71  | 0.2103789 | 5873 RAB27A, member RAS oncogene family                                     |
| GO blood coagulation                       | 7  | 71  | 0.2103789 | 725 complement component 4 binding protein, beta                            |
| GO FAD binding                             | 7  | 71  | 0.2103789 | 27035 NADPH oxidase 1                                                       |
| GO FAD binding                             | 7  | 71  | 0.2103789 | 316 aldehyde oxidase 1                                                      |
| GO FAD binding                             | 7  | 71  | 0.2103789 | 35 acyl-Coenzyme A dehydrogenase, C-2 to C-3 short chain                    |
| GO FAD binding                             | 7  | 71  | 0.2103789 | 4129 monoamine oxidase B                                                    |
| GO FAD binding                             | 7  | 71  | 0.2103789 | 4842 nitric oxide synthase 1 (neuronal)                                     |
| GO FAD binding                             | 7  | 71  | 0.2103789 | 56605 ERO1-like beta ( <i>S. cerevisiae</i> )                               |
| GO FAD binding                             | 7  | 71  | 0.2103789 | 79689 STEAP family member 4                                                 |
| GO positive regulation of transcription, C | 11 | 122 | 0.2120286 | 10891 peroxisome proliferator-activated receptor gamma, coactivator 1 alpha |
| GO positive regulation of transcription, C | 11 | 122 | 0.2120286 | 2114 v-ets erythroblastosis virus E26 oncogene homolog 2 (avian)            |
| GO positive regulation of transcription, C | 11 | 122 | 0.2120286 | 2122 MDS1 and EVI1 complex locus                                            |
| GO positive regulation of transcription, C | 11 | 122 | 0.2120286 | 2296 forkhead box C1                                                        |
| GO positive regulation of transcription, C | 11 | 122 | 0.2120286 | 2303 forkhead box C2 (MFH-1, mesenchyme forkhead 1)                         |
| GO positive regulation of transcription, C | 11 | 122 | 0.2120286 | 28996 homeodomain interacting protein kinase 2                              |
| GO positive regulation of transcription, C | 11 | 122 | 0.2120286 | 4087 SMAD family member 2                                                   |
| GO positive regulation of transcription, C | 11 | 122 | 0.2120286 | 4802 nuclear transcription factor Y, gamma                                  |

|    |                                         |    |     |           |                                                                                 |
|----|-----------------------------------------|----|-----|-----------|---------------------------------------------------------------------------------|
| GO | positive regulation of transcription, D | 11 | 122 | 0.2120286 | 51085 MLX interacting protein-like                                              |
| GO | positive regulation of transcription, D | 11 | 122 | 0.2120286 | 55810 forkhead box J2                                                           |
| GO | positive regulation of transcription, D | 11 | 122 | 0.2120286 | 6604 SWI/SNF related, matrix associated, actin dependent regulator of chromatin |
| GO | organ regeneration                      | 4  | 35  | 0.21484   | 10076 protein tyrosine phosphatase, receptor type, U                            |
| GO | organ regeneration                      | 4  | 35  | 0.21484   | 8013 nuclear receptor subfamily 4, group A, member 3                            |
| GO | organ regeneration                      | 4  | 35  | 0.21484   | 8531 cold shock domain protein A                                                |
| GO | organ regeneration                      | 4  | 35  | 0.21484   | 9021 suppressor of cytokine signaling 3                                         |
| GO | embryonic limb morphogenesis            | 4  | 35  | 0.21484   | 2201 fibrillin 2                                                                |
| GO | embryonic limb morphogenesis            | 4  | 35  | 0.21484   | 4853 Notch homolog 2 (Drosophila)                                               |
| GO | embryonic limb morphogenesis            | 4  | 35  | 0.21484   | 5396 paired related homeobox 1                                                  |
| GO | embryonic limb morphogenesis            | 4  | 35  | 0.21484   | 7474 wingless-type MMTV integration site family, member 5A                      |
| GO | extracellular matrix                    | 4  | 35  | 0.21484   | 2263 fibroblast growth factor receptor 2                                        |
| GO | extracellular matrix                    | 4  | 35  | 0.21484   | 4856 nephroblastoma overexpressed gene                                          |
| GO | extracellular matrix                    | 4  | 35  | 0.21484   | 5046 proprotein convertase subtilisin/kexin type 6                              |
| GO | extracellular matrix                    | 4  | 35  | 0.21484   | 5327 plasminogen activator, tissue                                              |
| GO | binding                                 | 39 | 500 | 0.2156733 | 10170 dehydrogenase/reductase (SDR family) member 9                             |
| GO | binding                                 | 39 | 500 | 0.2156733 | 11187 plakophilin 3                                                             |
| GO | binding                                 | 39 | 500 | 0.2156733 | 112724 retinol dehydrogenase 13 (all-trans/9-cis)                               |
| GO | binding                                 | 39 | 500 | 0.2156733 | 123096 solute carrier family 25, member 29                                      |
| GO | binding                                 | 39 | 500 | 0.2156733 | 125 alcohol dehydrogenase 1B (class I), beta polypeptide                        |
| GO | binding                                 | 39 | 500 | 0.2156733 | 1462 versican                                                                   |
| GO | binding                                 | 39 | 500 | 0.2156733 | 157506 retinol dehydrogenase 10 (all-trans)                                     |
| GO | binding                                 | 39 | 500 | 0.2156733 | 157855 potassium channel, subfamily U, member 1                                 |
| GO | binding                                 | 39 | 500 | 0.2156733 | 195814 short chain dehydrogenase/reductase family 16C, member 5                 |
| GO | binding                                 | 39 | 500 | 0.2156733 | 2201 fibrillin 2                                                                |
| GO | binding                                 | 39 | 500 | 0.2156733 | 22925 phospholipase A2 receptor 1, 180kDa                                       |
| GO | binding                                 | 39 | 500 | 0.2156733 | 23331 tetratricopeptide repeat domain 28                                        |
| GO | binding                                 | 39 | 500 | 0.2156733 | 23382 adenosylhomocysteinase-like 2                                             |
| GO | binding                                 | 39 | 500 | 0.2156733 | 257019 FERM domain containing 3                                                 |
| GO | binding                                 | 39 | 500 | 0.2156733 | 316 aldehyde oxidase 1                                                          |
| GO | binding                                 | 39 | 500 | 0.2156733 | 3294 hydroxysteroid (17-beta) dehydrogenase 2                                   |
| GO | binding                                 | 39 | 500 | 0.2156733 | 339766 HEAT repeat containing 7B1                                               |
| GO | binding                                 | 39 | 500 | 0.2156733 | 3437 interferon-induced protein with tetratricopeptide repeats 3                |
| GO | binding                                 | 39 | 500 | 0.2156733 | 345275 hydroxysteroid (17-beta) dehydrogenase 13                                |
| GO | binding                                 | 39 | 500 | 0.2156733 | 3823 killer cell lectin-like receptor subfamily C, member 3                     |
| GO | binding                                 | 39 | 500 | 0.2156733 | 399671 HEAT repeat containing 4                                                 |



|                                                  |    |     |           |                                                                                        |
|--------------------------------------------------|----|-----|-----------|----------------------------------------------------------------------------------------|
| GO binding                                       | 39 | 500 | 0.2156733 | 4065 lymphocyte antigen 75                                                             |
| GO binding                                       | 39 | 500 | 0.2156733 | 4246 secretoglobin, family 2A, member 1                                                |
| GO binding                                       | 39 | 500 | 0.2156733 | 50865 heme binding protein 1                                                           |
| GO binding                                       | 39 | 500 | 0.2156733 | 51309 armadillo repeat containing, X-linked 1                                          |
| GO binding                                       | 39 | 500 | 0.2156733 | 5318 plakophilin 2                                                                     |
| GO binding                                       | 39 | 500 | 0.2156733 | 54436 SH3 domain and tetratricopeptide repeats 1                                       |
| GO binding                                       | 39 | 500 | 0.2156733 | 55130 armadillo repeat containing 4                                                    |
| GO binding                                       | 39 | 500 | 0.2156733 | 55761 tetratricopeptide repeat domain 17                                               |
| GO binding                                       | 39 | 500 | 0.2156733 | 622 3-hydroxybutyrate dehydrogenase, type 1                                            |
| GO binding                                       | 39 | 500 | 0.2156733 | 7404 ubiquitously transcribed tetratricopeptide repeat gene, Y-linked                  |
| GO binding                                       | 39 | 500 | 0.2156733 | 79689 STEAP family member 4                                                            |
| GO binding                                       | 39 | 500 | 0.2156733 | 8013 nuclear receptor subfamily 4, group A, member 3                                   |
| GO binding                                       | 39 | 500 | 0.2156733 | 83857 transmembrane and tetratricopeptide repeat containing 1                          |
| GO binding                                       | 39 | 500 | 0.2156733 | 93349 SP140 nuclear body protein-like                                                  |
| GO binding                                       | 39 | 500 | 0.2156733 | 9481 solute carrier family 25, member 27                                               |
| GO binding                                       | 39 | 500 | 0.2156733 | 952 CD38 molecule                                                                      |
| GO binding                                       | 39 | 500 | 0.2156733 | 9563 hexose-6-phosphate dehydrogenase (glucose 1-dehydrogenase)                        |
| GO binding                                       | 39 | 500 | 0.2156733 | 9823 armadillo repeat containing, X-linked 2                                           |
| GO hydrolase activity, acting on acid anhydrides | 5  | 47  | 0.2162467 | 148229 ATPase, class I, type 8B, member 3                                              |
| GO hydrolase activity, acting on acid anhydrides | 5  | 47  | 0.2162467 | 493 ATPase, Ca <sup>++</sup> transporting, plasma membrane 4                           |
| GO hydrolase activity, acting on acid anhydrides | 5  | 47  | 0.2162467 | 498 ATP synthase, H <sup>+</sup> transporting, mitochondrial F1 complex, alpha subunit |
| GO hydrolase activity, acting on acid anhydrides | 5  | 47  | 0.2162467 | 79895 ATPase, class I, type 8B, member 4                                               |
| GO hydrolase activity, acting on acid anhydrides | 5  | 47  | 0.2162467 | 9914 ATPase, Ca <sup>++</sup> transporting, type 2C, member 2                          |
| GO SH3 domain binding                            | 9  | 97  | 0.217539  | 1815 dopamine receptor D4                                                              |
| GO SH3 domain binding                            | 9  | 97  | 0.217539  | 23092 Rho GTPase activating protein 26                                                 |
| GO SH3 domain binding                            | 9  | 97  | 0.217539  | 395 Rho GTPase activating protein 6                                                    |
| GO SH3 domain binding                            | 9  | 97  | 0.217539  | 5063 p21 protein (Cdc42/Rac)-activated kinase 3                                        |
| GO SH3 domain binding                            | 9  | 97  | 0.217539  | 55740 enabled homolog (Drosophila)                                                     |
| GO SH3 domain binding                            | 9  | 97  | 0.217539  | 6452 SH3-domain binding protein 2                                                      |
| GO SH3 domain binding                            | 9  | 97  | 0.217539  | 80115 BAI1-associated protein 2-like 2                                                 |
| GO SH3 domain binding                            | 9  | 97  | 0.217539  | 8751 ADAM metalloproteinase domain 15                                                  |
| GO SH3 domain binding                            | 9  | 97  | 0.217539  | 9788 metastasis suppressor 1                                                           |
| GO heme binding                                  | 10 | 110 | 0.2189991 | 1558 cytochrome P450, family 2, subfamily C, polypeptide 8                             |
| GO heme binding                                  | 10 | 110 | 0.2189991 | 1559 cytochrome P450, family 2, subfamily C, polypeptide 9                             |
| GO heme binding                                  | 10 | 110 | 0.2189991 | 1571 cytochrome P450, family 2, subfamily E, polypeptide 1                             |
| GO heme binding                                  | 10 | 110 | 0.2189991 | 1577 cytochrome P450, family 3, subfamily A, polypeptide 5                             |

|                                             |    |     |           |                                                                               |
|---------------------------------------------|----|-----|-----------|-------------------------------------------------------------------------------|
| GO heme binding                             | 10 | 110 | 0.2189991 | 4151 myoglobin                                                                |
| GO heme binding                             | 10 | 110 | 0.2189991 | 4842 nitric oxide synthase 1 (neuronal)                                       |
| GO heme binding                             | 10 | 110 | 0.2189991 | 50865 heme binding protein 1                                                  |
| GO heme binding                             | 10 | 110 | 0.2189991 | 5742 prostaglandin-endoperoxide synthase 1 (prostaglandin G/H synthase and    |
| GO heme binding                             | 10 | 110 | 0.2189991 | 6916 thromboxane A synthase 1 (platelet)                                      |
| GO heme binding                             | 10 | 110 | 0.2189991 | 79152 fatty acid 2-hydroxylase                                                |
| GO transferase activity, transferring glyco | 13 | 149 | 0.2190026 | 10317 UDP-Gal:betaGlcNAc beta 1,3-galactosyltransferase, polypeptide 5        |
| GO transferase activity, transferring glyco | 13 | 149 | 0.2190026 | 192134 UDP-GlcNAc:betaGal beta-1,3-N-acetylglucosaminyltransferase 6 (core    |
| GO transferase activity, transferring glyco | 13 | 149 | 0.2190026 | 2525 fucosyltransferase 3 (galactoside 3(4)-L-fucosyltransferase, Lewis blood |
| GO transferase activity, transferring glyco | 13 | 149 | 0.2190026 | 2526 fucosyltransferase 4 (alpha (1,3) fucosyltransferase, myeloid-specific)  |
| GO transferase activity, transferring glyco | 13 | 149 | 0.2190026 | 2589 UDP-N-acetyl-alpha-D-galactosamine:polypeptide N-acetylgalactosami       |
| GO transferase activity, transferring glyco | 13 | 149 | 0.2190026 | 374378 UDP-N-acetyl-alpha-D-galactosamine:polypeptide N-acetylgalactosami     |
| GO transferase activity, transferring glyco | 13 | 149 | 0.2190026 | 53947 alpha 1,4-galactosyltransferase                                         |
| GO transferase activity, transferring glyco | 13 | 149 | 0.2190026 | 56913 core 1 synthase, glycoprotein-N-acetylgalactosamine 3-beta-galactosyl   |
| GO transferase activity, transferring glyco | 13 | 149 | 0.2190026 | 79668 poly (ADP-ribose) polymerase family, member 8                           |
| GO transferase activity, transferring glyco | 13 | 149 | 0.2190026 | 79695 UDP-N-acetyl-alpha-D-galactosamine:polypeptide N-acetylgalactosami      |
| GO transferase activity, transferring glyco | 13 | 149 | 0.2190026 | 84875 poly (ADP-ribose) polymerase family, member 10                          |
| GO transferase activity, transferring glyco | 13 | 149 | 0.2190026 | 8706 beta-1,3-N-acetylgalactosaminyltransferase 1 (globoside blood group)     |
| GO transferase activity, transferring glyco | 13 | 149 | 0.2190026 | 93100 nicotinate phosphoribosyltransferase domain containing 1                |
| GO response to nutrient                     | 7  | 72  | 0.2204007 | 2182 acyl-CoA synthetase long-chain family member 4                           |
| GO response to nutrient                     | 7  | 72  | 0.2204007 | 240 arachidonate 5-lipoxygenase                                               |
| GO response to nutrient                     | 7  | 72  | 0.2204007 | 2642 glucagon receptor                                                        |
| GO response to nutrient                     | 7  | 72  | 0.2204007 | 51703 acyl-CoA synthetase long-chain family member 5                          |
| GO response to nutrient                     | 7  | 72  | 0.2204007 | 6256 retinoid X receptor, alpha                                               |
| GO response to nutrient                     | 7  | 72  | 0.2204007 | 6750 somatostatin                                                             |
| GO response to nutrient                     | 7  | 72  | 0.2204007 | 6751 somatostatin receptor 1                                                  |
| GO histone deacetylase activity             | 2  | 13  | 0.2216579 | 10014 histone deacetylase 5                                                   |
| GO histone deacetylase activity             | 2  | 13  | 0.2216579 | 9734 histone deacetylase 9                                                    |
| GO bone mineralization                      | 2  | 13  | 0.2216579 | 10117 enamelin                                                                |
| GO bone mineralization                      | 2  | 13  | 0.2216579 | 7071 Kruppel-like factor 10                                                   |
| GO induction of an organ                    | 2  | 13  | 0.2216579 | 10252 sprouty homolog 1, antagonist of FGF signaling (Drosophila)             |
| GO induction of an organ                    | 2  | 13  | 0.2216579 | 652 bone morphogenetic protein 4                                              |
| GO positive regulation of actin filament p  | 2  | 13  | 0.2216579 | 10435 CDC42 effector protein (Rho GTPase binding) 2                           |
| GO positive regulation of actin filament p  | 2  | 13  | 0.2216579 | 148170 CDC42 effector protein (Rho GTPase binding) 5                          |
| GO superoxide metabolic process             | 2  | 13  | 0.2216579 | 10811 NADPH oxidase activator 1                                               |
| GO superoxide metabolic process             | 2  | 13  | 0.2216579 | 27035 NADPH oxidase 1                                                         |

|    |                                          |   |    |           |        |                                                                          |
|----|------------------------------------------|---|----|-----------|--------|--------------------------------------------------------------------------|
| GO | acetylcholine receptor activity          | 2 | 13 | 0.2216579 | 1139   | cholinergic receptor, nicotinic, alpha 7                                 |
| GO | acetylcholine receptor activity          | 2 | 13 | 0.2216579 | 8973   | cholinergic receptor, nicotinic, alpha 6                                 |
| GO | lipid storage                            | 2 | 13 | 0.2216579 | 123    | perilipin 2                                                              |
| GO | lipid storage                            | 2 | 13 | 0.2216579 | 130399 | activin A receptor, type IC                                              |
| GO | carboxypeptidase activity                | 2 | 13 | 0.2216579 | 1363   | carboxypeptidase E                                                       |
| GO | carboxypeptidase activity                | 2 | 13 | 0.2216579 | 1368   | carboxypeptidase M                                                       |
| GO | positive regulation of phosphoinositid   | 2 | 13 | 0.2216579 | 183    | angiotensinogen (serpin peptidase inhibitor, clade A, member 8)          |
| GO | positive regulation of phosphoinositid   | 2 | 13 | 0.2216579 | 3479   | insulin-like growth factor 1 (somatomedin C)                             |
| GO | middle ear morphogenesis                 | 2 | 13 | 0.2216579 | 1906   | endothelin 1                                                             |
| GO | middle ear morphogenesis                 | 2 | 13 | 0.2216579 | 5396   | paired related homeobox 1                                                |
| GO | positive regulation of smooth muscle     | 2 | 13 | 0.2216579 | 1906   | endothelin 1                                                             |
| GO | positive regulation of smooth muscle     | 2 | 13 | 0.2216579 | 5742   | prostaglandin-endoperoxide synthase 1 (prostaglandin G/H synthase and    |
| GO | negative regulation of proteolysis       | 2 | 13 | 0.2216579 | 2055   | ceroid-lipofuscinosis, neuronal 8 (epilepsy, progressive with mental ret |
| GO | negative regulation of proteolysis       | 2 | 13 | 0.2216579 | 5327   | plasminogen activator, tissue                                            |
| GO | positive regulation vascular endothel    | 2 | 13 | 0.2216579 | 27035  | NADPH oxidase 1                                                          |
| GO | positive regulation vascular endothel    | 2 | 13 | 0.2216579 | 718    | complement component 3                                                   |
| GO | camera-type eye morphogenesis            | 2 | 13 | 0.2216579 | 2737   | GLI family zinc finger 3                                                 |
| GO | camera-type eye morphogenesis            | 2 | 13 | 0.2216579 | 652    | bone morphogenetic protein 4                                             |
| GO | negative regulation of fat cell differer | 2 | 13 | 0.2216579 | 28951  | tribbles homolog 2 (Drosophila)                                          |
| GO | negative regulation of fat cell differer | 2 | 13 | 0.2216579 | 7474   | wingless-type MMTV integration site family, member 5A                    |
| GO | labyrinthine layer blood vessel develk   | 2 | 13 | 0.2216579 | 3491   | cysteine-rich, angiogenic inducer, 61                                    |
| GO | labyrinthine layer blood vessel develk   | 2 | 13 | 0.2216579 | 3726   | jun B proto-oncogene                                                     |
| GO | MAP kinase kinase activity               | 2 | 13 | 0.2216579 | 4293   | mitogen-activated protein kinase kinase kinase 9                         |
| GO | MAP kinase kinase activity               | 2 | 13 | 0.2216579 | 5608   | mitogen-activated protein kinase kinase 6                                |
| GO | RNA catabolic process                    | 2 | 13 | 0.2216579 | 4939   | 2'-5'-oligoadenylate synthetase 2, 69/71kDa                              |
| GO | RNA catabolic process                    | 2 | 13 | 0.2216579 | 8635   | ribonuclease T2                                                          |
| GO | synaptic transmission, glutamatergic     | 2 | 13 | 0.2216579 | 5071   | Parkinson disease (autosomal recessive, juvenile) 2, parkin              |
| GO | synaptic transmission, glutamatergic     | 2 | 13 | 0.2216579 | 5327   | plasminogen activator, tissue                                            |
| GO | oogenesis                                | 2 | 13 | 0.2216579 | 54852  | progesterin and adipoQ receptor family member V                          |
| GO | oogenesis                                | 2 | 13 | 0.2216579 | 55124  | piwi-like 2 (Drosophila)                                                 |
| GO | protein targeting to membrane            | 2 | 13 | 0.2216579 | 56288  | par-3 partitioning defective 3 homolog (C. elegans)                      |
| GO | protein targeting to membrane            | 2 | 13 | 0.2216579 | 64108  | receptor (chemosensory) transporter protein 4                            |
| GO | T cell proliferation                     | 2 | 13 | 0.2216579 | 7001   | peroxiredoxin 2                                                          |
| GO | T cell proliferation                     | 2 | 13 | 0.2216579 | 8740   | tumor necrosis factor (ligand) superfamily, member 14                    |
| GO | ARF GTPase activator activity            | 3 | 24 | 0.2235348 | 116984 | ArfGAP with RhoGAP domain, ankyrin repeat and PH domain 2                |
| GO | ARF GTPase activator activity            | 3 | 24 | 0.2235348 | 3268   | ArfGAP with FG repeats 2                                                 |

|    |                                         |   |    |           |                                                                            |
|----|-----------------------------------------|---|----|-----------|----------------------------------------------------------------------------|
| GO | ARF GTPase activator activity           | 3 | 24 | 0.2235348 | 55616 ArfGAP with SH3 domain, ankyrin repeat and PH domain 3               |
| GO | G-protein signaling, coupled to cAMP    | 3 | 24 | 0.2235348 | 154 adrenergic, beta-2-, receptor, surface                                 |
| GO | G-protein signaling, coupled to cAMP    | 3 | 24 | 0.2235348 | 2642 glucagon receptor                                                     |
| GO | G-protein signaling, coupled to cAMP    | 3 | 24 | 0.2235348 | 5734 prostaglandin E receptor 4 (subtype EP4)                              |
| GO | negative regulation of inflammatory r   | 3 | 24 | 0.2235348 | 154 adrenergic, beta-2-, receptor, surface                                 |
| GO | negative regulation of inflammatory r   | 3 | 24 | 0.2235348 | 7133 tumor necrosis factor receptor superfamily, member 1B                 |
| GO | negative regulation of inflammatory r   | 3 | 24 | 0.2235348 | 7538 zinc finger protein 36, C3H type, homolog (mouse)                     |
| GO | visual learning                         | 3 | 24 | 0.2235348 | 1813 dopamine receptor D2                                                  |
| GO | visual learning                         | 3 | 24 | 0.2235348 | 3815 v-kit Hardy-Zuckerman 4 feline sarcoma viral oncogene homolog         |
| GO | visual learning                         | 3 | 24 | 0.2235348 | 3845 v-Ki-ras2 Kirsten rat sarcoma viral oncogene homolog                  |
| GO | lung alveolus development               | 3 | 24 | 0.2235348 | 3479 insulin-like growth factor 1 (somatomedin C)                          |
| GO | lung alveolus development               | 3 | 24 | 0.2235348 | 652 bone morphogenetic protein 4                                           |
| GO | lung alveolus development               | 3 | 24 | 0.2235348 | 91461 protein kinase domain containing, cytoplasmic homolog (mouse)        |
| GO | response to gamma radiation             | 3 | 24 | 0.2235348 | 3570 interleukin 6 receptor                                                |
| GO | response to gamma radiation             | 3 | 24 | 0.2235348 | 5371 promyelocytic leukemia                                                |
| GO | response to gamma radiation             | 3 | 24 | 0.2235348 | 9021 suppressor of cytokine signaling 3                                    |
| GO | learning                                | 3 | 24 | 0.2235348 | 3725 jun oncogene                                                          |
| GO | learning                                | 3 | 24 | 0.2235348 | 5071 Parkinson disease (autosomal recessive, juvenile) 2, parkin           |
| GO | learning                                | 3 | 24 | 0.2235348 | 5577 protein kinase, cAMP-dependent, regulatory, type II, beta             |
| GO | proteolysis involved in cellular protei | 3 | 24 | 0.2235348 | 5696 proteasome (prosome, macropain) subunit, beta type, 8 (large multifur |
| GO | proteolysis involved in cellular protei | 3 | 24 | 0.2235348 | 5698 proteasome (prosome, macropain) subunit, beta type, 9 (large multifur |
| GO | proteolysis involved in cellular protei | 3 | 24 | 0.2235348 | 5699 proteasome (prosome, macropain) subunit, beta type, 10                |
| GO | fatty acid biosynthetic process         | 5 | 48 | 0.2289272 | 10826 chromosome 5 open reading frame 4                                    |
| GO | fatty acid biosynthetic process         | 5 | 48 | 0.2289272 | 123099 degenerative spermatocyte homolog 2, lipid desaturase (Drosophila)  |
| GO | fatty acid biosynthetic process         | 5 | 48 | 0.2289272 | 5742 prostaglandin-endoperoxide synthase 1 (prostaglandin G/H synthase a   |
| GO | fatty acid biosynthetic process         | 5 | 48 | 0.2289272 | 6916 thromboxane A synthase 1 (platelet)                                   |
| GO | fatty acid biosynthetic process         | 5 | 48 | 0.2289272 | 79152 fatty acid 2-hydroxylase                                             |
| GO | phosphoprotein phosphatase activity     | 4 | 36 | 0.2296705 | 10106 CTD (carboxy-terminal domain, RNA polymerase II, polypeptide A) sma  |
| GO | phosphoprotein phosphatase activity     | 4 | 36 | 0.2296705 | 23035 PH domain and leucine rich repeat protein phosphatase 2              |
| GO | phosphoprotein phosphatase activity     | 4 | 36 | 0.2296705 | 23371 tensin like C1 domain containing phosphatase (tensin 2)              |
| GO | phosphoprotein phosphatase activity     | 4 | 36 | 0.2296705 | 8556 CDC14 cell division cycle 14 homolog A (S. cerevisiae)                |
| GO | somitogenesis                           | 4 | 36 | 0.2296705 | 2033 E1A binding protein p300                                              |
| GO | somitogenesis                           | 4 | 36 | 0.2296705 | 2296 forkhead box C1                                                       |
| GO | somitogenesis                           | 4 | 36 | 0.2296705 | 5362 plexin A2                                                             |
| GO | somitogenesis                           | 4 | 36 | 0.2296705 | 8313 axin 2                                                                |
| GO | response to organic substance           | 4 | 36 | 0.2296705 | 760 carbonic anhydrase II                                                  |

|                                      |    |     |           |                                                                  |
|--------------------------------------|----|-----|-----------|------------------------------------------------------------------|
| GO response to organic substance     | 4  | 36  | 0.2296705 | 8527 diacylglycerol kinase, delta 130kDa                         |
| GO response to organic substance     | 4  | 36  | 0.2296705 | 9414 tight junction protein 2 (zona occludens 2)                 |
| GO response to organic substance     | 4  | 36  | 0.2296705 | 9619 ATP-binding cassette, sub-family G (WHITE), member 1        |
| GO response to stress                | 10 | 112 | 0.2353436 | 10912 growth arrest and DNA-damage-inducible, gamma              |
| GO response to stress                | 10 | 112 | 0.2353436 | 23043 TRAF2 and NCK interacting kinase                           |
| GO response to stress                | 10 | 112 | 0.2353436 | 27035 NADPH oxidase 1                                            |
| GO response to stress                | 10 | 112 | 0.2353436 | 4616 growth arrest and DNA-damage-inducible, beta                |
| GO response to stress                | 10 | 112 | 0.2353436 | 5025 purinergic receptor P2X, ligand-gated ion channel, 4        |
| GO response to stress                | 10 | 112 | 0.2353436 | 5972 renin                                                       |
| GO response to stress                | 10 | 112 | 0.2353436 | 6446 serum/glucocorticoid regulated kinase 1                     |
| GO response to stress                | 10 | 112 | 0.2353436 | 760 carbonic anhydrase II                                        |
| GO response to stress                | 10 | 112 | 0.2353436 | 8600 tumor necrosis factor (ligand) superfamily, member 11       |
| GO response to stress                | 10 | 112 | 0.2353436 | 9537 tumor protein p53 inducible protein 11                      |
| GO female pregnancy                  | 6  | 61  | 0.2366756 | 2353 FBJ murine osteosarcoma viral oncogene homolog              |
| GO female pregnancy                  | 6  | 61  | 0.2366756 | 412 steroid sulfatase (microsomal), isozyme S                    |
| GO female pregnancy                  | 6  | 61  | 0.2366756 | 5016 oviductal glycoprotein 1, 120kDa                            |
| GO female pregnancy                  | 6  | 61  | 0.2366756 | 53405 chloride intracellular channel 5                           |
| GO female pregnancy                  | 6  | 61  | 0.2366756 | 6256 retinoid X receptor, alpha                                  |
| GO female pregnancy                  | 6  | 61  | 0.2366756 | 952 CD38 molecule                                                |
| GO phospholipid biosynthetic process | 5  | 49  | 0.2418162 | 10162 lysophosphatidylcholine acyltransferase 3                  |
| GO phospholipid biosynthetic process | 5  | 49  | 0.2418162 | 154141 membrane bound O-acyltransferase domain containing 1      |
| GO phospholipid biosynthetic process | 5  | 49  | 0.2418162 | 256987 serine incorporator 5                                     |
| GO phospholipid biosynthetic process | 5  | 49  | 0.2418162 | 51703 acyl-CoA synthetase long-chain family member 5             |
| GO phospholipid biosynthetic process | 5  | 49  | 0.2418162 | 54947 lysophosphatidylcholine acyltransferase 2                  |
| GO wound healing                     | 5  | 49  | 0.2418162 | 2331 fibromodulin                                                |
| GO wound healing                     | 5  | 49  | 0.2418162 | 375056 melanoma inhibitory activity family, member 3             |
| GO wound healing                     | 5  | 49  | 0.2418162 | 4015 lysyl oxidase                                               |
| GO wound healing                     | 5  | 49  | 0.2418162 | 5465 peroxisome proliferator-activated receptor alpha            |
| GO wound healing                     | 5  | 49  | 0.2418162 | 7474 wingless-type MMTV integration site family, member 5A       |
| GO metallopeptidase activity         | 3  | 25  | 0.2421067 | 1363 carboxypeptidase E                                          |
| GO metallopeptidase activity         | 3  | 25  | 0.2421067 | 1368 carboxypeptidase M                                          |
| GO metallopeptidase activity         | 3  | 25  | 0.2421067 | 57094 carboxypeptidase A6                                        |
| GO protein phosphatase binding       | 3  | 25  | 0.2421067 | 3643 insulin receptor                                            |
| GO protein phosphatase binding       | 3  | 25  | 0.2421067 | 5295 phosphoinositide-3-kinase, regulatory subunit 1 (alpha)     |
| GO protein phosphatase binding       | 3  | 25  | 0.2421067 | 8660 insulin receptor substrate 2                                |
| GO leukocyte cell-cell adhesion      | 3  | 25  | 0.2421067 | 3678 integrin, alpha 5 (fibronectin receptor, alpha polypeptide) |

|                                               |    |     |           |                                                                                        |
|-----------------------------------------------|----|-----|-----------|----------------------------------------------------------------------------------------|
| GO leukocyte cell-cell adhesion               | 3  | 25  | 0.2421067 | 3689 integrin, beta 2 (complement component 3 receptor 3 and 4 subunit)                |
| GO leukocyte cell-cell adhesion               | 3  | 25  | 0.2421067 | 6850 spleen tyrosine kinase                                                            |
| GO symporter activity                         | 10 | 113 | 0.2436812 | 10568 solute carrier family 34 (sodium phosphate), member 2                            |
| GO symporter activity                         | 10 | 113 | 0.2436812 | 151473 solute carrier family 16, member 14 (monocarboxylic acid transporter)           |
| GO symporter activity                         | 10 | 113 | 0.2436812 | 6505 solute carrier family 1 (neuronal/epithelial high affinity glutamate transporter) |
| GO symporter activity                         | 10 | 113 | 0.2436812 | 6535 solute carrier family 6 (neurotransmitter transporter, creatine), member 1        |
| GO symporter activity                         | 10 | 113 | 0.2436812 | 6564 solute carrier family 15 (oligopeptide transporter), member 1                     |
| GO symporter activity                         | 10 | 113 | 0.2436812 | 6565 solute carrier family 15 (H <sup>+</sup> /peptide transporter), member 2          |
| GO symporter activity                         | 10 | 113 | 0.2436812 | 84561 solute carrier family 12 (potassium/chloride transporters), member 8             |
| GO symporter activity                         | 10 | 113 | 0.2436812 | 8671 solute carrier family 4, sodium bicarbonate cotransporter, member 4               |
| GO symporter activity                         | 10 | 113 | 0.2436812 | 9194 solute carrier family 16, member 7 (monocarboxylic acid transporter 2)            |
| GO symporter activity                         | 10 | 113 | 0.2436812 | 9962 solute carrier family 23 (nucleobase transporters), member 2                      |
| GO activation of adenylate cyclase activity   | 4  | 37  | 0.2447449 | 112 adenylate cyclase 6                                                                |
| GO activation of adenylate cyclase activity   | 4  | 37  | 0.2447449 | 154 adrenergic, beta-2-, receptor, surface                                             |
| GO activation of adenylate cyclase activity   | 4  | 37  | 0.2447449 | 2642 glucagon receptor                                                                 |
| GO activation of adenylate cyclase activity   | 4  | 37  | 0.2447449 | 799 calcitonin receptor                                                                |
| GO protein amino acid sulfation               | 1  | 4   | 0.2466366 | 10090 uronyl-2-sulfotransferase                                                        |
| GO CTD phosphatase activity                   | 1  | 4   | 0.2466366 | 10106 CTD (carboxy-terminal domain, RNA polymerase II, polypeptide A) small            |
| GO branching involved in prostate gland       | 1  | 4   | 0.2466366 | 10116 fem-1 homolog b (C. elegans)                                                     |
| GO 9-cis-retinoic acid biosynthetic process   | 1  | 4   | 0.2466366 | 10170 dehydrogenase/reductase (SDR family) member 9                                    |
| GO base conversion or substitution editing    | 1  | 4   | 0.2466366 | 104 adenosine deaminase, RNA-specific, B1 (RED1 homolog rat)                           |
| GO regulation of respiratory burst            | 1  | 4   | 0.2466366 | 10811 NADPH oxidase activator 1                                                        |
| GO cellular glucose homeostasis               | 1  | 4   | 0.2466366 | 10891 peroxisome proliferator-activated receptor gamma, coactivator 1 alpha            |
| GO positive regulation of histone acetylation | 1  | 4   | 0.2466366 | 10891 peroxisome proliferator-activated receptor gamma, coactivator 1 alpha            |
| GO DNA damage response, signal transduction   | 1  | 4   | 0.2466366 | 11200 CHK2 checkpoint homolog (S. pombe)                                               |
| GO mammary duct terminal end bud growth       | 1  | 4   | 0.2466366 | 1435 colony stimulating factor 1 (macrophage)                                          |
| GO piP-body                                   | 1  | 4   | 0.2466366 | 143689 piwi-like 4 (Drosophila)                                                        |
| GO negative regulation of peptidase activity  | 1  | 4   | 0.2466366 | 1471 cystatin C                                                                        |
| GO heterocycle metabolic process              | 1  | 4   | 0.2466366 | 1571 cytochrome P450, family 2, subfamily E, polypeptide 1                             |
| GO nose development                           | 1  | 4   | 0.2466366 | 157506 retinol dehydrogenase 10 (all-trans)                                            |
| GO sphingomyelin biosynthetic process         | 1  | 4   | 0.2466366 | 166929 sphingomyelin synthase 2                                                        |
| GO zymogen granule membrane                   | 1  | 4   | 0.2466366 | 1755 deleted in malignant brain tumors 1                                               |
| GO regulation of cAMP metabolic process       | 1  | 4   | 0.2466366 | 1813 dopamine receptor D2                                                              |
| GO regulation of dopamine uptake              | 1  | 4   | 0.2466366 | 1813 dopamine receptor D2                                                              |
| GO positive regulation of kinase activity     | 1  | 4   | 0.2466366 | 1815 dopamine receptor D4                                                              |
| GO JUN kinase binding                         | 1  | 4   | 0.2466366 | 1822 atrophin 1                                                                        |

|                                                                |   |   |           |                                                                     |
|----------------------------------------------------------------|---|---|-----------|---------------------------------------------------------------------|
| GO toxin metabolic process                                     | 1 | 4 | 0.2466366 | 1822 atrophin 1                                                     |
| GO astrocyte activation                                        | 1 | 4 | 0.2466366 | 183 angiotensinogen (serpin peptidase inhibitor, clade A, member 8) |
| GO peptide hormone secretion                                   | 1 | 4 | 0.2466366 | 1906 endothelin 1                                                   |
| GO positive regulation of cell size                            | 1 | 4 | 0.2466366 | 1906 endothelin 1                                                   |
| GO vein smooth muscle contraction                              | 1 | 4 | 0.2466366 | 1906 endothelin 1                                                   |
| GO eukaryotic translation elongation factor 1 alpha 1          | 1 | 4 | 0.2466366 | 1915 eukaryotic translation elongation factor 1 alpha 1             |
| GO facial nerve structural organization                        | 1 | 4 | 0.2466366 | 1959 early growth response 2                                        |
| GO Schwann cell differentiation                                | 1 | 4 | 0.2466366 | 1959 early growth response 2                                        |
| GO phosphopyruvate hydratase activity                          | 1 | 4 | 0.2466366 | 2026 enolase 2 (gamma, neuronal)                                    |
| GO phosphopyruvate hydratase complex                           | 1 | 4 | 0.2466366 | 2026 enolase 2 (gamma, neuronal)                                    |
| GO peroxisome proliferator activated receptor gamma 1          | 1 | 4 | 0.2466366 | 2033 E1A binding protein p300                                       |
| GO response to cobalt ion                                      | 1 | 4 | 0.2466366 | 2033 E1A binding protein p300                                       |
| GO histone demethylase activity (H3-K9 specific)               | 1 | 4 | 0.2466366 | 23081 lysine (K)-specific demethylase 4C                            |
| GO cAMP response element binding protein 1                     | 1 | 4 | 0.2466366 | 23373 CREB regulated transcription coactivator 1                    |
| GO lipoxygenase pathway                                        | 1 | 4 | 0.2466366 | 240 arachidonate 5-lipoxygenase                                     |
| GO inner ear receptor cell differentiation                     | 1 | 4 | 0.2466366 | 26281 fibroblast growth factor 20                                   |
| GO cerebral cortex radially oriented cell division             | 1 | 4 | 0.2466366 | 26468 LIM homeobox 6                                                |
| GO forebrain neuron development                                | 1 | 4 | 0.2466366 | 26468 LIM homeobox 6                                                |
| GO NADP metabolic process                                      | 1 | 4 | 0.2466366 | 27035 NADPH oxidase 1                                               |
| GO regulation of systemic arterial blood pressure              | 1 | 4 | 0.2466366 | 27035 NADPH oxidase 1                                               |
| GO optic nerve morphogenesis                                   | 1 | 4 | 0.2466366 | 2737 GLI family zinc finger 3                                       |
| GO positive regulation of T-helper 1 cell differentiation      | 1 | 4 | 0.2466366 | 3142 H2.0-like homeobox                                             |
| GO positive regulation of estrogen receptor signaling pathway  | 1 | 4 | 0.2466366 | 3169 forkhead box A1                                                |
| GO testosterone 17-beta-dehydrogenase                          | 1 | 4 | 0.2466366 | 3294 hydroxysteroid (17-beta) dehydrogenase 2                       |
| GO chondroitin sulfate proteoglycan biosynthesis               | 1 | 4 | 0.2466366 | 3479 insulin-like growth factor 1 (somatomedin C)                   |
| GO lung lobe morphogenesis                                     | 1 | 4 | 0.2466366 | 3479 insulin-like growth factor 1 (somatomedin C)                   |
| GO positive regulation of granule cell precursor cell division | 1 | 4 | 0.2466366 | 3479 insulin-like growth factor 1 (somatomedin C)                   |
| GO water homeostasis                                           | 1 | 4 | 0.2466366 | 3479 insulin-like growth factor 1 (somatomedin C)                   |
| GO ciliary neurotrophic factor receptor signaling pathway      | 1 | 4 | 0.2466366 | 3570 interleukin 6 receptor                                         |
| GO lateral ventricle development                               | 1 | 4 | 0.2466366 | 358 aquaporin 1 (Colton blood group)                                |
| GO insulin-like growth factor II binding                       | 1 | 4 | 0.2466366 | 3643 insulin receptor                                               |
| GO regulation of gene-specific transcription                   | 1 | 4 | 0.2466366 | 3643 insulin receptor                                               |
| GO cell-cell adhesion mediated by integrin                     | 1 | 4 | 0.2466366 | 3678 integrin, alpha 5 (fibronectin receptor, alpha polypeptide)    |
| GO cell-substrate junction assembly                            | 1 | 4 | 0.2466366 | 3678 integrin, alpha 5 (fibronectin receptor, alpha polypeptide)    |
| GO calcium ion transmembrane transport                         | 1 | 4 | 0.2466366 | 3709 inositol 1,4,5-triphosphate receptor, type 2                   |
| GO platelet dense tubular network membrane                     | 1 | 4 | 0.2466366 | 3709 inositol 1,4,5-triphosphate receptor, type 2                   |

|                                                     |   |   |           |                                                                                      |
|-----------------------------------------------------|---|---|-----------|--------------------------------------------------------------------------------------|
| GO positive regulation by host of viral tra         | 1 | 4 | 0.2466366 | 3725 jun oncogene                                                                    |
| GO saliva secretion                                 | 1 | 4 | 0.2466366 | 3783 potassium intermediate/small conductance calcium-activated channel,             |
| GO myeloid leukocyte differentiation                | 1 | 4 | 0.2466366 | 3815 v-kit Hardy-Zuckerman 4 feline sarcoma viral oncogene homolog                   |
| GO positive regulation of Rac protein sig           | 1 | 4 | 0.2466366 | 3845 v-Ki-ras2 Kirsten rat sarcoma viral oncogene homolog                            |
| GO response to mineralocorticoid stimul             | 1 | 4 | 0.2466366 | 3845 v-Ki-ras2 Kirsten rat sarcoma viral oncogene homolog                            |
| GO very-low-density lipoprotein recepto             | 1 | 4 | 0.2466366 | 3949 low density lipoprotein receptor                                                |
| GO dopamine catabolic process                       | 1 | 4 | 0.2466366 | 4128 monoamine oxidase A                                                             |
| GO androgen binding                                 | 1 | 4 | 0.2466366 | 4246 secretoglobin, family 2A, member 1                                              |
| GO bone remodeling                                  | 1 | 4 | 0.2466366 | 4286 microphthalmia-associated transcription factor                                  |
| GO JUN kinase kinase kinase activity                | 1 | 4 | 0.2466366 | 4293 mitogen-activated protein kinase kinase kinase 9                                |
| GO cell-cell junction maintenance                   | 1 | 4 | 0.2466366 | 4359 myelin protein zero                                                             |
| GO negative regulation of lipid storage             | 1 | 4 | 0.2466366 | 4792 nuclear factor of kappa light polypeptide gene enhancer in B-cells inhib        |
| GO toll-like receptor 4 signaling pathway           | 1 | 4 | 0.2466366 | 4792 nuclear factor of kappa light polypeptide gene enhancer in B-cells inhib        |
| GO CCAAT-binding factor complex                     | 1 | 4 | 0.2466366 | 4802 nuclear transcription factor Y, gamma                                           |
| GO arginine binding                                 | 1 | 4 | 0.2466366 | 4842 nitric oxide synthase 1 (neuronal)                                              |
| GO compartment pattern formation                    | 1 | 4 | 0.2466366 | 4851 Notch homolog 1, translocation-associated (Drosophila)                          |
| GO positive regulation of glial cell differe        | 1 | 4 | 0.2466366 | 4851 Notch homolog 1, translocation-associated (Drosophila)                          |
| GO regulation of neurogenesis                       | 1 | 4 | 0.2466366 | 4851 Notch homolog 1, translocation-associated (Drosophila)                          |
| GO regulation of developmental process              | 1 | 4 | 0.2466366 | 4853 Notch homolog 2 (Drosophila)                                                    |
| GO neurotrophin receptor activity                   | 1 | 4 | 0.2466366 | 4915 neurotrophic tyrosine kinase, receptor, type 2                                  |
| GO regulation of respiratory gaseous exc            | 1 | 4 | 0.2466366 | 4929 nuclear receptor subfamily 4, group A, member 2                                 |
| GO ADP biosynthetic process                         | 1 | 4 | 0.2466366 | 498 ATP synthase, H <sup>+</sup> transporting, mitochondrial F1 complex, alpha subun |
| GO mitochondrial proton-transporting A <sup>-</sup> | 1 | 4 | 0.2466366 | 498 ATP synthase, H <sup>+</sup> transporting, mitochondrial F1 complex, alpha subun |
| GO nerve growth factor processing                   | 1 | 4 | 0.2466366 | 5046 proprotein convertase subtilisin/kexin type 6                                   |
| GO regulation of BMP signaling pathway              | 1 | 4 | 0.2466366 | 5046 proprotein convertase subtilisin/kexin type 6                                   |
| GO secretion by cell                                | 1 | 4 | 0.2466366 | 5046 proprotein convertase subtilisin/kexin type 6                                   |
| GO catecholamine biosynthetic process               | 1 | 4 | 0.2466366 | 5053 phenylalanine hydroxylase                                                       |
| GO aggresome assembly                               | 1 | 4 | 0.2466366 | 5071 Parkinson disease (autosomal recessive, juvenile) 2, parkin                     |
| GO norepinephrine metabolic process                 | 1 | 4 | 0.2466366 | 5071 Parkinson disease (autosomal recessive, juvenile) 2, parkin                     |
| GO positive regulation of lipid biosynthes          | 1 | 4 | 0.2466366 | 51085 MLX interacting protein-like                                                   |
| GO rRNA (adenine-N6,N6 <sup>-</sup> )-dimethyltran  | 1 | 4 | 0.2466366 | 51093 chromosome 1 open reading frame 66                                             |
| GO cGMP-mediated signaling                          | 1 | 4 | 0.2466366 | 5152 phosphodiesterase 9A                                                            |
| GO intercalated disc                                | 1 | 4 | 0.2466366 | 5239 phosphoglucomutase 5                                                            |
| GO phosphoglucomutase activity                      | 1 | 4 | 0.2466366 | 5239 phosphoglucomutase 5                                                            |
| GO ErbB-3 class receptor binding                    | 1 | 4 | 0.2466366 | 5295 phosphoinositide-3-kinase, regulatory subunit 1 (alpha)                         |
| GO auditory receptor cell stereocilium or           | 1 | 4 | 0.2466366 | 53405 chloride intracellular channel 5                                               |



|                                                                   |   |   |           |                                                                                        |
|-------------------------------------------------------------------|---|---|-----------|----------------------------------------------------------------------------------------|
| GO positive regulation of histone deacetylase activity            | 1 | 4 | 0.2466366 | 5371 promyelocytic leukemia                                                            |
| GO tube morphogenesis                                             | 1 | 4 | 0.2466366 | 54361 wingless-type MMTV integration site family, member 4                             |
| GO regulation of fatty acid metabolic process                     | 1 | 4 | 0.2466366 | 5465 peroxisome proliferator-activated receptor alpha                                  |
| GO platelet activating factor biosynthetic process                | 1 | 4 | 0.2466366 | 54947 lysophosphatidylcholine acyltransferase 2                                        |
| GO pi-body                                                        | 1 | 4 | 0.2466366 | 55124 piwi-like 2 (Drosophila)                                                         |
| GO phosphorylase kinase regulator activity                        | 1 | 4 | 0.2466366 | 55140 elongation protein 3 homolog (S. cerevisiae)                                     |
| GO transmembrane receptor protein tyrosine kinase activity        | 1 | 4 | 0.2466366 | 55816 docking protein 5                                                                |
| GO tight junction assembly                                        | 1 | 4 | 0.2466366 | 56288 par-3 partitioning defective 3 homolog (C. elegans)                              |
| GO calcium- and calmodulin-dependent protein kinase activity      | 1 | 4 | 0.2466366 | 57118 calcium/calmodulin-dependent protein kinase ID                                   |
| GO activation of store-operated calcium channel activity          | 1 | 4 | 0.2466366 | 57620 stromal interaction molecule 2                                                   |
| GO embryonic organ morphogenesis                                  | 1 | 4 | 0.2466366 | 5950 retinol binding protein 4, plasma                                                 |
| GO negative regulation of cardiac muscle cell proliferation       | 1 | 4 | 0.2466366 | 5950 retinol binding protein 4, plasma                                                 |
| GO vagina development                                             | 1 | 4 | 0.2466366 | 5950 retinol binding protein 4, plasma                                                 |
| GO melatonin receptor activity                                    | 1 | 4 | 0.2466366 | 6096 RAR-related orphan receptor B                                                     |
| GO retinoic acid receptor activity                                | 1 | 4 | 0.2466366 | 6256 retinoid X receptor, alpha                                                        |
| GO mechanoreceptor differentiation                                | 1 | 4 | 0.2466366 | 627 brain-derived neurotrophic factor                                                  |
| GO regulation of metabolic process                                | 1 | 4 | 0.2466366 | 627 brain-derived neurotrophic factor                                                  |
| GO positive regulation of TOR signaling pathway                   | 1 | 4 | 0.2466366 | 64083 golgi phosphoprotein 3 (coat-protein)                                            |
| GO positive regulation of humoral immune response                 | 1 | 4 | 0.2466366 | 64127 nucleotide-binding oligomerization domain containing 2                           |
| GO negative regulation of TOR signaling pathway                   | 1 | 4 | 0.2466366 | 64798 DEP domain containing 6                                                          |
| GO alpha-N-acetylneuraminic acid biosynthetic process             | 1 | 4 | 0.2466366 | 6489 ST8 alpha-N-acetyl-neuraminidase alpha-2,8-sialyltransferase 1                    |
| GO L-glutamate import                                             | 1 | 4 | 0.2466366 | 6505 solute carrier family 1 (neuronal/epithelial high affinity glutamate transporter) |
| GO lens induction in camera-type eye                              | 1 | 4 | 0.2466366 | 652 bone morphogenetic protein 4                                                       |
| GO negative regulation of mitosis                                 | 1 | 4 | 0.2466366 | 652 bone morphogenetic protein 4                                                       |
| GO positive regulation of cell death                              | 1 | 4 | 0.2466366 | 652 bone morphogenetic protein 4                                                       |
| GO chloride transmembrane transporter activity                    | 1 | 4 | 0.2466366 | 6521 solute carrier family 4, anion exchanger, member 1 (erythrocyte membrane)         |
| GO urea transport                                                 | 1 | 4 | 0.2466366 | 6563 solute carrier family 14 (urea transporter), member 1 (Kidd blood group)          |
| GO arachidonic acid binding                                       | 1 | 4 | 0.2466366 | 6622 synuclein, alpha (non A4 component of amyloid precursor)                          |
| GO platelet aggregation                                           | 1 | 4 | 0.2466366 | 6812 syntaxin binding protein 1                                                        |
| GO synaptic vesicle maturation                                    | 1 | 4 | 0.2466366 | 6812 syntaxin binding protein 1                                                        |
| GO positive regulation of gamma-delta T cell chemotaxis           | 1 | 4 | 0.2466366 | 6850 spleen tyrosine kinase                                                            |
| GO chromaffin granule membrane                                    | 1 | 4 | 0.2466366 | 6857 synaptotagmin I                                                                   |
| GO progesterone receptor signaling pathway                        | 1 | 4 | 0.2466366 | 687 Kruppel-like factor 9                                                              |
| GO positive regulation of interferon-alpha/beta signaling pathway | 1 | 4 | 0.2466366 | 7098 toll-like receptor 3                                                              |
| GO positive regulation of platelet activation                     | 1 | 4 | 0.2466366 | 7099 toll-like receptor 4                                                              |
| GO muscle thin filament tropomyosin                               | 1 | 4 | 0.2466366 | 7170 tropomyosin 3                                                                     |

|                                            |   |    |           |                                                                             |
|--------------------------------------------|---|----|-----------|-----------------------------------------------------------------------------|
| GO luteinization                           | 1 | 4  | 0.2466366 | 726 calpain 5                                                               |
| GO dendritic spine membrane                | 1 | 4  | 0.2466366 | 729993 shisa homolog 9 (Xenopus laevis)                                     |
| GO gene expression                         | 1 | 4  | 0.2466366 | 7597 zinc finger and BTB domain containing 25                               |
| GO positive regulation of cellular pH red  | 1 | 4  | 0.2466366 | 760 carbonic anhydrase II                                                   |
| GO positive regulation of adenylate cycl   | 1 | 4  | 0.2466366 | 799 calcitonin receptor                                                     |
| GO cellular response to glucose starvatio  | 1 | 4  | 0.2466366 | 81788 NUAK family, SNF1-like kinase, 2                                      |
| GO maintenance of organ identity           | 1 | 4  | 0.2466366 | 84059 G protein-coupled receptor 98                                         |
| GO blood vessel maturation                 | 1 | 4  | 0.2466366 | 8434 reversion-inducing-cysteine-rich protein with kazal motifs             |
| GO peripheral to membrane of membrar       | 1 | 4  | 0.2466366 | 8434 reversion-inducing-cysteine-rich protein with kazal motifs             |
| GO protein phosphatase type 1 complex      | 1 | 4  | 0.2466366 | 84919 protein phosphatase 1, regulatory (inhibitor) subunit 15B             |
| GO [heparan sulfate]-glucosamine N-sulf    | 1 | 4  | 0.2466366 | 8509 N-deacetylase/N-sulfotransferase (heparan glucosaminy) 2               |
| GO actin filament severing                 | 1 | 4  | 0.2466366 | 85477 scinderin                                                             |
| GO cyclic nucleotide metabolic process     | 1 | 4  | 0.2466366 | 8622 phosphodiesterase 8B                                                   |
| GO negative regulation of plasma membr     | 1 | 4  | 0.2466366 | 8660 insulin receptor substrate 2                                           |
| GO positive regulation of glucose metabo   | 1 | 4  | 0.2466366 | 8660 insulin receptor substrate 2                                           |
| GO release of cytoplasmic sequestered N    | 1 | 4  | 0.2466366 | 8740 tumor necrosis factor (ligand) superfamily, member 14                  |
| GO positive regulation of mitochondrial c  | 1 | 4  | 0.2466366 | 885 cholecystokinin                                                         |
| GO cellular response to protein stimulus   | 1 | 4  | 0.2466366 | 8900 cyclin A1                                                              |
| GO vacuolar acidification                  | 1 | 4  | 0.2466366 | 8992 ATPase, H+ transporting, lysosomal 9kDa, V0 subunit e1                 |
| GO sequestering of actin monomers          | 1 | 4  | 0.2466366 | 9087 thymosin beta 4, Y-linked                                              |
| GO phosphatidylinositol-5-phosphate bir    | 1 | 4  | 0.2466366 | 91404 SEC14 and spectrin domains 1                                          |
| GO long term synaptic depression           | 1 | 4  | 0.2466366 | 952 CD38 molecule                                                           |
| GO response to hydroperoxide               | 1 | 4  | 0.2466366 | 952 CD38 molecule                                                           |
| GO thrombospondin receptor activity        | 1 | 4  | 0.2466366 | 961 CD47 molecule                                                           |
| GO intracellular cholesterol transport     | 1 | 4  | 0.2466366 | 9619 ATP-binding cassette, sub-family G (WHITE), member 1                   |
| GO phospholipid transporter activity       | 1 | 4  | 0.2466366 | 9619 ATP-binding cassette, sub-family G (WHITE), member 1                   |
| GO peptidyl-lysine deacetylation           | 1 | 4  | 0.2466366 | 9734 histone deacetylase 9                                                  |
| GO positive regulation of cell migration i | 1 | 4  | 0.2466366 | 9734 histone deacetylase 9                                                  |
| GO clathrin coat                           | 1 | 4  | 0.2466366 | 9892 synaptosomal-associated protein, 91kDa homolog (mouse)                 |
| GO regulation of protein transport         | 1 | 4  | 0.2466366 | 9892 synaptosomal-associated protein, 91kDa homolog (mouse)                 |
| GO lateral element                         | 1 | 4  | 0.2466366 | 9985 REC8 homolog (yeast)                                                   |
| GO temperature homeostasis                 | 2 | 14 | 0.2476336 | 10891 peroxisome proliferator-activated receptor gamma, coactivator 1 alpha |
| GO temperature homeostasis                 | 2 | 14 | 0.2476336 | 1813 dopamine receptor D2                                                   |
| GO glutamine metabolic process             | 2 | 14 | 0.2476336 | 1373 carbamoyl-phosphate synthetase 1, mitochondrial                        |
| GO glutamine metabolic process             | 2 | 14 | 0.2476336 | 27165 glutaminase 2 (liver, mitochondrial)                                  |
| GO endosome to lysosome transport          | 2 | 14 | 0.2476336 | 154 adrenergic, beta-2-, receptor, surface                                  |

|    |                                        |    |     |           |       |                                                                                  |
|----|----------------------------------------|----|-----|-----------|-------|----------------------------------------------------------------------------------|
| GO | endosome to lysosome transport         | 2  | 14  | 0.2476336 | 22906 | trafficking protein, kinesin binding 1                                           |
| GO | behavioral fear response               | 2  | 14  | 0.2476336 | 1815  | dopamine receptor D4                                                             |
| GO | behavioral fear response               | 2  | 14  | 0.2476336 | 885   | cholecystokinin                                                                  |
| GO | nitric oxide mediated signal transduc  | 2  | 14  | 0.2476336 | 183   | angiotensinogen (serpin peptidase inhibitor, clade A, member 8)                  |
| GO | nitric oxide mediated signal transduc  | 2  | 14  | 0.2476336 | 51655 | RAS, dexamethasone-induced 1                                                     |
| GO | response to testosterone stimulus      | 2  | 14  | 0.2476336 | 1843  | dual specificity phosphatase 1                                                   |
| GO | response to testosterone stimulus      | 2  | 14  | 0.2476336 | 3643  | insulin receptor                                                                 |
| GO | protein-chromophore linkage            | 2  | 14  | 0.2476336 | 22795 | nidogen 2 (osteonidogen)                                                         |
| GO | protein-chromophore linkage            | 2  | 14  | 0.2476336 | 83872 | hemicentin 1                                                                     |
| GO | sulfur metabolic process               | 2  | 14  | 0.2476336 | 22901 | arylsulfatase G                                                                  |
| GO | sulfur metabolic process               | 2  | 14  | 0.2476336 | 9435  | carbohydrate (N-acetylglucosamine-6-O) sulfotransferase 2                        |
| GO | embryonic heart tube development       | 2  | 14  | 0.2476336 | 2296  | forkhead box C1                                                                  |
| GO | embryonic heart tube development       | 2  | 14  | 0.2476336 | 2303  | forkhead box C2 (MFH-1, mesenchyme forkhead 1)                                   |
| GO | calmodulin-dependent protein kinase    | 2  | 14  | 0.2476336 | 23604 | death-associated protein kinase 2                                                |
| GO | calmodulin-dependent protein kinase    | 2  | 14  | 0.2476336 | 57118 | calcium/calmodulin-dependent protein kinase ID                                   |
| GO | regulation of action potential in neur | 2  | 14  | 0.2476336 | 27345 | potassium large conductance calcium-activated channel, subfamily M,              |
| GO | regulation of action potential in neur | 2  | 14  | 0.2476336 | 5025  | purinergic receptor P2X, ligand-gated ion channel, 4                             |
| GO | positive regulation of protein catabol | 2  | 14  | 0.2476336 | 29116 | myosin regulatory light chain interacting protein                                |
| GO | positive regulation of protein catabol | 2  | 14  | 0.2476336 | 7474  | wingless-type MMTV integration site family, member 5A                            |
| GO | neuroblast proliferation               | 2  | 14  | 0.2476336 | 3400  | inhibitor of DNA binding 4, dominant negative helix-loop-helix protein           |
| GO | neuroblast proliferation               | 2  | 14  | 0.2476336 | 429   | achaete-scute complex homolog 1 (Drosophila)                                     |
| GO | transmembrane transporter activity     | 2  | 14  | 0.2476336 | 358   | aquaporin 1 (Colton blood group)                                                 |
| GO | transmembrane transporter activity     | 2  | 14  | 0.2476336 | 498   | ATP synthase, H <sup>+</sup> transporting, mitochondrial F1 complex, alpha subun |
| GO | ATP catabolic process                  | 2  | 14  | 0.2476336 | 368   | ATP-binding cassette, sub-family C (CFTR/MRP), member 6                          |
| GO | ATP catabolic process                  | 2  | 14  | 0.2476336 | 498   | ATP synthase, H <sup>+</sup> transporting, mitochondrial F1 complex, alpha subun |
| GO | decidualization                        | 2  | 14  | 0.2476336 | 3726  | jun B proto-oncogene                                                             |
| GO | decidualization                        | 2  | 14  | 0.2476336 | 682   | basigin (Ok blood group)                                                         |
| GO | cell fate specification                | 2  | 14  | 0.2476336 | 4851  | Notch homolog 1, translocation-associated (Drosophila)                           |
| GO | cell fate specification                | 2  | 14  | 0.2476336 | 50937 | Cdon homolog (mouse)                                                             |
| GO | dystrophin-associated glycoprotein c   | 2  | 14  | 0.2476336 | 5239  | phosphoglucomutase 5                                                             |
| GO | dystrophin-associated glycoprotein c   | 2  | 14  | 0.2476336 | 8082  | sarcospan (Kras oncogene-associated gene)                                        |
| GO | pathway-restricted SMAD protein ph     | 2  | 14  | 0.2476336 | 652   | bone morphogenetic protein 4                                                     |
| GO | pathway-restricted SMAD protein ph     | 2  | 14  | 0.2476336 | 7049  | transforming growth factor, beta receptor III                                    |
| GO | single-stranded RNA binding            | 2  | 14  | 0.2476336 | 7538  | zinc finger protein 36, C3H type, homolog (mouse)                                |
| GO | single-stranded RNA binding            | 2  | 14  | 0.2476336 | 9271  | piwi-like 1 (Drosophila)                                                         |
| GO | transcription factor complex           | 12 | 140 | 0.249175  | 10481 | homeobox B13                                                                     |

|                                 |    |     |           |                                                                           |
|---------------------------------|----|-----|-----------|---------------------------------------------------------------------------|
| GO transcription factor complex | 12 | 140 | 0.249175  | 127343 diencephalon/mesencephalon homeobox 1                              |
| GO transcription factor complex | 12 | 140 | 0.249175  | 2033 E1A binding protein p300                                             |
| GO transcription factor complex | 12 | 140 | 0.249175  | 2353 FBJ murine osteosarcoma viral oncogene homolog                       |
| GO transcription factor complex | 12 | 140 | 0.249175  | 3725 jun oncogene                                                         |
| GO transcription factor complex | 12 | 140 | 0.249175  | 4087 SMAD family member 2                                                 |
| GO transcription factor complex | 12 | 140 | 0.249175  | 51085 MLX interacting protein-like                                        |
| GO transcription factor complex | 12 | 140 | 0.249175  | 5308 paired-like homeodomain 2                                            |
| GO transcription factor complex | 12 | 140 | 0.249175  | 5460 POU class 5 homeobox 1                                               |
| GO transcription factor complex | 12 | 140 | 0.249175  | 8543 LIM domain only 4                                                    |
| GO transcription factor complex | 12 | 140 | 0.249175  | 9734 histone deacetylase 9                                                |
| GO transcription factor complex | 12 | 140 | 0.249175  | 9935 v-maf musculoaponeurotic fibrosarcoma oncogene homolog B (avian)     |
| GO fatty acid metabolic process | 7  | 75  | 0.2514152 | 2182 acyl-CoA synthetase long-chain family member 4                       |
| GO fatty acid metabolic process | 7  | 75  | 0.2514152 | 35 acyl-Coenzyme A dehydrogenase, C-2 to C-3 short chain                  |
| GO fatty acid metabolic process | 7  | 75  | 0.2514152 | 51703 acyl-CoA synthetase long-chain family member 5                      |
| GO fatty acid metabolic process | 7  | 75  | 0.2514152 | 5465 peroxisome proliferator-activated receptor alpha                     |
| GO fatty acid metabolic process | 7  | 75  | 0.2514152 | 55268 enoyl Coenzyme A hydratase domain containing 2                      |
| GO fatty acid metabolic process | 7  | 75  | 0.2514152 | 5577 protein kinase, cAMP-dependent, regulatory, type II, beta            |
| GO fatty acid metabolic process | 7  | 75  | 0.2514152 | 6622 synuclein, alpha (non A4 component of amyloid precursor)             |
| GO promoter binding             | 9  | 101 | 0.2528355 | 10014 histone deacetylase 5                                               |
| GO promoter binding             | 9  | 101 | 0.2528355 | 2033 E1A binding protein p300                                             |
| GO promoter binding             | 9  | 101 | 0.2528355 | 222546 regulatory factor X, 6                                             |
| GO promoter binding             | 9  | 101 | 0.2528355 | 2353 FBJ murine osteosarcoma viral oncogene homolog                       |
| GO promoter binding             | 9  | 101 | 0.2528355 | 3169 forkhead box A1                                                      |
| GO promoter binding             | 9  | 101 | 0.2528355 | 3725 jun oncogene                                                         |
| GO promoter binding             | 9  | 101 | 0.2528355 | 4087 SMAD family member 2                                                 |
| GO promoter binding             | 9  | 101 | 0.2528355 | 5460 POU class 5 homeobox 1                                               |
| GO promoter binding             | 9  | 101 | 0.2528355 | 7026 nuclear receptor subfamily 2, group F, member 2                      |
| GO response to oxidative stress | 9  | 101 | 0.2528355 | 10628 thioredoxin interacting protein                                     |
| GO response to oxidative stress | 9  | 101 | 0.2528355 | 1843 dual specificity phosphatase 1                                       |
| GO response to oxidative stress | 9  | 101 | 0.2528355 | 5742 prostaglandin-endoperoxide synthase 1 (prostaglandin G/H synthase a) |
| GO response to oxidative stress | 9  | 101 | 0.2528355 | 7001 peroxiredoxin 2                                                      |
| GO response to oxidative stress | 9  | 101 | 0.2528355 | 7099 toll-like receptor 4                                                 |
| GO response to oxidative stress | 9  | 101 | 0.2528355 | 79661 nei endonuclease VIII-like 1 (E. coli)                              |
| GO response to oxidative stress | 9  | 101 | 0.2528355 | 84919 protein phosphatase 1, regulatory (inhibitor) subunit 15B           |
| GO response to oxidative stress | 9  | 101 | 0.2528355 | 93100 nicotinate phosphoribosyltransferase domain containing 1            |
| GO response to oxidative stress | 9  | 101 | 0.2528355 | 9962 solute carrier family 23 (nucleobase transporters), member 2         |

|                                           |   |    |           |                                                                               |
|-------------------------------------------|---|----|-----------|-------------------------------------------------------------------------------|
| GO chloride transport                     | 5 | 50 | 0.2548929 | 1193 chloride intracellular channel 2                                         |
| GO chloride transport                     | 5 | 50 | 0.2548929 | 53405 chloride intracellular channel 5                                        |
| GO chloride transport                     | 5 | 50 | 0.2548929 | 5349 FXYD domain containing ion transport regulator 3                         |
| GO chloride transport                     | 5 | 50 | 0.2548929 | 6521 solute carrier family 4, anion exchanger, member 1 (erythrocyte memb     |
| GO chloride transport                     | 5 | 50 | 0.2548929 | 8542 apolipoprotein L, 1                                                      |
| GO activation of caspase activity         | 5 | 50 | 0.2548929 | 29108 PYD and CARD domain containing                                          |
| GO activation of caspase activity         | 5 | 50 | 0.2548929 | 3429 interferon, alpha-inducible protein 27                                   |
| GO activation of caspase activity         | 5 | 50 | 0.2548929 | 5371 promyelocytic leukemia                                                   |
| GO activation of caspase activity         | 5 | 50 | 0.2548929 | 885 cholecystokinin                                                           |
| GO activation of caspase activity         | 5 | 50 | 0.2548929 | 9966 tumor necrosis factor (ligand) superfamily, member 15                    |
| GO Golgi cisterna membrane                | 6 | 63 | 0.2598704 | 2525 fucosyltransferase 3 (galactoside 3(4)-L-fucosyltransferase, Lewis blood |
| GO Golgi cisterna membrane                | 6 | 63 | 0.2598704 | 2526 fucosyltransferase 4 (alpha (1,3) fucosyltransferase, myeloid-specific)  |
| GO Golgi cisterna membrane                | 6 | 63 | 0.2598704 | 2589 UDP-N-acetyl-alpha-D-galactosamine:polypeptide N-acetylgalactosami       |
| GO Golgi cisterna membrane                | 6 | 63 | 0.2598704 | 2801 golgin A2                                                                |
| GO Golgi cisterna membrane                | 6 | 63 | 0.2598704 | 64083 golgi phosphoprotein 3 (coat-protein)                                   |
| GO Golgi cisterna membrane                | 6 | 63 | 0.2598704 | 6484 ST3 beta-galactoside alpha-2,3-sialyltransferase 4                       |
| GO positive regulation of gene expression | 4 | 38 | 0.2600294 | 1435 colony stimulating factor 1 (macrophage)                                 |
| GO positive regulation of gene expression | 4 | 38 | 0.2600294 | 2033 E1A binding protein p300                                                 |
| GO positive regulation of gene expression | 4 | 38 | 0.2600294 | 3815 v-kit Hardy-Zuckerman 4 feline sarcoma viral oncogene homolog            |
| GO positive regulation of gene expression | 4 | 38 | 0.2600294 | 652 bone morphogenetic protein 4                                              |
| GO collagen fibril organization           | 3 | 26 | 0.2609152 | 2296 forkhead box C1                                                          |
| GO collagen fibril organization           | 3 | 26 | 0.2609152 | 2303 forkhead box C2 (MFH-1, mesenchyme forkhead 1)                           |
| GO collagen fibril organization           | 3 | 26 | 0.2609152 | 4015 lysyl oxidase                                                            |
| GO GDP binding                            | 3 | 26 | 0.2609152 | 3845 v-Ki-ras2 Kirsten rat sarcoma viral oncogene homolog                     |
| GO GDP binding                            | 3 | 26 | 0.2609152 | 57799 RAB40C, member RAS oncogene family                                      |
| GO GDP binding                            | 3 | 26 | 0.2609152 | 85004 RAS-like, estrogen-regulated, growth inhibitor                          |
| GO NAD+ ADP-ribosyltransferase activity   | 3 | 26 | 0.2609152 | 79668 poly (ADP-ribose) polymerase family, member 8                           |
| GO NAD+ ADP-ribosyltransferase activity   | 3 | 26 | 0.2609152 | 83666 poly (ADP-ribose) polymerase family, member 9                           |
| GO NAD+ ADP-ribosyltransferase activity   | 3 | 26 | 0.2609152 | 84875 poly (ADP-ribose) polymerase family, member 10                          |
| GO hemopoiesis                            | 5 | 51 | 0.2681363 | 1435 colony stimulating factor 1 (macrophage)                                 |
| GO hemopoiesis                            | 5 | 51 | 0.2681363 | 3428 interferon, gamma-inducible protein 16                                   |
| GO hemopoiesis                            | 5 | 51 | 0.2681363 | 3815 v-kit Hardy-Zuckerman 4 feline sarcoma viral oncogene homolog            |
| GO hemopoiesis                            | 5 | 51 | 0.2681363 | 4254 KIT ligand                                                               |
| GO hemopoiesis                            | 5 | 51 | 0.2681363 | 4853 Notch homolog 2 (Drosophila)                                             |
| GO copper ion binding                     | 5 | 51 | 0.2681363 | 2153 coagulation factor V (proaccelerin, labile factor)                       |
| GO copper ion binding                     | 5 | 51 | 0.2681363 | 4015 lysyl oxidase                                                            |

|                                             |   |    |           |                                                                               |
|---------------------------------------------|---|----|-----------|-------------------------------------------------------------------------------|
| GO copper ion binding                       | 5 | 51 | 0.2681363 | 5025 purinergic receptor P2X, ligand-gated ion channel, 4                     |
| GO copper ion binding                       | 5 | 51 | 0.2681363 | 5066 peptidylglycine alpha-amidating monooxygenase                            |
| GO copper ion binding                       | 5 | 51 | 0.2681363 | 84171 lysyl oxidase-like 4                                                    |
| GO forebrain development                    | 5 | 51 | 0.2681363 | 2290 forkhead box G1                                                          |
| GO forebrain development                    | 5 | 51 | 0.2681363 | 4851 Notch homolog 1, translocation-associated (Drosophila)                   |
| GO forebrain development                    | 5 | 51 | 0.2681363 | 7026 nuclear receptor subfamily 2, group F, member 2                          |
| GO forebrain development                    | 5 | 51 | 0.2681363 | 85416 Zic family member 5 (odd-paired homolog, Drosophila)                    |
| GO forebrain development                    | 5 | 51 | 0.2681363 | 8646 chordin                                                                  |
| GO protein complex binding                  | 8 | 90 | 0.2724198 | 1373 carbamoyl-phosphate synthetase 1, mitochondrial                          |
| GO protein complex binding                  | 8 | 90 | 0.2724198 | 1508 cathepsin B                                                              |
| GO protein complex binding                  | 8 | 90 | 0.2724198 | 154 adrenergic, beta-2-, receptor, surface                                    |
| GO protein complex binding                  | 8 | 90 | 0.2724198 | 2033 E1A binding protein p300                                                 |
| GO protein complex binding                  | 8 | 90 | 0.2724198 | 3643 insulin receptor                                                         |
| GO protein complex binding                  | 8 | 90 | 0.2724198 | 3914 laminin, beta 3                                                          |
| GO protein complex binding                  | 8 | 90 | 0.2724198 | 4792 nuclear factor of kappa light polypeptide gene enhancer in B-cells inhib |
| GO protein complex binding                  | 8 | 90 | 0.2724198 | 5122 proprotein convertase subtilisin/kexin type 1                            |
| GO response to nicotine                     | 2 | 15 | 0.273697  | 1139 cholinergic receptor, nicotinic, alpha 7                                 |
| GO response to nicotine                     | 2 | 15 | 0.273697  | 3775 potassium channel, subfamily K, member 1                                 |
| GO voltage-gated chloride channel activi    | 2 | 15 | 0.273697  | 1193 chloride intracellular channel 2                                         |
| GO voltage-gated chloride channel activi    | 2 | 15 | 0.273697  | 53405 chloride intracellular channel 5                                        |
| GO actin filament bundle assembly           | 2 | 15 | 0.273697  | 134549 shroom family member 1                                                 |
| GO actin filament bundle assembly           | 2 | 15 | 0.273697  | 2039 erythrocyte membrane protein band 4.9 (dematin)                          |
| GO embryonic forelimb morphogenesis         | 2 | 15 | 0.273697  | 1382 cellular retinoic acid binding protein 2                                 |
| GO embryonic forelimb morphogenesis         | 2 | 15 | 0.273697  | 157506 retinol dehydrogenase 10 (all-trans)                                   |
| GO phospholipid-translocating ATPase ac     | 2 | 15 | 0.273697  | 148229 ATPase, class I, type 8B, member 3                                     |
| GO phospholipid-translocating ATPase ac     | 2 | 15 | 0.273697  | 79895 ATPase, class I, type 8B, member 4                                      |
| GO positive regulation of catalytic activit | 2 | 15 | 0.273697  | 183 angiotensinogen (serpin peptidase inhibitor, clade A, member 8)           |
| GO positive regulation of catalytic activit | 2 | 15 | 0.273697  | 4929 nuclear receptor subfamily 4, group A, member 2                          |
| GO digestive tract development              | 2 | 15 | 0.273697  | 2033 E1A binding protein p300                                                 |
| GO digestive tract development              | 2 | 15 | 0.273697  | 9971 nuclear receptor subfamily 1, group H, member 4                          |
| GO cellular component organization          | 2 | 15 | 0.273697  | 23500 dishevelled associated activator of morphogenesis 2                     |
| GO cellular component organization          | 2 | 15 | 0.273697  | 85462 FH2 domain containing 1                                                 |
| GO cellular response to extracellular stir  | 2 | 15 | 0.273697  | 2353 FBJ murine osteosarcoma viral oncogene homolog                           |
| GO cellular response to extracellular stir  | 2 | 15 | 0.273697  | 4929 nuclear receptor subfamily 4, group A, member 2                          |
| GO myeloid cell differentiation             | 2 | 15 | 0.273697  | 3428 interferon, gamma-inducible protein 16                                   |
| GO myeloid cell differentiation             | 2 | 15 | 0.273697  | 5371 promyelocytic leukemia                                                   |

|                                           |    |     |          |                                                                                |
|-------------------------------------------|----|-----|----------|--------------------------------------------------------------------------------|
| GO neuromuscular junction developmen      | 2  | 15  | 0.273697 | 375790 agrin                                                                   |
| GO neuromuscular junction developmen      | 2  | 15  | 0.273697 | 783 calcium channel, voltage-dependent, beta 2 subunit                         |
| GO hair follicle development              | 2  | 15  | 0.273697 | 3911 laminin, alpha 5                                                          |
| GO hair follicle development              | 2  | 15  | 0.273697 | 91 activin A receptor, type IB                                                 |
| GO chondrocyte differentiation            | 2  | 15  | 0.273697 | 4209 myocyte enhancer factor 2D                                                |
| GO chondrocyte differentiation            | 2  | 15  | 0.273697 | 7474 wingless-type MMTV integration site family, member 5A                     |
| GO ATPase binding                         | 2  | 15  | 0.273697 | 50617 ATPase, H+ transporting, lysosomal V0 subunit a4                         |
| GO ATPase binding                         | 2  | 15  | 0.273697 | 5774 protein tyrosine phosphatase, non-receptor type 3                         |
| GO oxidoreductase activity, acting on pai | 2  | 15  | 0.273697 | 5351 procollagen-lysine 1, 2-oxoglutarate 5-dioxygenase 1                      |
| GO oxidoreductase activity, acting on pai | 2  | 15  | 0.273697 | 54681 prolyl 4-hydroxylase, transmembrane (endoplasmic reticulum)              |
| GO regulation of protein amino acid pho:  | 2  | 15  | 0.273697 | 5577 protein kinase, cAMP-dependent, regulatory, type II, beta                 |
| GO regulation of protein amino acid pho:  | 2  | 15  | 0.273697 | 9021 suppressor of cytokine signaling 3                                        |
| GO regulation of immune response          | 2  | 15  | 0.273697 | 604 B-cell CLL/lymphoma 6                                                      |
| GO regulation of immune response          | 2  | 15  | 0.273697 | 6850 spleen tyrosine kinase                                                    |
| GO positive regulation of cytokine secret | 2  | 15  | 0.273697 | 834 caspase 1, apoptosis-related cysteine peptidase (interleukin 1, beta, co   |
| GO positive regulation of cytokine secret | 2  | 15  | 0.273697 | 9966 tumor necrosis factor (ligand) superfamily, member 15                     |
| GO epithelial cell differentiation        | 4  | 39  | 0.275491 | 10170 dehydrogenase/reductase (SDR family) member 9                            |
| GO epithelial cell differentiation        | 4  | 39  | 0.275491 | 1755 deleted in malignant brain tumors 1                                       |
| GO epithelial cell differentiation        | 4  | 39  | 0.275491 | 1999 E74-like factor 3 (ets domain transcription factor, epithelial-specific ) |
| GO epithelial cell differentiation        | 4  | 39  | 0.275491 | 3169 forkhead box A1                                                           |
| GO ER-Golgi intermediate compartment      | 4  | 39  | 0.275491 | 2055 ceroid-lipofuscinosis, neuronal 8 (epilepsy, progressive with mental ret  |
| GO ER-Golgi intermediate compartment      | 4  | 39  | 0.275491 | 2706 gap junction protein, beta 2, 26kDa                                       |
| GO ER-Golgi intermediate compartment      | 4  | 39  | 0.275491 | 285704 RGM domain family, member B                                             |
| GO ER-Golgi intermediate compartment      | 4  | 39  | 0.275491 | 4121 mannosidase, alpha, class 1A, member 1                                    |
| GO cytoskeletal protein binding           | 4  | 39  | 0.275491 | 257019 FERM domain containing 3                                                |
| GO cytoskeletal protein binding           | 4  | 39  | 0.275491 | 27295 PDZ and LIM domain 3                                                     |
| GO cytoskeletal protein binding           | 4  | 39  | 0.275491 | 29116 myosin regulatory light chain interacting protein                        |
| GO cytoskeletal protein binding           | 4  | 39  | 0.275491 | 5774 protein tyrosine phosphatase, non-receptor type 3                         |
| GO interspecies interaction between org   | 22 | 280 | 0.278823 | 10346 tripartite motif-containing 22                                           |
| GO interspecies interaction between org   | 22 | 280 | 0.278823 | 1755 deleted in malignant brain tumors 1                                       |
| GO interspecies interaction between org   | 22 | 280 | 0.278823 | 1948 ephrin-B2                                                                 |
| GO interspecies interaction between org   | 22 | 280 | 0.278823 | 2033 E1A binding protein p300                                                  |
| GO interspecies interaction between org   | 22 | 280 | 0.278823 | 23373 CREB regulated transcription coactivator 1                               |
| GO interspecies interaction between org   | 22 | 280 | 0.278823 | 3561 interleukin 2 receptor, gamma (severe combined immunodeficiency)          |
| GO interspecies interaction between org   | 22 | 280 | 0.278823 | 3665 interferon regulatory factor 7                                            |
| GO interspecies interaction between org   | 22 | 280 | 0.278823 | 3678 integrin, alpha 5 (fibronectin receptor, alpha polypeptide)               |

|                                          |    |     |           |                                                                                |
|------------------------------------------|----|-----|-----------|--------------------------------------------------------------------------------|
| GO interspecies interaction between org  | 22 | 280 | 0.278823  | 3949 low density lipoprotein receptor                                          |
| GO interspecies interaction between org  | 22 | 280 | 0.278823  | 4179 CD46 molecule, complement regulatory protein                              |
| GO interspecies interaction between org  | 22 | 280 | 0.278823  | 4792 nuclear factor of kappa light polypeptide gene enhancer in B-cells inhib  |
| GO interspecies interaction between org  | 22 | 280 | 0.278823  | 5295 phosphoinositide-3-kinase, regulatory subunit 1 (alpha)                   |
| GO interspecies interaction between org  | 22 | 280 | 0.278823  | 5371 promyelocytic leukemia                                                    |
| GO interspecies interaction between org  | 22 | 280 | 0.278823  | 5696 proteasome (prosome, macropain) subunit, beta type, 8 (large multifur     |
| GO interspecies interaction between org  | 22 | 280 | 0.278823  | 5698 proteasome (prosome, macropain) subunit, beta type, 9 (large multifur     |
| GO interspecies interaction between org  | 22 | 280 | 0.278823  | 5699 proteasome (prosome, macropain) subunit, beta type, 10                    |
| GO interspecies interaction between org  | 22 | 280 | 0.278823  | 6256 retinoid X receptor, alpha                                                |
| GO interspecies interaction between org  | 22 | 280 | 0.278823  | 64135 interferon induced with helicase C domain 1                              |
| GO interspecies interaction between org  | 22 | 280 | 0.278823  | 6850 spleen tyrosine kinase                                                    |
| GO interspecies interaction between org  | 22 | 280 | 0.278823  | 6921 transcription elongation factor B (SIII), polypeptide 1 (15kDa, elongin C |
| GO interspecies interaction between org  | 22 | 280 | 0.278823  | 7706 tripartite motif-containing 25                                            |
| GO interspecies interaction between org  | 22 | 280 | 0.278823  | 7852 chemokine (C-X-C motif) receptor 4                                        |
| GO ATP synthesis coupled proton transp   | 3  | 27  | 0.2798997 | 10312 T-cell, immune regulator 1, ATPase, H+ transporting, lysosomal V0 subu   |
| GO ATP synthesis coupled proton transp   | 3  | 27  | 0.2798997 | 50617 ATPase, H+ transporting, lysosomal V0 subunit a4                         |
| GO ATP synthesis coupled proton transp   | 3  | 27  | 0.2798997 | 8992 ATPase, H+ transporting, lysosomal 9kDa, V0 subunit e1                    |
| GO enzyme inhibitor activity             | 3  | 27  | 0.2798997 | 10628 thioredoxin interacting protein                                          |
| GO enzyme inhibitor activity             | 3  | 27  | 0.2798997 | 50859 sparc/osteonectin, cwcv and kazal-like domains proteoglycan (testican)   |
| GO enzyme inhibitor activity             | 3  | 27  | 0.2798997 | 7076 TIMP metalloproteinase inhibitor 1                                        |
| GO negative regulation of neuron differe | 3  | 27  | 0.2798997 | 2290 forkhead box G1                                                           |
| GO negative regulation of neuron differe | 3  | 27  | 0.2798997 | 3400 inhibitor of DNA binding 4, dominant negative helix-loop-helix protein    |
| GO negative regulation of neuron differe | 3  | 27  | 0.2798997 | 429 achaete-scute complex homolog 1 (Drosophila)                               |
| GO cell-cell adherens junction           | 3  | 27  | 0.2798997 | 4008 LIM domain 7                                                              |
| GO cell-cell adherens junction           | 3  | 27  | 0.2798997 | 5239 phosphoglucomutase 5                                                      |
| GO cell-cell adherens junction           | 3  | 27  | 0.2798997 | 56288 par-3 partitioning defective 3 homolog (C. elegans)                      |
| GO negative regulation of cell growth    | 8  | 91  | 0.2824202 | 183 angiotensinogen (serpin peptidase inhibitor, clade A, member 8)            |
| GO negative regulation of cell growth    | 8  | 91  | 0.2824202 | 5371 promyelocytic leukemia                                                    |
| GO negative regulation of cell growth    | 8  | 91  | 0.2824202 | 604 B-cell CLL/lymphoma 6                                                      |
| GO negative regulation of cell growth    | 8  | 91  | 0.2824202 | 6494 signal-induced proliferation-associated 1                                 |
| GO negative regulation of cell growth    | 8  | 91  | 0.2824202 | 85004 RAS-like, estrogen-regulated, growth inhibitor                           |
| GO negative regulation of cell growth    | 8  | 91  | 0.2824202 | 91 activin A receptor, type IB                                                 |
| GO negative regulation of cell growth    | 8  | 91  | 0.2824202 | 92304 secretoglobin, family 3A, member 1                                       |
| GO negative regulation of cell growth    | 8  | 91  | 0.2824202 | 94 activin A receptor type II-like 1                                           |
| GO ubiquitin-protein ligase activity     | 12 | 145 | 0.2881057 | 10116 fem-1 homolog b (C. elegans)                                             |
| GO ubiquitin-protein ligase activity     | 12 | 145 | 0.2881057 | 134111 ubiquitin-conjugating enzyme E2Q family-like 1                          |



|    |                                       |    |     |           |                                                                                      |
|----|---------------------------------------|----|-----|-----------|--------------------------------------------------------------------------------------|
| GO | ubiquitin-protein ligase activity     | 12 | 145 | 0.2881057 | 151636 deltex 3-like (Drosophila)                                                    |
| GO | ubiquitin-protein ligase activity     | 12 | 145 | 0.2881057 | 154214 ring finger protein 217                                                       |
| GO | ubiquitin-protein ligase activity     | 12 | 145 | 0.2881057 | 255488 ring finger protein 144B                                                      |
| GO | ubiquitin-protein ligase activity     | 12 | 145 | 0.2881057 | 26232 F-box protein 2                                                                |
| GO | ubiquitin-protein ligase activity     | 12 | 145 | 0.2881057 | 26270 F-box protein 6                                                                |
| GO | ubiquitin-protein ligase activity     | 12 | 145 | 0.2881057 | 29116 myosin regulatory light chain interacting protein                              |
| GO | ubiquitin-protein ligase activity     | 12 | 145 | 0.2881057 | 4008 LIM domain 7                                                                    |
| GO | ubiquitin-protein ligase activity     | 12 | 145 | 0.2881057 | 5071 Parkinson disease (autosomal recessive, juvenile) 2, parkin                     |
| GO | ubiquitin-protein ligase activity     | 12 | 145 | 0.2881057 | 7706 tripartite motif-containing 25                                                  |
| GO | ubiquitin-protein ligase activity     | 12 | 145 | 0.2881057 | 79872 Cas-Br-M (murine) ecotropic retroviral transforming sequence-like 1            |
| GO | dendritic spine                       | 4  | 40  | 0.2910974 | 2911 glutamate receptor, metabotropic 1                                              |
| GO | dendritic spine                       | 4  | 40  | 0.2910974 | 4645 myosin VB                                                                       |
| GO | dendritic spine                       | 4  | 40  | 0.2910974 | 4842 nitric oxide synthase 1 (neuronal)                                              |
| GO | dendritic spine                       | 4  | 40  | 0.2910974 | 5025 purinergic receptor P2X, ligand-gated ion channel, 4                            |
| GO | hormone activity                      | 7  | 79  | 0.2945924 | 1114 chromogranin B (secretogranin 1)                                                |
| GO | hormone activity                      | 7  | 79  | 0.2945924 | 183 angiotensinogen (serpin peptidase inhibitor, clade A, member 8)                  |
| GO | hormone activity                      | 7  | 79  | 0.2945924 | 1906 endothelin 1                                                                    |
| GO | hormone activity                      | 7  | 79  | 0.2945924 | 3479 insulin-like growth factor 1 (somatomedin C)                                    |
| GO | hormone activity                      | 7  | 79  | 0.2945924 | 6343 secretin                                                                        |
| GO | hormone activity                      | 7  | 79  | 0.2945924 | 6750 somatostatin                                                                    |
| GO | hormone activity                      | 7  | 79  | 0.2945924 | 885 cholecystokinin                                                                  |
| GO | response to wounding                  | 5  | 53  | 0.2950409 | 10481 homeobox B13                                                                   |
| GO | response to wounding                  | 5  | 53  | 0.2950409 | 11202 kallikrein-related peptidase 8                                                 |
| GO | response to wounding                  | 5  | 53  | 0.2950409 | 1462 versican                                                                        |
| GO | response to wounding                  | 5  | 53  | 0.2950409 | 1508 cathepsin B                                                                     |
| GO | response to wounding                  | 5  | 53  | 0.2950409 | 5460 POU class 5 homeobox 1                                                          |
| GO | ATP biosynthetic process              | 5  | 53  | 0.2950409 | 148229 ATPase, class I, type 8B, member 3                                            |
| GO | ATP biosynthetic process              | 5  | 53  | 0.2950409 | 493 ATPase, Ca <sup>++</sup> transporting, plasma membrane 4                         |
| GO | ATP biosynthetic process              | 5  | 53  | 0.2950409 | 498 ATP synthase, H <sup>+</sup> transporting, mitochondrial F1 complex, alpha subun |
| GO | ATP biosynthetic process              | 5  | 53  | 0.2950409 | 79895 ATPase, class I, type 8B, member 4                                             |
| GO | ATP biosynthetic process              | 5  | 53  | 0.2950409 | 9914 ATPase, Ca <sup>++</sup> transporting, type 2C, member 2                        |
| GO | negative regulation of myotube differ | 1  | 5   | 0.2981385 | 10014 histone deacetylase 5                                                          |
| GO | mitogen-activated protein kinase kin  | 1  | 5   | 0.2981385 | 10221 tribbles homolog 1 (Drosophila)                                                |
| GO | mRNA modification                     | 1  | 5   | 0.2981385 | 104 adenosine deaminase, RNA-specific, B1 (RED1 homolog rat)                         |
| GO | opioid peptide activity               | 1  | 5   | 0.2981385 | 10435 CDC42 effector protein (Rho GTPase binding) 2                                  |
| GO | positive regulation of protein comple | 1  | 5   | 0.2981385 | 10435 CDC42 effector protein (Rho GTPase binding) 2                                  |

|                                           |   |   |           |                                                                                |
|-------------------------------------------|---|---|-----------|--------------------------------------------------------------------------------|
| GO sodium ion binding                     | 1 | 5 | 0.2981385 | 10568 solute carrier family 34 (sodium phosphate), member 2                    |
| GO sodium-dependent phosphate transp      | 1 | 5 | 0.2981385 | 10568 solute carrier family 34 (sodium phosphate), member 2                    |
| GO transepithelial chloride transport     | 1 | 5 | 0.2981385 | 1080 cystic fibrosis transmembrane conductance regulator (ATP-binding cas      |
| GO respiratory electron transport chain   | 1 | 5 | 0.2981385 | 10891 peroxisome proliferator-activated receptor gamma, coactivator 1 alpha    |
| GO barbed-end actin filament capping      | 1 | 5 | 0.2981385 | 11078 TRIO and F-actin binding protein                                         |
| GO calcium- and calmodulin-responsive a   | 1 | 5 | 0.2981385 | 112 adenylyate cyclase 6                                                       |
| GO interleukin-1-mediated signaling pat   | 1 | 5 | 0.2981385 | 11213 interleukin-1 receptor-associated kinase 3                               |
| GO negative regulation of cytokine-medi   | 1 | 5 | 0.2981385 | 11213 interleukin-1 receptor-associated kinase 3                               |
| GO folic acid transporter activity        | 1 | 5 | 0.2981385 | 113235 solute carrier family 46 (folate transporter), member 1                 |
| GO toxin binding                          | 1 | 5 | 0.2981385 | 1139 cholinergic receptor, nicotinic, alpha 7                                  |
| GO regulation of neuron apoptosis         | 1 | 5 | 0.2981385 | 121665 signal peptide peptidase 3                                              |
| GO ethanol oxidation                      | 1 | 5 | 0.2981385 | 125 alcohol dehydrogenase 1B (class I), beta polypeptide                       |
| GO sphingosine-1-phosphate phosphatas     | 1 | 5 | 0.2981385 | 130367 sphingosine-1-phosphate phosphotase 2                                   |
| GO monocyte activation                    | 1 | 5 | 0.2981385 | 1435 colony stimulating factor 1 (macrophage)                                  |
| GO positive regulation of macrophage di   | 1 | 5 | 0.2981385 | 1435 colony stimulating factor 1 (macrophage)                                  |
| GO positive regulation of heart contracti | 1 | 5 | 0.2981385 | 154 adrenergic, beta-2-, receptor, surface                                     |
| GO positive regulation of potassium ion t | 1 | 5 | 0.2981385 | 154 adrenergic, beta-2-, receptor, surface                                     |
| GO oxidoreductase activity, acting on pai | 1 | 5 | 0.2981385 | 1571 cytochrome P450, family 2, subfamily E, polypeptide 1                     |
| GO embryonic camera-type eye develop      | 1 | 5 | 0.2981385 | 157506 retinol dehydrogenase 10 (all-trans)                                    |
| GO activation of phospholipase C activity | 1 | 5 | 0.2981385 | 1813 dopamine receptor D2                                                      |
| GO circadian regulation of gene expressi  | 1 | 5 | 0.2981385 | 1813 dopamine receptor D2                                                      |
| GO G-protein signaling, coupled to cGMP   | 1 | 5 | 0.2981385 | 183 angiotensinogen (serpin peptidase inhibitor, clade A, member 8)            |
| GO type 1 angiotensin receptor binding    | 1 | 5 | 0.2981385 | 183 angiotensinogen (serpin peptidase inhibitor, clade A, member 8)            |
| GO artery smooth muscle contraction       | 1 | 5 | 0.2981385 | 1906 endothelin 1                                                              |
| GO leukocyte activation                   | 1 | 5 | 0.2981385 | 1906 endothelin 1                                                              |
| GO regulation of systemic arterial blood  | 1 | 5 | 0.2981385 | 1906 endothelin 1                                                              |
| GO mammary gland involution               | 1 | 5 | 0.2981385 | 1999 E74-like factor 3 (ets domain transcription factor, epithelial-specific ) |
| GO transmembrane-ephrin receptor acti     | 1 | 5 | 0.2981385 | 2044 EPH receptor A5                                                           |
| GO musculoskeletal movement               | 1 | 5 | 0.2981385 | 2055 ceroid-lipofuscinosis, neuronal 8 (epilepsy, progressive with mental ret  |
| GO fibroblast growth factor receptor acti | 1 | 5 | 0.2981385 | 2263 fibroblast growth factor receptor 2                                       |
| GO axon midline choice point recognitior  | 1 | 5 | 0.2981385 | 2290 forkhead box G1                                                           |
| GO cell morphogenesis involved in neurc   | 1 | 5 | 0.2981385 | 2290 forkhead box G1                                                           |
| GO glycosaminoglycan metabolic proces     | 1 | 5 | 0.2981385 | 2296 forkhead box C1                                                           |
| GO mesenchymal cell differentiation       | 1 | 5 | 0.2981385 | 2296 forkhead box C1                                                           |
| GO lymphangiogenesis                      | 1 | 5 | 0.2981385 | 2303 forkhead box C2 (MFH-1, mesenchyme forkhead 1)                            |
| GO activation of JNKK activity            | 1 | 5 | 0.2981385 | 23043 TRAF2 and NCK interacting kinase                                         |

|                                            |   |   |           |                                                                             |
|--------------------------------------------|---|---|-----------|-----------------------------------------------------------------------------|
| GO anterograde axon cargo transport        | 1 | 5 | 0.2981385 | 23095 kinesin family member 1B                                              |
| GO response to gravity                     | 1 | 5 | 0.2981385 | 2353 FBJ murine osteosarcoma viral oncogene homolog                         |
| GO lysosomal transport                     | 1 | 5 | 0.2981385 | 255738 proprotein convertase subtilisin/kexin type 9                        |
| GO regulation of receptor activity         | 1 | 5 | 0.2981385 | 255738 proprotein convertase subtilisin/kexin type 9                        |
| GO positive regulation of transferase acti | 1 | 5 | 0.2981385 | 256987 serine incorporator 5                                                |
| GO ER to Golgi transport vesicle membra    | 1 | 5 | 0.2981385 | 25956 SEC31 homolog B (S. cerevisiae)                                       |
| GO AP-1 adaptor complex                    | 1 | 5 | 0.2981385 | 26119 low density lipoprotein receptor adaptor protein 1                    |
| GO SCF-dependent proteasomal ubiquiti      | 1 | 5 | 0.2981385 | 26270 F-box protein 6                                                       |
| GO vitamin D binding                       | 1 | 5 | 0.2981385 | 2638 group-specific component (vitamin D binding protein)                   |
| GO purine base metabolic process           | 1 | 5 | 0.2981385 | 271 adenosine monophosphate deaminase 2                                     |
| GO positive regulation of protein import   | 1 | 5 | 0.2981385 | 2737 GLI family zinc finger 3                                               |
| GO spinal cord dorsal/ventral patterning   | 1 | 5 | 0.2981385 | 2737 GLI family zinc finger 3                                               |
| GO virion binding                          | 1 | 5 | 0.2981385 | 28996 homeodomain interacting protein kinase 2                              |
| GO virus-host interaction                  | 1 | 5 | 0.2981385 | 28996 homeodomain interacting protein kinase 2                              |
| GO peptidyl-citrulline biosynthetic proce  | 1 | 5 | 0.2981385 | 29943 peptidyl arginine deiminase, type I                                   |
| GO protein-arginine deiminase activity     | 1 | 5 | 0.2981385 | 29943 peptidyl arginine deiminase, type I                                   |
| GO azurophil granule                       | 1 | 5 | 0.2981385 | 311 annexin A11                                                             |
| GO S100 alpha binding                      | 1 | 5 | 0.2981385 | 311 annexin A11                                                             |
| GO cell killing                            | 1 | 5 | 0.2981385 | 3192 heterogeneous nuclear ribonucleoprotein U (scaffold attachment facto   |
| GO CRD-mediated mRNA stability complx      | 1 | 5 | 0.2981385 | 3192 heterogeneous nuclear ribonucleoprotein U (scaffold attachment facto   |
| GO CRD-mediated mRNA stabilization         | 1 | 5 | 0.2981385 | 3192 heterogeneous nuclear ribonucleoprotein U (scaffold attachment facto   |
| GO negative regulation of astrocyte diffe  | 1 | 5 | 0.2981385 | 3400 inhibitor of DNA binding 4, dominant negative helix-loop-helix protein |
| GO monocyte differentiation                | 1 | 5 | 0.2981385 | 3428 interferon, gamma-inducible protein 16                                 |
| GO motile secondary cilium                 | 1 | 5 | 0.2981385 | 345895 radial spoke head 4 homolog A (Chlamydomonas)                        |
| GO negative regulation of insulin-like gro | 1 | 5 | 0.2981385 | 3488 insulin-like growth factor binding protein 5                           |
| GO chorio-allantoic fusion                 | 1 | 5 | 0.2981385 | 3491 cysteine-rich, angiogenic inducer, 61                                  |
| GO ciliary neurotrophic factor-mediated    | 1 | 5 | 0.2981385 | 3570 interleukin 6 receptor                                                 |
| GO negative regulation of interleukin-8 p  | 1 | 5 | 0.2981385 | 3570 interleukin 6 receptor                                                 |
| GO negative regulation of protein amino    | 1 | 5 | 0.2981385 | 3725 jun oncogene                                                           |
| GO glycosphingolipid metabolic process     | 1 | 5 | 0.2981385 | 3815 v-kit Hardy-Zuckerman 4 feline sarcoma viral oncogene homolog          |
| GO regulation of developmental pigment     | 1 | 5 | 0.2981385 | 3815 v-kit Hardy-Zuckerman 4 feline sarcoma viral oncogene homolog          |
| GO lipoprotein catabolic process           | 1 | 5 | 0.2981385 | 3949 low density lipoprotein receptor                                       |
| GO low-density lipoprotein particle clear  | 1 | 5 | 0.2981385 | 3949 low density lipoprotein receptor                                       |
| GO positive regulation of GTPase activity  | 1 | 5 | 0.2981385 | 395 Rho GTPase activating protein 6                                         |
| GO pericardium development                 | 1 | 5 | 0.2981385 | 4087 SMAD family member 2                                                   |
| GO primary microRNA processing             | 1 | 5 | 0.2981385 | 4087 SMAD family member 2                                                   |

|    |                                         |   |   |           |                                                                               |
|----|-----------------------------------------|---|---|-----------|-------------------------------------------------------------------------------|
| GO | regulation of binding                   | 1 | 5 | 0.2981385 | 4087 SMAD family member 2                                                     |
| GO | transforming growth factor beta rece    | 1 | 5 | 0.2981385 | 4087 SMAD family member 2                                                     |
| GO | steroid catabolic process               | 1 | 5 | 0.2981385 | 412 steroid sulfatase (microsomal), isozyme S                                 |
| GO | sulfuric ester hydrolase activity       | 1 | 5 | 0.2981385 | 412 steroid sulfatase (microsomal), isozyme S                                 |
| GO | regulation of osteoclast differentiat   | 1 | 5 | 0.2981385 | 4286 microphthalmia-associated transcription factor                           |
| GO | E-box binding                           | 1 | 5 | 0.2981385 | 429 achaete-scute complex homolog 1 (Drosophila)                              |
| GO | spinal cord association neuron differ   | 1 | 5 | 0.2981385 | 429 achaete-scute complex homolog 1 (Drosophila)                              |
| GO | nerve growth factor receptor signalin   | 1 | 5 | 0.2981385 | 4692 necdin homolog (mouse)                                                   |
| GO | germinal center formation               | 1 | 5 | 0.2981385 | 4791 nuclear factor of kappa light polypeptide gene enhancer in B-cells 2 (p4 |
| GO | negative regulation of Notch signalin   | 1 | 5 | 0.2981385 | 4792 nuclear factor of kappa light polypeptide gene enhancer in B-cells inhib |
| GO | sprouting angiogenesis                  | 1 | 5 | 0.2981385 | 4851 Notch homolog 1, translocation-associated (Drosophila)                   |
| GO | reduction of cytosolic calcium ion cor  | 1 | 5 | 0.2981385 | 4886 neuropeptide Y receptor Y1                                               |
| GO | negative regulation of cardiac muscle   | 1 | 5 | 0.2981385 | 5025 purinergic receptor P2X, ligand-gated ion channel, 4                     |
| GO | positive regulation of prostaglandin s  | 1 | 5 | 0.2981385 | 5025 purinergic receptor P2X, ligand-gated ion channel, 4                     |
| GO | nerve growth factor binding             | 1 | 5 | 0.2981385 | 5046 proprotein convertase subtilisin/kexin type 6                            |
| GO | peptide metabolic process               | 1 | 5 | 0.2981385 | 5066 peptidylglycine alpha-amidating monooxygenase                            |
| GO | negative regulation of cell cycle arres | 1 | 5 | 0.2981385 | 51085 MLX interacting protein-like                                            |
| GO | glycolipid binding                      | 1 | 5 | 0.2981385 | 51228 glycolipid transfer protein                                             |
| GO | glycolipid transporter activity         | 1 | 5 | 0.2981385 | 51228 glycolipid transfer protein                                             |
| GO | positive regulation of triglyceride bio | 1 | 5 | 0.2981385 | 51703 acyl-CoA synthetase long-chain family member 5                          |
| GO | positive regulation of establishment (  | 1 | 5 | 0.2981385 | 5295 phosphoinositide-3-kinase, regulatory subunit 1 (alpha)                  |
| GO | regulation of cytokine production       | 1 | 5 | 0.2981385 | 53347 ubiquitin associated and SH3 domain containing, A                       |
| GO | positive regulation of defense respon   | 1 | 5 | 0.2981385 | 5371 promyelocytic leukemia                                                   |
| GO | microvillus assembly                    | 1 | 5 | 0.2981385 | 53827 FXYD domain containing ion transport regulator 5                        |
| GO | positive regulation of smoothed sig     | 1 | 5 | 0.2981385 | 5396 paired related homeobox 1                                                |
| GO | oocyte development                      | 1 | 5 | 0.2981385 | 54361 wingless-type MMTV integration site family, member 4                    |
| GO | serine-type carboxypeptidase activity   | 1 | 5 | 0.2981385 | 54504 carboxypeptidase, vitellogenic-like                                     |
| GO | DNA-directed RNA polymerase II, hol     | 1 | 5 | 0.2981385 | 55140 elongation protein 3 homolog ( <i>S. cerevisiae</i> )                   |
| GO | cellular amino acid and derivative me   | 1 | 5 | 0.2981385 | 55432 YOD1 OTU deubiquinating enzyme 1 homolog ( <i>S. cerevisiae</i> )       |
| GO | regulation of T cell activation         | 1 | 5 | 0.2981385 | 55824 phosphoprotein associated with glycosphingolipid microdomains 1         |
| GO | sodium-independent organic anion tr     | 1 | 5 | 0.2981385 | 55867 solute carrier family 22 (organic anion/urate transporter), member 11   |
| GO | regulation of bone mineralization       | 1 | 5 | 0.2981385 | 56172 ankylosis, progressive homolog (mouse)                                  |
| GO | positive regulation of triglyceride cat | 1 | 5 | 0.2981385 | 57104 patatin-like phospholipase domain containing 2                          |
| GO | melanosome localization                 | 1 | 5 | 0.2981385 | 5873 RAB27A, member RAS oncogene family                                       |
| GO | ammonium transmembrane transpor         | 1 | 5 | 0.2981385 | 6006 Rh blood group, CcEe antigens                                            |
| GO | negative regulation of Rho protein sig  | 1 | 5 | 0.2981385 | 604 B-cell CLL/lymphoma 6                                                     |

|    |                                        |   |   |           |        |                                                                          |
|----|----------------------------------------|---|---|-----------|--------|--------------------------------------------------------------------------|
| GO | glutamate secretion                    | 1 | 5 | 0.2981385 | 627    | brain-derived neurotrophic factor                                        |
| GO | negative regulation of neuroblast prc  | 1 | 5 | 0.2981385 | 627    | brain-derived neurotrophic factor                                        |
| GO | neuron recognition                     | 1 | 5 | 0.2981385 | 627    | brain-derived neurotrophic factor                                        |
| GO | detection of chemical stimulus involv  | 1 | 5 | 0.2981385 | 64108  | receptor (chemosensory) transporter protein 4                            |
| GO | thioredoxin-disulfide reductase activi | 1 | 5 | 0.2981385 | 64359  | nucleoredoxin                                                            |
| GO | BMP receptor binding                   | 1 | 5 | 0.2981385 | 652    | bone morphogenetic protein 4                                             |
| GO | mesenchymal to epithelial transition   | 1 | 5 | 0.2981385 | 652    | bone morphogenetic protein 4                                             |
| GO | negative regulation of chondrocyte d   | 1 | 5 | 0.2981385 | 652    | bone morphogenetic protein 4                                             |
| GO | negative regulation of oligodendrocy   | 1 | 5 | 0.2981385 | 652    | bone morphogenetic protein 4                                             |
| GO | positive regulation of branching invol | 1 | 5 | 0.2981385 | 652    | bone morphogenetic protein 4                                             |
| GO | regulation of smooth muscle cell diff  | 1 | 5 | 0.2981385 | 652    | bone morphogenetic protein 4                                             |
| GO | tongue morphogenesis                   | 1 | 5 | 0.2981385 | 652    | bone morphogenetic protein 4                                             |
| GO | anion exchanger activity               | 1 | 5 | 0.2981385 | 6521   | solute carrier family 4, anion exchanger, member 1 (erythrocyte memb     |
| GO | cellular ion homeostasis               | 1 | 5 | 0.2981385 | 6521   | solute carrier family 4, anion exchanger, member 1 (erythrocyte memb     |
| GO | oligopeptide transport                 | 1 | 5 | 0.2981385 | 6564   | solute carrier family 15 (oligopeptide transporter), member 1            |
| GO | drug transport                         | 1 | 5 | 0.2981385 | 6565   | solute carrier family 15 (H+/peptide transporter), member 2              |
| GO | long-term synaptic potentiation        | 1 | 5 | 0.2981385 | 6622   | synuclein, alpha (non A4 component of amyloid precursor)                 |
| GO | positive regulation of receptor recycl | 1 | 5 | 0.2981385 | 6622   | synuclein, alpha (non A4 component of amyloid precursor)                 |
| GO | regulation of locomotion               | 1 | 5 | 0.2981385 | 6622   | synuclein, alpha (non A4 component of amyloid precursor)                 |
| GO | regulation of macrophage activation    | 1 | 5 | 0.2981385 | 6622   | synuclein, alpha (non A4 component of amyloid precursor)                 |
| GO | tau protein binding                    | 1 | 5 | 0.2981385 | 6622   | synuclein, alpha (non A4 component of amyloid precursor)                 |
| GO | spectrin-associated cytoskeleton       | 1 | 5 | 0.2981385 | 6710   | spectrin, beta, erythrocytic                                             |
| GO | induction of apoptosis by hormones     | 1 | 5 | 0.2981385 | 6750   | somatostatin                                                             |
| GO | somatostatin receptor activity         | 1 | 5 | 0.2981385 | 6751   | somatostatin receptor 1                                                  |
| GO | definitive hemopoiesis                 | 1 | 5 | 0.2981385 | 7049   | transforming growth factor, beta receptor III                            |
| GO | negative regulation of cellular compc  | 1 | 5 | 0.2981385 | 7049   | transforming growth factor, beta receptor III                            |
| GO | response to prostaglandin E stimulus   | 1 | 5 | 0.2981385 | 7049   | transforming growth factor, beta receptor III                            |
| GO | toll-like receptor signaling pathway   | 1 | 5 | 0.2981385 | 7099   | toll-like receptor 4                                                     |
| GO | regulation of short-term neuronal syr  | 1 | 5 | 0.2981385 | 729993 | shisa homolog 9 (Xenopus laevis)                                         |
| GO | mammary gland branching involved i     | 1 | 5 | 0.2981385 | 7474   | wingless-type MMTV integration site family, member 5A                    |
| GO | 1-alkyl-2-acetyl-glycerophosphocholin  | 1 | 5 | 0.2981385 | 7941   | phospholipase A2, group VII (platelet-activating factor acetylhydrolase, |
| GO | intramembranous ossification           | 1 | 5 | 0.2981385 | 8313   | axin 2                                                                   |
| GO | phosphatidylinositol transporter acti  | 1 | 5 | 0.2981385 | 83394  | PITPNM family member 3                                                   |
| GO | endoderm formation                     | 1 | 5 | 0.2981385 | 83595  | SRY (sex determining region Y)-box 7                                     |
| GO | muscle organ morphogenesis             | 1 | 5 | 0.2981385 | 84159  | AT rich interactive domain 5B (MRF1-like)                                |
| GO | negative regulation of kinase activity | 1 | 5 | 0.2981385 | 8660   | insulin receptor substrate 2                                             |

|    |                                                             |   |    |           |        |                                                                        |
|----|-------------------------------------------------------------|---|----|-----------|--------|------------------------------------------------------------------------|
| GO | regulation of calcium ion transport via                     | 1 | 5  | 0.2981385 | 91404  | SEC14 and spectrin domains 1                                           |
| GO | secondary active monocarboxylate transporter                | 1 | 5  | 0.2981385 | 9194   | solute carrier family 16, member 7 (monocarboxylic acid transporter 2) |
| GO | peptidoglycan receptor activity                             | 1 | 5  | 0.2981385 | 929    | CD14 molecule                                                          |
| GO | N-acetylglucosamine 6-O-sulfotransferase                    | 1 | 5  | 0.2981385 | 9435   | carbohydrate (N-acetylglucosamine-6-O) sulfotransferase 2              |
| GO | cellular metal ion homeostasis                              | 1 | 5  | 0.2981385 | 9633   | metallothionein-like 5, testis-specific (tesmin)                       |
| GO | nitric-oxide synthase binding                               | 1 | 5  | 0.2981385 | 9722   | nitric oxide synthase 1 (neuronal) adaptor protein                     |
| GO | segment specification                                       | 1 | 5  | 0.2981385 | 9935   | v-maf musculoaponeurotic fibrosarcoma oncogene homolog B (avian)       |
| GO | synapsis                                                    | 1 | 5  | 0.2981385 | 9985   | REC8 homolog (yeast)                                                   |
| GO | camera-type eye development                                 | 3 | 28 | 0.2990029 | 2296   | forkhead box C1                                                        |
| GO | camera-type eye development                                 | 3 | 28 | 0.2990029 | 2303   | forkhead box C2 (MFH-1, mesenchyme forkhead 1)                         |
| GO | camera-type eye development                                 | 3 | 28 | 0.2990029 | 4286   | microphthalmia-associated transcription factor                         |
| GO | single fertilization                                        | 3 | 28 | 0.2990029 | 4179   | CD46 molecule, complement regulatory protein                           |
| GO | single fertilization                                        | 3 | 28 | 0.2990029 | 4486   | macrophage stimulating 1 receptor (c-met-related tyrosine kinase)      |
| GO | single fertilization                                        | 3 | 28 | 0.2990029 | 5016   | oviductal glycoprotein 1, 120kDa                                       |
| GO | positive regulation of axonogenesis                         | 2 | 16 | 0.2997149 | 10507  | sema domain, immunoglobulin domain (Ig), transmembrane domain (TM)     |
| GO | positive regulation of axonogenesis                         | 2 | 16 | 0.2997149 | 23654  | plexin B2                                                              |
| GO | vitamin D receptor binding                                  | 2 | 16 | 0.2997149 | 10766  | transducer of ERBB2, 2                                                 |
| GO | vitamin D receptor binding                                  | 2 | 16 | 0.2997149 | 6256   | retinoid X receptor, alpha                                             |
| GO | nicotinic acetylcholine-activated cation channel activity   | 2 | 16 | 0.2997149 | 1139   | cholinergic receptor, nicotinic, alpha 7                               |
| GO | nicotinic acetylcholine-activated cation channel activity   | 2 | 16 | 0.2997149 | 8973   | cholinergic receptor, nicotinic, alpha 6                               |
| GO | nicotinic acetylcholine-gated receptor activity             | 2 | 16 | 0.2997149 | 1139   | cholinergic receptor, nicotinic, alpha 7                               |
| GO | nicotinic acetylcholine-gated receptor activity             | 2 | 16 | 0.2997149 | 8973   | cholinergic receptor, nicotinic, alpha 6                               |
| GO | phosphatidylinositol-3,4,5-trisphosphatase                  | 2 | 16 | 0.2997149 | 116984 | ArfGAP with RhoGAP domain, ankyrin repeat and PH domain 2              |
| GO | phosphatidylinositol-3,4,5-trisphosphatase                  | 2 | 16 | 0.2997149 | 56288  | par-3 partitioning defective 3 homolog (C. elegans)                    |
| GO | negative regulation of insulin secretory granule biogenesis | 2 | 16 | 0.2997149 | 130399 | activin A receptor, type IC                                            |
| GO | negative regulation of insulin secretory granule biogenesis | 2 | 16 | 0.2997149 | 8622   | phosphodiesterase 8B                                                   |
| GO | receptor complex                                            | 2 | 16 | 0.2997149 | 1435   | colony stimulating factor 1 (macrophage)                               |
| GO | receptor complex                                            | 2 | 16 | 0.2997149 | 154    | adrenergic, beta-2-, receptor, surface                                 |
| GO | gamete generation                                           | 2 | 16 | 0.2997149 | 158800 | Rhox homeobox family, member 1                                         |
| GO | gamete generation                                           | 2 | 16 | 0.2997149 | 54361  | wingless-type MMTV integration site family, member 4                   |
| GO | response to morphine                                        | 2 | 16 | 0.2997149 | 1813   | dopamine receptor D2                                                   |
| GO | response to morphine                                        | 2 | 16 | 0.2997149 | 5122   | proprotein convertase subtilisin/kexin type 1                          |
| GO | lateral plasma membrane                                     | 2 | 16 | 0.2997149 | 2706   | gap junction protein, beta 2, 26kDa                                    |
| GO | lateral plasma membrane                                     | 2 | 16 | 0.2997149 | 368    | ATP-binding cassette, sub-family C (CFTR/MRP), member 6                |
| GO | smoothened signaling pathway                                | 2 | 16 | 0.2997149 | 28996  | homeodomain interacting protein kinase 2                               |
| GO | smoothened signaling pathway                                | 2 | 16 | 0.2997149 | 50937  | Cdon homolog (mouse)                                                   |

|                                        |   |     |           |                                                                                          |
|----------------------------------------|---|-----|-----------|------------------------------------------------------------------------------------------|
| GO response to nutrient levels         | 2 | 16  | 0.2997149 | 3643 insulin receptor                                                                    |
| GO response to nutrient levels         | 2 | 16  | 0.2997149 | 5122 proprotein convertase subtilisin/kexin type 1                                       |
| GO internal side of plasma membrane    | 2 | 16  | 0.2997149 | 3815 v-kit Hardy-Zuckerman 4 feline sarcoma viral oncogene homolog                       |
| GO internal side of plasma membrane    | 2 | 16  | 0.2997149 | 5239 phosphoglucomutase 5                                                                |
| GO calcium-dependent cysteine-type enc | 2 | 16  | 0.2997149 | 388743 calpain 8                                                                         |
| GO calcium-dependent cysteine-type enc | 2 | 16  | 0.2997149 | 726 calpain 5                                                                            |
| GO response to axon injury             | 2 | 16  | 0.2997149 | 4056 leukotriene C4 synthase                                                             |
| GO response to axon injury             | 2 | 16  | 0.2997149 | 5122 proprotein convertase subtilisin/kexin type 1                                       |
| GO mitochondrial envelope              | 2 | 16  | 0.2997149 | 4129 monoamine oxidase B                                                                 |
| GO mitochondrial envelope              | 2 | 16  | 0.2997149 | 9804 translocase of outer mitochondrial membrane 20 homolog (yeast)                      |
| GO eukaryotic cell surface binding     | 2 | 16  | 0.2997149 | 498 ATP synthase, H <sup>+</sup> transporting, mitochondrial F1 complex, alpha subun     |
| GO eukaryotic cell surface binding     | 2 | 16  | 0.2997149 | 5046 proprotein convertase subtilisin/kexin type 6                                       |
| GO stereocilium                        | 2 | 16  | 0.2997149 | 51168 myosin XVA                                                                         |
| GO stereocilium                        | 2 | 16  | 0.2997149 | 53405 chloride intracellular channel 5                                                   |
| GO mRNA binding                        | 4 | 41  | 0.3068172 | 104 adenosine deaminase, RNA-specific, B1 (RED1 homolog rat)                             |
| GO mRNA binding                        | 4 | 41  | 0.3068172 | 55124 piwi-like 2 (Drosophila)                                                           |
| GO mRNA binding                        | 4 | 41  | 0.3068172 | 7538 zinc finger protein 36, C3H type, homolog (mouse)                                   |
| GO mRNA binding                        | 4 | 41  | 0.3068172 | 9271 piwi-like 1 (Drosophila)                                                            |
| GO cellular defense response           | 5 | 54  | 0.3086611 | 10288 leukocyte immunoglobulin-like receptor, subfamily B (with TM and ITIM              |
| GO cellular defense response           | 5 | 54  | 0.3086611 | 10312 T-cell, immune regulator 1, ATPase, H <sup>+</sup> transporting, lysosomal V0 subu |
| GO cellular defense response           | 5 | 54  | 0.3086611 | 3823 killer cell lectin-like receptor subfamily C, member 3                              |
| GO cellular defense response           | 5 | 54  | 0.3086611 | 3959 lectin, galactoside-binding, soluble, 3 binding protein                             |
| GO cellular defense response           | 5 | 54  | 0.3086611 | 9214 Fas apoptotic inhibitory molecule 3                                                 |
| GO proton transport                    | 5 | 54  | 0.3086611 | 10312 T-cell, immune regulator 1, ATPase, H <sup>+</sup> transporting, lysosomal V0 subu |
| GO proton transport                    | 5 | 54  | 0.3086611 | 27035 NADPH oxidase 1                                                                    |
| GO proton transport                    | 5 | 54  | 0.3086611 | 498 ATP synthase, H <sup>+</sup> transporting, mitochondrial F1 complex, alpha subun     |
| GO proton transport                    | 5 | 54  | 0.3086611 | 50617 ATPase, H <sup>+</sup> transporting, lysosomal V0 subunit a4                       |
| GO proton transport                    | 5 | 54  | 0.3086611 | 8992 ATPase, H <sup>+</sup> transporting, lysosomal 9kDa, V0 subunit e1                  |
| GO basolateral plasma membrane         | 9 | 107 | 0.3088619 | 1048 carcinoembryonic antigen-related cell adhesion molecule 5                           |
| GO basolateral plasma membrane         | 9 | 107 | 0.3088619 | 1080 cystic fibrosis transmembrane conductance regulator (ATP-binding cas:               |
| GO basolateral plasma membrane         | 9 | 107 | 0.3088619 | 2066 v-erb-a erythroblastic leukemia viral oncogene homolog 4 (avian)                    |
| GO basolateral plasma membrane         | 9 | 107 | 0.3088619 | 3570 interleukin 6 receptor                                                              |
| GO basolateral plasma membrane         | 9 | 107 | 0.3088619 | 358 aquaporin 1 (Colton blood group)                                                     |
| GO basolateral plasma membrane         | 9 | 107 | 0.3088619 | 6521 solute carrier family 4, anion exchanger, member 1 (erythrocyte memb                |
| GO basolateral plasma membrane         | 9 | 107 | 0.3088619 | 760 carbonic anhydrase II                                                                |
| GO basolateral plasma membrane         | 9 | 107 | 0.3088619 | 8671 solute carrier family 4, sodium bicarbonate cotransporter, member 4                 |

|                                |    |     |           |                                                                       |
|--------------------------------|----|-----|-----------|-----------------------------------------------------------------------|
| GO basolateral plasma membrane | 9  | 107 | 0.3088619 | 9962 solute carrier family 23 (nucleobase transporters), member 2     |
| GO actin cytoskeleton          | 11 | 134 | 0.3088761 | 11078 TRIO and F-actin binding protein                                |
| GO actin cytoskeleton          | 11 | 134 | 0.3088761 | 1612 death-associated protein kinase 1                                |
| GO actin cytoskeleton          | 11 | 134 | 0.3088761 | 2039 erythrocyte membrane protein band 4.9 (dematin)                  |
| GO actin cytoskeleton          | 11 | 134 | 0.3088761 | 27295 PDZ and LIM domain 3                                            |
| GO actin cytoskeleton          | 11 | 134 | 0.3088761 | 395 Rho GTPase activating protein 6                                   |
| GO actin cytoskeleton          | 11 | 134 | 0.3088761 | 3983 actin binding LIM protein 1                                      |
| GO actin cytoskeleton          | 11 | 134 | 0.3088761 | 4778 nuclear factor (erythroid-derived 2), 45kDa                      |
| GO actin cytoskeleton          | 11 | 134 | 0.3088761 | 53405 chloride intracellular channel 5                                |
| GO actin cytoskeleton          | 11 | 134 | 0.3088761 | 6622 synuclein, alpha (non A4 component of amyloid precursor)         |
| GO actin cytoskeleton          | 11 | 134 | 0.3088761 | 6710 spectrin, beta, erythrocytic                                     |
| GO actin cytoskeleton          | 11 | 134 | 0.3088761 | 9788 metastasis suppressor 1                                          |
| GO cell proliferation          | 22 | 286 | 0.3132056 | 10216 proteoglycan 4                                                  |
| GO cell proliferation          | 22 | 286 | 0.3132056 | 1435 colony stimulating factor 1 (macrophage)                         |
| GO cell proliferation          | 22 | 286 | 0.3132056 | 2013 epithelial membrane protein 2                                    |
| GO cell proliferation          | 22 | 286 | 0.3132056 | 2066 v-erb-a erythroblastic leukemia viral oncogene homolog 4 (avian) |
| GO cell proliferation          | 22 | 286 | 0.3132056 | 2239 glypican 4                                                       |
| GO cell proliferation          | 22 | 286 | 0.3132056 | 2303 forkhead box C2 (MFH-1, mesenchyme forkhead 1)                   |
| GO cell proliferation          | 22 | 286 | 0.3132056 | 2752 glutamate-ammonia ligase (glutamine synthetase)                  |
| GO cell proliferation          | 22 | 286 | 0.3132056 | 29126 CD274 molecule                                                  |
| GO cell proliferation          | 22 | 286 | 0.3132056 | 3428 interferon, gamma-inducible protein 16                           |
| GO cell proliferation          | 22 | 286 | 0.3132056 | 3491 cysteine-rich, angiogenic inducer, 61                            |
| GO cell proliferation          | 22 | 286 | 0.3132056 | 3601 interleukin 15 receptor, alpha                                   |
| GO cell proliferation          | 22 | 286 | 0.3132056 | 3911 laminin, alpha 5                                                 |
| GO cell proliferation          | 22 | 286 | 0.3132056 | 4194 Mdm4 p53 binding protein homolog (mouse)                         |
| GO cell proliferation          | 22 | 286 | 0.3132056 | 4254 KIT ligand                                                       |
| GO cell proliferation          | 22 | 286 | 0.3132056 | 64083 golgi phosphoprotein 3 (coat-protein)                           |
| GO cell proliferation          | 22 | 286 | 0.3132056 | 6494 signal-induced proliferation-associated 1                        |
| GO cell proliferation          | 22 | 286 | 0.3132056 | 684 bone marrow stromal cell antigen 2                                |
| GO cell proliferation          | 22 | 286 | 0.3132056 | 6850 spleen tyrosine kinase                                           |
| GO cell proliferation          | 22 | 286 | 0.3132056 | 6941 transcription factor 19                                          |
| GO cell proliferation          | 22 | 286 | 0.3132056 | 7071 Kruppel-like factor 10                                           |
| GO cell proliferation          | 22 | 286 | 0.3132056 | 8556 CDC14 cell division cycle 14 homolog A (S. cerevisiae)           |
| GO cell proliferation          | 22 | 286 | 0.3132056 | 8744 tumor necrosis factor (ligand) superfamily, member 9             |
| GO histone deacetylase complex | 3  | 29  | 0.3181706 | 10014 histone deacetylase 5                                           |
| GO histone deacetylase complex | 3  | 29  | 0.3181706 | 2122 MDS1 and EVI1 complex locus                                      |



|                                            |   |    |           |                                                                                  |
|--------------------------------------------|---|----|-----------|----------------------------------------------------------------------------------|
| GO histone deacetylase complex             | 3 | 29 | 0.3181706 | 9734 histone deacetylase 9                                                       |
| GO protein kinase C binding                | 3 | 29 | 0.3181706 | 10014 histone deacetylase 5                                                      |
| GO protein kinase C binding                | 3 | 29 | 0.3181706 | 112464 protein kinase C, delta binding protein                                   |
| GO protein kinase C binding                | 3 | 29 | 0.3181706 | 9734 histone deacetylase 9                                                       |
| GO keratinocyte differentiation            | 3 | 29 | 0.3181706 | 10628 thioredoxin interacting protein                                            |
| GO keratinocyte differentiation            | 3 | 29 | 0.3181706 | 6706 small proline-rich protein 2G                                               |
| GO keratinocyte differentiation            | 3 | 29 | 0.3181706 | 8796 sciellin                                                                    |
| GO transcriptional repressor complex       | 3 | 29 | 0.3181706 | 2117 ets variant 3                                                               |
| GO transcriptional repressor complex       | 3 | 29 | 0.3181706 | 2737 GLI family zinc finger 3                                                    |
| GO transcriptional repressor complex       | 3 | 29 | 0.3181706 | 7464 coronin, actin binding protein, 2A                                          |
| GO behavior                                | 3 | 29 | 0.3181706 | 2354 FBJ murine osteosarcoma viral oncogene homolog B                            |
| GO behavior                                | 3 | 29 | 0.3181706 | 4128 monoamine oxidase A                                                         |
| GO behavior                                | 3 | 29 | 0.3181706 | 5367 pro-melanin-concentrating hormone                                           |
| GO protein homooligomerization             | 6 | 68 | 0.3200702 | 2040 stomatin                                                                    |
| GO protein homooligomerization             | 6 | 68 | 0.3200702 | 5025 purinergic receptor P2X, ligand-gated ion channel, 4                        |
| GO protein homooligomerization             | 6 | 68 | 0.3200702 | 6505 solute carrier family 1 (neuronal/epithelial high affinity glutamate transp |
| GO protein homooligomerization             | 6 | 68 | 0.3200702 | 6857 synaptotagmin I                                                             |
| GO protein homooligomerization             | 6 | 68 | 0.3200702 | 8527 diacylglycerol kinase, delta 130kDa                                         |
| GO protein homooligomerization             | 6 | 68 | 0.3200702 | 8600 tumor necrosis factor (ligand) superfamily, member 11                       |
| GO post-embryonic development              | 5 | 55 | 0.3223666 | 4087 SMAD family member 2                                                        |
| GO post-embryonic development              | 5 | 55 | 0.3223666 | 4929 nuclear receptor subfamily 4, group A, member 2                             |
| GO post-embryonic development              | 5 | 55 | 0.3223666 | 64651 cysteine-serine-rich nuclear protein 1                                     |
| GO post-embryonic development              | 5 | 55 | 0.3223666 | 652 bone morphogenetic protein 4                                                 |
| GO post-embryonic development              | 5 | 55 | 0.3223666 | 84159 AT rich interactive domain 5B (MRF1-like)                                  |
| GO chemokine activity                      | 4 | 42 | 0.3226198 | 2921 chemokine (C-X-C motif) ligand 3                                            |
| GO chemokine activity                      | 4 | 42 | 0.3226198 | 56477 chemokine (C-C motif) ligand 28                                            |
| GO chemokine activity                      | 4 | 42 | 0.3226198 | 6372 chemokine (C-X-C motif) ligand 6 (granulocyte chemotactic protein 2)        |
| GO chemokine activity                      | 4 | 42 | 0.3226198 | 6374 chemokine (C-X-C motif) ligand 5                                            |
| GO histone deacetylation                   | 2 | 17 | 0.3255718 | 10014 histone deacetylase 5                                                      |
| GO histone deacetylation                   | 2 | 17 | 0.3255718 | 9734 histone deacetylase 9                                                       |
| GO positive regulation of cell-substrate a | 2 | 17 | 0.3255718 | 10085 EGF-like repeats and discoidin I-like domains 3                            |
| GO positive regulation of cell-substrate a | 2 | 17 | 0.3255718 | 3491 cysteine-rich, angiogenic inducer, 61                                       |
| GO positive regulation of proteasomal uk   | 2 | 17 | 0.3255718 | 10221 tribbles homolog 1 (Drosophila)                                            |
| GO positive regulation of proteasomal uk   | 2 | 17 | 0.3255718 | 28951 tribbles homolog 2 (Drosophila)                                            |
| GO activation of protein kinase A activity | 2 | 17 | 0.3255718 | 112 adenylate cyclase 6                                                          |
| GO activation of protein kinase A activity | 2 | 17 | 0.3255718 | 5577 protein kinase, cAMP-dependent, regulatory, type II, beta                   |

|                                             |   |    |           |                                                                                  |
|---------------------------------------------|---|----|-----------|----------------------------------------------------------------------------------|
| GO DNA damage response, signal transdu      | 2 | 17 | 0.3255718 | 11200 CHK2 checkpoint homolog ( <i>S. pombe</i> )                                |
| GO DNA damage response, signal transdu      | 2 | 17 | 0.3255718 | 5371 promyelocytic leukemia                                                      |
| GO regulation of pH                         | 2 | 17 | 0.3255718 | 1906 endothelin 1                                                                |
| GO regulation of pH                         | 2 | 17 | 0.3255718 | 50617 ATPase, H+ transporting, lysosomal V0 subunit a4                           |
| GO regulation of angiogenesis               | 2 | 17 | 0.3255718 | 1969 EPH receptor A2                                                             |
| GO regulation of angiogenesis               | 2 | 17 | 0.3255718 | 3569 interleukin 6 (interferon, beta 2)                                          |
| GO NF-kappaB binding                        | 2 | 17 | 0.3255718 | 2033 E1A binding protein p300                                                    |
| GO NF-kappaB binding                        | 2 | 17 | 0.3255718 | 4792 nuclear factor of kappa light polypeptide gene enhancer in B-cells inhib    |
| GO rough endoplasmic reticulum              | 2 | 17 | 0.3255718 | 255738 proprotein convertase subtilisin/kexin type 9                             |
| GO rough endoplasmic reticulum              | 2 | 17 | 0.3255718 | 5122 proprotein convertase subtilisin/kexin type 1                               |
| GO anchored to plasma membrane              | 2 | 17 | 0.3255718 | 27076 LY6/PLAUR domain containing 3                                              |
| GO anchored to plasma membrane              | 2 | 17 | 0.3255718 | 285704 RGM domain family, member B                                               |
| GO nuclear body                             | 2 | 17 | 0.3255718 | 28996 homeodomain interacting protein kinase 2                                   |
| GO nuclear body                             | 2 | 17 | 0.3255718 | 6239 ras responsive element binding protein 1                                    |
| GO caspase activator activity               | 2 | 17 | 0.3255718 | 29108 PYD and CARD domain containing                                             |
| GO caspase activator activity               | 2 | 17 | 0.3255718 | 834 caspase 1, apoptosis-related cysteine peptidase (interleukin 1, beta, co     |
| GO 2 iron, 2 sulfur cluster binding         | 2 | 17 | 0.3255718 | 316 aldehyde oxidase 1                                                           |
| GO 2 iron, 2 sulfur cluster binding         | 2 | 17 | 0.3255718 | 8418 cytidine monophosphate-N-acetylneuraminic acid hydroxylase (CMP-N           |
| GO fatty acid binding                       | 2 | 17 | 0.3255718 | 338557 G protein-coupled receptor 120                                            |
| GO fatty acid binding                       | 2 | 17 | 0.3255718 | 6622 synuclein, alpha (non A4 component of amyloid precursor)                    |
| GO positive regulation of cell differentiat | 2 | 17 | 0.3255718 | 3726 jun B proto-oncogene                                                        |
| GO positive regulation of cell differentiat | 2 | 17 | 0.3255718 | 9021 suppressor of cytokine signaling 3                                          |
| GO embryonic pattern specification          | 2 | 17 | 0.3255718 | 4087 SMAD family member 2                                                        |
| GO embryonic pattern specification          | 2 | 17 | 0.3255718 | 84976 dispatched homolog 1 ( <i>Drosophila</i> )                                 |
| GO embryonic hindlimb morphogenesis         | 2 | 17 | 0.3255718 | 4851 Notch homolog 1, translocation-associated ( <i>Drosophila</i> )             |
| GO embryonic hindlimb morphogenesis         | 2 | 17 | 0.3255718 | 5307 paired-like homeodomain 1                                                   |
| GO epithelial to mesenchymal transition     | 2 | 17 | 0.3255718 | 4851 Notch homolog 1, translocation-associated ( <i>Drosophila</i> )             |
| GO epithelial to mesenchymal transition     | 2 | 17 | 0.3255718 | 7049 transforming growth factor, beta receptor III                               |
| GO regulation of excitatory postsynaptic    | 2 | 17 | 0.3255718 | 5025 purinergic receptor P2X, ligand-gated ion channel, 4                        |
| GO regulation of excitatory postsynaptic    | 2 | 17 | 0.3255718 | 6622 synuclein, alpha (non A4 component of amyloid precursor)                    |
| GO glycerol metabolic process               | 2 | 17 | 0.3255718 | 56261 glycerophosphocholine phosphodiesterase GDE1 homolog ( <i>S. cerevisia</i> |
| GO glycerol metabolic process               | 2 | 17 | 0.3255718 | 81544 glycerophosphodiester phosphodiesterase domain containing 5                |
| GO negative regulation of insulin receptc   | 2 | 17 | 0.3255718 | 5791 protein tyrosine phosphatase, receptor type, E                              |
| GO negative regulation of insulin receptc   | 2 | 17 | 0.3255718 | 9021 suppressor of cytokine signaling 3                                          |
| GO coreceptor activity                      | 2 | 17 | 0.3255718 | 7049 transforming growth factor, beta receptor III                               |
| GO coreceptor activity                      | 2 | 17 | 0.3255718 | 7852 chemokine (C-X-C motif) receptor 4                                          |

|                          |    |     |           |                                                                               |
|--------------------------|----|-----|-----------|-------------------------------------------------------------------------------|
| GO myofibril             | 2  | 17  | 0.3255718 | 7111 tropomodulin 1                                                           |
| GO myofibril             | 2  | 17  | 0.3255718 | 84033 obscurin, cytoskeletal calmodulin and titin-interacting RhoGEF          |
| GO ribonuclease activity | 2  | 17  | 0.3255718 | 85441 peroxisomal proliferator-activated receptor A interacting complex 285   |
| GO ribonuclease activity | 2  | 17  | 0.3255718 | 8635 ribonuclease T2                                                          |
| GO cell junction         | 29 | 387 | 0.3299174 | 1139 cholinergic receptor, nicotinic, alpha 7                                 |
| GO cell junction         | 29 | 387 | 0.3299174 | 1364 claudin 4                                                                |
| GO cell junction         | 29 | 387 | 0.3299174 | 143098 membrane protein, palmitoylated 7 (MAGUK p55 subfamily member 7)       |
| GO cell junction         | 29 | 387 | 0.3299174 | 143425 synaptotagmin IX                                                       |
| GO cell junction         | 29 | 387 | 0.3299174 | 154810 angiomin like 1                                                        |
| GO cell junction         | 29 | 387 | 0.3299174 | 1785 dynamin 2                                                                |
| GO cell junction         | 29 | 387 | 0.3299174 | 1803 dipeptidyl-peptidase 4                                                   |
| GO cell junction         | 29 | 387 | 0.3299174 | 23092 Rho GTPase activating protein 26                                        |
| GO cell junction         | 29 | 387 | 0.3299174 | 23208 synaptotagmin XI                                                        |
| GO cell junction         | 29 | 387 | 0.3299174 | 23371 tensin like C1 domain containing phosphatase (tensin 2)                 |
| GO cell junction         | 29 | 387 | 0.3299174 | 2564 gamma-aminobutyric acid (GABA) A receptor, epsilon                       |
| GO cell junction         | 29 | 387 | 0.3299174 | 2706 gap junction protein, beta 2, 26kDa                                      |
| GO cell junction         | 29 | 387 | 0.3299174 | 2707 gap junction protein, beta 3, 31kDa                                      |
| GO cell junction         | 29 | 387 | 0.3299174 | 27134 tight junction protein 3 (zona occludens 3)                             |
| GO cell junction         | 29 | 387 | 0.3299174 | 399694 SHC (Src homology 2 domain containing) family, member 4                |
| GO cell junction         | 29 | 387 | 0.3299174 | 5025 purinergic receptor P2X, ligand-gated ion channel, 4                     |
| GO cell junction         | 29 | 387 | 0.3299174 | 5318 plakophilin 2                                                            |
| GO cell junction         | 29 | 387 | 0.3299174 | 55740 enabled homolog (Drosophila)                                            |
| GO cell junction         | 29 | 387 | 0.3299174 | 55870 ash1 (absent, small, or homeotic)-like (Drosophila)                     |
| GO cell junction         | 29 | 387 | 0.3299174 | 57619 shroom family member 3                                                  |
| GO cell junction         | 29 | 387 | 0.3299174 | 6857 synaptotagmin I                                                          |
| GO cell junction         | 29 | 387 | 0.3299174 | 729993 shisa homolog 9 (Xenopus laevis)                                       |
| GO cell junction         | 29 | 387 | 0.3299174 | 7706 tripartite motif-containing 25                                           |
| GO cell junction         | 29 | 387 | 0.3299174 | 8082 sarcospan (Kras oncogene-associated gene)                                |
| GO cell junction         | 29 | 387 | 0.3299174 | 83604 transmembrane protein 47                                                |
| GO cell junction         | 29 | 387 | 0.3299174 | 8973 cholinergic receptor, nicotinic, alpha 6                                 |
| GO cell junction         | 29 | 387 | 0.3299174 | 9071 claudin 10                                                               |
| GO cell junction         | 29 | 387 | 0.3299174 | 9143 synaptogyrin 3                                                           |
| GO cell junction         | 29 | 387 | 0.3299174 | 9414 tight junction protein 2 (zona occludens 2)                              |
| GO cell death            | 10 | 123 | 0.331858  | 11202 kallikrein-related peptidase 8                                          |
| GO cell death            | 10 | 123 | 0.331858  | 1822 atrophin 1                                                               |
| GO cell death            | 10 | 123 | 0.331858  | 2055 ceroid-lipofuscinosis, neuronal 8 (epilepsy, progressive with mental ret |

|                                       |    |     |           |                                                                                |
|---------------------------------------|----|-----|-----------|--------------------------------------------------------------------------------|
| GO cell death                         | 10 | 123 | 0.331858  | 2521 fused in sarcoma                                                          |
| GO cell death                         | 10 | 123 | 0.331858  | 3373 hyaluronoglucosaminidase 1                                                |
| GO cell death                         | 10 | 123 | 0.331858  | 6622 synuclein, alpha (non A4 component of amyloid precursor)                  |
| GO cell death                         | 10 | 123 | 0.331858  | 7133 tumor necrosis factor receptor superfamily, member 1B                     |
| GO cell death                         | 10 | 123 | 0.331858  | 79152 fatty acid 2-hydroxylase                                                 |
| GO cell death                         | 10 | 123 | 0.331858  | 8313 axin 2                                                                    |
| GO cell death                         | 10 | 123 | 0.331858  | 834 caspase 1, apoptosis-related cysteine peptidase (interleukin 1, beta, co   |
| GO transcription coactivator activity | 15 | 192 | 0.3336553 | 10891 peroxisome proliferator-activated receptor gamma, coactivator 1 alpha    |
| GO transcription coactivator activity | 15 | 192 | 0.3336553 | 11030 RNA binding protein with multiple splicing                               |
| GO transcription coactivator activity | 15 | 192 | 0.3336553 | 1999 E74-like factor 3 (ets domain transcription factor, epithelial-specific ) |
| GO transcription coactivator activity | 15 | 192 | 0.3336553 | 2033 E1A binding protein p300                                                  |
| GO transcription coactivator activity | 15 | 192 | 0.3336553 | 3725 jun oncogene                                                              |
| GO transcription coactivator activity | 15 | 192 | 0.3336553 | 3726 jun B proto-oncogene                                                      |
| GO transcription coactivator activity | 15 | 192 | 0.3336553 | 4778 nuclear factor (erythroid-derived 2), 45kDa                               |
| GO transcription coactivator activity | 15 | 192 | 0.3336553 | 4791 nuclear factor of kappa light polypeptide gene enhancer in B-cells 2 (p4  |
| GO transcription coactivator activity | 15 | 192 | 0.3336553 | 4802 nuclear transcription factor Y, gamma                                     |
| GO transcription coactivator activity | 15 | 192 | 0.3336553 | 5371 promyelocytic leukemia                                                    |
| GO transcription coactivator activity | 15 | 192 | 0.3336553 | 5396 paired related homeobox 1                                                 |
| GO transcription coactivator activity | 15 | 192 | 0.3336553 | 6256 retinoid X receptor, alpha                                                |
| GO transcription coactivator activity | 15 | 192 | 0.3336553 | 6604 SWI/SNF related, matrix associated, actin dependent regulator of chrom    |
| GO transcription coactivator activity | 15 | 192 | 0.3336553 | 85441 peroxisomal proliferator-activated receptor A interacting complex 285    |
| GO transcription coactivator activity | 15 | 192 | 0.3336553 | 9971 nuclear receptor subfamily 1, group H, member 4                           |
| GO transporter activity               | 22 | 290 | 0.3368005 | 10312 T-cell, immune regulator 1, ATPase, H+ transporting, lysosomal V0 sub    |
| GO transporter activity               | 22 | 290 | 0.3368005 | 113235 solute carrier family 46 (folate transporter), member 1                 |
| GO transporter activity               | 22 | 290 | 0.3368005 | 123096 solute carrier family 25, member 29                                     |
| GO transporter activity               | 22 | 290 | 0.3368005 | 1382 cellular retinoic acid binding protein 2                                  |
| GO transporter activity               | 22 | 290 | 0.3368005 | 143425 synaptotagmin IX                                                        |
| GO transporter activity               | 22 | 290 | 0.3368005 | 23208 synaptotagmin XI                                                         |
| GO transporter activity               | 22 | 290 | 0.3368005 | 28231 solute carrier organic anion transporter family, member 4A1              |
| GO transporter activity               | 22 | 290 | 0.3368005 | 28982 feline leukemia virus subgroup C cellular receptor 1                     |
| GO transporter activity               | 22 | 290 | 0.3368005 | 368 ATP-binding cassette, sub-family C (CFTR/MRP), member 6                    |
| GO transporter activity               | 22 | 290 | 0.3368005 | 5243 ATP-binding cassette, sub-family B (MDR/TAP), member 1                    |
| GO transporter activity               | 22 | 290 | 0.3368005 | 55867 solute carrier family 22 (organic anion/urate transporter), member 11    |
| GO transporter activity               | 22 | 290 | 0.3368005 | 5950 retinol binding protein 4, plasma                                         |
| GO transporter activity               | 22 | 290 | 0.3368005 | 63027 solute carrier family 22, member 23                                      |
| GO transporter activity               | 22 | 290 | 0.3368005 | 6521 solute carrier family 4, anion exchanger, member 1 (erythrocyte memb      |

|                                         |    |     |           |                                                                           |
|-----------------------------------------|----|-----|-----------|---------------------------------------------------------------------------|
| GO transporter activity                 | 22 | 290 | 0.3368005 | 6564 solute carrier family 15 (oligopeptide transporter), member 1        |
| GO transporter activity                 | 22 | 290 | 0.3368005 | 6565 solute carrier family 15 (H+/peptide transporter), member 2          |
| GO transporter activity                 | 22 | 290 | 0.3368005 | 6857 synaptotagmin I                                                      |
| GO transporter activity                 | 22 | 290 | 0.3368005 | 8671 solute carrier family 4, sodium bicarbonate cotransporter, member 4  |
| GO transporter activity                 | 22 | 290 | 0.3368005 | 8992 ATPase, H+ transporting, lysosomal 9kDa, V0 subunit e1               |
| GO transporter activity                 | 22 | 290 | 0.3368005 | 9182 Ras association (RalGDS/AF-6) domain family (N-terminal) member 9    |
| GO transporter activity                 | 22 | 290 | 0.3368005 | 9481 solute carrier family 25, member 27                                  |
| GO transporter activity                 | 22 | 290 | 0.3368005 | 9962 solute carrier family 23 (nucleobase transporters), member 2         |
| GO protein tyrosine/serine/threonine ph | 3  | 30  | 0.3373522 | 11156 protein tyrosine phosphatase type IVA, member 3                     |
| GO protein tyrosine/serine/threonine ph | 3  | 30  | 0.3373522 | 54961 slingshot homolog 3 (Drosophila)                                    |
| GO protein tyrosine/serine/threonine ph | 3  | 30  | 0.3373522 | 8556 CDC14 cell division cycle 14 homolog A (S. cerevisiae)               |
| GO cell morphogenesis                   | 3  | 30  | 0.3373522 | 134549 shroom family member 1                                             |
| GO cell morphogenesis                   | 3  | 30  | 0.3373522 | 57619 shroom family member 3                                              |
| GO cell morphogenesis                   | 3  | 30  | 0.3373522 | 604 B-cell CLL/lymphoma 6                                                 |
| GO gene silencing by RNA                | 3  | 30  | 0.3373522 | 143689 piwi-like 4 (Drosophila)                                           |
| GO gene silencing by RNA                | 3  | 30  | 0.3373522 | 55124 piwi-like 2 (Drosophila)                                            |
| GO gene silencing by RNA                | 3  | 30  | 0.3373522 | 9271 piwi-like 1 (Drosophila)                                             |
| GO BMP signaling pathway                | 4  | 43  | 0.3384759 | 285704 RGM domain family, member B                                        |
| GO BMP signaling pathway                | 4  | 43  | 0.3384759 | 64388 gremlin 2, cysteine knot superfamily, homolog (Xenopus laevis)      |
| GO BMP signaling pathway                | 4  | 43  | 0.3384759 | 652 bone morphogenetic protein 4                                          |
| GO BMP signaling pathway                | 4  | 43  | 0.3384759 | 7049 transforming growth factor, beta receptor III                        |
| GO cell-cell adhesion                   | 6  | 70  | 0.3447352 | 10076 protein tyrosine phosphatase, receptor type, U                      |
| GO cell-cell adhesion                   | 6  | 70  | 0.3447352 | 1009 cadherin 11, type 2, OB-cadherin (osteoblast)                        |
| GO cell-cell adhesion                   | 6  | 70  | 0.3447352 | 4008 LIM domain 7                                                         |
| GO cell-cell adhesion                   | 6  | 70  | 0.3447352 | 5318 plakophilin 2                                                        |
| GO cell-cell adhesion                   | 6  | 70  | 0.3447352 | 79872 Cas-Br-M (murine) ecotropic retroviral transforming sequence-like 1 |
| GO cell-cell adhesion                   | 6  | 70  | 0.3447352 | 84059 G protein-coupled receptor 98                                       |
| GO growth factor activity               | 12 | 152 | 0.3452406 | 1435 colony stimulating factor 1 (macrophage)                             |
| GO growth factor activity               | 12 | 152 | 0.3452406 | 183 angiotensinogen (serpin peptidase inhibitor, clade A, member 8)       |
| GO growth factor activity               | 12 | 152 | 0.3452406 | 1839 heparin-binding EGF-like growth factor                               |
| GO growth factor activity               | 12 | 152 | 0.3452406 | 23529 cardiotrophin-like cytokine factor 1                                |
| GO growth factor activity               | 12 | 152 | 0.3452406 | 26281 fibroblast growth factor 20                                         |
| GO growth factor activity               | 12 | 152 | 0.3452406 | 3479 insulin-like growth factor 1 (somatomedin C)                         |
| GO growth factor activity               | 12 | 152 | 0.3452406 | 3569 interleukin 6 (interferon, beta 2)                                   |
| GO growth factor activity               | 12 | 152 | 0.3452406 | 4254 KIT ligand                                                           |
| GO growth factor activity               | 12 | 152 | 0.3452406 | 4856 nephroblastoma overexpressed gene                                    |

|                                            |    |     |           |                                                                               |
|--------------------------------------------|----|-----|-----------|-------------------------------------------------------------------------------|
| GO growth factor activity                  | 12 | 152 | 0.3452406 | 627 brain-derived neurotrophic factor                                         |
| GO growth factor activity                  | 12 | 152 | 0.3452406 | 652 bone morphogenetic protein 4                                              |
| GO growth factor activity                  | 12 | 152 | 0.3452406 | 9518 growth differentiation factor 15                                         |
| GO structural constituent of tooth enamel  | 1  | 6   | 0.3461221 | 10117 enamelin                                                                |
| GO alcohol dehydrogenase (NAD) activity    | 1  | 6   | 0.3461221 | 10170 dehydrogenase/reductase (SDR family) member 9                           |
| GO protein phosphatase 2B binding          | 1  | 6   | 0.3461221 | 10231 regulator of calcineurin 2                                              |
| GO cellular phosphate ion homeostasis      | 1  | 6   | 0.3461221 | 10568 solute carrier family 34 (sodium phosphate), member 2                   |
| GO response to fructose stimulus           | 1  | 6   | 0.3461221 | 10568 solute carrier family 34 (sodium phosphate), member 2                   |
| GO bicarbonate transport                   | 1  | 6   | 0.3461221 | 1080 cystic fibrosis transmembrane conductance regulator (ATP-binding cas     |
| GO fatty acid oxidation                    | 1  | 6   | 0.3461221 | 10891 peroxisome proliferator-activated receptor gamma, coactivator 1 alpha   |
| GO acylglycerol lipase activity            | 1  | 6   | 0.3461221 | 11343 monoglyceride lipase                                                    |
| GO alcohol metabolic process               | 1  | 6   | 0.3461221 | 124 alcohol dehydrogenase 1A (class I), alpha polypeptide                     |
| GO positive regulation of translational in | 1  | 6   | 0.3461221 | 127933 U2AF homology motif (UHM) kinase 1                                     |
| GO response to dietary excess              | 1  | 6   | 0.3461221 | 130399 activin A receptor, type IC                                            |
| GO glycogen catabolic process              | 1  | 6   | 0.3461221 | 1373 carbamoyl-phosphate synthetase 1, mitochondrial                          |
| GO response to glucagon stimulus           | 1  | 6   | 0.3461221 | 1373 carbamoyl-phosphate synthetase 1, mitochondrial                          |
| GO retinoic acid metabolic process         | 1  | 6   | 0.3461221 | 1382 cellular retinoic acid binding protein 2                                 |
| GO activation of transmembrane receptc     | 1  | 6   | 0.3461221 | 154 adrenergic, beta-2-, receptor, surface                                    |
| GO synaptic vesicle transport              | 1  | 6   | 0.3461221 | 1785 dynamin 2                                                                |
| GO negative regulation of synaptic transi  | 1  | 6   | 0.3461221 | 1813 dopamine receptor D2                                                     |
| GO positive regulation of growth hormor    | 1  | 6   | 0.3461221 | 1813 dopamine receptor D2                                                     |
| GO regulation of inhibitory postsynaptic   | 1  | 6   | 0.3461221 | 1815 dopamine receptor D4                                                     |
| GO positive regulation of epidermal grow   | 1  | 6   | 0.3461221 | 183 angiotensinogen (serpin peptidase inhibitor, clade A, member 8)           |
| GO vasoconstriction                        | 1  | 6   | 0.3461221 | 1906 endothelin 1                                                             |
| GO glycoprotein biosynthetic process       | 1  | 6   | 0.3461221 | 192134 UDP-GlcNAc:betaGal beta-1,3-N-acetylglucosaminyltransferase 6 (core    |
| GO glucocorticoid receptor binding         | 1  | 6   | 0.3461221 | 2033 E1A binding protein p300                                                 |
| GO neuromuscular process controlling pc    | 1  | 6   | 0.3461221 | 2055 ceroid-lipofuscinosis, neuronal 8 (epilepsy, progressive with mental ret |
| GO spinal cord motor neuron differentia    | 1  | 6   | 0.3461221 | 2055 ceroid-lipofuscinosis, neuronal 8 (epilepsy, progressive with mental ret |
| GO positive regulation of synaptic transn  | 1  | 6   | 0.3461221 | 2066 v-erb-a erythroblastic leukemia viral oncogene homolog 4 (avian)         |
| GO germ cell migration                     | 1  | 6   | 0.3461221 | 2296 forkhead box C1                                                          |
| GO actomyosin structure organization       | 1  | 6   | 0.3461221 | 22998 LIM and calponin homology domains 1                                     |
| GO histone H3-K9 demethylation             | 1  | 6   | 0.3461221 | 23081 lysine (K)-specific demethylase 4C                                      |
| GO histone H4-K5 acetylation               | 1  | 6   | 0.3461221 | 23338 PHD finger protein 15                                                   |
| GO histone H4-K8 acetylation               | 1  | 6   | 0.3461221 | 23338 PHD finger protein 15                                                   |
| GO high-density lipoprotein binding        | 1  | 6   | 0.3461221 | 23780 apolipoprotein L, 2                                                     |
| GO arachidonic acid metabolic process      | 1  | 6   | 0.3461221 | 240 arachidonate 5-lipoxygenase                                               |

|                                            |   |   |           |                                                                               |
|--------------------------------------------|---|---|-----------|-------------------------------------------------------------------------------|
| GO nuclear envelope lumen                  | 1 | 6 | 0.3461221 | 240 arachidonate 5-lipoxygenase                                               |
| GO fucose metabolic process                | 1 | 6 | 0.3461221 | 2517 fucosidase, alpha-L- 1, tissue                                           |
| GO extrinsic to external side of plasma m  | 1 | 6 | 0.3461221 | 255738 proprotein convertase subtilisin/kexin type 9                          |
| GO AP-2 adaptor complex                    | 1 | 6 | 0.3461221 | 26119 low density lipoprotein receptor adaptor protein 1                      |
| GO glycoprotein catabolic process          | 1 | 6 | 0.3461221 | 26270 F-box protein 6                                                         |
| GO regulation of synaptic transmission, g  | 1 | 6 | 0.3461221 | 2911 glutamate receptor, metabotropic 1                                       |
| GO transmembrane receptor protein tyros    | 1 | 6 | 0.3461221 | 29760 B-cell linker                                                           |
| GO phagocytic vesicle                      | 1 | 6 | 0.3461221 | 311 annexin A11                                                               |
| GO negative regulation of survival gene p  | 1 | 6 | 0.3461221 | 3169 forkhead box A1                                                          |
| GO epithelial cell development             | 1 | 6 | 0.3461221 | 3175 one cut homeobox 1                                                       |
| GO hyaluronoglucosaminidase activity       | 1 | 6 | 0.3461221 | 3373 hyaluronoglucosaminidase 1                                               |
| GO lung vasculature development            | 1 | 6 | 0.3461221 | 3479 insulin-like growth factor 1 (somatomedin C)                             |
| GO positive regulation of insulin-like gro | 1 | 6 | 0.3461221 | 3479 insulin-like growth factor 1 (somatomedin C)                             |
| GO ammonia transmembrane transporte        | 1 | 6 | 0.3461221 | 358 aquaporin 1 (Colton blood group)                                          |
| GO ammonium transport                      | 1 | 6 | 0.3461221 | 358 aquaporin 1 (Colton blood group)                                          |
| GO cellular response to hypoxia            | 1 | 6 | 0.3461221 | 358 aquaporin 1 (Colton blood group)                                          |
| GO cellular response to UV                 | 1 | 6 | 0.3461221 | 358 aquaporin 1 (Colton blood group)                                          |
| GO activation of protein kinase B activity | 1 | 6 | 0.3461221 | 3643 insulin receptor                                                         |
| GO lipoic acid binding                     | 1 | 6 | 0.3461221 | 3643 insulin receptor                                                         |
| GO response to manganese ion               | 1 | 6 | 0.3461221 | 3643 insulin receptor                                                         |
| GO plasma membrane enriched fraction       | 1 | 6 | 0.3461221 | 3709 inositol 1,4,5-triphosphate receptor, type 2                             |
| GO striated muscle cell differentiation    | 1 | 6 | 0.3461221 | 3845 v-Ki-ras2 Kirsten rat sarcoma viral oncogene homolog                     |
| GO endothelial cell differentiation        | 1 | 6 | 0.3461221 | 3911 laminin, alpha 5                                                         |
| GO glutathione binding                     | 1 | 6 | 0.3461221 | 4056 leukotriene C4 synthase                                                  |
| GO catecholamine metabolic process         | 1 | 6 | 0.3461221 | 4128 monoamine oxidase A                                                      |
| GO enucleate erythrocyte differentiation   | 1 | 6 | 0.3461221 | 4151 myoglobin                                                                |
| GO forebrain neuron differentiation        | 1 | 6 | 0.3461221 | 429 achaete-scute complex homolog 1 (Drosophila)                              |
| GO response to folic acid                  | 1 | 6 | 0.3461221 | 429 achaete-scute complex homolog 1 (Drosophila)                              |
| GO cytoplasmic sequestering of NF-kapp     | 1 | 6 | 0.3461221 | 4792 nuclear factor of kappa light polypeptide gene enhancer in B-cells inhib |
| GO cadmium ion binding                     | 1 | 6 | 0.3461221 | 4842 nitric oxide synthase 1 (neuronal)                                       |
| GO negative regulation of glutamate secr   | 1 | 6 | 0.3461221 | 4889 neuropeptide Y receptor Y5                                               |
| GO response to fluid shear stress          | 1 | 6 | 0.3461221 | 5025 purinergic receptor P2X, ligand-gated ion channel, 4                     |
| GO L-phenylalanine catabolic process       | 1 | 6 | 0.3461221 | 5053 phenylalanine hydroxylase                                                |
| GO startle response                        | 1 | 6 | 0.3461221 | 5071 Parkinson disease (autosomal recessive, juvenile) 2, parkin              |
| GO peptide cross-linking via chondroitin   | 1 | 6 | 0.3461221 | 50859 sparc/osteonectin, cwcv and kazal-like domains proteoglycan (testican)  |
| GO glycolipid transport                    | 1 | 6 | 0.3461221 | 51228 glycolipid transfer protein                                             |

|    |                                          |   |   |           |                                                                               |
|----|------------------------------------------|---|---|-----------|-------------------------------------------------------------------------------|
| GO | rough endoplasmic reticulum membr        | 1 | 6 | 0.3461221 | 5351 procollagen-lysine 1, 2-oxoglutarate 5-dioxygenase 1                     |
| GO | antigen processing and presentation      | 1 | 6 | 0.3461221 | 55080 TAP binding protein-like                                                |
| GO | meiotic prophase I                       | 1 | 6 | 0.3461221 | 55124 piwi-like 2 (Drosophila)                                                |
| GO | negative regulation of T cell activatio  | 1 | 6 | 0.3461221 | 55824 phosphoprotein associated with glycosphingolipid microdomains 1         |
| GO | DNA packaging                            | 1 | 6 | 0.3461221 | 55870 ash1 (absent, small, or homeotic)-like (Drosophila)                     |
| GO | complement activation, lectin pathw:     | 1 | 6 | 0.3461221 | 5648 mannan-binding lectin serine peptidase 1 (C4/C2 activating component     |
| GO | parturition                              | 1 | 6 | 0.3461221 | 5737 prostaglandin F receptor (FP)                                            |
| GO | cytidine deaminase activity              | 1 | 6 | 0.3461221 | 57379 activation-induced cytidine deaminase                                   |
| GO | apical junction complex                  | 1 | 6 | 0.3461221 | 57619 shroom family member 3                                                  |
| GO | exocytic vesicle                         | 1 | 6 | 0.3461221 | 5873 RAB27A, member RAS oncogene family                                       |
| GO | erythrocyte development                  | 1 | 6 | 0.3461221 | 604 B-cell CLL/lymphoma 6                                                     |
| GO | glycosphingolipid binding                | 1 | 6 | 0.3461221 | 6402 selectin L                                                               |
| GO | negative regulation of interleukin-2 p   | 1 | 6 | 0.3461221 | 64127 nucleotide-binding oligomerization domain containing 2                  |
| GO | sodium channel regulator activity        | 1 | 6 | 0.3461221 | 64699 transmembrane protease, serine 3                                        |
| GO | negative regulation of striated muscl    | 1 | 6 | 0.3461221 | 652 bone morphogenetic protein 4                                              |
| GO | ubiquitin-ubiquitin ligase activity      | 1 | 6 | 0.3461221 | 6563 solute carrier family 14 (urea transporter), member 1 (Kidd blood group) |
| GO | Hsp70 protein binding                    | 1 | 6 | 0.3461221 | 6622 synuclein, alpha (non A4 component of amyloid precursor)                 |
| GO | amine metabolic process                  | 1 | 6 | 0.3461221 | 6819 sulfotransferase family, cytosolic, 1C, member 2                         |
| GO | enzyme linked receptor protein signa     | 1 | 6 | 0.3461221 | 6850 spleen tyrosine kinase                                                   |
| GO | positive regulation of alpha-beta T ce   | 1 | 6 | 0.3461221 | 6850 spleen tyrosine kinase                                                   |
| GO | positive regulation of B cell differenti | 1 | 6 | 0.3461221 | 6850 spleen tyrosine kinase                                                   |
| GO | macrophage activation                    | 1 | 6 | 0.3461221 | 7099 toll-like receptor 4                                                     |
| GO | positive regulation of tumor necrosis    | 1 | 6 | 0.3461221 | 7099 toll-like receptor 4                                                     |
| GO | podosome                                 | 1 | 6 | 0.3461221 | 7170 tropomyosin 3                                                            |
| GO | store-operated calcium channel activ     | 1 | 6 | 0.3461221 | 7223 transient receptor potential cation channel, subfamily C, member 4       |
| GO | C-X-C chemokine receptor activity        | 1 | 6 | 0.3461221 | 7852 chemokine (C-X-C motif) receptor 4                                       |
| GO | DNA N-glycosylase activity               | 1 | 6 | 0.3461221 | 79661 nei endonuclease VIII-like 1 (E. coli)                                  |
| GO | thyroid hormone receptor activity        | 1 | 6 | 0.3461221 | 8013 nuclear receptor subfamily 4, group A, member 3                          |
| GO | hyaluronan metabolic process             | 1 | 6 | 0.3461221 | 80760 inter-alpha (globulin) inhibitor H5                                     |
| GO | juxtaparanode region of axon             | 1 | 6 | 0.3461221 | 8514 potassium voltage-gated channel, shaker-related subfamily, beta mem      |
| GO | mammary gland epithelial cell prolife    | 1 | 6 | 0.3461221 | 8600 tumor necrosis factor (ligand) superfamily, member 11                    |
| GO | proton-transporting V-type ATPase, \     | 1 | 6 | 0.3461221 | 8992 ATPase, H+ transporting, lysosomal 9kDa, V0 subunit e1                   |
| GO | trophoblast giant cell differentiation   | 1 | 6 | 0.3461221 | 9021 suppressor of cytokine signaling 3                                       |
| GO | phosphatidylinositol-3,5-bisphosphat     | 1 | 6 | 0.3461221 | 91404 SEC14 and spectrin domains 1                                            |
| GO | positive regulation of BMP signaling p   | 1 | 6 | 0.3461221 | 94 activin A receptor type II-like 1                                          |
| GO | phospholipid homeostasis                 | 1 | 6 | 0.3461221 | 9619 ATP-binding cassette, sub-family G (WHITE), member 1                     |



|    |                                        |   |    |           |                                                                               |
|----|----------------------------------------|---|----|-----------|-------------------------------------------------------------------------------|
| GO | bile acid binding                      | 1 | 6  | 0.3461221 | 9971 nuclear receptor subfamily 1, group H, member 4                          |
| GO | locomotory behavior                    | 5 | 57 | 0.3499555 | 1813 dopamine receptor D2                                                     |
| GO | locomotory behavior                    | 5 | 57 | 0.3499555 | 2911 glutamate receptor, metabotropic 1                                       |
| GO | locomotory behavior                    | 5 | 57 | 0.3499555 | 4886 neuropeptide Y receptor Y1                                               |
| GO | locomotory behavior                    | 5 | 57 | 0.3499555 | 51168 myosin XVA                                                              |
| GO | locomotory behavior                    | 5 | 57 | 0.3499555 | 56172 ankylosis, progressive homolog (mouse)                                  |
| GO | neuron migration                       | 5 | 57 | 0.3499555 | 429 achaete-scute complex homolog 1 (Drosophila)                              |
| GO | neuron migration                       | 5 | 57 | 0.3499555 | 4692 necdin homolog (mouse)                                                   |
| GO | neuron migration                       | 5 | 57 | 0.3499555 | 4929 nuclear receptor subfamily 4, group A, member 2                          |
| GO | neuron migration                       | 5 | 57 | 0.3499555 | 7026 nuclear receptor subfamily 2, group F, member 2                          |
| GO | neuron migration                       | 5 | 57 | 0.3499555 | 885 cholecystokinin                                                           |
| GO | DNA damage checkpoint                  | 2 | 18 | 0.3511682 | 11200 CHK2 checkpoint homolog (S. pombe)                                      |
| GO | DNA damage checkpoint                  | 2 | 18 | 0.3511682 | 26270 F-box protein 6                                                         |
| GO | regulation of insulin secretion        | 2 | 18 | 0.3511682 | 143425 synaptotagmin IX                                                       |
| GO | regulation of insulin secretion        | 2 | 18 | 0.3511682 | 222546 regulatory factor X, 6                                                 |
| GO | embryonic placenta development         | 2 | 18 | 0.3511682 | 2624 GATA binding protein 2                                                   |
| GO | embryonic placenta development         | 2 | 18 | 0.3511682 | 6692 serine peptidase inhibitor, Kunitz type 1                                |
| GO | response to inorganic substance        | 2 | 18 | 0.3511682 | 4056 leukotriene C4 synthase                                                  |
| GO | response to inorganic substance        | 2 | 18 | 0.3511682 | 4929 nuclear receptor subfamily 4, group A, member 2                          |
| GO | pancreas development                   | 2 | 18 | 0.3511682 | 4087 SMAD family member 2                                                     |
| GO | pancreas development                   | 2 | 18 | 0.3511682 | 5122 proprotein convertase subtilisin/kexin type 1                            |
| GO | WW domain binding                      | 2 | 18 | 0.3511682 | 4778 nuclear factor (erythroid-derived 2), 45kDa                              |
| GO | WW domain binding                      | 2 | 18 | 0.3511682 | 55740 enabled homolog (Drosophila)                                            |
| GO | protein import into nucleus, transloc  | 2 | 18 | 0.3511682 | 4792 nuclear factor of kappa light polypeptide gene enhancer in B-cells inhib |
| GO | protein import into nucleus, transloc  | 2 | 18 | 0.3511682 | 604 B-cell CLL/lymphoma 6                                                     |
| GO | ADP binding                            | 2 | 18 | 0.3511682 | 498 ATP synthase, H+ transporting, mitochondrial F1 complex, alpha subun      |
| GO | ADP binding                            | 2 | 18 | 0.3511682 | 9619 ATP-binding cassette, sub-family G (WHITE), member 1                     |
| GO | proton-transporting ATPase activity, i | 2 | 18 | 0.3511682 | 498 ATP synthase, H+ transporting, mitochondrial F1 complex, alpha subun      |
| GO | proton-transporting ATPase activity, i | 2 | 18 | 0.3511682 | 8992 ATPase, H+ transporting, lysosomal 9kDa, V0 subunit e1                   |
| GO | SNARE complex                          | 2 | 18 | 0.3511682 | 51272 blocked early in transport 1 homolog (S. cerevisiae)-like               |
| GO | SNARE complex                          | 2 | 18 | 0.3511682 | 8673 vesicle-associated membrane protein 8 (endobrevin)                       |
| GO | anion transport                        | 2 | 18 | 0.3511682 | 6521 solute carrier family 4, anion exchanger, member 1 (erythrocyte memb     |
| GO | anion transport                        | 2 | 18 | 0.3511682 | 8671 solute carrier family 4, sodium bicarbonate cotransporter, member 4      |
| GO | cytolysis                              | 2 | 18 | 0.3511682 | 731 complement component 8, alpha polypeptide                                 |
| GO | cytolysis                              | 2 | 18 | 0.3511682 | 8542 apolipoprotein L, 1                                                      |
| GO | recycling endosome                     | 2 | 18 | 0.3511682 | 80223 RAB11 family interacting protein 1 (class I)                            |

|                                                        |    |     |           |                                                                               |
|--------------------------------------------------------|----|-----|-----------|-------------------------------------------------------------------------------|
| GO recycling endosome                                  | 2  | 18  | 0.3511682 | 9619 ATP-binding cassette, sub-family G (WHITE), member 1                     |
| GO pattern specification process                       | 4  | 44  | 0.3543571 | 2737 GLI family zinc finger 3                                                 |
| GO pattern specification process                       | 4  | 44  | 0.3543571 | 429 achaete-scute complex homolog 1 (Drosophila)                              |
| GO pattern specification process                       | 4  | 44  | 0.3543571 | 57619 shroom family member 3                                                  |
| GO pattern specification process                       | 4  | 44  | 0.3543571 | 8646 chordin                                                                  |
| GO protein stabilization                               | 3  | 31  | 0.3565002 | 10891 peroxisome proliferator-activated receptor gamma, coactivator 1 alpha   |
| GO protein stabilization                               | 3  | 31  | 0.3565002 | 4194 Mdm4 p53 binding protein homolog (mouse)                                 |
| GO protein stabilization                               | 3  | 31  | 0.3565002 | 5371 promyelocytic leukemia                                                   |
| GO cation binding                                      | 3  | 31  | 0.3565002 | 1117 chitinase 3-like 2                                                       |
| GO cation binding                                      | 3  | 31  | 0.3565002 | 2990 glucuronidase, beta                                                      |
| GO cation binding                                      | 3  | 31  | 0.3565002 | 5016 oviductal glycoprotein 1, 120kDa                                         |
| GO phospholipid metabolic process                      | 3  | 31  | 0.3565002 | 2055 ceroid-lipofuscinosis, neuronal 8 (epilepsy, progressive with mental ret |
| GO phospholipid metabolic process                      | 3  | 31  | 0.3565002 | 255738 proprotein convertase subtilisin/kexin type 9                          |
| GO phospholipid metabolic process                      | 3  | 31  | 0.3565002 | 6622 synuclein, alpha (non A4 component of amyloid precursor)                 |
| GO NADP or NADPH binding                               | 3  | 31  | 0.3565002 | 27035 NADPH oxidase 1                                                         |
| GO NADP or NADPH binding                               | 3  | 31  | 0.3565002 | 4842 nitric oxide synthase 1 (neuronal)                                       |
| GO NADP or NADPH binding                               | 3  | 31  | 0.3565002 | 9563 hexose-6-phosphate dehydrogenase (glucose 1-dehydrogenase)               |
| GO embryonic digit morphogenesis                       | 3  | 31  | 0.3565002 | 2737 GLI family zinc finger 3                                                 |
| GO embryonic digit morphogenesis                       | 3  | 31  | 0.3565002 | 28982 feline leukemia virus subgroup C cellular receptor 1                    |
| GO embryonic digit morphogenesis                       | 3  | 31  | 0.3565002 | 652 bone morphogenetic protein 4                                              |
| GO ATPase activity, coupled to transmembrane transport | 3  | 31  | 0.3565002 | 368 ATP-binding cassette, sub-family C (CFTR/MRP), member 6                   |
| GO ATPase activity, coupled to transmembrane transport | 3  | 31  | 0.3565002 | 5243 ATP-binding cassette, sub-family B (MDR/TAP), member 1                   |
| GO ATPase activity, coupled to transmembrane transport | 3  | 31  | 0.3565002 | 5244 ATP-binding cassette, sub-family B (MDR/TAP), member 4                   |
| GO early endosome                                      | 7  | 85  | 0.3618806 | 1080 cystic fibrosis transmembrane conductance regulator (ATP-binding cas     |
| GO early endosome                                      | 7  | 85  | 0.3618806 | 11156 protein tyrosine phosphatase type IVA, member 3                         |
| GO early endosome                                      | 7  | 85  | 0.3618806 | 22906 trafficking protein, kinesin binding 1                                  |
| GO early endosome                                      | 7  | 85  | 0.3618806 | 26119 low density lipoprotein receptor adaptor protein 1                      |
| GO early endosome                                      | 7  | 85  | 0.3618806 | 27035 NADPH oxidase 1                                                         |
| GO early endosome                                      | 7  | 85  | 0.3618806 | 8673 vesicle-associated membrane protein 8 (endobrevin)                       |
| GO early endosome                                      | 7  | 85  | 0.3618806 | 9595 cytohesin 1 interacting protein                                          |
| GO intracellular signaling pathway                     | 14 | 182 | 0.3629906 | 10156 RAS p21 protein activator 4                                             |
| GO intracellular signaling pathway                     | 14 | 182 | 0.3629906 | 1154 cytokine inducible SH2-containing protein                                |
| GO intracellular signaling pathway                     | 14 | 182 | 0.3629906 | 118987 PDZ domain containing 8                                                |
| GO intracellular signaling pathway                     | 14 | 182 | 0.3629906 | 29760 B-cell linker                                                           |
| GO intracellular signaling pathway                     | 14 | 182 | 0.3629906 | 4087 SMAD family member 2                                                     |
| GO intracellular signaling pathway                     | 14 | 182 | 0.3629906 | 5577 protein kinase, cAMP-dependent, regulatory, type II, beta                |

|                                                      |    |     |           |                                                                               |
|------------------------------------------------------|----|-----|-----------|-------------------------------------------------------------------------------|
| GO intracellular signaling pathway                   | 14 | 182 | 0.3629906 | 55824 phosphoprotein associated with glycosphingolipid microdomains 1         |
| GO intracellular signaling pathway                   | 14 | 182 | 0.3629906 | 57799 RAB40C, member RAS oncogene family                                      |
| GO intracellular signaling pathway                   | 14 | 182 | 0.3629906 | 6101 retinitis pigmentosa 1 (autosomal dominant)                              |
| GO intracellular signaling pathway                   | 14 | 182 | 0.3629906 | 64127 nucleotide-binding oligomerization domain containing 2                  |
| GO intracellular signaling pathway                   | 14 | 182 | 0.3629906 | 64798 DEP domain containing 6                                                 |
| GO intracellular signaling pathway                   | 14 | 182 | 0.3629906 | 6494 signal-induced proliferation-associated 1                                |
| GO intracellular signaling pathway                   | 14 | 182 | 0.3629906 | 7464 coronin, actin binding protein, 2A                                       |
| GO intracellular signaling pathway                   | 14 | 182 | 0.3629906 | 9021 suppressor of cytokine signaling 3                                       |
| GO regulation of cell shape                          | 5  | 58  | 0.3638013 | 10435 CDC42 effector protein (Rho GTPase binding) 2                           |
| GO regulation of cell shape                          | 5  | 58  | 0.3638013 | 148170 CDC42 effector protein (Rho GTPase binding) 5                          |
| GO regulation of cell shape                          | 5  | 58  | 0.3638013 | 152273 FYVE, RhoGEF and PH domain containing 5                                |
| GO regulation of cell shape                          | 5  | 58  | 0.3638013 | 3689 integrin, beta 2 (complement component 3 receptor 3 and 4 subunit)       |
| GO regulation of cell shape                          | 5  | 58  | 0.3638013 | 57619 shroom family member 3                                                  |
| GO blood circulation                                 | 4  | 45  | 0.3702364 | 4223 mesenchyme homeobox 2                                                    |
| GO blood circulation                                 | 4  | 45  | 0.3702364 | 4524 5,10-methylenetetrahydrofolate reductase (NADPH)                         |
| GO blood circulation                                 | 4  | 45  | 0.3702364 | 4778 nuclear factor (erythroid-derived 2), 45kDa                              |
| GO blood circulation                                 | 4  | 45  | 0.3702364 | 94 activin A receptor type II-like 1                                          |
| GO regulation of G-protein coupled receptor activity | 3  | 32  | 0.3755707 | 10268 receptor (G protein-coupled) activity modifying protein 3               |
| GO regulation of G-protein coupled receptor activity | 3  | 32  | 0.3755707 | 6004 regulator of G-protein signaling 16                                      |
| GO regulation of G-protein coupled receptor activity | 3  | 32  | 0.3755707 | 8786 regulator of G-protein signaling 11                                      |
| GO peptide binding                                   | 3  | 32  | 0.3755707 | 1508 cathepsin B                                                              |
| GO peptide binding                                   | 3  | 32  | 0.3755707 | 1803 dipeptidyl-peptidase 4                                                   |
| GO peptide binding                                   | 3  | 32  | 0.3755707 | 9971 nuclear receptor subfamily 1, group H, member 4                          |
| GO peptidyl-tyrosine phosphorylation                 | 3  | 32  | 0.3755707 | 2066 v-erb-a erythroblastic leukemia viral oncogene homolog 4 (avian)         |
| GO peptidyl-tyrosine phosphorylation                 | 3  | 32  | 0.3755707 | 3643 insulin receptor                                                         |
| GO peptidyl-tyrosine phosphorylation                 | 3  | 32  | 0.3755707 | 3815 v-kit Hardy-Zuckerman 4 feline sarcoma viral oncogene homolog            |
| GO G2/M transition of mitotic cell cycle             | 2  | 19  | 0.3764191 | 1785 dynamin 2                                                                |
| GO G2/M transition of mitotic cell cycle             | 2  | 19  | 0.3764191 | 5218 cyclin-dependent kinase 14                                               |
| GO negative regulation of adenylate cyclase activity | 2  | 19  | 0.3764191 | 1813 dopamine receptor D2                                                     |
| GO negative regulation of adenylate cyclase activity | 2  | 19  | 0.3764191 | 1815 dopamine receptor D4                                                     |
| GO patterning of blood vessels                       | 2  | 19  | 0.3764191 | 1906 endothelin 1                                                             |
| GO patterning of blood vessels                       | 2  | 19  | 0.3764191 | 2303 forkhead box C2 (MFH-1, mesenchyme forkhead 1)                           |
| GO protein processing                                | 2  | 19  | 0.3764191 | 2737 GLI family zinc finger 3                                                 |
| GO protein processing                                | 2  | 19  | 0.3764191 | 834 caspase 1, apoptosis-related cysteine peptidase (interleukin 1, beta, co) |
| GO heterophilic cell-cell adhesion                   | 2  | 19  | 0.3764191 | 3678 integrin, alpha 5 (fibronectin receptor, alpha polypeptide)              |
| GO heterophilic cell-cell adhesion                   | 2  | 19  | 0.3764191 | 57863 cell adhesion molecule 3                                                |

|                                        |   |     |           |                                                                             |
|----------------------------------------|---|-----|-----------|-----------------------------------------------------------------------------|
| GO collagen catabolic process          | 2 | 19  | 0.3764191 | 4316 matrix metallopeptidase 7 (matrilysin, uterine)                        |
| GO collagen catabolic process          | 2 | 19  | 0.3764191 | 56547 matrix metallopeptidase 26                                            |
| GO cadherin binding                    | 2 | 19  | 0.3764191 | 5025 purinergic receptor P2X, ligand-gated ion channel, 4                   |
| GO cadherin binding                    | 2 | 19  | 0.3764191 | 53827 FXYP domain containing ion transport regulator 5                      |
| GO photoreceptor outer segment         | 2 | 19  | 0.3764191 | 5132 phosducin                                                              |
| GO photoreceptor outer segment         | 2 | 19  | 0.3764191 | 5873 RAB27A, member RAS oncogene family                                     |
| GO regulation of synaptic plasticity   | 2 | 19  | 0.3764191 | 5327 plasminogen activator, tissue                                          |
| GO regulation of synaptic plasticity   | 2 | 19  | 0.3764191 | 627 brain-derived neurotrophic factor                                       |
| GO response to amino acid stimulus     | 2 | 19  | 0.3764191 | 6750 somatostatin                                                           |
| GO response to amino acid stimulus     | 2 | 19  | 0.3764191 | 8992 ATPase, H+ transporting, lysosomal 9kDa, V0 subunit e1                 |
| GO lipid transporter activity          | 2 | 19  | 0.3764191 | 80830 apolipoprotein L, 6                                                   |
| GO lipid transporter activity          | 2 | 19  | 0.3764191 | 80833 apolipoprotein L, 3                                                   |
| GO cell migration                      | 5 | 59  | 0.3776571 | 27035 NADPH oxidase 1                                                       |
| GO cell migration                      | 5 | 59  | 0.3776571 | 3911 laminin, alpha 5                                                       |
| GO cell migration                      | 5 | 59  | 0.3776571 | 57147 SCY1-like 3 ( <i>S. cerevisiae</i> )                                  |
| GO cell migration                      | 5 | 59  | 0.3776571 | 7049 transforming growth factor, beta receptor III                          |
| GO cell migration                      | 5 | 59  | 0.3776571 | 83666 poly (ADP-ribose) polymerase family, member 9                         |
| GO synaptic vesicle                    | 4 | 46  | 0.3860879 | 4886 neuropeptide Y receptor Y1                                             |
| GO synaptic vesicle                    | 4 | 46  | 0.3860879 | 6857 synaptotagmin I                                                        |
| GO synaptic vesicle                    | 4 | 46  | 0.3860879 | 9143 synaptogyrin 3                                                         |
| GO synaptic vesicle                    | 4 | 46  | 0.3860879 | 9892 synaptosomal-associated protein, 91kDa homolog (mouse)                 |
| GO protein complex assembly            | 8 | 101 | 0.3862097 | 10891 peroxisome proliferator-activated receptor gamma, coactivator 1 alpha |
| GO protein complex assembly            | 8 | 101 | 0.3862097 | 4194 Mdm4 p53 binding protein homolog (mouse)                               |
| GO protein complex assembly            | 8 | 101 | 0.3862097 | 5371 promyelocytic leukemia                                                 |
| GO protein complex assembly            | 8 | 101 | 0.3862097 | 56288 par-3 partitioning defective 3 homolog ( <i>C. elegans</i> )          |
| GO protein complex assembly            | 8 | 101 | 0.3862097 | 6850 spleen tyrosine kinase                                                 |
| GO protein complex assembly            | 8 | 101 | 0.3862097 | 7106 tetraspanin 4                                                          |
| GO protein complex assembly            | 8 | 101 | 0.3862097 | 8673 vesicle-associated membrane protein 8 (endobrevin)                     |
| GO protein complex assembly            | 8 | 101 | 0.3862097 | 9185 RALBP1 associated Eps domain containing 2                              |
| GO protein trimerization               | 1 | 7   | 0.3908275 | 10346 tripartite motif-containing 22                                        |
| GO adenosine deaminase activity        | 1 | 7   | 0.3908275 | 104 adenosine deaminase, RNA-specific, B1 (RED1 homolog rat)                |
| GO sodium:phosphate symporter activity | 1 | 7   | 0.3908275 | 10568 solute carrier family 34 (sodium phosphate), member 2                 |
| GO folic acid transport                | 1 | 7   | 0.3908275 | 113235 solute carrier family 46 (folate transporter), member 1              |
| GO long-chain fatty acid transport     | 1 | 7   | 0.3908275 | 123 perilipin 2                                                             |
| GO regulation of Cdc42 GTPase activity | 1 | 7   | 0.3908275 | 152273 FYVE, RhoGEF and PH domain containing 5                              |
| GO adrenoceptor activity               | 1 | 7   | 0.3908275 | 154 adrenergic, beta-2-, receptor, surface                                  |

|                                            |   |   |           |                                                                               |
|--------------------------------------------|---|---|-----------|-------------------------------------------------------------------------------|
| GO negative regulation of multicellular o  | 1 | 7 | 0.3908275 | 154 adrenergic, beta-2-, receptor, surface                                    |
| GO steroid hydroxylase activity            | 1 | 7 | 0.3908275 | 1559 cytochrome P450, family 2, subfamily C, polypeptide 9                    |
| GO ear development                         | 1 | 7 | 0.3908275 | 157506 retinol dehydrogenase 10 (all-trans)                                   |
| GO adenohypophysis development             | 1 | 7 | 0.3908275 | 1813 dopamine receptor D2                                                     |
| GO positive regulation of cholesterol est  | 1 | 7 | 0.3908275 | 183 angiotensinogen (serpin peptidase inhibitor, clade A, member 8)           |
| GO positive regulation of heart rate       | 1 | 7 | 0.3908275 | 1906 endothelin 1                                                             |
| GO ephrin receptor signaling pathway       | 1 | 7 | 0.3908275 | 1969 EPH receptor A2                                                          |
| GO positive regulation of proteolysis      | 1 | 7 | 0.3908275 | 2033 E1A binding protein p300                                                 |
| GO neurofilament cytoskeleton organiza     | 1 | 7 | 0.3908275 | 2055 ceroid-lipofuscinosis, neuronal 8 (epilepsy, progressive with mental ret |
| GO regulation of cell size                 | 1 | 7 | 0.3908275 | 2055 ceroid-lipofuscinosis, neuronal 8 (epilepsy, progressive with mental ret |
| GO surfactant homeostasis                  | 1 | 7 | 0.3908275 | 2066 v-erb-a erythroblastic leukemia viral oncogene homolog 4 (avian)         |
| GO histone H4-K12 acetylation              | 1 | 7 | 0.3908275 | 23338 PHD finger protein 15                                                   |
| GO MOZ/MORF histone acetyltransferas       | 1 | 7 | 0.3908275 | 23774 bromodomain containing 1                                                |
| GO alpha(1,3)-fucosyltransferase activity  | 1 | 7 | 0.3908275 | 2526 fucosyltransferase 4 (alpha (1,3) fucosyltransferase, myeloid-specific)  |
| GO negative regulation of catalytic activi | 1 | 7 | 0.3908275 | 255738 proprotein convertase subtilisin/kexin type 9                          |
| GO superoxide-generating NADPH oxidas      | 1 | 7 | 0.3908275 | 27035 NADPH oxidase 1                                                         |
| GO enteric nervous system development      | 1 | 7 | 0.3908275 | 3142 H2.0-like homeobox                                                       |
| GO regulation of cell-matrix adhesion      | 1 | 7 | 0.3908275 | 3175 one cut homeobox 1                                                       |
| GO prostate gland growth                   | 1 | 7 | 0.3908275 | 3479 insulin-like growth factor 1 (somatomedin C)                             |
| GO protein heterotetramerization           | 1 | 7 | 0.3908275 | 3643 insulin receptor                                                         |
| GO receptor clustering                     | 1 | 7 | 0.3908275 | 375790 agrin                                                                  |
| GO LRR domain binding                      | 1 | 7 | 0.3908275 | 3845 v-Ki-ras2 Kirsten rat sarcoma viral oncogene homolog                     |
| GO laminin-1 complex                       | 1 | 7 | 0.3908275 | 3911 laminin, alpha 5                                                         |
| GO type I transforming growth factor bet   | 1 | 7 | 0.3908275 | 4087 SMAD family member 2                                                     |
| GO sympathetic nervous system develop      | 1 | 7 | 0.3908275 | 429 achaete-scute complex homolog 1 (Drosophila)                              |
| GO nucleosome disassembly                  | 1 | 7 | 0.3908275 | 4778 nuclear factor (erythroid-derived 2), 45kDa                              |
| GO citrate metabolic process               | 1 | 7 | 0.3908275 | 48 aconitase 1, soluble                                                       |
| GO anagen                                  | 1 | 7 | 0.3908275 | 4851 Notch homolog 1, translocation-associated (Drosophila)                   |
| GO morphogenesis of an epithelial sheet    | 1 | 7 | 0.3908275 | 4853 Notch homolog 2 (Drosophila)                                             |
| GO death                                   | 1 | 7 | 0.3908275 | 4929 nuclear receptor subfamily 4, group A, member 2                          |
| GO neuron maturation                       | 1 | 7 | 0.3908275 | 4929 nuclear receptor subfamily 4, group A, member 2                          |
| GO extracellular ATP-gated cation chann    | 1 | 7 | 0.3908275 | 5025 purinergic receptor P2X, ligand-gated ion channel, 4                     |
| GO purinergic nucleotide receptor activit  | 1 | 7 | 0.3908275 | 5025 purinergic receptor P2X, ligand-gated ion channel, 4                     |
| GO glycoprotein metabolic process          | 1 | 7 | 0.3908275 | 5046 proprotein convertase subtilisin/kexin type 6                            |
| GO protein metabolic process               | 1 | 7 | 0.3908275 | 5071 Parkinson disease (autosomal recessive, juvenile) 2, parkin              |
| GO peptide biosynthetic process            | 1 | 7 | 0.3908275 | 5122 proprotein convertase subtilisin/kexin type 1                            |

|    |                                                                          |   |    |           |       |                                                                                   |
|----|--------------------------------------------------------------------------|---|----|-----------|-------|-----------------------------------------------------------------------------------|
| GO | semaphorin receptor activity                                             | 1 | 7  | 0.3908275 | 5362  | plexin A2                                                                         |
| GO | DNA damage response, signal transduction                                 | 1 | 7  | 0.3908275 | 5371  | promyelocytic leukemia                                                            |
| GO | protein K48-linked deubiquitination                                      | 1 | 7  | 0.3908275 | 55432 | YOD1 OTU deubiquinating enzyme 1 homolog ( <i>S. cerevisiae</i> )                 |
| GO | negative regulation of cell-matrix adhesion                              | 1 | 7  | 0.3908275 | 604   | B-cell CLL/lymphoma 6                                                             |
| GO | nerve development                                                        | 1 | 7  | 0.3908275 | 627   | brain-derived neurotrophic factor                                                 |
| GO | negative regulation of cell size                                         | 1 | 7  | 0.3908275 | 64798 | DEP domain containing 6                                                           |
| GO | glutamate binding                                                        | 1 | 7  | 0.3908275 | 6505  | solute carrier family 1 (neuronal/epithelial high affinity glutamate transporter) |
| GO | ankyrin binding                                                          | 1 | 7  | 0.3908275 | 6521  | solute carrier family 4, anion exchanger, member 1 (erythrocyte membrane)         |
| GO | nuclear hormone receptor binding                                         | 1 | 7  | 0.3908275 | 6604  | SWI/SNF related, matrix associated, actin dependent regulator of chromatin        |
| GO | dynein binding                                                           | 1 | 7  | 0.3908275 | 6622  | synuclein, alpha (non A4 component of amyloid precursor)                          |
| GO | synaptic transmission, dopaminergic                                      | 1 | 7  | 0.3908275 | 6622  | synuclein, alpha (non A4 component of amyloid precursor)                          |
| GO | synaptic vesicle endocytosis                                             | 1 | 7  | 0.3908275 | 6622  | synuclein, alpha (non A4 component of amyloid precursor)                          |
| GO | response to mercury ion                                                  | 1 | 7  | 0.3908275 | 682   | basigin (Ok blood group)                                                          |
| GO | positive regulation of alpha-beta T cell                                 | 1 | 7  | 0.3908275 | 6850  | spleen tyrosine kinase                                                            |
| GO | type II transforming growth factor beta                                  | 1 | 7  | 0.3908275 | 7049  | transforming growth factor, beta receptor III                                     |
| GO | erythrocyte maturation                                                   | 1 | 7  | 0.3908275 | 7076  | TIMP metalloproteinase inhibitor 1                                                |
| GO | positive regulation of interleukin-10 production                         | 1 | 7  | 0.3908275 | 7099  | toll-like receptor 4                                                              |
| GO | positive regulation of interleukin-8 binding                             | 1 | 7  | 0.3908275 | 7099  | toll-like receptor 4                                                              |
| GO | positive regulation of MHC class II binding                              | 1 | 7  | 0.3908275 | 7099  | toll-like receptor 4                                                              |
| GO | response to molecule of bacterial origin                                 | 1 | 7  | 0.3908275 | 7100  | toll-like receptor 5                                                              |
| GO | membrane attack complex                                                  | 1 | 7  | 0.3908275 | 731   | complement component 8, alpha polypeptide                                         |
| GO | AU-rich element binding                                                  | 1 | 7  | 0.3908275 | 7538  | zinc finger protein 36, C3H type, homolog (mouse)                                 |
| GO | developmental pigmentation                                               | 1 | 7  | 0.3908275 | 7546  | Zic family member 2 (odd-paired homolog, <i>Drosophila</i> )                      |
| GO | secretion                                                                | 1 | 7  | 0.3908275 | 760   | carbonic anhydrase II                                                             |
| GO | adult behavior                                                           | 1 | 7  | 0.3908275 | 8013  | nuclear receptor subfamily 4, group A, member 3                                   |
| GO | titin binding                                                            | 1 | 7  | 0.3908275 | 84033 | obscurin, cytoskeletal calmodulin and titin-interacting RhoGEF                    |
| GO | detection of mechanical stimulus involved in sensory perception of touch | 1 | 7  | 0.3908275 | 84059 | G protein-coupled receptor 98                                                     |
| GO | neurological system process                                              | 1 | 7  | 0.3908275 | 84059 | G protein-coupled receptor 98                                                     |
| GO | pentose-phosphate shunt                                                  | 1 | 7  | 0.3908275 | 9563  | hexose-6-phosphate dehydrogenase (glucose 1-dehydrogenase)                        |
| GO | positive regulation of cell-cell adhesion                                | 1 | 7  | 0.3908275 | 961   | CD47 molecule                                                                     |
| GO | response to lipid                                                        | 1 | 7  | 0.3908275 | 9619  | ATP-binding cassette, sub-family G (WHITE), member 1                              |
| GO | protein deacetylase activity                                             | 1 | 7  | 0.3908275 | 9734  | histone deacetylase 9                                                             |
| GO | mitochondrial outer membrane transport                                   | 1 | 7  | 0.3908275 | 9804  | translocase of outer mitochondrial membrane 20 homolog (yeast)                    |
| GO | clathrin coat assembly                                                   | 1 | 7  | 0.3908275 | 9892  | synaptosomal-associated protein, 91kDa homolog (mouse)                            |
| GO | sister chromatid cohesion                                                | 1 | 7  | 0.3908275 | 9985  | REC8 homolog (yeast)                                                              |
| GO | specific RNA polymerase II transcription                                 | 3 | 33 | 0.3945231 | 2353  | FBJ murine osteosarcoma viral oncogene homolog                                    |

|                                            |    |     |           |                                                                          |
|--------------------------------------------|----|-----|-----------|--------------------------------------------------------------------------|
| GO specific RNA polymerase II transcripti  | 3  | 33  | 0.3945231 | 3665 interferon regulatory factor 7                                      |
| GO specific RNA polymerase II transcripti  | 3  | 33  | 0.3945231 | 4212 Meis homeobox 2                                                     |
| GO endosome                                | 16 | 215 | 0.3992926 | 112 adenylate cyclase 6                                                  |
| GO endosome                                | 16 | 215 | 0.3992926 | 154 adrenergic, beta-2-, receptor, surface                               |
| GO endosome                                | 16 | 215 | 0.3992926 | 25825 beta-site APP-cleaving enzyme 2                                    |
| GO endosome                                | 16 | 215 | 0.3992926 | 2642 glucagon receptor                                                   |
| GO endosome                                | 16 | 215 | 0.3992926 | 3643 insulin receptor                                                    |
| GO endosome                                | 16 | 215 | 0.3992926 | 3775 potassium channel, subfamily K, member 1                            |
| GO endosome                                | 16 | 215 | 0.3992926 | 3949 low density lipoprotein receptor                                    |
| GO endosome                                | 16 | 215 | 0.3992926 | 412 steroid sulfatase (microsomal), isozyme S                            |
| GO endosome                                | 16 | 215 | 0.3992926 | 50617 ATPase, H+ transporting, lysosomal V0 subunit a4                   |
| GO endosome                                | 16 | 215 | 0.3992926 | 51272 blocked early in transport 1 homolog ( <i>S. cerevisiae</i> )-like |
| GO endosome                                | 16 | 215 | 0.3992926 | 55275 vacuolar protein sorting 53 homolog ( <i>S. cerevisiae</i> )       |
| GO endosome                                | 16 | 215 | 0.3992926 | 57132 chromatin modifying protein 1B                                     |
| GO endosome                                | 16 | 215 | 0.3992926 | 64083 golgi phosphoprotein 3 (coat-protein)                              |
| GO endosome                                | 16 | 215 | 0.3992926 | 7098 toll-like receptor 3                                                |
| GO endosome                                | 16 | 215 | 0.3992926 | 9182 Ras association (RalGDS/AF-6) domain family (N-terminal) member 9   |
| GO endosome                                | 16 | 215 | 0.3992926 | 9619 ATP-binding cassette, sub-family G (WHITE), member 1                |
| GO desmosome                               | 2  | 20  | 0.401252  | 11187 plakophilin 3                                                      |
| GO desmosome                               | 2  | 20  | 0.401252  | 5318 plakophilin 2                                                       |
| GO dendrite development                    | 2  | 20  | 0.401252  | 2182 acyl-CoA synthetase long-chain family member 4                      |
| GO dendrite development                    | 2  | 20  | 0.401252  | 627 brain-derived neurotrophic factor                                    |
| GO connexon complex                        | 2  | 20  | 0.401252  | 2706 gap junction protein, beta 2, 26kDa                                 |
| GO connexon complex                        | 2  | 20  | 0.401252  | 2707 gap junction protein, beta 3, 31kDa                                 |
| GO positive regulation of protein kinase I | 2  | 20  | 0.401252  | 3643 insulin receptor                                                    |
| GO positive regulation of protein kinase I | 2  | 20  | 0.401252  | 8600 tumor necrosis factor (ligand) superfamily, member 11               |
| GO response to radiation                   | 2  | 20  | 0.401252  | 3815 v-kit Hardy-Zuckerman 4 feline sarcoma viral oncogene homolog       |
| GO response to radiation                   | 2  | 20  | 0.401252  | 8600 tumor necrosis factor (ligand) superfamily, member 11               |
| GO neural crest cell migration             | 2  | 20  | 0.401252  | 3911 laminin, alpha 5                                                    |
| GO neural crest cell migration             | 2  | 20  | 0.401252  | 4254 KIT ligand                                                          |
| GO phosphate metabolic process             | 2  | 20  | 0.401252  | 5787 protein tyrosine phosphatase, receptor type, B                      |
| GO phosphate metabolic process             | 2  | 20  | 0.401252  | 5789 protein tyrosine phosphatase, receptor type, D                      |
| GO neuron differentiation                  | 4  | 47  | 0.4018871 | 1969 EPH receptor A2                                                     |
| GO neuron differentiation                  | 4  | 47  | 0.4018871 | 255738 proprotein convertase subtilisin/kexin type 9                     |
| GO neuron differentiation                  | 4  | 47  | 0.4018871 | 2624 GATA binding protein 2                                              |
| GO neuron differentiation                  | 4  | 47  | 0.4018871 | 5801 protein tyrosine phosphatase, receptor type, R                      |

|                                        |    |     |           |                                                                |
|----------------------------------------|----|-----|-----------|----------------------------------------------------------------|
| GO exocytosis                          | 4  | 47  | 0.4018871 | 2642 glucagon receptor                                         |
| GO exocytosis                          | 4  | 47  | 0.4018871 | 375056 melanoma inhibitory activity family, member 3           |
| GO exocytosis                          | 4  | 47  | 0.4018871 | 3993 lethal giant larvae homolog 2 (Drosophila)                |
| GO exocytosis                          | 4  | 47  | 0.4018871 | 5873 RAB27A, member RAS oncogene family                        |
| GO response to heat                    | 4  | 47  | 0.4018871 | 4842 nitric oxide synthase 1 (neuronal)                        |
| GO response to heat                    | 4  | 47  | 0.4018871 | 6750 somatostatin                                              |
| GO response to heat                    | 4  | 47  | 0.4018871 | 9021 suppressor of cytokine signaling 3                        |
| GO response to heat                    | 4  | 47  | 0.4018871 | 929 CD14 molecule                                              |
| GO protein domain specific binding     | 9  | 117 | 0.4068898 | 1822 atrophin 1                                                |
| GO protein domain specific binding     | 9  | 117 | 0.4068898 | 399694 SHC (Src homology 2 domain containing) family, member 4 |
| GO protein domain specific binding     | 9  | 117 | 0.4068898 | 4204 methyl CpG binding protein 2 (Rett syndrome)              |
| GO protein domain specific binding     | 9  | 117 | 0.4068898 | 5465 peroxisome proliferator-activated receptor alpha          |
| GO protein domain specific binding     | 9  | 117 | 0.4068898 | 5577 protein kinase, cAMP-dependent, regulatory, type II, beta |
| GO protein domain specific binding     | 9  | 117 | 0.4068898 | 57132 chromatin modifying protein 1B                           |
| GO protein domain specific binding     | 9  | 117 | 0.4068898 | 57524 CASK interacting protein 1                               |
| GO protein domain specific binding     | 9  | 117 | 0.4068898 | 6850 spleen tyrosine kinase                                    |
| GO protein domain specific binding     | 9  | 117 | 0.4068898 | 8660 insulin receptor substrate 2                              |
| GO positive regulation of cell growth  | 3  | 34  | 0.4133202 | 1839 heparin-binding EGF-like growth factor                    |
| GO positive regulation of cell growth  | 3  | 34  | 0.4133202 | 3484 insulin-like growth factor binding protein 1              |
| GO positive regulation of cell growth  | 3  | 34  | 0.4133202 | 952 CD38 molecule                                              |
| GO platelet alpha granule lumen        | 3  | 34  | 0.4133202 | 2153 coagulation factor V (proaccelerin, labile factor)        |
| GO platelet alpha granule lumen        | 3  | 34  | 0.4133202 | 22915 multimerin 1                                             |
| GO platelet alpha granule lumen        | 3  | 34  | 0.4133202 | 3479 insulin-like growth factor 1 (somatomedin C)              |
| GO receptor signaling protein activity | 3  | 34  | 0.4133202 | 23767 fibronectin leucine rich transmembrane protein 3         |
| GO receptor signaling protein activity | 3  | 34  | 0.4133202 | 573 BCL2-associated athanogene                                 |
| GO receptor signaling protein activity | 3  | 34  | 0.4133202 | 8519 interferon induced transmembrane protein 1 (9-27)         |
| GO presynaptic membrane                | 3  | 34  | 0.4133202 | 2911 glutamate receptor, metabotropic 1                        |
| GO presynaptic membrane                | 3  | 34  | 0.4133202 | 6857 synaptotagmin I                                           |
| GO presynaptic membrane                | 3  | 34  | 0.4133202 | 9892 synaptosomal-associated protein, 91kDa homolog (mouse)    |
| GO visual perception                   | 14 | 189 | 0.417461  | 157506 retinol dehydrogenase 10 (all-trans)                    |
| GO visual perception                   | 14 | 189 | 0.417461  | 23418 crumbs homolog 1 (Drosophila)                            |
| GO visual perception                   | 14 | 189 | 0.417461  | 368 ATP-binding cassette, sub-family C (CFTR/MRP), member 6    |
| GO visual perception                   | 14 | 189 | 0.417461  | 3983 actin binding LIM protein 1                               |
| GO visual perception                   | 14 | 189 | 0.417461  | 5132 phosducin                                                 |
| GO visual perception                   | 14 | 189 | 0.417461  | 5158 phosphodiesterase 6B, cGMP-specific, rod, beta            |
| GO visual perception                   | 14 | 189 | 0.417461  | 6004 regulator of G-protein signaling 16                       |



|    |                                                       |    |     |           |                                                                    |
|----|-------------------------------------------------------|----|-----|-----------|--------------------------------------------------------------------|
| GO | visual perception                                     | 14 | 189 | 0.417461  | 6096 RAR-related orphan receptor B                                 |
| GO | visual perception                                     | 14 | 189 | 0.417461  | 6101 retinitis pigmentosa 1 (autosomal dominant)                   |
| GO | visual perception                                     | 14 | 189 | 0.417461  | 783 calcium channel, voltage-dependent, beta 2 subunit             |
| GO | visual perception                                     | 14 | 189 | 0.417461  | 83394 PTPN11 family member 3                                       |
| GO | visual perception                                     | 14 | 189 | 0.417461  | 83872 hemicentin 1                                                 |
| GO | visual perception                                     | 14 | 189 | 0.417461  | 8842 prominin 1                                                    |
| GO | visual perception                                     | 14 | 189 | 0.417461  | 93589 calcium channel, voltage-dependent, alpha 2/delta subunit 4  |
| GO | serine-type peptidase activity                        | 4  | 48  | 0.4176107 | 10942 protease, serine, 21 (testisin)                              |
| GO | serine-type peptidase activity                        | 4  | 48  | 0.4176107 | 1803 dipeptidyl-peptidase 4                                        |
| GO | serine-type peptidase activity                        | 4  | 48  | 0.4176107 | 5655 kallikrein-related peptidase 10                               |
| GO | serine-type peptidase activity                        | 4  | 48  | 0.4176107 | 715 complement component 1, r subcomponent                         |
| GO | integrin binding                                      | 5  | 62  | 0.4191132 | 10085 EGF-like repeats and discoidin I-like domains 3              |
| GO | integrin binding                                      | 5  | 62  | 0.4191132 | 10516 fibulin 5                                                    |
| GO | integrin binding                                      | 5  | 62  | 0.4191132 | 3678 integrin, alpha 5 (fibronectin receptor, alpha polypeptide)   |
| GO | integrin binding                                      | 5  | 62  | 0.4191132 | 3911 laminin, alpha 5                                              |
| GO | integrin binding                                      | 5  | 62  | 0.4191132 | 6850 spleen tyrosine kinase                                        |
| GO | ATPase activity, coupled to transmembrane transport   | 2  | 21  | 0.4256062 | 148229 ATPase, class I, type 8B, member 3                          |
| GO | ATPase activity, coupled to transmembrane transport   | 2  | 21  | 0.4256062 | 79895 ATPase, class I, type 8B, member 4                           |
| GO | aromatase activity                                    | 2  | 21  | 0.4256062 | 1558 cytochrome P450, family 2, subfamily C, polypeptide 8         |
| GO | aromatase activity                                    | 2  | 21  | 0.4256062 | 1577 cytochrome P450, family 3, subfamily A, polypeptide 5         |
| GO | negative regulation of caspase activation             | 2  | 21  | 0.4256062 | 3164 nuclear receptor subfamily 4, group A, member 1               |
| GO | negative regulation of caspase activation             | 2  | 21  | 0.4256062 | 6622 synuclein, alpha (non A4 component of amyloid precursor)      |
| GO | regulation of multicellular organism growth           | 2  | 21  | 0.4256062 | 3479 insulin-like growth factor 1 (somatomedin C)                  |
| GO | regulation of multicellular organism growth           | 2  | 21  | 0.4256062 | 4886 neuropeptide Y receptor Y1                                    |
| GO | defense response to virus                             | 2  | 21  | 0.4256062 | 3569 interleukin 6 (interferon, beta 2)                            |
| GO | defense response to virus                             | 2  | 21  | 0.4256062 | 7098 toll-like receptor 3                                          |
| GO | release of cytochrome c from mitochondria             | 2  | 21  | 0.4256062 | 3725 jun oncogene                                                  |
| GO | release of cytochrome c from mitochondria             | 2  | 21  | 0.4256062 | 885 cholecystokinin                                                |
| GO | positive regulation of mesenchymal cell proliferation | 2  | 21  | 0.4256062 | 5396 paired related homeobox 1                                     |
| GO | positive regulation of mesenchymal cell proliferation | 2  | 21  | 0.4256062 | 8660 insulin receptor substrate 2                                  |
| GO | sensory perception of sound                           | 7  | 91  | 0.4301987 | 10253 sprouty homolog 2 (Drosophila)                               |
| GO | sensory perception of sound                           | 7  | 91  | 0.4301987 | 2706 gap junction protein, beta 2, 26kDa                           |
| GO | sensory perception of sound                           | 7  | 91  | 0.4301987 | 2707 gap junction protein, beta 3, 31kDa                           |
| GO | sensory perception of sound                           | 7  | 91  | 0.4301987 | 50617 ATPase, H <sup>+</sup> transporting, lysosomal V0 subunit a4 |
| GO | sensory perception of sound                           | 7  | 91  | 0.4301987 | 51168 myosin XVA                                                   |
| GO | sensory perception of sound                           | 7  | 91  | 0.4301987 | 53405 chloride intracellular channel 5                             |

|                                                   |    |     |           |                                                                             |
|---------------------------------------------------|----|-----|-----------|-----------------------------------------------------------------------------|
| GO sensory perception of sound                    | 7  | 91  | 0.4301987 | 84059 G protein-coupled receptor 98                                         |
| GO induction of apoptosis by extracellular        | 7  | 91  | 0.4301987 | 1612 death-associated protein kinase 1                                      |
| GO induction of apoptosis by extracellular        | 7  | 91  | 0.4301987 | 23263 MCF.2 cell line derived transforming sequence-like                    |
| GO induction of apoptosis by extracellular        | 7  | 91  | 0.4301987 | 23365 Rho guanine nucleotide exchange factor (GEF) 12                       |
| GO induction of apoptosis by extracellular        | 7  | 91  | 0.4301987 | 3429 interferon, alpha-inducible protein 27                                 |
| GO induction of apoptosis by extracellular        | 7  | 91  | 0.4301987 | 84033 obscurin, cytoskeletal calmodulin and titin-interacting RhoGEF        |
| GO induction of apoptosis by extracellular        | 7  | 91  | 0.4301987 | 9459 Rac/Cdc42 guanine nucleotide exchange factor (GEF) 6                   |
| GO induction of apoptosis by extracellular        | 7  | 91  | 0.4301987 | 952 CD38 molecule                                                           |
| GO negative regulation of transcription           | 11 | 148 | 0.431903  | 10076 protein tyrosine phosphatase, receptor type, U                        |
| GO negative regulation of transcription           | 11 | 148 | 0.431903  | 127343 diencephalon/mesencephalon homeobox 1                                |
| GO negative regulation of transcription           | 11 | 148 | 0.431903  | 2122 MDS1 and EVI1 complex locus                                            |
| GO negative regulation of transcription           | 11 | 148 | 0.431903  | 2737 GLI family zinc finger 3                                               |
| GO negative regulation of transcription           | 11 | 148 | 0.431903  | 3400 inhibitor of DNA binding 4, dominant negative helix-loop-helix protein |
| GO negative regulation of transcription           | 11 | 148 | 0.431903  | 4204 methyl CpG binding protein 2 (Rett syndrome)                           |
| GO negative regulation of transcription           | 11 | 148 | 0.431903  | 5187 period homolog 1 (Drosophila)                                          |
| GO negative regulation of transcription           | 11 | 148 | 0.431903  | 5371 promyelocytic leukemia                                                 |
| GO negative regulation of transcription           | 11 | 148 | 0.431903  | 652 bone morphogenetic protein 4                                            |
| GO negative regulation of transcription           | 11 | 148 | 0.431903  | 84911 zinc finger protein 382                                               |
| GO negative regulation of transcription           | 11 | 148 | 0.431903  | 9734 histone deacetylase 9                                                  |
| GO transmembrane receptor protein tyrosine kinase | 3  | 35  | 0.4319277 | 1969 EPH receptor A2                                                        |
| GO transmembrane receptor protein tyrosine kinase | 3  | 35  | 0.4319277 | 2066 v-erb-a erythroblastic leukemia viral oncogene homolog 4 (avian)       |
| GO transmembrane receptor protein tyrosine kinase | 3  | 35  | 0.4319277 | 4915 neurotrophic tyrosine kinase, receptor, type 2                         |
| GO acute-phase response                           | 3  | 35  | 0.4319277 | 23780 apolipoprotein L, 2                                                   |
| GO acute-phase response                           | 3  | 35  | 0.4319277 | 3569 interleukin 6 (interferon, beta 2)                                     |
| GO acute-phase response                           | 3  | 35  | 0.4319277 | 3570 interleukin 6 receptor                                                 |
| GO excretion                                      | 3  | 35  | 0.4319277 | 50617 ATPase, H+ transporting, lysosomal V0 subunit a4                      |
| GO excretion                                      | 3  | 35  | 0.4319277 | 81693 amnionless homolog (mouse)                                            |
| GO excretion                                      | 3  | 35  | 0.4319277 | 8645 potassium channel, subfamily K, member 5                               |
| GO U12-type spliceosomal complex                  | 1  | 8   | 0.4324787 | 10081 programmed cell death 7                                               |
| GO poly(A) RNA binding                            | 1  | 8   | 0.4324787 | 11030 RNA binding protein with multiple splicing                            |
| GO creatine metabolic process                     | 1  | 8   | 0.4324787 | 1152 creatine kinase, brain                                                 |
| GO triglyceride catabolic process                 | 1  | 8   | 0.4324787 | 1373 carbamoyl-phosphate synthetase 1, mitochondrial                        |
| GO retinoid binding                               | 1  | 8   | 0.4324787 | 1382 cellular retinoic acid binding protein 2                               |
| GO positive regulation of cell-matrix adhesion    | 1  | 8   | 0.4324787 | 1435 colony stimulating factor 1 (macrophage)                               |
| GO regulation of catalytic activity               | 1  | 8   | 0.4324787 | 1508 cathepsin B                                                            |
| GO small GTPase binding                           | 1  | 8   | 0.4324787 | 152273 FYVE, RhoGEF and PH domain containing 5                              |

|                                                           |   |   |           |                                                                                     |
|-----------------------------------------------------------|---|---|-----------|-------------------------------------------------------------------------------------|
| GO sexual reproduction                                    | 1 | 8 | 0.4324787 | 158800 Rhox homeobox family, member 1                                               |
| GO negative regulation of protein kinase                  | 1 | 8 | 0.4324787 | 1813 dopamine receptor D2                                                           |
| GO prepulse inhibition                                    | 1 | 8 | 0.4324787 | 1813 dopamine receptor D2                                                           |
| GO dopamine receptor signaling pathway                    | 1 | 8 | 0.4324787 | 1815 dopamine receptor D4                                                           |
| GO response to salt stress                                | 1 | 8 | 0.4324787 | 183 angiotensinogen (serpin peptidase inhibitor, clade A, member 8)                 |
| GO non-membrane spanning protein tyrosine kinase activity | 1 | 8 | 0.4324787 | 1843 dual specificity phosphatase 1                                                 |
| GO ephrin receptor binding                                | 1 | 8 | 0.4324787 | 1948 ephrin-B2                                                                      |
| GO tail morphogenesis                                     | 1 | 8 | 0.4324787 | 1969 EPH receptor A2                                                                |
| GO protein-DNA complex                                    | 1 | 8 | 0.4324787 | 2033 E1A binding protein p300                                                       |
| GO adenylate kinase activity                              | 1 | 8 | 0.4324787 | 205 adenylate kinase 3-like 1                                                       |
| GO GABA receptor binding                                  | 1 | 8 | 0.4324787 | 22906 trafficking protein, kinesin binding 1                                        |
| GO histone H4-K16 acetylation                             | 1 | 8 | 0.4324787 | 23338 PHD finger protein 15                                                         |
| GO clathrin binding                                       | 1 | 8 | 0.4324787 | 26119 low density lipoprotein receptor adaptor protein 1                            |
| GO protein homotrimerization                              | 1 | 8 | 0.4324787 | 286133 scavenger receptor class A, member 5 (putative)                              |
| GO tumor necrosis factor-mediated signaling pathway       | 1 | 8 | 0.4324787 | 29108 PYD and CARD domain containing                                                |
| GO protein destabilization                                | 1 | 8 | 0.4324787 | 29116 myosin regulatory light chain interacting protein                             |
| GO histidine catabolic process                            | 1 | 8 | 0.4324787 | 3034 histidine ammonia-lyase                                                        |
| GO antigen processing and presentation                    | 1 | 8 | 0.4324787 | 3134 major histocompatibility complex, class I, F                                   |
| GO positive regulation of JAK-STAT cascade                | 1 | 8 | 0.4324787 | 3569 interleukin 6 (interferon, beta 2)                                             |
| GO male sex determination                                 | 1 | 8 | 0.4324787 | 3643 insulin receptor                                                               |
| GO synapse organization                                   | 1 | 8 | 0.4324787 | 375790 agrin                                                                        |
| GO epithelial cell proliferation                          | 1 | 8 | 0.4324787 | 3815 v-kit Hardy-Zuckerman 4 feline sarcoma viral oncogene homolog                  |
| GO intestinal cholesterol absorption                      | 1 | 8 | 0.4324787 | 3949 low density lipoprotein receptor                                               |
| GO embryonic hemopoiesis                                  | 1 | 8 | 0.4324787 | 4005 LIM domain only 2 (rhombotin-like 1)                                           |
| GO co-SMAD binding                                        | 1 | 8 | 0.4324787 | 4087 SMAD family member 2                                                           |
| GO SMAD protein complex assembly                          | 1 | 8 | 0.4324787 | 4087 SMAD family member 2                                                           |
| GO neurotransmitter catabolic process                     | 1 | 8 | 0.4324787 | 4128 monoamine oxidase A                                                            |
| GO heterochromatin                                        | 1 | 8 | 0.4324787 | 4204 methyl CpG binding protein 2 (Rett syndrome)                                   |
| GO response to lithium ion                                | 1 | 8 | 0.4324787 | 429 achaete-scute complex homolog 1 (Drosophila)                                    |
| GO hemostasis                                             | 1 | 8 | 0.4324787 | 4778 nuclear factor (erythroid-derived 2), 45kDa                                    |
| GO nuclear localization sequence binding                  | 1 | 8 | 0.4324787 | 4792 nuclear factor of kappa light polypeptide gene enhancer in B-cells inhibitor 3 |
| GO positive regulation of cholesterol efflux              | 1 | 8 | 0.4324787 | 4792 nuclear factor of kappa light polypeptide gene enhancer in B-cells inhibitor 3 |
| GO arginine catabolic process                             | 1 | 8 | 0.4324787 | 4842 nitric oxide synthase 1 (neuronal)                                             |
| GO central nervous system projection neuron development   | 1 | 8 | 0.4324787 | 4929 nuclear receptor subfamily 4, group A, member 2                                |
| GO hydrogen-exporting ATPase activity, lysosomal          | 1 | 8 | 0.4324787 | 50617 ATPase, H+ transporting, lysosomal V0 subunit a4                              |
| GO phospholipase inhibitor activity                       | 1 | 8 | 0.4324787 | 5132 phosducin                                                                      |

|                                                           |   |    |           |                                                                                        |
|-----------------------------------------------------------|---|----|-----------|----------------------------------------------------------------------------------------|
| GO response to sucrose stimulus                           | 1 | 8  | 0.4324787 | 51703 acyl-CoA synthetase long-chain family member 5                                   |
| GO cyclin binding                                         | 1 | 8  | 0.4324787 | 5218 cyclin-dependent kinase 14                                                        |
| GO pharyngeal system development                          | 1 | 8  | 0.4324787 | 5362 plexin A2                                                                         |
| GO RNA polymerase II transcription elongation factor 1    | 1 | 8  | 0.4324787 | 55140 elongation protein 3 homolog ( <i>S. cerevisiae</i> )                            |
| GO transferase activity, transferring nitrogen            | 1 | 8  | 0.4324787 | 55304 serine palmitoyltransferase, long chain base subunit 3                           |
| GO protein K63-linked deubiquitination                    | 1 | 8  | 0.4324787 | 55432 YOD1 OTU deubiquinating enzyme 1 homolog ( <i>S. cerevisiae</i> )                |
| GO sodium:dicarboxylate symporter activity                | 1 | 8  | 0.4324787 | 6505 solute carrier family 1 (neuronal/epithelial high affinity glutamate transporter) |
| GO hemopoietic progenitor cell differentiation            | 1 | 8  | 0.4324787 | 652 bone morphogenetic protein 4                                                       |
| GO membrane-bounded vesicle                               | 1 | 8  | 0.4324787 | 652 bone morphogenetic protein 4                                                       |
| GO protein localization in nucleus                        | 1 | 8  | 0.4324787 | 652 bone morphogenetic protein 4                                                       |
| GO SNARE binding                                          | 1 | 8  | 0.4324787 | 6812 syntaxin binding protein 1                                                        |
| GO antioxidant activity                                   | 1 | 8  | 0.4324787 | 7001 peroxiredoxin 2                                                                   |
| GO immunoglobulin mediated immune response                | 1 | 8  | 0.4324787 | 7099 toll-like receptor 4                                                              |
| GO cellular protein localization                          | 1 | 8  | 0.4324787 | 7474 wingless-type MMTV integration site family, member 5A                             |
| GO diacylglycerol binding                                 | 1 | 8  | 0.4324787 | 8527 diacylglycerol kinase, delta 130kDa                                               |
| GO intrinsic to membrane                                  | 1 | 8  | 0.4324787 | 8542 apolipoprotein L, 1                                                               |
| GO transmembrane receptor protein serine/threonine kinase | 1 | 8  | 0.4324787 | 91 activin A receptor, type IB                                                         |
| GO phosphatidylcholine binding                            | 1 | 8  | 0.4324787 | 91404 SEC14 and spectrin domains 1                                                     |
| GO negative regulation of bone resorption                 | 1 | 8  | 0.4324787 | 952 CD38 molecule                                                                      |
| GO amyloid precursor protein catabolic process            | 1 | 8  | 0.4324787 | 9619 ATP-binding cassette, sub-family G (WHITE), member 1                              |
| GO actin monomer binding                                  | 1 | 8  | 0.4324787 | 9788 metastasis suppressor 1                                                           |
| GO cell redox homeostasis                                 | 5 | 63 | 0.432841  | 1193 chloride intracellular channel 2                                                  |
| GO cell redox homeostasis                                 | 5 | 63 | 0.432841  | 51314 thioredoxin domain containing 3 (spermatzoa)                                     |
| GO cell redox homeostasis                                 | 5 | 63 | 0.432841  | 5768 quiescin Q6 sulfhydryl oxidase 1                                                  |
| GO cell redox homeostasis                                 | 5 | 63 | 0.432841  | 64359 nucleoredoxin                                                                    |
| GO PDZ domain binding                                     | 4 | 49 | 0.4332369 | 7001 peroxiredoxin 2                                                                   |
| GO PDZ domain binding                                     | 4 | 49 | 0.4332369 | 1080 cystic fibrosis transmembrane conductance regulator (ATP-binding cassette)        |
| GO PDZ domain binding                                     | 4 | 49 | 0.4332369 | 5071 Parkinson disease (autosomal recessive, juvenile) 2, parkin                       |
| GO PDZ domain binding                                     | 4 | 49 | 0.4332369 | 7049 transforming growth factor, beta receptor III                                     |
| GO caveola                                                | 4 | 49 | 0.4332369 | 9722 nitric oxide synthase 1 (neuronal) adaptor protein                                |
| GO caveola                                                | 4 | 49 | 0.4332369 | 1508 cathepsin B                                                                       |
| GO caveola                                                | 4 | 49 | 0.4332369 | 2066 v-erb-a erythroblastic leukemia viral oncogene homolog 4 (avian)                  |
| GO caveola                                                | 4 | 49 | 0.4332369 | 3643 insulin receptor                                                                  |
| GO response to unfolded protein                           | 4 | 49 | 0.4332369 | 3949 low density lipoprotein receptor                                                  |
| GO response to unfolded protein                           | 4 | 49 | 0.4332369 | 26270 F-box protein 6                                                                  |
| GO response to unfolded protein                           | 4 | 49 | 0.4332369 | 3306 heat shock 70kDa protein 2                                                        |

|    |                                       |    |     |           |                                                                           |
|----|---------------------------------------|----|-----|-----------|---------------------------------------------------------------------------|
| GO | response to unfolded protein          | 4  | 49  | 0.4332369 | 55432 YOD1 OTU deubiquinating enzyme 1 homolog ( <i>S. cerevisiae</i> )   |
| GO | response to unfolded protein          | 4  | 49  | 0.4332369 | 90993 cAMP responsive element binding protein 3-like 1                    |
| GO | protein serine/threonine kinase activ | 24 | 335 | 0.4358063 | 10769 polo-like kinase 2 ( <i>Drosophila</i> )                            |
| GO | protein serine/threonine kinase activ | 24 | 335 | 0.4358063 | 11200 CHK2 checkpoint homolog ( <i>S. pombe</i> )                         |
| GO | protein serine/threonine kinase activ | 24 | 335 | 0.4358063 | 11213 interleukin-1 receptor-associated kinase 3                          |
| GO | protein serine/threonine kinase activ | 24 | 335 | 0.4358063 | 127933 U2AF homology motif (UHM) kinase 1                                 |
| GO | protein serine/threonine kinase activ | 24 | 335 | 0.4358063 | 130399 activin A receptor, type IC                                        |
| GO | protein serine/threonine kinase activ | 24 | 335 | 0.4358063 | 140901 serine/threonine kinase 35                                         |
| GO | protein serine/threonine kinase activ | 24 | 335 | 0.4358063 | 150094 salt-inducible kinase 1                                            |
| GO | protein serine/threonine kinase activ | 24 | 335 | 0.4358063 | 1612 death-associated protein kinase 1                                    |
| GO | protein serine/threonine kinase activ | 24 | 335 | 0.4358063 | 23043 TRAF2 and NCK interacting kinase                                    |
| GO | protein serine/threonine kinase activ | 24 | 335 | 0.4358063 | 23387 SIK family kinase 3                                                 |
| GO | protein serine/threonine kinase activ | 24 | 335 | 0.4358063 | 28996 homeodomain interacting protein kinase 2                            |
| GO | protein serine/threonine kinase activ | 24 | 335 | 0.4358063 | 375449 microtubule associated serine/threonine kinase family member 4     |
| GO | protein serine/threonine kinase activ | 24 | 335 | 0.4358063 | 415116 pim-3 oncogene                                                     |
| GO | protein serine/threonine kinase activ | 24 | 335 | 0.4358063 | 4293 mitogen-activated protein kinase kinase kinase 9                     |
| GO | protein serine/threonine kinase activ | 24 | 335 | 0.4358063 | 5063 p21 protein (Cdc42/Rac)-activated kinase 3                           |
| GO | protein serine/threonine kinase activ | 24 | 335 | 0.4358063 | 5129 cyclin-dependent kinase 18                                           |
| GO | protein serine/threonine kinase activ | 24 | 335 | 0.4358063 | 5608 mitogen-activated protein kinase kinase 6                            |
| GO | protein serine/threonine kinase activ | 24 | 335 | 0.4358063 | 6446 serum/glucocorticoid regulated kinase 1                              |
| GO | protein serine/threonine kinase activ | 24 | 335 | 0.4358063 | 81788 NUAK family, SNF1-like kinase, 2                                    |
| GO | protein serine/threonine kinase activ | 24 | 335 | 0.4358063 | 84033 obscurin, cytoskeletal calmodulin and titin-interacting RhoGEF      |
| GO | protein serine/threonine kinase activ | 24 | 335 | 0.4358063 | 9064 mitogen-activated protein kinase kinase kinase 6                     |
| GO | protein serine/threonine kinase activ | 24 | 335 | 0.4358063 | 91 activin A receptor, type IB                                            |
| GO | protein serine/threonine kinase activ | 24 | 335 | 0.4358063 | 9263 serine/threonine kinase 17a                                          |
| GO | protein serine/threonine kinase activ | 24 | 335 | 0.4358063 | 94 activin A receptor type II-like 1                                      |
| GO | nuclear envelope                      | 7  | 92  | 0.4415374 | 240 arachidonate 5-lipoxygenase                                           |
| GO | nuclear envelope                      | 7  | 92  | 0.4415374 | 311 annexin A11                                                           |
| GO | nuclear envelope                      | 7  | 92  | 0.4415374 | 4056 leukotriene C4 synthase                                              |
| GO | nuclear envelope                      | 7  | 92  | 0.4415374 | 412 steroid sulfatase (microsomal), isozyme S                             |
| GO | nuclear envelope                      | 7  | 92  | 0.4415374 | 54894 ring finger protein 43                                              |
| GO | nuclear envelope                      | 7  | 92  | 0.4415374 | 5742 prostaglandin-endoperoxide synthase 1 (prostaglandin G/H synthase a) |
| GO | nuclear envelope                      | 7  | 92  | 0.4415374 | 93273 LEM domain containing 1                                             |
| GO | protein tyrosine kinase activity      | 6  | 78  | 0.4440413 | 2263 fibroblast growth factor receptor 2                                  |
| GO | protein tyrosine kinase activity      | 6  | 78  | 0.4440413 | 3643 insulin receptor                                                     |
| GO | protein tyrosine kinase activity      | 6  | 78  | 0.4440413 | 3815 v-kit Hardy-Zuckerman 4 feline sarcoma viral oncogene homolog        |

|    |                                       |    |     |           |        |                                                                          |
|----|---------------------------------------|----|-----|-----------|--------|--------------------------------------------------------------------------|
| GO | protein tyrosine kinase activity      | 6  | 78  | 0.4440413 | 5608   | mitogen-activated protein kinase kinase 6                                |
| GO | protein tyrosine kinase activity      | 6  | 78  | 0.4440413 | 6850   | spleen tyrosine kinase                                                   |
| GO | protein tyrosine kinase activity      | 6  | 78  | 0.4440413 | 84033  | obscurin, cytoskeletal calmodulin and titin-interacting RhoGEF           |
| GO | hormone-mediated signaling pathwa     | 4  | 50  | 0.4487451 | 112    | adenylate cyclase 6                                                      |
| GO | hormone-mediated signaling pathwa     | 4  | 50  | 0.4487451 | 2642   | glucagon receptor                                                        |
| GO | hormone-mediated signaling pathwa     | 4  | 50  | 0.4487451 | 5577   | protein kinase, cAMP-dependent, regulatory, type II, beta                |
| GO | hormone-mediated signaling pathwa     | 4  | 50  | 0.4487451 | 5972   | renin                                                                    |
| GO | small GTPase mediated signal transd   | 14 | 193 | 0.4487475 | 115273 | RAB42, member RAS oncogene family                                        |
| GO | small GTPase mediated signal transd   | 14 | 193 | 0.4487475 | 23179  | ral guanine nucleotide dissociation stimulator-like 1                    |
| GO | small GTPase mediated signal transd   | 14 | 193 | 0.4487475 | 23682  | RAB38, member RAS oncogene family                                        |
| GO | small GTPase mediated signal transd   | 14 | 193 | 0.4487475 | 25837  | RAB26, member RAS oncogene family                                        |
| GO | small GTPase mediated signal transd   | 14 | 193 | 0.4487475 | 379    | ADP-ribosylation factor-like 4D                                          |
| GO | small GTPase mediated signal transd   | 14 | 193 | 0.4487475 | 3845   | v-Ki-ras2 Kirsten rat sarcoma viral oncogene homolog                     |
| GO | small GTPase mediated signal transd   | 14 | 193 | 0.4487475 | 387496 | RAS-like, family 11, member A                                            |
| GO | small GTPase mediated signal transd   | 14 | 193 | 0.4487475 | 51285  | RAS-like, family 12                                                      |
| GO | small GTPase mediated signal transd   | 14 | 193 | 0.4487475 | 51655  | RAS, dexamethasone-induced 1                                             |
| GO | small GTPase mediated signal transd   | 14 | 193 | 0.4487475 | 54769  | DIRAS family, GTP-binding RAS-like 2                                     |
| GO | small GTPase mediated signal transd   | 14 | 193 | 0.4487475 | 57799  | RAB40C, member RAS oncogene family                                       |
| GO | small GTPase mediated signal transd   | 14 | 193 | 0.4487475 | 5873   | RAB27A, member RAS oncogene family                                       |
| GO | small GTPase mediated signal transd   | 14 | 193 | 0.4487475 | 5900   | ral guanine nucleotide dissociation stimulator                           |
| GO | small GTPase mediated signal transd   | 14 | 193 | 0.4487475 | 85004  | RAS-like, estrogen-regulated, growth inhibitor                           |
| GO | microvillus                           | 2  | 22  | 0.449431  | 1080   | cystic fibrosis transmembrane conductance regulator (ATP-binding cas:    |
| GO | microvillus                           | 2  | 22  | 0.449431  | 760    | carbonic anhydrase II                                                    |
| GO | calcium-independent cell-cell adhesio | 2  | 22  | 0.449431  | 1364   | claudin 4                                                                |
| GO | calcium-independent cell-cell adhesio | 2  | 22  | 0.449431  | 9071   | claudin 10                                                               |
| GO | photoreceptor cell maintenance        | 2  | 22  | 0.449431  | 2055   | ceroid-lipofuscinosis, neuronal 8 (epilepsy, progressive with mental ret |
| GO | photoreceptor cell maintenance        | 2  | 22  | 0.449431  | 84059  | G protein-coupled receptor 98                                            |
| GO | placenta development                  | 2  | 22  | 0.449431  | 2707   | gap junction protein, beta 3, 31kDa                                      |
| GO | placenta development                  | 2  | 22  | 0.449431  | 6256   | retinoid X receptor, alpha                                               |
| GO | pigmentation                          | 2  | 22  | 0.449431  | 4286   | microphthalmia-associated transcription factor                           |
| GO | pigmentation                          | 2  | 22  | 0.449431  | 5873   | RAB27A, member RAS oncogene family                                       |
| GO | eating behavior                       | 2  | 22  | 0.449431  | 4889   | neuropeptide Y receptor Y5                                               |
| GO | eating behavior                       | 2  | 22  | 0.449431  | 885    | cholecystokinin                                                          |
| GO | histone-lysine N-methyltransferase a  | 2  | 22  | 0.449431  | 54904  | Wolf-Hirschhorn syndrome candidate 1-like 1                              |
| GO | histone-lysine N-methyltransferase a  | 2  | 22  | 0.449431  | 55870  | ash1 (absent, small, or homeotic)-like (Drosophila)                      |
| GO | transport                             | 36 | 511 | 0.4498762 | 1080   | cystic fibrosis transmembrane conductance regulator (ATP-binding cas:    |

|                                         |    |     |           |                                                                                       |
|-----------------------------------------|----|-----|-----------|---------------------------------------------------------------------------------------|
| GO transport                            | 36 | 511 | 0.4498762 | 1193 chloride intracellular channel 2                                                 |
| GO transport                            | 36 | 511 | 0.4498762 | 1382 cellular retinoic acid binding protein 2                                         |
| GO transport                            | 36 | 511 | 0.4498762 | 143425 synaptotagmin IX                                                               |
| GO transport                            | 36 | 511 | 0.4498762 | 23208 synaptotagmin XI                                                                |
| GO transport                            | 36 | 511 | 0.4498762 | 2564 gamma-aminobutyric acid (GABA) A receptor, epsilon                               |
| GO transport                            | 36 | 511 | 0.4498762 | 26119 low density lipoprotein receptor adaptor protein 1                              |
| GO transport                            | 36 | 511 | 0.4498762 | 2706 gap junction protein, beta 2, 26kDa                                              |
| GO transport                            | 36 | 511 | 0.4498762 | 28982 feline leukemia virus subgroup C cellular receptor 1                            |
| GO transport                            | 36 | 511 | 0.4498762 | 368 ATP-binding cassette, sub-family C (CFTR/MRP), member 6                           |
| GO transport                            | 36 | 511 | 0.4498762 | 3709 inositol 1,4,5-triphosphate receptor, type 2                                     |
| GO transport                            | 36 | 511 | 0.4498762 | 4151 myoglobin                                                                        |
| GO transport                            | 36 | 511 | 0.4498762 | 493 ATPase, Ca <sup>++</sup> transporting, plasma membrane 4                          |
| GO transport                            | 36 | 511 | 0.4498762 | 5025 purinergic receptor P2X, ligand-gated ion channel, 4                             |
| GO transport                            | 36 | 511 | 0.4498762 | 5243 ATP-binding cassette, sub-family B (MDR/TAP), member 1                           |
| GO transport                            | 36 | 511 | 0.4498762 | 5244 ATP-binding cassette, sub-family B (MDR/TAP), member 4                           |
| GO transport                            | 36 | 511 | 0.4498762 | 53405 chloride intracellular channel 5                                                |
| GO transport                            | 36 | 511 | 0.4498762 | 55068 ecto-NOX disulfide-thiol exchanger 1                                            |
| GO transport                            | 36 | 511 | 0.4498762 | 56172 ankylosis, progressive homolog (mouse)                                          |
| GO transport                            | 36 | 511 | 0.4498762 | 56605 ERO1-like beta ( <i>S. cerevisiae</i> )                                         |
| GO transport                            | 36 | 511 | 0.4498762 | 5950 retinol binding protein 4, plasma                                                |
| GO transport                            | 36 | 511 | 0.4498762 | 6505 solute carrier family 1 (neuronal/epithelial high affinity glutamate transp      |
| GO transport                            | 36 | 511 | 0.4498762 | 6535 solute carrier family 6 (neurotransmitter transporter, creatine), memb           |
| GO transport                            | 36 | 511 | 0.4498762 | 6542 solute carrier family 7 (cationic amino acid transporter, $\gamma$ + system), me |
| GO transport                            | 36 | 511 | 0.4498762 | 6563 solute carrier family 14 (urea transporter), member 1 (Kidd blood group)         |
| GO transport                            | 36 | 511 | 0.4498762 | 6564 solute carrier family 15 (oligopeptide transporter), member 1                    |
| GO transport                            | 36 | 511 | 0.4498762 | 6565 solute carrier family 15 (H <sup>+</sup> /peptide transporter), member 2         |
| GO transport                            | 36 | 511 | 0.4498762 | 6857 synaptotagmin I                                                                  |
| GO transport                            | 36 | 511 | 0.4498762 | 774 calcium channel, voltage-dependent, N type, alpha 1B subunit                      |
| GO transport                            | 36 | 511 | 0.4498762 | 783 calcium channel, voltage-dependent, beta 2 subunit                                |
| GO transport                            | 36 | 511 | 0.4498762 | 79152 fatty acid 2-hydroxylase                                                        |
| GO transport                            | 36 | 511 | 0.4498762 | 83394 PITPNM family member 3                                                          |
| GO transport                            | 36 | 511 | 0.4498762 | 8671 solute carrier family 4, sodium bicarbonate cotransporter, member 4              |
| GO transport                            | 36 | 511 | 0.4498762 | 8911 calcium channel, voltage-dependent, T type, alpha 1I subunit                     |
| GO transport                            | 36 | 511 | 0.4498762 | 8912 calcium channel, voltage-dependent, T type, alpha 1H subunit                     |
| GO transport                            | 36 | 511 | 0.4498762 | 8973 cholinergic receptor, nicotinic, alpha 6                                         |
| GO cellular amino acid metabolic proces | 3  | 36  | 0.4503147 | 27165 glutaminase 2 (liver, mitochondrial)                                            |

|    |                                       |    |     |           |        |                                                                                     |
|----|---------------------------------------|----|-----|-----------|--------|-------------------------------------------------------------------------------------|
| GO | cellular amino acid metabolic process | 3  | 36  | 0.4503147 | 4524   | 5,10-methylenetetrahydrofolate reductase (NADPH)                                    |
| GO | cellular amino acid metabolic process | 3  | 36  | 0.4503147 | 6542   | solute carrier family 7 (cationic amino acid transporter, y+ system), member 7      |
| GO | I-kappaB kinase/NF-kappaB cascade     | 3  | 36  | 0.4503147 | 7097   | toll-like receptor 2                                                                |
| GO | I-kappaB kinase/NF-kappaB cascade     | 3  | 36  | 0.4503147 | 7099   | toll-like receptor 4                                                                |
| GO | I-kappaB kinase/NF-kappaB cascade     | 3  | 36  | 0.4503147 | 7100   | toll-like receptor 5                                                                |
| GO | perinuclear region of cytoplasm       | 22 | 309 | 0.4530558 | 10335  | murine retrovirus integration site 1 homolog                                        |
| GO | perinuclear region of cytoplasm       | 22 | 309 | 0.4530558 | 11155  | LIM domain binding 3                                                                |
| GO | perinuclear region of cytoplasm       | 22 | 309 | 0.4530558 | 114569 | mal, T-cell differentiation protein 2                                               |
| GO | perinuclear region of cytoplasm       | 22 | 309 | 0.4530558 | 1435   | colony stimulating factor 1 (macrophage)                                            |
| GO | perinuclear region of cytoplasm       | 22 | 309 | 0.4530558 | 1508   | cathepsin B                                                                         |
| GO | perinuclear region of cytoplasm       | 22 | 309 | 0.4530558 | 1540   | cylindromatosis (turban tumor syndrome)                                             |
| GO | perinuclear region of cytoplasm       | 22 | 309 | 0.4530558 | 255738 | proprotein convertase subtilisin/kexin type 9                                       |
| GO | perinuclear region of cytoplasm       | 22 | 309 | 0.4530558 | 2589   | UDP-N-acetyl-alpha-D-galactosamine:polypeptide N-acetylgalactosaminyl transferase 1 |
| GO | perinuclear region of cytoplasm       | 22 | 309 | 0.4530558 | 4645   | myosin VB                                                                           |
| GO | perinuclear region of cytoplasm       | 22 | 309 | 0.4530558 | 4794   | nuclear factor of kappa light polypeptide gene enhancer in B-cells inhibitor 3      |
| GO | perinuclear region of cytoplasm       | 22 | 309 | 0.4530558 | 4842   | nitric oxide synthase 1 (neuronal)                                                  |
| GO | perinuclear region of cytoplasm       | 22 | 309 | 0.4530558 | 5025   | purinergic receptor P2X, ligand-gated ion channel, 4                                |
| GO | perinuclear region of cytoplasm       | 22 | 309 | 0.4530558 | 5071   | Parkinson disease (autosomal recessive, juvenile) 2, parkin                         |
| GO | perinuclear region of cytoplasm       | 22 | 309 | 0.4530558 | 5122   | proprotein convertase subtilisin/kexin type 1                                       |
| GO | perinuclear region of cytoplasm       | 22 | 309 | 0.4530558 | 5152   | phosphodiesterase 9A                                                                |
| GO | perinuclear region of cytoplasm       | 22 | 309 | 0.4530558 | 51655  | RAS, dexamethasone-induced 1                                                        |
| GO | perinuclear region of cytoplasm       | 22 | 309 | 0.4530558 | 5577   | protein kinase, cAMP-dependent, regulatory, type II, beta                           |
| GO | perinuclear region of cytoplasm       | 22 | 309 | 0.4530558 | 57799  | RAB40C, member RAS oncogene family                                                  |
| GO | perinuclear region of cytoplasm       | 22 | 309 | 0.4530558 | 5801   | protein tyrosine phosphatase, receptor type, R                                      |
| GO | perinuclear region of cytoplasm       | 22 | 309 | 0.4530558 | 6494   | signal-induced proliferation-associated 1                                           |
| GO | perinuclear region of cytoplasm       | 22 | 309 | 0.4530558 | 7099   | toll-like receptor 4                                                                |
| GO | perinuclear region of cytoplasm       | 22 | 309 | 0.4530558 | 81544  | glycerophosphodiester phosphodiesterase domain containing 5                         |
| GO | postsynaptic density                  | 6  | 79  | 0.4563248 | 1785   | dynamitin 2                                                                         |
| GO | postsynaptic density                  | 6  | 79  | 0.4563248 | 2066   | v-erb-a erythroblastic leukemia viral oncogene homolog 4 (avian)                    |
| GO | postsynaptic density                  | 6  | 79  | 0.4563248 | 22859  | latrophilin 1                                                                       |
| GO | postsynaptic density                  | 6  | 79  | 0.4563248 | 2911   | glutamate receptor, metabotropic 1                                                  |
| GO | postsynaptic density                  | 6  | 79  | 0.4563248 | 5025   | purinergic receptor P2X, ligand-gated ion channel, 4                                |
| GO | postsynaptic density                  | 6  | 79  | 0.4563248 | 9892   | synaptosomal-associated protein, 91kDa homolog (mouse)                              |
| GO | nervous system development            | 27 | 382 | 0.4569011 | 10439  | olfactomedin 1                                                                      |
| GO | nervous system development            | 27 | 382 | 0.4569011 | 10507  | sema domain, immunoglobulin domain (Ig), transmembrane domain (TM) 1                |
| GO | nervous system development            | 27 | 382 | 0.4569011 | 10752  | cell adhesion molecule with homology to L1CAM (close homolog of L1)                 |



|                               |    |     |           |                                                                               |
|-------------------------------|----|-----|-----------|-------------------------------------------------------------------------------|
| GO nervous system development | 27 | 382 | 0.4569011 | 1948 ephrin-B2                                                                |
| GO nervous system development | 27 | 382 | 0.4569011 | 2033 E1A binding protein p300                                                 |
| GO nervous system development | 27 | 382 | 0.4569011 | 2055 ceroid-lipofuscinosis, neuronal 8 (epilepsy, progressive with mental ret |
| GO nervous system development | 27 | 382 | 0.4569011 | 223117 sema domain, immunoglobulin domain (Ig), short basic domain, secret    |
| GO nervous system development | 27 | 382 | 0.4569011 | 23092 Rho GTPase activating protein 26                                        |
| GO nervous system development | 27 | 382 | 0.4569011 | 2353 FBJ murine osteosarcoma viral oncogene homolog                           |
| GO nervous system development | 27 | 382 | 0.4569011 | 26468 LIM homeobox 6                                                          |
| GO nervous system development | 27 | 382 | 0.4569011 | 29116 myosin regulatory light chain interacting protein                       |
| GO nervous system development | 27 | 382 | 0.4569011 | 342035 gliomedin                                                              |
| GO nervous system development | 27 | 382 | 0.4569011 | 3479 insulin-like growth factor 1 (somatomedin C)                             |
| GO nervous system development | 27 | 382 | 0.4569011 | 4209 myocyte enhancer factor 2D                                               |
| GO nervous system development | 27 | 382 | 0.4569011 | 4692 necdin homolog (mouse)                                                   |
| GO nervous system development | 27 | 382 | 0.4569011 | 4853 Notch homolog 2 (Drosophila)                                             |
| GO nervous system development | 27 | 382 | 0.4569011 | 4915 neurotrophic tyrosine kinase, receptor, type 2                           |
| GO nervous system development | 27 | 382 | 0.4569011 | 4929 nuclear receptor subfamily 4, group A, member 2                          |
| GO nervous system development | 27 | 382 | 0.4569011 | 55816 docking protein 5                                                       |
| GO nervous system development | 27 | 382 | 0.4569011 | 5801 protein tyrosine phosphatase, receptor type, R                           |
| GO nervous system development | 27 | 382 | 0.4569011 | 627 brain-derived neurotrophic factor                                         |
| GO nervous system development | 27 | 382 | 0.4569011 | 6604 SWI/SNF related, matrix associated, actin dependent regulator of chrom   |
| GO nervous system development | 27 | 382 | 0.4569011 | 81544 glycerophosphodiester phosphodiesterase domain containing 5             |
| GO nervous system development | 27 | 382 | 0.4569011 | 84059 G protein-coupled receptor 98                                           |
| GO nervous system development | 27 | 382 | 0.4569011 | 85416 Zic family member 5 (odd-paired homolog, Drosophila)                    |
| GO nervous system development | 27 | 382 | 0.4569011 | 9445 integral membrane protein 2B                                             |
| GO nervous system development | 27 | 382 | 0.4569011 | 9615 guanine deaminase                                                        |
| GO muscle organ development   | 7  | 94  | 0.4640939 | 1839 heparin-binding EGF-like growth factor                                   |
| GO muscle organ development   | 7  | 94  | 0.4640939 | 1960 early growth response 3                                                  |
| GO muscle organ development   | 7  | 94  | 0.4640939 | 3479 insulin-like growth factor 1 (somatomedin C)                             |
| GO muscle organ development   | 7  | 94  | 0.4640939 | 3911 laminin, alpha 5                                                         |
| GO muscle organ development   | 7  | 94  | 0.4640939 | 4209 myocyte enhancer factor 2D                                               |
| GO muscle organ development   | 7  | 94  | 0.4640939 | 5463 POU class 6 homeobox 1                                                   |
| GO muscle organ development   | 7  | 94  | 0.4640939 | 8912 calcium channel, voltage-dependent, T type, alpha 1H subunit             |
| GO cell projection            | 7  | 94  | 0.4640939 | 2867 free fatty acid receptor 2                                               |
| GO cell projection            | 7  | 94  | 0.4640939 | 4842 nitric oxide synthase 1 (neuronal)                                       |
| GO cell projection            | 7  | 94  | 0.4640939 | 51168 myosin XVA                                                              |
| GO cell projection            | 7  | 94  | 0.4640939 | 5152 phosphodiesterase 9A                                                     |
| GO cell projection            | 7  | 94  | 0.4640939 | 729993 shisa homolog 9 (Xenopus laevis)                                       |

|                                           |   |    |           |                                                                               |
|-------------------------------------------|---|----|-----------|-------------------------------------------------------------------------------|
| GO cell projection                        | 7 | 94 | 0.4640939 | 81544 glycerophosphodiester phosphodiesterase domain containing 5             |
| GO cell projection                        | 7 | 94 | 0.4640939 | 8842 prominin 1                                                               |
| GO regulation of growth                   | 4 | 51 | 0.4641161 | 10481 homeobox B13                                                            |
| GO regulation of growth                   | 4 | 51 | 0.4641161 | 4692 necdin homolog (mouse)                                                   |
| GO regulation of growth                   | 4 | 51 | 0.4641161 | 51754 transmembrane protein 8B                                                |
| GO regulation of growth                   | 4 | 51 | 0.4641161 | 9021 suppressor of cytokine signaling 3                                       |
| GO secretory granule                      | 4 | 51 | 0.4641161 | 1114 chromogranin B (secretogranin 1)                                         |
| GO secretory granule                      | 4 | 51 | 0.4641161 | 5066 peptidylglycine alpha-amidating monooxygenase                            |
| GO secretory granule                      | 4 | 51 | 0.4641161 | 5122 proprotein convertase subtilisin/kexin type 1                            |
| GO secretory granule                      | 4 | 51 | 0.4641161 | 5327 plasminogen activator, tissue                                            |
| GO cartilage development                  | 3 | 37 | 0.4684532 | 1906 endothelin 1                                                             |
| GO cartilage development                  | 3 | 37 | 0.4684532 | 5307 paired-like homeodomain 1                                                |
| GO cartilage development                  | 3 | 37 | 0.4684532 | 5396 paired related homeobox 1                                                |
| GO protein catabolic process              | 3 | 37 | 0.4684532 | 2055 ceroid-lipofuscinosis, neuronal 8 (epilepsy, progressive with mental ret |
| GO protein catabolic process              | 3 | 37 | 0.4684532 | 26232 F-box protein 2                                                         |
| GO protein catabolic process              | 3 | 37 | 0.4684532 | 26270 F-box protein 6                                                         |
| GO protein localization at cell surface   | 1 | 9  | 0.4712841 | 10076 protein tyrosine phosphatase, receptor type, U                          |
| GO androgen metabolic process             | 1 | 9  | 0.4712841 | 10170 dehydrogenase/reductase (SDR family) member 9                           |
| GO mitotic cell cycle                     | 1 | 9  | 0.4712841 | 10769 polo-like kinase 2 (Drosophila)                                         |
| GO pseudopodium                           | 1 | 9  | 0.4712841 | 11155 LIM domain binding 3                                                    |
| GO adult feeding behavior                 | 1 | 9  | 0.4712841 | 127343 diencephalon/mesencephalon homeobox 1                                  |
| GO dendrite cytoplasm                     | 1 | 9  | 0.4712841 | 127933 U2AF homology motif (UHM) kinase 1                                     |
| GO macrophage differentiation             | 1 | 9  | 0.4712841 | 1435 colony stimulating factor 1 (macrophage)                                 |
| GO histone monoubiquitination             | 1 | 9  | 0.4712841 | 151636 deltex 3-like (Drosophila)                                             |
| GO gonad development                      | 1 | 9  | 0.4712841 | 157506 retinol dehydrogenase 10 (all-trans)                                   |
| GO lamellipodium membrane                 | 1 | 9  | 0.4712841 | 1803 dipeptidyl-peptidase 4                                                   |
| GO positive regulation of JUN kinase acti | 1 | 9  | 0.4712841 | 1906 endothelin 1                                                             |
| GO cellular response to reactive oxygen s | 1 | 9  | 0.4712841 | 2353 FBJ murine osteosarcoma viral oncogene homolog                           |
| GO sleep                                  | 1 | 9  | 0.4712841 | 2353 FBJ murine osteosarcoma viral oncogene homolog                           |
| GO L-fucose catabolic process             | 1 | 9  | 0.4712841 | 2526 fucosyltransferase 4 (alpha (1,3) fucosyltransferase, myeloid-specific)  |
| GO positive regulation of receptor-media  | 1 | 9  | 0.4712841 | 26119 low density lipoprotein receptor adaptor protein 1                      |
| GO DNA damage response, signal transdi    | 1 | 9  | 0.4712841 | 28996 homeodomain interacting protein kinase 2                                |
| GO specific granule                       | 1 | 9  | 0.4712841 | 311 annexin A11                                                               |
| GO serotonin binding                      | 1 | 9  | 0.4712841 | 3355 5-hydroxytryptamine (serotonin) receptor 1F                              |
| GO positive regulation of tyrosine phosph | 1 | 9  | 0.4712841 | 3479 insulin-like growth factor 1 (somatomedin C)                             |
| GO proteoglycan biosynthetic process      | 1 | 9  | 0.4712841 | 3479 insulin-like growth factor 1 (somatomedin C)                             |

|    |                                                       |   |   |           |                                                                                        |
|----|-------------------------------------------------------|---|---|-----------|----------------------------------------------------------------------------------------|
| GO | regulation of peptidyl-tyrosine phosphatase activity  | 1 | 9 | 0.4712841 | 3689 integrin, beta 2 (complement component 3 receptor 3 and 4 subunit)                |
| GO | muscarinic acetylcholine receptor signaling pathway   | 1 | 9 | 0.4712841 | 375790 agrin                                                                           |
| GO | positive regulation of nitric-oxide synthase activity | 1 | 9 | 0.4712841 | 3845 v-Ki-ras2 Kirsten rat sarcoma viral oncogene homolog                              |
| GO | branching involved in salivary gland morphogenesis    | 1 | 9 | 0.4712841 | 3911 laminin, alpha 5                                                                  |
| GO | organ growth                                          | 1 | 9 | 0.4712841 | 4087 SMAD family member 2                                                              |
| GO | axonal fasciculation                                  | 1 | 9 | 0.4712841 | 4692 necdin homolog (mouse)                                                            |
| GO | central nervous system neuron differentiation         | 1 | 9 | 0.4712841 | 4929 nuclear receptor subfamily 4, group A, member 2                                   |
| GO | MHC class I protein binding                           | 1 | 9 | 0.4712841 | 498 ATP synthase, H <sup>+</sup> transporting, mitochondrial F1 complex, alpha subunit |
| GO | vacuolar proton-transporting V-type ATPase activity   | 1 | 9 | 0.4712841 | 50617 ATPase, H <sup>+</sup> transporting, lysosomal V0 subunit a4                     |
| GO | insulin-like growth factor receptor signaling pathway | 1 | 9 | 0.4712841 | 5295 phosphoinositide-3-kinase, regulatory subunit 1 (alpha)                           |
| GO | maintenance of protein location in nucleus            | 1 | 9 | 0.4712841 | 5371 promyelocytic leukemia                                                            |
| GO | female gonad development                              | 1 | 9 | 0.4712841 | 54361 wingless-type MMTV integration site family, member 4                             |
| GO | organic anion transmembrane transporter activity      | 1 | 9 | 0.4712841 | 55867 solute carrier family 22 (organic anion/urate transporter), member 11            |
| GO | grooming behavior                                     | 1 | 9 | 0.4712841 | 56923 neuromedin U receptor 2                                                          |
| GO | response to pain                                      | 1 | 9 | 0.4712841 | 56923 neuromedin U receptor 2                                                          |
| GO | apical protein localization                           | 1 | 9 | 0.4712841 | 57619 shroom family member 3                                                           |
| GO | melanosome transport                                  | 1 | 9 | 0.4712841 | 5873 RAB27A, member RAS oncogene family                                                |
| GO | negative regulation of S phase of mitotic cell cycle  | 1 | 9 | 0.4712841 | 604 B-cell CLL/lymphoma 6                                                              |
| GO | detection of bacterium                                | 1 | 9 | 0.4712841 | 64127 nucleotide-binding oligomerization domain containing 2                           |
| GO | dicarboxylic acid transport                           | 1 | 9 | 0.4712841 | 6505 solute carrier family 1 (neuronal/epithelial high affinity glutamate transporter) |
| GO | epithelial tube branching involved in morphogenesis   | 1 | 9 | 0.4712841 | 652 bone morphogenetic protein 4                                                       |
| GO | smooth muscle tissue development                      | 1 | 9 | 0.4712841 | 652 bone morphogenetic protein 4                                                       |
| GO | muscle cell differentiation                           | 1 | 9 | 0.4712841 | 6604 SWI/SNF related, matrix associated, actin dependent regulator of chromatin        |
| GO | positive regulation of release of sequestered protein | 1 | 9 | 0.4712841 | 6622 synuclein, alpha (non A4 component of amyloid precursor)                          |
| GO | spectrin                                              | 1 | 9 | 0.4712841 | 6710 spectrin, beta, erythrocytic                                                      |
| GO | T-helper 1 type immune response                       | 1 | 9 | 0.4712841 | 7099 toll-like receptor 4                                                              |
| GO | cleavage furrow                                       | 1 | 9 | 0.4712841 | 7170 tropomyosin 3                                                                     |
| GO | DNA-(apurinic or apyrimidinic site) lyase activity    | 1 | 9 | 0.4712841 | 79661 nei endonuclease VIII-like 1 (E. coli)                                           |
| GO | quinone binding                                       | 1 | 9 | 0.4712841 | 79802 HHIP-like 2                                                                      |
| GO | sensory perception of light stimulus                  | 1 | 9 | 0.4712841 | 84059 G protein-coupled receptor 98                                                    |
| GO | ER overload response                                  | 1 | 9 | 0.4712841 | 84919 protein phosphatase 1, regulatory (inhibitor) subunit 15B                        |
| GO | hedgehog receptor activity                            | 1 | 9 | 0.4712841 | 84976 dispatched homolog 1 (Drosophila)                                                |
| GO | two-component signal transduction system              | 1 | 9 | 0.4712841 | 8622 phosphodiesterase 8B                                                              |
| GO | oligosaccharide biosynthetic process                  | 1 | 9 | 0.4712841 | 8706 beta-1,3-N-acetylgalactosaminyltransferase 1 (globoside blood group)              |
| GO | response to food                                      | 1 | 9 | 0.4712841 | 9021 suppressor of cytokine signaling 3                                                |
| GO | ovulation from ovarian follicle                       | 1 | 9 | 0.4712841 | 9510 ADAM metallopeptidase with thrombospondin type 1 motif, 1                         |

|                                            |    |      |           |                                                                             |
|--------------------------------------------|----|------|-----------|-----------------------------------------------------------------------------|
| GO phospholipid efflux                     | 1  | 9    | 0.4712841 | 9619 ATP-binding cassette, sub-family G (WHITE), member 1                   |
| GO retinoid X receptor binding             | 1  | 9    | 0.4712841 | 9971 nuclear receptor subfamily 1, group H, member 4                        |
| GO condensed nuclear chromosome, cer       | 1  | 9    | 0.4712841 | 9985 REC8 homolog (yeast)                                                   |
| GO sarcoplasmic reticulum                  | 2  | 23   | 0.4726851 | 10335 murine retrovirus integration site 1 homolog                          |
| GO sarcoplasmic reticulum                  | 2  | 23   | 0.4726851 | 4842 nitric oxide synthase 1 (neuronal)                                     |
| GO positive regulation of multicellular or | 2  | 23   | 0.4726851 | 1435 colony stimulating factor 1 (macrophage)                               |
| GO positive regulation of multicellular or | 2  | 23   | 0.4726851 | 183 angiotensinogen (serpin peptidase inhibitor, clade A, member 8)         |
| GO protease binding                        | 2  | 23   | 0.4726851 | 1471 cystatin C                                                             |
| GO protease binding                        | 2  | 23   | 0.4726851 | 1803 dipeptidyl-peptidase 4                                                 |
| GO ER-associated protein catabolic proce   | 2  | 23   | 0.4726851 | 26270 F-box protein 6                                                       |
| GO ER-associated protein catabolic proce   | 2  | 23   | 0.4726851 | 55432 YOD1 OTU deubiquinating enzyme 1 homolog ( <i>S. cerevisiae</i> )     |
| GO erythrocyte differentiation             | 2  | 23   | 0.4726851 | 28982 feline leukemia virus subgroup C cellular receptor 1                  |
| GO erythrocyte differentiation             | 2  | 23   | 0.4726851 | 652 bone morphogenetic protein 4                                            |
| GO regulation of cell adhesion             | 2  | 23   | 0.4726851 | 3911 laminin, alpha 5                                                       |
| GO regulation of cell adhesion             | 2  | 23   | 0.4726851 | 9595 cytohesin 1 interacting protein                                        |
| GO Golgi stack                             | 2  | 23   | 0.4726851 | 53947 alpha 1,4-galactosyltransferase                                       |
| GO Golgi stack                             | 2  | 23   | 0.4726851 | 54947 lysophosphatidylcholine acyltransferase 2                             |
| GO nucleobase, nucleoside, nucleotide a    | 5  | 66   | 0.4735451 | 205 adenylate kinase 3-like 1                                               |
| GO nucleobase, nucleoside, nucleotide a    | 5  | 66   | 0.4735451 | 4939 2'-5'-oligoadenylate synthetase 2, 69/71kDa                            |
| GO nucleobase, nucleoside, nucleotide a    | 5  | 66   | 0.4735451 | 54932 exonuclease 3'-5' domain containing 3                                 |
| GO nucleobase, nucleoside, nucleotide a    | 5  | 66   | 0.4735451 | 9615 guanine deaminase                                                      |
| GO nucleobase, nucleoside, nucleotide a    | 5  | 66   | 0.4735451 | 9962 solute carrier family 23 (nucleobase transporters), member 2           |
| GO DNA binding                             | 96 | 1392 | 0.4787924 | 10838 zinc finger protein 275                                               |
| GO DNA binding                             | 96 | 1392 | 0.4787924 | 10891 peroxisome proliferator-activated receptor gamma, coactivator 1 alpha |
| GO DNA binding                             | 96 | 1392 | 0.4787924 | 11279 Kruppel-like factor 8                                                 |
| GO DNA binding                             | 96 | 1392 | 0.4787924 | 115196 zinc finger protein 554                                              |
| GO DNA binding                             | 96 | 1392 | 0.4787924 | 127343 diencephalon/mesencephalon homeobox 1                                |
| GO DNA binding                             | 96 | 1392 | 0.4787924 | 147694 zinc finger protein 548                                              |
| GO DNA binding                             | 96 | 1392 | 0.4787924 | 147923 zinc finger protein 420                                              |
| GO DNA binding                             | 96 | 1392 | 0.4787924 | 158800 RhoX homeobox family, member 1                                       |
| GO DNA binding                             | 96 | 1392 | 0.4787924 | 162962 zinc finger protein 836                                              |
| GO DNA binding                             | 96 | 1392 | 0.4787924 | 163050 zinc finger protein 564                                              |
| GO DNA binding                             | 96 | 1392 | 0.4787924 | 163115 zinc finger protein 781                                              |
| GO DNA binding                             | 96 | 1392 | 0.4787924 | 1958 early growth response 1                                                |
| GO DNA binding                             | 96 | 1392 | 0.4787924 | 2033 E1A binding protein p300                                               |
| GO DNA binding                             | 96 | 1392 | 0.4787924 | 2114 v-ets erythroblastosis virus E26 oncogene homolog 2 (avian)            |

|                |    |      |           |                                                                           |
|----------------|----|------|-----------|---------------------------------------------------------------------------|
| GO DNA binding | 96 | 1392 | 0.4787924 | 2122 MDS1 and EVI1 complex locus                                          |
| GO DNA binding | 96 | 1392 | 0.4787924 | 220359 tigger transposable element derived 3                              |
| GO DNA binding | 96 | 1392 | 0.4787924 | 222546 regulatory factor X, 6                                             |
| GO DNA binding | 96 | 1392 | 0.4787924 | 22807 IKAROS family zinc finger 2 (Helios)                                |
| GO DNA binding | 96 | 1392 | 0.4787924 | 2290 forkhead box G1                                                      |
| GO DNA binding | 96 | 1392 | 0.4787924 | 2296 forkhead box C1                                                      |
| GO DNA binding | 96 | 1392 | 0.4787924 | 23099 zinc finger and BTB domain containing 43                            |
| GO DNA binding | 96 | 1392 | 0.4787924 | 23119 hypermethylated in cancer 2                                         |
| GO DNA binding | 96 | 1392 | 0.4787924 | 23476 bromodomain containing 4                                            |
| GO DNA binding | 96 | 1392 | 0.4787924 | 2354 FBJ murine osteosarcoma viral oncogene homolog B                     |
| GO DNA binding | 96 | 1392 | 0.4787924 | 23648 single stranded DNA binding protein 3                               |
| GO DNA binding | 96 | 1392 | 0.4787924 | 2521 fused in sarcoma                                                     |
| GO DNA binding | 96 | 1392 | 0.4787924 | 256051 zinc finger protein 549                                            |
| GO DNA binding | 96 | 1392 | 0.4787924 | 25946 zinc finger protein 385A                                            |
| GO DNA binding | 96 | 1392 | 0.4787924 | 27245 AT hook, DNA binding motif, containing 1                            |
| GO DNA binding | 96 | 1392 | 0.4787924 | 27434 polymerase (DNA directed), mu                                       |
| GO DNA binding | 96 | 1392 | 0.4787924 | 284346 zinc finger protein 575                                            |
| GO DNA binding | 96 | 1392 | 0.4787924 | 3131 hepatic leukemia factor                                              |
| GO DNA binding | 96 | 1392 | 0.4787924 | 3164 nuclear receptor subfamily 4, group A, member 1                      |
| GO DNA binding | 96 | 1392 | 0.4787924 | 3169 forkhead box A1                                                      |
| GO DNA binding | 96 | 1392 | 0.4787924 | 3192 heterogeneous nuclear ribonucleoprotein U (scaffold attachment facto |
| GO DNA binding | 96 | 1392 | 0.4787924 | 3428 interferon, gamma-inducible protein 16                               |
| GO DNA binding | 96 | 1392 | 0.4787924 | 342908 zinc finger protein 404                                            |
| GO DNA binding | 96 | 1392 | 0.4787924 | 345462 zinc finger protein 879                                            |
| GO DNA binding | 96 | 1392 | 0.4787924 | 3725 jun oncogene                                                         |
| GO DNA binding | 96 | 1392 | 0.4787924 | 3726 jun B proto-oncogene                                                 |
| GO DNA binding | 96 | 1392 | 0.4787924 | 388536 zinc finger protein 790                                            |
| GO DNA binding | 96 | 1392 | 0.4787924 | 388558 zinc finger protein 808                                            |
| GO DNA binding | 96 | 1392 | 0.4787924 | 388567 zinc finger protein 749                                            |
| GO DNA binding | 96 | 1392 | 0.4787924 | 389058 Sp5 transcription factor                                           |
| GO DNA binding | 96 | 1392 | 0.4787924 | 4005 LIM domain only 2 (rhombotin-like 1)                                 |
| GO DNA binding | 96 | 1392 | 0.4787924 | 4087 SMAD family member 2                                                 |
| GO DNA binding | 96 | 1392 | 0.4787924 | 4204 methyl CpG binding protein 2 (Rett syndrome)                         |
| GO DNA binding | 96 | 1392 | 0.4787924 | 4613 v-myc myelocytomatosis viral related oncogene, neuroblastoma derive  |
| GO DNA binding | 96 | 1392 | 0.4787924 | 4692 necdin homolog (mouse)                                               |
| GO DNA binding | 96 | 1392 | 0.4787924 | 4783 nuclear factor, interleukin 3 regulated                              |

|                |    |      |           |                                                                              |
|----------------|----|------|-----------|------------------------------------------------------------------------------|
| GO DNA binding | 96 | 1392 | 0.4787924 | 4802 nuclear transcription factor Y, gamma                                   |
| GO DNA binding | 96 | 1392 | 0.4787924 | 50809 heterochromatin protein 1, binding protein 3                           |
| GO DNA binding | 96 | 1392 | 0.4787924 | 5083 paired box 9                                                            |
| GO DNA binding | 96 | 1392 | 0.4787924 | 51085 MLX interacting protein-like                                           |
| GO DNA binding | 96 | 1392 | 0.4787924 | 51523 CXXC finger 5                                                          |
| GO DNA binding | 96 | 1392 | 0.4787924 | 51621 Kruppel-like factor 13                                                 |
| GO DNA binding | 96 | 1392 | 0.4787924 | 51710 zinc finger protein 44                                                 |
| GO DNA binding | 96 | 1392 | 0.4787924 | 5325 pleiomorphic adenoma gene-like 1                                        |
| GO DNA binding | 96 | 1392 | 0.4787924 | 5371 promyelocytic leukemia                                                  |
| GO DNA binding | 96 | 1392 | 0.4787924 | 5460 POU class 5 homeobox 1                                                  |
| GO DNA binding | 96 | 1392 | 0.4787924 | 5465 peroxisome proliferator-activated receptor alpha                        |
| GO DNA binding | 96 | 1392 | 0.4787924 | 55140 elongation protein 3 homolog ( <i>S. cerevisiae</i> )                  |
| GO DNA binding | 96 | 1392 | 0.4787924 | 55657 zinc finger protein 692                                                |
| GO DNA binding | 96 | 1392 | 0.4787924 | 55762 zinc finger protein 701                                                |
| GO DNA binding | 96 | 1392 | 0.4787924 | 55870 ash1 (absent, small, or homeotic)-like ( <i>Drosophila</i> )           |
| GO DNA binding | 96 | 1392 | 0.4787924 | 55893 zinc finger protein 395                                                |
| GO DNA binding | 96 | 1392 | 0.4787924 | 56978 PR domain containing 8                                                 |
| GO DNA binding | 96 | 1392 | 0.4787924 | 6097 RAR-related orphan receptor C                                           |
| GO DNA binding | 96 | 1392 | 0.4787924 | 6239 ras responsive element binding protein 1                                |
| GO DNA binding | 96 | 1392 | 0.4787924 | 6256 retinoid X receptor, alpha                                              |
| GO DNA binding | 96 | 1392 | 0.4787924 | 64135 interferon induced with helicase C domain 1                            |
| GO DNA binding | 96 | 1392 | 0.4787924 | 7022 transcription factor AP-2 gamma (activating enhancer binding protein 2) |
| GO DNA binding | 96 | 1392 | 0.4787924 | 7538 zinc finger protein 36, C3H type, homolog (mouse)                       |
| GO DNA binding | 96 | 1392 | 0.4787924 | 7546 Zic family member 2 (odd-paired homolog, <i>Drosophila</i> )            |
| GO DNA binding | 96 | 1392 | 0.4787924 | 7565 zinc finger protein 17                                                  |
| GO DNA binding | 96 | 1392 | 0.4787924 | 7597 zinc finger and BTB domain containing 25                                |
| GO DNA binding | 96 | 1392 | 0.4787924 | 7678 zinc finger protein 124                                                 |
| GO DNA binding | 96 | 1392 | 0.4787924 | 79132 DEXH (Asp-Glu-X-His) box polypeptide 58                                |
| GO DNA binding | 96 | 1392 | 0.4787924 | 79673 zinc finger protein 329                                                |
| GO DNA binding | 96 | 1392 | 0.4787924 | 79894 zinc finger protein 672                                                |
| GO DNA binding | 96 | 1392 | 0.4787924 | 8013 nuclear receptor subfamily 4, group A, member 3                         |
| GO DNA binding | 96 | 1392 | 0.4787924 | 80169 chromosome 17 open reading frame 68                                    |
| GO DNA binding | 96 | 1392 | 0.4787924 | 84159 AT rich interactive domain 5B (MRF1-like)                              |
| GO DNA binding | 96 | 1392 | 0.4787924 | 84911 zinc finger protein 382                                                |
| GO DNA binding | 96 | 1392 | 0.4787924 | 84969 TOX high mobility group box family member 2                            |
| GO DNA binding | 96 | 1392 | 0.4787924 | 85416 Zic family member 5 (odd-paired homolog, <i>Drosophila</i> )           |

|                                   |    |      |           |                                                                                |
|-----------------------------------|----|------|-----------|--------------------------------------------------------------------------------|
| GO DNA binding                    | 96 | 1392 | 0.4787924 | 85441 peroxisomal proliferator-activated receptor A interacting complex 285    |
| GO DNA binding                    | 96 | 1392 | 0.4787924 | 8653 DEAD (Asp-Glu-Ala-Asp) box polypeptide 3, Y-linked                        |
| GO DNA binding                    | 96 | 1392 | 0.4787924 | 90592 zinc finger protein 700                                                  |
| GO DNA binding                    | 96 | 1392 | 0.4787924 | 91748 chromosome 14 open reading frame 43                                      |
| GO DNA binding                    | 96 | 1392 | 0.4787924 | 92283 zinc finger protein 461                                                  |
| GO DNA binding                    | 96 | 1392 | 0.4787924 | 92822 zinc finger protein 276                                                  |
| GO DNA binding                    | 96 | 1392 | 0.4787924 | 9324 high mobility group nucleosomal binding domain 3                          |
| GO DNA binding                    | 96 | 1392 | 0.4787924 | 93349 SP140 nuclear body protein-like                                          |
| GO DNA binding                    | 96 | 1392 | 0.4787924 | 9422 zinc finger protein 264                                                   |
| GO DNA binding                    | 96 | 1392 | 0.4787924 | 9496 T-box 4                                                                   |
| GO signal transducer activity     | 20 | 285  | 0.4847925 | 10769 polo-like kinase 2 (Drosophila)                                          |
| GO signal transducer activity     | 20 | 285  | 0.4847925 | 2769 guanine nucleotide binding protein (G protein), alpha 15 (Gq class)       |
| GO signal transducer activity     | 20 | 285  | 0.4847925 | 3587 interleukin 10 receptor, alpha                                            |
| GO signal transducer activity     | 20 | 285  | 0.4847925 | 3601 interleukin 15 receptor, alpha                                            |
| GO signal transducer activity     | 20 | 285  | 0.4847925 | 5129 cyclin-dependent kinase 18                                                |
| GO signal transducer activity     | 20 | 285  | 0.4847925 | 51523 CXXC finger 5                                                            |
| GO signal transducer activity     | 20 | 285  | 0.4847925 | 5187 period homolog 1 (Drosophila)                                             |
| GO signal transducer activity     | 20 | 285  | 0.4847925 | 54361 wingless-type MMTV integration site family, member 4                     |
| GO signal transducer activity     | 20 | 285  | 0.4847925 | 6004 regulator of G-protein signaling 16                                       |
| GO signal transducer activity     | 20 | 285  | 0.4847925 | 6778 signal transducer and activator of transcription 6, interleukin-4 inducer |
| GO signal transducer activity     | 20 | 285  | 0.4847925 | 684 bone marrow stromal cell antigen 2                                         |
| GO signal transducer activity     | 20 | 285  | 0.4847925 | 7474 wingless-type MMTV integration site family, member 5A                     |
| GO signal transducer activity     | 20 | 285  | 0.4847925 | 7477 wingless-type MMTV integration site family, member 7B                     |
| GO signal transducer activity     | 20 | 285  | 0.4847925 | 79971 wntless homolog (Drosophila)                                             |
| GO signal transducer activity     | 20 | 285  | 0.4847925 | 80833 apolipoprotein L, 3                                                      |
| GO signal transducer activity     | 20 | 285  | 0.4847925 | 8313 axin 2                                                                    |
| GO signal transducer activity     | 20 | 285  | 0.4847925 | 8660 insulin receptor substrate 2                                              |
| GO signal transducer activity     | 20 | 285  | 0.4847925 | 8786 regulator of G-protein signaling 11                                       |
| GO signal transducer activity     | 20 | 285  | 0.4847925 | 8863 period homolog 3 (Drosophila)                                             |
| GO signal transducer activity     | 20 | 285  | 0.4847925 | 8864 period homolog 2 (Drosophila)                                             |
| GO carbohydrate metabolic process | 14 | 198  | 0.4876563 | 1117 chitinase 3-like 2                                                        |
| GO carbohydrate metabolic process | 14 | 198  | 0.4876563 | 2517 fucosidase, alpha-L- 1, tissue                                            |
| GO carbohydrate metabolic process | 14 | 198  | 0.4876563 | 2525 fucosyltransferase 3 (galactoside 3(4)-L-fucosyltransferase, Lewis blood  |
| GO carbohydrate metabolic process | 14 | 198  | 0.4876563 | 2526 fucosyltransferase 4 (alpha (1,3) fucosyltransferase, myeloid-specific)   |
| GO carbohydrate metabolic process | 14 | 198  | 0.4876563 | 2990 glucuronidase, beta                                                       |
| GO carbohydrate metabolic process | 14 | 198  | 0.4876563 | 3373 hyaluronoglucosaminidase 1                                                |

|                                            |    |     |           |                                                                                  |
|--------------------------------------------|----|-----|-----------|----------------------------------------------------------------------------------|
| GO carbohydrate metabolic process          | 14 | 198 | 0.4876563 | 3643 insulin receptor                                                            |
| GO carbohydrate metabolic process          | 14 | 198 | 0.4876563 | 5016 oviductal glycoprotein 1, 120kDa                                            |
| GO carbohydrate metabolic process          | 14 | 198 | 0.4876563 | 5239 phosphoglucomutase 5                                                        |
| GO carbohydrate metabolic process          | 14 | 198 | 0.4876563 | 56261 glycerophosphocholine phosphodiesterase GDE1 homolog ( <i>S. cerevisia</i> |
| GO carbohydrate metabolic process          | 14 | 198 | 0.4876563 | 6489 ST8 alpha-N-acetyl-neuraminide alpha-2,8-sialyltransferase 1                |
| GO carbohydrate metabolic process          | 14 | 198 | 0.4876563 | 79802 HHIP-like 2                                                                |
| GO carbohydrate metabolic process          | 14 | 198 | 0.4876563 | 9435 carbohydrate (N-acetylglucosamine-6-O) sulfotransferase 2                   |
| GO carbohydrate metabolic process          | 14 | 198 | 0.4876563 | 9563 hexose-6-phosphate dehydrogenase (glucose 1-dehydrogenase)                  |
| GO microtubule cytoskeleton                | 4  | 53  | 0.4943761 | 10397 N-myc downstream regulated 1                                               |
| GO microtubule cytoskeleton                | 4  | 53  | 0.4943761 | 51710 zinc finger protein 44                                                     |
| GO microtubule cytoskeleton                | 4  | 53  | 0.4943761 | 6819 sulfotransferase family, cytosolic, 1C, member 2                            |
| GO microtubule cytoskeleton                | 4  | 53  | 0.4943761 | 8900 cyclin A1                                                                   |
| GO cellular membrane organization          | 4  | 53  | 0.4943761 | 1785 dynamin 2                                                                   |
| GO cellular membrane organization          | 4  | 53  | 0.4943761 | 23418 crumbs homolog 1 ( <i>Drosophila</i> )                                     |
| GO cellular membrane organization          | 4  | 53  | 0.4943761 | 54947 lysophosphatidylcholine acyltransferase 2                                  |
| GO cellular membrane organization          | 4  | 53  | 0.4943761 | 8673 vesicle-associated membrane protein 8 (endobrevin)                          |
| GO activation of adenylate cyclase activit | 2  | 24  | 0.4953352 | 154 adrenergic, beta-2-, receptor, surface                                       |
| GO activation of adenylate cyclase activit | 2  | 24  | 0.4953352 | 4915 neurotrophic tyrosine kinase, receptor, type 2                              |
| GO oxygen and reactive oxygen species r    | 2  | 24  | 0.4953352 | 183 angiotensinogen (serpin peptidase inhibitor, clade A, member 8)              |
| GO oxygen and reactive oxygen species r    | 2  | 24  | 0.4953352 | 316 aldehyde oxidase 1                                                           |
| GO peripheral nervous system developm      | 2  | 24  | 0.4953352 | 1959 early growth response 2                                                     |
| GO peripheral nervous system developm      | 2  | 24  | 0.4953352 | 1960 early growth response 3                                                     |
| GO histone H3 acetylation                  | 2  | 24  | 0.4953352 | 23338 PHD finger protein 15                                                      |
| GO histone H3 acetylation                  | 2  | 24  | 0.4953352 | 23774 bromodomain containing 1                                                   |
| GO cilium assembly                         | 2  | 24  | 0.4953352 | 3175 one cut homeobox 1                                                          |
| GO cilium assembly                         | 2  | 24  | 0.4953352 | 3911 laminin, alpha 5                                                            |
| GO transmembrane transport                 | 34 | 492 | 0.4993007 | 1080 cystic fibrosis transmembrane conductance regulator (ATP-binding cas:       |
| GO transmembrane transport                 | 34 | 492 | 0.4993007 | 113235 solute carrier family 46 (folate transporter), member 1                   |
| GO transmembrane transport                 | 34 | 492 | 0.4993007 | 123096 solute carrier family 25, member 29                                       |
| GO transmembrane transport                 | 34 | 492 | 0.4993007 | 151473 solute carrier family 16, member 14 (monocarboxylic acid transporter :    |
| GO transmembrane transport                 | 34 | 492 | 0.4993007 | 157855 potassium channel, subfamily U, member 1                                  |
| GO transmembrane transport                 | 34 | 492 | 0.4993007 | 259232 sodium leak channel, non-selective                                        |
| GO transmembrane transport                 | 34 | 492 | 0.4993007 | 283537 solute carrier family 46, member 3                                        |
| GO transmembrane transport                 | 34 | 492 | 0.4993007 | 28982 feline leukemia virus subgroup C cellular receptor 1                       |
| GO transmembrane transport                 | 34 | 492 | 0.4993007 | 29015 solute carrier family 43, member 3                                         |
| GO transmembrane transport                 | 34 | 492 | 0.4993007 | 368 ATP-binding cassette, sub-family C (CFTR/MRP), member 6                      |



|                                           |    |     |           |                                                                               |
|-------------------------------------------|----|-----|-----------|-------------------------------------------------------------------------------|
| GO transmembrane transport                | 34 | 492 | 0.4993007 | 3709 inositol 1,4,5-triphosphate receptor, type 2                             |
| GO transmembrane transport                | 34 | 492 | 0.4993007 | 3786 potassium voltage-gated channel, KQT-like subfamily, member 3            |
| GO transmembrane transport                | 34 | 492 | 0.4993007 | 3790 potassium voltage-gated channel, delayed-rectifier, subfamily S, memb    |
| GO transmembrane transport                | 34 | 492 | 0.4993007 | 387923 stress-associated endoplasmic reticulum protein family member 2        |
| GO transmembrane transport                | 34 | 492 | 0.4993007 | 5243 ATP-binding cassette, sub-family B (MDR/TAP), member 1                   |
| GO transmembrane transport                | 34 | 492 | 0.4993007 | 5244 ATP-binding cassette, sub-family B (MDR/TAP), member 4                   |
| GO transmembrane transport                | 34 | 492 | 0.4993007 | 53373 two pore segment channel 1                                              |
| GO transmembrane transport                | 34 | 492 | 0.4993007 | 55867 solute carrier family 22 (organic anion/urate transporter), member 11   |
| GO transmembrane transport                | 34 | 492 | 0.4993007 | 57210 solute carrier family 45, member 4                                      |
| GO transmembrane transport                | 34 | 492 | 0.4993007 | 6006 Rh blood group, CcEe antigens                                            |
| GO transmembrane transport                | 34 | 492 | 0.4993007 | 6238 ribosome binding protein 1 homolog 180kDa (dog)                          |
| GO transmembrane transport                | 34 | 492 | 0.4993007 | 63027 solute carrier family 22, member 23                                     |
| GO transmembrane transport                | 34 | 492 | 0.4993007 | 64116 solute carrier family 39 (zinc transporter), member 8                   |
| GO transmembrane transport                | 34 | 492 | 0.4993007 | 6542 solute carrier family 7 (cationic amino acid transporter, y+ system), me |
| GO transmembrane transport                | 34 | 492 | 0.4993007 | 7223 transient receptor potential cation channel, subfamily C, member 4       |
| GO transmembrane transport                | 34 | 492 | 0.4993007 | 774 calcium channel, voltage-dependent, N type, alpha 1B subunit              |
| GO transmembrane transport                | 34 | 492 | 0.4993007 | 84561 solute carrier family 12 (potassium/chloride transporters), member 8    |
| GO transmembrane transport                | 34 | 492 | 0.4993007 | 84879 major facilitator superfamily domain containing 2A                      |
| GO transmembrane transport                | 34 | 492 | 0.4993007 | 8514 potassium voltage-gated channel, shaker-related subfamily, beta mem      |
| GO transmembrane transport                | 34 | 492 | 0.4993007 | 8911 calcium channel, voltage-dependent, T type, alpha 1I subunit             |
| GO transmembrane transport                | 34 | 492 | 0.4993007 | 8912 calcium channel, voltage-dependent, T type, alpha 1H subunit             |
| GO transmembrane transport                | 34 | 492 | 0.4993007 | 9194 solute carrier family 16, member 7 (monocarboxylic acid transporter 2)   |
| GO transmembrane transport                | 34 | 492 | 0.4993007 | 9481 solute carrier family 25, member 27                                      |
| GO transmembrane transport                | 34 | 492 | 0.4993007 | 9962 solute carrier family 23 (nucleobase transporters), member 2             |
| GO beta-catenin binding                   | 3  | 39  | 0.503887  | 10076 protein tyrosine phosphatase, receptor type, U                          |
| GO beta-catenin binding                   | 3  | 39  | 0.503887  | 2737 GLI family zinc finger 3                                                 |
| GO beta-catenin binding                   | 3  | 39  | 0.503887  | 8313 axin 2                                                                   |
| GO insoluble fraction                     | 3  | 39  | 0.503887  | 2026 enolase 2 (gamma, neuronal)                                              |
| GO insoluble fraction                     | 3  | 39  | 0.503887  | 53405 chloride intracellular channel 5                                        |
| GO insoluble fraction                     | 3  | 39  | 0.503887  | 5371 promyelocytic leukemia                                                   |
| GO G-protein signaling, coupled to cyclic | 3  | 39  | 0.503887  | 3355 5-hydroxytryptamine (serotonin) receptor 1F                              |
| GO G-protein signaling, coupled to cyclic | 3  | 39  | 0.503887  | 4886 neuropeptide Y receptor Y1                                               |
| GO G-protein signaling, coupled to cyclic | 3  | 39  | 0.503887  | 6751 somatostatin receptor 1                                                  |
| GO aging                                  | 6  | 83  | 0.5047025 | 10568 solute carrier family 34 (sodium phosphate), member 2                   |
| GO aging                                  | 6  | 83  | 0.5047025 | 2353 FBJ murine osteosarcoma viral oncogene homolog                           |
| GO aging                                  | 6  | 83  | 0.5047025 | 3725 jun oncogene                                                             |

|                                           |   |    |           |                                                                                 |
|-------------------------------------------|---|----|-----------|---------------------------------------------------------------------------------|
| GO aging                                  | 6 | 83 | 0.5047025 | 5742 prostaglandin-endoperoxide synthase 1 (prostaglandin G/H synthase and      |
| GO aging                                  | 6 | 83 | 0.5047025 | 6256 retinoid X receptor, alpha                                                 |
| GO aging                                  | 6 | 83 | 0.5047025 | 9021 suppressor of cytokine signaling 3                                         |
| GO chromatin silencing                    | 1 | 10 | 0.507438  | 10014 histone deacetylase 5                                                     |
| GO cellular respiration                   | 1 | 10 | 0.507438  | 10891 peroxisome proliferator-activated receptor gamma, coactivator 1 alpha     |
| GO acetylcholine binding                  | 1 | 10 | 0.507438  | 1139 cholinergic receptor, nicotinic, alpha 7                                   |
| GO cognition                              | 1 | 10 | 0.507438  | 1139 cholinergic receptor, nicotinic, alpha 7                                   |
| GO ribonucleoprotein binding              | 1 | 10 | 0.507438  | 127933 U2AF homology motif (UHM) kinase 1                                       |
| GO urea cycle                             | 1 | 10 | 0.507438  | 1373 carbamoyl-phosphate synthetase 1, mitochondrial                            |
| GO positive regulation of cytokine produ  | 1 | 10 | 0.507438  | 183 angiotensinogen (serpin peptidase inhibitor, clade A, member 8)             |
| GO positive regulation of collagen biosyn | 1 | 10 | 0.507438  | 2033 E1A binding protein p300                                                   |
| GO protein kinase B signaling cascade     | 1 | 10 | 0.507438  | 2033 E1A binding protein p300                                                   |
| GO carboxylic acid metabolic process      | 1 | 10 | 0.507438  | 2571 glutamate decarboxylase 1 (brain, 67kDa)                                   |
| GO histone acetyltransferase binding      | 1 | 10 | 0.507438  | 2737 GLI family zinc finger 3                                                   |
| GO I kappaB kinase complex                | 1 | 10 | 0.507438  | 29108 PYD and CARD domain containing                                            |
| GO MHC class I receptor activity          | 1 | 10 | 0.507438  | 3134 major histocompatibility complex, class I, F                               |
| GO positive regulation of smooth muscle   | 1 | 10 | 0.507438  | 3479 insulin-like growth factor 1 (somatomedin C)                               |
| GO acyl-CoA dehydrogenase activity        | 1 | 10 | 0.507438  | 35 acyl-Coenzyme A dehydrogenase, C-2 to C-3 short chain                        |
| GO water channel activity                 | 1 | 10 | 0.507438  | 358 aquaporin 1 (Colton blood group)                                            |
| GO morphogenesis of embryonic epithel     | 1 | 10 | 0.507438  | 3911 laminin, alpha 5                                                           |
| GO substrate adhesion-dependent cell sp   | 1 | 10 | 0.507438  | 3911 laminin, alpha 5                                                           |
| GO I-SMAD binding                         | 1 | 10 | 0.507438  | 4087 SMAD family member 2                                                       |
| GO oxygen transporter activity            | 1 | 10 | 0.507438  | 4151 myoglobin                                                                  |
| GO oxygen transport                       | 1 | 10 | 0.507438  | 4151 myoglobin                                                                  |
| GO lipopolysaccharide-mediated signalin   | 1 | 10 | 0.507438  | 4792 nuclear factor of kappa light polypeptide gene enhancer in B-cells inhib   |
| GO stem cell maintenance                  | 1 | 10 | 0.507438  | 4853 Notch homolog 2 (Drosophila)                                               |
| GO Golgi lumen                            | 1 | 10 | 0.507438  | 5046 proprotein convertase subtilisin/kexin type 6                              |
| GO CUL4 RING ubiquitin ligase complex     | 1 | 10 | 0.507438  | 54876 DDB1 and CUL4 associated factor 16                                        |
| GO cAMP-dependent protein kinase com      | 1 | 10 | 0.507438  | 5577 protein kinase, cAMP-dependent, regulatory, type II, beta                  |
| GO transmission of nerve impulse          | 1 | 10 | 0.507438  | 56923 neuromedin U receptor 2                                                   |
| GO isotype switching                      | 1 | 10 | 0.507438  | 57379 activation-induced cytidine deaminase                                     |
| GO cardiac muscle tissue development      | 1 | 10 | 0.507438  | 5950 retinol binding protein 4, plasma                                          |
| GO signalosome                            | 1 | 10 | 0.507438  | 64127 nucleotide-binding oligomerization domain containing 2                    |
| GO L-glutamate transmembrane transpo      | 1 | 10 | 0.507438  | 6505 solute carrier family 1 (neuronal/epithelial high affinity glutamate trans |
| GO calcium ion homeostasis                | 1 | 10 | 0.507438  | 6622 synuclein, alpha (non A4 component of amyloid precursor)                   |
| GO platelet alpha granule membrane        | 1 | 10 | 0.507438  | 6622 synuclein, alpha (non A4 component of amyloid precursor)                   |

|                                            |   |     |           |                                                                        |
|--------------------------------------------|---|-----|-----------|------------------------------------------------------------------------|
| GO platelet alpha granule                  | 1 | 10  | 0.507438  | 6812 syntaxin binding protein 1                                        |
| GO B cell receptor signaling pathway       | 1 | 10  | 0.507438  | 6850 spleen tyrosine kinase                                            |
| GO interleukin-1 receptor binding          | 1 | 10  | 0.507438  | 7100 toll-like receptor 5                                              |
| GO tumor necrosis factor receptor activit  | 1 | 10  | 0.507438  | 7133 tumor necrosis factor receptor superfamily, member 1B             |
| GO complement activation                   | 1 | 10  | 0.507438  | 731 complement component 8, alpha polypeptide                          |
| GO mRNA catabolic process                  | 1 | 10  | 0.507438  | 7538 zinc finger protein 36, C3H type, homolog (mouse)                 |
| GO XY body                                 | 1 | 10  | 0.507438  | 80714 pre-B-cell leukemia homeobox 4                                   |
| GO killing of cells of another organism    | 1 | 10  | 0.507438  | 8542 apolipoprotein L, 1                                               |
| GO calcium ion-dependent exocytosis        | 1 | 10  | 0.507438  | 85477 scinderin                                                        |
| GO cytokine binding                        | 1 | 10  | 0.507438  | 8646 chordin                                                           |
| GO embryonic digestive tract developme     | 1 | 10  | 0.507438  | 91461 protein kinase domain containing, cytoplasmic homolog (mouse)    |
| GO mRNA cap binding complex                | 1 | 10  | 0.507438  | 9271 piwi-like 1 (Drosophila)                                          |
| GO NAD metabolic process                   | 1 | 10  | 0.507438  | 93100 nicotinate phosphoribosyltransferase domain containing 1         |
| GO positive regulation of T cell activator | 1 | 10  | 0.507438  | 961 CD47 molecule                                                      |
| GO cellular component movement             | 7 | 98  | 0.5084993 | 27076 LY6/PLAUR domain containing 3                                    |
| GO cellular component movement             | 7 | 98  | 0.5084993 | 29116 myosin regulatory light chain interacting protein                |
| GO cellular component movement             | 7 | 98  | 0.5084993 | 3479 insulin-like growth factor 1 (somatomedin C)                      |
| GO cellular component movement             | 7 | 98  | 0.5084993 | 4486 macrophage stimulating 1 receptor (c-met-related tyrosine kinase) |
| GO cellular component movement             | 7 | 98  | 0.5084993 | 7170 tropomyosin 3                                                     |
| GO cellular component movement             | 7 | 98  | 0.5084993 | 8875 vanin 2                                                           |
| GO dendrite                                | 9 | 128 | 0.5146955 | 9788 metastasis suppressor 1                                           |
| GO dendrite                                | 9 | 128 | 0.5146955 | 154 adrenergic, beta-2-, receptor, surface                             |
| GO dendrite                                | 9 | 128 | 0.5146955 | 1813 dopamine receptor D2                                              |
| GO dendrite                                | 9 | 128 | 0.5146955 | 240 arachidonate 5-lipoxygenase                                        |
| GO dendrite                                | 9 | 128 | 0.5146955 | 3759 potassium inwardly-rectifying channel, subfamily J, member 2      |
| GO dendrite                                | 9 | 128 | 0.5146955 | 4856 nephroblastoma overexpressed gene                                 |
| GO dendrite                                | 9 | 128 | 0.5146955 | 5122 proprotein convertase subtilisin/kexin type 1                     |
| GO dendrite                                | 9 | 128 | 0.5146955 | 5873 RAB27A, member RAS oncogene family                                |
| GO dendrite                                | 9 | 128 | 0.5146955 | 885 cholecystokinin                                                    |
| GO dendrite                                | 9 | 128 | 0.5146955 | 8912 calcium channel, voltage-dependent, T type, alpha 1H subunit      |
| GO melanosome                              | 6 | 84  | 0.5165615 | 1508 cathepsin B                                                       |
| GO melanosome                              | 6 | 84  | 0.5165615 | 2040 stomatin                                                          |
| GO melanosome                              | 6 | 84  | 0.5165615 | 23682 RAB38, member RAS oncogene family                                |
| GO melanosome                              | 6 | 84  | 0.5165615 | 311 annexin A11                                                        |
| GO melanosome                              | 6 | 84  | 0.5165615 | 5873 RAB27A, member RAS oncogene family                                |
| GO melanosome                              | 6 | 84  | 0.5165615 | 682 basigin (Ok blood group)                                           |

|    |                                     |   |     |           |        |                                                                          |
|----|-------------------------------------|---|-----|-----------|--------|--------------------------------------------------------------------------|
| GO | mitochondrial intermembrane space   | 2 | 25  | 0.5173551 | 10628  | thioredoxin interacting protein                                          |
| GO | mitochondrial intermembrane space   | 2 | 25  | 0.5173551 | 64083  | golgi phosphoprotein 3 (coat-protein)                                    |
| GO | lipid biosynthetic process          | 2 | 25  | 0.5173551 | 2055   | ceroid-lipofuscinosis, neuronal 8 (epilepsy, progressive with mental ret |
| GO | lipid biosynthetic process          | 2 | 25  | 0.5173551 | 53947  | alpha 1,4-galactosyltransferase                                          |
| GO | glycoprotein binding                | 2 | 25  | 0.5173551 | 26270  | F-box protein 6                                                          |
| GO | glycoprotein binding                | 2 | 25  | 0.5173551 | 3689   | integrin, beta 2 (complement component 3 receptor 3 and 4 subunit)       |
| GO | heterotrimeric G-protein complex    | 2 | 25  | 0.5173551 | 2769   | guanine nucleotide binding protein (G protein), alpha 15 (Gq class)      |
| GO | heterotrimeric G-protein complex    | 2 | 25  | 0.5173551 | 8786   | regulator of G-protein signaling 11                                      |
| GO | fat cell differentiation            | 2 | 25  | 0.5173551 | 3643   | insulin receptor                                                         |
| GO | fat cell differentiation            | 2 | 25  | 0.5173551 | 79689  | STEAP family member 4                                                    |
| GO | osteoblast differentiation          | 2 | 25  | 0.5173551 | 3726   | jun B proto-oncogene                                                     |
| GO | osteoblast differentiation          | 2 | 25  | 0.5173551 | 4209   | myocyte enhancer factor 2D                                               |
| GO | stress fiber                        | 2 | 25  | 0.5173551 | 4486   | macrophage stimulating 1 receptor (c-met-related tyrosine kinase)        |
| GO | stress fiber                        | 2 | 25  | 0.5173551 | 5239   | phosphoglucomutase 5                                                     |
| GO | receptor-mediated endocytosis       | 3 | 40  | 0.5211403 | 10268  | receptor (G protein-coupled) activity modifying protein 3                |
| GO | receptor-mediated endocytosis       | 3 | 40  | 0.5211403 | 154    | adrenergic, beta-2-, receptor, surface                                   |
| GO | receptor-mediated endocytosis       | 3 | 40  | 0.5211403 | 6653   | sortilin-related receptor, L(DLR class) A repeats-containing             |
| GO | catalytic activity                  | 8 | 114 | 0.5219419 | 157855 | potassium channel, subfamily U, member 1                                 |
| GO | catalytic activity                  | 8 | 114 | 0.5219419 | 200150 | phospholipase D family, member 5                                         |
| GO | catalytic activity                  | 8 | 114 | 0.5219419 | 284716 | ribosomal modification protein rimK-like family member A                 |
| GO | catalytic activity                  | 8 | 114 | 0.5219419 | 343450 | potassium channel, subfamily T, member 2                                 |
| GO | catalytic activity                  | 8 | 114 | 0.5219419 | 5016   | oviductal glycoprotein 1, 120kDa                                         |
| GO | catalytic activity                  | 8 | 114 | 0.5219419 | 57494  | ribosomal modification protein rimK-like family member B                 |
| GO | catalytic activity                  | 8 | 114 | 0.5219419 | 79802  | HHIP-like 2                                                              |
| GO | catalytic activity                  | 8 | 114 | 0.5219419 | 94059  | leukocyte receptor cluster (LRC) member 9                                |
| GO | response to toxin                   | 4 | 55  | 0.5238895 | 2353   | FBJ murine osteosarcoma viral oncogene homolog                           |
| GO | response to toxin                   | 4 | 55  | 0.5238895 | 4129   | monoamine oxidase B                                                      |
| GO | response to toxin                   | 4 | 55  | 0.5238895 | 7097   | toll-like receptor 2                                                     |
| GO | response to toxin                   | 4 | 55  | 0.5238895 | 7099   | toll-like receptor 4                                                     |
| GO | cytoplasmic membrane-bounded ves    | 6 | 85  | 0.5283095 | 23048  | formin binding protein 1                                                 |
| GO | cytoplasmic membrane-bounded ves    | 6 | 85  | 0.5283095 | 259173 | ALS2 C-terminal like                                                     |
| GO | cytoplasmic membrane-bounded ves    | 6 | 85  | 0.5283095 | 55638  | Golgi-localized protein                                                  |
| GO | cytoplasmic membrane-bounded ves    | 6 | 85  | 0.5283095 | 627    | brain-derived neurotrophic factor                                        |
| GO | cytoplasmic membrane-bounded ves    | 6 | 85  | 0.5283095 | 7852   | chemokine (C-X-C motif) receptor 4                                       |
| GO | cytoplasmic membrane-bounded ves    | 6 | 85  | 0.5283095 | 8527   | diacylglycerol kinase, delta 130kDa                                      |
| GO | voltage-gated potassium channel cor | 6 | 85  | 0.5283095 | 27345  | potassium large conductance calcium-activated channel, subfamily M,      |

|                                        |    |     |           |                                                                            |
|----------------------------------------|----|-----|-----------|----------------------------------------------------------------------------|
| GO voltage-gated potassium channel con | 6  | 85  | 0.5283095 | 3773 potassium inwardly-rectifying channel, subfamily J, member 16         |
| GO voltage-gated potassium channel con | 6  | 85  | 0.5283095 | 3775 potassium channel, subfamily K, member 1                              |
| GO voltage-gated potassium channel con | 6  | 85  | 0.5283095 | 3783 potassium intermediate/small conductance calcium-activated channel,   |
| GO voltage-gated potassium channel con | 6  | 85  | 0.5283095 | 3786 potassium voltage-gated channel, KQT-like subfamily, member 3         |
| GO voltage-gated potassium channel con | 6  | 85  | 0.5283095 | 3790 potassium voltage-gated channel, delayed-rectifier, subfamily S, memb |
| GO magnesium ion binding               | 11 | 159 | 0.5283259 | 11213 interleukin-1 receptor-associated kinase 3                           |
| GO magnesium ion binding               | 11 | 159 | 0.5283259 | 148229 ATPase, class I, type 8B, member 3                                  |
| GO magnesium ion binding               | 11 | 159 | 0.5283259 | 150094 salt-inducible kinase 1                                             |
| GO magnesium ion binding               | 11 | 159 | 0.5283259 | 2026 enolase 2 (gamma, neuronal)                                           |
| GO magnesium ion binding               | 11 | 159 | 0.5283259 | 23387 SIK family kinase 3                                                  |
| GO magnesium ion binding               | 11 | 159 | 0.5283259 | 375449 microtubule associated serine/threonine kinase family member 4      |
| GO magnesium ion binding               | 11 | 159 | 0.5283259 | 5239 phosphoglucomutase 5                                                  |
| GO magnesium ion binding               | 11 | 159 | 0.5283259 | 6622 synuclein, alpha (non A4 component of amyloid precursor)              |
| GO magnesium ion binding               | 11 | 159 | 0.5283259 | 79895 ATPase, class I, type 8B, member 4                                   |
| GO magnesium ion binding               | 11 | 159 | 0.5283259 | 81788 NUAKE family, SNF1-like kinase, 2                                    |
| GO magnesium ion binding               | 11 | 159 | 0.5283259 | 9064 mitogen-activated protein kinase kinase kinase 6                      |
| GO negative regulation of cell cycle   | 3  | 41  | 0.5380605 | 23368 protein phosphatase 1, regulatory (inhibitor) subunit 13B            |
| GO negative regulation of cell cycle   | 3  | 41  | 0.5380605 | 6494 signal-induced proliferation-associated 1                             |
| GO negative regulation of cell cycle   | 3  | 41  | 0.5380605 | 652 bone morphogenetic protein 4                                           |
| GO protein import into nucleus         | 2  | 26  | 0.538725  | 10628 thioredoxin interacting protein                                      |
| GO protein import into nucleus         | 2  | 26  | 0.538725  | 55705 importin 9                                                           |
| GO triglyceride metabolic process      | 2  | 26  | 0.538725  | 2182 acyl-CoA synthetase long-chain family member 4                        |
| GO triglyceride metabolic process      | 2  | 26  | 0.538725  | 255738 proprotein convertase subtilisin/kexin type 9                       |
| GO skin development                    | 2  | 26  | 0.538725  | 2707 gap junction protein, beta 3, 31kDa                                   |
| GO skin development                    | 2  | 26  | 0.538725  | 412 steroid sulfatase (microsomal), isozyme S                              |
| GO terminal button                     | 2  | 26  | 0.538725  | 5025 purinergic receptor P2X, ligand-gated ion channel, 4                  |
| GO terminal button                     | 2  | 26  | 0.538725  | 885 cholecystokinin                                                        |
| GO embryo implantation                 | 2  | 26  | 0.538725  | 682 basigin (Ok blood group)                                               |
| GO embryo implantation                 | 2  | 26  | 0.538725  | 687 Kruppel-like factor 9                                                  |
| GO lamellipodium                       | 5  | 71  | 0.5390299 | 10252 sprouty homolog 1, antagonist of FGF signaling (Drosophila)          |
| GO lamellipodium                       | 5  | 71  | 0.5390299 | 152273 FYVE, RhoGEF and PH domain containing 5                             |
| GO lamellipodium                       | 5  | 71  | 0.5390299 | 1803 dipeptidyl-peptidase 4                                                |
| GO lamellipodium                       | 5  | 71  | 0.5390299 | 55740 enabled homolog (Drosophila)                                         |
| GO lamellipodium                       | 5  | 71  | 0.5390299 | 57147 SCY1-like 3 (S. cerevisiae)                                          |
| GO focal adhesion                      | 6  | 86  | 0.5399386 | 23092 Rho GTPase activating protein 26                                     |
| GO focal adhesion                      | 6  | 86  | 0.5399386 | 23371 tensin like C1 domain containing phosphatase (tensin 2)              |

|                                            |   |    |           |                                                                             |
|--------------------------------------------|---|----|-----------|-----------------------------------------------------------------------------|
| GO focal adhesion                          | 6 | 86 | 0.5399386 | 3678 integrin, alpha 5 (fibronectin receptor, alpha polypeptide)            |
| GO focal adhesion                          | 6 | 86 | 0.5399386 | 5239 phosphoglucomutase 5                                                   |
| GO focal adhesion                          | 6 | 86 | 0.5399386 | 55740 enabled homolog (Drosophila)                                          |
| GO focal adhesion                          | 6 | 86 | 0.5399386 | 7706 tripartite motif-containing 25                                         |
| GO dipeptidyl-peptidase activity           | 1 | 11 | 0.5411214 | 1803 dipeptidyl-peptidase 4                                                 |
| GO motor axon guidance                     | 1 | 11 | 0.5411214 | 1959 early growth response 2                                                |
| GO positive regulation of axon extension   | 1 | 11 | 0.5411214 | 2033 E1A binding protein p300                                               |
| GO negative regulation of JNK cascade      | 1 | 11 | 0.5411214 | 2122 MDS1 and EVI1 complex locus                                            |
| GO fibroblast growth factor binding        | 1 | 11 | 0.5411214 | 2263 fibroblast growth factor receptor 2                                    |
| GO DNA bending activity                    | 1 | 11 | 0.5411214 | 2296 forkhead box C1                                                        |
| GO maternal process involved in female     | 1 | 11 | 0.5411214 | 23780 apolipoprotein L, 2                                                   |
| GO sodium channel activity                 | 1 | 11 | 0.5411214 | 259232 sodium leak channel, non-selective                                   |
| GO SCF ubiquitin ligase complex            | 1 | 11 | 0.5411214 | 26270 F-box protein 6                                                       |
| GO positive regulation of vascular endotl  | 1 | 11 | 0.5411214 | 3678 integrin, alpha 5 (fibronectin receptor, alpha polypeptide)            |
| GO myelin sheath                           | 1 | 11 | 0.5411214 | 3709 inositol 1,4,5-triphosphate receptor, type 2                           |
| GO trophoctodermal cell differentiation    | 1 | 11 | 0.5411214 | 3726 jun B proto-oncogene                                                   |
| GO delayed rectifier potassium channel α   | 1 | 11 | 0.5411214 | 3790 potassium voltage-gated channel, delayed-rectifier, subfamily S, memb  |
| GO low-density lipoprotein receptor activ  | 1 | 11 | 0.5411214 | 3949 low density lipoprotein receptor                                       |
| GO actin filament polymerization           | 1 | 11 | 0.5411214 | 395 Rho GTPase activating protein 6                                         |
| GO positive regulation of epithelial to me | 1 | 11 | 0.5411214 | 4087 SMAD family member 2                                                   |
| GO positive regulation of neurogenesis     | 1 | 11 | 0.5411214 | 429 achaete-scute complex homolog 1 (Drosophila)                            |
| GO methionine biosynthetic process         | 1 | 11 | 0.5411214 | 4524 5,10-methylenetetrahydrofolate reductase (NADPH)                       |
| GO gamma-tubulin binding                   | 1 | 11 | 0.5411214 | 4692 necdin homolog (mouse)                                                 |
| GO FMN binding                             | 1 | 11 | 0.5411214 | 4842 nitric oxide synthase 1 (neuronal)                                     |
| GO nitric oxide biosynthetic process       | 1 | 11 | 0.5411214 | 4842 nitric oxide synthase 1 (neuronal)                                     |
| GO oligodendrocyte differentiation         | 1 | 11 | 0.5411214 | 4851 Notch homolog 1, translocation-associated (Drosophila)                 |
| GO positive regulation of calcium ion tra  | 1 | 11 | 0.5411214 | 5025 purinergic receptor P2X, ligand-gated ion channel, 4                   |
| GO Ras GTPase binding                      | 1 | 11 | 0.5411214 | 57139 ral guanine nucleotide dissociation stimulator-like 3                 |
| GO intermediate filament cytoskeleton      | 1 | 11 | 0.5411214 | 573 BCL2-associated athanogene                                              |
| GO neuropeptide receptor activity          | 1 | 11 | 0.5411214 | 57537 sortilin-related VPS10 domain containing receptor 2                   |
| GO replication fork                        | 1 | 11 | 0.5411214 | 604 B-cell CLL/lymphoma 6                                                   |
| GO npBAF complex                           | 1 | 11 | 0.5411214 | 6604 SWI/SNF related, matrix associated, actin dependent regulator of chrom |
| GO cellular response to oxidative stress   | 1 | 11 | 0.5411214 | 6622 synuclein, alpha (non A4 component of amyloid precursor)               |
| GO response to magnesium ion               | 1 | 11 | 0.5411214 | 6622 synuclein, alpha (non A4 component of amyloid precursor)               |
| GO positive regulation of interferon-gam   | 1 | 11 | 0.5411214 | 7098 toll-like receptor 3                                                   |
| GO positive regulation of interferon-gam   | 1 | 11 | 0.5411214 | 7099 toll-like receptor 4                                                   |

|    |                                                       |   |     |           |                                                                                 |
|----|-------------------------------------------------------|---|-----|-----------|---------------------------------------------------------------------------------|
| GO | initiation of viral infection                         | 1 | 11  | 0.5411214 | 7852 chemokine (C-X-C motif) receptor 4                                         |
| GO | positive regulation of erythrocyte dif                | 1 | 11  | 0.5411214 | 91 activin A receptor, type IB                                                  |
| GO | phosphatidylinositol-3,4-bisphosphat                  | 1 | 11  | 0.5411214 | 91404 SEC14 and spectrin domains 1                                              |
| GO | pyridine nucleotide biosynthetic proc                 | 1 | 11  | 0.5411214 | 93100 nicotinate phosphoribosyltransferase domain containing 1                  |
| GO | P-P-bond-hydrolysis-driven protein tr                 | 1 | 11  | 0.5411214 | 9804 translocase of outer mitochondrial membrane 20 homolog (yeast)             |
| GO | bile acid metabolic process                           | 1 | 11  | 0.5411214 | 9971 nuclear receptor subfamily 1, group H, member 4                            |
| GO | oocyte maturation                                     | 1 | 11  | 0.5411214 | 9985 REC8 homolog (yeast)                                                       |
| GO | transcription regulator activity                      | 7 | 102 | 0.5515791 | 124 alcohol dehydrogenase 1A (class I), alpha polypeptide                       |
| GO | transcription regulator activity                      | 7 | 102 | 0.5515791 | 23648 single stranded DNA binding protein 3                                     |
| GO | transcription regulator activity                      | 7 | 102 | 0.5515791 | 2624 GATA binding protein 2                                                     |
| GO | transcription regulator activity                      | 7 | 102 | 0.5515791 | 4778 nuclear factor (erythroid-derived 2), 45kDa                                |
| GO | transcription regulator activity                      | 7 | 102 | 0.5515791 | 4849 CCR4-NOT transcription complex, subunit 3                                  |
| GO | transcription regulator activity                      | 7 | 102 | 0.5515791 | 5371 promyelocytic leukemia                                                     |
| GO | transcription regulator activity                      | 7 | 102 | 0.5515791 | 6604 SWI/SNF related, matrix associated, actin dependent regulator of chromatin |
| GO | synaptic vesicle membrane                             | 3 | 42  | 0.5546329 | 143425 synaptotagmin IX                                                         |
| GO | synaptic vesicle membrane                             | 3 | 42  | 0.5546329 | 23208 synaptotagmin XI                                                          |
| GO | synaptic vesicle membrane                             | 3 | 42  | 0.5546329 | 6857 synaptotagmin I                                                            |
| GO | JAK-STAT cascade                                      | 2 | 27  | 0.5594311 | 23529 cardiotrophin-like cytokine factor 1                                      |
| GO | JAK-STAT cascade                                      | 2 | 27  | 0.5594311 | 9021 suppressor of cytokine signaling 3                                         |
| GO | negative regulation of Wnt receptor signaling pathway | 2 | 27  | 0.5594311 | 27123 dickkopf homolog 2 (Xenopus laevis)                                       |
| GO | negative regulation of Wnt receptor signaling pathway | 2 | 27  | 0.5594311 | 8313 axin 2                                                                     |
| GO | phagocytosis                                          | 2 | 27  | 0.5594311 | 311 annexin A11                                                                 |
| GO | phagocytosis                                          | 2 | 27  | 0.5594311 | 929 CD14 molecule                                                               |
| GO | cell aging                                            | 2 | 27  | 0.5594311 | 3845 v-Ki-ras2 Kirsten rat sarcoma viral oncogene homolog                       |
| GO | cell aging                                            | 2 | 27  | 0.5594311 | 5371 promyelocytic leukemia                                                     |
| GO | meiosis                                               | 4 | 58  | 0.5665303 | 143689 piwi-like 4 (Drosophila)                                                 |
| GO | meiosis                                               | 4 | 58  | 0.5665303 | 55124 piwi-like 2 (Drosophila)                                                  |
| GO | meiosis                                               | 4 | 58  | 0.5665303 | 9271 piwi-like 1 (Drosophila)                                                   |
| GO | meiosis                                               | 4 | 58  | 0.5665303 | 9985 REC8 homolog (yeast)                                                       |
| GO | structural constituent of muscle                      | 3 | 43  | 0.5708446 | 27295 PDZ and LIM domain 3                                                      |
| GO | structural constituent of muscle                      | 3 | 43  | 0.5708446 | 84033 obscurin, cytoskeletal calmodulin and titin-interacting RhoGEF            |
| GO | structural constituent of muscle                      | 3 | 43  | 0.5708446 | 8736 myomesin 1, 185kDa                                                         |
| GO | ligand-dependent nuclear receptor binding activity    | 1 | 12  | 0.5725031 | 10891 peroxisome proliferator-activated receptor gamma, coactivator 1 alpha     |
| GO | lysophospholipase activity                            | 1 | 12  | 0.5725031 | 11343 monoglyceride lipase                                                      |
| GO | response to chemical stimulus                         | 1 | 12  | 0.5725031 | 1139 cholinergic receptor, nicotinic, alpha 7                                   |
| GO | endothelial cell migration                            | 1 | 12  | 0.5725031 | 1803 dipeptidyl-peptidase 4                                                     |

|    |                                        |   |    |           |       |                                                                                  |
|----|----------------------------------------|---|----|-----------|-------|----------------------------------------------------------------------------------|
| GO | release of sequestered calcium ion in  | 1 | 12 | 0.5725031 | 1813  | dopamine receptor D2                                                             |
| GO | ephrin receptor activity               | 1 | 12 | 0.5725031 | 1969  | EPH receptor A2                                                                  |
| GO | acetyltransferase activity             | 1 | 12 | 0.5725031 | 2033  | E1A binding protein p300                                                         |
| GO | arylsulfatase activity                 | 1 | 12 | 0.5725031 | 22901 | arylsulfatase G                                                                  |
| GO | glutamate receptor activity            | 1 | 12 | 0.5725031 | 2911  | glutamate receptor, metabotropic 1                                               |
| GO | estradiol 17-beta-dehydrogenase act    | 1 | 12 | 0.5725031 | 3294  | hydroxysteroid (17-beta) dehydrogenase 2                                         |
| GO | male meiosis                           | 1 | 12 | 0.5725031 | 3306  | heat shock 70kDa protein 2                                                       |
| GO | positive regulation of peptidyl-serine | 1 | 12 | 0.5725031 | 3569  | interleukin 6 (interferon, beta 2)                                               |
| GO | cGMP biosynthetic process              | 1 | 12 | 0.5725031 | 358   | aquaporin 1 (Colton blood group)                                                 |
| GO | activation of protein kinase activity  | 1 | 12 | 0.5725031 | 3643  | insulin receptor                                                                 |
| GO | platelet-derived growth factor recept  | 1 | 12 | 0.5725031 | 3678  | integrin, alpha 5 (fibronectin receptor, alpha polypeptide)                      |
| GO | smooth muscle contraction              | 1 | 12 | 0.5725031 | 3827  | kininogen 1                                                                      |
| GO | endochondral ossification              | 1 | 12 | 0.5725031 | 4209  | myocyte enhancer factor 2D                                                       |
| GO | hydrolase activity, acting on carbon-r | 1 | 12 | 0.5725031 | 4817  | nitrilase 1                                                                      |
| GO | mitochondrial ATP synthesis coupled    | 1 | 12 | 0.5725031 | 498   | ATP synthase, H <sup>+</sup> transporting, mitochondrial F1 complex, alpha subun |
| GO | triglyceride homeostasis               | 1 | 12 | 0.5725031 | 51085 | MLX interacting protein-like                                                     |
| GO | axon terminus                          | 1 | 12 | 0.5725031 | 5122  | proprotein convertase subtilisin/kexin type 1                                    |
| GO | costamere                              | 1 | 12 | 0.5725031 | 5239  | phosphoglucomutase 5                                                             |
| GO | histone methylation                    | 1 | 12 | 0.5725031 | 54904 | Wolf-Hirschhorn syndrome candidate 1-like 1                                      |
| GO | iron-sulfur cluster binding            | 1 | 12 | 0.5725031 | 55140 | elongation protein 3 homolog ( <i>S. cerevisiae</i> )                            |
| GO | calcium channel regulator activity     | 1 | 12 | 0.5725031 | 57620 | stromal interaction molecule 2                                                   |
| GO | positive regulation of cellular compo  | 1 | 12 | 0.5725031 | 604   | B-cell CLL/lymphoma 6                                                            |
| GO | voltage-gated sodium channel compl     | 1 | 12 | 0.5725031 | 6330  | sodium channel, voltage-gated, type IV, beta                                     |
| GO | positive regulation of innate immune   | 1 | 12 | 0.5725031 | 64127 | nucleotide-binding oligomerization domain containing 2                           |
| GO | dorsal/ventral neural tube patterning  | 1 | 12 | 0.5725031 | 652   | bone morphogenetic protein 4                                                     |
| GO | nBAF complex                           | 1 | 12 | 0.5725031 | 6604  | SWI/SNF related, matrix associated, actin dependent regulator of chrom           |
| GO | alpha-tubulin binding                  | 1 | 12 | 0.5725031 | 6622  | synuclein, alpha (non A4 component of amyloid precursor)                         |
| GO | ferrous iron binding                   | 1 | 12 | 0.5725031 | 6622  | synuclein, alpha (non A4 component of amyloid precursor)                         |
| GO | glutamate signaling pathway            | 1 | 12 | 0.5725031 | 6751  | somatostatin receptor 1                                                          |
| GO | T cell receptor complex                | 1 | 12 | 0.5725031 | 6850  | spleen tyrosine kinase                                                           |
| GO | negative regulation of cyclin-depend   | 1 | 12 | 0.5725031 | 7026  | nuclear receptor subfamily 2, group F, member 2                                  |
| GO | regulation of muscle contraction       | 1 | 12 | 0.5725031 | 7170  | tropomyosin 3                                                                    |
| GO | NLS-bearing substrate import into nu   | 1 | 12 | 0.5725031 | 7227  | trichorhinophalangeal syndrome I                                                 |
| GO | mammary gland alveolus developme       | 1 | 12 | 0.5725031 | 8600  | tumor necrosis factor (ligand) superfamily, member 11                            |
| GO | regulation of lipid metabolic process  | 1 | 12 | 0.5725031 | 8660  | insulin receptor substrate 2                                                     |
| GO | cholesterol transporter activity       | 1 | 12 | 0.5725031 | 9619  | ATP-binding cassette, sub-family G (WHITE), member 1                             |



|                                           |   |    |           |                                                                            |
|-------------------------------------------|---|----|-----------|----------------------------------------------------------------------------|
| GO protein oligomerization                | 2 | 28 | 0.579464  | 10439 olfactomedin 1                                                       |
| GO protein oligomerization                | 2 | 28 | 0.579464  | 64127 nucleotide-binding oligomerization domain containing 2               |
| GO activation of phospholipase C activity | 2 | 28 | 0.579464  | 183 angiotensinogen (serpin peptidase inhibitor, clade A, member 8)        |
| GO activation of phospholipase C activity | 2 | 28 | 0.579464  | 56923 neuromedin U receptor 2                                              |
| GO negative regulation of transforming g  | 2 | 28 | 0.579464  | 2122 MDS1 and EVI1 complex locus                                           |
| GO negative regulation of transforming g  | 2 | 28 | 0.579464  | 3175 one cut homeobox 1                                                    |
| GO small GTPase regulator activity        | 2 | 28 | 0.579464  | 23043 TRAF2 and NCK interacting kinase                                     |
| GO small GTPase regulator activity        | 2 | 28 | 0.579464  | 5900 ral guanine nucleotide dissociation stimulator                        |
| GO antigen processing and presentation    | 2 | 28 | 0.579464  | 3134 major histocompatibility complex, class I, F                          |
| GO antigen processing and presentation    | 2 | 28 | 0.579464  | 5698 proteasome (prosome, macropain) subunit, beta type, 9 (large multifur |
| GO regulation of cell migration           | 2 | 28 | 0.579464  | 3911 laminin, alpha 5                                                      |
| GO regulation of cell migration           | 2 | 28 | 0.579464  | 6750 somatostatin                                                          |
| GO ruffle membrane                        | 2 | 29 | 0.5988191 | 3678 integrin, alpha 5 (fibronectin receptor, alpha polypeptide)           |
| GO ruffle membrane                        | 2 | 29 | 0.5988191 | 5152 phosphodiesterase 9A                                                  |
| GO chaperone binding                      | 2 | 29 | 0.5988191 | 5071 Parkinson disease (autosomal recessive, juvenile) 2, parkin           |
| GO chaperone binding                      | 2 | 29 | 0.5988191 | 5122 proprotein convertase subtilisin/kexin type 1                         |
| GO cyclin-dependent protein kinase activ  | 2 | 29 | 0.5988191 | 5129 cyclin-dependent kinase 18                                            |
| GO cyclin-dependent protein kinase activ  | 2 | 29 | 0.5988191 | 5218 cyclin-dependent kinase 14                                            |
| GO phosphate binding                      | 1 | 13 | 0.6017402 | 10568 solute carrier family 34 (sodium phosphate), member 2                |
| GO cAMP biosynthetic process              | 1 | 13 | 0.6017402 | 112 adenylate cyclase 6                                                    |
| GO folic acid binding                     | 1 | 13 | 0.6017402 | 113235 solute carrier family 46 (folate transporter), member 1             |
| GO cell wall macromolecule catabolic pro  | 1 | 13 | 0.6017402 | 135112 nuclear receptor coactivator 7                                      |
| GO regulation of cell differentiation     | 1 | 13 | 0.6017402 | 150094 salt-inducible kinase 1                                             |
| GO bone resorption                        | 1 | 13 | 0.6017402 | 154 adrenergic, beta-2-, receptor, surface                                 |
| GO steroid hormone receptor signaling p   | 1 | 13 | 0.6017402 | 158800 RhoX homeobox family, member 1                                      |
| GO epidermal growth factor receptor bin   | 1 | 13 | 0.6017402 | 1839 heparin-binding EGF-like growth factor                                |
| GO positive regulation of hormone secre   | 1 | 13 | 0.6017402 | 1906 endothelin 1                                                          |
| GO endosome organization                  | 1 | 13 | 0.6017402 | 259173 ALS2 C-terminal like                                                |
| GO receptor signaling complex scaffold a  | 1 | 13 | 0.6017402 | 26119 low density lipoprotein receptor adaptor protein 1                   |
| GO fibroblast growth factor receptor bin  | 1 | 13 | 0.6017402 | 26281 fibroblast growth factor 20                                          |
| GO superoxide anion generation            | 1 | 13 | 0.6017402 | 27035 NADPH oxidase 1                                                      |
| GO serotonin receptor activity            | 1 | 13 | 0.6017402 | 3355 5-hydroxytryptamine (serotonin) receptor 1F                           |
| GO glial cell differentiation             | 1 | 13 | 0.6017402 | 3479 insulin-like growth factor 1 (somatomedin C)                          |
| GO myoblast differentiation               | 1 | 13 | 0.6017402 | 3479 insulin-like growth factor 1 (somatomedin C)                          |
| GO extracellular matrix binding           | 1 | 13 | 0.6017402 | 3491 cysteine-rich, angiogenic inducer, 61                                 |
| GO oligodendrocyte development            | 1 | 13 | 0.6017402 | 429 achaete-scute complex homolog 1 (Drosophila)                           |

|                                                      |   |    |           |                                                                                        |
|------------------------------------------------------|---|----|-----------|----------------------------------------------------------------------------------------|
| GO hydrogen ion transporting ATP synthase            | 1 | 13 | 0.6017402 | 498 ATP synthase, H <sup>+</sup> transporting, mitochondrial F1 complex, alpha subunit |
| GO protein autoubiquitination                        | 1 | 13 | 0.6017402 | 5071 Parkinson disease (autosomal recessive, juvenile) 2, parkin                       |
| GO retrograde transport, endosome to Golgi           | 1 | 13 | 0.6017402 | 51272 blocked early in transport 1 homolog ( <i>S. cerevisiae</i> )-like               |
| GO transcription elongation factor complex           | 1 | 13 | 0.6017402 | 55140 elongation protein 3 homolog ( <i>S. cerevisiae</i> )                            |
| GO regulation of protein kinase activity             | 1 | 13 | 0.6017402 | 5577 protein kinase, cAMP-dependent, regulatory, type II, beta                         |
| GO organic anion transport                           | 1 | 13 | 0.6017402 | 55867 solute carrier family 22 (organic anion/urate transporter), member 11            |
| GO regulation of smooth muscle contraction           | 1 | 13 | 0.6017402 | 56923 neuromedin U receptor 2                                                          |
| GO hippo signaling pathway                           | 1 | 13 | 0.6017402 | 60485 salvador homolog 1 ( <i>Drosophila</i> )                                         |
| GO negative regulation of phosphorylation            | 1 | 13 | 0.6017402 | 652 bone morphogenetic protein 4                                                       |
| GO low-density lipoprotein binding                   | 1 | 13 | 0.6017402 | 6653 sortilin-related receptor, L(DLR class) A repeats-containing                      |
| GO myosin binding                                    | 1 | 13 | 0.6017402 | 84059 G protein-coupled receptor 98                                                    |
| GO lipid homeostasis                                 | 1 | 13 | 0.6017402 | 8660 insulin receptor substrate 2                                                      |
| GO T cell homeostasis                                | 1 | 13 | 0.6017402 | 8740 tumor necrosis factor (ligand) superfamily, member 14                             |
| GO response to bacterium                             | 1 | 13 | 0.6017402 | 9021 suppressor of cytokine signaling 3                                                |
| GO high-density lipoprotein particle removal         | 1 | 13 | 0.6017402 | 9619 ATP-binding cassette, sub-family G (WHITE), member 1                              |
| GO DNA-directed RNA polymerase II, core              | 1 | 14 | 0.6289792 | 10891 peroxisome proliferator-activated receptor gamma, coactivator 1 alpha            |
| GO senescence                                        | 1 | 14 | 0.6289792 | 11200 CHK2 checkpoint homolog ( <i>S. pombe</i> )                                      |
| GO dynein complex                                    | 1 | 14 | 0.6289792 | 144132 dynein heavy chain domain 1                                                     |
| GO nuclear heterochromatin                           | 1 | 14 | 0.6289792 | 2296 forkhead box C1                                                                   |
| GO DNA methylation                                   | 1 | 14 | 0.6289792 | 2353 FBJ murine osteosarcoma viral oncogene homolog                                    |
| GO cellular response to starvation                   | 1 | 14 | 0.6289792 | 255738 proprotein convertase subtilisin/kexin type 9                                   |
| GO membrane protein ectodomain proteolysis           | 1 | 14 | 0.6289792 | 25825 beta-site APP-cleaving enzyme 2                                                  |
| GO regulation of action potential                    | 1 | 14 | 0.6289792 | 27345 potassium large conductance calcium-activated channel, subfamily M,              |
| GO anatomical structure formation involving          | 1 | 14 | 0.6289792 | 2737 GLI family zinc finger 3                                                          |
| GO positive regulation of transforming growth factor | 1 | 14 | 0.6289792 | 28996 homeodomain interacting protein kinase 2                                         |
| GO regulation of transforming growth factor          | 1 | 14 | 0.6289792 | 4087 SMAD family member 2                                                              |
| GO phosphoinositide phosphorylation                  | 1 | 14 | 0.6289792 | 5295 phosphoinositide-3-kinase, regulatory subunit 1 (alpha)                           |
| GO 3'-5' exonuclease activity                        | 1 | 14 | 0.6289792 | 54932 exonuclease 3'-5' domain containing 3                                            |
| GO cytokine production                               | 1 | 14 | 0.6289792 | 5724 platelet-activating factor receptor                                               |
| GO microtubule-based flagellum                       | 1 | 14 | 0.6289792 | 64064 3-oxoacid CoA transferase 2                                                      |
| GO response to interferon-gamma                      | 1 | 14 | 0.6289792 | 6622 synuclein, alpha (non A4 component of amyloid precursor)                          |
| GO tropomyosin binding                               | 1 | 14 | 0.6289792 | 7111 tropomodulin 1                                                                    |
| GO filamentous actin                                 | 1 | 14 | 0.6289792 | 7170 tropomyosin 3                                                                     |
| GO voltage-gated potassium channel activity          | 3 | 63 | 0.989     | 10008 potassium voltage-gated channel, Isk-related family, member 3                    |
| GO voltage-gated potassium channel activity          | 3 | 63 | 0.989     | 3786 potassium voltage-gated channel, KQT-like subfamily, member 3                     |
| GO voltage-gated potassium channel activity          | 3 | 63 | 0.989     | 8514 potassium voltage-gated channel, shaker-related subfamily, beta member            |

|                           |     |      |       |                                                                                 |
|---------------------------|-----|------|-------|---------------------------------------------------------------------------------|
| GO chromatin modification | 11  | 204  | 0.989 | 10014 histone deacetylase 5                                                     |
| GO chromatin modification | 11  | 204  | 0.989 | 151636 deltex 3-like (Drosophila)                                               |
| GO chromatin modification | 11  | 204  | 0.989 | 23081 lysine (K)-specific demethylase 4C                                        |
| GO chromatin modification | 11  | 204  | 0.989 | 23492 chromobox homolog 7                                                       |
| GO chromatin modification | 11  | 204  | 0.989 | 23774 bromodomain containing 1                                                  |
| GO chromatin modification | 11  | 204  | 0.989 | 54904 Wolf-Hirschhorn syndrome candidate 1-like 1                               |
| GO chromatin modification | 11  | 204  | 0.989 | 55693 lysine (K)-specific demethylase 4D                                        |
| GO chromatin modification | 11  | 204  | 0.989 | 55870 ash1 (absent, small, or homeotic)-like (Drosophila)                       |
| GO chromatin modification | 11  | 204  | 0.989 | 6604 SWI/SNF related, matrix associated, actin dependent regulator of chromatin |
| GO chromatin modification | 11  | 204  | 0.989 | 7404 ubiquitously transcribed tetratricopeptide repeat gene, Y-linked           |
| GO chromatin modification | 11  | 204  | 0.989 | 9734 histone deacetylase 9                                                      |
| GO chromatin organization | 1   | 19   | 0.989 | 10014 histone deacetylase 5                                                     |
| GO chromatin remodeling   | 2   | 46   | 0.989 | 10014 histone deacetylase 5                                                     |
| GO chromatin remodeling   | 2   | 46   | 0.989 | 3169 forkhead box A1                                                            |
| GO cytoplasm              | 293 | 4355 | 0.989 | 10014 histone deacetylase 5                                                     |
| GO cytoplasm              | 293 | 4355 | 0.989 | 10023 frequently rearranged in advanced T-cell lymphomas                        |
| GO cytoplasm              | 293 | 4355 | 0.989 | 1009 cadherin 11, type 2, OB-cadherin (osteoblast)                              |
| GO cytoplasm              | 293 | 4355 | 0.989 | 10116 fem-1 homolog b (C. elegans)                                              |
| GO cytoplasm              | 293 | 4355 | 0.989 | 10156 RAS p21 protein activator 4                                               |
| GO cytoplasm              | 293 | 4355 | 0.989 | 10221 tribbles homolog 1 (Drosophila)                                           |
| GO cytoplasm              | 293 | 4355 | 0.989 | 10252 sprouty homolog 1, antagonist of FGF signaling (Drosophila)               |
| GO cytoplasm              | 293 | 4355 | 0.989 | 10253 sprouty homolog 2 (Drosophila)                                            |
| GO cytoplasm              | 293 | 4355 | 0.989 | 10335 murine retrovirus integration site 1 homolog                              |
| GO cytoplasm              | 293 | 4355 | 0.989 | 10346 tripartite motif-containing 22                                            |
| GO cytoplasm              | 293 | 4355 | 0.989 | 10397 N-myc downstream regulated 1                                              |
| GO cytoplasm              | 293 | 4355 | 0.989 | 10435 CDC42 effector protein (Rho GTPase binding) 2                             |
| GO cytoplasm              | 293 | 4355 | 0.989 | 10561 interferon-induced protein 44                                             |
| GO cytoplasm              | 293 | 4355 | 0.989 | 10628 thioredoxin interacting protein                                           |
| GO cytoplasm              | 293 | 4355 | 0.989 | 10766 transducer of ERBB2, 2                                                    |
| GO cytoplasm              | 293 | 4355 | 0.989 | 1080 cystic fibrosis transmembrane conductance regulator (ATP-binding cassette) |
| GO cytoplasm              | 293 | 4355 | 0.989 | 10811 NADPH oxidase activator 1                                                 |
| GO cytoplasm              | 293 | 4355 | 0.989 | 10942 protease, serine, 21 (testisin)                                           |
| GO cytoplasm              | 293 | 4355 | 0.989 | 10964 interferon-induced protein 44-like                                        |
| GO cytoplasm              | 293 | 4355 | 0.989 | 11030 RNA binding protein with multiple splicing                                |
| GO cytoplasm              | 293 | 4355 | 0.989 | 11043 midline 2                                                                 |
| GO cytoplasm              | 293 | 4355 | 0.989 | 11074 tripartite motif-containing 31                                            |

|              |     |      |       |                                                                  |
|--------------|-----|------|-------|------------------------------------------------------------------|
| GO cytoplasm | 293 | 4355 | 0.989 | 11078 TRIO and F-actin binding protein                           |
| GO cytoplasm | 293 | 4355 | 0.989 | 11155 LIM domain binding 3                                       |
| GO cytoplasm | 293 | 4355 | 0.989 | 11213 interleukin-1 receptor-associated kinase 3                 |
| GO cytoplasm | 293 | 4355 | 0.989 | 113235 solute carrier family 46 (folate transporter), member 1   |
| GO cytoplasm | 293 | 4355 | 0.989 | 113263 glucocorticoid induced transcript 1                       |
| GO cytoplasm | 293 | 4355 | 0.989 | 114569 mal, T-cell differentiation protein 2                     |
| GO cytoplasm | 293 | 4355 | 0.989 | 1152 creatine kinase, brain                                      |
| GO cytoplasm | 293 | 4355 | 0.989 | 115265 DNA-damage-inducible transcript 4-like                    |
| GO cytoplasm | 293 | 4355 | 0.989 | 116113 forkhead box P4                                           |
| GO cytoplasm | 293 | 4355 | 0.989 | 116984 ArfGAP with RhoGAP domain, ankyrin repeat and PH domain 2 |
| GO cytoplasm | 293 | 4355 | 0.989 | 1193 chloride intracellular channel 2                            |
| GO cytoplasm | 293 | 4355 | 0.989 | 123 perilipin 2                                                  |
| GO cytoplasm | 293 | 4355 | 0.989 | 124 alcohol dehydrogenase 1A (class I), alpha polypeptide        |
| GO cytoplasm | 293 | 4355 | 0.989 | 125 alcohol dehydrogenase 1B (class I), beta polypeptide         |
| GO cytoplasm | 293 | 4355 | 0.989 | 127933 U2AF homology motif (UHM) kinase 1                        |
| GO cytoplasm | 293 | 4355 | 0.989 | 134549 shroom family member 1                                    |
| GO cytoplasm | 293 | 4355 | 0.989 | 1373 carbamoyl-phosphate synthetase 1, mitochondrial             |
| GO cytoplasm | 293 | 4355 | 0.989 | 1382 cellular retinoic acid binding protein 2                    |
| GO cytoplasm | 293 | 4355 | 0.989 | 140901 serine/threonine kinase 35                                |
| GO cytoplasm | 293 | 4355 | 0.989 | 143689 piwi-like 4 (Drosophila)                                  |
| GO cytoplasm | 293 | 4355 | 0.989 | 148170 CDC42 effector protein (Rho GTPase binding) 5             |
| GO cytoplasm | 293 | 4355 | 0.989 | 150094 salt-inducible kinase 1                                   |
| GO cytoplasm | 293 | 4355 | 0.989 | 1508 cathepsin B                                                 |
| GO cytoplasm | 293 | 4355 | 0.989 | 151636 deltex 3-like (Drosophila)                                |
| GO cytoplasm | 293 | 4355 | 0.989 | 152273 FYVE, RhoGEF and PH domain containing 5                   |
| GO cytoplasm | 293 | 4355 | 0.989 | 1540 cylindromatosis (turban tumor syndrome)                     |
| GO cytoplasm | 293 | 4355 | 0.989 | 154043 CNKSR family member 3                                     |
| GO cytoplasm | 293 | 4355 | 0.989 | 154810 angiominin like 1                                         |
| GO cytoplasm | 293 | 4355 | 0.989 | 157506 retinol dehydrogenase 10 (all-trans)                      |
| GO cytoplasm | 293 | 4355 | 0.989 | 157638 family with sequence similarity 84, member B              |
| GO cytoplasm | 293 | 4355 | 0.989 | 1612 death-associated protein kinase 1                           |
| GO cytoplasm | 293 | 4355 | 0.989 | 1755 deleted in malignant brain tumors 1                         |
| GO cytoplasm | 293 | 4355 | 0.989 | 1785 dynamin 2                                                   |
| GO cytoplasm | 293 | 4355 | 0.989 | 1820 AT rich interactive domain 3A (BRIGHT-like)                 |
| GO cytoplasm | 293 | 4355 | 0.989 | 1821 dystrophin related protein 2                                |
| GO cytoplasm | 293 | 4355 | 0.989 | 1822 atrophin 1                                                  |

|              |     |      |       |                                                                                |
|--------------|-----|------|-------|--------------------------------------------------------------------------------|
| GO cytoplasm | 293 | 4355 | 0.989 | 1906 endothelin 1                                                              |
| GO cytoplasm | 293 | 4355 | 0.989 | 1915 eukaryotic translation elongation factor 1 alpha 1                        |
| GO cytoplasm | 293 | 4355 | 0.989 | 1958 early growth response 1                                                   |
| GO cytoplasm | 293 | 4355 | 0.989 | 196383 Rab interacting lysosomal protein-like 2                                |
| GO cytoplasm | 293 | 4355 | 0.989 | 1983 eukaryotic translation initiation factor 5                                |
| GO cytoplasm | 293 | 4355 | 0.989 | 1999 E74-like factor 3 (ets domain transcription factor, epithelial-specific ) |
| GO cytoplasm | 293 | 4355 | 0.989 | 2026 enolase 2 (gamma, neuronal)                                               |
| GO cytoplasm | 293 | 4355 | 0.989 | 2033 E1A binding protein p300                                                  |
| GO cytoplasm | 293 | 4355 | 0.989 | 2039 erythrocyte membrane protein band 4.9 (dematin)                           |
| GO cytoplasm | 293 | 4355 | 0.989 | 2066 v-erb-a erythroblastic leukemia viral oncogene homolog 4 (avian)          |
| GO cytoplasm | 293 | 4355 | 0.989 | 2263 fibroblast growth factor receptor 2                                       |
| GO cytoplasm | 293 | 4355 | 0.989 | 22906 trafficking protein, kinesin binding 1                                   |
| GO cytoplasm | 293 | 4355 | 0.989 | 23035 PH domain and leucine rich repeat protein phosphatase 2                  |
| GO cytoplasm | 293 | 4355 | 0.989 | 23043 TRAF2 and NCK interacting kinase                                         |
| GO cytoplasm | 293 | 4355 | 0.989 | 23048 formin binding protein 1                                                 |
| GO cytoplasm | 293 | 4355 | 0.989 | 23092 Rho GTPase activating protein 26                                         |
| GO cytoplasm | 293 | 4355 | 0.989 | 23095 kinesin family member 1B                                                 |
| GO cytoplasm | 293 | 4355 | 0.989 | 23263 MCF.2 cell line derived transforming sequence-like                       |
| GO cytoplasm | 293 | 4355 | 0.989 | 23303 kinesin family member 13B                                                |
| GO cytoplasm | 293 | 4355 | 0.989 | 23365 Rho guanine nucleotide exchange factor (GEF) 12                          |
| GO cytoplasm | 293 | 4355 | 0.989 | 23368 protein phosphatase 1, regulatory (inhibitor) subunit 13B                |
| GO cytoplasm | 293 | 4355 | 0.989 | 23373 CREB regulated transcription coactivator 1                               |
| GO cytoplasm | 293 | 4355 | 0.989 | 23387 SIK family kinase 3                                                      |
| GO cytoplasm | 293 | 4355 | 0.989 | 23476 bromodomain containing 4                                                 |
| GO cytoplasm | 293 | 4355 | 0.989 | 23604 death-associated protein kinase 2                                        |
| GO cytoplasm | 293 | 4355 | 0.989 | 23650 tripartite motif-containing 29                                           |
| GO cytoplasm | 293 | 4355 | 0.989 | 23780 apolipoprotein L, 2                                                      |
| GO cytoplasm | 293 | 4355 | 0.989 | 240 arachidonate 5-lipoxygenase                                                |
| GO cytoplasm | 293 | 4355 | 0.989 | 2517 fucosidase, alpha-L- 1, tissue                                            |
| GO cytoplasm | 293 | 4355 | 0.989 | 257019 FERM domain containing 3                                                |
| GO cytoplasm | 293 | 4355 | 0.989 | 2571 glutamate decarboxylase 1 (brain, 67kDa)                                  |
| GO cytoplasm | 293 | 4355 | 0.989 | 259173 ALS2 C-terminal like                                                    |
| GO cytoplasm | 293 | 4355 | 0.989 | 25946 zinc finger protein 385A                                                 |
| GO cytoplasm | 293 | 4355 | 0.989 | 25956 SEC31 homolog B (S. cerevisiae)                                          |
| GO cytoplasm | 293 | 4355 | 0.989 | 26119 low density lipoprotein receptor adaptor protein 1                       |
| GO cytoplasm | 293 | 4355 | 0.989 | 26191 protein tyrosine phosphatase, non-receptor type 22 (lymphoid)            |

|              |     |      |       |                                                                            |
|--------------|-----|------|-------|----------------------------------------------------------------------------|
| GO cytoplasm | 293 | 4355 | 0.989 | 26270 F-box protein 6                                                      |
| GO cytoplasm | 293 | 4355 | 0.989 | 27035 NADPH oxidase 1                                                      |
| GO cytoplasm | 293 | 4355 | 0.989 | 27295 PDZ and LIM domain 3                                                 |
| GO cytoplasm | 293 | 4355 | 0.989 | 2737 GLI family zinc finger 3                                              |
| GO cytoplasm | 293 | 4355 | 0.989 | 2752 glutamate-ammonia ligase (glutamine synthetase)                       |
| GO cytoplasm | 293 | 4355 | 0.989 | 28951 tribbles homolog 2 (Drosophila)                                      |
| GO cytoplasm | 293 | 4355 | 0.989 | 28996 homeodomain interacting protein kinase 2                             |
| GO cytoplasm | 293 | 4355 | 0.989 | 29108 PYD and CARD domain containing                                       |
| GO cytoplasm | 293 | 4355 | 0.989 | 29116 myosin regulatory light chain interacting protein                    |
| GO cytoplasm | 293 | 4355 | 0.989 | 2947 glutathione S-transferase mu 3 (brain)                                |
| GO cytoplasm | 293 | 4355 | 0.989 | 29760 B-cell linker                                                        |
| GO cytoplasm | 293 | 4355 | 0.989 | 29943 peptidyl arginine deiminase, type I                                  |
| GO cytoplasm | 293 | 4355 | 0.989 | 3034 histidine ammonia-lyase                                               |
| GO cytoplasm | 293 | 4355 | 0.989 | 311 annexin A11                                                            |
| GO cytoplasm | 293 | 4355 | 0.989 | 3142 H2.0-like homeobox                                                    |
| GO cytoplasm | 293 | 4355 | 0.989 | 316 aldehyde oxidase 1                                                     |
| GO cytoplasm | 293 | 4355 | 0.989 | 3192 heterogeneous nuclear ribonucleoprotein U (scaffold attachment facto  |
| GO cytoplasm | 293 | 4355 | 0.989 | 3428 interferon, gamma-inducible protein 16                                |
| GO cytoplasm | 293 | 4355 | 0.989 | 345895 radial spoke head 4 homolog A (Chlamydomonas)                       |
| GO cytoplasm | 293 | 4355 | 0.989 | 358 aquaporin 1 (Colton blood group)                                       |
| GO cytoplasm | 293 | 4355 | 0.989 | 3587 interleukin 10 receptor, alpha                                        |
| GO cytoplasm | 293 | 4355 | 0.989 | 3665 interferon regulatory factor 7                                        |
| GO cytoplasm | 293 | 4355 | 0.989 | 3709 inositol 1,4,5-triphosphate receptor, type 2                          |
| GO cytoplasm | 293 | 4355 | 0.989 | 375449 microtubule associated serine/threonine kinase family member 4      |
| GO cytoplasm | 293 | 4355 | 0.989 | 3775 potassium channel, subfamily K, member 1                              |
| GO cytoplasm | 293 | 4355 | 0.989 | 3790 potassium voltage-gated channel, delayed-rectifier, subfamily S, memb |
| GO cytoplasm | 293 | 4355 | 0.989 | 3815 v-kit Hardy-Zuckerman 4 feline sarcoma viral oncogene homolog         |
| GO cytoplasm | 293 | 4355 | 0.989 | 388743 calpain 8                                                           |
| GO cytoplasm | 293 | 4355 | 0.989 | 389337 Rho guanine nucleotide exchange factor (GEF) 37                     |
| GO cytoplasm | 293 | 4355 | 0.989 | 395 Rho GTPase activating protein 6                                        |
| GO cytoplasm | 293 | 4355 | 0.989 | 3958 lectin, galactoside-binding, soluble, 3                               |
| GO cytoplasm | 293 | 4355 | 0.989 | 3983 actin binding LIM protein 1                                           |
| GO cytoplasm | 293 | 4355 | 0.989 | 3993 lethal giant larvae homolog 2 (Drosophila)                            |
| GO cytoplasm | 293 | 4355 | 0.989 | 4008 LIM domain 7                                                          |
| GO cytoplasm | 293 | 4355 | 0.989 | 4087 SMAD family member 2                                                  |
| GO cytoplasm | 293 | 4355 | 0.989 | 4163 mutated in colorectal cancers                                         |

|              |     |      |       |                                                                                |
|--------------|-----|------|-------|--------------------------------------------------------------------------------|
| GO cytoplasm | 293 | 4355 | 0.989 | 4170 myeloid cell leukemia sequence 1 (BCL2-related)                           |
| GO cytoplasm | 293 | 4355 | 0.989 | 4209 myocyte enhancer factor 2D                                                |
| GO cytoplasm | 293 | 4355 | 0.989 | 4212 Meis homeobox 2                                                           |
| GO cytoplasm | 293 | 4355 | 0.989 | 4223 mesenchyme homeobox 2                                                     |
| GO cytoplasm | 293 | 4355 | 0.989 | 4254 KIT ligand                                                                |
| GO cytoplasm | 293 | 4355 | 0.989 | 4306 nuclear receptor subfamily 3, group C, member 2                           |
| GO cytoplasm | 293 | 4355 | 0.989 | 4582 mucin 1, cell surface associated                                          |
| GO cytoplasm | 293 | 4355 | 0.989 | 4599 myxovirus (influenza virus) resistance 1, interferon-inducible protein p. |
| GO cytoplasm | 293 | 4355 | 0.989 | 4600 myxovirus (influenza virus) resistance 2 (mouse)                          |
| GO cytoplasm | 293 | 4355 | 0.989 | 4692 necdin homolog (mouse)                                                    |
| GO cytoplasm | 293 | 4355 | 0.989 | 4778 nuclear factor (erythroid-derived 2), 45kDa                               |
| GO cytoplasm | 293 | 4355 | 0.989 | 4791 nuclear factor of kappa light polypeptide gene enhancer in B-cells 2 (p4  |
| GO cytoplasm | 293 | 4355 | 0.989 | 4792 nuclear factor of kappa light polypeptide gene enhancer in B-cells inhib  |
| GO cytoplasm | 293 | 4355 | 0.989 | 4794 nuclear factor of kappa light polypeptide gene enhancer in B-cells inhib  |
| GO cytoplasm | 293 | 4355 | 0.989 | 48 aconitase 1, soluble                                                        |
| GO cytoplasm | 293 | 4355 | 0.989 | 4817 nitrilase 1                                                               |
| GO cytoplasm | 293 | 4355 | 0.989 | 4842 nitric oxide synthase 1 (neuronal)                                        |
| GO cytoplasm | 293 | 4355 | 0.989 | 4849 CCR4-NOT transcription complex, subunit 3                                 |
| GO cytoplasm | 293 | 4355 | 0.989 | 4851 Notch homolog 1, translocation-associated (Drosophila)                    |
| GO cytoplasm | 293 | 4355 | 0.989 | 4889 neuropeptide Y receptor Y5                                                |
| GO cytoplasm | 293 | 4355 | 0.989 | 4929 nuclear receptor subfamily 4, group A, member 2                           |
| GO cytoplasm | 293 | 4355 | 0.989 | 5071 Parkinson disease (autosomal recessive, juvenile) 2, parkin               |
| GO cytoplasm | 293 | 4355 | 0.989 | 50865 heme binding protein 1                                                   |
| GO cytoplasm | 293 | 4355 | 0.989 | 51085 MLX interacting protein-like                                             |
| GO cytoplasm | 293 | 4355 | 0.989 | 51168 myosin XVA                                                               |
| GO cytoplasm | 293 | 4355 | 0.989 | 51228 glycolipid transfer protein                                              |
| GO cytoplasm | 293 | 4355 | 0.989 | 51314 thioredoxin domain containing 3 (spermatozoa)                            |
| GO cytoplasm | 293 | 4355 | 0.989 | 5132 phosducin                                                                 |
| GO cytoplasm | 293 | 4355 | 0.989 | 5152 phosphodiesterase 9A                                                      |
| GO cytoplasm | 293 | 4355 | 0.989 | 51523 CXXC finger 5                                                            |
| GO cytoplasm | 293 | 4355 | 0.989 | 51655 RAS, dexamethasone-induced 1                                             |
| GO cytoplasm | 293 | 4355 | 0.989 | 51710 zinc finger protein 44                                                   |
| GO cytoplasm | 293 | 4355 | 0.989 | 51754 transmembrane protein 8B                                                 |
| GO cytoplasm | 293 | 4355 | 0.989 | 5187 period homolog 1 (Drosophila)                                             |
| GO cytoplasm | 293 | 4355 | 0.989 | 5218 cyclin-dependent kinase 14                                                |
| GO cytoplasm | 293 | 4355 | 0.989 | 5239 phosphoglucomutase 5                                                      |

|              |     |      |       |                                                                            |
|--------------|-----|------|-------|----------------------------------------------------------------------------|
| GO cytoplasm | 293 | 4355 | 0.989 | 5327 plasminogen activator, tissue                                         |
| GO cytoplasm | 293 | 4355 | 0.989 | 53347 ubiquitin associated and SH3 domain containing, A                    |
| GO cytoplasm | 293 | 4355 | 0.989 | 53405 chloride intracellular channel 5                                     |
| GO cytoplasm | 293 | 4355 | 0.989 | 5371 promyelocytic leukemia                                                |
| GO cytoplasm | 293 | 4355 | 0.989 | 5460 POU class 5 homeobox 1                                                |
| GO cytoplasm | 293 | 4355 | 0.989 | 54739 XIAP associated factor 1                                             |
| GO cytoplasm | 293 | 4355 | 0.989 | 54877 zinc finger, CCHC domain containing 2                                |
| GO cytoplasm | 293 | 4355 | 0.989 | 54961 slingshot homolog 3 (Drosophila)                                     |
| GO cytoplasm | 293 | 4355 | 0.989 | 55124 piwi-like 2 (Drosophila)                                             |
| GO cytoplasm | 293 | 4355 | 0.989 | 55140 elongation protein 3 homolog ( <i>S. cerevisiae</i> )                |
| GO cytoplasm | 293 | 4355 | 0.989 | 55160 Rho guanine nucleotide exchange factor (GEF) 10-like                 |
| GO cytoplasm | 293 | 4355 | 0.989 | 55200 pleckstrin homology domain containing, family G (with RhoGef domain  |
| GO cytoplasm | 293 | 4355 | 0.989 | 55249 YY1 associated protein 1                                             |
| GO cytoplasm | 293 | 4355 | 0.989 | 55616 ArfGAP with SH3 domain, ankyrin repeat and PH domain 3               |
| GO cytoplasm | 293 | 4355 | 0.989 | 55638 Golgi-localized protein                                              |
| GO cytoplasm | 293 | 4355 | 0.989 | 55705 importin 9                                                           |
| GO cytoplasm | 293 | 4355 | 0.989 | 55740 enabled homolog (Drosophila)                                         |
| GO cytoplasm | 293 | 4355 | 0.989 | 5577 protein kinase, cAMP-dependent, regulatory, type II, beta             |
| GO cytoplasm | 293 | 4355 | 0.989 | 55893 zinc finger protein 395                                              |
| GO cytoplasm | 293 | 4355 | 0.989 | 55909 bridging integrator 3                                                |
| GO cytoplasm | 293 | 4355 | 0.989 | 56271 brain expressed, X-linked 4                                          |
| GO cytoplasm | 293 | 4355 | 0.989 | 56288 par-3 partitioning defective 3 homolog ( <i>C. elegans</i> )         |
| GO cytoplasm | 293 | 4355 | 0.989 | 5696 proteasome (prosome, macropain) subunit, beta type, 8 (large multifur |
| GO cytoplasm | 293 | 4355 | 0.989 | 5698 proteasome (prosome, macropain) subunit, beta type, 9 (large multifur |
| GO cytoplasm | 293 | 4355 | 0.989 | 5699 proteasome (prosome, macropain) subunit, beta type, 10                |
| GO cytoplasm | 293 | 4355 | 0.989 | 57118 calcium/calmodulin-dependent protein kinase ID                       |
| GO cytoplasm | 293 | 4355 | 0.989 | 57132 chromatin modifying protein 1B                                       |
| GO cytoplasm | 293 | 4355 | 0.989 | 57147 SCY1-like 3 ( <i>S. cerevisiae</i> )                                 |
| GO cytoplasm | 293 | 4355 | 0.989 | 57186 Ral GTPase activating protein, alpha subunit 2 (catalytic)           |
| GO cytoplasm | 293 | 4355 | 0.989 | 57214 KIAA1199                                                             |
| GO cytoplasm | 293 | 4355 | 0.989 | 573 BCL2-associated athanogene                                             |
| GO cytoplasm | 293 | 4355 | 0.989 | 57379 activation-induced cytidine deaminase                                |
| GO cytoplasm | 293 | 4355 | 0.989 | 5742 prostaglandin-endoperoxide synthase 1 (prostaglandin G/H synthase a   |
| GO cytoplasm | 293 | 4355 | 0.989 | 57524 CASK interacting protein 1                                           |
| GO cytoplasm | 293 | 4355 | 0.989 | 57619 shroom family member 3                                               |
| GO cytoplasm | 293 | 4355 | 0.989 | 5774 protein tyrosine phosphatase, non-receptor type 3                     |



|              |     |      |       |                                                                                  |
|--------------|-----|------|-------|----------------------------------------------------------------------------------|
| GO cytoplasm | 293 | 4355 | 0.989 | 5791 protein tyrosine phosphatase, receptor type, E                              |
| GO cytoplasm | 293 | 4355 | 0.989 | 5794 protein tyrosine phosphatase, receptor type, H                              |
| GO cytoplasm | 293 | 4355 | 0.989 | 5801 protein tyrosine phosphatase, receptor type, R                              |
| GO cytoplasm | 293 | 4355 | 0.989 | 60485 salvador homolog 1 (Drosophila)                                            |
| GO cytoplasm | 293 | 4355 | 0.989 | 6239 ras responsive element binding protein 1                                    |
| GO cytoplasm | 293 | 4355 | 0.989 | 64083 golgi phosphoprotein 3 (coat-protein)                                      |
| GO cytoplasm | 293 | 4355 | 0.989 | 64108 receptor (chemosensory) transporter protein 4                              |
| GO cytoplasm | 293 | 4355 | 0.989 | 64127 nucleotide-binding oligomerization domain containing 2                     |
| GO cytoplasm | 293 | 4355 | 0.989 | 64135 interferon induced with helicase C domain 1                                |
| GO cytoplasm | 293 | 4355 | 0.989 | 642273 family with sequence similarity 110, member C                             |
| GO cytoplasm | 293 | 4355 | 0.989 | 64359 nucleoredoxin                                                              |
| GO cytoplasm | 293 | 4355 | 0.989 | 6446 serum/glucocorticoid regulated kinase 1                                     |
| GO cytoplasm | 293 | 4355 | 0.989 | 6494 signal-induced proliferation-associated 1                                   |
| GO cytoplasm | 293 | 4355 | 0.989 | 652 bone morphogenetic protein 4                                                 |
| GO cytoplasm | 293 | 4355 | 0.989 | 6622 synuclein, alpha (non A4 component of amyloid precursor)                    |
| GO cytoplasm | 293 | 4355 | 0.989 | 6706 small proline-rich protein 2G                                               |
| GO cytoplasm | 293 | 4355 | 0.989 | 6710 spectrin, beta, erythrocytic                                                |
| GO cytoplasm | 293 | 4355 | 0.989 | 6778 signal transducer and activator of transcription 6, interleukin-4 inducible |
| GO cytoplasm | 293 | 4355 | 0.989 | 6812 syntaxin binding protein 1                                                  |
| GO cytoplasm | 293 | 4355 | 0.989 | 6819 sulfotransferase family, cytosolic, 1C, member 2                            |
| GO cytoplasm | 293 | 4355 | 0.989 | 6850 spleen tyrosine kinase                                                      |
| GO cytoplasm | 293 | 4355 | 0.989 | 6857 synaptotagmin I                                                             |
| GO cytoplasm | 293 | 4355 | 0.989 | 7001 peroxiredoxin 2                                                             |
| GO cytoplasm | 293 | 4355 | 0.989 | 7097 toll-like receptor 2                                                        |
| GO cytoplasm | 293 | 4355 | 0.989 | 7098 toll-like receptor 3                                                        |
| GO cytoplasm | 293 | 4355 | 0.989 | 7099 toll-like receptor 4                                                        |
| GO cytoplasm | 293 | 4355 | 0.989 | 7111 tropomodulin 1                                                              |
| GO cytoplasm | 293 | 4355 | 0.989 | 7170 tropomyosin 3                                                               |
| GO cytoplasm | 293 | 4355 | 0.989 | 7474 wingless-type MMTV integration site family, member 5A                       |
| GO cytoplasm | 293 | 4355 | 0.989 | 7538 zinc finger protein 36, C3H type, homolog (mouse)                           |
| GO cytoplasm | 293 | 4355 | 0.989 | 7597 zinc finger and BTB domain containing 25                                    |
| GO cytoplasm | 293 | 4355 | 0.989 | 760 carbonic anhydrase II                                                        |
| GO cytoplasm | 293 | 4355 | 0.989 | 7706 tripartite motif-containing 25                                              |
| GO cytoplasm | 293 | 4355 | 0.989 | 7852 chemokine (C-X-C motif) receptor 4                                          |
| GO cytoplasm | 293 | 4355 | 0.989 | 79092 caspase recruitment domain family, member 14                               |
| GO cytoplasm | 293 | 4355 | 0.989 | 79098 chromosome 1 open reading frame 116                                        |

|              |     |      |       |                                                                              |
|--------------|-----|------|-------|------------------------------------------------------------------------------|
| GO cytoplasm | 293 | 4355 | 0.989 | 79132 DEXH (Asp-Glu-X-His) box polypeptide 58                                |
| GO cytoplasm | 293 | 4355 | 0.989 | 79444 baculoviral IAP repeat-containing 7                                    |
| GO cytoplasm | 293 | 4355 | 0.989 | 79661 nei endonuclease VIII-like 1 (E. coli)                                 |
| GO cytoplasm | 293 | 4355 | 0.989 | 79789 calmin (calponin-like, transmembrane)                                  |
| GO cytoplasm | 293 | 4355 | 0.989 | 79816 transducin-like enhancer of split 6 (E(sp1) homolog, Drosophila)       |
| GO cytoplasm | 293 | 4355 | 0.989 | 79987 sushi, von Willebrand factor type A, EGF and pentraxin domain contain  |
| GO cytoplasm | 293 | 4355 | 0.989 | 80830 apolipoprotein L, 6                                                    |
| GO cytoplasm | 293 | 4355 | 0.989 | 80833 apolipoprotein L, 3                                                    |
| GO cytoplasm | 293 | 4355 | 0.989 | 81544 glycerophosphodiester phosphodiesterase domain containing 5            |
| GO cytoplasm | 293 | 4355 | 0.989 | 8313 axin 2                                                                  |
| GO cytoplasm | 293 | 4355 | 0.989 | 834 caspase 1, apoptosis-related cysteine peptidase (interleukin 1, beta, co |
| GO cytoplasm | 293 | 4355 | 0.989 | 83593 Ras association (RalGDS/AF-6) domain family member 5                   |
| GO cytoplasm | 293 | 4355 | 0.989 | 83595 SRY (sex determining region Y)-box 7                                   |
| GO cytoplasm | 293 | 4355 | 0.989 | 83666 poly (ADP-ribose) polymerase family, member 9                          |
| GO cytoplasm | 293 | 4355 | 0.989 | 84033 obscurin, cytoskeletal calmodulin and titin-interacting RhoGEF         |
| GO cytoplasm | 293 | 4355 | 0.989 | 84059 G protein-coupled receptor 98                                          |
| GO cytoplasm | 293 | 4355 | 0.989 | 8418 cytidine monophosphate-N-acetylneuraminic acid hydroxylase (CMP-N       |
| GO cytoplasm | 293 | 4355 | 0.989 | 84875 poly (ADP-ribose) polymerase family, member 10                         |
| GO cytoplasm | 293 | 4355 | 0.989 | 84941 hematopoietic SH2 domain containing                                    |
| GO cytoplasm | 293 | 4355 | 0.989 | 85004 RAS-like, estrogen-regulated, growth inhibitor                         |
| GO cytoplasm | 293 | 4355 | 0.989 | 8514 potassium voltage-gated channel, shaker-related subfamily, beta mem     |
| GO cytoplasm | 293 | 4355 | 0.989 | 8527 diacylglycerol kinase, delta 130kDa                                     |
| GO cytoplasm | 293 | 4355 | 0.989 | 8531 cold shock domain protein A                                             |
| GO cytoplasm | 293 | 4355 | 0.989 | 85477 scinderin                                                              |
| GO cytoplasm | 293 | 4355 | 0.989 | 8556 CDC14 cell division cycle 14 homolog A (S. cerevisiae)                  |
| GO cytoplasm | 293 | 4355 | 0.989 | 8600 tumor necrosis factor (ligand) superfamily, member 11                   |
| GO cytoplasm | 293 | 4355 | 0.989 | 8631 src kinase associated phosphoprotein 1                                  |
| GO cytoplasm | 293 | 4355 | 0.989 | 8653 DEAD (Asp-Glu-Ala-Asp) box polypeptide 3, Y-linked                      |
| GO cytoplasm | 293 | 4355 | 0.989 | 8660 insulin receptor substrate 2                                            |
| GO cytoplasm | 293 | 4355 | 0.989 | 8740 tumor necrosis factor (ligand) superfamily, member 14                   |
| GO cytoplasm | 293 | 4355 | 0.989 | 8796 sciellin                                                                |
| GO cytoplasm | 293 | 4355 | 0.989 | 8839 WNT1 inducible signaling pathway protein 2                              |
| GO cytoplasm | 293 | 4355 | 0.989 | 8848 TSC22 domain family, member 1                                           |
| GO cytoplasm | 293 | 4355 | 0.989 | 8863 period homolog 3 (Drosophila)                                           |
| GO cytoplasm | 293 | 4355 | 0.989 | 8864 period homolog 2 (Drosophila)                                           |
| GO cytoplasm | 293 | 4355 | 0.989 | 8912 calcium channel, voltage-dependent, T type, alpha 1H subunit            |

|                       |     |      |       |                                                                             |
|-----------------------|-----|------|-------|-----------------------------------------------------------------------------|
| GO cytoplasm          | 293 | 4355 | 0.989 | 89778 serpin peptidase inhibitor, clade B (ovalbumin), member 11 (gene/pse) |
| GO cytoplasm          | 293 | 4355 | 0.989 | 8996 nucleolar protein 3 (apoptosis repressor with CARD domain)             |
| GO cytoplasm          | 293 | 4355 | 0.989 | 9021 suppressor of cytokine signaling 3                                     |
| GO cytoplasm          | 293 | 4355 | 0.989 | 90362 family with sequence similarity 110, member B                         |
| GO cytoplasm          | 293 | 4355 | 0.989 | 9050 proline-serine-threonine phosphatase interacting protein 2             |
| GO cytoplasm          | 293 | 4355 | 0.989 | 9087 thymosin beta 4, Y-linked                                              |
| GO cytoplasm          | 293 | 4355 | 0.989 | 9185 RALBP1 associated Eps domain containing 2                              |
| GO cytoplasm          | 293 | 4355 | 0.989 | 9271 piwi-like 1 (Drosophila)                                               |
| GO cytoplasm          | 293 | 4355 | 0.989 | 93100 nicotinate phosphoribosyltransferase domain containing 1              |
| GO cytoplasm          | 293 | 4355 | 0.989 | 9414 tight junction protein 2 (zona occludens 2)                            |
| GO cytoplasm          | 293 | 4355 | 0.989 | 9592 immediate early response 2                                             |
| GO cytoplasm          | 293 | 4355 | 0.989 | 9595 cytohesin 1 interacting protein                                        |
| GO cytoplasm          | 293 | 4355 | 0.989 | 9633 metallothionein-like 5, testis-specific (tesmin)                       |
| GO cytoplasm          | 293 | 4355 | 0.989 | 9734 histone deacetylase 9                                                  |
| GO cytoplasm          | 293 | 4355 | 0.989 | 9764 KIAA0513                                                               |
| GO cytoplasm          | 293 | 4355 | 0.989 | 9788 metastasis suppressor 1                                                |
| GO cytoplasm          | 293 | 4355 | 0.989 | 9904 RNA binding motif protein 19                                           |
| GO cytoplasm          | 293 | 4355 | 0.989 | 9935 v-maf musculoaponeurotic fibrosarcoma oncogene homolog B (avian)       |
| GO cytoplasm          | 293 | 4355 | 0.989 | 9962 solute carrier family 23 (nucleobase transporters), member 2           |
| GO hydrolase activity | 61  | 917  | 0.989 | 10014 histone deacetylase 5                                                 |
| GO hydrolase activity | 61  | 917  | 0.989 | 10076 protein tyrosine phosphatase, receptor type, U                        |
| GO hydrolase activity | 61  | 917  | 0.989 | 10106 CTD (carboxy-terminal domain, RNA polymerase II, polypeptide A) sma   |
| GO hydrolase activity | 61  | 917  | 0.989 | 104 adenosine deaminase, RNA-specific, B1 (RED1 homolog rat)                |
| GO hydrolase activity | 61  | 917  | 0.989 | 1080 cystic fibrosis transmembrane conductance regulator (ATP-binding cas:  |
| GO hydrolase activity | 61  | 917  | 0.989 | 11156 protein tyrosine phosphatase type IVA, member 3                       |
| GO hydrolase activity | 61  | 917  | 0.989 | 1117 chitinase 3-like 2                                                     |
| GO hydrolase activity | 61  | 917  | 0.989 | 11343 monoglyceride lipase                                                  |
| GO hydrolase activity | 61  | 917  | 0.989 | 130367 sphingosine-1-phosphate phosphotase 2                                |
| GO hydrolase activity | 61  | 917  | 0.989 | 148229 ATPase, class I, type 8B, member 3                                   |
| GO hydrolase activity | 61  | 917  | 0.989 | 1785 dynamin 2                                                              |
| GO hydrolase activity | 61  | 917  | 0.989 | 1843 dual specificity phosphatase 1                                         |
| GO hydrolase activity | 61  | 917  | 0.989 | 1844 dual specificity phosphatase 2                                         |
| GO hydrolase activity | 61  | 917  | 0.989 | 1847 dual specificity phosphatase 5                                         |
| GO hydrolase activity | 61  | 917  | 0.989 | 22901 arylsulfatase G                                                       |
| GO hydrolase activity | 61  | 917  | 0.989 | 23035 PH domain and leucine rich repeat protein phosphatase 2               |
| GO hydrolase activity | 61  | 917  | 0.989 | 23371 tensin like C1 domain containing phosphatase (tensin 2)               |

|                       |    |     |       |                                                                               |
|-----------------------|----|-----|-------|-------------------------------------------------------------------------------|
| GO hydrolase activity | 61 | 917 | 0.989 | 23382 adenosylhomocysteinase-like 2                                           |
| GO hydrolase activity | 61 | 917 | 0.989 | 26191 protein tyrosine phosphatase, non-receptor type 22 (lymphoid)           |
| GO hydrolase activity | 61 | 917 | 0.989 | 271 adenosine monophosphate deaminase 2                                       |
| GO hydrolase activity | 61 | 917 | 0.989 | 27165 glutaminase 2 (liver, mitochondrial)                                    |
| GO hydrolase activity | 61 | 917 | 0.989 | 29943 peptidyl arginine deiminase, type I                                     |
| GO hydrolase activity | 61 | 917 | 0.989 | 340654 lipase, family member M                                                |
| GO hydrolase activity | 61 | 917 | 0.989 | 412 steroid sulfatase (microsomal), isozyme S                                 |
| GO hydrolase activity | 61 | 917 | 0.989 | 493 ATPase, Ca <sup>++</sup> transporting, plasma membrane 4                  |
| GO hydrolase activity | 61 | 917 | 0.989 | 5136 phosphodiesterase 1A, calmodulin-dependent                               |
| GO hydrolase activity | 61 | 917 | 0.989 | 5152 phosphodiesterase 9A                                                     |
| GO hydrolase activity | 61 | 917 | 0.989 | 5158 phosphodiesterase 6B, cGMP-specific, rod, beta                           |
| GO hydrolase activity | 61 | 917 | 0.989 | 5243 ATP-binding cassette, sub-family B (MDR/TAP), member 1                   |
| GO hydrolase activity | 61 | 917 | 0.989 | 5244 ATP-binding cassette, sub-family B (MDR/TAP), member 4                   |
| GO hydrolase activity | 61 | 917 | 0.989 | 54932 exonuclease 3'-5' domain containing 3                                   |
| GO hydrolase activity | 61 | 917 | 0.989 | 54961 slingshot homolog 3 (Drosophila)                                        |
| GO hydrolase activity | 61 | 917 | 0.989 | 55601 DEAD (Asp-Glu-Ala-Asp) box polypeptide 60                               |
| GO hydrolase activity | 61 | 917 | 0.989 | 56261 glycerophosphocholine phosphodiesterase GDE1 homolog (S. cerevisia      |
| GO hydrolase activity | 61 | 917 | 0.989 | 57104 patatin-like phospholipase domain containing 2                          |
| GO hydrolase activity | 61 | 917 | 0.989 | 57379 activation-induced cytidine deaminase                                   |
| GO hydrolase activity | 61 | 917 | 0.989 | 5774 protein tyrosine phosphatase, non-receptor type 3                        |
| GO hydrolase activity | 61 | 917 | 0.989 | 5787 protein tyrosine phosphatase, receptor type, B                           |
| GO hydrolase activity | 61 | 917 | 0.989 | 5789 protein tyrosine phosphatase, receptor type, D                           |
| GO hydrolase activity | 61 | 917 | 0.989 | 5791 protein tyrosine phosphatase, receptor type, E                           |
| GO hydrolase activity | 61 | 917 | 0.989 | 5794 protein tyrosine phosphatase, receptor type, H                           |
| GO hydrolase activity | 61 | 917 | 0.989 | 5799 protein tyrosine phosphatase, receptor type, N polypeptide 2             |
| GO hydrolase activity | 61 | 917 | 0.989 | 5801 protein tyrosine phosphatase, receptor type, R                           |
| GO hydrolase activity | 61 | 917 | 0.989 | 58489 family with sequence similarity 108, member C1                          |
| GO hydrolase activity | 61 | 917 | 0.989 | 64135 interferon induced with helicase C domain 1                             |
| GO hydrolase activity | 61 | 917 | 0.989 | 79132 DEXH (Asp-Glu-X-His) box polypeptide 58                                 |
| GO hydrolase activity | 61 | 917 | 0.989 | 7941 phospholipase A2, group VII (platelet-activating factor acetylhydrolase, |
| GO hydrolase activity | 61 | 917 | 0.989 | 79887 phospholipase B domain containing 1                                     |
| GO hydrolase activity | 61 | 917 | 0.989 | 79895 ATPase, class I, type 8B, member 4                                      |
| GO hydrolase activity | 61 | 917 | 0.989 | 81544 glycerophosphodiester phosphodiesterase domain containing 5             |
| GO hydrolase activity | 61 | 917 | 0.989 | 8509 N-deacetylase/N-sulfotransferase (heparan glucosaminyl) 2                |
| GO hydrolase activity | 61 | 917 | 0.989 | 85441 peroxisomal proliferator-activated receptor A interacting complex 285   |
| GO hydrolase activity | 61 | 917 | 0.989 | 8556 CDC14 cell division cycle 14 homolog A (S. cerevisiae)                   |

|                       |     |      |       |                                                                             |
|-----------------------|-----|------|-------|-----------------------------------------------------------------------------|
| GO hydrolase activity | 61  | 917  | 0.989 | 8622 phosphodiesterase 8B                                                   |
| GO hydrolase activity | 61  | 917  | 0.989 | 8635 ribonuclease T2                                                        |
| GO hydrolase activity | 61  | 917  | 0.989 | 8653 DEAD (Asp-Glu-Ala-Asp) box polypeptide 3, Y-linked                     |
| GO hydrolase activity | 61  | 917  | 0.989 | 8992 ATPase, H <sup>+</sup> transporting, lysosomal 9kDa, V0 subunit e1     |
| GO hydrolase activity | 61  | 917  | 0.989 | 9563 hexose-6-phosphate dehydrogenase (glucose 1-dehydrogenase)             |
| GO hydrolase activity | 61  | 917  | 0.989 | 9615 guanine deaminase                                                      |
| GO hydrolase activity | 61  | 917  | 0.989 | 9734 histone deacetylase 9                                                  |
| GO hydrolase activity | 61  | 917  | 0.989 | 9914 ATPase, Ca <sup>++</sup> transporting, type 2C, member 2               |
| GO nucleus            | 305 | 4735 | 0.989 | 10014 histone deacetylase 5                                                 |
| GO nucleus            | 305 | 4735 | 0.989 | 10081 programmed cell death 7                                               |
| GO nucleus            | 305 | 4735 | 0.989 | 10106 CTD (carboxy-terminal domain, RNA polymerase II, polypeptide A) sma   |
| GO nucleus            | 305 | 4735 | 0.989 | 10221 tribbles homolog 1 (Drosophila)                                       |
| GO nucleus            | 305 | 4735 | 0.989 | 10346 tripartite motif-containing 22                                        |
| GO nucleus            | 305 | 4735 | 0.989 | 10397 N-myc downstream regulated 1                                          |
| GO nucleus            | 305 | 4735 | 0.989 | 104 adenosine deaminase, RNA-specific, B1 (RED1 homolog rat)                |
| GO nucleus            | 305 | 4735 | 0.989 | 10481 homeobox B13                                                          |
| GO nucleus            | 305 | 4735 | 0.989 | 10628 thioredoxin interacting protein                                       |
| GO nucleus            | 305 | 4735 | 0.989 | 10766 transducer of ERBB2, 2                                                |
| GO nucleus            | 305 | 4735 | 0.989 | 10838 zinc finger protein 275                                               |
| GO nucleus            | 305 | 4735 | 0.989 | 10891 peroxisome proliferator-activated receptor gamma, coactivator 1 alpha |
| GO nucleus            | 305 | 4735 | 0.989 | 10957 proline-rich nuclear receptor coactivator 1                           |
| GO nucleus            | 305 | 4735 | 0.989 | 11030 RNA binding protein with multiple splicing                            |
| GO nucleus            | 305 | 4735 | 0.989 | 11078 TRIO and F-actin binding protein                                      |
| GO nucleus            | 305 | 4735 | 0.989 | 11187 plakophilin 3                                                         |
| GO nucleus            | 305 | 4735 | 0.989 | 11200 CHK2 checkpoint homolog (S. pombe)                                    |
| GO nucleus            | 305 | 4735 | 0.989 | 11213 interleukin-1 receptor-associated kinase 3                            |
| GO nucleus            | 305 | 4735 | 0.989 | 11279 Kruppel-like factor 8                                                 |
| GO nucleus            | 305 | 4735 | 0.989 | 115196 zinc finger protein 554                                              |
| GO nucleus            | 305 | 4735 | 0.989 | 116071 basic leucine zipper transcription factor, ATF-like 2                |
| GO nucleus            | 305 | 4735 | 0.989 | 116113 forkhead box P4                                                      |
| GO nucleus            | 305 | 4735 | 0.989 | 116844 leucine-rich alpha-2-glycoprotein 1                                  |
| GO nucleus            | 305 | 4735 | 0.989 | 1193 chloride intracellular channel 2                                       |
| GO nucleus            | 305 | 4735 | 0.989 | 123 perilipin 2                                                             |
| GO nucleus            | 305 | 4735 | 0.989 | 123036 tandem C2 domains, nuclear                                           |
| GO nucleus            | 305 | 4735 | 0.989 | 127343 diencephalon/mesencephalon homeobox 1                                |
| GO nucleus            | 305 | 4735 | 0.989 | 127933 U2AF homology motif (UHM) kinase 1                                   |

|            |     |      |       |                                                                                |
|------------|-----|------|-------|--------------------------------------------------------------------------------|
| GO nucleus | 305 | 4735 | 0.989 | 135112 nuclear receptor coactivator 7                                          |
| GO nucleus | 305 | 4735 | 0.989 | 1382 cellular retinoic acid binding protein 2                                  |
| GO nucleus | 305 | 4735 | 0.989 | 140901 serine/threonine kinase 35                                              |
| GO nucleus | 305 | 4735 | 0.989 | 143689 piwi-like 4 (Drosophila)                                                |
| GO nucleus | 305 | 4735 | 0.989 | 147694 zinc finger protein 548                                                 |
| GO nucleus | 305 | 4735 | 0.989 | 147923 zinc finger protein 420                                                 |
| GO nucleus | 305 | 4735 | 0.989 | 148398 sterile alpha motif domain containing 11                                |
| GO nucleus | 305 | 4735 | 0.989 | 150094 salt-inducible kinase 1                                                 |
| GO nucleus | 305 | 4735 | 0.989 | 151636 deltex 3-like (Drosophila)                                              |
| GO nucleus | 305 | 4735 | 0.989 | 154 adrenergic, beta-2-, receptor, surface                                     |
| GO nucleus | 305 | 4735 | 0.989 | 157506 retinol dehydrogenase 10 (all-trans)                                    |
| GO nucleus | 305 | 4735 | 0.989 | 158800 RhoX homeobox family, member 1                                          |
| GO nucleus | 305 | 4735 | 0.989 | 1628 D site of albumin promoter (albumin D-box) binding protein                |
| GO nucleus | 305 | 4735 | 0.989 | 162962 zinc finger protein 836                                                 |
| GO nucleus | 305 | 4735 | 0.989 | 163050 zinc finger protein 564                                                 |
| GO nucleus | 305 | 4735 | 0.989 | 163115 zinc finger protein 781                                                 |
| GO nucleus | 305 | 4735 | 0.989 | 171483 family with sequence similarity 9, member B                             |
| GO nucleus | 305 | 4735 | 0.989 | 1820 AT rich interactive domain 3A (BRIGHT-like)                               |
| GO nucleus | 305 | 4735 | 0.989 | 1822 atrophin 1                                                                |
| GO nucleus | 305 | 4735 | 0.989 | 1843 dual specificity phosphatase 1                                            |
| GO nucleus | 305 | 4735 | 0.989 | 1844 dual specificity phosphatase 2                                            |
| GO nucleus | 305 | 4735 | 0.989 | 1847 dual specificity phosphatase 5                                            |
| GO nucleus | 305 | 4735 | 0.989 | 1958 early growth response 1                                                   |
| GO nucleus | 305 | 4735 | 0.989 | 1959 early growth response 2                                                   |
| GO nucleus | 305 | 4735 | 0.989 | 1960 early growth response 3                                                   |
| GO nucleus | 305 | 4735 | 0.989 | 1999 E74-like factor 3 (ets domain transcription factor, epithelial-specific ) |
| GO nucleus | 305 | 4735 | 0.989 | 2033 E1A binding protein p300                                                  |
| GO nucleus | 305 | 4735 | 0.989 | 2066 v-erb-a erythroblastic leukemia viral oncogene homolog 4 (avian)          |
| GO nucleus | 305 | 4735 | 0.989 | 2114 v-ets erythroblastosis virus E26 oncogene homolog 2 (avian)               |
| GO nucleus | 305 | 4735 | 0.989 | 2115 ets variant 1                                                             |
| GO nucleus | 305 | 4735 | 0.989 | 2117 ets variant 3                                                             |
| GO nucleus | 305 | 4735 | 0.989 | 2122 MDS1 and EVI1 complex locus                                               |
| GO nucleus | 305 | 4735 | 0.989 | 219539 yippee-like 4 (Drosophila)                                              |
| GO nucleus | 305 | 4735 | 0.989 | 220359 tigger transposable element derived 3                                   |
| GO nucleus | 305 | 4735 | 0.989 | 222546 regulatory factor X, 6                                                  |
| GO nucleus | 305 | 4735 | 0.989 | 2263 fibroblast growth factor receptor 2                                       |

|            |     |      |       |                                                                             |
|------------|-----|------|-------|-----------------------------------------------------------------------------|
| GO nucleus | 305 | 4735 | 0.989 | 22807 IKAROS family zinc finger 2 (Helios)                                  |
| GO nucleus | 305 | 4735 | 0.989 | 2290 forkhead box G1                                                        |
| GO nucleus | 305 | 4735 | 0.989 | 22906 trafficking protein, kinesin binding 1                                |
| GO nucleus | 305 | 4735 | 0.989 | 2296 forkhead box C1                                                        |
| GO nucleus | 305 | 4735 | 0.989 | 2303 forkhead box C2 (MFH-1, mesenchyme forkhead 1)                         |
| GO nucleus | 305 | 4735 | 0.989 | 23035 PH domain and leucine rich repeat protein phosphatase 2               |
| GO nucleus | 305 | 4735 | 0.989 | 23043 TRAF2 and NCK interacting kinase                                      |
| GO nucleus | 305 | 4735 | 0.989 | 2306 forkhead box D2                                                        |
| GO nucleus | 305 | 4735 | 0.989 | 23081 lysine (K)-specific demethylase 4C                                    |
| GO nucleus | 305 | 4735 | 0.989 | 23099 zinc finger and BTB domain containing 43                              |
| GO nucleus | 305 | 4735 | 0.989 | 23119 hypermethylated in cancer 2                                           |
| GO nucleus | 305 | 4735 | 0.989 | 23368 protein phosphatase 1, regulatory (inhibitor) subunit 13B             |
| GO nucleus | 305 | 4735 | 0.989 | 23373 CREB regulated transcription coactivator 1                            |
| GO nucleus | 305 | 4735 | 0.989 | 23476 bromodomain containing 4                                              |
| GO nucleus | 305 | 4735 | 0.989 | 23492 chromobox homolog 7                                                   |
| GO nucleus | 305 | 4735 | 0.989 | 2353 FBJ murine osteosarcoma viral oncogene homolog                         |
| GO nucleus | 305 | 4735 | 0.989 | 2354 FBJ murine osteosarcoma viral oncogene homolog B                       |
| GO nucleus | 305 | 4735 | 0.989 | 23648 single stranded DNA binding protein 3                                 |
| GO nucleus | 305 | 4735 | 0.989 | 23774 bromodomain containing 1                                              |
| GO nucleus | 305 | 4735 | 0.989 | 240 arachidonate 5-lipoxygenase                                             |
| GO nucleus | 305 | 4735 | 0.989 | 2521 fused in sarcoma                                                       |
| GO nucleus | 305 | 4735 | 0.989 | 256051 zinc finger protein 549                                              |
| GO nucleus | 305 | 4735 | 0.989 | 25946 zinc finger protein 385A                                              |
| GO nucleus | 305 | 4735 | 0.989 | 2624 GATA binding protein 2                                                 |
| GO nucleus | 305 | 4735 | 0.989 | 26240 family with sequence similarity 50, member B                          |
| GO nucleus | 305 | 4735 | 0.989 | 26468 LIM homeobox 6                                                        |
| GO nucleus | 305 | 4735 | 0.989 | 27090 ST6 (alpha-N-acetyl-neuraminy-2,3-beta-galactosyl-1,3)-N-acetylgalact |
| GO nucleus | 305 | 4735 | 0.989 | 27295 PDZ and LIM domain 3                                                  |
| GO nucleus | 305 | 4735 | 0.989 | 2737 GLI family zinc finger 3                                               |
| GO nucleus | 305 | 4735 | 0.989 | 27434 polymerase (DNA directed), mu                                         |
| GO nucleus | 305 | 4735 | 0.989 | 284346 zinc finger protein 575                                              |
| GO nucleus | 305 | 4735 | 0.989 | 28959 transmembrane protein 176B                                            |
| GO nucleus | 305 | 4735 | 0.989 | 28996 homeodomain interacting protein kinase 2                              |
| GO nucleus | 305 | 4735 | 0.989 | 2911 glutamate receptor, metabotropic 1                                     |
| GO nucleus | 305 | 4735 | 0.989 | 29123 ankyrin repeat domain 11                                              |
| GO nucleus | 305 | 4735 | 0.989 | 311 annexin A11                                                             |

|            |     |      |       |                                                                             |
|------------|-----|------|-------|-----------------------------------------------------------------------------|
| GO nucleus | 305 | 4735 | 0.989 | 3131 hepatic leukemia factor                                                |
| GO nucleus | 305 | 4735 | 0.989 | 3142 H2.0-like homeobox                                                     |
| GO nucleus | 305 | 4735 | 0.989 | 3164 nuclear receptor subfamily 4, group A, member 1                        |
| GO nucleus | 305 | 4735 | 0.989 | 3169 forkhead box A1                                                        |
| GO nucleus | 305 | 4735 | 0.989 | 3175 one cut homeobox 1                                                     |
| GO nucleus | 305 | 4735 | 0.989 | 3192 heterogeneous nuclear ribonucleoprotein U (scaffold attachment facto   |
| GO nucleus | 305 | 4735 | 0.989 | 3400 inhibitor of DNA binding 4, dominant negative helix-loop-helix protein |
| GO nucleus | 305 | 4735 | 0.989 | 3428 interferon, gamma-inducible protein 16                                 |
| GO nucleus | 305 | 4735 | 0.989 | 342908 zinc finger protein 404                                              |
| GO nucleus | 305 | 4735 | 0.989 | 345462 zinc finger protein 879                                              |
| GO nucleus | 305 | 4735 | 0.989 | 3486 insulin-like growth factor binding protein 3                           |
| GO nucleus | 305 | 4735 | 0.989 | 358 aquaporin 1 (Colton blood group)                                        |
| GO nucleus | 305 | 4735 | 0.989 | 3601 interleukin 15 receptor, alpha                                         |
| GO nucleus | 305 | 4735 | 0.989 | 3643 insulin receptor                                                       |
| GO nucleus | 305 | 4735 | 0.989 | 3659 interferon regulatory factor 1                                         |
| GO nucleus | 305 | 4735 | 0.989 | 3665 interferon regulatory factor 7                                         |
| GO nucleus | 305 | 4735 | 0.989 | 3725 jun oncogene                                                           |
| GO nucleus | 305 | 4735 | 0.989 | 3726 jun B proto-oncogene                                                   |
| GO nucleus | 305 | 4735 | 0.989 | 379 ADP-ribosylation factor-like 4D                                         |
| GO nucleus | 305 | 4735 | 0.989 | 387496 RAS-like, family 11, member A                                        |
| GO nucleus | 305 | 4735 | 0.989 | 388536 zinc finger protein 790                                              |
| GO nucleus | 305 | 4735 | 0.989 | 388558 zinc finger protein 808                                              |
| GO nucleus | 305 | 4735 | 0.989 | 388567 zinc finger protein 749                                              |
| GO nucleus | 305 | 4735 | 0.989 | 389058 Sp5 transcription factor                                             |
| GO nucleus | 305 | 4735 | 0.989 | 3958 lectin, galactoside-binding, soluble, 3                                |
| GO nucleus | 305 | 4735 | 0.989 | 3959 lectin, galactoside-binding, soluble, 3 binding protein                |
| GO nucleus | 305 | 4735 | 0.989 | 4005 LIM domain only 2 (rhombotin-like 1)                                   |
| GO nucleus | 305 | 4735 | 0.989 | 4008 LIM domain 7                                                           |
| GO nucleus | 305 | 4735 | 0.989 | 4015 lysyl oxidase                                                          |
| GO nucleus | 305 | 4735 | 0.989 | 4056 leukotriene C4 synthase                                                |
| GO nucleus | 305 | 4735 | 0.989 | 4087 SMAD family member 2                                                   |
| GO nucleus | 305 | 4735 | 0.989 | 4163 mutated in colorectal cancers                                          |
| GO nucleus | 305 | 4735 | 0.989 | 4170 myeloid cell leukemia sequence 1 (BCL2-related)                        |
| GO nucleus | 305 | 4735 | 0.989 | 4194 Mdm4 p53 binding protein homolog (mouse)                               |
| GO nucleus | 305 | 4735 | 0.989 | 4204 methyl CpG binding protein 2 (Rett syndrome)                           |
| GO nucleus | 305 | 4735 | 0.989 | 4209 myocyte enhancer factor 2D                                             |



|            |     |      |       |                                                                               |
|------------|-----|------|-------|-------------------------------------------------------------------------------|
| GO nucleus | 305 | 4735 | 0.989 | 4212 Meis homeobox 2                                                          |
| GO nucleus | 305 | 4735 | 0.989 | 4223 mesenchyme homeobox 2                                                    |
| GO nucleus | 305 | 4735 | 0.989 | 4286 microphthalmia-associated transcription factor                           |
| GO nucleus | 305 | 4735 | 0.989 | 429 achaete-scute complex homolog 1 (Drosophila)                              |
| GO nucleus | 305 | 4735 | 0.989 | 4306 nuclear receptor subfamily 3, group C, member 2                          |
| GO nucleus | 305 | 4735 | 0.989 | 440603 BCL2-like 15                                                           |
| GO nucleus | 305 | 4735 | 0.989 | 4582 mucin 1, cell surface associated                                         |
| GO nucleus | 305 | 4735 | 0.989 | 4600 myxovirus (influenza virus) resistance 2 (mouse)                         |
| GO nucleus | 305 | 4735 | 0.989 | 4613 v-myc myelocytomatosis viral related oncogene, neuroblastoma derive      |
| GO nucleus | 305 | 4735 | 0.989 | 467 activating transcription factor 3                                         |
| GO nucleus | 305 | 4735 | 0.989 | 4692 necdin homolog (mouse)                                                   |
| GO nucleus | 305 | 4735 | 0.989 | 4778 nuclear factor (erythroid-derived 2), 45kDa                              |
| GO nucleus | 305 | 4735 | 0.989 | 4783 nuclear factor, interleukin 3 regulated                                  |
| GO nucleus | 305 | 4735 | 0.989 | 4784 nuclear factor I/X (CCAAT-binding transcription factor)                  |
| GO nucleus | 305 | 4735 | 0.989 | 4791 nuclear factor of kappa light polypeptide gene enhancer in B-cells 2 (p4 |
| GO nucleus | 305 | 4735 | 0.989 | 4792 nuclear factor of kappa light polypeptide gene enhancer in B-cells inhib |
| GO nucleus | 305 | 4735 | 0.989 | 4794 nuclear factor of kappa light polypeptide gene enhancer in B-cells inhib |
| GO nucleus | 305 | 4735 | 0.989 | 4802 nuclear transcription factor Y, gamma                                    |
| GO nucleus | 305 | 4735 | 0.989 | 4849 CCR4-NOT transcription complex, subunit 3                                |
| GO nucleus | 305 | 4735 | 0.989 | 4851 Notch homolog 1, translocation-associated (Drosophila)                   |
| GO nucleus | 305 | 4735 | 0.989 | 4853 Notch homolog 2 (Drosophila)                                             |
| GO nucleus | 305 | 4735 | 0.989 | 4929 nuclear receptor subfamily 4, group A, member 2                          |
| GO nucleus | 305 | 4735 | 0.989 | 4939 2'-5'-oligoadenylate synthetase 2, 69/71kDa                              |
| GO nucleus | 305 | 4735 | 0.989 | 5071 Parkinson disease (autosomal recessive, juvenile) 2, parkin              |
| GO nucleus | 305 | 4735 | 0.989 | 50809 heterochromatin protein 1, binding protein 3                            |
| GO nucleus | 305 | 4735 | 0.989 | 5083 paired box 9                                                             |
| GO nucleus | 305 | 4735 | 0.989 | 51085 MLX interacting protein-like                                            |
| GO nucleus | 305 | 4735 | 0.989 | 51274 Kruppel-like factor 3 (basic)                                           |
| GO nucleus | 305 | 4735 | 0.989 | 51523 CXXC finger 5                                                           |
| GO nucleus | 305 | 4735 | 0.989 | 51621 Kruppel-like factor 13                                                  |
| GO nucleus | 305 | 4735 | 0.989 | 51655 RAS, dexamethasone-induced 1                                            |
| GO nucleus | 305 | 4735 | 0.989 | 51710 zinc finger protein 44                                                  |
| GO nucleus | 305 | 4735 | 0.989 | 51754 transmembrane protein 8B                                                |
| GO nucleus | 305 | 4735 | 0.989 | 5187 period homolog 1 (Drosophila)                                            |
| GO nucleus | 305 | 4735 | 0.989 | 5218 cyclin-dependent kinase 14                                               |
| GO nucleus | 305 | 4735 | 0.989 | 5307 paired-like homeodomain 1                                                |

|            |     |      |       |                                                                            |
|------------|-----|------|-------|----------------------------------------------------------------------------|
| GO nucleus | 305 | 4735 | 0.989 | 5308 paired-like homeodomain 2                                             |
| GO nucleus | 305 | 4735 | 0.989 | 5318 plakophilin 2                                                         |
| GO nucleus | 305 | 4735 | 0.989 | 5325 pleiomorphic adenoma gene-like 1                                      |
| GO nucleus | 305 | 4735 | 0.989 | 53347 ubiquitin associated and SH3 domain containing, A                    |
| GO nucleus | 305 | 4735 | 0.989 | 5367 pro-melanin-concentrating hormone                                     |
| GO nucleus | 305 | 4735 | 0.989 | 5371 promyelocytic leukemia                                                |
| GO nucleus | 305 | 4735 | 0.989 | 5396 paired related homeobox 1                                             |
| GO nucleus | 305 | 4735 | 0.989 | 5460 POU class 5 homeobox 1                                                |
| GO nucleus | 305 | 4735 | 0.989 | 5463 POU class 6 homeobox 1                                                |
| GO nucleus | 305 | 4735 | 0.989 | 5465 peroxisome proliferator-activated receptor alpha                      |
| GO nucleus | 305 | 4735 | 0.989 | 54739 XIAP associated factor 1                                             |
| GO nucleus | 305 | 4735 | 0.989 | 54894 ring finger protein 43                                               |
| GO nucleus | 305 | 4735 | 0.989 | 54904 Wolf-Hirschhorn syndrome candidate 1-like 1                          |
| GO nucleus | 305 | 4735 | 0.989 | 54961 slingshot homolog 3 (Drosophila)                                     |
| GO nucleus | 305 | 4735 | 0.989 | 55140 elongation protein 3 homolog (S. cerevisiae)                         |
| GO nucleus | 305 | 4735 | 0.989 | 55249 YY1 associated protein 1                                             |
| GO nucleus | 305 | 4735 | 0.989 | 55657 zinc finger protein 692                                              |
| GO nucleus | 305 | 4735 | 0.989 | 55693 lysine (K)-specific demethylase 4D                                   |
| GO nucleus | 305 | 4735 | 0.989 | 55705 importin 9                                                           |
| GO nucleus | 305 | 4735 | 0.989 | 55762 zinc finger protein 701                                              |
| GO nucleus | 305 | 4735 | 0.989 | 55769 zinc finger protein 83                                               |
| GO nucleus | 305 | 4735 | 0.989 | 55810 forkhead box J2                                                      |
| GO nucleus | 305 | 4735 | 0.989 | 55870 ash1 (absent, small, or homeotic)-like (Drosophila)                  |
| GO nucleus | 305 | 4735 | 0.989 | 55893 zinc finger protein 395                                              |
| GO nucleus | 305 | 4735 | 0.989 | 56271 brain expressed, X-linked 4                                          |
| GO nucleus | 305 | 4735 | 0.989 | 5696 proteasome (prosome, macropain) subunit, beta type, 8 (large multifur |
| GO nucleus | 305 | 4735 | 0.989 | 56978 PR domain containing 8                                               |
| GO nucleus | 305 | 4735 | 0.989 | 5698 proteasome (prosome, macropain) subunit, beta type, 9 (large multifur |
| GO nucleus | 305 | 4735 | 0.989 | 5699 proteasome (prosome, macropain) subunit, beta type, 10                |
| GO nucleus | 305 | 4735 | 0.989 | 57018 cyclin L1                                                            |
| GO nucleus | 305 | 4735 | 0.989 | 57118 calcium/calmodulin-dependent protein kinase ID                       |
| GO nucleus | 305 | 4735 | 0.989 | 573 BCL2-associated athanogene                                             |
| GO nucleus | 305 | 4735 | 0.989 | 5742 prostaglandin-endoperoxide synthase 1 (prostaglandin G/H synthase a   |
| GO nucleus | 305 | 4735 | 0.989 | 57459 GATA zinc finger domain containing 2B                                |
| GO nucleus | 305 | 4735 | 0.989 | 57594 homeobox and leucine zipper encoding                                 |
| GO nucleus | 305 | 4735 | 0.989 | 5791 protein tyrosine phosphatase, receptor type, E                        |

|            |     |      |       |                                                                                |
|------------|-----|------|-------|--------------------------------------------------------------------------------|
| GO nucleus | 305 | 4735 | 0.989 | 5801 protein tyrosine phosphatase, receptor type, R                            |
| GO nucleus | 305 | 4735 | 0.989 | 604 B-cell CLL/lymphoma 6                                                      |
| GO nucleus | 305 | 4735 | 0.989 | 60485 salvador homolog 1 (Drosophila)                                          |
| GO nucleus | 305 | 4735 | 0.989 | 6096 RAR-related orphan receptor B                                             |
| GO nucleus | 305 | 4735 | 0.989 | 6097 RAR-related orphan receptor C                                             |
| GO nucleus | 305 | 4735 | 0.989 | 6239 ras responsive element binding protein 1                                  |
| GO nucleus | 305 | 4735 | 0.989 | 6256 retinoid X receptor, alpha                                                |
| GO nucleus | 305 | 4735 | 0.989 | 64135 interferon induced with helicase C domain 1                              |
| GO nucleus | 305 | 4735 | 0.989 | 64332 nuclear factor of kappa light polypeptide gene enhancer in B-cells inhib |
| GO nucleus | 305 | 4735 | 0.989 | 64359 nucleoredoxin                                                            |
| GO nucleus | 305 | 4735 | 0.989 | 6446 serum/glucocorticoid regulated kinase 1                                   |
| GO nucleus | 305 | 4735 | 0.989 | 64651 cysteine-serine-rich nuclear protein 1                                   |
| GO nucleus | 305 | 4735 | 0.989 | 6604 SWI/SNF related, matrix associated, actin dependent regulator of chrom    |
| GO nucleus | 305 | 4735 | 0.989 | 6622 synuclein, alpha (non A4 component of amyloid precursor)                  |
| GO nucleus | 305 | 4735 | 0.989 | 6778 signal transducer and activator of transcription 6, interleukin-4 induc   |
| GO nucleus | 305 | 4735 | 0.989 | 687 Kruppel-like factor 9                                                      |
| GO nucleus | 305 | 4735 | 0.989 | 6921 transcription elongation factor B (SIII), polypeptide 1 (15kDa, elongin C |
| GO nucleus | 305 | 4735 | 0.989 | 6941 transcription factor 19                                                   |
| GO nucleus | 305 | 4735 | 0.989 | 7008 thyrotrophic embryonic factor                                             |
| GO nucleus | 305 | 4735 | 0.989 | 7022 transcription factor AP-2 gamma (activating enhancer binding protein 2    |
| GO nucleus | 305 | 4735 | 0.989 | 7026 nuclear receptor subfamily 2, group F, member 2                           |
| GO nucleus | 305 | 4735 | 0.989 | 7069 thyroid hormone responsive (SPOT14 homolog, rat)                          |
| GO nucleus | 305 | 4735 | 0.989 | 7071 Kruppel-like factor 10                                                    |
| GO nucleus | 305 | 4735 | 0.989 | 7089 transducin-like enhancer of split 2 (E(sp1) homolog, Drosophila)          |
| GO nucleus | 305 | 4735 | 0.989 | 7090 transducin-like enhancer of split 3 (E(sp1) homolog, Drosophila)          |
| GO nucleus | 305 | 4735 | 0.989 | 7111 tropomodulin 1                                                            |
| GO nucleus | 305 | 4735 | 0.989 | 7227 trichorhinophalangeal syndrome I                                          |
| GO nucleus | 305 | 4735 | 0.989 | 7404 ubiquitously transcribed tetratricopeptide repeat gene, Y-linked          |
| GO nucleus | 305 | 4735 | 0.989 | 7538 zinc finger protein 36, C3H type, homolog (mouse)                         |
| GO nucleus | 305 | 4735 | 0.989 | 7546 Zic family member 2 (odd-paired homolog, Drosophila)                      |
| GO nucleus | 305 | 4735 | 0.989 | 7565 zinc finger protein 17                                                    |
| GO nucleus | 305 | 4735 | 0.989 | 7597 zinc finger and BTB domain containing 25                                  |
| GO nucleus | 305 | 4735 | 0.989 | 760 carbonic anhydrase II                                                      |
| GO nucleus | 305 | 4735 | 0.989 | 7678 zinc finger protein 124                                                   |
| GO nucleus | 305 | 4735 | 0.989 | 7706 tripartite motif-containing 25                                            |
| GO nucleus | 305 | 4735 | 0.989 | 79444 baculoviral IAP repeat-containing 7                                      |

|            |     |      |       |                                                                                |
|------------|-----|------|-------|--------------------------------------------------------------------------------|
| GO nucleus | 305 | 4735 | 0.989 | 79661 nei endonuclease VIII-like 1 (E. coli)                                   |
| GO nucleus | 305 | 4735 | 0.989 | 79673 zinc finger protein 329                                                  |
| GO nucleus | 305 | 4735 | 0.989 | 79816 transducin-like enhancer of split 6 (E(sp1) homolog, Drosophila)         |
| GO nucleus | 305 | 4735 | 0.989 | 79894 zinc finger protein 672                                                  |
| GO nucleus | 305 | 4735 | 0.989 | 8013 nuclear receptor subfamily 4, group A, member 3                           |
| GO nucleus | 305 | 4735 | 0.989 | 80169 chromosome 17 open reading frame 68                                      |
| GO nucleus | 305 | 4735 | 0.989 | 80714 pre-B-cell leukemia homeobox 4                                           |
| GO nucleus | 305 | 4735 | 0.989 | 80763 chromosome 12 open reading frame 39                                      |
| GO nucleus | 305 | 4735 | 0.989 | 81603 tripartite motif-containing 8                                            |
| GO nucleus | 305 | 4735 | 0.989 | 8313 axin 2                                                                    |
| GO nucleus | 305 | 4735 | 0.989 | 834 caspase 1, apoptosis-related cysteine peptidase (interleukin 1, beta, co   |
| GO nucleus | 305 | 4735 | 0.989 | 83595 SRY (sex determining region Y)-box 7                                     |
| GO nucleus | 305 | 4735 | 0.989 | 83666 poly (ADP-ribose) polymerase family, member 9                            |
| GO nucleus | 305 | 4735 | 0.989 | 83719 yippee-like 3 (Drosophila)                                               |
| GO nucleus | 305 | 4735 | 0.989 | 84124 zinc finger protein 394                                                  |
| GO nucleus | 305 | 4735 | 0.989 | 84159 AT rich interactive domain 5B (MRF1-like)                                |
| GO nucleus | 305 | 4735 | 0.989 | 84366 prostate cancer susceptibility candidate                                 |
| GO nucleus | 305 | 4735 | 0.989 | 8462 Kruppel-like factor 11                                                    |
| GO nucleus | 305 | 4735 | 0.989 | 84858 zinc finger protein 503                                                  |
| GO nucleus | 305 | 4735 | 0.989 | 84875 poly (ADP-ribose) polymerase family, member 10                           |
| GO nucleus | 305 | 4735 | 0.989 | 84911 zinc finger protein 382                                                  |
| GO nucleus | 305 | 4735 | 0.989 | 84941 hematopoietic SH2 domain containing                                      |
| GO nucleus | 305 | 4735 | 0.989 | 84969 TOX high mobility group box family member 2                              |
| GO nucleus | 305 | 4735 | 0.989 | 85004 RAS-like, estrogen-regulated, growth inhibitor                           |
| GO nucleus | 305 | 4735 | 0.989 | 8531 cold shock domain protein A                                               |
| GO nucleus | 305 | 4735 | 0.989 | 85416 Zic family member 5 (odd-paired homolog, Drosophila)                     |
| GO nucleus | 305 | 4735 | 0.989 | 85441 peroxisomal proliferator-activated receptor A interacting complex 285    |
| GO nucleus | 305 | 4735 | 0.989 | 8553 basic helix-loop-helix family, member e40                                 |
| GO nucleus | 305 | 4735 | 0.989 | 8556 CDC14 cell division cycle 14 homolog A (S. cerevisiae)                    |
| GO nucleus | 305 | 4735 | 0.989 | 862 runt-related transcription factor 1; translocated to, 1 (cyclin D-related) |
| GO nucleus | 305 | 4735 | 0.989 | 8631 src kinase associated phosphoprotein 1                                    |
| GO nucleus | 305 | 4735 | 0.989 | 8653 DEAD (Asp-Glu-Ala-Asp) box polypeptide 3, Y-linked                        |
| GO nucleus | 305 | 4735 | 0.989 | 8848 TSC22 domain family, member 1                                             |
| GO nucleus | 305 | 4735 | 0.989 | 8863 period homolog 3 (Drosophila)                                             |
| GO nucleus | 305 | 4735 | 0.989 | 8864 period homolog 2 (Drosophila)                                             |
| GO nucleus | 305 | 4735 | 0.989 | 8900 cyclin A1                                                                 |

|                                |     |      |       |                                                                       |
|--------------------------------|-----|------|-------|-----------------------------------------------------------------------|
| GO nucleus                     | 305 | 4735 | 0.989 | 8912 calcium channel, voltage-dependent, T type, alpha 1H subunit     |
| GO nucleus                     | 305 | 4735 | 0.989 | 8996 nucleolar protein 3 (apoptosis repressor with CARD domain)       |
| GO nucleus                     | 305 | 4735 | 0.989 | 90592 zinc finger protein 700                                         |
| GO nucleus                     | 305 | 4735 | 0.989 | 90993 cAMP responsive element binding protein 3-like 1                |
| GO nucleus                     | 305 | 4735 | 0.989 | 91607 schlafen family member 11                                       |
| GO nucleus                     | 305 | 4735 | 0.989 | 91748 chromosome 14 open reading frame 43                             |
| GO nucleus                     | 305 | 4735 | 0.989 | 92283 zinc finger protein 461                                         |
| GO nucleus                     | 305 | 4735 | 0.989 | 9263 serine/threonine kinase 17a                                      |
| GO nucleus                     | 305 | 4735 | 0.989 | 92822 zinc finger protein 276                                         |
| GO nucleus                     | 305 | 4735 | 0.989 | 9314 Kruppel-like factor 4 (gut)                                      |
| GO nucleus                     | 305 | 4735 | 0.989 | 9324 high mobility group nucleosomal binding domain 3                 |
| GO nucleus                     | 305 | 4735 | 0.989 | 93349 SP140 nuclear body protein-like                                 |
| GO nucleus                     | 305 | 4735 | 0.989 | 9414 tight junction protein 2 (zona occludens 2)                      |
| GO nucleus                     | 305 | 4735 | 0.989 | 9422 zinc finger protein 264                                          |
| GO nucleus                     | 305 | 4735 | 0.989 | 9496 T-box 4                                                          |
| GO nucleus                     | 305 | 4735 | 0.989 | 952 CD38 molecule                                                     |
| GO nucleus                     | 305 | 4735 | 0.989 | 9572 nuclear receptor subfamily 1, group D, member 1                  |
| GO nucleus                     | 305 | 4735 | 0.989 | 9633 metallothionein-like 5, testis-specific (tesmin)                 |
| GO nucleus                     | 305 | 4735 | 0.989 | 9734 histone deacetylase 9                                            |
| GO nucleus                     | 305 | 4735 | 0.989 | 9764 KIAA0513                                                         |
| GO nucleus                     | 305 | 4735 | 0.989 | 9875 URB1 ribosome biogenesis 1 homolog ( <i>S. cerevisiae</i> )      |
| GO nucleus                     | 305 | 4735 | 0.989 | 9904 RNA binding motif protein 19                                     |
| GO nucleus                     | 305 | 4735 | 0.989 | 9935 v-maf musculoaponeurotic fibrosarcoma oncogene homolog B (avian) |
| GO nucleus                     | 305 | 4735 | 0.989 | 9971 nuclear receptor subfamily 1, group H, member 4                  |
| GO nucleus                     | 305 | 4735 | 0.989 | 9985 REC8 homolog (yeast)                                             |
| GO regulation of transcription | 64  | 956  | 0.989 | 10014 histone deacetylase 5                                           |
| GO regulation of transcription | 64  | 956  | 0.989 | 10628 thioredoxin interacting protein                                 |
| GO regulation of transcription | 64  | 956  | 0.989 | 10957 proline-rich nuclear receptor coactivator 1                     |
| GO regulation of transcription | 64  | 956  | 0.989 | 11030 RNA binding protein with multiple splicing                      |
| GO regulation of transcription | 64  | 956  | 0.989 | 11279 Kruppel-like factor 8                                           |
| GO regulation of transcription | 64  | 956  | 0.989 | 135112 nuclear receptor coactivator 7                                 |
| GO regulation of transcription | 64  | 956  | 0.989 | 163115 zinc finger protein 781                                        |
| GO regulation of transcription | 64  | 956  | 0.989 | 1785 dynamin 2                                                        |
| GO regulation of transcription | 64  | 956  | 0.989 | 1960 early growth response 3                                          |
| GO regulation of transcription | 64  | 956  | 0.989 | 2033 E1A binding protein p300                                         |
| GO regulation of transcription | 64  | 956  | 0.989 | 2066 v-erb-a erythroblastic leukemia viral oncogene homolog 4 (avian) |

|    |                             |    |     |       |                                                                                |
|----|-----------------------------|----|-----|-------|--------------------------------------------------------------------------------|
| GO | regulation of transcription | 64 | 956 | 0.989 | 220359 tigger transposable element derived 3                                   |
| GO | regulation of transcription | 64 | 956 | 0.989 | 22807 IKAROS family zinc finger 2 (Helios)                                     |
| GO | regulation of transcription | 64 | 956 | 0.989 | 22904 strawberry notch homolog 2 (Drosophila)                                  |
| GO | regulation of transcription | 64 | 956 | 0.989 | 23081 lysine (K)-specific demethylase 4C                                       |
| GO | regulation of transcription | 64 | 956 | 0.989 | 23099 zinc finger and BTB domain containing 43                                 |
| GO | regulation of transcription | 64 | 956 | 0.989 | 23119 hypermethylated in cancer 2                                              |
| GO | regulation of transcription | 64 | 956 | 0.989 | 23373 CREB regulated transcription coactivator 1                               |
| GO | regulation of transcription | 64 | 956 | 0.989 | 23492 chromobox homolog 7                                                      |
| GO | regulation of transcription | 64 | 956 | 0.989 | 23648 single stranded DNA binding protein 3                                    |
| GO | regulation of transcription | 64 | 956 | 0.989 | 25946 zinc finger protein 385A                                                 |
| GO | regulation of transcription | 64 | 956 | 0.989 | 284346 zinc finger protein 575                                                 |
| GO | regulation of transcription | 64 | 956 | 0.989 | 28996 homeodomain interacting protein kinase 2                                 |
| GO | regulation of transcription | 64 | 956 | 0.989 | 387496 RAS-like, family 11, member A                                           |
| GO | regulation of transcription | 64 | 956 | 0.989 | 388567 zinc finger protein 749                                                 |
| GO | regulation of transcription | 64 | 956 | 0.989 | 389058 Sp5 transcription factor                                                |
| GO | regulation of transcription | 64 | 956 | 0.989 | 429 achaete-scute complex homolog 1 (Drosophila)                               |
| GO | regulation of transcription | 64 | 956 | 0.989 | 4849 CCR4-NOT transcription complex, subunit 3                                 |
| GO | regulation of transcription | 64 | 956 | 0.989 | 4851 Notch homolog 1, translocation-associated (Drosophila)                    |
| GO | regulation of transcription | 64 | 956 | 0.989 | 51274 Kruppel-like factor 3 (basic)                                            |
| GO | regulation of transcription | 64 | 956 | 0.989 | 51621 Kruppel-like factor 13                                                   |
| GO | regulation of transcription | 64 | 956 | 0.989 | 5325 pleiomorphic adenoma gene-like 1                                          |
| GO | regulation of transcription | 64 | 956 | 0.989 | 54904 Wolf-Hirschhorn syndrome candidate 1-like 1                              |
| GO | regulation of transcription | 64 | 956 | 0.989 | 55140 elongation protein 3 homolog (S. cerevisiae)                             |
| GO | regulation of transcription | 64 | 956 | 0.989 | 55657 zinc finger protein 692                                                  |
| GO | regulation of transcription | 64 | 956 | 0.989 | 55693 lysine (K)-specific demethylase 4D                                       |
| GO | regulation of transcription | 64 | 956 | 0.989 | 55870 ash1 (absent, small, or homeotic)-like (Drosophila)                      |
| GO | regulation of transcription | 64 | 956 | 0.989 | 56978 PR domain containing 8                                                   |
| GO | regulation of transcription | 64 | 956 | 0.989 | 57018 cyclin L1                                                                |
| GO | regulation of transcription | 64 | 956 | 0.989 | 604 B-cell CLL/lymphoma 6                                                      |
| GO | regulation of transcription | 64 | 956 | 0.989 | 64332 nuclear factor of kappa light polypeptide gene enhancer in B-cells inhib |
| GO | regulation of transcription | 64 | 956 | 0.989 | 687 Kruppel-like factor 9                                                      |
| GO | regulation of transcription | 64 | 956 | 0.989 | 6921 transcription elongation factor B (SIII), polypeptide 1 (15kDa, elongin C |
| GO | regulation of transcription | 64 | 956 | 0.989 | 6941 transcription factor 19                                                   |
| GO | regulation of transcription | 64 | 956 | 0.989 | 7071 Kruppel-like factor 10                                                    |
| GO | regulation of transcription | 64 | 956 | 0.989 | 7089 transducin-like enhancer of split 2 (E(sp1) homolog, Drosophila)          |
| GO | regulation of transcription | 64 | 956 | 0.989 | 7597 zinc finger and BTB domain containing 25                                  |

|    |                                                  |    |      |       |                                                                               |
|----|--------------------------------------------------|----|------|-------|-------------------------------------------------------------------------------|
| GO | regulation of transcription                      | 64 | 956  | 0.989 | 79673 zinc finger protein 329                                                 |
| GO | regulation of transcription                      | 64 | 956  | 0.989 | 79816 transducin-like enhancer of split 6 (E(sp1) homolog, Drosophila)        |
| GO | regulation of transcription                      | 64 | 956  | 0.989 | 79894 zinc finger protein 672                                                 |
| GO | regulation of transcription                      | 64 | 956  | 0.989 | 83595 SRY (sex determining region Y)-box 7                                    |
| GO | regulation of transcription                      | 64 | 956  | 0.989 | 84159 AT rich interactive domain 5B (MRF1-like)                               |
| GO | regulation of transcription                      | 64 | 956  | 0.989 | 8462 Kruppel-like factor 11                                                   |
| GO | regulation of transcription                      | 64 | 956  | 0.989 | 84858 zinc finger protein 503                                                 |
| GO | regulation of transcription                      | 64 | 956  | 0.989 | 84969 TOX high mobility group box family member 2                             |
| GO | regulation of transcription                      | 64 | 956  | 0.989 | 8543 LIM domain only 4                                                        |
| GO | regulation of transcription                      | 64 | 956  | 0.989 | 85441 peroxisomal proliferator-activated receptor A interacting complex 285   |
| GO | regulation of transcription                      | 64 | 956  | 0.989 | 91 activin A receptor, type IB                                                |
| GO | regulation of transcription                      | 64 | 956  | 0.989 | 91748 chromosome 14 open reading frame 43                                     |
| GO | regulation of transcription                      | 64 | 956  | 0.989 | 92822 zinc finger protein 276                                                 |
| GO | regulation of transcription                      | 64 | 956  | 0.989 | 9314 Kruppel-like factor 4 (gut)                                              |
| GO | regulation of transcription                      | 64 | 956  | 0.989 | 94 activin A receptor type II-like 1                                          |
| GO | regulation of transcription                      | 64 | 956  | 0.989 | 9619 ATP-binding cassette, sub-family G (WHITE), member 1                     |
| GO | regulation of transcription                      | 64 | 956  | 0.989 | 9734 histone deacetylase 9                                                    |
| GO | specific transcriptional repressor activity      | 2  | 38   | 0.989 | 10014 histone deacetylase 5                                                   |
| GO | specific transcriptional repressor activity      | 2  | 38   | 0.989 | 9734 histone deacetylase 9                                                    |
| GO | homophilic cell adhesion                         | 8  | 135  | 0.989 | 1004 cadherin 6, type 2, K-cadherin (fetal kidney)                            |
| GO | homophilic cell adhesion                         | 8  | 135  | 0.989 | 1009 cadherin 11, type 2, OB-cadherin (osteoblast)                            |
| GO | homophilic cell adhesion                         | 8  | 135  | 0.989 | 1014 cadherin 16, KSP-cadherin                                                |
| GO | homophilic cell adhesion                         | 8  | 135  | 0.989 | 1016 cadherin 18, type 2                                                      |
| GO | homophilic cell adhesion                         | 8  | 135  | 0.989 | 10205 myelin protein zero-like 2                                              |
| GO | homophilic cell adhesion                         | 8  | 135  | 0.989 | 5099 protocadherin 7                                                          |
| GO | homophilic cell adhesion                         | 8  | 135  | 0.989 | 57453 Down syndrome cell adhesion molecule like 1                             |
| GO | homophilic cell adhesion                         | 8  | 135  | 0.989 | 57863 cell adhesion molecule 3                                                |
| GO | Wnt receptor signaling pathway through G-protein | 1  | 23   | 0.989 | 10076 protein tyrosine phosphatase, receptor type, U                          |
| GO | RNA splicing                                     | 5  | 251  | 0.989 | 10081 programmed cell death 7                                                 |
| GO | RNA splicing                                     | 5  | 251  | 0.989 | 10891 peroxisome proliferator-activated receptor gamma, coactivator 1 alpha   |
| GO | RNA splicing                                     | 5  | 251  | 0.989 | 2521 fused in sarcoma                                                         |
| GO | RNA splicing                                     | 5  | 251  | 0.989 | 3192 heterogeneous nuclear ribonucleoprotein U (scaffold attachment factor 1) |
| GO | RNA splicing                                     | 5  | 251  | 0.989 | 8996 nucleolar protein 3 (apoptosis repressor with CARD domain)               |
| GO | carbohydrate biosynthetic process                | 1  | 17   | 0.989 | 10090 uronyl-2-sulfotransferase                                               |
| GO | transferase activity                             | 57 | 1127 | 0.989 | 10090 uronyl-2-sulfotransferase                                               |
| GO | transferase activity                             | 57 | 1127 | 0.989 | 10162 lysophosphatidylcholine acyltransferase 3                               |

|                         |    |      |       |                                                                        |
|-------------------------|----|------|-------|------------------------------------------------------------------------|
| GO transferase activity | 57 | 1127 | 0.989 | 10769 polo-like kinase 2 (Drosophila)                                  |
| GO transferase activity | 57 | 1127 | 0.989 | 11200 CHK2 checkpoint homolog (S. pombe)                               |
| GO transferase activity | 57 | 1127 | 0.989 | 11213 interleukin-1 receptor-associated kinase 3                       |
| GO transferase activity | 57 | 1127 | 0.989 | 127933 U2AF homology motif (UHM) kinase 1                              |
| GO transferase activity | 57 | 1127 | 0.989 | 130399 activin A receptor, type IC                                     |
| GO transferase activity | 57 | 1127 | 0.989 | 140901 serine/threonine kinase 35                                      |
| GO transferase activity | 57 | 1127 | 0.989 | 150094 salt-inducible kinase 1                                         |
| GO transferase activity | 57 | 1127 | 0.989 | 154141 membrane bound O-acyltransferase domain containing 1            |
| GO transferase activity | 57 | 1127 | 0.989 | 1612 death-associated protein kinase 1                                 |
| GO transferase activity | 57 | 1127 | 0.989 | 166929 sphingomyelin synthase 2                                        |
| GO transferase activity | 57 | 1127 | 0.989 | 1969 EPH receptor A2                                                   |
| GO transferase activity | 57 | 1127 | 0.989 | 2033 E1A binding protein p300                                          |
| GO transferase activity | 57 | 1127 | 0.989 | 2044 EPH receptor A5                                                   |
| GO transferase activity | 57 | 1127 | 0.989 | 205 adenylate kinase 3-like 1                                          |
| GO transferase activity | 57 | 1127 | 0.989 | 2066 v-erb-a erythroblastic leukemia viral oncogene homolog 4 (avian)  |
| GO transferase activity | 57 | 1127 | 0.989 | 2263 fibroblast growth factor receptor 2                               |
| GO transferase activity | 57 | 1127 | 0.989 | 23043 TRAF2 and NCK interacting kinase                                 |
| GO transferase activity | 57 | 1127 | 0.989 | 23387 SIK family kinase 3                                              |
| GO transferase activity | 57 | 1127 | 0.989 | 23604 death-associated protein kinase 2                                |
| GO transferase activity | 57 | 1127 | 0.989 | 27434 polymerase (DNA directed), mu                                    |
| GO transferase activity | 57 | 1127 | 0.989 | 28996 homeodomain interacting protein kinase 2                         |
| GO transferase activity | 57 | 1127 | 0.989 | 2947 glutathione S-transferase mu 3 (brain)                            |
| GO transferase activity | 57 | 1127 | 0.989 | 3643 insulin receptor                                                  |
| GO transferase activity | 57 | 1127 | 0.989 | 375449 microtubule associated serine/threonine kinase family member 4  |
| GO transferase activity | 57 | 1127 | 0.989 | 3815 v-kit Hardy-Zuckerman 4 feline sarcoma viral oncogene homolog     |
| GO transferase activity | 57 | 1127 | 0.989 | 415116 pim-3 oncogene                                                  |
| GO transferase activity | 57 | 1127 | 0.989 | 4293 mitogen-activated protein kinase kinase kinase 9                  |
| GO transferase activity | 57 | 1127 | 0.989 | 4486 macrophage stimulating 1 receptor (c-met-related tyrosine kinase) |
| GO transferase activity | 57 | 1127 | 0.989 | 4638 myosin light chain kinase                                         |
| GO transferase activity | 57 | 1127 | 0.989 | 4915 neurotrophic tyrosine kinase, receptor, type 2                    |
| GO transferase activity | 57 | 1127 | 0.989 | 4939 2'-5'-oligoadenylate synthetase 2, 69/71kDa                       |
| GO transferase activity | 57 | 1127 | 0.989 | 5063 p21 protein (Cdc42/Rac)-activated kinase 3                        |
| GO transferase activity | 57 | 1127 | 0.989 | 5129 cyclin-dependent kinase 18                                        |
| GO transferase activity | 57 | 1127 | 0.989 | 5218 cyclin-dependent kinase 14                                        |
| GO transferase activity | 57 | 1127 | 0.989 | 54904 Wolf-Hirschhorn syndrome candidate 1-like 1                      |
| GO transferase activity | 57 | 1127 | 0.989 | 54947 lysophosphatidylcholine acyltransferase 2                        |



|                         |    |      |       |                                                                             |
|-------------------------|----|------|-------|-----------------------------------------------------------------------------|
| GO transferase activity | 57 | 1127 | 0.989 | 55140 elongation protein 3 homolog ( <i>S. cerevisiae</i> )                 |
| GO transferase activity | 57 | 1127 | 0.989 | 55870 ash1 (absent, small, or homeotic)-like ( <i>Drosophila</i> )          |
| GO transferase activity | 57 | 1127 | 0.989 | 5608 mitogen-activated protein kinase kinase 6                              |
| GO transferase activity | 57 | 1127 | 0.989 | 57118 calcium/calmodulin-dependent protein kinase ID                        |
| GO transferase activity | 57 | 1127 | 0.989 | 64064 3-oxoacid CoA transferase 2                                           |
| GO transferase activity | 57 | 1127 | 0.989 | 6446 serum/glucocorticoid regulated kinase 1                                |
| GO transferase activity | 57 | 1127 | 0.989 | 6819 sulfotransferase family, cytosolic, 1C, member 2                       |
| GO transferase activity | 57 | 1127 | 0.989 | 6850 spleen tyrosine kinase                                                 |
| GO transferase activity | 57 | 1127 | 0.989 | 81788 NUAKE family, SNF1-like kinase, 2                                     |
| GO transferase activity | 57 | 1127 | 0.989 | 83666 poly (ADP-ribose) polymerase family, member 9                         |
| GO transferase activity | 57 | 1127 | 0.989 | 84033 obscurin, cytoskeletal calmodulin and titin-interacting RhoGEF        |
| GO transferase activity | 57 | 1127 | 0.989 | 8509 N-deacetylase/N-sulfotransferase (heparan glucosaminyl) 2              |
| GO transferase activity | 57 | 1127 | 0.989 | 8527 diacylglycerol kinase, delta 130kDa                                    |
| GO transferase activity | 57 | 1127 | 0.989 | 9064 mitogen-activated protein kinase kinase kinase 6                       |
| GO transferase activity | 57 | 1127 | 0.989 | 91 activin A receptor, type IB                                              |
| GO transferase activity | 57 | 1127 | 0.989 | 91461 protein kinase domain containing, cytoplasmic homolog (mouse)         |
| GO transferase activity | 57 | 1127 | 0.989 | 9263 serine/threonine kinase 17a                                            |
| GO transferase activity | 57 | 1127 | 0.989 | 94 activin A receptor type II-like 1                                        |
| GO transferase activity | 57 | 1127 | 0.989 | 9435 carbohydrate (N-acetylglucosamine-6-O) sulfotransferase 2              |
| GO lysosomal membrane   | 2  | 83   | 0.989 | 10103 tetraspanin 1                                                         |
| GO lysosomal membrane   | 2  | 83   | 0.989 | 55332 DNA-damage regulated autophagy modulator 1                            |
| GO soluble fraction     | 20 | 315  | 0.989 | 10106 CTD (carboxy-terminal domain, RNA polymerase II, polypeptide A) sma   |
| GO soluble fraction     | 20 | 315  | 0.989 | 10516 fibulin 5                                                             |
| GO soluble fraction     | 20 | 315  | 0.989 | 1508 cathepsin B                                                            |
| GO soluble fraction     | 20 | 315  | 0.989 | 1604 CD55 molecule, decay accelerating factor for complement (Cromer blo    |
| GO soluble fraction     | 20 | 315  | 0.989 | 1803 dipeptidyl-peptidase 4                                                 |
| GO soluble fraction     | 20 | 315  | 0.989 | 183 angiotensinogen (serpin peptidase inhibitor, clade A, member 8)         |
| GO soluble fraction     | 20 | 315  | 0.989 | 1843 dual specificity phosphatase 1                                         |
| GO soluble fraction     | 20 | 315  | 0.989 | 2026 enolase 2 (gamma, neuronal)                                            |
| GO soluble fraction     | 20 | 315  | 0.989 | 240 arachidonate 5-lipoxygenase                                             |
| GO soluble fraction     | 20 | 315  | 0.989 | 2517 fucosidase, alpha-L- 1, tissue                                         |
| GO soluble fraction     | 20 | 315  | 0.989 | 26281 fibroblast growth factor 20                                           |
| GO soluble fraction     | 20 | 315  | 0.989 | 27090 ST6 (alpha-N-acetyl-neuraminy-2,3-beta-galactosyl-1,3)-N-acetylgalact |
| GO soluble fraction     | 20 | 315  | 0.989 | 2947 glutathione S-transferase mu 3 (brain)                                 |
| GO soluble fraction     | 20 | 315  | 0.989 | 3034 histidine ammonia-lyase                                                |
| GO soluble fraction     | 20 | 315  | 0.989 | 3643 insulin receptor                                                       |

|    |                    |    |     |       |                                                                  |
|----|--------------------|----|-----|-------|------------------------------------------------------------------|
| GO | soluble fraction   | 20 | 315 | 0.989 | 5046 proprotein convertase subtilisin/kexin type 6               |
| GO | soluble fraction   | 20 | 315 | 0.989 | 51655 RAS, dexamethasone-induced 1                               |
| GO | soluble fraction   | 20 | 315 | 0.989 | 5577 protein kinase, cAMP-dependent, regulatory, type II, beta   |
| GO | soluble fraction   | 20 | 315 | 0.989 | 8839 WNT1 inducible signaling pathway protein 2                  |
| GO | soluble fraction   | 20 | 315 | 0.989 | 9633 metallothionein-like 5, testis-specific (tesmin)            |
| GO | cellular_component | 34 | 528 | 0.989 | 10116 fem-1 homolog b (C. elegans)                               |
| GO | cellular_component | 34 | 528 | 0.989 | 10231 regulator of calcineurin 2                                 |
| GO | cellular_component | 34 | 528 | 0.989 | 1154 cytokine inducible SH2-containing protein                   |
| GO | cellular_component | 34 | 528 | 0.989 | 117157 SH2 domain containing 1B                                  |
| GO | cellular_component | 34 | 528 | 0.989 | 1953 multiple EGF-like-domains 6                                 |
| GO | cellular_component | 34 | 528 | 0.989 | 202 absent in melanoma 1                                         |
| GO | cellular_component | 34 | 528 | 0.989 | 22904 strawberry notch homolog 2 (Drosophila)                    |
| GO | cellular_component | 34 | 528 | 0.989 | 23092 Rho GTPase activating protein 26                           |
| GO | cellular_component | 34 | 528 | 0.989 | 23179 ral guanine nucleotide dissociation stimulator-like 1      |
| GO | cellular_component | 34 | 528 | 0.989 | 23348 dedicator of cytokinesis 9                                 |
| GO | cellular_component | 34 | 528 | 0.989 | 23682 RAB38, member RAS oncogene family                          |
| GO | cellular_component | 34 | 528 | 0.989 | 25837 RAB26, member RAS oncogene family                          |
| GO | cellular_component | 34 | 528 | 0.989 | 26053 autism susceptibility candidate 2                          |
| GO | cellular_component | 34 | 528 | 0.989 | 271 adenosine monophosphate deaminase 2                          |
| GO | cellular_component | 34 | 528 | 0.989 | 27202 G protein-coupled receptor 77                              |
| GO | cellular_component | 34 | 528 | 0.989 | 3268 ArfGAP with FG repeats 2                                    |
| GO | cellular_component | 34 | 528 | 0.989 | 3437 interferon-induced protein with tetratricopeptide repeats 3 |
| GO | cellular_component | 34 | 528 | 0.989 | 345275 hydroxysteroid (17-beta) dehydrogenase 13                 |
| GO | cellular_component | 34 | 528 | 0.989 | 376940 zinc finger CCCH-type containing 6                        |
| GO | cellular_component | 34 | 528 | 0.989 | 4007 prickly homolog 3 (Drosophila)                              |
| GO | cellular_component | 34 | 528 | 0.989 | 4038 low density lipoprotein receptor-related protein 4          |
| GO | cellular_component | 34 | 528 | 0.989 | 4246 secretoglobin, family 2A, member 1                          |
| GO | cellular_component | 34 | 528 | 0.989 | 4293 mitogen-activated protein kinase kinase kinase 9            |
| GO | cellular_component | 34 | 528 | 0.989 | 50486 G0/G1switch 2                                              |
| GO | cellular_component | 34 | 528 | 0.989 | 5129 cyclin-dependent kinase 18                                  |
| GO | cellular_component | 34 | 528 | 0.989 | 54436 SH3 domain and tetratricopeptide repeats 1                 |
| GO | cellular_component | 34 | 528 | 0.989 | 54664 transmembrane protein 106B                                 |
| GO | cellular_component | 34 | 528 | 0.989 | 57464 family with sequence similarity 40, member B               |
| GO | cellular_component | 34 | 528 | 0.989 | 57535 KIAA1324                                                   |
| GO | cellular_component | 34 | 528 | 0.989 | 6343 secretin                                                    |
| GO | cellular_component | 34 | 528 | 0.989 | 64651 cysteine-serine-rich nuclear protein 1                     |

|                       |    |      |       |                                                                               |
|-----------------------|----|------|-------|-------------------------------------------------------------------------------|
| GO cellular_component | 34 | 528  | 0.989 | 80833 apolipoprotein L, 3                                                     |
| GO cellular_component | 34 | 528  | 0.989 | 8382 non-metastatic cells 5, protein expressed in (nucleoside-diphosphate k   |
| GO cellular_component | 34 | 528  | 0.989 | 8622 phosphodiesterase 8B                                                     |
| GO cytosol            | 59 | 1230 | 0.989 | 10156 RAS p21 protein activator 4                                             |
| GO cytosol            | 59 | 1230 | 0.989 | 10252 sprouty homolog 1, antagonist of FGF signaling (Drosophila)             |
| GO cytosol            | 59 | 1230 | 0.989 | 10253 sprouty homolog 2 (Drosophila)                                          |
| GO cytosol            | 59 | 1230 | 0.989 | 10891 peroxisome proliferator-activated receptor gamma, coactivator 1 alpha   |
| GO cytosol            | 59 | 1230 | 0.989 | 1152 creatine kinase, brain                                                   |
| GO cytosol            | 59 | 1230 | 0.989 | 150094 salt-inducible kinase 1                                                |
| GO cytosol            | 59 | 1230 | 0.989 | 1915 eukaryotic translation elongation factor 1 alpha 1                       |
| GO cytosol            | 59 | 1230 | 0.989 | 196383 Rab interacting lysosomal protein-like 2                               |
| GO cytosol            | 59 | 1230 | 0.989 | 1983 eukaryotic translation initiation factor 5                               |
| GO cytosol            | 59 | 1230 | 0.989 | 23263 MCF.2 cell line derived transforming sequence-like                      |
| GO cytosol            | 59 | 1230 | 0.989 | 23365 Rho guanine nucleotide exchange factor (GEF) 12                         |
| GO cytosol            | 59 | 1230 | 0.989 | 240 arachidonate 5-lipoxygenase                                               |
| GO cytosol            | 59 | 1230 | 0.989 | 26119 low density lipoprotein receptor adaptor protein 1                      |
| GO cytosol            | 59 | 1230 | 0.989 | 2737 GLI family zinc finger 3                                                 |
| GO cytosol            | 59 | 1230 | 0.989 | 2752 glutamate-ammonia ligase (glutamine synthetase)                          |
| GO cytosol            | 59 | 1230 | 0.989 | 3034 histidine ammonia-lyase                                                  |
| GO cytosol            | 59 | 1230 | 0.989 | 3643 insulin receptor                                                         |
| GO cytosol            | 59 | 1230 | 0.989 | 3665 interferon regulatory factor 7                                           |
| GO cytosol            | 59 | 1230 | 0.989 | 3725 jun oncogene                                                             |
| GO cytosol            | 59 | 1230 | 0.989 | 4087 SMAD family member 2                                                     |
| GO cytosol            | 59 | 1230 | 0.989 | 440603 BCL2-like 15                                                           |
| GO cytosol            | 59 | 1230 | 0.989 | 4524 5,10-methylenetetrahydrofolate reductase (NADPH)                         |
| GO cytosol            | 59 | 1230 | 0.989 | 4599 myxovirus (influenza virus) resistance 1, interferon-inducible protein p |
| GO cytosol            | 59 | 1230 | 0.989 | 4638 myosin light chain kinase                                                |
| GO cytosol            | 59 | 1230 | 0.989 | 4792 nuclear factor of kappa light polypeptide gene enhancer in B-cells inhib |
| GO cytosol            | 59 | 1230 | 0.989 | 48 aconitase 1, soluble                                                       |
| GO cytosol            | 59 | 1230 | 0.989 | 4886 neuropeptide Y receptor Y1                                               |
| GO cytosol            | 59 | 1230 | 0.989 | 5071 Parkinson disease (autosomal recessive, juvenile) 2, parkin              |
| GO cytosol            | 59 | 1230 | 0.989 | 50865 heme binding protein 1                                                  |
| GO cytosol            | 59 | 1230 | 0.989 | 5132 phosducin                                                                |
| GO cytosol            | 59 | 1230 | 0.989 | 5136 phosphodiesterase 1A, calmodulin-dependent                               |
| GO cytosol            | 59 | 1230 | 0.989 | 5152 phosphodiesterase 9A                                                     |
| GO cytosol            | 59 | 1230 | 0.989 | 5218 cyclin-dependent kinase 14                                               |

|                                         |    |      |       |                                                                                 |
|-----------------------------------------|----|------|-------|---------------------------------------------------------------------------------|
| GO cytosol                              | 59 | 1230 | 0.989 | 5295 phosphoinositide-3-kinase, regulatory subunit 1 (alpha)                    |
| GO cytosol                              | 59 | 1230 | 0.989 | 53347 ubiquitin associated and SH3 domain containing, A                         |
| GO cytosol                              | 59 | 1230 | 0.989 | 5460 POU class 5 homeobox 1                                                     |
| GO cytosol                              | 59 | 1230 | 0.989 | 55740 enabled homolog (Drosophila)                                              |
| GO cytosol                              | 59 | 1230 | 0.989 | 5577 protein kinase, cAMP-dependent, regulatory, type II, beta                  |
| GO cytosol                              | 59 | 1230 | 0.989 | 57104 patatin-like phospholipase domain containing 2                            |
| GO cytosol                              | 59 | 1230 | 0.989 | 57132 chromatin modifying protein 1B                                            |
| GO cytosol                              | 59 | 1230 | 0.989 | 57161 pellino homolog 2 (Drosophila)                                            |
| GO cytosol                              | 59 | 1230 | 0.989 | 5900 ral guanine nucleotide dissociation stimulator                             |
| GO cytosol                              | 59 | 1230 | 0.989 | 64083 golgi phosphoprotein 3 (coat-protein)                                     |
| GO cytosol                              | 59 | 1230 | 0.989 | 64127 nucleotide-binding oligomerization domain containing 2                    |
| GO cytosol                              | 59 | 1230 | 0.989 | 64359 nucleoredoxin                                                             |
| GO cytosol                              | 59 | 1230 | 0.989 | 6622 synuclein, alpha (non A4 component of amyloid precursor)                   |
| GO cytosol                              | 59 | 1230 | 0.989 | 6710 spectrin, beta, erythrocytic                                               |
| GO cytosol                              | 59 | 1230 | 0.989 | 6921 transcription elongation factor B (SIII), polypeptide 1 (15kDa, elongin C) |
| GO cytosol                              | 59 | 1230 | 0.989 | 7538 zinc finger protein 36, C3H type, homolog (mouse)                          |
| GO cytosol                              | 59 | 1230 | 0.989 | 760 carbonic anhydrase II                                                       |
| GO cytosol                              | 59 | 1230 | 0.989 | 84033 obscurin, cytoskeletal calmodulin and titin-interacting RhoGEF            |
| GO cytosol                              | 59 | 1230 | 0.989 | 85004 RAS-like, estrogen-regulated, growth inhibitor                            |
| GO cytosol                              | 59 | 1230 | 0.989 | 8660 insulin receptor substrate 2                                               |
| GO cytosol                              | 59 | 1230 | 0.989 | 8900 cyclin A1                                                                  |
| GO cytosol                              | 59 | 1230 | 0.989 | 8996 nucleolar protein 3 (apoptosis repressor with CARD domain)                 |
| GO cytosol                              | 59 | 1230 | 0.989 | 9050 proline-serine-threonine phosphatase interacting protein 2                 |
| GO cytosol                              | 59 | 1230 | 0.989 | 9182 Ras association (RalGDS/AF-6) domain family (N-terminal) member 9          |
| GO cytosol                              | 59 | 1230 | 0.989 | 93100 nicotinate phosphoribosyltransferase domain containing 1                  |
| GO cytosol                              | 59 | 1230 | 0.989 | 9459 Rac/Cdc42 guanine nucleotide exchange factor (GEF) 6                       |
| GO acyltransferase activity             | 5  | 133  | 0.989 | 10162 lysophosphatidylcholine acyltransferase 3                                 |
| GO acyltransferase activity             | 5  | 133  | 0.989 | 154141 membrane bound O-acyltransferase domain containing 1                     |
| GO acyltransferase activity             | 5  | 133  | 0.989 | 54947 lysophosphatidylcholine acyltransferase 2                                 |
| GO acyltransferase activity             | 5  | 133  | 0.989 | 55140 elongation protein 3 homolog ( <i>S. cerevisiae</i> )                     |
| GO acyltransferase activity             | 5  | 133  | 0.989 | 55304 serine palmitoyltransferase, long chain base subunit 3                    |
| GO integral to endoplasmic reticulum me | 2  | 46   | 0.989 | 10170 dehydrogenase/reductase (SDR family) member 9                             |
| GO integral to endoplasmic reticulum me | 2  | 46   | 0.989 | 6238 ribosome binding protein 1 homolog 180kDa (dog)                            |
| GO cytoskeleton                         | 39 | 635  | 0.989 | 10205 myelin protein zero-like 2                                                |
| GO cytoskeleton                         | 39 | 635  | 0.989 | 10435 CDC42 effector protein (Rho GTPase binding) 2                             |
| GO cytoskeleton                         | 39 | 635  | 0.989 | 11043 midline 2                                                                 |

|                 |    |     |       |                                                                           |
|-----------------|----|-----|-------|---------------------------------------------------------------------------|
| GO cytoskeleton | 39 | 635 | 0.989 | 11155 LIM domain binding 3                                                |
| GO cytoskeleton | 39 | 635 | 0.989 | 134549 shroom family member 1                                             |
| GO cytoskeleton | 39 | 635 | 0.989 | 148170 CDC42 effector protein (Rho GTPase binding) 5                      |
| GO cytoskeleton | 39 | 635 | 0.989 | 152273 FYVE, RhoGEF and PH domain containing 5                            |
| GO cytoskeleton | 39 | 635 | 0.989 | 1540 cylindromatosis (turban tumor syndrome)                              |
| GO cytoskeleton | 39 | 635 | 0.989 | 1785 dynamin 2                                                            |
| GO cytoskeleton | 39 | 635 | 0.989 | 1821 dystrophin related protein 2                                         |
| GO cytoskeleton | 39 | 635 | 0.989 | 2040 stomatin                                                             |
| GO cytoskeleton | 39 | 635 | 0.989 | 23048 formin binding protein 1                                            |
| GO cytoskeleton | 39 | 635 | 0.989 | 23092 Rho GTPase activating protein 26                                    |
| GO cytoskeleton | 39 | 635 | 0.989 | 23095 kinesin family member 1B                                            |
| GO cytoskeleton | 39 | 635 | 0.989 | 23303 kinesin family member 13B                                           |
| GO cytoskeleton | 39 | 635 | 0.989 | 257019 FERM domain containing 3                                           |
| GO cytoskeleton | 39 | 635 | 0.989 | 28951 tribbles homolog 2 (Drosophila)                                     |
| GO cytoskeleton | 39 | 635 | 0.989 | 29116 myosin regulatory light chain interacting protein                   |
| GO cytoskeleton | 39 | 635 | 0.989 | 311 annexin A11                                                           |
| GO cytoskeleton | 39 | 635 | 0.989 | 345895 radial spoke head 4 homolog A (Chlamydomonas)                      |
| GO cytoskeleton | 39 | 635 | 0.989 | 4254 KIT ligand                                                           |
| GO cytoskeleton | 39 | 635 | 0.989 | 4842 nitric oxide synthase 1 (neuronal)                                   |
| GO cytoskeleton | 39 | 635 | 0.989 | 51168 myosin XVA                                                          |
| GO cytoskeleton | 39 | 635 | 0.989 | 5239 phosphoglucomutase 5                                                 |
| GO cytoskeleton | 39 | 635 | 0.989 | 54961 slingshot homolog 3 (Drosophila)                                    |
| GO cytoskeleton | 39 | 635 | 0.989 | 55200 pleckstrin homology domain containing, family G (with RhoGef domain |
| GO cytoskeleton | 39 | 635 | 0.989 | 55638 Golgi-localized protein                                             |
| GO cytoskeleton | 39 | 635 | 0.989 | 55740 enabled homolog (Drosophila)                                        |
| GO cytoskeleton | 39 | 635 | 0.989 | 55909 bridging integrator 3                                               |
| GO cytoskeleton | 39 | 635 | 0.989 | 56288 par-3 partitioning defective 3 homolog (C. elegans)                 |
| GO cytoskeleton | 39 | 635 | 0.989 | 57619 shroom family member 3                                              |
| GO cytoskeleton | 39 | 635 | 0.989 | 5774 protein tyrosine phosphatase, non-receptor type 3                    |
| GO cytoskeleton | 39 | 635 | 0.989 | 642273 family with sequence similarity 110, member C                      |
| GO cytoskeleton | 39 | 635 | 0.989 | 7170 tropomyosin 3                                                        |
| GO cytoskeleton | 39 | 635 | 0.989 | 85477 scinderin                                                           |
| GO cytoskeleton | 39 | 635 | 0.989 | 8556 CDC14 cell division cycle 14 homolog A (S. cerevisiae)               |
| GO cytoskeleton | 39 | 635 | 0.989 | 90362 family with sequence similarity 110, member B                       |
| GO cytoskeleton | 39 | 635 | 0.989 | 9050 proline-serine-threonine phosphatase interacting protein 2           |
| GO cytoskeleton | 39 | 635 | 0.989 | 9087 thymosin beta 4, Y-linked                                            |

|    |             |    |      |       |                                                                           |
|----|-------------|----|------|-------|---------------------------------------------------------------------------|
| GO | ATP binding | 87 | 1426 | 0.989 | 10221 tribbles homolog 1 (Drosophila)                                     |
| GO | ATP binding | 87 | 1426 | 0.989 | 10769 polo-like kinase 2 (Drosophila)                                     |
| GO | ATP binding | 87 | 1426 | 0.989 | 1080 cystic fibrosis transmembrane conductance regulator (ATP-binding cas |
| GO | ATP binding | 87 | 1426 | 0.989 | 112 adenylate cyclase 6                                                   |
| GO | ATP binding | 87 | 1426 | 0.989 | 11200 CHK2 checkpoint homolog (S. pombe)                                  |
| GO | ATP binding | 87 | 1426 | 0.989 | 11213 interleukin-1 receptor-associated kinase 3                          |
| GO | ATP binding | 87 | 1426 | 0.989 | 1152 creatine kinase, brain                                               |
| GO | ATP binding | 87 | 1426 | 0.989 | 127933 U2AF homology motif (UHM) kinase 1                                 |
| GO | ATP binding | 87 | 1426 | 0.989 | 130399 activin A receptor, type IC                                        |
| GO | ATP binding | 87 | 1426 | 0.989 | 134111 ubiquitin-conjugating enzyme E2Q family-like 1                     |
| GO | ATP binding | 87 | 1426 | 0.989 | 1373 carbamoyl-phosphate synthetase 1, mitochondrial                      |
| GO | ATP binding | 87 | 1426 | 0.989 | 140901 serine/threonine kinase 35                                         |
| GO | ATP binding | 87 | 1426 | 0.989 | 147945 NLR family, pyrin domain containing 4                              |
| GO | ATP binding | 87 | 1426 | 0.989 | 148229 ATPase, class I, type 8B, member 3                                 |
| GO | ATP binding | 87 | 1426 | 0.989 | 150094 salt-inducible kinase 1                                            |
| GO | ATP binding | 87 | 1426 | 0.989 | 1612 death-associated protein kinase 1                                    |
| GO | ATP binding | 87 | 1426 | 0.989 | 1969 EPH receptor A2                                                      |
| GO | ATP binding | 87 | 1426 | 0.989 | 197259 mixed lineage kinase domain-like                                   |
| GO | ATP binding | 87 | 1426 | 0.989 | 2044 EPH receptor A5                                                      |
| GO | ATP binding | 87 | 1426 | 0.989 | 205 adenylate kinase 3-like 1                                             |
| GO | ATP binding | 87 | 1426 | 0.989 | 2066 v-erb-a erythroblastic leukemia viral oncogene homolog 4 (avian)     |
| GO | ATP binding | 87 | 1426 | 0.989 | 2182 acyl-CoA synthetase long-chain family member 4                       |
| GO | ATP binding | 87 | 1426 | 0.989 | 2263 fibroblast growth factor receptor 2                                  |
| GO | ATP binding | 87 | 1426 | 0.989 | 23043 TRAF2 and NCK interacting kinase                                    |
| GO | ATP binding | 87 | 1426 | 0.989 | 23095 kinesin family member 1B                                            |
| GO | ATP binding | 87 | 1426 | 0.989 | 23303 kinesin family member 13B                                           |
| GO | ATP binding | 87 | 1426 | 0.989 | 23387 SIK family kinase 3                                                 |
| GO | ATP binding | 87 | 1426 | 0.989 | 23604 death-associated protein kinase 2                                   |
| GO | ATP binding | 87 | 1426 | 0.989 | 2752 glutamate-ammonia ligase (glutamine synthetase)                      |
| GO | ATP binding | 87 | 1426 | 0.989 | 284716 ribosomal modification protein rimK-like family member A           |
| GO | ATP binding | 87 | 1426 | 0.989 | 28951 tribbles homolog 2 (Drosophila)                                     |
| GO | ATP binding | 87 | 1426 | 0.989 | 28996 homeodomain interacting protein kinase 2                            |
| GO | ATP binding | 87 | 1426 | 0.989 | 3192 heterogeneous nuclear ribonucleoprotein U (scaffold attachment facto |
| GO | ATP binding | 87 | 1426 | 0.989 | 3306 heat shock 70kDa protein 2                                           |
| GO | ATP binding | 87 | 1426 | 0.989 | 343450 potassium channel, subfamily T, member 2                           |
| GO | ATP binding | 87 | 1426 | 0.989 | 3643 insulin receptor                                                     |

|    |             |    |      |       |                                                                                      |
|----|-------------|----|------|-------|--------------------------------------------------------------------------------------|
| GO | ATP binding | 87 | 1426 | 0.989 | 368 ATP-binding cassette, sub-family C (CFTR/MRP), member 6                          |
| GO | ATP binding | 87 | 1426 | 0.989 | 375449 microtubule associated serine/threonine kinase family member 4                |
| GO | ATP binding | 87 | 1426 | 0.989 | 3815 v-kit Hardy-Zuckerman 4 feline sarcoma viral oncogene homolog                   |
| GO | ATP binding | 87 | 1426 | 0.989 | 415116 pim-3 oncogene                                                                |
| GO | ATP binding | 87 | 1426 | 0.989 | 4293 mitogen-activated protein kinase kinase kinase 9                                |
| GO | ATP binding | 87 | 1426 | 0.989 | 4486 macrophage stimulating 1 receptor (c-met-related tyrosine kinase)               |
| GO | ATP binding | 87 | 1426 | 0.989 | 4638 myosin light chain kinase                                                       |
| GO | ATP binding | 87 | 1426 | 0.989 | 4645 myosin VB                                                                       |
| GO | ATP binding | 87 | 1426 | 0.989 | 4915 neurotrophic tyrosine kinase, receptor, type 2                                  |
| GO | ATP binding | 87 | 1426 | 0.989 | 493 ATPase, Ca <sup>++</sup> transporting, plasma membrane 4                         |
| GO | ATP binding | 87 | 1426 | 0.989 | 4939 2'-5'-oligoadenylate synthetase 2, 69/71kDa                                     |
| GO | ATP binding | 87 | 1426 | 0.989 | 498 ATP synthase, H <sup>+</sup> transporting, mitochondrial F1 complex, alpha subun |
| GO | ATP binding | 87 | 1426 | 0.989 | 5025 purinergic receptor P2X, ligand-gated ion channel, 4                            |
| GO | ATP binding | 87 | 1426 | 0.989 | 5063 p21 protein (Cdc42/Rac)-activated kinase 3                                      |
| GO | ATP binding | 87 | 1426 | 0.989 | 51168 myosin XVA                                                                     |
| GO | ATP binding | 87 | 1426 | 0.989 | 5129 cyclin-dependent kinase 18                                                      |
| GO | ATP binding | 87 | 1426 | 0.989 | 51314 thioredoxin domain containing 3 (spermatzoa)                                   |
| GO | ATP binding | 87 | 1426 | 0.989 | 51703 acyl-CoA synthetase long-chain family member 5                                 |
| GO | ATP binding | 87 | 1426 | 0.989 | 5218 cyclin-dependent kinase 14                                                      |
| GO | ATP binding | 87 | 1426 | 0.989 | 5243 ATP-binding cassette, sub-family B (MDR/TAP), member 1                          |
| GO | ATP binding | 87 | 1426 | 0.989 | 5244 ATP-binding cassette, sub-family B (MDR/TAP), member 4                          |
| GO | ATP binding | 87 | 1426 | 0.989 | 55601 DEAD (Asp-Glu-Ala-Asp) box polypeptide 60                                      |
| GO | ATP binding | 87 | 1426 | 0.989 | 5608 mitogen-activated protein kinase kinase 6                                       |
| GO | ATP binding | 87 | 1426 | 0.989 | 57118 calcium/calmodulin-dependent protein kinase ID                                 |
| GO | ATP binding | 87 | 1426 | 0.989 | 57147 SCY1-like 3 (S. cerevisiae)                                                    |
| GO | ATP binding | 87 | 1426 | 0.989 | 57494 ribosomal modification protein rimK-like family member B                       |
| GO | ATP binding | 87 | 1426 | 0.989 | 64127 nucleotide-binding oligomerization domain containing 2                         |
| GO | ATP binding | 87 | 1426 | 0.989 | 64135 interferon induced with helicase C domain 1                                    |
| GO | ATP binding | 87 | 1426 | 0.989 | 6446 serum/glucocorticoid regulated kinase 1                                         |
| GO | ATP binding | 87 | 1426 | 0.989 | 6850 spleen tyrosine kinase                                                          |
| GO | ATP binding | 87 | 1426 | 0.989 | 774 calcium channel, voltage-dependent, N type, alpha 1B subunit                     |
| GO | ATP binding | 87 | 1426 | 0.989 | 79132 DEXH (Asp-Glu-X-His) box polypeptide 58                                        |
| GO | ATP binding | 87 | 1426 | 0.989 | 79611 acyl-CoA synthetase short-chain family member 3                                |
| GO | ATP binding | 87 | 1426 | 0.989 | 79895 ATPase, class I, type 8B, member 4                                             |
| GO | ATP binding | 87 | 1426 | 0.989 | 81788 NUAK family, SNF1-like kinase, 2                                               |
| GO | ATP binding | 87 | 1426 | 0.989 | 8382 non-metastatic cells 5, protein expressed in (nucleoside-diphosphate k          |

|    |                                        |    |      |       |                                                                             |
|----|----------------------------------------|----|------|-------|-----------------------------------------------------------------------------|
| GO | ATP binding                            | 87 | 1426 | 0.989 | 83858 ATPase family, AAA domain containing 3B                               |
| GO | ATP binding                            | 87 | 1426 | 0.989 | 84033 obscurin, cytoskeletal calmodulin and titin-interacting RhoGEF        |
| GO | ATP binding                            | 87 | 1426 | 0.989 | 8527 diacylglycerol kinase, delta 130kDa                                    |
| GO | ATP binding                            | 87 | 1426 | 0.989 | 85441 peroxisomal proliferator-activated receptor A interacting complex 285 |
| GO | ATP binding                            | 87 | 1426 | 0.989 | 8653 DEAD (Asp-Glu-Ala-Asp) box polypeptide 3, Y-linked                     |
| GO | ATP binding                            | 87 | 1426 | 0.989 | 9060 3'-phosphoadenosine 5'-phosphosulfate synthase 2                       |
| GO | ATP binding                            | 87 | 1426 | 0.989 | 9064 mitogen-activated protein kinase kinase kinase 6                       |
| GO | ATP binding                            | 87 | 1426 | 0.989 | 91 activin A receptor, type IB                                              |
| GO | ATP binding                            | 87 | 1426 | 0.989 | 91461 protein kinase domain containing, cytoplasmic homolog (mouse)         |
| GO | ATP binding                            | 87 | 1426 | 0.989 | 91607 schlafen family member 11                                             |
| GO | ATP binding                            | 87 | 1426 | 0.989 | 9263 serine/threonine kinase 17a                                            |
| GO | ATP binding                            | 87 | 1426 | 0.989 | 94 activin A receptor type II-like 1                                        |
| GO | ATP binding                            | 87 | 1426 | 0.989 | 9445 integral membrane protein 2B                                           |
| GO | ATP binding                            | 87 | 1426 | 0.989 | 9619 ATP-binding cassette, sub-family G (WHITE), member 1                   |
| GO | ATP binding                            | 87 | 1426 | 0.989 | 9914 ATPase, Ca <sup>++</sup> transporting, type 2C, member 2               |
| GO | negative regulation of transcription f | 1  | 30   | 0.989 | 10221 tribbles homolog 1 (Drosophila)                                       |
| GO | protein kinase activity                | 7  | 170  | 0.989 | 10221 tribbles homolog 1 (Drosophila)                                       |
| GO | protein kinase activity                | 7  | 170  | 0.989 | 197259 mixed lineage kinase domain-like                                     |
| GO | protein kinase activity                | 7  | 170  | 0.989 | 28951 tribbles homolog 2 (Drosophila)                                       |
| GO | protein kinase activity                | 7  | 170  | 0.989 | 28996 homeodomain interacting protein kinase 2                              |
| GO | protein kinase activity                | 7  | 170  | 0.989 | 57147 SCY1-like 3 (S. cerevisiae)                                           |
| GO | protein kinase activity                | 7  | 170  | 0.989 | 6850 spleen tyrosine kinase                                                 |
| GO | protein kinase activity                | 7  | 170  | 0.989 | 91461 protein kinase domain containing, cytoplasmic homolog (mouse)         |
| GO | microtubule                            | 9  | 233  | 0.989 | 10253 sprouty homolog 2 (Drosophila)                                        |
| GO | microtubule                            | 9  | 233  | 0.989 | 11043 midline 2                                                             |
| GO | microtubule                            | 9  | 233  | 0.989 | 134549 shroom family member 1                                               |
| GO | microtubule                            | 9  | 233  | 0.989 | 1785 dynamin 2                                                              |
| GO | microtubule                            | 9  | 233  | 0.989 | 23095 kinesin family member 1B                                              |
| GO | microtubule                            | 9  | 233  | 0.989 | 23303 kinesin family member 13B                                             |
| GO | microtubule                            | 9  | 233  | 0.989 | 57619 shroom family member 3                                                |
| GO | microtubule                            | 9  | 233  | 0.989 | 642273 family with sequence similarity 110, member C                        |
| GO | microtubule                            | 9  | 233  | 0.989 | 83593 Ras association (RalGDS/AF-6) domain family member 5                  |
| GO | intracellular protein transport        | 2  | 174  | 0.989 | 10268 receptor (G protein-coupled) activity modifying protein 3             |
| GO | intracellular protein transport        | 2  | 174  | 0.989 | 55705 importin 9                                                            |
| GO | protein transporter activity           | 2  | 69   | 0.989 | 10268 receptor (G protein-coupled) activity modifying protein 3             |
| GO | protein transporter activity           | 2  | 69   | 0.989 | 55705 importin 9                                                            |



|                                           |    |     |       |                                                                               |
|-------------------------------------------|----|-----|-------|-------------------------------------------------------------------------------|
| GO protein transport                      | 25 | 388 | 0.989 | 10268 receptor (G protein-coupled) activity modifying protein 3               |
| GO protein transport                      | 25 | 388 | 0.989 | 10282 blocked early in transport 1 homolog ( <i>S. cerevisiae</i> )           |
| GO protein transport                      | 25 | 388 | 0.989 | 112574 sorting nexin 18                                                       |
| GO protein transport                      | 25 | 388 | 0.989 | 127845 golgi transport 1 homolog A ( <i>S. cerevisiae</i> )                   |
| GO protein transport                      | 25 | 388 | 0.989 | 1755 deleted in malignant brain tumors 1                                      |
| GO protein transport                      | 25 | 388 | 0.989 | 23682 RAB38, member RAS oncogene family                                       |
| GO protein transport                      | 25 | 388 | 0.989 | 25837 RAB26, member RAS oncogene family                                       |
| GO protein transport                      | 25 | 388 | 0.989 | 25956 SEC31 homolog B ( <i>S. cerevisiae</i> )                                |
| GO protein transport                      | 25 | 388 | 0.989 | 375056 melanoma inhibitory activity family, member 3                          |
| GO protein transport                      | 25 | 388 | 0.989 | 387923 stress-associated endoplasmic reticulum protein family member 2        |
| GO protein transport                      | 25 | 388 | 0.989 | 405753 dual oxidase maturation factor 2                                       |
| GO protein transport                      | 25 | 388 | 0.989 | 4645 myosin VB                                                                |
| GO protein transport                      | 25 | 388 | 0.989 | 51272 blocked early in transport 1 homolog ( <i>S. cerevisiae</i> )-like      |
| GO protein transport                      | 25 | 388 | 0.989 | 55275 vacuolar protein sorting 53 homolog ( <i>S. cerevisiae</i> )            |
| GO protein transport                      | 25 | 388 | 0.989 | 57132 chromatin modifying protein 1B                                          |
| GO protein transport                      | 25 | 388 | 0.989 | 57799 RAB40C, member RAS oncogene family                                      |
| GO protein transport                      | 25 | 388 | 0.989 | 5873 RAB27A, member RAS oncogene family                                       |
| GO protein transport                      | 25 | 388 | 0.989 | 6238 ribosome binding protein 1 homolog 180kDa (dog)                          |
| GO protein transport                      | 25 | 388 | 0.989 | 6564 solute carrier family 15 (oligopeptide transporter), member 1            |
| GO protein transport                      | 25 | 388 | 0.989 | 6565 solute carrier family 15 (H <sup>+</sup> /peptide transporter), member 2 |
| GO protein transport                      | 25 | 388 | 0.989 | 6812 syntaxin binding protein 1                                               |
| GO protein transport                      | 25 | 388 | 0.989 | 80223 RAB11 family interacting protein 1 (class I)                            |
| GO protein transport                      | 25 | 388 | 0.989 | 8527 diacylglycerol kinase, delta 130kDa                                      |
| GO protein transport                      | 25 | 388 | 0.989 | 89866 SEC16 homolog B ( <i>S. cerevisiae</i> )                                |
| GO protein transport                      | 25 | 388 | 0.989 | 91461 protein kinase domain containing, cytoplasmic homolog (mouse)           |
| GO ER to Golgi vesicle-mediated transport | 1  | 41  | 0.989 | 10282 blocked early in transport 1 homolog ( <i>S. cerevisiae</i> )           |
| GO vesicle-mediated transport             | 6  | 165 | 0.989 | 10282 blocked early in transport 1 homolog ( <i>S. cerevisiae</i> )           |
| GO vesicle-mediated transport             | 6  | 165 | 0.989 | 127845 golgi transport 1 homolog A ( <i>S. cerevisiae</i> )                   |
| GO vesicle-mediated transport             | 6  | 165 | 0.989 | 25956 SEC31 homolog B ( <i>S. cerevisiae</i> )                                |
| GO vesicle-mediated transport             | 6  | 165 | 0.989 | 6812 syntaxin binding protein 1                                               |
| GO vesicle-mediated transport             | 6  | 165 | 0.989 | 8673 vesicle-associated membrane protein 8 (endobrevin)                       |
| GO vesicle-mediated transport             | 6  | 165 | 0.989 | 89866 SEC16 homolog B ( <i>S. cerevisiae</i> )                                |
| GO membrane fraction                      | 31 | 472 | 0.989 | 10288 leukocyte immunoglobulin-like receptor, subfamily B (with TM and ITIM)  |
| GO membrane fraction                      | 31 | 472 | 0.989 | 10942 protease, serine, 21 (testisin)                                         |
| GO membrane fraction                      | 31 | 472 | 0.989 | 112 adenylate cyclase 6                                                       |
| GO membrane fraction                      | 31 | 472 | 0.989 | 154 adrenergic, beta-2-, receptor, surface                                    |

|                                      |    |      |       |                                                                                  |
|--------------------------------------|----|------|-------|----------------------------------------------------------------------------------|
| GO membrane fraction                 | 31 | 472  | 0.989 | 157506 retinol dehydrogenase 10 (all-trans)                                      |
| GO membrane fraction                 | 31 | 472  | 0.989 | 1803 dipeptidyl-peptidase 4                                                      |
| GO membrane fraction                 | 31 | 472  | 0.989 | 2525 fucosyltransferase 3 (galactoside 3(4)-L-fucosyltransferase, Lewis blood    |
| GO membrane fraction                 | 31 | 472  | 0.989 | 2526 fucosyltransferase 4 (alpha (1,3) fucosyltransferase, myeloid-specific)     |
| GO membrane fraction                 | 31 | 472  | 0.989 | 368 ATP-binding cassette, sub-family C (CFTR/MRP), member 6                      |
| GO membrane fraction                 | 31 | 472  | 0.989 | 3845 v-Ki-ras2 Kirsten rat sarcoma viral oncogene homolog                        |
| GO membrane fraction                 | 31 | 472  | 0.989 | 412 steroid sulfatase (microsomal), isozyme S                                    |
| GO membrane fraction                 | 31 | 472  | 0.989 | 4121 mannosidase, alpha, class 1A, member 1                                      |
| GO membrane fraction                 | 31 | 472  | 0.989 | 5243 ATP-binding cassette, sub-family B (MDR/TAP), member 1                      |
| GO membrane fraction                 | 31 | 472  | 0.989 | 5244 ATP-binding cassette, sub-family B (MDR/TAP), member 4                      |
| GO membrane fraction                 | 31 | 472  | 0.989 | 53947 alpha 1,4-galactosyltransferase                                            |
| GO membrane fraction                 | 31 | 472  | 0.989 | 5577 protein kinase, cAMP-dependent, regulatory, type II, beta                   |
| GO membrane fraction                 | 31 | 472  | 0.989 | 6004 regulator of G-protein signaling 16                                         |
| GO membrane fraction                 | 31 | 472  | 0.989 | 6505 solute carrier family 1 (neuronal/epithelial high affinity glutamate transp |
| GO membrane fraction                 | 31 | 472  | 0.989 | 6542 solute carrier family 7 (cationic amino acid transporter, gamma system), me |
| GO membrane fraction                 | 31 | 472  | 0.989 | 6564 solute carrier family 15 (oligopeptide transporter), member 1               |
| GO membrane fraction                 | 31 | 472  | 0.989 | 6565 solute carrier family 15 (H+/peptide transporter), member 2                 |
| GO membrane fraction                 | 31 | 472  | 0.989 | 6692 serine peptidase inhibitor, Kunitz type 1                                   |
| GO membrane fraction                 | 31 | 472  | 0.989 | 6751 somatostatin receptor 1                                                     |
| GO membrane fraction                 | 31 | 472  | 0.989 | 7133 tumor necrosis factor receptor superfamily, member 1B                       |
| GO membrane fraction                 | 31 | 472  | 0.989 | 8434 reversion-inducing-cysteine-rich protein with kazal motifs                  |
| GO membrane fraction                 | 31 | 472  | 0.989 | 8673 vesicle-associated membrane protein 8 (endobrevin)                          |
| GO membrane fraction                 | 31 | 472  | 0.989 | 8992 ATPase, H+ transporting, lysosomal 9kDa, V0 subunit e1                      |
| GO membrane fraction                 | 31 | 472  | 0.989 | 9050 proline-serine-threonine phosphatase interacting protein 2                  |
| GO membrane fraction                 | 31 | 472  | 0.989 | 9194 solute carrier family 16, member 7 (monocarboxylic acid transporter 2)      |
| GO membrane fraction                 | 31 | 472  | 0.989 | 952 CD38 molecule                                                                |
| GO membrane fraction                 | 31 | 472  | 0.989 | 9962 solute carrier family 23 (nucleobase transporters), member 2                |
| GO hydrogen ion transmembrane transp | 1  | 20   | 0.989 | 10312 T-cell, immune regulator 1, ATPase, H+ transporting, lysosomal V0 subu     |
| GO mitochondrion                     | 51 | 1193 | 0.989 | 10312 T-cell, immune regulator 1, ATPase, H+ transporting, lysosomal V0 subu     |
| GO mitochondrion                     | 51 | 1193 | 0.989 | 11067 chromosome 10 open reading frame 10                                        |
| GO mitochondrion                     | 51 | 1193 | 0.989 | 11074 tripartite motif-containing 31                                             |
| GO mitochondrion                     | 51 | 1193 | 0.989 | 11199 annexin A10                                                                |
| GO mitochondrion                     | 51 | 1193 | 0.989 | 11238 carbonic anhydrase VB, mitochondrial                                       |
| GO mitochondrion                     | 51 | 1193 | 0.989 | 112724 retinol dehydrogenase 13 (all-trans/9-cis)                                |
| GO mitochondrion                     | 51 | 1193 | 0.989 | 1152 creatine kinase, brain                                                      |
| GO mitochondrion                     | 51 | 1193 | 0.989 | 123096 solute carrier family 25, member 29                                       |

|    |               |    |      |       |                                                                                      |
|----|---------------|----|------|-------|--------------------------------------------------------------------------------------|
| GO | mitochondrion | 51 | 1193 | 0.989 | 1373 carbamoyl-phosphate synthetase 1, mitochondrial                                 |
| GO | mitochondrion | 51 | 1193 | 0.989 | 137994 leucine zipper-EF-hand containing transmembrane protein 2                     |
| GO | mitochondrion | 51 | 1193 | 0.989 | 1508 cathepsin B                                                                     |
| GO | mitochondrion | 51 | 1193 | 0.989 | 1571 cytochrome P450, family 2, subfamily E, polypeptide 1                           |
| GO | mitochondrion | 51 | 1193 | 0.989 | 205 adenylate kinase 3-like 1                                                        |
| GO | mitochondrion | 51 | 1193 | 0.989 | 2182 acyl-CoA synthetase long-chain family member 4                                  |
| GO | mitochondrion | 51 | 1193 | 0.989 | 22906 trafficking protein, kinesin binding 1                                         |
| GO | mitochondrion | 51 | 1193 | 0.989 | 23095 kinesin family member 1B                                                       |
| GO | mitochondrion | 51 | 1193 | 0.989 | 23151 GRAM domain containing 4                                                       |
| GO | mitochondrion | 51 | 1193 | 0.989 | 23263 MCF.2 cell line derived transforming sequence-like                             |
| GO | mitochondrion | 51 | 1193 | 0.989 | 2571 glutamate decarboxylase 1 (brain, 67kDa)                                        |
| GO | mitochondrion | 51 | 1193 | 0.989 | 27165 glutaminase 2 (liver, mitochondrial)                                           |
| GO | mitochondrion | 51 | 1193 | 0.989 | 2752 glutamate-ammonia ligase (glutamine synthetase)                                 |
| GO | mitochondrion | 51 | 1193 | 0.989 | 29103 DnaJ (Hsp40) homolog, subfamily C, member 15                                   |
| GO | mitochondrion | 51 | 1193 | 0.989 | 3306 heat shock 70kDa protein 2                                                      |
| GO | mitochondrion | 51 | 1193 | 0.989 | 3429 interferon, alpha-inducible protein 27                                          |
| GO | mitochondrion | 51 | 1193 | 0.989 | 35 acyl-Coenzyme A dehydrogenase, C-2 to C-3 short chain                             |
| GO | mitochondrion | 51 | 1193 | 0.989 | 3845 v-Ki-ras2 Kirsten rat sarcoma viral oncogene homolog                            |
| GO | mitochondrion | 51 | 1193 | 0.989 | 4128 monoamine oxidase A                                                             |
| GO | mitochondrion | 51 | 1193 | 0.989 | 4129 monoamine oxidase B                                                             |
| GO | mitochondrion | 51 | 1193 | 0.989 | 4170 myeloid cell leukemia sequence 1 (BCL2-related)                                 |
| GO | mitochondrion | 51 | 1193 | 0.989 | 4817 nitrilase 1                                                                     |
| GO | mitochondrion | 51 | 1193 | 0.989 | 4939 2'-5'-oligoadenylate synthetase 2, 69/71kDa                                     |
| GO | mitochondrion | 51 | 1193 | 0.989 | 498 ATP synthase, H <sup>+</sup> transporting, mitochondrial F1 complex, alpha subun |
| GO | mitochondrion | 51 | 1193 | 0.989 | 50865 heme binding protein 1                                                         |
| GO | mitochondrion | 51 | 1193 | 0.989 | 51703 acyl-CoA synthetase long-chain family member 5                                 |
| GO | mitochondrion | 51 | 1193 | 0.989 | 51754 transmembrane protein 8B                                                       |
| GO | mitochondrion | 51 | 1193 | 0.989 | 54739 XIAP associated factor 1                                                       |
| GO | mitochondrion | 51 | 1193 | 0.989 | 55268 enoyl Coenzyme A hydratase domain containing 2                                 |
| GO | mitochondrion | 51 | 1193 | 0.989 | 622 3-hydroxybutyrate dehydrogenase, type 1                                          |
| GO | mitochondrion | 51 | 1193 | 0.989 | 64064 3-oxoacid CoA transferase 2                                                    |
| GO | mitochondrion | 51 | 1193 | 0.989 | 64083 golgi phosphoprotein 3 (coat-protein)                                          |
| GO | mitochondrion | 51 | 1193 | 0.989 | 6812 syntaxin binding protein 1                                                      |
| GO | mitochondrion | 51 | 1193 | 0.989 | 682 basigin (Ok blood group)                                                         |
| GO | mitochondrion | 51 | 1193 | 0.989 | 7001 peroxiredoxin 2                                                                 |
| GO | mitochondrion | 51 | 1193 | 0.989 | 79611 acyl-CoA synthetase short-chain family member 3                                |

|                                |    |      |       |                                                                             |
|--------------------------------|----|------|-------|-----------------------------------------------------------------------------|
| GO mitochondrion               | 51 | 1193 | 0.989 | 79899 proline rich 5 like                                                   |
| GO mitochondrion               | 51 | 1193 | 0.989 | 83857 transmembrane and tetratricopeptide repeat containing 1               |
| GO mitochondrion               | 51 | 1193 | 0.989 | 84277 DnaJ (Hsp40) homolog, subfamily C, member 30                          |
| GO mitochondrion               | 51 | 1193 | 0.989 | 8673 vesicle-associated membrane protein 8 (endobrevin)                     |
| GO mitochondrion               | 51 | 1193 | 0.989 | 90362 family with sequence similarity 110, member B                         |
| GO mitochondrion               | 51 | 1193 | 0.989 | 9481 solute carrier family 25, member 27                                    |
| GO mitochondrion               | 51 | 1193 | 0.989 | 9804 translocase of outer mitochondrial membrane 20 homolog (yeast)         |
| GO Cajal body                  | 1  | 38   | 0.989 | 10346 tripartite motif-containing 22                                        |
| GO ligase activity             | 16 | 303  | 0.989 | 10346 tripartite motif-containing 22                                        |
| GO ligase activity             | 16 | 303  | 0.989 | 11074 tripartite motif-containing 31                                        |
| GO ligase activity             | 16 | 303  | 0.989 | 134111 ubiquitin-conjugating enzyme E2Q family-like 1                       |
| GO ligase activity             | 16 | 303  | 0.989 | 1373 carbamoyl-phosphate synthetase 1, mitochondrial                        |
| GO ligase activity             | 16 | 303  | 0.989 | 151636 deltex 3-like (Drosophila)                                           |
| GO ligase activity             | 16 | 303  | 0.989 | 154214 ring finger protein 217                                              |
| GO ligase activity             | 16 | 303  | 0.989 | 2182 acyl-CoA synthetase long-chain family member 4                         |
| GO ligase activity             | 16 | 303  | 0.989 | 255488 ring finger protein 144B                                             |
| GO ligase activity             | 16 | 303  | 0.989 | 2752 glutamate-ammonia ligase (glutamine synthetase)                        |
| GO ligase activity             | 16 | 303  | 0.989 | 29116 myosin regulatory light chain interacting protein                     |
| GO ligase activity             | 16 | 303  | 0.989 | 5071 Parkinson disease (autosomal recessive, juvenile) 2, parkin            |
| GO ligase activity             | 16 | 303  | 0.989 | 51703 acyl-CoA synthetase long-chain family member 5                        |
| GO ligase activity             | 16 | 303  | 0.989 | 54894 ring finger protein 43                                                |
| GO ligase activity             | 16 | 303  | 0.989 | 7706 tripartite motif-containing 25                                         |
| GO ligase activity             | 16 | 303  | 0.989 | 79611 acyl-CoA synthetase short-chain family member 3                       |
| GO ligase activity             | 16 | 303  | 0.989 | 79872 Cas-Br-M (murine) ecotropic retroviral transforming sequence-like 1   |
| GO nuclear speck               | 4  | 111  | 0.989 | 10346 tripartite motif-containing 22                                        |
| GO nuclear speck               | 4  | 111  | 0.989 | 2122 MDS1 and EVI1 complex locus                                            |
| GO nuclear speck               | 4  | 111  | 0.989 | 57018 cyclin L1                                                             |
| GO nuclear speck               | 4  | 111  | 0.989 | 6239 ras responsive element binding protein 1                               |
| GO double-stranded RNA binding | 2  | 31   | 0.989 | 104 adenosine deaminase, RNA-specific, B1 (RED1 homolog rat)                |
| GO double-stranded RNA binding | 2  | 31   | 0.989 | 7098 toll-like receptor 3                                                   |
| GO mRNA processing             | 5  | 231  | 0.989 | 104 adenosine deaminase, RNA-specific, B1 (RED1 homolog rat)                |
| GO mRNA processing             | 5  | 231  | 0.989 | 10891 peroxisome proliferator-activated receptor gamma, coactivator 1 alpha |
| GO mRNA processing             | 5  | 231  | 0.989 | 3192 heterogeneous nuclear ribonucleoprotein U (scaffold attachment facto   |
| GO mRNA processing             | 5  | 231  | 0.989 | 57379 activation-induced cytidine deaminase                                 |
| GO mRNA processing             | 5  | 231  | 0.989 | 8996 nucleolar protein 3 (apoptosis repressor with CARD domain)             |
| GO nucleolus                   | 41 | 692  | 0.989 | 104 adenosine deaminase, RNA-specific, B1 (RED1 homolog rat)                |

|              |    |     |       |                                                                               |
|--------------|----|-----|-------|-------------------------------------------------------------------------------|
| GO nucleolus | 41 | 692 | 0.989 | 10838 zinc finger protein 275                                                 |
| GO nucleolus | 41 | 692 | 0.989 | 116113 forkhead box P4                                                        |
| GO nucleolus | 41 | 692 | 0.989 | 140901 serine/threonine kinase 35                                             |
| GO nucleolus | 41 | 692 | 0.989 | 2033 E1A binding protein p300                                                 |
| GO nucleolus | 41 | 692 | 0.989 | 219539 yippee-like 4 (Drosophila)                                             |
| GO nucleolus | 41 | 692 | 0.989 | 23043 TRAF2 and NCK interacting kinase                                        |
| GO nucleolus | 41 | 692 | 0.989 | 23099 zinc finger and BTB domain containing 43                                |
| GO nucleolus | 41 | 692 | 0.989 | 23476 bromodomain containing 4                                                |
| GO nucleolus | 41 | 692 | 0.989 | 2353 FBJ murine osteosarcoma viral oncogene homolog                           |
| GO nucleolus | 41 | 692 | 0.989 | 2521 fused in sarcoma                                                         |
| GO nucleolus | 41 | 692 | 0.989 | 25946 zinc finger protein 385A                                                |
| GO nucleolus | 41 | 692 | 0.989 | 2624 GATA binding protein 2                                                   |
| GO nucleolus | 41 | 692 | 0.989 | 27295 PDZ and LIM domain 3                                                    |
| GO nucleolus | 41 | 692 | 0.989 | 3142 H2.0-like homeobox                                                       |
| GO nucleolus | 41 | 692 | 0.989 | 3428 interferon, gamma-inducible protein 16                                   |
| GO nucleolus | 41 | 692 | 0.989 | 3726 jun B proto-oncogene                                                     |
| GO nucleolus | 41 | 692 | 0.989 | 379 ADP-ribosylation factor-like 4D                                           |
| GO nucleolus | 41 | 692 | 0.989 | 387496 RAS-like, family 11, member A                                          |
| GO nucleolus | 41 | 692 | 0.989 | 4209 myocyte enhancer factor 2D                                               |
| GO nucleolus | 41 | 692 | 0.989 | 4212 Meis homeobox 2                                                          |
| GO nucleolus | 41 | 692 | 0.989 | 467 activating transcription factor 3                                         |
| GO nucleolus | 41 | 692 | 0.989 | 4778 nuclear factor (erythroid-derived 2), 45kDa                              |
| GO nucleolus | 41 | 692 | 0.989 | 4794 nuclear factor of kappa light polypeptide gene enhancer in B-cells inhib |
| GO nucleolus | 41 | 692 | 0.989 | 5307 paired-like homeodomain 1                                                |
| GO nucleolus | 41 | 692 | 0.989 | 5371 promyelocytic leukemia                                                   |
| GO nucleolus | 41 | 692 | 0.989 | 55140 elongation protein 3 homolog (S. cerevisiae)                            |
| GO nucleolus | 41 | 692 | 0.989 | 55762 zinc finger protein 701                                                 |
| GO nucleolus | 41 | 692 | 0.989 | 57459 GATA zinc finger domain containing 2B                                   |
| GO nucleolus | 41 | 692 | 0.989 | 604 B-cell CLL/lymphoma 6                                                     |
| GO nucleolus | 41 | 692 | 0.989 | 6778 signal transducer and activator of transcription 6, interleukin-4 induc  |
| GO nucleolus | 41 | 692 | 0.989 | 7404 ubiquitously transcribed tetratricopeptide repeat gene, Y-linked         |
| GO nucleolus | 41 | 692 | 0.989 | 7706 tripartite motif-containing 25                                           |
| GO nucleolus | 41 | 692 | 0.989 | 80763 chromosome 12 open reading frame 39                                     |
| GO nucleolus | 41 | 692 | 0.989 | 83719 yippee-like 3 (Drosophila)                                              |
| GO nucleolus | 41 | 692 | 0.989 | 84875 poly (ADP-ribose) polymerase family, member 10                          |
| GO nucleolus | 41 | 692 | 0.989 | 8996 nucleolar protein 3 (apoptosis repressor with CARD domain)               |

|    |                |    |     |       |                                                                                 |
|----|----------------|----|-----|-------|---------------------------------------------------------------------------------|
| GO | nucleolus      | 41 | 692 | 0.989 | 91748 chromosome 14 open reading frame 43                                       |
| GO | nucleolus      | 41 | 692 | 0.989 | 9314 Kruppel-like factor 4 (gut)                                                |
| GO | nucleolus      | 41 | 692 | 0.989 | 9875 URB1 ribosome biogenesis 1 homolog ( <i>S. cerevisiae</i> )                |
| GO | nucleolus      | 41 | 692 | 0.989 | 9904 RNA binding motif protein 19                                               |
| GO | nucleoplasm    | 12 | 455 | 0.989 | 104 adenosine deaminase, RNA-specific, B1 (RED1 homolog rat)                    |
| GO | nucleoplasm    | 12 | 455 | 0.989 | 311 annexin A11                                                                 |
| GO | nucleoplasm    | 12 | 455 | 0.989 | 3164 nuclear receptor subfamily 4, group A, member 1                            |
| GO | nucleoplasm    | 12 | 455 | 0.989 | 3428 interferon, gamma-inducible protein 16                                     |
| GO | nucleoplasm    | 12 | 455 | 0.989 | 3665 interferon regulatory factor 7                                             |
| GO | nucleoplasm    | 12 | 455 | 0.989 | 3725 jun oncogene                                                               |
| GO | nucleoplasm    | 12 | 455 | 0.989 | 4087 SMAD family member 2                                                       |
| GO | nucleoplasm    | 12 | 455 | 0.989 | 4170 myeloid cell leukemia sequence 1 (BCL2-related)                            |
| GO | nucleoplasm    | 12 | 455 | 0.989 | 5371 promyelocytic leukemia                                                     |
| GO | nucleoplasm    | 12 | 455 | 0.989 | 6604 SWI/SNF related, matrix associated, actin dependent regulator of chromatin |
| GO | nucleoplasm    | 12 | 455 | 0.989 | 6921 transcription elongation factor B (SIII), polypeptide 1 (15kDa, elongin C) |
| GO | nucleoplasm    | 12 | 455 | 0.989 | 9904 RNA binding motif protein 19                                               |
| GO | RNA binding    | 17 | 562 | 0.989 | 104 adenosine deaminase, RNA-specific, B1 (RED1 homolog rat)                    |
| GO | RNA binding    | 17 | 562 | 0.989 | 10891 peroxisome proliferator-activated receptor gamma, coactivator 1 alpha     |
| GO | RNA binding    | 17 | 562 | 0.989 | 11030 RNA binding protein with multiple splicing                                |
| GO | RNA binding    | 17 | 562 | 0.989 | 127933 U2AF homology motif (UHM) kinase 1                                       |
| GO | RNA binding    | 17 | 562 | 0.989 | 2521 fused in sarcoma                                                           |
| GO | RNA binding    | 17 | 562 | 0.989 | 3192 heterogeneous nuclear ribonucleoprotein U (scaffold attachment factor)     |
| GO | RNA binding    | 17 | 562 | 0.989 | 48 aconitase 1, soluble                                                         |
| GO | RNA binding    | 17 | 562 | 0.989 | 4939 2'-5'-oligoadenylate synthetase 2, 69/71kDa                                |
| GO | RNA binding    | 17 | 562 | 0.989 | 55601 DEAD (Asp-Glu-Ala-Asp) box polypeptide 60                                 |
| GO | RNA binding    | 17 | 562 | 0.989 | 64135 interferon induced with helicase C domain 1                               |
| GO | RNA binding    | 17 | 562 | 0.989 | 79132 DEXH (Asp-Glu-X-His) box polypeptide 58                                   |
| GO | RNA binding    | 17 | 562 | 0.989 | 80315 cytoplasmic polyadenylation element binding protein 4                     |
| GO | RNA binding    | 17 | 562 | 0.989 | 85441 peroxisomal proliferator-activated receptor A interacting complex 285     |
| GO | RNA binding    | 17 | 562 | 0.989 | 8635 ribonuclease T2                                                            |
| GO | RNA binding    | 17 | 562 | 0.989 | 8653 DEAD (Asp-Glu-Ala-Asp) box polypeptide 3, Y-linked                         |
| GO | RNA binding    | 17 | 562 | 0.989 | 8996 nucleolar protein 3 (apoptosis repressor with CARD domain)                 |
| GO | RNA binding    | 17 | 562 | 0.989 | 9904 RNA binding motif protein 19                                               |
| GO | RNA processing | 3  | 80  | 0.989 | 104 adenosine deaminase, RNA-specific, B1 (RED1 homolog rat)                    |
| GO | RNA processing | 3  | 80  | 0.989 | 11030 RNA binding protein with multiple splicing                                |
| GO | RNA processing | 3  | 80  | 0.989 | 3192 heterogeneous nuclear ribonucleoprotein U (scaffold attachment factor)     |

|                                |    |     |       |                                                                          |
|--------------------------------|----|-----|-------|--------------------------------------------------------------------------|
| GO axon guidance               | 4  | 71  | 0.989 | 10417 spondin 2, extracellular matrix protein                            |
| GO axon guidance               | 4  | 71  | 0.989 | 2737 GLI family zinc finger 3                                            |
| GO axon guidance               | 4  | 71  | 0.989 | 627 brain-derived neurotrophic factor                                    |
| GO axon guidance               | 4  | 71  | 0.989 | 7869 sema domain, immunoglobulin domain (Ig), short basic domain, secret |
| GO endoplasmic reticulum lumen | 3  | 68  | 0.989 | 10439 olfactomedin 1                                                     |
| GO endoplasmic reticulum lumen | 3  | 68  | 0.989 | 121506 endoplasmic reticulum protein 27                                  |
| GO endoplasmic reticulum lumen | 3  | 68  | 0.989 | 9563 hexose-6-phosphate dehydrogenase (glucose 1-dehydrogenase)          |
| GO biological_process          | 36 | 547 | 0.989 | 10447 family with sequence similarity 3, member C                        |
| GO biological_process          | 36 | 547 | 0.989 | 11043 midline 2                                                          |
| GO biological_process          | 36 | 547 | 0.989 | 11273 ataxin 2-like                                                      |
| GO biological_process          | 36 | 547 | 0.989 | 116844 leucine-rich alpha-2-glycoprotein 1                               |
| GO biological_process          | 36 | 547 | 0.989 | 117157 SH2 domain containing 1B                                          |
| GO biological_process          | 36 | 547 | 0.989 | 125476 INO80 complex subunit C                                           |
| GO biological_process          | 36 | 547 | 0.989 | 1953 multiple EGF-like-domains 6                                         |
| GO biological_process          | 36 | 547 | 0.989 | 202 absent in melanoma 1                                                 |
| GO biological_process          | 36 | 547 | 0.989 | 2117 ets variant 3                                                       |
| GO biological_process          | 36 | 547 | 0.989 | 22807 IKAROS family zinc finger 2 (Helios)                               |
| GO biological_process          | 36 | 547 | 0.989 | 23348 dedicator of cytokinesis 9                                         |
| GO biological_process          | 36 | 547 | 0.989 | 23767 fibronectin leucine rich transmembrane protein 3                   |
| GO biological_process          | 36 | 547 | 0.989 | 25837 RAB26, member RAS oncogene family                                  |
| GO biological_process          | 36 | 547 | 0.989 | 26053 autism susceptibility candidate 2                                  |
| GO biological_process          | 36 | 547 | 0.989 | 266675 bestrophin 4                                                      |
| GO biological_process          | 36 | 547 | 0.989 | 26998 fetuin B                                                           |
| GO biological_process          | 36 | 547 | 0.989 | 27202 G protein-coupled receptor 77                                      |
| GO biological_process          | 36 | 547 | 0.989 | 3268 ArfGAP with FG repeats 2                                            |
| GO biological_process          | 36 | 547 | 0.989 | 3437 interferon-induced protein with tetratricopeptide repeats 3         |
| GO biological_process          | 36 | 547 | 0.989 | 345275 hydroxysteroid (17-beta) dehydrogenase 13                         |
| GO biological_process          | 36 | 547 | 0.989 | 376940 zinc finger CCCH-type containing 6                                |
| GO biological_process          | 36 | 547 | 0.989 | 4007 prickle homolog 3 (Drosophila)                                      |
| GO biological_process          | 36 | 547 | 0.989 | 4038 low density lipoprotein receptor-related protein 4                  |
| GO biological_process          | 36 | 547 | 0.989 | 4246 secretoglobin, family 2A, member 1                                  |
| GO biological_process          | 36 | 547 | 0.989 | 4817 nitrilase 1                                                         |
| GO biological_process          | 36 | 547 | 0.989 | 5239 phosphoglucomutase 5                                                |
| GO biological_process          | 36 | 547 | 0.989 | 5304 prolactin-induced protein                                           |
| GO biological_process          | 36 | 547 | 0.989 | 54436 SH3 domain and tetratricopeptide repeats 1                         |
| GO biological_process          | 36 | 547 | 0.989 | 54664 transmembrane protein 106B                                         |

|                                  |    |     |       |                                                                             |
|----------------------------------|----|-----|-------|-----------------------------------------------------------------------------|
| GO biological_process            | 36 | 547 | 0.989 | 57464 family with sequence similarity 40, member B                          |
| GO biological_process            | 36 | 547 | 0.989 | 57535 KIAA1324                                                              |
| GO biological_process            | 36 | 547 | 0.989 | 8013 nuclear receptor subfamily 4, group A, member 3                        |
| GO biological_process            | 36 | 547 | 0.989 | 81603 tripartite motif-containing 8                                         |
| GO biological_process            | 36 | 547 | 0.989 | 8418 cytidine monophosphate-N-acetylneuraminic acid hydroxylase (CMP-N      |
| GO biological_process            | 36 | 547 | 0.989 | 9324 high mobility group nucleosomal binding domain 3                       |
| GO biological_process            | 36 | 547 | 0.989 | 9875 URB1 ribosome biogenesis 1 homolog ( <i>S. cerevisiae</i> )            |
| GO sodium ion transport          | 7  | 129 | 0.989 | 10568 solute carrier family 34 (sodium phosphate), member 2                 |
| GO sodium ion transport          | 7  | 129 | 0.989 | 259232 sodium leak channel, non-selective                                   |
| GO sodium ion transport          | 7  | 129 | 0.989 | 6330 sodium channel, voltage-gated, type IV, beta                           |
| GO sodium ion transport          | 7  | 129 | 0.989 | 6446 serum/glucocorticoid regulated kinase 1                                |
| GO sodium ion transport          | 7  | 129 | 0.989 | 6535 solute carrier family 6 (neurotransmitter transporter, creatine), memb |
| GO sodium ion transport          | 7  | 129 | 0.989 | 8671 solute carrier family 4, sodium bicarbonate cotransporter, member 4    |
| GO sodium ion transport          | 7  | 129 | 0.989 | 9962 solute carrier family 23 (nucleobase transporters), member 2           |
| GO cell cycle                    | 19 | 458 | 0.989 | 10628 thioredoxin interacting protein                                       |
| GO cell cycle                    | 19 | 458 | 0.989 | 11200 CHK2 checkpoint homolog ( <i>S. pombe</i> )                           |
| GO cell cycle                    | 19 | 458 | 0.989 | 150094 salt-inducible kinase 1                                              |
| GO cell cycle                    | 19 | 458 | 0.989 | 1540 cylindromatosis (turban tumor syndrome)                                |
| GO cell cycle                    | 19 | 458 | 0.989 | 1843 dual specificity phosphatase 1                                         |
| GO cell cycle                    | 19 | 458 | 0.989 | 2033 E1A binding protein p300                                               |
| GO cell cycle                    | 19 | 458 | 0.989 | 311 annexin A11                                                             |
| GO cell cycle                    | 19 | 458 | 0.989 | 3993 lethal giant larvae homolog 2 ( <i>Drosophila</i> )                    |
| GO cell cycle                    | 19 | 458 | 0.989 | 415116 pim-3 oncogene                                                       |
| GO cell cycle                    | 19 | 458 | 0.989 | 50486 G0/G1switch 2                                                         |
| GO cell cycle                    | 19 | 458 | 0.989 | 5218 cyclin-dependent kinase 14                                             |
| GO cell cycle                    | 19 | 458 | 0.989 | 55909 bridging integrator 3                                                 |
| GO cell cycle                    | 19 | 458 | 0.989 | 56288 par-3 partitioning defective 3 homolog ( <i>C. elegans</i> )          |
| GO cell cycle                    | 19 | 458 | 0.989 | 5655 kallikrein-related peptidase 10                                        |
| GO cell cycle                    | 19 | 458 | 0.989 | 57132 chromatin modifying protein 1B                                        |
| GO cell cycle                    | 19 | 458 | 0.989 | 60370 arginine vasopressin-induced 1                                        |
| GO cell cycle                    | 19 | 458 | 0.989 | 83937 Ras association (RalGDS/AF-6) domain family member 4                  |
| GO cell cycle                    | 19 | 458 | 0.989 | 8556 CDC14 cell division cycle 14 homolog A ( <i>S. cerevisiae</i> )        |
| GO cell cycle                    | 19 | 458 | 0.989 | 8900 cyclin A1                                                              |
| GO female gamete generation      | 1  | 15  | 0.989 | 10766 transducer of ERBB2, 2                                                |
| GO regulation of gene expression | 2  | 32  | 0.989 | 10766 transducer of ERBB2, 2                                                |
| GO regulation of gene expression | 2  | 32  | 0.989 | 5460 POU class 5 homeobox 1                                                 |



|    |                    |     |      |       |                                                                             |
|----|--------------------|-----|------|-------|-----------------------------------------------------------------------------|
| GO | nucleotide binding | 110 | 1859 | 0.989 | 10769 polo-like kinase 2 (Drosophila)                                       |
| GO | nucleotide binding | 110 | 1859 | 0.989 | 1080 cystic fibrosis transmembrane conductance regulator (ATP-binding cas:  |
| GO | nucleotide binding | 110 | 1859 | 0.989 | 10891 peroxisome proliferator-activated receptor gamma, coactivator 1 alpha |
| GO | nucleotide binding | 110 | 1859 | 0.989 | 11030 RNA binding protein with multiple splicing                            |
| GO | nucleotide binding | 110 | 1859 | 0.989 | 112 adenylate cyclase 6                                                     |
| GO | nucleotide binding | 110 | 1859 | 0.989 | 11200 CHK2 checkpoint homolog (S. pombe)                                    |
| GO | nucleotide binding | 110 | 1859 | 0.989 | 11213 interleukin-1 receptor-associated kinase 3                            |
| GO | nucleotide binding | 110 | 1859 | 0.989 | 1152 creatine kinase, brain                                                 |
| GO | nucleotide binding | 110 | 1859 | 0.989 | 115273 RAB42, member RAS oncogene family                                    |
| GO | nucleotide binding | 110 | 1859 | 0.989 | 127933 U2AF homology motif (UHM) kinase 1                                   |
| GO | nucleotide binding | 110 | 1859 | 0.989 | 130399 activin A receptor, type IC                                          |
| GO | nucleotide binding | 110 | 1859 | 0.989 | 134111 ubiquitin-conjugating enzyme E2Q family-like 1                       |
| GO | nucleotide binding | 110 | 1859 | 0.989 | 1373 carbamoyl-phosphate synthetase 1, mitochondrial                        |
| GO | nucleotide binding | 110 | 1859 | 0.989 | 140901 serine/threonine kinase 35                                           |
| GO | nucleotide binding | 110 | 1859 | 0.989 | 147945 NLR family, pyrin domain containing 4                                |
| GO | nucleotide binding | 110 | 1859 | 0.989 | 148229 ATPase, class I, type 8B, member 3                                   |
| GO | nucleotide binding | 110 | 1859 | 0.989 | 150094 salt-inducible kinase 1                                              |
| GO | nucleotide binding | 110 | 1859 | 0.989 | 1612 death-associated protein kinase 1                                      |
| GO | nucleotide binding | 110 | 1859 | 0.989 | 1785 dynamin 2                                                              |
| GO | nucleotide binding | 110 | 1859 | 0.989 | 1915 eukaryotic translation elongation factor 1 alpha 1                     |
| GO | nucleotide binding | 110 | 1859 | 0.989 | 1969 EPH receptor A2                                                        |
| GO | nucleotide binding | 110 | 1859 | 0.989 | 1983 eukaryotic translation initiation factor 5                             |
| GO | nucleotide binding | 110 | 1859 | 0.989 | 2044 EPH receptor A5                                                        |
| GO | nucleotide binding | 110 | 1859 | 0.989 | 205 adenylate kinase 3-like 1                                               |
| GO | nucleotide binding | 110 | 1859 | 0.989 | 2066 v-erb-a erythroblastic leukemia viral oncogene homolog 4 (avian)       |
| GO | nucleotide binding | 110 | 1859 | 0.989 | 2182 acyl-CoA synthetase long-chain family member 4                         |
| GO | nucleotide binding | 110 | 1859 | 0.989 | 2263 fibroblast growth factor receptor 2                                    |
| GO | nucleotide binding | 110 | 1859 | 0.989 | 23043 TRAF2 and NCK interacting kinase                                      |
| GO | nucleotide binding | 110 | 1859 | 0.989 | 23095 kinesin family member 1B                                              |
| GO | nucleotide binding | 110 | 1859 | 0.989 | 23303 kinesin family member 13B                                             |
| GO | nucleotide binding | 110 | 1859 | 0.989 | 23387 SIK family kinase 3                                                   |
| GO | nucleotide binding | 110 | 1859 | 0.989 | 23604 death-associated protein kinase 2                                     |
| GO | nucleotide binding | 110 | 1859 | 0.989 | 23682 RAB38, member RAS oncogene family                                     |
| GO | nucleotide binding | 110 | 1859 | 0.989 | 25837 RAB26, member RAS oncogene family                                     |
| GO | nucleotide binding | 110 | 1859 | 0.989 | 26157 GTPase, IMAP family member 2                                          |
| GO | nucleotide binding | 110 | 1859 | 0.989 | 2633 guanylate binding protein 1, interferon-inducible, 67kDa               |

|    |                    |     |      |       |                                                                                      |
|----|--------------------|-----|------|-------|--------------------------------------------------------------------------------------|
| GO | nucleotide binding | 110 | 1859 | 0.989 | 2634 guanylate binding protein 2, interferon-inducible                               |
| GO | nucleotide binding | 110 | 1859 | 0.989 | 2635 guanylate binding protein 3                                                     |
| GO | nucleotide binding | 110 | 1859 | 0.989 | 2752 glutamate-ammonia ligase (glutamine synthetase)                                 |
| GO | nucleotide binding | 110 | 1859 | 0.989 | 2769 guanine nucleotide binding protein (G protein), alpha 15 (Gq class)             |
| GO | nucleotide binding | 110 | 1859 | 0.989 | 284716 ribosomal modification protein rimK-like family member A                      |
| GO | nucleotide binding | 110 | 1859 | 0.989 | 28951 tribbles homolog 2 (Drosophila)                                                |
| GO | nucleotide binding | 110 | 1859 | 0.989 | 28996 homeodomain interacting protein kinase 2                                       |
| GO | nucleotide binding | 110 | 1859 | 0.989 | 3192 heterogeneous nuclear ribonucleoprotein U (scaffold attachment facto            |
| GO | nucleotide binding | 110 | 1859 | 0.989 | 3306 heat shock 70kDa protein 2                                                      |
| GO | nucleotide binding | 110 | 1859 | 0.989 | 343450 potassium channel, subfamily T, member 2                                      |
| GO | nucleotide binding | 110 | 1859 | 0.989 | 3643 insulin receptor                                                                |
| GO | nucleotide binding | 110 | 1859 | 0.989 | 368 ATP-binding cassette, sub-family C (CFTR/MRP), member 6                          |
| GO | nucleotide binding | 110 | 1859 | 0.989 | 375449 microtubule associated serine/threonine kinase family member 4                |
| GO | nucleotide binding | 110 | 1859 | 0.989 | 379 ADP-ribosylation factor-like 4D                                                  |
| GO | nucleotide binding | 110 | 1859 | 0.989 | 3815 v-kit Hardy-Zuckerman 4 feline sarcoma viral oncogene homolog                   |
| GO | nucleotide binding | 110 | 1859 | 0.989 | 3845 v-Ki-ras2 Kirsten rat sarcoma viral oncogene homolog                            |
| GO | nucleotide binding | 110 | 1859 | 0.989 | 387496 RAS-like, family 11, member A                                                 |
| GO | nucleotide binding | 110 | 1859 | 0.989 | 392509 ADP-ribosylation factor-like 13A                                              |
| GO | nucleotide binding | 110 | 1859 | 0.989 | 415116 pim-3 oncogene                                                                |
| GO | nucleotide binding | 110 | 1859 | 0.989 | 4293 mitogen-activated protein kinase kinase kinase 9                                |
| GO | nucleotide binding | 110 | 1859 | 0.989 | 4486 macrophage stimulating 1 receptor (c-met-related tyrosine kinase)               |
| GO | nucleotide binding | 110 | 1859 | 0.989 | 4599 myxovirus (influenza virus) resistance 1, interferon-inducible protein p        |
| GO | nucleotide binding | 110 | 1859 | 0.989 | 4600 myxovirus (influenza virus) resistance 2 (mouse)                                |
| GO | nucleotide binding | 110 | 1859 | 0.989 | 4638 myosin light chain kinase                                                       |
| GO | nucleotide binding | 110 | 1859 | 0.989 | 4645 myosin VB                                                                       |
| GO | nucleotide binding | 110 | 1859 | 0.989 | 4915 neurotrophic tyrosine kinase, receptor, type 2                                  |
| GO | nucleotide binding | 110 | 1859 | 0.989 | 493 ATPase, Ca <sup>++</sup> transporting, plasma membrane 4                         |
| GO | nucleotide binding | 110 | 1859 | 0.989 | 4939 2'-5'-oligoadenylate synthetase 2, 69/71kDa                                     |
| GO | nucleotide binding | 110 | 1859 | 0.989 | 498 ATP synthase, H <sup>+</sup> transporting, mitochondrial F1 complex, alpha subun |
| GO | nucleotide binding | 110 | 1859 | 0.989 | 5063 p21 protein (Cdc42/Rac)-activated kinase 3                                      |
| GO | nucleotide binding | 110 | 1859 | 0.989 | 51168 myosin XVA                                                                     |
| GO | nucleotide binding | 110 | 1859 | 0.989 | 51285 RAS-like, family 12                                                            |
| GO | nucleotide binding | 110 | 1859 | 0.989 | 5129 cyclin-dependent kinase 18                                                      |
| GO | nucleotide binding | 110 | 1859 | 0.989 | 51655 RAS, dexamethasone-induced 1                                                   |
| GO | nucleotide binding | 110 | 1859 | 0.989 | 51703 acyl-CoA synthetase long-chain family member 5                                 |
| GO | nucleotide binding | 110 | 1859 | 0.989 | 5218 cyclin-dependent kinase 14                                                      |

|    |                    |     |      |       |                                                                             |
|----|--------------------|-----|------|-------|-----------------------------------------------------------------------------|
| GO | nucleotide binding | 110 | 1859 | 0.989 | 5243 ATP-binding cassette, sub-family B (MDR/TAP), member 1                 |
| GO | nucleotide binding | 110 | 1859 | 0.989 | 5244 ATP-binding cassette, sub-family B (MDR/TAP), member 4                 |
| GO | nucleotide binding | 110 | 1859 | 0.989 | 54769 DIRAS family, GTP-binding RAS-like 2                                  |
| GO | nucleotide binding | 110 | 1859 | 0.989 | 55068 ecto-NOX disulfide-thiol exchanger 1                                  |
| GO | nucleotide binding | 110 | 1859 | 0.989 | 55601 DEAD (Asp-Glu-Ala-Asp) box polypeptide 60                             |
| GO | nucleotide binding | 110 | 1859 | 0.989 | 5577 protein kinase, cAMP-dependent, regulatory, type II, beta              |
| GO | nucleotide binding | 110 | 1859 | 0.989 | 5608 mitogen-activated protein kinase kinase 6                              |
| GO | nucleotide binding | 110 | 1859 | 0.989 | 57118 calcium/calmodulin-dependent protein kinase ID                        |
| GO | nucleotide binding | 110 | 1859 | 0.989 | 57494 ribosomal modification protein rimK-like family member B              |
| GO | nucleotide binding | 110 | 1859 | 0.989 | 57799 RAB40C, member RAS oncogene family                                    |
| GO | nucleotide binding | 110 | 1859 | 0.989 | 5873 RAB27A, member RAS oncogene family                                     |
| GO | nucleotide binding | 110 | 1859 | 0.989 | 64127 nucleotide-binding oligomerization domain containing 2                |
| GO | nucleotide binding | 110 | 1859 | 0.989 | 64135 interferon induced with helicase C domain 1                           |
| GO | nucleotide binding | 110 | 1859 | 0.989 | 6446 serum/glucocorticoid regulated kinase 1                                |
| GO | nucleotide binding | 110 | 1859 | 0.989 | 6850 spleen tyrosine kinase                                                 |
| GO | nucleotide binding | 110 | 1859 | 0.989 | 774 calcium channel, voltage-dependent, N type, alpha 1B subunit            |
| GO | nucleotide binding | 110 | 1859 | 0.989 | 79132 DEXH (Asp-Glu-X-His) box polypeptide 58                               |
| GO | nucleotide binding | 110 | 1859 | 0.989 | 79611 acyl-CoA synthetase short-chain family member 3                       |
| GO | nucleotide binding | 110 | 1859 | 0.989 | 79895 ATPase, class I, type 8B, member 4                                    |
| GO | nucleotide binding | 110 | 1859 | 0.989 | 80315 cytoplasmic polyadenylation element binding protein 4                 |
| GO | nucleotide binding | 110 | 1859 | 0.989 | 81788 NUAKE family, SNF1-like kinase, 2                                     |
| GO | nucleotide binding | 110 | 1859 | 0.989 | 83858 ATPase family, AAA domain containing 3B                               |
| GO | nucleotide binding | 110 | 1859 | 0.989 | 84033 obscurin, cytoskeletal calmodulin and titin-interacting RhoGEF        |
| GO | nucleotide binding | 110 | 1859 | 0.989 | 85004 RAS-like, estrogen-regulated, growth inhibitor                        |
| GO | nucleotide binding | 110 | 1859 | 0.989 | 8527 diacylglycerol kinase, delta 130kDa                                    |
| GO | nucleotide binding | 110 | 1859 | 0.989 | 85441 peroxisomal proliferator-activated receptor A interacting complex 285 |
| GO | nucleotide binding | 110 | 1859 | 0.989 | 8653 DEAD (Asp-Glu-Ala-Asp) box polypeptide 3, Y-linked                     |
| GO | nucleotide binding | 110 | 1859 | 0.989 | 9060 3'-phosphoadenosine 5'-phosphosulfate synthase 2                       |
| GO | nucleotide binding | 110 | 1859 | 0.989 | 9064 mitogen-activated protein kinase kinase kinase 6                       |
| GO | nucleotide binding | 110 | 1859 | 0.989 | 91 activin A receptor, type IB                                              |
| GO | nucleotide binding | 110 | 1859 | 0.989 | 91461 protein kinase domain containing, cytoplasmic homolog (mouse)         |
| GO | nucleotide binding | 110 | 1859 | 0.989 | 91607 schlafen family member 11                                             |
| GO | nucleotide binding | 110 | 1859 | 0.989 | 9263 serine/threonine kinase 17a                                            |
| GO | nucleotide binding | 110 | 1859 | 0.989 | 94 activin A receptor type II-like 1                                        |
| GO | nucleotide binding | 110 | 1859 | 0.989 | 9567 GTP binding protein 1                                                  |
| GO | nucleotide binding | 110 | 1859 | 0.989 | 9619 ATP-binding cassette, sub-family G (WHITE), member 1                   |

|    |                                       |     |      |       |                                                                                      |
|----|---------------------------------------|-----|------|-------|--------------------------------------------------------------------------------------|
| GO | nucleotide binding                    | 110 | 1859 | 0.989 | 9904 RNA binding motif protein 19                                                    |
| GO | nucleotide binding                    | 110 | 1859 | 0.989 | 9914 ATPase, Ca <sup>++</sup> transporting, type 2C, member 2                        |
| GO | ATPase activity                       | 8   | 128  | 0.989 | 1080 cystic fibrosis transmembrane conductance regulator (ATP-binding cas            |
| GO | ATPase activity                       | 8   | 128  | 0.989 | 148229 ATPase, class I, type 8B, member 3                                            |
| GO | ATPase activity                       | 8   | 128  | 0.989 | 23095 kinesin family member 1B                                                       |
| GO | ATPase activity                       | 8   | 128  | 0.989 | 368 ATP-binding cassette, sub-family C (CFTR/MRP), member 6                          |
| GO | ATPase activity                       | 8   | 128  | 0.989 | 498 ATP synthase, H <sup>+</sup> transporting, mitochondrial F1 complex, alpha subun |
| GO | ATPase activity                       | 8   | 128  | 0.989 | 5243 ATP-binding cassette, sub-family B (MDR/TAP), member 1                          |
| GO | ATPase activity                       | 8   | 128  | 0.989 | 5244 ATP-binding cassette, sub-family B (MDR/TAP), member 4                          |
| GO | ATPase activity                       | 8   | 128  | 0.989 | 9619 ATP-binding cassette, sub-family G (WHITE), member 1                            |
| GO | cholesterol biosynthetic process      | 1   | 25   | 0.989 | 1080 cystic fibrosis transmembrane conductance regulator (ATP-binding cas            |
| GO | cytoplasmic vesicle membrane          | 4   | 61   | 0.989 | 1080 cystic fibrosis transmembrane conductance regulator (ATP-binding cas            |
| GO | cytoplasmic vesicle membrane          | 4   | 61   | 0.989 | 23095 kinesin family member 1B                                                       |
| GO | cytoplasmic vesicle membrane          | 4   | 61   | 0.989 | 3601 interleukin 15 receptor, alpha                                                  |
| GO | cytoplasmic vesicle membrane          | 4   | 61   | 0.989 | 79971 wntless homolog (Drosophila)                                                   |
| GO | early endosome membrane               | 1   | 37   | 0.989 | 1080 cystic fibrosis transmembrane conductance regulator (ATP-binding cas            |
| GO | enzyme binding                        | 7   | 114  | 0.989 | 1080 cystic fibrosis transmembrane conductance regulator (ATP-binding cas            |
| GO | enzyme binding                        | 7   | 114  | 0.989 | 10811 NADPH oxidase activator 1                                                      |
| GO | enzyme binding                        | 7   | 114  | 0.989 | 1571 cytochrome P450, family 2, subfamily E, polypeptide 1                           |
| GO | enzyme binding                        | 7   | 114  | 0.989 | 1785 dynamin 2                                                                       |
| GO | enzyme binding                        | 7   | 114  | 0.989 | 3570 interleukin 6 receptor                                                          |
| GO | enzyme binding                        | 7   | 114  | 0.989 | 64127 nucleotide-binding oligomerization domain containing 2                         |
| GO | enzyme binding                        | 7   | 114  | 0.989 | 79444 baculoviral IAP repeat-containing 7                                            |
| GO | androgen receptor binding             | 1   | 29   | 0.989 | 10891 peroxisome proliferator-activated receptor gamma, coactivator 1 alpha          |
| GO | androgen receptor signaling pathway   | 1   | 39   | 0.989 | 10891 peroxisome proliferator-activated receptor gamma, coactivator 1 alpha          |
| GO | ligand-dependent nuclear receptor tr  | 1   | 31   | 0.989 | 10891 peroxisome proliferator-activated receptor gamma, coactivator 1 alpha          |
| GO | mitochondrion organization            | 1   | 25   | 0.989 | 10891 peroxisome proliferator-activated receptor gamma, coactivator 1 alpha          |
| GO | RNA polymerase II transcription med   | 1   | 28   | 0.989 | 10891 peroxisome proliferator-activated receptor gamma, coactivator 1 alpha          |
| GO | transcription initiation from RNA pol | 1   | 64   | 0.989 | 10891 peroxisome proliferator-activated receptor gamma, coactivator 1 alpha          |
| GO | DNA repair                            | 2   | 182  | 0.989 | 10912 growth arrest and DNA-damage-inducible, gamma                                  |
| GO | DNA repair                            | 2   | 182  | 0.989 | 26270 F-box protein 6                                                                |
| GO | molecular_function                    | 27  | 577  | 0.989 | 11043 midline 2                                                                      |
| GO | molecular_function                    | 27  | 577  | 0.989 | 11273 ataxin 2-like                                                                  |
| GO | molecular_function                    | 27  | 577  | 0.989 | 1154 cytokine inducible SH2-containing protein                                       |
| GO | molecular_function                    | 27  | 577  | 0.989 | 116844 leucine-rich alpha-2-glycoprotein 1                                           |
| GO | molecular_function                    | 27  | 577  | 0.989 | 117157 SH2 domain containing 1B                                                      |

|    |                           |    |     |       |                                                                  |
|----|---------------------------|----|-----|-------|------------------------------------------------------------------|
| GO | molecular_function        | 27 | 577 | 0.989 | 125476 INO80 complex subunit C                                   |
| GO | molecular_function        | 27 | 577 | 0.989 | 134218 DnaJ (Hsp40) homolog, subfamily C, member 21              |
| GO | molecular_function        | 27 | 577 | 0.989 | 202 absent in melanoma 1                                         |
| GO | molecular_function        | 27 | 577 | 0.989 | 2117 ets variant 3                                               |
| GO | molecular_function        | 27 | 577 | 0.989 | 22807 IKAROS family zinc finger 2 (Helios)                       |
| GO | molecular_function        | 27 | 577 | 0.989 | 26053 autism susceptibility candidate 2                          |
| GO | molecular_function        | 27 | 577 | 0.989 | 266675 bestrophin 4                                              |
| GO | molecular_function        | 27 | 577 | 0.989 | 26998 fetuin B                                                   |
| GO | molecular_function        | 27 | 577 | 0.989 | 3268 ArfGAP with FG repeats 2                                    |
| GO | molecular_function        | 27 | 577 | 0.989 | 3429 interferon, alpha-inducible protein 27                      |
| GO | molecular_function        | 27 | 577 | 0.989 | 3437 interferon-induced protein with tetratricopeptide repeats 3 |
| GO | molecular_function        | 27 | 577 | 0.989 | 345275 hydroxysteroid (17-beta) dehydrogenase 13                 |
| GO | molecular_function        | 27 | 577 | 0.989 | 345895 radial spoke head 4 homolog A (Chlamydomonas)             |
| GO | molecular_function        | 27 | 577 | 0.989 | 376940 zinc finger CCCH-type containing 6                        |
| GO | molecular_function        | 27 | 577 | 0.989 | 50486 G0/G1switch 2                                              |
| GO | molecular_function        | 27 | 577 | 0.989 | 5318 plakophilin 2                                               |
| GO | molecular_function        | 27 | 577 | 0.989 | 54664 transmembrane protein 106B                                 |
| GO | molecular_function        | 27 | 577 | 0.989 | 57464 family with sequence similarity 40, member B               |
| GO | molecular_function        | 27 | 577 | 0.989 | 57535 KIAA1324                                                   |
| GO | molecular_function        | 27 | 577 | 0.989 | 64651 cysteine-serine-rich nuclear protein 1                     |
| GO | molecular_function        | 27 | 577 | 0.989 | 7170 tropomyosin 3                                               |
| GO | molecular_function        | 27 | 577 | 0.989 | 9875 URB1 ribosome biogenesis 1 homolog (S. cerevisiae)          |
| GO | identical protein binding | 22 | 338 | 0.989 | 11156 protein tyrosine phosphatase type IVA, member 3            |
| GO | identical protein binding | 22 | 338 | 0.989 | 11213 interleukin-1 receptor-associated kinase 3                 |
| GO | identical protein binding | 22 | 338 | 0.989 | 1364 claudin 4                                                   |
| GO | identical protein binding | 22 | 338 | 0.989 | 154810 angiominin like 1                                         |
| GO | identical protein binding | 22 | 338 | 0.989 | 196383 Rab interacting lysosomal protein-like 2                  |
| GO | identical protein binding | 22 | 338 | 0.989 | 23048 formin binding protein 1                                   |
| GO | identical protein binding | 22 | 338 | 0.989 | 23604 death-associated protein kinase 2                          |
| GO | identical protein binding | 22 | 338 | 0.989 | 255738 proprotein convertase subtilisin/kexin type 9             |
| GO | identical protein binding | 22 | 338 | 0.989 | 259173 ALS2 C-terminal like                                      |
| GO | identical protein binding | 22 | 338 | 0.989 | 2752 glutamate-ammonia ligase (glutamine synthetase)             |
| GO | identical protein binding | 22 | 338 | 0.989 | 285704 RGM domain family, member B                               |
| GO | identical protein binding | 22 | 338 | 0.989 | 2947 glutathione S-transferase mu 3 (brain)                      |
| GO | identical protein binding | 22 | 338 | 0.989 | 4254 KIT ligand                                                  |
| GO | identical protein binding | 22 | 338 | 0.989 | 467 activating transcription factor 3                            |

|                                            |    |     |       |                                                                               |
|--------------------------------------------|----|-----|-------|-------------------------------------------------------------------------------|
| GO identical protein binding               | 22 | 338 | 0.989 | 4792 nuclear factor of kappa light polypeptide gene enhancer in B-cells inhib |
| GO identical protein binding               | 22 | 338 | 0.989 | 60485 salvador homolog 1 (Drosophila)                                         |
| GO identical protein binding               | 22 | 338 | 0.989 | 6622 synuclein, alpha (non A4 component of amyloid precursor)                 |
| GO identical protein binding               | 22 | 338 | 0.989 | 6812 syntaxin binding protein 1                                               |
| GO identical protein binding               | 22 | 338 | 0.989 | 6857 synaptotagmin I                                                          |
| GO identical protein binding               | 22 | 338 | 0.989 | 83593 Ras association (RalGDS/AF-6) domain family member 5                    |
| GO identical protein binding               | 22 | 338 | 0.989 | 8996 nucleolar protein 3 (apoptosis repressor with CARD domain)               |
| GO identical protein binding               | 22 | 338 | 0.989 | 9071 claudin 10                                                               |
| GO inhibition of adenylate cyclase activit | 2  | 30  | 0.989 | 112 adenylate cyclase 6                                                       |
| GO inhibition of adenylate cyclase activit | 2  | 30  | 0.989 | 4886 neuropeptide Y receptor Y1                                               |
| GO chromosome, telomeric region            | 1  | 23  | 0.989 | 11200 CHK2 checkpoint homolog (S. pombe)                                      |
| GO response to DNA damage stimulus         | 3  | 78  | 0.989 | 11200 CHK2 checkpoint homolog (S. pombe)                                      |
| GO response to DNA damage stimulus         | 3  | 78  | 0.989 | 151636 deltex 3-like (Drosophila)                                             |
| GO response to DNA damage stimulus         | 3  | 78  | 0.989 | 604 B-cell CLL/lymphoma 6                                                     |
| GO neuron projection morphogenesis         | 1  | 17  | 0.989 | 11202 kallikrein-related peptidase 8                                          |
| GO cell communication                      | 5  | 90  | 0.989 | 112574 sorting nexin 18                                                       |
| GO cell communication                      | 5  | 90  | 0.989 | 2707 gap junction protein, beta 3, 31kDa                                      |
| GO cell communication                      | 5  | 90  | 0.989 | 3691 integrin, beta 4                                                         |
| GO cell communication                      | 5  | 90  | 0.989 | 54877 zinc finger, CCHC domain containing 2                                   |
| GO cell communication                      | 5  | 90  | 0.989 | 84059 G protein-coupled receptor 98                                           |
| GO phosphoinositide binding                | 3  | 56  | 0.989 | 112574 sorting nexin 18                                                       |
| GO phosphoinositide binding                | 3  | 56  | 0.989 | 3709 inositol 1,4,5-triphosphate receptor, type 2                             |
| GO phosphoinositide binding                | 3  | 56  | 0.989 | 54877 zinc finger, CCHC domain containing 2                                   |
| GO cellular calcium ion homeostasis        | 4  | 60  | 0.989 | 1139 cholinergic receptor, nicotinic, alpha 7                                 |
| GO cellular calcium ion homeostasis        | 4  | 60  | 0.989 | 1813 dopamine receptor D2                                                     |
| GO cellular calcium ion homeostasis        | 4  | 60  | 0.989 | 1815 dopamine receptor D4                                                     |
| GO cellular calcium ion homeostasis        | 4  | 60  | 0.989 | 57620 stromal interaction molecule 2                                          |
| GO extracellular ligand-gated ion channe   | 3  | 46  | 0.989 | 1139 cholinergic receptor, nicotinic, alpha 7                                 |
| GO extracellular ligand-gated ion channe   | 3  | 46  | 0.989 | 2564 gamma-aminobutyric acid (GABA) A receptor, epsilon                       |
| GO extracellular ligand-gated ion channe   | 3  | 46  | 0.989 | 8973 cholinergic receptor, nicotinic, alpha 6                                 |
| GO postsynaptic membrane                   | 7  | 149 | 0.989 | 1139 cholinergic receptor, nicotinic, alpha 7                                 |
| GO postsynaptic membrane                   | 7  | 149 | 0.989 | 1785 dynamin 2                                                                |
| GO postsynaptic membrane                   | 7  | 149 | 0.989 | 2564 gamma-aminobutyric acid (GABA) A receptor, epsilon                       |
| GO postsynaptic membrane                   | 7  | 149 | 0.989 | 399694 SHC (Src homology 2 domain containing) family, member 4                |
| GO postsynaptic membrane                   | 7  | 149 | 0.989 | 8082 sarcospan (Kras oncogene-associated gene)                                |
| GO postsynaptic membrane                   | 7  | 149 | 0.989 | 8973 cholinergic receptor, nicotinic, alpha 6                                 |

|                                         |    |     |       |                                                                      |
|-----------------------------------------|----|-----|-------|----------------------------------------------------------------------|
| GO postsynaptic membrane                | 7  | 149 | 0.989 | 9892 synaptosomal-associated protein, 91kDa homolog (mouse)          |
| GO synapse                              | 16 | 255 | 0.989 | 1139 cholinergic receptor, nicotinic, alpha 7                        |
| GO synapse                              | 16 | 255 | 0.989 | 143425 synaptotagmin IX                                              |
| GO synapse                              | 16 | 255 | 0.989 | 1785 dynamin 2                                                       |
| GO synapse                              | 16 | 255 | 0.989 | 23208 synaptotagmin XI                                               |
| GO synapse                              | 16 | 255 | 0.989 | 2564 gamma-aminobutyric acid (GABA) A receptor, epsilon              |
| GO synapse                              | 16 | 255 | 0.989 | 2571 glutamate decarboxylase 1 (brain, 67kDa)                        |
| GO synapse                              | 16 | 255 | 0.989 | 3643 insulin receptor                                                |
| GO synapse                              | 16 | 255 | 0.989 | 375790 agrin                                                         |
| GO synapse                              | 16 | 255 | 0.989 | 399694 SHC (Src homology 2 domain containing) family, member 4       |
| GO synapse                              | 16 | 255 | 0.989 | 5025 purinergic receptor P2X, ligand-gated ion channel, 4            |
| GO synapse                              | 16 | 255 | 0.989 | 5327 plasminogen activator, tissue                                   |
| GO synapse                              | 16 | 255 | 0.989 | 55740 enabled homolog (Drosophila)                                   |
| GO synapse                              | 16 | 255 | 0.989 | 6857 synaptotagmin I                                                 |
| GO synapse                              | 16 | 255 | 0.989 | 729993 shisa homolog 9 (Xenopus laevis)                              |
| GO synapse                              | 16 | 255 | 0.989 | 8082 sarcospan (Kras oncogene-associated gene)                       |
| GO synapse                              | 16 | 255 | 0.989 | 8973 cholinergic receptor, nicotinic, alpha 6                        |
| GO G-protein coupled receptor protein s | 43 | 725 | 0.989 | 115330 G protein-coupled receptor 146                                |
| GO G-protein coupled receptor protein s | 43 | 725 | 0.989 | 121130 olfactory receptor, family 10, subfamily P, member 1          |
| GO G-protein coupled receptor protein s | 43 | 725 | 0.989 | 143503 olfactory receptor, family 51, subfamily E, member 1          |
| GO G-protein coupled receptor protein s | 43 | 725 | 0.989 | 154 adrenergic, beta-2-, receptor, surface                           |
| GO G-protein coupled receptor protein s | 43 | 725 | 0.989 | 1813 dopamine receptor D2                                            |
| GO G-protein coupled receptor protein s | 43 | 725 | 0.989 | 183 angiotensinogen (serpin peptidase inhibitor, clade A, member 8)  |
| GO G-protein coupled receptor protein s | 43 | 725 | 0.989 | 1901 sphingosine-1-phosphate receptor 1                              |
| GO G-protein coupled receptor protein s | 43 | 725 | 0.989 | 1902 lysophosphatidic acid receptor 1                                |
| GO G-protein coupled receptor protein s | 43 | 725 | 0.989 | 1906 endothelin 1                                                    |
| GO G-protein coupled receptor protein s | 43 | 725 | 0.989 | 2015 egf-like module containing, mucin-like, hormone receptor-like 1 |
| GO G-protein coupled receptor protein s | 43 | 725 | 0.989 | 222545 G protein-coupled receptor, family C, group 6, member A       |
| GO G-protein coupled receptor protein s | 43 | 725 | 0.989 | 22859 latrophilin 1                                                  |
| GO G-protein coupled receptor protein s | 43 | 725 | 0.989 | 23266 latrophilin 2                                                  |
| GO G-protein coupled receptor protein s | 43 | 725 | 0.989 | 23284 latrophilin 3                                                  |
| GO G-protein coupled receptor protein s | 43 | 725 | 0.989 | 23365 Rho guanine nucleotide exchange factor (GEF) 12                |
| GO G-protein coupled receptor protein s | 43 | 725 | 0.989 | 2642 glucagon receptor                                               |
| GO G-protein coupled receptor protein s | 43 | 725 | 0.989 | 27202 G protein-coupled receptor 77                                  |
| GO G-protein coupled receptor protein s | 43 | 725 | 0.989 | 283383 G protein-coupled receptor 133                                |
| GO G-protein coupled receptor protein s | 43 | 725 | 0.989 | 2861 G protein-coupled receptor 37 (endothelin receptor type B-like) |

|    |                                       |    |     |       |                                                             |
|----|---------------------------------------|----|-----|-------|-------------------------------------------------------------|
| GO | G-protein coupled receptor protein s  | 43 | 725 | 0.989 | 2865 free fatty acid receptor 3                             |
| GO | G-protein coupled receptor protein s  | 43 | 725 | 0.989 | 2867 free fatty acid receptor 2                             |
| GO | G-protein coupled receptor protein s  | 43 | 725 | 0.989 | 2911 glutamate receptor, metabotropic 1                     |
| GO | G-protein coupled receptor protein s  | 43 | 725 | 0.989 | 338557 G protein-coupled receptor 120                       |
| GO | G-protein coupled receptor protein s  | 43 | 725 | 0.989 | 353345 G protein-coupled receptor 141                       |
| GO | G-protein coupled receptor protein s  | 43 | 725 | 0.989 | 3643 insulin receptor                                       |
| GO | G-protein coupled receptor protein s  | 43 | 725 | 0.989 | 387509 G protein-coupled receptor 153                       |
| GO | G-protein coupled receptor protein s  | 43 | 725 | 0.989 | 392392 olfactory receptor, family 1, subfamily K, member 1  |
| GO | G-protein coupled receptor protein s  | 43 | 725 | 0.989 | 4889 neuropeptide Y receptor Y5                             |
| GO | G-protein coupled receptor protein s  | 43 | 725 | 0.989 | 5132 phosducin                                              |
| GO | G-protein coupled receptor protein s  | 43 | 725 | 0.989 | 51655 RAS, dexamethasone-induced 1                          |
| GO | G-protein coupled receptor protein s  | 43 | 725 | 0.989 | 5724 platelet-activating factor receptor                    |
| GO | G-protein coupled receptor protein s  | 43 | 725 | 0.989 | 5732 prostaglandin E receptor 2 (subtype EP2), 53kDa        |
| GO | G-protein coupled receptor protein s  | 43 | 725 | 0.989 | 5734 prostaglandin E receptor 4 (subtype EP4)               |
| GO | G-protein coupled receptor protein s  | 43 | 725 | 0.989 | 5737 prostaglandin F receptor (FP)                          |
| GO | G-protein coupled receptor protein s  | 43 | 725 | 0.989 | 57512 G protein-coupled receptor 158                        |
| GO | G-protein coupled receptor protein s  | 43 | 725 | 0.989 | 6750 somatostatin                                           |
| GO | G-protein coupled receptor protein s  | 43 | 725 | 0.989 | 718 complement component 3                                  |
| GO | G-protein coupled receptor protein s  | 43 | 725 | 0.989 | 7852 chemokine (C-X-C motif) receptor 4                     |
| GO | G-protein coupled receptor protein s  | 43 | 725 | 0.989 | 799 calcitonin receptor                                     |
| GO | G-protein coupled receptor protein s  | 43 | 725 | 0.989 | 81285 olfactory receptor, family 51, subfamily E, member 2  |
| GO | G-protein coupled receptor protein s  | 43 | 725 | 0.989 | 81470 olfactory receptor, family 2, subfamily G, member 2   |
| GO | G-protein coupled receptor protein s  | 43 | 725 | 0.989 | 84059 G protein-coupled receptor 98                         |
| GO | G-protein coupled receptor protein s  | 43 | 725 | 0.989 | 8938 BAI1-associated protein 3                              |
| GO | electron carrier activity             | 10 | 149 | 0.989 | 1193 chloride intracellular channel 2                       |
| GO | electron carrier activity             | 10 | 149 | 0.989 | 1558 cytochrome P450, family 2, subfamily C, polypeptide 8  |
| GO | electron carrier activity             | 10 | 149 | 0.989 | 1559 cytochrome P450, family 2, subfamily C, polypeptide 9  |
| GO | electron carrier activity             | 10 | 149 | 0.989 | 1571 cytochrome P450, family 2, subfamily E, polypeptide 1  |
| GO | electron carrier activity             | 10 | 149 | 0.989 | 1577 cytochrome P450, family 3, subfamily A, polypeptide 5  |
| GO | electron carrier activity             | 10 | 149 | 0.989 | 27035 NADPH oxidase 1                                       |
| GO | electron carrier activity             | 10 | 149 | 0.989 | 316 aldehyde oxidase 1                                      |
| GO | electron carrier activity             | 10 | 149 | 0.989 | 4129 monoamine oxidase B                                    |
| GO | electron carrier activity             | 10 | 149 | 0.989 | 6916 thromboxane A synthase 1 (platelet)                    |
| GO | electron carrier activity             | 10 | 149 | 0.989 | 79689 STEAP family member 4                                 |
| GO | protein disulfide oxidoreductase acti | 1  | 15  | 0.989 | 1193 chloride intracellular channel 2                       |
| GO | olfactory receptor activity           | 5  | 290 | 0.989 | 121130 olfactory receptor, family 10, subfamily P, member 1 |



|                                 |    |     |       |                                                                                      |
|---------------------------------|----|-----|-------|--------------------------------------------------------------------------------------|
| GO olfactory receptor activity  | 5  | 290 | 0.989 | 143503 olfactory receptor, family 51, subfamily E, member 1                          |
| GO olfactory receptor activity  | 5  | 290 | 0.989 | 392392 olfactory receptor, family 1, subfamily K, member 1                           |
| GO olfactory receptor activity  | 5  | 290 | 0.989 | 81285 olfactory receptor, family 51, subfamily E, member 2                           |
| GO olfactory receptor activity  | 5  | 290 | 0.989 | 81470 olfactory receptor, family 2, subfamily G, member 2                            |
| GO response to stimulus         | 17 | 477 | 0.989 | 121130 olfactory receptor, family 10, subfamily P, member 1                          |
| GO response to stimulus         | 17 | 477 | 0.989 | 143503 olfactory receptor, family 51, subfamily E, member 1                          |
| GO response to stimulus         | 17 | 477 | 0.989 | 23418 crumbs homolog 1 (Drosophila)                                                  |
| GO response to stimulus         | 17 | 477 | 0.989 | 368 ATP-binding cassette, sub-family C (CFTR/MRP), member 6                          |
| GO response to stimulus         | 17 | 477 | 0.989 | 392392 olfactory receptor, family 1, subfamily K, member 1                           |
| GO response to stimulus         | 17 | 477 | 0.989 | 5132 phosducin                                                                       |
| GO response to stimulus         | 17 | 477 | 0.989 | 5158 phosphodiesterase 6B, cGMP-specific, rod, beta                                  |
| GO response to stimulus         | 17 | 477 | 0.989 | 5950 retinol binding protein 4, plasma                                               |
| GO response to stimulus         | 17 | 477 | 0.989 | 6096 RAR-related orphan receptor B                                                   |
| GO response to stimulus         | 17 | 477 | 0.989 | 6101 retinitis pigmentosa 1 (autosomal dominant)                                     |
| GO response to stimulus         | 17 | 477 | 0.989 | 81285 olfactory receptor, family 51, subfamily E, member 2                           |
| GO response to stimulus         | 17 | 477 | 0.989 | 81470 olfactory receptor, family 2, subfamily G, member 2                            |
| GO response to stimulus         | 17 | 477 | 0.989 | 83394 PITPNM family member 3                                                         |
| GO response to stimulus         | 17 | 477 | 0.989 | 83872 hemicentin 1                                                                   |
| GO response to stimulus         | 17 | 477 | 0.989 | 84059 G protein-coupled receptor 98                                                  |
| GO response to stimulus         | 17 | 477 | 0.989 | 8842 prominin 1                                                                      |
| GO response to stimulus         | 17 | 477 | 0.989 | 93589 calcium channel, voltage-dependent, alpha 2/delta subunit 4                    |
| GO sensory perception of smell  | 6  | 305 | 0.989 | 121130 olfactory receptor, family 10, subfamily P, member 1                          |
| GO sensory perception of smell  | 6  | 305 | 0.989 | 143503 olfactory receptor, family 51, subfamily E, member 1                          |
| GO sensory perception of smell  | 6  | 305 | 0.989 | 1813 dopamine receptor D2                                                            |
| GO sensory perception of smell  | 6  | 305 | 0.989 | 392392 olfactory receptor, family 1, subfamily K, member 1                           |
| GO sensory perception of smell  | 6  | 305 | 0.989 | 81285 olfactory receptor, family 51, subfamily E, member 2                           |
| GO sensory perception of smell  | 6  | 305 | 0.989 | 81470 olfactory receptor, family 2, subfamily G, member 2                            |
| GO mitochondrial inner membrane | 10 | 231 | 0.989 | 123096 solute carrier family 25, member 29                                           |
| GO mitochondrial inner membrane | 10 | 231 | 0.989 | 1373 carbamoyl-phosphate synthetase 1, mitochondrial                                 |
| GO mitochondrial inner membrane | 10 | 231 | 0.989 | 137994 leucine zipper-EF-hand containing transmembrane protein 2                     |
| GO mitochondrial inner membrane | 10 | 231 | 0.989 | 3958 lectin, galactoside-binding, soluble, 3                                         |
| GO mitochondrial inner membrane | 10 | 231 | 0.989 | 4129 monoamine oxidase B                                                             |
| GO mitochondrial inner membrane | 10 | 231 | 0.989 | 498 ATP synthase, H <sup>+</sup> transporting, mitochondrial F1 complex, alpha subun |
| GO mitochondrial inner membrane | 10 | 231 | 0.989 | 51703 acyl-CoA synthetase long-chain family member 5                                 |
| GO mitochondrial inner membrane | 10 | 231 | 0.989 | 5577 protein kinase, cAMP-dependent, regulatory, type II, beta                       |
| GO mitochondrial inner membrane | 10 | 231 | 0.989 | 622 3-hydroxybutyrate dehydrogenase, type 1                                          |

|    |                                       |    |     |       |                                                                               |
|----|---------------------------------------|----|-----|-------|-------------------------------------------------------------------------------|
| GO | mitochondrial inner membrane          | 10 | 231 | 0.989 | 9481 solute carrier family 25, member 27                                      |
| GO | MLL1 complex                          | 1  | 26  | 0.989 | 125476 INO80 complex subunit C                                                |
| GO | cell cycle arrest                     | 5  | 108 | 0.989 | 127933 U2AF homology motif (UHM) kinase 1                                     |
| GO | cell cycle arrest                     | 5  | 108 | 0.989 | 4853 Notch homolog 2 (Drosophila)                                             |
| GO | cell cycle arrest                     | 5  | 108 | 0.989 | 5325 pleiomorphic adenoma gene-like 1                                         |
| GO | cell cycle arrest                     | 5  | 108 | 0.989 | 5371 promyelocytic leukemia                                                   |
| GO | cell cycle arrest                     | 5  | 108 | 0.989 | 5608 mitogen-activated protein kinase kinase 6                                |
| GO | neuron projection development         | 2  | 41  | 0.989 | 127933 U2AF homology motif (UHM) kinase 1                                     |
| GO | neuron projection development         | 2  | 41  | 0.989 | 3569 interleukin 6 (interferon, beta 2)                                       |
| GO | peptidyl-serine phosphorylation       | 1  | 26  | 0.989 | 127933 U2AF homology motif (UHM) kinase 1                                     |
| GO | Rab GTPase activator activity         | 2  | 44  | 0.989 | 129049 small G protein signaling modulator 1                                  |
| GO | Rab GTPase activator activity         | 2  | 44  | 0.989 | 55357 TBC1 domain family, member 2                                            |
| GO | regulation of Rab GTPase activity     | 2  | 44  | 0.989 | 129049 small G protein signaling modulator 1                                  |
| GO | regulation of Rab GTPase activity     | 2  | 44  | 0.989 | 55357 TBC1 domain family, member 2                                            |
| GO | post-translational protein modificati | 1  | 27  | 0.989 | 134111 ubiquitin-conjugating enzyme E2Q family-like 1                         |
| GO | regulation of protein metabolic proce | 2  | 42  | 0.989 | 134111 ubiquitin-conjugating enzyme E2Q family-like 1                         |
| GO | regulation of protein metabolic proce | 2  | 42  | 0.989 | 3479 insulin-like growth factor 1 (somatomedin C)                             |
| GO | heat shock protein binding            | 4  | 62  | 0.989 | 134218 DnaJ (Hsp40) homolog, subfamily C, member 21                           |
| GO | heat shock protein binding            | 4  | 62  | 0.989 | 29103 DnaJ (Hsp40) homolog, subfamily C, member 15                            |
| GO | heat shock protein binding            | 4  | 62  | 0.989 | 4792 nuclear factor of kappa light polypeptide gene enhancer in B-cells inhib |
| GO | heat shock protein binding            | 4  | 62  | 0.989 | 84277 DnaJ (Hsp40) homolog, subfamily C, member 30                            |
| GO | nucleic acid binding                  | 9  | 254 | 0.989 | 134218 DnaJ (Hsp40) homolog, subfamily C, member 21                           |
| GO | nucleic acid binding                  | 9  | 254 | 0.989 | 201501 zinc finger and BTB domain containing 7C                               |
| GO | nucleic acid binding                  | 9  | 254 | 0.989 | 23081 lysine (K)-specific demethylase 4C                                      |
| GO | nucleic acid binding                  | 9  | 254 | 0.989 | 376940 zinc finger CCCH-type containing 6                                     |
| GO | nucleic acid binding                  | 9  | 254 | 0.989 | 400713 zinc finger protein 880                                                |
| GO | nucleic acid binding                  | 9  | 254 | 0.989 | 54877 zinc finger, CCHC domain containing 2                                   |
| GO | nucleic acid binding                  | 9  | 254 | 0.989 | 54932 exonuclease 3'-5' domain containing 3                                   |
| GO | nucleic acid binding                  | 9  | 254 | 0.989 | 55068 ecto-NOX disulfide-thiol exchanger 1                                    |
| GO | nucleic acid binding                  | 9  | 254 | 0.989 | 94059 leukocyte receptor cluster (LRC) member 9                               |
| GO | protein folding                       | 5  | 139 | 0.989 | 134218 DnaJ (Hsp40) homolog, subfamily C, member 21                           |
| GO | protein folding                       | 5  | 139 | 0.989 | 4802 nuclear transcription factor Y, gamma                                    |
| GO | protein folding                       | 5  | 139 | 0.989 | 51303 FK506 binding protein 11, 19 kDa                                        |
| GO | protein folding                       | 5  | 139 | 0.989 | 56605 ERO1-like beta (S. cerevisiae)                                          |
| GO | protein folding                       | 5  | 139 | 0.989 | 84277 DnaJ (Hsp40) homolog, subfamily C, member 30                            |
| GO | ribosome                              | 3  | 172 | 0.989 | 134218 DnaJ (Hsp40) homolog, subfamily C, member 21                           |

|    |                        |    |     |       |                                                                |
|----|------------------------|----|-----|-------|----------------------------------------------------------------|
| GO | ribosome               | 3  | 172 | 0.989 | 1540 cylindromatosis (turban tumor syndrome)                   |
| GO | ribosome               | 3  | 172 | 0.989 | 6238 ribosome binding protein 1 homolog 180kDa (dog)           |
| GO | actin filament binding | 3  | 50  | 0.989 | 134549 shroom family member 1                                  |
| GO | actin filament binding | 3  | 50  | 0.989 | 6710 spectrin, beta, erythrocytic                              |
| GO | actin filament binding | 3  | 50  | 0.989 | 85477 scinderin                                                |
| GO | metabolic process      | 31 | 455 | 0.989 | 1363 carboxypeptidase E                                        |
| GO | metabolic process      | 31 | 455 | 0.989 | 148229 ATPase, class I, type 8B, member 3                      |
| GO | metabolic process      | 31 | 455 | 0.989 | 157855 potassium channel, subfamily U, member 1                |
| GO | metabolic process      | 31 | 455 | 0.989 | 200150 phospholipase D family, member 5                        |
| GO | metabolic process      | 31 | 455 | 0.989 | 2182 acyl-CoA synthetase long-chain family member 4            |
| GO | metabolic process      | 31 | 455 | 0.989 | 22901 arylsulfatase G                                          |
| GO | metabolic process      | 31 | 455 | 0.989 | 23382 adenosylhomocysteinase-like 2                            |
| GO | metabolic process      | 31 | 455 | 0.989 | 2517 fucosidase, alpha-L- 1, tissue                            |
| GO | metabolic process      | 31 | 455 | 0.989 | 2947 glutathione S-transferase mu 3 (brain)                    |
| GO | metabolic process      | 31 | 455 | 0.989 | 2990 glucuronidase, beta                                       |
| GO | metabolic process      | 31 | 455 | 0.989 | 3373 hyaluronoglucosaminidase 1                                |
| GO | metabolic process      | 31 | 455 | 0.989 | 343450 potassium channel, subfamily T, member 2                |
| GO | metabolic process      | 31 | 455 | 0.989 | 412 steroid sulfatase (microsomal), isozyme S                  |
| GO | metabolic process      | 31 | 455 | 0.989 | 4121 mannosidase, alpha, class 1A, member 1                    |
| GO | metabolic process      | 31 | 455 | 0.989 | 4316 matrix metalloproteinase 7 (matrilysin, uterine)          |
| GO | metabolic process      | 31 | 455 | 0.989 | 48 aconitase 1, soluble                                        |
| GO | metabolic process      | 31 | 455 | 0.989 | 493 ATPase, Ca <sup>++</sup> transporting, plasma membrane 4   |
| GO | metabolic process      | 31 | 455 | 0.989 | 5122 proprotein convertase subtilisin/kexin type 1             |
| GO | metabolic process      | 31 | 455 | 0.989 | 51703 acyl-CoA synthetase long-chain family member 5           |
| GO | metabolic process      | 31 | 455 | 0.989 | 54511 3-hydroxymethyl-3-methylglutaryl-Coenzyme A lyase-like 1 |
| GO | metabolic process      | 31 | 455 | 0.989 | 54947 lysophosphatidylcholine acyltransferase 2                |
| GO | metabolic process      | 31 | 455 | 0.989 | 55140 elongation protein 3 homolog ( <i>S. cerevisiae</i> )    |
| GO | metabolic process      | 31 | 455 | 0.989 | 55268 enoyl Coenzyme A hydratase domain containing 2           |
| GO | metabolic process      | 31 | 455 | 0.989 | 57104 patatin-like phospholipase domain containing 2           |
| GO | metabolic process      | 31 | 455 | 0.989 | 57134 mannosidase, alpha, class 1C, member 1                   |
| GO | metabolic process      | 31 | 455 | 0.989 | 622 3-hydroxybutyrate dehydrogenase, type 1                    |
| GO | metabolic process      | 31 | 455 | 0.989 | 64064 3-oxoacid CoA transferase 2                              |
| GO | metabolic process      | 31 | 455 | 0.989 | 79611 acyl-CoA synthetase short-chain family member 3          |
| GO | metabolic process      | 31 | 455 | 0.989 | 79661 nei endonuclease VIII-like 1 ( <i>E. coli</i> )          |
| GO | metabolic process      | 31 | 455 | 0.989 | 952 CD38 molecule                                              |
| GO | metabolic process      | 31 | 455 | 0.989 | 9914 ATPase, Ca <sup>++</sup> transporting, type 2C, member 2  |

|                                 |   |     |       |                                                                                      |
|---------------------------------|---|-----|-------|--------------------------------------------------------------------------------------|
| GO metallopeptidase activity    | 6 | 88  | 0.989 | 1363 carboxypeptidase E                                                              |
| GO metallopeptidase activity    | 6 | 88  | 0.989 | 1368 carboxypeptidase M                                                              |
| GO metallopeptidase activity    | 6 | 88  | 0.989 | 57094 carboxypeptidase A6                                                            |
| GO metallopeptidase activity    | 6 | 88  | 0.989 | 79956 endoplasmic reticulum metallopeptidase 1                                       |
| GO metallopeptidase activity    | 6 | 88  | 0.989 | 8751 ADAM metallopeptidase domain 15                                                 |
| GO metallopeptidase activity    | 6 | 88  | 0.989 | 9510 ADAM metallopeptidase with thrombospondin type 1 motif, 1                       |
| GO protein modification process | 9 | 145 | 0.989 | 1363 carboxypeptidase E                                                              |
| GO protein modification process | 9 | 145 | 0.989 | 26232 F-box protein 2                                                                |
| GO protein modification process | 9 | 145 | 0.989 | 284716 ribosomal modification protein rimK-like family member A                      |
| GO protein modification process | 9 | 145 | 0.989 | 29943 peptidyl arginine deiminase, type I                                            |
| GO protein modification process | 9 | 145 | 0.989 | 4015 lysyl oxidase                                                                   |
| GO protein modification process | 9 | 145 | 0.989 | 5066 peptidylglycine alpha-amidating monooxygenase                                   |
| GO protein modification process | 9 | 145 | 0.989 | 5327 plasminogen activator, tissue                                                   |
| GO protein modification process | 9 | 145 | 0.989 | 5351 procollagen-lysine 1, 2-oxoglutarate 5-dioxygenase 1                            |
| GO protein modification process | 9 | 145 | 0.989 | 57494 ribosomal modification protein rimK-like family member B                       |
| GO structural molecule activity | 8 | 196 | 0.989 | 1364 claudin 4                                                                       |
| GO structural molecule activity | 8 | 196 | 0.989 | 3911 laminin, alpha 5                                                                |
| GO structural molecule activity | 8 | 196 | 0.989 | 3913 laminin, beta 2 (laminin S)                                                     |
| GO structural molecule activity | 8 | 196 | 0.989 | 3914 laminin, beta 3                                                                 |
| GO structural molecule activity | 8 | 196 | 0.989 | 4359 myelin protein zero                                                             |
| GO structural molecule activity | 8 | 196 | 0.989 | 5239 phosphoglucomutase 5                                                            |
| GO structural molecule activity | 8 | 196 | 0.989 | 9019 myelin protein zero-like 1                                                      |
| GO structural molecule activity | 8 | 196 | 0.989 | 9071 claudin 10                                                                      |
| GO mitochondrial matrix         | 5 | 147 | 0.989 | 1373 carbamoyl-phosphate synthetase 1, mitochondrial                                 |
| GO mitochondrial matrix         | 5 | 147 | 0.989 | 205 adenylate kinase 3-like 1                                                        |
| GO mitochondrial matrix         | 5 | 147 | 0.989 | 35 acyl-Coenzyme A dehydrogenase, C-2 to C-3 short chain                             |
| GO mitochondrial matrix         | 5 | 147 | 0.989 | 498 ATP synthase, H <sup>+</sup> transporting, mitochondrial F1 complex, alpha subun |
| GO mitochondrial matrix         | 5 | 147 | 0.989 | 622 3-hydroxybutyrate dehydrogenase, type 1                                          |
| GO mitochondrial nucleoid       | 1 | 31  | 0.989 | 1373 carbamoyl-phosphate synthetase 1, mitochondrial                                 |
| GO protein complex              | 8 | 153 | 0.989 | 1373 carbamoyl-phosphate synthetase 1, mitochondrial                                 |
| GO protein complex              | 8 | 153 | 0.989 | 4005 LIM domain only 2 (rhombotin-like 1)                                            |
| GO protein complex              | 8 | 153 | 0.989 | 5071 Parkinson disease (autosomal recessive, juvenile) 2, parkin                     |
| GO protein complex              | 8 | 153 | 0.989 | 57161 pellino homolog 2 (Drosophila)                                                 |
| GO protein complex              | 8 | 153 | 0.989 | 6494 signal-induced proliferation-associated 1                                       |
| GO protein complex              | 8 | 153 | 0.989 | 6710 spectrin, beta, erythrocytic                                                    |
| GO protein complex              | 8 | 153 | 0.989 | 6812 syntaxin binding protein 1                                                      |

|                                            |    |     |       |                                                                             |
|--------------------------------------------|----|-----|-------|-----------------------------------------------------------------------------|
| GO protein complex                         | 8  | 153 | 0.989 | 85477 scinderin                                                             |
| GO cytoplasmic vesicle                     | 14 | 229 | 0.989 | 143425 synaptotagmin IX                                                     |
| GO cytoplasmic vesicle                     | 14 | 229 | 0.989 | 23208 synaptotagmin XI                                                      |
| GO cytoplasmic vesicle                     | 14 | 229 | 0.989 | 25956 SEC31 homolog B ( <i>S. cerevisiae</i> )                              |
| GO cytoplasmic vesicle                     | 14 | 229 | 0.989 | 3601 interleukin 15 receptor, alpha                                         |
| GO cytoplasmic vesicle                     | 14 | 229 | 0.989 | 4179 CD46 molecule, complement regulatory protein                           |
| GO cytoplasmic vesicle                     | 14 | 229 | 0.989 | 5016 oviductal glycoprotein 1, 120kDa                                       |
| GO cytoplasmic vesicle                     | 14 | 229 | 0.989 | 5122 proprotein convertase subtilisin/kexin type 1                          |
| GO cytoplasmic vesicle                     | 14 | 229 | 0.989 | 6857 synaptotagmin I                                                        |
| GO cytoplasmic vesicle                     | 14 | 229 | 0.989 | 7852 chemokine (C-X-C motif) receptor 4                                     |
| GO cytoplasmic vesicle                     | 14 | 229 | 0.989 | 79971 wntless homolog ( <i>Drosophila</i> )                                 |
| GO cytoplasmic vesicle                     | 14 | 229 | 0.989 | 80223 RAB11 family interacting protein 1 (class I)                          |
| GO cytoplasmic vesicle                     | 14 | 229 | 0.989 | 80763 chromosome 12 open reading frame 39                                   |
| GO cytoplasmic vesicle                     | 14 | 229 | 0.989 | 9143 synaptogyrin 3                                                         |
| GO cytoplasmic vesicle                     | 14 | 229 | 0.989 | 9510 ADAM metallopeptidase with thrombospondin type 1 motif, 1              |
| GO homeostasis of number of cells within   | 1  | 15  | 0.989 | 1435 colony stimulating factor 1 (macrophage)                               |
| GO positive regulation of protein kinase ; | 1  | 16  | 0.989 | 1435 colony stimulating factor 1 (macrophage)                               |
| GO regulation of translation               | 3  | 61  | 0.989 | 143689 piwi-like 4 ( <i>Drosophila</i> )                                    |
| GO regulation of translation               | 3  | 61  | 0.989 | 84919 protein phosphatase 1, regulatory (inhibitor) subunit 15B             |
| GO regulation of translation               | 3  | 61  | 0.989 | 9271 piwi-like 1 ( <i>Drosophila</i> )                                      |
| GO spermatogenesis                         | 16 | 261 | 0.989 | 143689 piwi-like 4 ( <i>Drosophila</i> )                                    |
| GO spermatogenesis                         | 16 | 261 | 0.989 | 3815 v-kit Hardy-Zuckerman 4 feline sarcoma viral oncogene homolog          |
| GO spermatogenesis                         | 16 | 261 | 0.989 | 4851 Notch homolog 1, translocation-associated ( <i>Drosophila</i> )        |
| GO spermatogenesis                         | 16 | 261 | 0.989 | 51314 thioredoxin domain containing 3 (spermatzoa)                          |
| GO spermatogenesis                         | 16 | 261 | 0.989 | 5367 pro-melanin-concentrating hormone                                      |
| GO spermatogenesis                         | 16 | 261 | 0.989 | 55124 piwi-like 2 ( <i>Drosophila</i> )                                     |
| GO spermatogenesis                         | 16 | 261 | 0.989 | 5950 retinol binding protein 4, plasma                                      |
| GO spermatogenesis                         | 16 | 261 | 0.989 | 604 B-cell CLL/lymphoma 6                                                   |
| GO spermatogenesis                         | 16 | 261 | 0.989 | 79820 cation channel, sperm-associated, beta                                |
| GO spermatogenesis                         | 16 | 261 | 0.989 | 8382 non-metastatic cells 5, protein expressed in (nucleoside-diphosphate k |
| GO spermatogenesis                         | 16 | 261 | 0.989 | 83890 spermatogenesis associated 9                                          |
| GO spermatogenesis                         | 16 | 261 | 0.989 | 8531 cold shock domain protein A                                            |
| GO spermatogenesis                         | 16 | 261 | 0.989 | 8900 cyclin A1                                                              |
| GO spermatogenesis                         | 16 | 261 | 0.989 | 9271 piwi-like 1 ( <i>Drosophila</i> )                                      |
| GO spermatogenesis                         | 16 | 261 | 0.989 | 9633 metallothionein-like 5, testis-specific (tesmin)                       |
| GO spermatogenesis                         | 16 | 261 | 0.989 | 9985 REC8 homolog (yeast)                                                   |

|    |                                       |   |     |       |                                                                                |
|----|---------------------------------------|---|-----|-------|--------------------------------------------------------------------------------|
| GO | microtubule motor activity            | 3 | 76  | 0.989 | 144132 dynein heavy chain domain 1                                             |
| GO | microtubule motor activity            | 3 | 76  | 0.989 | 23095 kinesin family member 1B                                                 |
| GO | microtubule motor activity            | 3 | 76  | 0.989 | 23303 kinesin family member 13B                                                |
| GO | microtubule-based movement            | 3 | 84  | 0.989 | 144132 dynein heavy chain domain 1                                             |
| GO | microtubule-based movement            | 3 | 84  | 0.989 | 23095 kinesin family member 1B                                                 |
| GO | microtubule-based movement            | 3 | 84  | 0.989 | 23303 kinesin family member 13B                                                |
| GO | hyaluronic acid binding               | 1 | 19  | 0.989 | 1462 versican                                                                  |
| GO | Rho protein signal transduction       | 2 | 36  | 0.989 | 148170 CDC42 effector protein (Rho GTPase binding) 5                           |
| GO | Rho protein signal transduction       | 2 | 36  | 0.989 | 395 Rho GTPase activating protein 6                                            |
| GO | binding of sperm to zona pellucida    | 1 | 15  | 0.989 | 148229 ATPase, class I, type 8B, member 3                                      |
| GO | autophagy                             | 2 | 36  | 0.989 | 1508 cathepsin B                                                               |
| GO | autophagy                             | 2 | 36  | 0.989 | 55332 DNA-damage regulated autophagy modulator 1                               |
| GO | histone binding                       | 3 | 44  | 0.989 | 151636 deltex 3-like (Drosophila)                                              |
| GO | histone binding                       | 3 | 44  | 0.989 | 55705 importin 9                                                               |
| GO | histone binding                       | 3 | 44  | 0.989 | 6622 synuclein, alpha (non A4 component of amyloid precursor)                  |
| GO | ruffle                                | 3 | 53  | 0.989 | 152273 FYVE, RhoGEF and PH domain containing 5                                 |
| GO | ruffle                                | 3 | 53  | 0.989 | 3678 integrin, alpha 5 (fibronectin receptor, alpha polypeptide)               |
| GO | ruffle                                | 3 | 53  | 0.989 | 9788 metastasis suppressor 1                                                   |
| GO | cysteine-type peptidase activity      | 3 | 76  | 0.989 | 1540 cylindromatosis (turban tumor syndrome)                                   |
| GO | cysteine-type peptidase activity      | 3 | 76  | 0.989 | 25862 ubiquitin specific peptidase 49                                          |
| GO | cysteine-type peptidase activity      | 3 | 76  | 0.989 | 55432 YOD1 OTU deubiquinating enzyme 1 homolog (S. cerevisiae)                 |
| GO | structural constituent of ribosome    | 1 | 146 | 0.989 | 1540 cylindromatosis (turban tumor syndrome)                                   |
| GO | translation                           | 2 | 197 | 0.989 | 1540 cylindromatosis (turban tumor syndrome)                                   |
| GO | translation                           | 2 | 197 | 0.989 | 6238 ribosome binding protein 1 homolog 180kDa (dog)                           |
| GO | ubiquitin thiolesterase activity      | 3 | 68  | 0.989 | 1540 cylindromatosis (turban tumor syndrome)                                   |
| GO | ubiquitin thiolesterase activity      | 3 | 68  | 0.989 | 159195 ubiquitin specific peptidase 54                                         |
| GO | ubiquitin thiolesterase activity      | 3 | 68  | 0.989 | 25862 ubiquitin specific peptidase 49                                          |
| GO | ubiquitin-dependent protein cataboli  | 5 | 139 | 0.989 | 1540 cylindromatosis (turban tumor syndrome)                                   |
| GO | ubiquitin-dependent protein cataboli  | 5 | 139 | 0.989 | 159195 ubiquitin specific peptidase 54                                         |
| GO | ubiquitin-dependent protein cataboli  | 5 | 139 | 0.989 | 25862 ubiquitin specific peptidase 49                                          |
| GO | ubiquitin-dependent protein cataboli  | 5 | 139 | 0.989 | 5071 Parkinson disease (autosomal recessive, juvenile) 2, parkin               |
| GO | ubiquitin-dependent protein cataboli  | 5 | 139 | 0.989 | 6921 transcription elongation factor B (SIII), polypeptide 1 (15kDa, elongin C |
| GO | intrinsic to endoplasmic reticulum m  | 1 | 16  | 0.989 | 1571 cytochrome P450, family 2, subfamily E, polypeptide 1                     |
| GO | RNA polymerase II transcription factc | 8 | 126 | 0.989 | 1628 D site of albumin promoter (albumin D-box) binding protein                |
| GO | RNA polymerase II transcription factc | 8 | 126 | 0.989 | 3725 jun oncogene                                                              |
| GO | RNA polymerase II transcription factc | 8 | 126 | 0.989 | 3726 jun B proto-oncogene                                                      |

|    |                                        |   |     |       |                                                                   |
|----|----------------------------------------|---|-----|-------|-------------------------------------------------------------------|
| GO | RNA polymerase II transcription factc  | 8 | 126 | 0.989 | 4802 nuclear transcription factor Y, gamma                        |
| GO | RNA polymerase II transcription factc  | 8 | 126 | 0.989 | 51621 Kruppel-like factor 13                                      |
| GO | RNA polymerase II transcription factc  | 8 | 126 | 0.989 | 55870 ash1 (absent, small, or homeotic)-like (Drosophila)         |
| GO | RNA polymerase II transcription factc  | 8 | 126 | 0.989 | 7008 thyrotrophic embryonic factor                                |
| GO | RNA polymerase II transcription factc  | 8 | 126 | 0.989 | 8531 cold shock domain protein A                                  |
| GO | kinase activity                        | 2 | 117 | 0.989 | 166929 sphingomyelin synthase 2                                   |
| GO | kinase activity                        | 2 | 117 | 0.989 | 57147 SCY1-like 3 (S. cerevisiae)                                 |
| GO | metalloendopeptidase activity          | 6 | 102 | 0.989 | 170692 ADAM metallopeptidase with thrombospondin type 1 motif, 18 |
| GO | metalloendopeptidase activity          | 6 | 102 | 0.989 | 4316 matrix metallopeptidase 7 (matrilysin, uterine)              |
| GO | metalloendopeptidase activity          | 6 | 102 | 0.989 | 56547 matrix metallopeptidase 26                                  |
| GO | metalloendopeptidase activity          | 6 | 102 | 0.989 | 7092 tolloid-like 1                                               |
| GO | metalloendopeptidase activity          | 6 | 102 | 0.989 | 8751 ADAM metallopeptidase domain 15                              |
| GO | metalloendopeptidase activity          | 6 | 102 | 0.989 | 9510 ADAM metallopeptidase with thrombospondin type 1 motif, 1    |
| GO | microtubule binding                    | 1 | 58  | 0.989 | 1785 dynamin 2                                                    |
| GO | motor activity                         | 3 | 64  | 0.989 | 1785 dynamin 2                                                    |
| GO | motor activity                         | 3 | 64  | 0.989 | 4645 myosin VB                                                    |
| GO | motor activity                         | 3 | 64  | 0.989 | 51168 myosin XVA                                                  |
| GO | post-Golgi vesicle-mediated transpor   | 2 | 37  | 0.989 | 1785 dynamin 2                                                    |
| GO | post-Golgi vesicle-mediated transpor   | 2 | 37  | 0.989 | 8673 vesicle-associated membrane protein 8 (endobrevin)           |
| GO | aminopeptidase activity                | 1 | 28  | 0.989 | 1803 dipeptidyl-peptidase 4                                       |
| GO | collagen binding                       | 2 | 34  | 0.989 | 1803 dipeptidyl-peptidase 4                                       |
| GO | collagen binding                       | 2 | 34  | 0.989 | 22795 nidogen 2 (osteonidogen)                                    |
| GO | response to cocaine                    | 1 | 16  | 0.989 | 1813 dopamine receptor D2                                         |
| GO | synapse assembly                       | 2 | 33  | 0.989 | 1813 dopamine receptor D2                                         |
| GO | synapse assembly                       | 2 | 33  | 0.989 | 375790 agrin                                                      |
| GO | regulation of neuron differentiation   | 1 | 19  | 0.989 | 1822 atrophin 1                                                   |
| GO | regulation of heart contraction        | 2 | 32  | 0.989 | 1839 heparin-binding EGF-like growth factor                       |
| GO | regulation of heart contraction        | 2 | 32  | 0.989 | 8912 calcium channel, voltage-dependent, T type, alpha 1H subunit |
| GO | inactivation of MAPK activity          | 1 | 20  | 0.989 | 1844 dual specificity phosphatase 2                               |
| GO | glucose transport                      | 1 | 22  | 0.989 | 1906 endothelin 1                                                 |
| GO | translation elongation factor activity | 1 | 20  | 0.989 | 1915 eukaryotic translation elongation factor 1 alpha 1           |
| GO | translational elongation               | 1 | 87  | 0.989 | 1915 eukaryotic translation elongation factor 1 alpha 1           |
| GO | T cell differentiation                 | 1 | 19  | 0.989 | 1958 early growth response 1                                      |
| GO | myelination                            | 1 | 29  | 0.989 | 1959 early growth response 2                                      |
| GO | vasculogenesis                         | 2 | 42  | 0.989 | 1969 EPH receptor A2                                              |
| GO | vasculogenesis                         | 2 | 42  | 0.989 | 3726 jun B proto-oncogene                                         |

|    |                                          |    |     |       |                                                                               |
|----|------------------------------------------|----|-----|-------|-------------------------------------------------------------------------------|
| GO | regulation of translational initiation   | 1  | 24  | 0.989 | 1983 eukaryotic translation initiation factor 5                               |
| GO | translation factor activity, nucleic aci | 1  | 21  | 0.989 | 1983 eukaryotic translation initiation factor 5                               |
| GO | translation initiation factor activity   | 1  | 49  | 0.989 | 1983 eukaryotic translation initiation factor 5                               |
| GO | translational initiation                 | 1  | 36  | 0.989 | 1983 eukaryotic translation initiation factor 5                               |
| GO | glycolysis                               | 1  | 41  | 0.989 | 2026 enolase 2 (gamma, neuronal)                                              |
| GO | synaptosome                              | 5  | 91  | 0.989 | 2026 enolase 2 (gamma, neuronal)                                              |
| GO | synaptosome                              | 5  | 91  | 0.989 | 2353 FBJ murine osteosarcoma viral oncogene homolog                           |
| GO | synaptosome                              | 5  | 91  | 0.989 | 3678 integrin, alpha 5 (fibronectin receptor, alpha polypeptide)              |
| GO | synaptosome                              | 5  | 91  | 0.989 | 4645 myosin VB                                                                |
| GO | synaptosome                              | 5  | 91  | 0.989 | 6622 synuclein, alpha (non A4 component of amyloid precursor)                 |
| GO | histone acetyltransferase activity       | 2  | 38  | 0.989 | 2033 E1A binding protein p300                                                 |
| GO | histone acetyltransferase activity       | 2  | 38  | 0.989 | 55140 elongation protein 3 homolog ( <i>S. cerevisiae</i> )                   |
| GO | histone H4 acetylation                   | 1  | 15  | 0.989 | 2033 E1A binding protein p300                                                 |
| GO | ceramide metabolic process               | 1  | 16  | 0.989 | 2055 ceroid-lipofuscinosis, neuronal 8 (epilepsy, progressive with mental ret |
| GO | ER-Golgi intermediate compartment        | 1  | 17  | 0.989 | 2055 ceroid-lipofuscinosis, neuronal 8 (epilepsy, progressive with mental ret |
| GO | lysosome organization                    | 1  | 22  | 0.989 | 2055 ceroid-lipofuscinosis, neuronal 8 (epilepsy, progressive with mental ret |
| GO | positive regulation of epithelial cell p | 2  | 34  | 0.989 | 2066 v-erb-a erythroblastic leukemia viral oncogene homolog 4 (avian)         |
| GO | positive regulation of epithelial cell p | 2  | 34  | 0.989 | 3479 insulin-like growth factor 1 (somatomedin C)                             |
| GO | mitochondrial outer membrane             | 5  | 81  | 0.989 | 2182 acyl-CoA synthetase long-chain family member 4                           |
| GO | mitochondrial outer membrane             | 5  | 81  | 0.989 | 4128 monoamine oxidase A                                                      |
| GO | mitochondrial outer membrane             | 5  | 81  | 0.989 | 4129 monoamine oxidase B                                                      |
| GO | mitochondrial outer membrane             | 5  | 81  | 0.989 | 4170 myeloid cell leukemia sequence 1 (BCL2-related)                          |
| GO | mitochondrial outer membrane             | 5  | 81  | 0.989 | 51703 acyl-CoA synthetase long-chain family member 5                          |
| GO | neuronal cell body                       | 10 | 148 | 0.989 | 2182 acyl-CoA synthetase long-chain family member 4                           |
| GO | neuronal cell body                       | 10 | 148 | 0.989 | 3759 potassium inwardly-rectifying channel, subfamily J, member 2             |
| GO | neuronal cell body                       | 10 | 148 | 0.989 | 429 achaete-scute complex homolog 1 ( <i>Drosophila</i> )                     |
| GO | neuronal cell body                       | 10 | 148 | 0.989 | 4645 myosin VB                                                                |
| GO | neuronal cell body                       | 10 | 148 | 0.989 | 4684 neural cell adhesion molecule 1                                          |
| GO | neuronal cell body                       | 10 | 148 | 0.989 | 4856 nephroblastoma overexpressed gene                                        |
| GO | neuronal cell body                       | 10 | 148 | 0.989 | 5025 purinergic receptor P2X, ligand-gated ion channel, 4                     |
| GO | neuronal cell body                       | 10 | 148 | 0.989 | 5122 proprotein convertase subtilisin/kexin type 1                            |
| GO | neuronal cell body                       | 10 | 148 | 0.989 | 6750 somatostatin                                                             |
| GO | neuronal cell body                       | 10 | 148 | 0.989 | 799 calcitonin receptor                                                       |
| GO | peroxisomal membrane                     | 1  | 41  | 0.989 | 2182 acyl-CoA synthetase long-chain family member 4                           |
| GO | peroxisome                               | 1  | 92  | 0.989 | 2182 acyl-CoA synthetase long-chain family member 4                           |
| GO | chromosome, centromeric region           | 1  | 47  | 0.989 | 220359 tigger transposable element derived 3                                  |



|    |                                        |   |     |       |                                                                             |
|----|----------------------------------------|---|-----|-------|-----------------------------------------------------------------------------|
| GO | fibroblast growth factor receptor sigr | 2 | 33  | 0.989 | 2263 fibroblast growth factor receptor 2                                    |
| GO | fibroblast growth factor receptor sigr | 2 | 33  | 0.989 | 26281 fibroblast growth factor 20                                           |
| GO | positive regulation of cell cycle      | 1 | 15  | 0.989 | 2290 forkhead box G1                                                        |
| GO | cell development                       | 1 | 15  | 0.989 | 2303 forkhead box C2 (MFH-1, mesenchyme forkhead 1)                         |
| GO | mesoderm development                   | 1 | 27  | 0.989 | 2303 forkhead box C2 (MFH-1, mesenchyme forkhead 1)                         |
| GO | microtubule associated complex         | 1 | 25  | 0.989 | 23095 kinesin family member 1B                                              |
| GO | protein C-terminus binding             | 9 | 146 | 0.989 | 23119 hypermethylated in cancer 2                                           |
| GO | protein C-terminus binding             | 9 | 146 | 0.989 | 26119 low density lipoprotein receptor adaptor protein 1                    |
| GO | protein C-terminus binding             | 9 | 146 | 0.989 | 4692 necdin homolog (mouse)                                                 |
| GO | protein C-terminus binding             | 9 | 146 | 0.989 | 6494 signal-induced proliferation-associated 1                              |
| GO | protein C-terminus binding             | 9 | 146 | 0.989 | 6521 solute carrier family 4, anion exchanger, member 1 (erythrocyte memb   |
| GO | protein C-terminus binding             | 9 | 146 | 0.989 | 774 calcium channel, voltage-dependent, N type, alpha 1B subunit            |
| GO | protein C-terminus binding             | 9 | 146 | 0.989 | 79661 nei endonuclease VIII-like 1 (E. coli)                                |
| GO | protein C-terminus binding             | 9 | 146 | 0.989 | 8938 BAI1-associated protein 3                                              |
| GO | protein C-terminus binding             | 9 | 146 | 0.989 | 9414 tight junction protein 2 (zona occludens 2)                            |
| GO | mitochondrial membrane                 | 1 | 51  | 0.989 | 23151 GRAM domain containing 4                                              |
| GO | protein kinase binding                 | 7 | 113 | 0.989 | 23303 kinesin family member 13B                                             |
| GO | protein kinase binding                 | 7 | 113 | 0.989 | 3689 integrin, beta 2 (complement component 3 receptor 3 and 4 subunit)     |
| GO | protein kinase binding                 | 7 | 113 | 0.989 | 5801 protein tyrosine phosphatase, receptor type, R                         |
| GO | protein kinase binding                 | 7 | 113 | 0.989 | 64127 nucleotide-binding oligomerization domain containing 2                |
| GO | protein kinase binding                 | 7 | 113 | 0.989 | 8313 axin 2                                                                 |
| GO | protein kinase binding                 | 7 | 113 | 0.989 | 8631 src kinase associated phosphoprotein 1                                 |
| GO | protein kinase binding                 | 7 | 113 | 0.989 | 8660 insulin receptor substrate 2                                           |
| GO | GTPase binding                         | 1 | 15  | 0.989 | 23348 dedicator of cytokinesis 9                                            |
| GO | G-protein-coupled receptor binding     | 1 | 24  | 0.989 | 23365 Rho guanine nucleotide exchange factor (GEF) 12                       |
| GO | chromatin assembly or disassembly      | 1 | 36  | 0.989 | 23492 chromobox homolog 7                                                   |
| GO | chromatin binding                      | 7 | 156 | 0.989 | 23492 chromobox homolog 7                                                   |
| GO | chromatin binding                      | 7 | 156 | 0.989 | 2737 GLI family zinc finger 3                                               |
| GO | chromatin binding                      | 7 | 156 | 0.989 | 4087 SMAD family member 2                                                   |
| GO | chromatin binding                      | 7 | 156 | 0.989 | 4286 microphthalmia-associated transcription factor                         |
| GO | chromatin binding                      | 7 | 156 | 0.989 | 604 B-cell CLL/lymphoma 6                                                   |
| GO | chromatin binding                      | 7 | 156 | 0.989 | 79987 sushi, von Willebrand factor type A, EGF and pentraxin domain contain |
| GO | chromatin binding                      | 7 | 156 | 0.989 | 9324 high mobility group nucleosomal binding domain 3                       |
| GO | chromatin                              | 4 | 81  | 0.989 | 23492 chromobox homolog 7                                                   |
| GO | chromatin                              | 4 | 81  | 0.989 | 3726 jun B proto-oncogene                                                   |
| GO | chromatin                              | 4 | 81  | 0.989 | 4613 v-myc myelocytomatosis viral related oncogene, neuroblastoma derive    |

|                                        |   |    |       |                                                                                |
|----------------------------------------|---|----|-------|--------------------------------------------------------------------------------|
| GO chromatin                           | 4 | 81 | 0.989 | 9324 high mobility group nucleosomal binding domain 3                          |
| GO single-stranded DNA binding         | 3 | 49 | 0.989 | 23648 single stranded DNA binding protein 3                                    |
| GO single-stranded DNA binding         | 3 | 49 | 0.989 | 80169 chromosome 17 open reading frame 68                                      |
| GO single-stranded DNA binding         | 3 | 49 | 0.989 | 8531 cold shock domain protein A                                               |
| GO protein binding, bridging           | 2 | 44 | 0.989 | 23767 fibronectin leucine rich transmembrane protein 3                         |
| GO protein binding, bridging           | 2 | 44 | 0.989 | 26119 low density lipoprotein receptor adaptor protein 1                       |
| GO nuclear matrix                      | 2 | 62 | 0.989 | 240 arachidonate 5-lipoxygenase                                                |
| GO nuclear matrix                      | 2 | 62 | 0.989 | 5371 promyelocytic leukemia                                                    |
| GO nuclear membrane                    | 5 | 87 | 0.989 | 240 arachidonate 5-lipoxygenase                                                |
| GO nuclear membrane                    | 5 | 87 | 0.989 | 28959 transmembrane protein 176B                                               |
| GO nuclear membrane                    | 5 | 87 | 0.989 | 358 aquaporin 1 (Colton blood group)                                           |
| GO nuclear membrane                    | 5 | 87 | 0.989 | 3601 interleukin 15 receptor, alpha                                            |
| GO nuclear membrane                    | 5 | 87 | 0.989 | 5371 promyelocytic leukemia                                                    |
| GO ubiquitin ligase complex            | 3 | 54 | 0.989 | 255488 ring finger protein 144B                                                |
| GO ubiquitin ligase complex            | 3 | 54 | 0.989 | 4008 LIM domain 7                                                              |
| GO ubiquitin ligase complex            | 3 | 54 | 0.989 | 79872 Cas-Br-M (murine) ecotropic retroviral transforming sequence-like 1      |
| GO late endosome                       | 2 | 43 | 0.989 | 255738 proprotein convertase subtilisin/kexin type 9                           |
| GO late endosome                       | 2 | 43 | 0.989 | 5873 RAB27A, member RAS oncogene family                                        |
| GO GABA-A receptor activity            | 1 | 19 | 0.989 | 2564 gamma-aminobutyric acid (GABA) A receptor, epsilon                        |
| GO gamma-aminobutyric acid signaling p | 1 | 20 | 0.989 | 2564 gamma-aminobutyric acid (GABA) A receptor, epsilon                        |
| GO pyridoxal phosphate binding         | 2 | 51 | 0.989 | 2571 glutamate decarboxylase 1 (brain, 67kDa)                                  |
| GO pyridoxal phosphate binding         | 2 | 51 | 0.989 | 55304 serine palmitoyltransferase, long chain base subunit 3                   |
| GO vesicle membrane                    | 1 | 15 | 0.989 | 2571 glutamate decarboxylase 1 (brain, 67kDa)                                  |
| GO manganese ion binding               | 1 | 32 | 0.989 | 2589 UDP-N-acetyl-alpha-D-galactosamine:polypeptide N-acetylgalactosami        |
| GO Rab GTPase binding                  | 2 | 33 | 0.989 | 259173 ALS2 C-terminal like                                                    |
| GO Rab GTPase binding                  | 2 | 33 | 0.989 | 4645 myosin VB                                                                 |
| GO isomerase activity                  | 4 | 99 | 0.989 | 26035 glucuronic acid epimerase                                                |
| GO isomerase activity                  | 4 | 99 | 0.989 | 51303 FK506 binding protein 11, 19 kDa                                         |
| GO isomerase activity                  | 4 | 99 | 0.989 | 6916 thromboxane A synthase 1 (platelet)                                       |
| GO isomerase activity                  | 4 | 99 | 0.989 | 81888 hydroxypyruvate isomerase homolog (E. coli)                              |
| GO generation of precursor metabolites | 3 | 55 | 0.989 | 2642 glucagon receptor                                                         |
| GO generation of precursor metabolites | 3 | 55 | 0.989 | 862 runt-related transcription factor 1; translocated to, 1 (cyclin D-related) |
| GO generation of precursor metabolites | 3 | 55 | 0.989 | 9481 solute carrier family 25, member 27                                       |
| GO peptide hormone binding             | 1 | 22 | 0.989 | 2642 glucagon receptor                                                         |
| GO electron transport chain            | 4 | 86 | 0.989 | 27035 NADPH oxidase 1                                                          |
| GO electron transport chain            | 4 | 86 | 0.989 | 55068 ecto-NOX disulfide-thiol exchanger 1                                     |

|    |                                        |   |     |       |                                                                           |
|----|----------------------------------------|---|-----|-------|---------------------------------------------------------------------------|
| GO | electron transport chain               | 4 | 86  | 0.989 | 56605 ERO1-like beta ( <i>S. cerevisiae</i> )                             |
| GO | electron transport chain               | 4 | 86  | 0.989 | 79152 fatty acid 2-hydroxylase                                            |
| GO | male genitalia development             | 1 | 17  | 0.989 | 2706 gap junction protein, beta 2, 26kDa                                  |
| GO | purine ribonucleoside monophospha      | 1 | 17  | 0.989 | 271 adenosine monophosphate deaminase 2                                   |
| GO | chemotaxis                             | 7 | 117 | 0.989 | 27202 G protein-coupled receptor 77                                       |
| GO | chemotaxis                             | 7 | 117 | 0.989 | 2921 chemokine (C-X-C motif) ligand 3                                     |
| GO | chemotaxis                             | 7 | 117 | 0.989 | 3491 cysteine-rich, angiogenic inducer, 61                                |
| GO | chemotaxis                             | 7 | 117 | 0.989 | 56477 chemokine (C-C motif) ligand 28                                     |
| GO | chemotaxis                             | 7 | 117 | 0.989 | 5724 platelet-activating factor receptor                                  |
| GO | chemotaxis                             | 7 | 117 | 0.989 | 6372 chemokine (C-X-C motif) ligand 6 (granulocyte chemotactic protein 2) |
| GO | chemotaxis                             | 7 | 117 | 0.989 | 6374 chemokine (C-X-C motif) ligand 5                                     |
| GO | neuron apoptosis                       | 1 | 16  | 0.989 | 27242 tumor necrosis factor receptor superfamily, member 21               |
| GO | anterior/posterior pattern formation   | 4 | 81  | 0.989 | 2737 GLI family zinc finger 3                                             |
| GO | anterior/posterior pattern formation   | 4 | 81  | 0.989 | 28996 homeodomain interacting protein kinase 2                            |
| GO | anterior/posterior pattern formation   | 4 | 81  | 0.989 | 4087 SMAD family member 2                                                 |
| GO | anterior/posterior pattern formation   | 4 | 81  | 0.989 | 7026 nuclear receptor subfamily 2, group F, member 2                      |
| GO | cilium                                 | 2 | 90  | 0.989 | 2737 GLI family zinc finger 3                                             |
| GO | cilium                                 | 2 | 90  | 0.989 | 5132 phosducin                                                            |
| GO | embryonic skeletal system morphoge     | 2 | 36  | 0.989 | 2737 GLI family zinc finger 3                                             |
| GO | embryonic skeletal system morphoge     | 2 | 36  | 0.989 | 57453 Down syndrome cell adhesion molecule like 1                         |
| GO | histone deacetylase binding            | 2 | 39  | 0.989 | 2737 GLI family zinc finger 3                                             |
| GO | histone deacetylase binding            | 2 | 39  | 0.989 | 9734 histone deacetylase 9                                                |
| GO | mediator complex                       | 1 | 31  | 0.989 | 2737 GLI family zinc finger 3                                             |
| GO | proximal/distal pattern formation      | 1 | 22  | 0.989 | 2737 GLI family zinc finger 3                                             |
| GO | DNA replication                        | 3 | 146 | 0.989 | 27434 polymerase (DNA directed), mu                                       |
| GO | DNA replication                        | 3 | 146 | 0.989 | 3479 insulin-like growth factor 1 (somatomedin C)                         |
| GO | DNA replication                        | 3 | 146 | 0.989 | 4784 nuclear factor I/X (CCAAT-binding transcription factor)              |
| GO | DNA-directed DNA polymerase activi     | 1 | 30  | 0.989 | 27434 polymerase (DNA directed), mu                                       |
| GO | guanyl nucleotide binding              | 1 | 17  | 0.989 | 2769 guanine nucleotide binding protein (G protein), alpha 15 (Gq class)  |
| GO | protein amino acid ADP-ribosylation    | 1 | 22  | 0.989 | 2769 guanine nucleotide binding protein (G protein), alpha 15 (Gq class)  |
| GO | cellular iron ion homeostasis          | 1 | 24  | 0.989 | 286133 scavenger receptor class A, member 5 (putative)                    |
| GO | induction of apoptosis by intracellula | 1 | 15  | 0.989 | 28996 homeodomain interacting protein kinase 2                            |
| GO | protein ubiquitination                 | 4 | 85  | 0.989 | 29116 myosin regulatory light chain interacting protein                   |
| GO | protein ubiquitination                 | 4 | 85  | 0.989 | 4008 LIM domain 7                                                         |
| GO | protein ubiquitination                 | 4 | 85  | 0.989 | 54876 DDB1 and CUL4 associated factor 16                                  |
| GO | protein ubiquitination                 | 4 | 85  | 0.989 | 79872 Cas-Br-M (murine) ecotropic retroviral transforming sequence-like 1 |

|    |                                                 |   |     |       |                                                                                          |
|----|-------------------------------------------------|---|-----|-------|------------------------------------------------------------------------------------------|
| GO | negative regulation of T cell proliferation     | 1 | 18  | 0.989 | 29126 CD274 molecule                                                                     |
| GO | glutathione transferase activity                | 1 | 17  | 0.989 | 2947 glutathione S-transferase mu 3 (brain)                                              |
| GO | biosynthetic process                            | 2 | 49  | 0.989 | 3034 histidine ammonia-lyase                                                             |
| GO | biosynthetic process                            | 2 | 49  | 0.989 | 55304 serine palmitoyltransferase, long chain base subunit 3                             |
| GO | cell division                                   | 6 | 246 | 0.989 | 311 annexin A11                                                                          |
| GO | cell division                                   | 6 | 246 | 0.989 | 3993 lethal giant larvae homolog 2 (Drosophila)                                          |
| GO | cell division                                   | 6 | 246 | 0.989 | 5218 cyclin-dependent kinase 14                                                          |
| GO | cell division                                   | 6 | 246 | 0.989 | 57132 chromatin modifying protein 1B                                                     |
| GO | cell division                                   | 6 | 246 | 0.989 | 8556 CDC14 cell division cycle 14 homolog A (S. cerevisiae)                              |
| GO | cell division                                   | 6 | 246 | 0.989 | 8900 cyclin A1                                                                           |
| GO | midbody                                         | 1 | 25  | 0.989 | 311 annexin A11                                                                          |
| GO | spindle                                         | 3 | 90  | 0.989 | 311 annexin A11                                                                          |
| GO | spindle                                         | 3 | 90  | 0.989 | 56288 par-3 partitioning defective 3 homolog (C. elegans)                                |
| GO | spindle                                         | 3 | 90  | 0.989 | 8556 CDC14 cell division cycle 14 homolog A (S. cerevisiae)                              |
| GO | MHC class I protein complex                     | 1 | 18  | 0.989 | 3134 major histocompatibility complex, class I, F                                        |
| GO | NAD or NADH binding                             | 1 | 37  | 0.989 | 316 aldehyde oxidase 1                                                                   |
| GO | positive regulation of mitotic cell cycle       | 1 | 16  | 0.989 | 3169 forkhead box A1                                                                     |
| GO | heterogeneous nuclear ribonucleoprotein complex | 1 | 15  | 0.989 | 3192 heterogeneous nuclear ribonucleoprotein U (scaffold attachment factor 1)            |
| GO | ribonucleoprotein complex                       | 1 | 95  | 0.989 | 3192 heterogeneous nuclear ribonucleoprotein U (scaffold attachment factor 1)            |
| GO | spliceosomal complex                            | 1 | 118 | 0.989 | 3192 heterogeneous nuclear ribonucleoprotein U (scaffold attachment factor 1)            |
| GO | steroid biosynthetic process                    | 1 | 30  | 0.989 | 3294 hydroxysteroid (17-beta) dehydrogenase 2                                            |
| GO | unfolded protein binding                        | 4 | 103 | 0.989 | 3306 heat shock 70kDa protein 2                                                          |
| GO | unfolded protein binding                        | 4 | 103 | 0.989 | 56605 ERO1-like beta (S. cerevisiae)                                                     |
| GO | unfolded protein binding                        | 4 | 103 | 0.989 | 84277 DnaJ (Hsp40) homolog, subfamily C, member 30                                       |
| GO | unfolded protein binding                        | 4 | 103 | 0.989 | 9804 translocase of outer mitochondrial membrane 20 homolog (yeast)                      |
| GO | G1/S transition of mitotic cell cycle           | 2 | 42  | 0.989 | 3400 inhibitor of DNA binding 4, dominant negative helix-loop-helix protein              |
| GO | G1/S transition of mitotic cell cycle           | 2 | 42  | 0.989 | 91 activin A receptor, type IB                                                           |
| GO | hippocampus development                         | 1 | 20  | 0.989 | 3400 inhibitor of DNA binding 4, dominant negative helix-loop-helix protein              |
| GO | lipid catabolic process                         | 5 | 90  | 0.989 | 340654 lipase, family member M                                                           |
| GO | lipid catabolic process                         | 5 | 90  | 0.989 | 5346 perilipin 1                                                                         |
| GO | lipid catabolic process                         | 5 | 90  | 0.989 | 57104 patatin-like phospholipase domain containing 2                                     |
| GO | lipid catabolic process                         | 5 | 90  | 0.989 | 7941 phospholipase A2, group VII (platelet-activating factor acetylhydrolase, cytosolic) |
| GO | lipid catabolic process                         | 5 | 90  | 0.989 | 79887 phospholipase B domain containing 1                                                |
| GO | activation of pro-apoptotic gene expression     | 1 | 22  | 0.989 | 3429 interferon, alpha-inducible protein 27                                              |
| GO | cilium axoneme                                  | 1 | 26  | 0.989 | 345895 radial spoke head 4 homolog A (Chlamydomonas)                                     |
| GO | phosphoinositide-mediated signaling             | 2 | 33  | 0.989 | 3479 insulin-like growth factor 1 (somatomedin C)                                        |

|                                             |   |     |       |                                                                               |
|---------------------------------------------|---|-----|-------|-------------------------------------------------------------------------------|
| GO phosphoinositide-mediated signaling      | 2 | 33  | 0.989 | 5724 platelet-activating factor receptor                                      |
| GO Ras protein signal transduction          | 4 | 64  | 0.989 | 3479 insulin-like growth factor 1 (somatomedin C)                             |
| GO Ras protein signal transduction          | 4 | 64  | 0.989 | 3845 v-Ki-ras2 Kirsten rat sarcoma viral oncogene homolog                     |
| GO Ras protein signal transduction          | 4 | 64  | 0.989 | 5900 ral guanine nucleotide dissociation stimulator                           |
| GO Ras protein signal transduction          | 4 | 64  | 0.989 | 6239 ras responsive element binding protein 1                                 |
| GO negative regulation of translation       | 1 | 18  | 0.989 | 3488 insulin-like growth factor binding protein 5                             |
| GO acyl-CoA binding                         | 1 | 15  | 0.989 | 35 acyl-Coenzyme A dehydrogenase, C-2 to C-3 short chain                      |
| GO fatty acid beta-oxidation                | 1 | 21  | 0.989 | 35 acyl-Coenzyme A dehydrogenase, C-2 to C-3 short chain                      |
| GO platelet activation                      | 1 | 24  | 0.989 | 3569 interleukin 6 (interferon, beta 2)                                       |
| GO positive regulation of T cell proliferat | 1 | 27  | 0.989 | 3569 interleukin 6 (interferon, beta 2)                                       |
| GO brush border                             | 1 | 22  | 0.989 | 358 aquaporin 1 (Colton blood group)                                          |
| GO cytokine receptor activity               | 1 | 17  | 0.989 | 3601 interleukin 15 receptor, alpha                                           |
| GO endosome membrane                        | 5 | 92  | 0.989 | 3643 insulin receptor                                                         |
| GO endosome membrane                        | 5 | 92  | 0.989 | 3665 interferon regulatory factor 7                                           |
| GO endosome membrane                        | 5 | 92  | 0.989 | 3949 low density lipoprotein receptor                                         |
| GO endosome membrane                        | 5 | 92  | 0.989 | 55275 vacuolar protein sorting 53 homolog ( <i>S. cerevisiae</i> )            |
| GO endosome membrane                        | 5 | 92  | 0.989 | 7098 toll-like receptor 3                                                     |
| GO negative regulation of gene expressic    | 1 | 23  | 0.989 | 3643 insulin receptor                                                         |
| GO response to activity                     | 1 | 18  | 0.989 | 3643 insulin receptor                                                         |
| GO response to tumor necrosis factor        | 1 | 17  | 0.989 | 3643 insulin receptor                                                         |
| GO sarcoplasmic reticulum membrane          | 1 | 17  | 0.989 | 3709 inositol 1,4,5-triphosphate receptor, type 2                             |
| GO nuclear chromatin                        | 1 | 16  | 0.989 | 3725 jun oncogene                                                             |
| GO nuclear chromosome                       | 1 | 23  | 0.989 | 3725 jun oncogene                                                             |
| GO structural constituent of cytoskeleton   | 2 | 73  | 0.989 | 375790 agrin                                                                  |
| GO structural constituent of cytoskeleton   | 2 | 73  | 0.989 | 6710 spectrin, beta, erythrocytic                                             |
| GO protein secretion                        | 1 | 16  | 0.989 | 379 ADP-ribosylation factor-like 4D                                           |
| GO intracellular membrane-bounded org       | 8 | 127 | 0.989 | 3790 potassium voltage-gated channel, delayed-rectifier, subfamily S, memb    |
| GO intracellular membrane-bounded org       | 8 | 127 | 0.989 | 3959 lectin, galactoside-binding, soluble, 3 binding protein                  |
| GO intracellular membrane-bounded org       | 8 | 127 | 0.989 | 4209 myocyte enhancer factor 2D                                               |
| GO intracellular membrane-bounded org       | 8 | 127 | 0.989 | 4582 mucin 1, cell surface associated                                         |
| GO intracellular membrane-bounded org       | 8 | 127 | 0.989 | 4794 nuclear factor of kappa light polypeptide gene enhancer in B-cells inhib |
| GO intracellular membrane-bounded org       | 8 | 127 | 0.989 | 54947 lysophosphatidylcholine acyltransferase 2                               |
| GO intracellular membrane-bounded org       | 8 | 127 | 0.989 | 7049 transforming growth factor, beta receptor III                            |
| GO intracellular membrane-bounded org       | 8 | 127 | 0.989 | 80763 chromosome 12 open reading frame 39                                     |
| GO transcription                            | 1 | 69  | 0.989 | 388558 zinc finger protein 808                                                |
| GO focal adhesion assembly                  | 1 | 15  | 0.989 | 3911 laminin, alpha 5                                                         |

|    |                                                  |   |     |       |                                                                                        |
|----|--------------------------------------------------|---|-----|-------|----------------------------------------------------------------------------------------|
| GO | coated pit                                       | 2 | 41  | 0.989 | 3949 low density lipoprotein receptor                                                  |
| GO | coated pit                                       | 2 | 41  | 0.989 | 9892 synaptosomal-associated protein, 91kDa homolog (mouse)                            |
| GO | actin filament                                   | 1 | 28  | 0.989 | 395 Rho GTPase activating protein 6                                                    |
| GO | regulation of GTPase activity                    | 1 | 16  | 0.989 | 395 Rho GTPase activating protein 6                                                    |
| GO | collagen                                         | 1 | 22  | 0.989 | 4015 lysyl oxidase                                                                     |
| GO | enzyme activator activity                        | 1 | 40  | 0.989 | 4056 leukotriene C4 synthase                                                           |
| GO | nuclear outer membrane                           | 1 | 20  | 0.989 | 4056 leukotriene C4 synthase                                                           |
| GO | gastrulation                                     | 1 | 15  | 0.989 | 4087 SMAD family member 2                                                              |
| GO | insulin secretion                                | 1 | 23  | 0.989 | 4087 SMAD family member 2                                                              |
| GO | protein N-terminus binding                       | 3 | 72  | 0.989 | 4204 methyl CpG binding protein 2 (Rett syndrome)                                      |
| GO | protein N-terminus binding                       | 3 | 72  | 0.989 | 4778 nuclear factor (erythroid-derived 2), 45kDa                                       |
| GO | protein N-terminus binding                       | 3 | 72  | 0.989 | 9143 synaptogyrin 3                                                                    |
| GO | cerebral cortex development                      | 1 | 16  | 0.989 | 429 achaete-scute complex homolog 1 (Drosophila)                                       |
| GO | muscle contraction                               | 6 | 97  | 0.989 | 4638 myosin light chain kinase                                                         |
| GO | muscle contraction                               | 6 | 97  | 0.989 | 6535 solute carrier family 6 (neurotransmitter transporter, creatine), member 1        |
| GO | muscle contraction                               | 6 | 97  | 0.989 | 7170 tropomyosin 3                                                                     |
| GO | muscle contraction                               | 6 | 97  | 0.989 | 8082 sarcospan (Kras oncogene-associated gene)                                         |
| GO | muscle contraction                               | 6 | 97  | 0.989 | 8736 myomesin 1, 185kDa                                                                |
| GO | muscle contraction                               | 6 | 97  | 0.989 | 8912 calcium channel, voltage-dependent, T type, alpha 1H subunit                      |
| GO | myosin complex                                   | 2 | 41  | 0.989 | 4645 myosin VB                                                                         |
| GO | myosin complex                                   | 2 | 41  | 0.989 | 51168 myosin XVA                                                                       |
| GO | regulation of protein localization               | 1 | 18  | 0.989 | 4645 myosin VB                                                                         |
| GO | centrosome                                       | 2 | 117 | 0.989 | 4692 necdin homolog (mouse)                                                            |
| GO | centrosome                                       | 2 | 117 | 0.989 | 55762 zinc finger protein 701                                                          |
| GO | neuron development                               | 1 | 27  | 0.989 | 4692 necdin homolog (mouse)                                                            |
| GO | 4 iron, 4 sulfur cluster binding                 | 1 | 25  | 0.989 | 48 aconitase 1, soluble                                                                |
| GO | tricarboxylic acid cycle                         | 1 | 21  | 0.989 | 48 aconitase 1, soluble                                                                |
| GO | hair follicle morphogenesis                      | 1 | 16  | 0.989 | 4851 Notch homolog 1, translocation-associated (Drosophila)                            |
| GO | cation transport                                 | 2 | 65  | 0.989 | 493 ATPase, Ca <sup>++</sup> transporting, plasma membrane 4                           |
| GO | cation transport                                 | 2 | 65  | 0.989 | 9914 ATPase, Ca <sup>++</sup> transporting, type 2C, member 2                          |
| GO | nucleotidyltransferase activity                  | 2 | 71  | 0.989 | 4939 2'-5'-oligoadenylate synthetase 2, 69/71kDa                                       |
| GO | nucleotidyltransferase activity                  | 2 | 71  | 0.989 | 9060 3'-phosphoadenosine 5'-phosphosulfate synthase 2                                  |
| GO | mitochondrial proton-transporting A <sup>+</sup> | 1 | 16  | 0.989 | 498 ATP synthase, H <sup>+</sup> transporting, mitochondrial F1 complex, alpha subunit |
| GO | endopeptidase activity                           | 1 | 15  | 0.989 | 5046 proprotein convertase subtilisin/kexin type 6                                     |
| GO | amino acid binding                               | 1 | 15  | 0.989 | 5053 phenylalanine hydroxylase                                                         |
| GO | cellular amino acid biosynthetic process         | 1 | 24  | 0.989 | 5053 phenylalanine hydroxylase                                                         |

|                                           |   |     |       |                                                                            |
|-------------------------------------------|---|-----|-------|----------------------------------------------------------------------------|
| GO cofactor binding                       | 1 | 19  | 0.989 | 5053 phenylalanine hydroxylase                                             |
| GO acid-amino acid ligase activity        | 2 | 34  | 0.989 | 5071 Parkinson disease (autosomal recessive, juvenile) 2, parkin           |
| GO acid-amino acid ligase activity        | 2 | 34  | 0.989 | 7706 tripartite motif-containing 25                                        |
| GO kinase binding                         | 1 | 27  | 0.989 | 5071 Parkinson disease (autosomal recessive, juvenile) 2, parkin           |
| GO neuron projection                      | 2 | 60  | 0.989 | 5071 Parkinson disease (autosomal recessive, juvenile) 2, parkin           |
| GO neuron projection                      | 2 | 60  | 0.989 | 6857 synaptotagmin I                                                       |
| GO protein polyubiquitination             | 1 | 25  | 0.989 | 5071 Parkinson disease (autosomal recessive, juvenile) 2, parkin           |
| GO chromosome                             | 2 | 135 | 0.989 | 50809 heterochromatin protein 1, binding protein 3                         |
| GO chromosome                             | 2 | 135 | 0.989 | 80169 chromosome 17 open reading frame 68                                  |
| GO nucleosome assembly                    | 1 | 65  | 0.989 | 50809 heterochromatin protein 1, binding protein 3                         |
| GO nucleosome                             | 1 | 52  | 0.989 | 50809 heterochromatin protein 1, binding protein 3                         |
| GO trans-Golgi network                    | 3 | 51  | 0.989 | 5122 proprotein convertase subtilisin/kexin type 1                         |
| GO trans-Golgi network                    | 3 | 51  | 0.989 | 64083 golgi phosphoprotein 3 (coat-protein)                                |
| GO trans-Golgi network                    | 3 | 51  | 0.989 | 9435 carbohydrate (N-acetylglucosamine-6-O) sulfotransferase 2             |
| GO SNAP receptor activity                 | 1 | 20  | 0.989 | 51272 blocked early in transport 1 homolog ( <i>S. cerevisiae</i> )-like   |
| GO peptidyl-prolyl cis-trans isomerase ac | 1 | 32  | 0.989 | 51303 FK506 binding protein 11, 19 kDa                                     |
| GO phototransduction                      | 1 | 21  | 0.989 | 5132 phosducin                                                             |
| GO calcium channel activity               | 3 | 44  | 0.989 | 53373 two pore segment channel 1                                           |
| GO calcium channel activity               | 3 | 44  | 0.989 | 783 calcium channel, voltage-dependent, beta 2 subunit                     |
| GO calcium channel activity               | 3 | 44  | 0.989 | 93589 calcium channel, voltage-dependent, alpha 2/delta subunit 4          |
| GO microtubule organizing center          | 4 | 96  | 0.989 | 53405 chloride intracellular channel 5                                     |
| GO microtubule organizing center          | 4 | 96  | 0.989 | 642273 family with sequence similarity 110, member C                       |
| GO microtubule organizing center          | 4 | 96  | 0.989 | 8556 CDC14 cell division cycle 14 homolog A ( <i>S. cerevisiae</i> )       |
| GO microtubule organizing center          | 4 | 96  | 0.989 | 90362 family with sequence similarity 110, member B                        |
| GO lactation                              | 1 | 28  | 0.989 | 5367 pro-melanin-concentrating hormone                                     |
| GO negative regulation of angiogenesis    | 1 | 28  | 0.989 | 5371 promyelocytic leukemia                                                |
| GO response to UV                         | 1 | 30  | 0.989 | 5371 promyelocytic leukemia                                                |
| GO sex differentiation                    | 1 | 23  | 0.989 | 54361 wingless-type MMTV integration site family, member 4                 |
| GO cis-Golgi network                      | 1 | 17  | 0.989 | 54463 family with sequence similarity 134, member B                        |
| GO methyltransferase activity             | 2 | 106 | 0.989 | 54904 Wolf-Hirschhorn syndrome candidate 1-like 1                          |
| GO methyltransferase activity             | 2 | 106 | 0.989 | 55870 ash1 (absent, small, or homeotic)-like ( <i>Drosophila</i> )         |
| GO N-acetyltransferase activity           | 1 | 20  | 0.989 | 55140 elongation protein 3 homolog ( <i>S. cerevisiae</i> )                |
| GO spindle pole                           | 2 | 50  | 0.989 | 55200 pleckstrin homology domain containing, family G (with RhoGef domain) |
| GO spindle pole                           | 2 | 50  | 0.989 | 642273 family with sequence similarity 110, member C                       |
| GO endoplasmic reticulum unfolded prot    | 1 | 20  | 0.989 | 55432 YOD1 OTU deubiquinating enzyme 1 homolog ( <i>S. cerevisiae</i> )    |
| GO ubiquitin-specific protease activity   | 1 | 28  | 0.989 | 55432 YOD1 OTU deubiquinating enzyme 1 homolog ( <i>S. cerevisiae</i> )    |

|    |                                        |   |     |       |                                                                             |
|----|----------------------------------------|---|-----|-------|-----------------------------------------------------------------------------|
| GO | ATP-dependent helicase activity        | 2 | 61  | 0.989 | 55601 DEAD (Asp-Glu-Ala-Asp) box polypeptide 60                             |
| GO | ATP-dependent helicase activity        | 2 | 61  | 0.989 | 8653 DEAD (Asp-Glu-Ala-Asp) box polypeptide 3, Y-linked                     |
| GO | helicase activity                      | 5 | 107 | 0.989 | 55601 DEAD (Asp-Glu-Ala-Asp) box polypeptide 60                             |
| GO | helicase activity                      | 5 | 107 | 0.989 | 64135 interferon induced with helicase C domain 1                           |
| GO | helicase activity                      | 5 | 107 | 0.989 | 79132 DEXH (Asp-Glu-X-His) box polypeptide 58                               |
| GO | helicase activity                      | 5 | 107 | 0.989 | 85441 peroxisomal proliferator-activated receptor A interacting complex 285 |
| GO | helicase activity                      | 5 | 107 | 0.989 | 8653 DEAD (Asp-Glu-Ala-Asp) box polypeptide 3, Y-linked                     |
| GO | filopodium                             | 1 | 25  | 0.989 | 55740 enabled homolog (Drosophila)                                          |
| GO | intracellular transport                | 1 | 17  | 0.989 | 55740 enabled homolog (Drosophila)                                          |
| GO | cAMP binding                           | 1 | 17  | 0.989 | 5577 protein kinase, cAMP-dependent, regulatory, type II, beta              |
| GO | cAMP-dependent protein kinase regu     | 1 | 16  | 0.989 | 5577 protein kinase, cAMP-dependent, regulatory, type II, beta              |
| GO | MAPKKK cascade                         | 1 | 31  | 0.989 | 55816 docking protein 5                                                     |
| GO | cytokinesis                            | 1 | 34  | 0.989 | 55909 bridging integrator 3                                                 |
| GO | cardiac muscle contraction             | 1 | 17  | 0.989 | 5608 mitogen-activated protein kinase kinase 6                              |
| GO | anaphase-promoting complex-depen       | 3 | 63  | 0.989 | 5696 proteasome (prosome, macropain) subunit, beta type, 8 (large multifur  |
| GO | anaphase-promoting complex-depen       | 3 | 63  | 0.989 | 5698 proteasome (prosome, macropain) subunit, beta type, 9 (large multifur  |
| GO | anaphase-promoting complex-depen       | 3 | 63  | 0.989 | 5699 proteasome (prosome, macropain) subunit, beta type, 10                 |
| GO | negative regulation of ubiquitin-prote | 3 | 62  | 0.989 | 5696 proteasome (prosome, macropain) subunit, beta type, 8 (large multifur  |
| GO | negative regulation of ubiquitin-prote | 3 | 62  | 0.989 | 5698 proteasome (prosome, macropain) subunit, beta type, 9 (large multifur  |
| GO | negative regulation of ubiquitin-prote | 3 | 62  | 0.989 | 5699 proteasome (prosome, macropain) subunit, beta type, 10                 |
| GO | positive regulation of ubiquitin-prote | 3 | 65  | 0.989 | 5696 proteasome (prosome, macropain) subunit, beta type, 8 (large multifur  |
| GO | positive regulation of ubiquitin-prote | 3 | 65  | 0.989 | 5698 proteasome (prosome, macropain) subunit, beta type, 9 (large multifur  |
| GO | positive regulation of ubiquitin-prote | 3 | 65  | 0.989 | 5699 proteasome (prosome, macropain) subunit, beta type, 10                 |
| GO | proteasome complex                     | 3 | 56  | 0.989 | 5696 proteasome (prosome, macropain) subunit, beta type, 8 (large multifur  |
| GO | proteasome complex                     | 3 | 56  | 0.989 | 5698 proteasome (prosome, macropain) subunit, beta type, 9 (large multifur  |
| GO | proteasome complex                     | 3 | 56  | 0.989 | 5699 proteasome (prosome, macropain) subunit, beta type, 10                 |
| GO | triglyceride lipase activity           | 1 | 16  | 0.989 | 57104 patatin-like phospholipase domain containing 2                        |
| GO | late endosome membrane                 | 1 | 51  | 0.989 | 57132 chromatin modifying protein 1B                                        |
| GO | protein amino acid N-linked glycosyla  | 1 | 15  | 0.989 | 57134 mannosidase, alpha, class 1C, member 1                                |
| GO | ARF guanyl-nucleotide exchange fact    | 1 | 17  | 0.989 | 57221 KIAA1244                                                              |
| GO | regulation of ARF protein signal trans | 1 | 16  | 0.989 | 57221 KIAA1244                                                              |
| GO | peroxidase activity                    | 1 | 17  | 0.989 | 5742 prostaglandin-endoperoxide synthase 1 (prostaglandin G/H synthase a    |
| GO | dephosphorylation                      | 1 | 21  | 0.989 | 5787 protein tyrosine phosphatase, receptor type, B                         |
| GO | embryonic skeletal system developm     | 1 | 23  | 0.989 | 5950 retinol binding protein 4, plasma                                      |
| GO | voltage-gated sodium channel activit   | 1 | 15  | 0.989 | 6330 sodium channel, voltage-gated, type IV, beta                           |
| GO | metal ion transmembrane transporte     | 1 | 16  | 0.989 | 64116 solute carrier family 39 (zinc transporter), member 8                 |



|                                            |   |    |       |                                                                                       |
|--------------------------------------------|---|----|-------|---------------------------------------------------------------------------------------|
| GO metal ion transport                     | 1 | 20 | 0.989 | 64116 solute carrier family 39 (zinc transporter), member 8                           |
| GO zinc ion transport                      | 1 | 24 | 0.989 | 64116 solute carrier family 39 (zinc transporter), member 8                           |
| GO defense response to bacterium           | 4 | 75 | 0.989 | 64127 nucleotide-binding oligomerization domain containing 2                          |
| GO defense response to bacterium           | 4 | 75 | 0.989 | 7098 toll-like receptor 3                                                             |
| GO defense response to bacterium           | 4 | 75 | 0.989 | 7099 toll-like receptor 4                                                             |
| GO defense response to bacterium           | 4 | 75 | 0.989 | 7100 toll-like receptor 5                                                             |
| GO positive regulation of protein ubiquit  | 1 | 25 | 0.989 | 64127 nucleotide-binding oligomerization domain containing 2                          |
| GO vesicle                                 | 1 | 17 | 0.989 | 64127 nucleotide-binding oligomerization domain containing 2                          |
| GO chemoattractant activity                | 1 | 15 | 0.989 | 652 bone morphogenetic protein 4                                                      |
| GO germ cell development                   | 1 | 22 | 0.989 | 652 bone morphogenetic protein 4                                                      |
| GO growth                                  | 1 | 29 | 0.989 | 652 bone morphogenetic protein 4                                                      |
| GO positive regulation of endothelial cell | 2 | 31 | 0.989 | 652 bone morphogenetic protein 4                                                      |
| GO positive regulation of endothelial cell | 2 | 31 | 0.989 | 7474 wingless-type MMTV integration site family, member 5A                            |
| GO neurotransmitter transport              | 1 | 40 | 0.989 | 6535 solute carrier family 6 (neurotransmitter transporter, creatine), membe          |
| GO amino acid transport                    | 1 | 46 | 0.989 | 6542 solute carrier family 7 (cationic amino acid transporter, $\gamma^+$ system), me |
| GO SWI/SNF complex                         | 1 | 15 | 0.989 | 6604 SWI/SNF related, matrix associated, actin dependent regulator of chrom           |
| GO growth cone                             | 3 | 58 | 0.989 | 6622 synuclein, alpha (non A4 component of amyloid precursor)                         |
| GO growth cone                             | 3 | 58 | 0.989 | 7170 tropomyosin 3                                                                    |
| GO growth cone                             | 3 | 58 | 0.989 | 81544 glycerophosphodiester phosphodiesterase domain containing 5                     |
| GO keratinization                          | 1 | 31 | 0.989 | 6706 small proline-rich protein 2G                                                    |
| GO vesicle docking involved in exocytosis  | 1 | 19 | 0.989 | 6812 syntaxin binding protein 1                                                       |
| GO mannose binding                         | 1 | 16 | 0.989 | 682 basigin (Ok blood group)                                                          |
| GO non-membrane spanning protein tyros     | 1 | 40 | 0.989 | 6850 spleen tyrosine kinase                                                           |
| GO endocytic vesicle membrane              | 1 | 22 | 0.989 | 6857 synaptotagmin I                                                                  |
| GO hydrogen peroxide catabolic process     | 1 | 16 | 0.989 | 7001 peroxiredoxin 2                                                                  |
| GO thymus development                      | 1 | 23 | 0.989 | 7001 peroxiredoxin 2                                                                  |
| GO response to zinc ion                    | 1 | 18 | 0.989 | 760 carbonic anhydrase II                                                             |
| GO C-C chemokine receptor activity         | 1 | 16 | 0.989 | 7852 chemokine (C-X-C motif) receptor 4                                               |
| GO cell leading edge                       | 1 | 17 | 0.989 | 7852 chemokine (C-X-C motif) receptor 4                                               |
| GO DNA fragmentation involved in apopt     | 1 | 18 | 0.989 | 79444 baculoviral IAP repeat-containing 7                                             |
| GO base-excision repair                    | 1 | 19 | 0.989 | 79661 nei endonuclease VIII-like 1 (E. coli)                                          |
| GO damaged DNA binding                     | 1 | 44 | 0.989 | 79661 nei endonuclease VIII-like 1 (E. coli)                                          |
| GO nucleotide-excision repair              | 1 | 26 | 0.989 | 79661 nei endonuclease VIII-like 1 (E. coli)                                          |
| GO iron ion transport                      | 1 | 22 | 0.989 | 79689 STEAP family member 4                                                           |
| GO flagellum                               | 1 | 19 | 0.989 | 79820 cation channel, sperm-associated, beta                                          |
| GO phospholipid transport                  | 1 | 18 | 0.989 | 79895 ATPase, class I, type 8B, member 4                                              |

|                                                     |   |     |       |                                                                                   |
|-----------------------------------------------------|---|-----|-------|-----------------------------------------------------------------------------------|
| GO nuclear chromosome, telomeric region             | 1 | 16  | 0.989 | 80169 chromosome 17 open reading frame 68                                         |
| GO telomere maintenance                             | 1 | 19  | 0.989 | 80169 chromosome 17 open reading frame 68                                         |
| GO cell adhesion molecule binding                   | 1 | 15  | 0.989 | 819 calcium modulating ligand                                                     |
| GO nucleoside metabolic process                     | 1 | 16  | 0.989 | 8382 non-metastatic cells 5, protein expressed in (nucleoside-diphosphate kinase) |
| GO nucleoside-triphosphatase activity               | 1 | 59  | 0.989 | 83858 ATPase family, AAA domain containing 3B                                     |
| GO protein serine/threonine phosphatase activity    | 1 | 37  | 0.989 | 84919 protein phosphatase 1, regulatory (inhibitor) subunit 15B                   |
| GO estrogen receptor binding                        | 1 | 15  | 0.989 | 85004 RAS-like, estrogen-regulated, growth inhibitor                              |
| GO diacylglycerol kinase activity                   | 1 | 15  | 0.989 | 8527 diacylglycerol kinase, delta 130kDa                                          |
| GO fertilization                                    | 1 | 17  | 0.989 | 8531 cold shock domain protein A                                                  |
| GO mRNA 3'-UTR binding                              | 1 | 17  | 0.989 | 8531 cold shock domain protein A                                                  |
| GO high-density lipoprotein particle                | 1 | 19  | 0.989 | 8542 apolipoprotein L, 1                                                          |
| GO very-low-density lipoprotein particle            | 1 | 19  | 0.989 | 8542 apolipoprotein L, 1                                                          |
| GO T cell receptor signaling pathway                | 1 | 22  | 0.989 | 8631 src kinase associated phosphoprotein 1                                       |
| GO endonuclease activity                            | 1 | 57  | 0.989 | 8635 ribonuclease T2                                                              |
| GO gastrulation with mouth forming secondary palate | 1 | 21  | 0.989 | 8646 chordin                                                                      |
| GO positive regulation of cell adhesion             | 1 | 20  | 0.989 | 8646 chordin                                                                      |
| GO cellular membrane fusion                         | 1 | 22  | 0.989 | 8673 vesicle-associated membrane protein 8 (endobrevin)                           |
| GO neuropeptide hormone activity                    | 1 | 21  | 0.989 | 885 cholecystokinin                                                               |
| GO mitosis                                          | 1 | 199 | 0.989 | 8900 cyclin A1                                                                    |
| GO MAP kinase kinase kinase activity                | 1 | 15  | 0.989 | 9064 mitogen-activated protein kinase kinase kinase 6                             |
| GO growth factor binding                            | 1 | 23  | 0.989 | 91 activin A receptor, type IB                                                    |
| GO peptidyl-threonine phosphorylation               | 1 | 18  | 0.989 | 91 activin A receptor, type IB                                                    |
| GO neuromuscular junction                           | 1 | 24  | 0.989 | 9143 synaptogyrin 3                                                               |
| GO endosome transport                               | 1 | 21  | 0.989 | 9182 Ras association (RalGDS/AF-6) domain family (N-terminal) member 9            |
| GO thyroid hormone receptor binding                 | 1 | 25  | 0.989 | 9324 high mobility group nucleosomal binding domain 3                             |
| GO RNA metabolic process                            | 1 | 19  | 0.989 | 94059 leukocyte receptor cluster (LRC) member 9                                   |
| GO N-acetylglucosamine metabolic process            | 1 | 15  | 0.989 | 9435 carbohydrate (N-acetylglucosamine-6-O) sulfotransferase 2                    |
| GO cholesterol binding                              | 1 | 18  | 0.989 | 9619 ATP-binding cassette, sub-family G (WHITE), member 1                         |
| GO cholesterol efflux                               | 1 | 19  | 0.989 | 9619 ATP-binding cassette, sub-family G (WHITE), member 1                         |
| GO reverse cholesterol transport                    | 1 | 15  | 0.989 | 9619 ATP-binding cassette, sub-family G (WHITE), member 1                         |
| GO histone methyltransferase complex                | 1 | 17  | 0.989 | 9734 histone deacetylase 9                                                        |
| GO phosphoprotein phosphatase inhibitor activity    | 1 | 18  | 0.989 | 9749 phosphatase and actin regulator 2                                            |
| GO protein targeting to mitochondrion               | 1 | 25  | 0.989 | 9804 translocase of outer mitochondrial membrane 20 homolog (yeast)               |
| GO regulation of endocytosis                        | 1 | 15  | 0.989 | 9892 synaptosomal-associated protein, 91kDa homolog (mouse)                       |
| GO male germ cell nucleus                           | 1 | 15  | 0.989 | 9985 REC8 homolog (yeast)                                                         |
| GO reciprocal meiotic recombination                 | 1 | 22  | 0.989 | 9985 REC8 homolog (yeast)                                                         |



ed, (semaphorin) 3D

nyltransferase 1 (GalNAc-T1)

a and mu polypeptides

er A1

) 3

t of Ra-reactive factor)

ed, (semaphorin) 3B  
, plasma)

ing 1

invertase)

1 domains), member 2  
unit A3

od group)



beta member 4

ific cross reacting antigen)

porter, system Xag), member 1  
brane protein band 3, Diego blood group)  
er 8  
mber 2  
p)

ut an intracellular domain

)

t of Ra-reactive factor)

, plasma)

od group)

ir A)











id (avian)

19/p100)

1

2 gamma)

itor, alpha

invertase)

sette sub-family C, member 7)

)

3 synthase)

ardation)

ed, (semaphorin) 3D

l group)

nyltransferase 1 (GalNAc-T1)

:osaminide alpha-2,6-sialyltransferase 4

beta member 4

nyltransferase-like 4

. subfamily N, member 4





:osaminide alpha-2,6-sialyltransferase 1

transferase, 1

porter, system Xag), member 1  
brane protein band 3, Diego blood group)  
er 8  
mber 2

ed, (semaphorin) 3B

nyltransferase 12 (GalNAc-T12)

ing 1

truncated death domain

od group)

i) member 3

i) member 7

i) member 6

M) and short cytoplasmic domain, (semaphorin 4D

sette sub-family C, member 7)

14)

3 synthase)

ardation)



l group)

nyltransferase 1 (GalNAc-T1)

:osaminide alpha-2,6-sialyltransferase 4

nyltransferase-like 4

. subfamily N, member 3

. subfamily N, member 4



:osaminide alpha-2,6-sialyltransferase 1

transferase, 1



nyltransferase 12 (GalNAc-T12)

ber 2

runcated death domain









itor, alpha





78 (mouse)  
fic cross reacting antigen)  
19/p100)



invertase)

truncated death domain  
with an intracellular domain

Unit A3

sette sub-family C, member 7)

beta member 4



. subfamily N, member 3

. subfamily N, member 4

er 3

it 1, cardiac muscle

er 8

ber 2

i) member 3

ii) member 7

iii) member 6

√ domains), member 2  
unit A3

TM) and short cytoplasmic domain, (semaphorin) 4D

14)

od group)



. subfamily N, member 3  
er 3

fic cross reacting antigen)

it 1, cardiac muscle

nd cyclooxygenase)

p)

ut an intracellular domain

)



er 3

ber 2

od group)

ific cross reacting antigen)

ut an intracellular domain

unit A3

ette sub-family C, member 7)

1 domains), member 2

TM) and short cytoplasmic domain, (semaphorin) 4D

α and μ polypeptides

sette sub-family C, member 7)

1

3



TM) and short cytoplasmic domain, (semaphorin) 4D

ed, (semaphorin) 3D

transferase, 1

ed, (semaphorin) 3B

inase)



M) and short cytoplasmic domain, (semaphorin) 4D

ing 1



19/p100)

sette sub-family C, member 7)

invertase)

er 3  
ber 2

itor, alpha

nd cyclooxygenase)  
d

invertase)

od group)



itor, alpha

invertase)

) 3

nd cyclooxygenase)

nd cyclooxygenase)

II phosphatase 2







transferase, 1

nd cyclooxygenase)







1 domains), member 2

ic cross reacting antigen)

2 gamma)

ed, (semaphorin) 3B

sette sub-family C, member 7)

invertase)









Il phosphatase 2





transferase, 1

unit A3



beta member 4

. subfamily N, member 4

itor, zeta

, plasma)

:osaminide alpha-2,6-sialyltransferase 4

:osaminide alpha-2,6-sialyltransferase 1

2 gamma)

78 (mouse)

invertase)

sette sub-family C, member 7)







ardation)

nd cyclooxygenase)



d

invertase)

matin, subfamily d, member 3





ardation)

i) member 3



i) member 7

i) member 6

invertase)



sette sub-family C, member 7)

itor, alpha  
itor, epsilon  
itor-like 1

nd cyclooxygenase)

l-acetylneuraminate monooxygenase) pseudogene

ber 2

nd cyclooxygenase)



sette sub-family C, member 7)

a

a



Unit A3

a

subfamily N, member 4

itor, alpha

itor, alpha

itor, alpha

nd cyclooxygenase)

) 3

78 (mouse)

t of Ra-reactive factor)

nctional peptidase 7)

nctional peptidase 2)

nvertase)

nyltransferase 1 (GalNAc-T1)  
nyltransferase-like 4

nyltransferase 12 (GalNAc-T12)

sette sub-family C, member 7)

a









beta member 4

or A)

er 3

78 (mouse)  
:d (avian)

19/p100)  
)itor, alpha  
)itor, epsilon  
)itor-like 1

it 1, cardiac muscle

t of Ra-reactive factor)  
nctional peptidase 7)

porter, system Xag), member 1

brane protein band 3, Diego blood group)

matin, subfamily d, member 3

d

)

2 gamma)



invertase)

inase)

runcated death domain



itor, alpha

invertase)

uncated death domain  
ut an intracellular domain

nd cyclooxygenase)

brane protein band 3, Diego blood group)

3 synthase)  
l group)

:osaminide alpha-2,6-sialyltransferase 4

:osaminide alpha-2,6-sialyltransferase 1

truncated death domain  
with an intracellular domain

itor, alpha

invertase)





t of Ra-reactive factor)



t of Ra-reactive factor)

transferrin receptor protein band 3, Diego blood group)

a

transferrin receptor, alpha

transferrin receptor, subfamily d, member 3

d  
ardation)

itor, alpha

3 synthase)

:osaminide alpha-2,6-sialyltransferase 4

nyltransferase-like 4

:osaminide alpha-2,6-sialyltransferase 1

nyltransferase 12 (GalNAc-T12)

1 domains), member 2

M) and short cytoplasmic domain, (semaphorin) 4D

ed, (semaphorin) 3D





ed, (semaphorin) 3B

od group)



t of Ra-reactive factor)

invertase)

prane protein band 3, Diego blood group)

it 1, cardiac muscle

matin, subfamily d, member 3

ardation)

p)

3

Director, alpha





TM) and short cytoplasmic domain, (semaphorin) 4D

ceptor, alpha

inase)  
runcated death domain

inase)

3

beta member 4

. subfamily N, member 4

:osaminide alpha-2,6-sialyltransferase 4

:osaminide alpha-2,6-sialyltransferase 1

invertase)  
nctional peptidase 7)  
nctional peptidase 2)

3 synthase)

sette sub-family C, member 7)

sette sub-family C, member 7)

3 synthase)

:osaminide alpha-2,6-sialyltransferase 4





:osaminide alpha-2,6-sialyltransferase 1

t of Ra-reactive factor)  
transferase, 1

sporter, system Xag), member 1

er 8

er 8

er 8



l-acetylneuraminate monooxygenase) pseudogene

)  
)

invertase)

it 1, cardiac muscle

e)  
nd cyclooxygenase)

, plasma)

sette sub-family C, member 7)

nd cyclooxygenase)

l-acetylneuraminate monooxygenase) pseudogene

ber 2

itor, alpha







sette sub-family C, member 7)

p)

ardation)

78 (mouse)



a and mu polypeptides

e)

it 1, cardiac muscle

sette sub-family C, member 7)

beta member 4

. subfamily N, member 3

. subfamily N, member 4



) 3

t of Ra-reactive factor)

d

ing 1

ardation)

TM) and short cytoplasmic domain, (semaphorin) 4D

ed, (semaphorin) 3D

transferase, 1

sette sub-family C, member 7)

sette sub-family C, member 7)

nd cyclooxygenase)

e)





ardation)

er A1

nd cyclooxygenase)



ed, (semaphorin) 3B

ardation)

)

i) member 6

a

, plasma)

)

invertase)

nyltransferase 1 (GalNAc-T1)  
nyltransferase-like 4  
nyltransferase 12 (GalNAc-T12)

od group)

ardation)

l group)

beta member 4

inase)

inase)

inase)

.dogene)

3 synthase)  
d group)

nyltransferase 1 (GalNAc-T1)

:osaminide alpha-2,6-sialyltransferase 4

nyltransferase-like 4  
er 3

itor, epsilon



:osaminide alpha-2,6-sialyltransferase 1

nd cyclooxygenase)

nyltransferase 12 (GalNAc-T12)

sette sub-family C, member 7)  
sette sub-family C, member 7)

3



3 synthase)

:ardation)

:ardation)

:ardation)

:osaminide alpha-2,6-sialyltransferase 4



19/p100)  
19/p100)  
itor, alpha  
itor, epsilon

nd cyclooxygenase)  
nd cyclooxygenase)  
nd cyclooxygenase)

p)

1

invertase)



sette sub-family C, member 7)

nyltransferase 1 (GalNAc-T1)

19/p100)

. subfamily N, member 4

78 (mouse)

1 domains), member 2

prane protein band 3, Diego blood group)

nd cyclooxygenase)

inase)

beta member 4

. subfamily N, member 3  
. subfamily N, member 4

er 3

ber 2

78 (mouse)

ardation)

t of Ra-reactive factor)



.dogene)

.subfamily N, member 3

.subfamily N, member 4

invertase)



transferase, 1

beta member 4

porter, system Xag), member 1

nd cyclooxygenase)

nctional peptidase 7)  
nctional peptidase 2)

ardation)

beta member 4

subfamily N, member 4

itor, alpha

d (avian)

matin, subfamily d, member 3

d

)

2 gamma)







ardation)

d group)

nyltransferase 1 (GalNAc-T1)  
nyltransferase 1 (GalNAc-T1)

.subfamily N, member 3

›itor, alpha  
›itor, alpha

nd cyclooxygenase)

porter, system Xag), member 1

brane protein band 3, Diego blood group)  
mber 2

invertase)

M) and short cytoplasmic domain, (semaphorin) 4D

matin, subfamily d, member 3

sette sub-family C, member 7)

brane protein band 3, Diego blood group)

prane protein band 3, Diego blood group)

ardation)





matin, subfamily d, member 3

it 1, cardiac muscle

nd cyclooxygenase)

3 synthase)  
l group)

nyltransferase 1 (GalNAc-T1)  
nyltransferase-like 4

transferase, 1

nyltransferase 12 (GalNAc-T12)

nd cyclooxygenase)  
ardation)

nctional peptidase 7)  
nctional peptidase 2)

nd cyclooxygenase)

II phosphatase 2



14)

porter, system Xag), member 1  
er 8

)

II phosphatase 2

а

а





. subfamily N, member 4

itor, alpha  
itor, alpha

it 1, cardiac muscle  
it 1, cardiac muscle

porter, system Xag), member 1

brane protein band 3, Diego blood group)  
p)



beta member 4

it 1, cardiac muscle

it 1, cardiac muscle

nd cyclooxygenase)

brane protein band 3, Diego blood group)

l group)

nyltransferase 1 (GalNAc-T1)

itor, alpha



invertase)

ardation)

itor, alpha

nctional peptidase 7)  
nctional peptidase 2)

)

unit A3

) 3

it 1, cardiac muscle

sette sub-family C, member 7)

3

ardation)

or A)

or A)

or A)

19/p100)  
itor, alpha

brane protein band 3, Diego blood group)  
brane protein band 3, Diego blood group)

, plasma)

)

TM) and short cytoplasmic domain, (semaphorin) 4D



it 1, cardiac muscle

1 domains), member 2  
unit A3

unit A3

it 1, cardiac muscle

sette sub-family C, member 7)

brane protein band 3, Diego blood group)



spouter, system Xag), member 1

itor, alpha

invertase)

l-acetylneuraminate monooxygenase) pseudogene

e)

)

ardation)

invertase)

a

19/p100)

matin, subfamily d, member 3

unit A3

brane protein band 3, Diego blood group)



ette sub-family C, member 7)

a

3 synthase)

ardation)

ardation)



itor, alpha

) 3

t of Ra-reactive factor)

p)

ber 2

Myoglobin, alpha

Myoglobin, cardiac muscle

Myoglobin, cardiac muscle

Myoglobin (transmembrane protein band 3, Diego blood group)

a

ardation)

ette sub-family C, member 7)

invertase)



ardation)

ardation)

porter, system Xag), member 1  
brane protein band 3, Diego blood group)  
matin, subfamily d, member 3











itor, alpha  
itor, alpha

sporter, system Xag), member 1

sette sub-family C, member 7)

nd cyclooxygenase)

sette sub-family C, member 7)

ardation)

sette sub-family C, member 7)



porter, system Xag), member 1  
er 8  
mber 2  
p)

mber 2

nyltransferase 1 (GalNAc-T1)

itor, epsilon

TM) and short cytoplasmic domain, (semaphorin) 4D

ardation)  
ed, (semaphorin) 3D

matin, subfamily d, member 3

ardation)

it 1, cardiac muscle

porter, system Xag), member 1

matin, subfamily d, member 3



or A)

id (avian)

2 gamma)



1

1 group)

e)

sette sub-family C, member 7)

14)

er 3

mber 2

ber 2

)

nd cyclooxygenase)

a

itor, alpha

porter, system Xag), member 1



ardation)

beta member 4

. subfamily N, member 4

er 3

er 3

matin, subfamily d, member 3



matin, subfamily d, member 3

it 1, cardiac muscle

matin, subfamily d, member 3

nctional peptidase 2)

it 1, cardiac muscle

a

beta member 4

ber 2

matin, subfamily d, member 3

sette sub-family C, member 7)





er A)

er 3



78 (mouse)

19/p100)  
itor, alpha  
itor, epsilon

i) member 6

nctional peptidase 7)  
nctional peptidase 2)

nd cyclooxygenase)



ing 1

invertase)

l-acetylneuraminate monooxygenase) pseudogene

ber 2

ndogene)

II phosphatase 2

sette sub-family C, member 7)

e)

, plasma)

Il phosphatase 2

a





:osaminide alpha-2,6-sialyltransferase 4

ir A)

id (avian)

19/p100)

itor, alpha

itor, epsilon

nctional peptidase 7)

nctional peptidase 2)

nd cyclooxygenase)

itor, zeta

matin, subfamily d, member 3

d

)

2 gamma)

invertase)



ηitor, zeta

)



3

or A)



II phosphatase 2

od group)

:osaminide alpha-2,6-sialyltransferase 4



inase)

a

78 (mouse)

itor, alpha



i) member 6

sette sub-family C, member 7)

or A)



it 1, cardiac muscle

inase)



∅ domains), member 2

l group)

porter, system Xag), member 1  
mber 2

)

unit A3  
unit A3

it 1, cardiac muscle

3  
r A)

itor, epsilon

]

matin, subfamily d, member 3  
)

a

or A)

or A)



ed, (semaphorin) 3B

l-acetylneuraminate monooxygenase) pseudogene

er 8

sette sub-family C, member 7)

а

or A)

78 (mouse)

it 1, cardiac muscle



sette sub-family C, member 7)

it 1, cardiac muscle

sette sub-family C, member 7)  
sette sub-family C, member 7)

sette sub-family C, member 7)  
sette sub-family C, member 7)

ᶶ  
ᶶ  
ᶶ  
ᶶ  
ᶶ  
ᶶ



itor, alpha







it 1, cardiac muscle

itor, alpha



it 1, cardiac muscle

inase)







ardation)  
ardation)  
ardation)

prane protein band 3, Diego blood group)

ing 1

id (avian)

nyltransferase 1 (GalNAc-T1)



r A)  
r A)  
r A)

, plasma)

er 3

itor, epsilon

er 8

it 1, cardiac muscle



i) member 6

nctional peptidase 7)  
nctional peptidase 2)

nd cyclooxygenase)

er 8  
mber 2  
matin, subfamily d, member 3

inase)
