# Supplementary material
Source: PubMed Central journal article supplement (PMC4070715)
Supplement: NIHMS587873-supplement-Supplement_4.pdf [file NIHMS587873-supplement-Supplement_4.pdf]

| Category | Term                                     | Count | Count i | P-value | Gene  | Title                                                                    |
|----------|------------------------------------------|-------|---------|---------|-------|--------------------------------------------------------------------------|
| GO       | heart development                        | 16    | 114     | 7E-05   | 10512 | sema domain, immunoglobulin domain (Ig), short basic domain, secreted, ( |
| GO       | heart development                        | 16    | 114     | 7E-05   | 1136  | cholinergic receptor, nicotinic, alpha 3                                 |
| GO       | heart development                        | 16    | 114     | 7E-05   | 2736  | GLI family zinc finger 2                                                 |
| GO       | heart development                        | 16    | 114     | 7E-05   | 4763  | neurofibromin 1                                                          |
| GO       | heart development                        | 16    | 114     | 7E-05   | 5021  | oxytocin receptor                                                        |
| GO       | heart development                        | 16    | 114     | 7E-05   | 5125  | proprotein convertase subtilisin/kexin type 5                            |
| GO       | heart development                        | 16    | 114     | 7E-05   | 55803 | ArfGAP with dual PH domains 2                                            |
| GO       | heart development                        | 16    | 114     | 7E-05   | 5795  | protein tyrosine phosphatase, receptor type, J                           |
| GO       | heart development                        | 16    | 114     | 7E-05   | 6299  | sal-like 1 (Drosophila)                                                  |
| GO       | heart development                        | 16    | 114     | 7E-05   | 6474  | short stature homeobox 2                                                 |
| GO       | heart development                        | 16    | 114     | 7E-05   | 6659  | SRY (sex determining region Y)-box 4                                     |
| GO       | heart development                        | 16    | 114     | 7E-05   | 6662  | SRY (sex determining region Y)-box 9                                     |
| GO       | heart development                        | 16    | 114     | 7E-05   | 6899  | T-box 1                                                                  |
| GO       | heart development                        | 16    | 114     | 7E-05   | 7046  | transforming growth factor, beta receptor 1                              |
| GO       | heart development                        | 16    | 114     | 7E-05   | 7137  | troponin I type 3 (cardiac)                                              |
| GO       | heart development                        | 16    | 114     | 7E-05   | 7490  | Wilms tumor 1                                                            |
| GO       | maternal process involved in parturition | 3     | 3       | 1E-04   | 1543  | cytochrome P450, family 1, subfamily A, polypeptide 1                    |
| GO       | maternal process involved in parturition | 3     | 3       | 1E-04   | 5021  | oxytocin receptor                                                        |
| GO       | maternal process involved in parturition | 3     | 3       | 1E-04   | 6347  | chemokine (C-C motif) ligand 2                                           |
| GO       | cytoplasm                                | 247   | 4355    | 2E-04   | 10000 | v-akt murine thymoma viral oncogene homolog 3 (protein kinase B, gamma   |
| GO       | cytoplasm                                | 247   | 4355    | 2E-04   | 1E+08 | forkhead box O6                                                          |
| GO       | cytoplasm                                | 247   | 4355    | 2E-04   | 10051 | structural maintenance of chromosomes 4                                  |
| GO       | cytoplasm                                | 247   | 4355    | 2E-04   | 10056 | phenylalanyl-tRNA synthetase, beta subunit                               |
| GO       | cytoplasm                                | 247   | 4355    | 2E-04   | 10096 | ARP3 actin-related protein 3 homolog (yeast)                             |
| GO       | cytoplasm                                | 247   | 4355    | 2E-04   | 10097 | ARP2 actin-related protein 2 homolog (yeast)                             |
| GO       | cytoplasm                                | 247   | 4355    | 2E-04   | 10189 | THO complex 4                                                            |
| GO       | cytoplasm                                | 247   | 4355    | 2E-04   | 10202 | dehydrogenase/reductase (SDR family) member 2                            |
| GO       | cytoplasm                                | 247   | 4355    | 2E-04   | 10254 | signal transducing adaptor molecule (SH3 domain and ITAM motif) 2        |
| GO       | cytoplasm                                | 247   | 4355    | 2E-04   | 1026  | cyclin-dependent kinase inhibitor 1A (p21, Cip1)                         |
| GO       | cytoplasm                                | 247   | 4355    | 2E-04   | 10293 | TRAF interacting protein                                                 |
| GO       | cytoplasm                                | 247   | 4355    | 2E-04   | 10391 | coronin, actin binding protein, 2B                                       |
| GO       | cytoplasm                                | 247   | 4355    | 2E-04   | 10395 | deleted in liver cancer 1                                                |
| GO       | cytoplasm                                | 247   | 4355    | 2E-04   | 10465 | peptidylprolyl isomerase H (cyclophilin H)                               |
| GO       | cytoplasm                                | 247   | 4355    | 2E-04   | 10492 | synaptotagmin binding, cytoplasmic RNA interacting protein               |
| GO       | cytoplasm                                | 247   | 4355    | 2E-04   | 10539 | glutaredoxin 3                                                           |

|    |           |     |      |       |                                                                           |
|----|-----------|-----|------|-------|---------------------------------------------------------------------------|
| GO | cytoplasm | 247 | 4355 | 2E-04 | 10612 tripartite motif-containing 3                                       |
| GO | cytoplasm | 247 | 4355 | 2E-04 | 10656 KH domain containing, RNA binding, signal transduction associated 3 |
| GO | cytoplasm | 247 | 4355 | 2E-04 | 10777 cyclic AMP-regulated phosphoprotein, 21 kD                          |
| GO | cytoplasm | 247 | 4355 | 2E-04 | 10785 WD repeat domain 4                                                  |
| GO | cytoplasm | 247 | 4355 | 2E-04 | 10808 heat shock 105kDa/110kDa protein 1                                  |
| GO | cytoplasm | 247 | 4355 | 2E-04 | 11169 WD repeat and HMG-box DNA binding protein 1                         |
| GO | cytoplasm | 247 | 4355 | 2E-04 | 11259 filamin A interacting protein 1-like                                |
| GO | cytoplasm | 247 | 4355 | 2E-04 | 113130 cell division cycle associated 5                                   |
| GO | cytoplasm | 247 | 4355 | 2E-04 | 114088 tripartite motif-containing 9                                      |
| GO | cytoplasm | 247 | 4355 | 2E-04 | 114757 cytoglobin                                                         |
| GO | cytoplasm | 247 | 4355 | 2E-04 | 116362 retinol binding protein 7, cellular                                |
| GO | cytoplasm | 247 | 4355 | 2E-04 | 118788 phosphoinositide-3-kinase adaptor protein 1                        |
| GO | cytoplasm | 247 | 4355 | 2E-04 | 121268 Ras homolog enriched in brain like 1                               |
| GO | cytoplasm | 247 | 4355 | 2E-04 | 122786 FERM domain containing 6                                           |
| GO | cytoplasm | 247 | 4355 | 2E-04 | 124540 musashi homolog 2 (Drosophila)                                     |
| GO | cytoplasm | 247 | 4355 | 2E-04 | 128853 dual specificity phosphatase 15                                    |
| GO | cytoplasm | 247 | 4355 | 2E-04 | 132158 glycerate kinase                                                   |
| GO | cytoplasm | 247 | 4355 | 2E-04 | 132625 zinc finger protein 42 homolog (mouse)                             |
| GO | cytoplasm | 247 | 4355 | 2E-04 | 132671 spermatogenesis associated 18 homolog (rat)                        |
| GO | cytoplasm | 247 | 4355 | 2E-04 | 132851 spermatogenesis associated 4                                       |
| GO | cytoplasm | 247 | 4355 | 2E-04 | 135114 histidine triad nucleotide binding protein 3                       |
| GO | cytoplasm | 247 | 4355 | 2E-04 | 1379 complement component (3b/4b) receptor 1-like                         |
| GO | cytoplasm | 247 | 4355 | 2E-04 | 1496 catenin (cadherin-associated protein), alpha 2                       |
| GO | cytoplasm | 247 | 4355 | 2E-04 | 150684 copper metabolism (Murr1) domain containing 1                      |
| GO | cytoplasm | 247 | 4355 | 2E-04 | 1543 cytochrome P450, family 1, subfamily A, polypeptide 1                |
| GO | cytoplasm | 247 | 4355 | 2E-04 | 158 adenylosuccinate lyase                                                |
| GO | cytoplasm | 247 | 4355 | 2E-04 | 166336 prickle homolog 2 (Drosophila)                                     |
| GO | cytoplasm | 247 | 4355 | 2E-04 | 1716 deoxyguanosine kinase                                                |
| GO | cytoplasm | 247 | 4355 | 2E-04 | 1730 diaphanous homolog 2 (Drosophila)                                    |
| GO | cytoplasm | 247 | 4355 | 2E-04 | 1781 dynein, cytoplasmic 1, intermediate chain 2                          |
| GO | cytoplasm | 247 | 4355 | 2E-04 | 1788 DNA (cytosine-5-)-methyltransferase 3 alpha                          |
| GO | cytoplasm | 247 | 4355 | 2E-04 | 1983 eukaryotic translation initiation factor 5                           |
| GO | cytoplasm | 247 | 4355 | 2E-04 | 1984 eukaryotic translation initiation factor 5A                          |
| GO | cytoplasm | 247 | 4355 | 2E-04 | 201299 RAD52 motif 1                                                      |
| GO | cytoplasm | 247 | 4355 | 2E-04 | 2027 enolase 3 (beta, muscle)                                             |
| GO | cytoplasm | 247 | 4355 | 2E-04 | 203 adenylylate kinase 1                                                  |

|    |           |     |      |       |                                                                                   |
|----|-----------|-----|------|-------|-----------------------------------------------------------------------------------|
| GO | cytoplasm | 247 | 4355 | 2E-04 | 2037 erythrocyte membrane protein band 4.1-like 2                                 |
| GO | cytoplasm | 247 | 4355 | 2E-04 | 2139 eyes absent homolog 2 (Drosophila)                                           |
| GO | cytoplasm | 247 | 4355 | 2E-04 | 2171 fatty acid binding protein 5 (psoriasis-associated)                          |
| GO | cytoplasm | 247 | 4355 | 2E-04 | 2172 fatty acid binding protein 6, ileal                                          |
| GO | cytoplasm | 247 | 4355 | 2E-04 | 219736 storkhead box 1                                                            |
| GO | cytoplasm | 247 | 4355 | 2E-04 | 220 aldehyde dehydrogenase 1 family, member A3                                    |
| GO | cytoplasm | 247 | 4355 | 2E-04 | 220042 chromosome 11 open reading frame 82                                        |
| GO | cytoplasm | 247 | 4355 | 2E-04 | 220134 spindle and kinetochore associated complex subunit 1                       |
| GO | cytoplasm | 247 | 4355 | 2E-04 | 221357 glutathione S-transferase alpha 5                                          |
| GO | cytoplasm | 247 | 4355 | 2E-04 | 2273 four and a half LIM domains 1                                                |
| GO | cytoplasm | 247 | 4355 | 2E-04 | 2281 FK506 binding protein 1B, 12.6 kDa                                           |
| GO | cytoplasm | 247 | 4355 | 2E-04 | 23057 nicotinamide nucleotide adenyltransferase 2                                 |
| GO | cytoplasm | 247 | 4355 | 2E-04 | 23136 erythrocyte membrane protein band 4.1-like 3                                |
| GO | cytoplasm | 247 | 4355 | 2E-04 | 23138 Nedd4 binding protein 3                                                     |
| GO | cytoplasm | 247 | 4355 | 2E-04 | 23157 septin 6                                                                    |
| GO | cytoplasm | 247 | 4355 | 2E-04 | 23171 glycerol-3-phosphate dehydrogenase 1-like                                   |
| GO | cytoplasm | 247 | 4355 | 2E-04 | 23189 KN motif and ankyrin repeat domains 1                                       |
| GO | cytoplasm | 247 | 4355 | 2E-04 | 2321 fms-related tyrosine kinase 1 (vascular endothelial growth factor/vascular p |
| GO | cytoplasm | 247 | 4355 | 2E-04 | 2533 FYN binding protein (FYB-120/130)                                            |
| GO | cytoplasm | 247 | 4355 | 2E-04 | 254528 chromosome 16 open reading frame 73                                        |
| GO | cytoplasm | 247 | 4355 | 2E-04 | 25758 chromosome 11 open reading frame 41                                         |
| GO | cytoplasm | 247 | 4355 | 2E-04 | 25780 RAS guanyl releasing protein 3 (calcium and DAG-regulated)                  |
| GO | cytoplasm | 247 | 4355 | 2E-04 | 25827 F-box and leucine-rich repeat protein 2                                     |
| GO | cytoplasm | 247 | 4355 | 2E-04 | 25884 chordin-like 2                                                              |
| GO | cytoplasm | 247 | 4355 | 2E-04 | 25953 paroxysmal nonkinesigenic dyskinesia                                        |
| GO | cytoplasm | 247 | 4355 | 2E-04 | 26019 UPF2 regulator of nonsense transcripts homolog (yeast)                      |
| GO | cytoplasm | 247 | 4355 | 2E-04 | 26059 ELKS/RAB6-interacting/CAST family member 2                                  |
| GO | cytoplasm | 247 | 4355 | 2E-04 | 26127 FGFR1 oncogene partner 2                                                    |
| GO | cytoplasm | 247 | 4355 | 2E-04 | 2618 phosphoribosylglycinamide formyltransferase, phosphoribosylglycinamide       |
| GO | cytoplasm | 247 | 4355 | 2E-04 | 26207 phosphatidylinositol transfer protein, cytoplasmic 1                        |
| GO | cytoplasm | 247 | 4355 | 2E-04 | 26230 T-cell lymphoma invasion and metastasis 2                                   |
| GO | cytoplasm | 247 | 4355 | 2E-04 | 2628 glycine amidinotransferase (L-arginine:glycine amidinotransferase)           |
| GO | cytoplasm | 247 | 4355 | 2E-04 | 26499 pleckstrin 2                                                                |
| GO | cytoplasm | 247 | 4355 | 2E-04 | 26586 cytoskeleton associated protein 2                                           |
| GO | cytoplasm | 247 | 4355 | 2E-04 | 26999 cytoplasmic FMR1 interacting protein 2                                      |
| GO | cytoplasm | 247 | 4355 | 2E-04 | 27065 DNA segment on chromosome 4 (unique) 234 expressed sequence                 |

|    |           |     |      |       |                                                                        |
|----|-----------|-----|------|-------|------------------------------------------------------------------------|
| GO | cytoplasm | 247 | 4355 | 2E-04 | 27241 Bardet-Biedl syndrome 9                                          |
| GO | cytoplasm | 247 | 4355 | 2E-04 | 27289 Rho family GTPase 1                                              |
| GO | cytoplasm | 247 | 4355 | 2E-04 | 2736 GLI family zinc finger 2                                          |
| GO | cytoplasm | 247 | 4355 | 2E-04 | 283455 kinase suppressor of ras 2                                      |
| GO | cytoplasm | 247 | 4355 | 2E-04 | 287 ankyrin 2, neuronal                                                |
| GO | cytoplasm | 247 | 4355 | 2E-04 | 28984 chromosome 13 open reading frame 15                              |
| GO | cytoplasm | 247 | 4355 | 2E-04 | 29767 tropomodulin 2 (neuronal)                                        |
| GO | cytoplasm | 247 | 4355 | 2E-04 | 29842 transcription factor CP2-like 1                                  |
| GO | cytoplasm | 247 | 4355 | 2E-04 | 29995 LIM and cysteine-rich domains 1                                  |
| GO | cytoplasm | 247 | 4355 | 2E-04 | 30011 SH3-domain kinase binding protein 1                              |
| GO | cytoplasm | 247 | 4355 | 2E-04 | 3028 hydroxysteroid (17-beta) dehydrogenase 10                         |
| GO | cytoplasm | 247 | 4355 | 2E-04 | 309 annexin A6                                                         |
| GO | cytoplasm | 247 | 4355 | 2E-04 | 3157 3-hydroxy-3-methylglutaryl-Coenzyme A synthase 1 (soluble)        |
| GO | cytoplasm | 247 | 4355 | 2E-04 | 3248 hydroxyprostaglandin dehydrogenase 15-(NAD)                       |
| GO | cytoplasm | 247 | 4355 | 2E-04 | 3276 protein arginine methyltransferase 1                              |
| GO | cytoplasm | 247 | 4355 | 2E-04 | 332 baculoviral IAP repeat-containing 5                                |
| GO | cytoplasm | 247 | 4355 | 2E-04 | 3336 heat shock 10kDa protein 1 (chaperonin 10)                        |
| GO | cytoplasm | 247 | 4355 | 2E-04 | 348 apolipoprotein E                                                   |
| GO | cytoplasm | 247 | 4355 | 2E-04 | 3557 interleukin 1 receptor antagonist                                 |
| GO | cytoplasm | 247 | 4355 | 2E-04 | 3763 potassium inwardly-rectifying channel, subfamily J, member 6      |
| GO | cytoplasm | 247 | 4355 | 2E-04 | 3800 kinesin family member 5C                                          |
| GO | cytoplasm | 247 | 4355 | 2E-04 | 3836 karyopherin alpha 1 (importin alpha 5)                            |
| GO | cytoplasm | 247 | 4355 | 2E-04 | 3838 karyopherin alpha 2 (RAG cohort 1, importin alpha 1)              |
| GO | cytoplasm | 247 | 4355 | 2E-04 | 389421 lin-28 homolog B (C. elegans)                                   |
| GO | cytoplasm | 247 | 4355 | 2E-04 | 3932 lymphocyte-specific protein tyrosine kinase                       |
| GO | cytoplasm | 247 | 4355 | 2E-04 | 3936 lymphocyte cytosolic protein 1 (L-plastin)                        |
| GO | cytoplasm | 247 | 4355 | 2E-04 | 400954 echinoderm microtubule associated protein like 6                |
| GO | cytoplasm | 247 | 4355 | 2E-04 | 409 arrestin, beta 2                                                   |
| GO | cytoplasm | 247 | 4355 | 2E-04 | 4287 ataxin 3                                                          |
| GO | cytoplasm | 247 | 4355 | 2E-04 | 4291 myeloid leukemia factor 1                                         |
| GO | cytoplasm | 247 | 4355 | 2E-04 | 4734 neural precursor cell expressed, developmentally down-regulated 4 |
| GO | cytoplasm | 247 | 4355 | 2E-04 | 4763 neurofibromin 1                                                   |
| GO | cytoplasm | 247 | 4355 | 2E-04 | 4830 non-metastatic cells 1, protein (NM23A) expressed in              |
| GO | cytoplasm | 247 | 4355 | 2E-04 | 50940 phosphodiesterase 11A                                            |
| GO | cytoplasm | 247 | 4355 | 2E-04 | 5110 protein-L-isoaspartate (D-aspartate) O-methyltransferase          |
| GO | cytoplasm | 247 | 4355 | 2E-04 | 51177 pleckstrin homology domain containing, family O member 1         |

|    |           |     |      |       |       |                                                                             |
|----|-----------|-----|------|-------|-------|-----------------------------------------------------------------------------|
| GO | cytoplasm | 247 | 4355 | 2E-04 | 51191 | hect domain and RLD 5                                                       |
| GO | cytoplasm | 247 | 4355 | 2E-04 | 51339 | dapper, antagonist of beta-catenin, homolog 1 ( <i>Xenopus laevis</i> )     |
| GO | cytoplasm | 247 | 4355 | 2E-04 | 51499 | TP53 regulated inhibitor of apoptosis 1                                     |
| GO | cytoplasm | 247 | 4355 | 2E-04 | 5216  | profilin 1                                                                  |
| GO | cytoplasm | 247 | 4355 | 2E-04 | 528   | ATPase, H <sup>+</sup> transporting, lysosomal 42kDa, V1 subunit C1         |
| GO | cytoplasm | 247 | 4355 | 2E-04 | 5303  | protein (peptidylprolyl cis/trans isomerase) NIMA-interacting, 4 (parvulin) |
| GO | cytoplasm | 247 | 4355 | 2E-04 | 5341  | pleckstrin                                                                  |
| GO | cytoplasm | 247 | 4355 | 2E-04 | 5420  | podocalyxin-like                                                            |
| GO | cytoplasm | 247 | 4355 | 2E-04 | 54332 | ganglioside-induced differentiation-associated protein 1                    |
| GO | cytoplasm | 247 | 4355 | 2E-04 | 54756 | interleukin 17 receptor D                                                   |
| GO | cytoplasm | 247 | 4355 | 2E-04 | 54839 | leucine rich repeat containing 49                                           |
| GO | cytoplasm | 247 | 4355 | 2E-04 | 54843 | synaptotagmin-like 2                                                        |
| GO | cytoplasm | 247 | 4355 | 2E-04 | 55012 | protein phosphatase 2 (formerly 2A), regulatory subunit B'', gamma          |
| GO | cytoplasm | 247 | 4355 | 2E-04 | 55135 | WD repeat containing, antisense to TP53                                     |
| GO | cytoplasm | 247 | 4355 | 2E-04 | 55165 | centrosomal protein 55kDa                                                   |
| GO | cytoplasm | 247 | 4355 | 2E-04 | 55207 | ADP-ribosylation factor-like 8B                                             |
| GO | cytoplasm | 247 | 4355 | 2E-04 | 55283 | mucolipin 3                                                                 |
| GO | cytoplasm | 247 | 4355 | 2E-04 | 55323 | La ribonucleoprotein domain family, member 6                                |
| GO | cytoplasm | 247 | 4355 | 2E-04 | 55521 | tripartite motif-containing 36                                              |
| GO | cytoplasm | 247 | 4355 | 2E-04 | 5569  | protein kinase (cAMP-dependent, catalytic) inhibitor alpha                  |
| GO | cytoplasm | 247 | 4355 | 2E-04 | 55752 | septin 11                                                                   |
| GO | cytoplasm | 247 | 4355 | 2E-04 | 55803 | ArfGAP with dual PH domains 2                                               |
| GO | cytoplasm | 247 | 4355 | 2E-04 | 55854 | zinc finger CCCH-type containing 15                                         |
| GO | cytoplasm | 247 | 4355 | 2E-04 | 5588  | protein kinase C, theta                                                     |
| GO | cytoplasm | 247 | 4355 | 2E-04 | 55916 | nuclear transport factor 2-like export factor 2                             |
| GO | cytoplasm | 247 | 4355 | 2E-04 | 56062 | kelch-like 4 ( <i>Drosophila</i> )                                          |
| GO | cytoplasm | 247 | 4355 | 2E-04 | 5702  | proteasome (prosome, macropain) 26S subunit, ATPase, 3                      |
| GO | cytoplasm | 247 | 4355 | 2E-04 | 5744  | parathyroid hormone-like hormone                                            |
| GO | cytoplasm | 247 | 4355 | 2E-04 | 57560 | intraflagellar transport 80 homolog ( <i>Chlamydomonas</i> )                |
| GO | cytoplasm | 247 | 4355 | 2E-04 | 57599 | WD repeat domain 48                                                         |
| GO | cytoplasm | 247 | 4355 | 2E-04 | 57650 | KIAA1524                                                                    |
| GO | cytoplasm | 247 | 4355 | 2E-04 | 57817 | hepcidin antimicrobial peptide                                              |
| GO | cytoplasm | 247 | 4355 | 2E-04 | 581   | BCL2-associated X protein                                                   |
| GO | cytoplasm | 247 | 4355 | 2E-04 | 586   | branched chain aminotransferase 1, cytosolic                                |
| GO | cytoplasm | 247 | 4355 | 2E-04 | 59    | actin, alpha 2, smooth muscle, aorta                                        |
| GO | cytoplasm | 247 | 4355 | 2E-04 | 5924  | Ras protein-specific guanine nucleotide-releasing factor 2                  |

|    |           |     |      |       |        |                                                                    |
|----|-----------|-----|------|-------|--------|--------------------------------------------------------------------|
| GO | cytoplasm | 247 | 4355 | 2E-04 | 5947   | retinol binding protein 1, cellular                                |
| GO | cytoplasm | 247 | 4355 | 2E-04 | 597    | BCL2-related protein A1                                            |
| GO | cytoplasm | 247 | 4355 | 2E-04 | 6133   | ribosomal protein L9                                               |
| GO | cytoplasm | 247 | 4355 | 2E-04 | 6204   | ribosomal protein S10                                              |
| GO | cytoplasm | 247 | 4355 | 2E-04 | 6241   | ribonucleotide reductase M2                                        |
| GO | cytoplasm | 247 | 4355 | 2E-04 | 6299   | sal-like 1 (Drosophila)                                            |
| GO | cytoplasm | 247 | 4355 | 2E-04 | 6347   | chemokine (C-C motif) ligand 2                                     |
| GO | cytoplasm | 247 | 4355 | 2E-04 | 641    | Bloom syndrome, RecQ helicase-like                                 |
| GO | cytoplasm | 247 | 4355 | 2E-04 | 64151  | non-SMC condensin I complex, subunit G                             |
| GO | cytoplasm | 247 | 4355 | 2E-04 | 6442   | sarcoglycan, alpha (50kDa dystrophin-associated glycoprotein)      |
| GO | cytoplasm | 247 | 4355 | 2E-04 | 6444   | sarcoglycan, delta (35kDa dystrophin-associated glycoprotein)      |
| GO | cytoplasm | 247 | 4355 | 2E-04 | 65009  | NDRG family member 4                                               |
| GO | cytoplasm | 247 | 4355 | 2E-04 | 65055  | receptor accessory protein 1                                       |
| GO | cytoplasm | 247 | 4355 | 2E-04 | 6525   | smoothelin                                                         |
| GO | cytoplasm | 247 | 4355 | 2E-04 | 6657   | SRY (sex determining region Y)-box 2                               |
| GO | cytoplasm | 247 | 4355 | 2E-04 | 6659   | SRY (sex determining region Y)-box 4                               |
| GO | cytoplasm | 247 | 4355 | 2E-04 | 667    | dystonin                                                           |
| GO | cytoplasm | 247 | 4355 | 2E-04 | 6672   | SP100 nuclear antigen                                              |
| GO | cytoplasm | 247 | 4355 | 2E-04 | 6683   | spastin                                                            |
| GO | cytoplasm | 247 | 4355 | 2E-04 | 6711   | spectrin, beta, non-erythrocytic 1                                 |
| GO | cytoplasm | 247 | 4355 | 2E-04 | 672    | breast cancer 1, early onset                                       |
| GO | cytoplasm | 247 | 4355 | 2E-04 | 6741   | Sjogren syndrome antigen B (autoantigen La)                        |
| GO | cytoplasm | 247 | 4355 | 2E-04 | 6820   | sulfotransferase family, cytosolic, 2B, member 1                   |
| GO | cytoplasm | 247 | 4355 | 2E-04 | 70     | actin, alpha, cardiac muscle 1                                     |
| GO | cytoplasm | 247 | 4355 | 2E-04 | 7078   | TIMP metalloproteinase inhibitor 3                                 |
| GO | cytoplasm | 247 | 4355 | 2E-04 | 7113   | transmembrane protease, serine 2                                   |
| GO | cytoplasm | 247 | 4355 | 2E-04 | 7137   | troponin I type 3 (cardiac)                                        |
| GO | cytoplasm | 247 | 4355 | 2E-04 | 7168   | tropomyosin 1 (alpha)                                              |
| GO | cytoplasm | 247 | 4355 | 2E-04 | 7171   | tropomyosin 4                                                      |
| GO | cytoplasm | 247 | 4355 | 2E-04 | 7220   | transient receptor potential cation channel, subfamily C, member 1 |
| GO | cytoplasm | 247 | 4355 | 2E-04 | 729230 | chemokine (C-C motif) receptor 2                                   |
| GO | cytoplasm | 247 | 4355 | 2E-04 | 7341   | SMT3 suppressor of mif two 3 homolog 1 (S. cerevisiae)             |
| GO | cytoplasm | 247 | 4355 | 2E-04 | 7347   | ubiquitin carboxyl-terminal esterase L3 (ubiquitin thiolesterase)  |
| GO | cytoplasm | 247 | 4355 | 2E-04 | 7353   | ubiquitin fusion degradation 1 like (yeast)                        |
| GO | cytoplasm | 247 | 4355 | 2E-04 | 7389   | uroporphyrinogen decarboxylase                                     |
| GO | cytoplasm | 247 | 4355 | 2E-04 | 7456   | WAS/WASL interacting protein family, member 1                      |

|    |           |     |      |       |                                                                         |
|----|-----------|-----|------|-------|-------------------------------------------------------------------------|
| GO | cytoplasm | 247 | 4355 | 2E-04 | 7490 Wilms tumor 1                                                      |
| GO | cytoplasm | 247 | 4355 | 2E-04 | 767 carbonic anhydrase VIII                                             |
| GO | cytoplasm | 247 | 4355 | 2E-04 | 7711 zinc finger protein 155                                            |
| GO | cytoplasm | 247 | 4355 | 2E-04 | 773 calcium channel, voltage-dependent, P/Q type, alpha 1A subunit      |
| GO | cytoplasm | 247 | 4355 | 2E-04 | 7840 Alstrom syndrome 1                                                 |
| GO | cytoplasm | 247 | 4355 | 2E-04 | 79187 fibronectin type III and SPRY domain containing 1                 |
| GO | cytoplasm | 247 | 4355 | 2E-04 | 79646 pantothenate kinase 3                                             |
| GO | cytoplasm | 247 | 4355 | 2E-04 | 79682 MLF1 interacting protein                                          |
| GO | cytoplasm | 247 | 4355 | 2E-04 | 79805 vasohibin 2                                                       |
| GO | cytoplasm | 247 | 4355 | 2E-04 | 79833 gem (nuclear organelle) associated protein 6                      |
| GO | cytoplasm | 247 | 4355 | 2E-04 | 79929 MAP6 domain containing 1                                          |
| GO | cytoplasm | 247 | 4355 | 2E-04 | 80712 ESX homeobox 1                                                    |
| GO | cytoplasm | 247 | 4355 | 2E-04 | 81606 limb bud and heart development homolog (mouse)                    |
| GO | cytoplasm | 247 | 4355 | 2E-04 | 81706 protein phosphatase 1, regulatory (inhibitor) subunit 14C         |
| GO | cytoplasm | 247 | 4355 | 2E-04 | 81786 tripartite motif-containing 7                                     |
| GO | cytoplasm | 247 | 4355 | 2E-04 | 8193 D4, zinc and double PHD fingers family 1                           |
| GO | cytoplasm | 247 | 4355 | 2E-04 | 83871 RAB34, member RAS oncogene family                                 |
| GO | cytoplasm | 247 | 4355 | 2E-04 | 8409 ubiquitously-expressed transcript                                  |
| GO | cytoplasm | 247 | 4355 | 2E-04 | 84206 mex-3 homolog B (C. elegans)                                      |
| GO | cytoplasm | 247 | 4355 | 2E-04 | 84296 GINS complex subunit 4 (Sld5 homolog)                             |
| GO | cytoplasm | 247 | 4355 | 2E-04 | 84365 MKI67 (FHA domain) interacting nucleolar phosphoprotein           |
| GO | cytoplasm | 247 | 4355 | 2E-04 | 84518 cornifelin                                                        |
| GO | cytoplasm | 247 | 4355 | 2E-04 | 84552 par-6 partitioning defective 6 homolog gamma (C. elegans)         |
| GO | cytoplasm | 247 | 4355 | 2E-04 | 8458 transcription termination factor, RNA polymerase II                |
| GO | cytoplasm | 247 | 4355 | 2E-04 | 84665 myopalladin                                                       |
| GO | cytoplasm | 247 | 4355 | 2E-04 | 84668 family with sequence similarity 126, member A                     |
| GO | cytoplasm | 247 | 4355 | 2E-04 | 84959 ubiquitin associated and SH3 domain containing, B                 |
| GO | cytoplasm | 247 | 4355 | 2E-04 | 8520 histone acetyltransferase 1                                        |
| GO | cytoplasm | 247 | 4355 | 2E-04 | 8533 COP9 constitutive photomorphogenic homolog subunit 3 (Arabidopsis) |
| GO | cytoplasm | 247 | 4355 | 2E-04 | 8536 calcium/calmodulin-dependent protein kinase I                      |
| GO | cytoplasm | 247 | 4355 | 2E-04 | 8563 THO complex 5                                                      |
| GO | cytoplasm | 247 | 4355 | 2E-04 | 8626 tumor protein p63                                                  |
| GO | cytoplasm | 247 | 4355 | 2E-04 | 8835 suppressor of cytokine signaling 2                                 |
| GO | cytoplasm | 247 | 4355 | 2E-04 | 8872 cell division cycle 123 homolog (S. cerevisiae)                    |
| GO | cytoplasm | 247 | 4355 | 2E-04 | 890 cyclin A2                                                           |
| GO | cytoplasm | 247 | 4355 | 2E-04 | 898 cyclin E1                                                           |

|    |               |     |      |       |                                                                                |
|----|---------------|-----|------|-------|--------------------------------------------------------------------------------|
| GO | cytoplasm     | 247 | 4355 | 2E-04 | 8997 kalirin, RhoGEF kinase                                                    |
| GO | cytoplasm     | 247 | 4355 | 2E-04 | 9053 microtubule-associated protein 7                                          |
| GO | cytoplasm     | 247 | 4355 | 2E-04 | 91624 nexilin (F actin binding protein)                                        |
| GO | cytoplasm     | 247 | 4355 | 2E-04 | 91801 alkB, alkylation repair homolog 8 (E. coli)                              |
| GO | cytoplasm     | 247 | 4355 | 2E-04 | 92312 mex-3 homolog A (C. elegans)                                             |
| GO | cytoplasm     | 247 | 4355 | 2E-04 | 9260 PDZ and LIM domain 7 (enigma)                                             |
| GO | cytoplasm     | 247 | 4355 | 2E-04 | 92675 D-tyrosyl-tRNA deacylase 1 homolog (S. cerevisiae)                       |
| GO | cytoplasm     | 247 | 4355 | 2E-04 | 93323 HAUS augmin-like complex, subunit 8                                      |
| GO | cytoplasm     | 247 | 4355 | 2E-04 | 93474 zinc finger protein 670                                                  |
| GO | cytoplasm     | 247 | 4355 | 2E-04 | 9419 cysteine-rich PDZ-binding protein                                         |
| GO | cytoplasm     | 247 | 4355 | 2E-04 | 9455 homer homolog 2 (Drosophila)                                              |
| GO | cytoplasm     | 247 | 4355 | 2E-04 | 9568 gamma-aminobutyric acid (GABA) B receptor, 2                              |
| GO | cytoplasm     | 247 | 4355 | 2E-04 | 9805 secernin 1                                                                |
| GO | cytoplasm     | 247 | 4355 | 2E-04 | 9833 maternal embryonic leucine zipper kinase                                  |
| GO | cytoplasm     | 247 | 4355 | 2E-04 | 9882 TBC1 domain family, member 4                                              |
| GO | actin binding | 27  | 278  | 2E-04 | 10096 ARP3 actin-related protein 3 homolog (yeast)                             |
| GO | actin binding | 27  | 278  | 2E-04 | 10097 ARP2 actin-related protein 2 homolog (yeast)                             |
| GO | actin binding | 27  | 278  | 2E-04 | 10391 coronin, actin binding protein, 2B                                       |
| GO | actin binding | 27  | 278  | 2E-04 | 10788 IQ motif containing GTPase activating protein 2                          |
| GO | actin binding | 27  | 278  | 2E-04 | 1264 calponin 1, basic, smooth muscle                                          |
| GO | actin binding | 27  | 278  | 2E-04 | 1730 diaphanous homolog 2 (Drosophila)                                         |
| GO | actin binding | 27  | 278  | 2E-04 | 2037 erythrocyte membrane protein band 4.1-like 2                              |
| GO | actin binding | 27  | 278  | 2E-04 | 23136 erythrocyte membrane protein band 4.1-like 3                             |
| GO | actin binding | 27  | 278  | 2E-04 | 29767 tropomodulin 2 (neuronal)                                                |
| GO | actin binding | 27  | 278  | 2E-04 | 3778 potassium large conductance calcium-activated channel, subfamily M, alpha |
| GO | actin binding | 27  | 278  | 2E-04 | 3936 lymphocyte cytosolic protein 1 (L-plastin)                                |
| GO | actin binding | 27  | 278  | 2E-04 | 4430 myosin IB                                                                 |
| GO | actin binding | 27  | 278  | 2E-04 | 4651 myosin X                                                                  |
| GO | actin binding | 27  | 278  | 2E-04 | 5216 profilin 1                                                                |
| GO | actin binding | 27  | 278  | 2E-04 | 54822 transient receptor potential cation channel, subfamily M, member 7       |
| GO | actin binding | 27  | 278  | 2E-04 | 56062 kelch-like 4 (Drosophila)                                                |
| GO | actin binding | 27  | 278  | 2E-04 | 6525 smoothelin                                                                |
| GO | actin binding | 27  | 278  | 2E-04 | 667 dystonin                                                                   |
| GO | actin binding | 27  | 278  | 2E-04 | 6711 spectrin, beta, non-erythrocytic 1                                        |
| GO | actin binding | 27  | 278  | 2E-04 | 7137 troponin I type 3 (cardiac)                                               |
| GO | actin binding | 27  | 278  | 2E-04 | 7168 tropomyosin 1 (alpha)                                                     |



|    |                                          |    |     |       |                                                                            |
|----|------------------------------------------|----|-----|-------|----------------------------------------------------------------------------|
| GO | actin binding                            | 27 | 278 | 2E-04 | 7171 tropomyosin 4                                                         |
| GO | actin binding                            | 27 | 278 | 2E-04 | 7456 WAS/WASL interacting protein family, member 1                         |
| GO | actin binding                            | 27 | 278 | 2E-04 | 81624 diaphanous homolog 3 (Drosophila)                                    |
| GO | actin binding                            | 27 | 278 | 2E-04 | 84665 myopalladin                                                          |
| GO | actin binding                            | 27 | 278 | 2E-04 | 9455 homer homolog 2 (Drosophila)                                          |
| GO | actin binding                            | 27 | 278 | 2E-04 | 9535 glia maturation factor, gamma                                         |
| GO | collagen                                 | 6  | 22  | 4E-04 | 1282 collagen, type IV, alpha 1                                            |
| GO | collagen                                 | 6  | 22  | 4E-04 | 1284 collagen, type IV, alpha 2                                            |
| GO | collagen                                 | 6  | 22  | 4E-04 | 1288 collagen, type IV, alpha 6                                            |
| GO | collagen                                 | 6  | 22  | 4E-04 | 1289 collagen, type V, alpha 1                                             |
| GO | collagen                                 | 6  | 22  | 4E-04 | 1290 collagen, type V, alpha 2                                             |
| GO | collagen                                 | 6  | 22  | 4E-04 | 1301 collagen, type XI, alpha 1                                            |
| GO | synapse assembly                         | 7  | 33  | 7E-04 | 1000 cadherin 2, type 1, N-cadherin (neuronal)                             |
| GO | synapse assembly                         | 7  | 33  | 7E-04 | 23705 cell adhesion molecule 1                                             |
| GO | synapse assembly                         | 7  | 33  | 7E-04 | 4897 neuronal cell adhesion molecule                                       |
| GO | synapse assembly                         | 7  | 33  | 7E-04 | 56126 protocadherin beta 10                                                |
| GO | synapse assembly                         | 7  | 33  | 7E-04 | 56133 protocadherin beta 2                                                 |
| GO | synapse assembly                         | 7  | 33  | 7E-04 | 773 calcium channel, voltage-dependent, P/Q type, alpha 1A subunit         |
| GO | synapse assembly                         | 7  | 33  | 7E-04 | 92737 delta/notch-like EGF repeat containing                               |
| GO | positive regulation of Wnt receptor sign | 4  | 10  | 8E-04 | 5494 protein phosphatase, Mg <sup>2+</sup> /Mn <sup>2+</sup> dependent, 1A |
| GO | positive regulation of Wnt receptor sign | 4  | 10  | 8E-04 | 6299 sal-like 1 (Drosophila)                                               |
| GO | positive regulation of Wnt receptor sign | 4  | 10  | 8E-04 | 6659 SRY (sex determining region Y)-box 4                                  |
| GO | positive regulation of Wnt receptor sign | 4  | 10  | 8E-04 | 9839 zinc finger E-box binding homeobox 2                                  |
| GO | thrombin receptor activity               | 3  | 5   | 9E-04 | 2149 coagulation factor II (thrombin) receptor                             |
| GO | thrombin receptor activity               | 3  | 5   | 9E-04 | 2150 coagulation factor II (thrombin) receptor-like 1                      |
| GO | thrombin receptor activity               | 3  | 5   | 9E-04 | 2151 coagulation factor II (thrombin) receptor-like 2                      |
| GO | negative regulation of chondrocyte diffe | 3  | 5   | 9E-04 | 2736 GLI family zinc finger 2                                              |
| GO | negative regulation of chondrocyte diffe | 3  | 5   | 9E-04 | 5744 parathyroid hormone-like hormone                                      |
| GO | negative regulation of chondrocyte diffe | 3  | 5   | 9E-04 | 6662 SRY (sex determining region Y)-box 9                                  |
| GO | negative regulation of DNA recombinati   | 3  | 5   | 9E-04 | 4436 mutS homolog 2, colon cancer, nonpolyposis type 1 (E. coli)           |
| GO | negative regulation of DNA recombinati   | 3  | 5   | 9E-04 | 56852 RAD18 homolog (S. cerevisiae)                                        |
| GO | negative regulation of DNA recombinati   | 3  | 5   | 9E-04 | 641 Bloom syndrome, RecQ helicase-like                                     |
| GO | collagen fibril organization             | 6  | 26  | 0.001 | 1289 collagen, type V, alpha 1                                             |
| GO | collagen fibril organization             | 6  | 26  | 0.001 | 1290 collagen, type V, alpha 2                                             |
| GO | collagen fibril organization             | 6  | 26  | 0.001 | 1301 collagen, type XI, alpha 1                                            |
| GO | collagen fibril organization             | 6  | 26  | 0.001 | 4060 lumican                                                               |

|    |                              |    |     |       |        |                                                                          |
|----|------------------------------|----|-----|-------|--------|--------------------------------------------------------------------------|
| GO | collagen fibril organization | 6  | 26  | 0.001 | 4763   | neurofibromin 1                                                          |
| GO | collagen fibril organization | 6  | 26  | 0.001 | 7046   | transforming growth factor, beta receptor 1                              |
| GO | nucleoplasm                  | 36 | 455 | 0.001 | 1026   | cyclin-dependent kinase inhibitor 1A (p21, Cip1)                         |
| GO | nucleoplasm                  | 36 | 455 | 0.001 | 10492  | synaptotagmin binding, cytoplasmic RNA interacting protein               |
| GO | nucleoplasm                  | 36 | 455 | 0.001 | 10785  | WD repeat domain 4                                                       |
| GO | nucleoplasm                  | 36 | 455 | 0.001 | 11169  | WD repeat and HMG-box DNA binding protein 1                              |
| GO | nucleoplasm                  | 36 | 455 | 0.001 | 1161   | excision repair cross-complementing rodent repair deficiency, complement |
| GO | nucleoplasm                  | 36 | 455 | 0.001 | 135295 | splicing factor, arginine/serine-rich 13B                                |
| GO | nucleoplasm                  | 36 | 455 | 0.001 | 1643   | damage-specific DNA binding protein 2, 48kDa                             |
| GO | nucleoplasm                  | 36 | 455 | 0.001 | 1763   | DNA replication helicase 2 homolog (yeast)                               |
| GO | nucleoplasm                  | 36 | 455 | 0.001 | 23594  | origin recognition complex, subunit 6 like (yeast)                       |
| GO | nucleoplasm                  | 36 | 455 | 0.001 | 25885  | polymerase (RNA) I polypeptide A, 194kDa                                 |
| GO | nucleoplasm                  | 36 | 455 | 0.001 | 27330  | ribosomal protein S6 kinase, 90kDa, polypeptide 6                        |
| GO | nucleoplasm                  | 36 | 455 | 0.001 | 2965   | general transcription factor IIH, polypeptide 1, 62kDa                   |
| GO | nucleoplasm                  | 36 | 455 | 0.001 | 3836   | karyopherin alpha 1 (importin alpha 5)                                   |
| GO | nucleoplasm                  | 36 | 455 | 0.001 | 3838   | karyopherin alpha 2 (RAG cohort 1, importin alpha 1)                     |
| GO | nucleoplasm                  | 36 | 455 | 0.001 | 4171   | minichromosome maintenance complex component 2                           |
| GO | nucleoplasm                  | 36 | 455 | 0.001 | 4287   | ataxin 3                                                                 |
| GO | nucleoplasm                  | 36 | 455 | 0.001 | 4928   | nucleoporin 98kDa                                                        |
| GO | nucleoplasm                  | 36 | 455 | 0.001 | 4968   | 8-oxoguanine DNA glycosylase                                             |
| GO | nucleoplasm                  | 36 | 455 | 0.001 | 5000   | origin recognition complex, subunit 4-like (yeast)                       |
| GO | nucleoplasm                  | 36 | 455 | 0.001 | 5245   | prohibitin                                                               |
| GO | nucleoplasm                  | 36 | 455 | 0.001 | 5440   | polymerase (RNA) II (DNA directed) polypeptide K, 7.0kDa                 |
| GO | nucleoplasm                  | 36 | 455 | 0.001 | 55215  | Fanconi anemia, complementation group I                                  |
| GO | nucleoplasm                  | 36 | 455 | 0.001 | 5558   | primase, DNA, polypeptide 2 (58kDa)                                      |
| GO | nucleoplasm                  | 36 | 455 | 0.001 | 55759  | WD repeat domain 12                                                      |
| GO | nucleoplasm                  | 36 | 455 | 0.001 | 56339  | methyltransferase like 3                                                 |
| GO | nucleoplasm                  | 36 | 455 | 0.001 | 64782  | apoptosis enhancing nuclease                                             |
| GO | nucleoplasm                  | 36 | 455 | 0.001 | 6637   | small nuclear ribonucleoprotein polypeptide G                            |
| GO | nucleoplasm                  | 36 | 455 | 0.001 | 672    | breast cancer 1, early onset                                             |
| GO | nucleoplasm                  | 36 | 455 | 0.001 | 7324   | ubiquitin-conjugating enzyme E2E 1 (UBC4/5 homolog, yeast)               |
| GO | nucleoplasm                  | 36 | 455 | 0.001 | 7490   | Wilms tumor 1                                                            |
| GO | nucleoplasm                  | 36 | 455 | 0.001 | 79075  | defective in sister chromatid cohesion 1 homolog (S. cerevisiae)         |
| GO | nucleoplasm                  | 36 | 455 | 0.001 | 79833  | gem (nuclear organelle) associated protein 6                             |
| GO | nucleoplasm                  | 36 | 455 | 0.001 | 84172  | polymerase (RNA) I polypeptide B, 128kDa                                 |
| GO | nucleoplasm                  | 36 | 455 | 0.001 | 84365  | MKI67 (FHA domain) interacting nucleolar phosphoprotein                  |

|    |                                          |    |     |       |        |                                                                              |
|----|------------------------------------------|----|-----|-------|--------|------------------------------------------------------------------------------|
| GO | nucleoplasm                              | 36 | 455 | 0.001 | 890    | cyclin A2                                                                    |
| GO | nucleoplasm                              | 36 | 455 | 0.001 | 898    | cyclin E1                                                                    |
| GO | actomyosin structure organization        | 3  | 6   | 0.002 | 1264   | calponin 1, basic, smooth muscle                                             |
| GO | actomyosin structure organization        | 3  | 6   | 0.002 | 54822  | transient receptor potential cation channel, subfamily M, member 7           |
| GO | actomyosin structure organization        | 3  | 6   | 0.002 | 70     | actin, alpha, cardiac muscle 1                                               |
| GO | collagen type IV                         | 3  | 6   | 0.002 | 1282   | collagen, type IV, alpha 1                                                   |
| GO | collagen type IV                         | 3  | 6   | 0.002 | 1284   | collagen, type IV, alpha 2                                                   |
| GO | collagen type IV                         | 3  | 6   | 0.002 | 1288   | collagen, type IV, alpha 6                                                   |
| GO | negative regulation of protein import in | 2  | 2   | 0.002 | 11142  | protein kinase (cAMP-dependent, catalytic) inhibitor gamma                   |
| GO | negative regulation of protein import in | 2  | 2   | 0.002 | 5569   | protein kinase (cAMP-dependent, catalytic) inhibitor alpha                   |
| GO | regulation of acetylcholine secretion    | 2  | 2   | 0.002 | 1136   | cholinergic receptor, nicotinic, alpha 3                                     |
| GO | regulation of acetylcholine secretion    | 2  | 2   | 0.002 | 773    | calcium channel, voltage-dependent, P/Q type, alpha 1A subunit               |
| GO | DNA replication, removal of RNA primer   | 2  | 2   | 0.002 | 1763   | DNA replication helicase 2 homolog (yeast)                                   |
| GO | DNA replication, removal of RNA primer   | 2  | 2   | 0.002 | 2237   | flap structure-specific endonuclease 1                                       |
| GO | negative regulation of mitotic recombina | 2  | 2   | 0.002 | 4292   | mutL homolog 1, colon cancer, nonpolyposis type 2 (E. coli)                  |
| GO | negative regulation of mitotic recombina | 2  | 2   | 0.002 | 641    | Bloom syndrome, RecQ helicase-like                                           |
| GO | CCR2 chemokine receptor binding          | 2  | 2   | 0.002 | 6347   | chemokine (C-C motif) ligand 2                                               |
| GO | CCR2 chemokine receptor binding          | 2  | 2   | 0.002 | 729230 | chemokine (C-C motif) receptor 2                                             |
| GO | ectoderm and mesoderm interaction        | 2  | 2   | 0.002 | 6591   | snail homolog 2 (Drosophila)                                                 |
| GO | ectoderm and mesoderm interaction        | 2  | 2   | 0.002 | 8626   | tumor protein p63                                                            |
| GO | regulation of smooth muscle contractio   | 4  | 13  | 0.002 | 1136   | cholinergic receptor, nicotinic, alpha 3                                     |
| GO | regulation of smooth muscle contractio   | 4  | 13  | 0.002 | 1264   | calponin 1, basic, smooth muscle                                             |
| GO | regulation of smooth muscle contractio   | 4  | 13  | 0.002 | 2321   | fms-related tyrosine kinase 1 (vascular endothelial growth factor/vascular f |
| GO | regulation of smooth muscle contractio   | 4  | 13  | 0.002 | 7137   | troponin I type 3 (cardiac)                                                  |
| GO | DNA recombination                        | 8  | 52  | 0.003 | 201299 | RAD52 motif 1                                                                |
| GO | DNA recombination                        | 8  | 52  | 0.003 | 29893  | PSMC3 interacting protein                                                    |
| GO | DNA recombination                        | 8  | 52  | 0.003 | 3149   | high-mobility group box 3                                                    |
| GO | DNA recombination                        | 8  | 52  | 0.003 | 3516   | recombination signal binding protein for immunoglobulin kappa J region       |
| GO | DNA recombination                        | 8  | 52  | 0.003 | 5889   | RAD51 homolog C (S. cerevisiae)                                              |
| GO | DNA recombination                        | 8  | 52  | 0.003 | 5965   | RecQ protein-like (DNA helicase Q1-like)                                     |
| GO | DNA recombination                        | 8  | 52  | 0.003 | 641    | Bloom syndrome, RecQ helicase-like                                           |
| GO | DNA recombination                        | 8  | 52  | 0.003 | 79677  | structural maintenance of chromosomes 6                                      |
| GO | proximal/distal pattern formation        | 5  | 22  | 0.003 | 1746   | distal-less homeobox 2                                                       |
| GO | proximal/distal pattern formation        | 5  | 22  | 0.003 | 2736   | GLI family zinc finger 2                                                     |
| GO | proximal/distal pattern formation        | 5  | 22  | 0.003 | 3236   | homeobox D10                                                                 |
| GO | proximal/distal pattern formation        | 5  | 22  | 0.003 | 3237   | homeobox D11                                                                 |

|    |                                           |    |     |       |        |                                                                   |
|----|-------------------------------------------|----|-----|-------|--------|-------------------------------------------------------------------|
| GO | proximal/distal pattern formation         | 5  | 22  | 0.003 | 8626   | tumor protein p63                                                 |
| GO | positive regulation of filopodium assem   | 3  | 7   | 0.003 | 10096  | ARP3 actin-related protein 3 homolog (yeast)                      |
| GO | positive regulation of filopodium assem   | 3  | 7   | 0.003 | 5588   | protein kinase C, theta                                           |
| GO | positive regulation of filopodium assem   | 3  | 7   | 0.003 | 7046   | transforming growth factor, beta receptor 1                       |
| GO | positive regulation of Notch signaling pæ | 3  | 7   | 0.003 | 182    | jagged 1 (Alagille syndrome)                                      |
| GO | positive regulation of Notch signaling pæ | 3  | 7   | 0.003 | 6657   | SRY (sex determining region Y)-box 2                              |
| GO | positive regulation of Notch signaling pæ | 3  | 7   | 0.003 | 8626   | tumor protein p63                                                 |
| GO | DNA replication                           | 15 | 146 | 0.003 | 2237   | flap structure-specific endonuclease 1                            |
| GO | DNA replication                           | 15 | 146 | 0.003 | 23594  | origin recognition complex, subunit 6 like (yeast)                |
| GO | DNA replication                           | 15 | 146 | 0.003 | 4171   | minichromosome maintenance complex component 2                    |
| GO | DNA replication                           | 15 | 146 | 0.003 | 4928   | nucleoporin 98kDa                                                 |
| GO | DNA replication                           | 15 | 146 | 0.003 | 5000   | origin recognition complex, subunit 4-like (yeast)                |
| GO | DNA replication                           | 15 | 146 | 0.003 | 5245   | prohibitin                                                        |
| GO | DNA replication                           | 15 | 146 | 0.003 | 5469   | mediator complex subunit 1                                        |
| GO | DNA replication                           | 15 | 146 | 0.003 | 5558   | primase, DNA, polypeptide 2 (58kDa)                               |
| GO | DNA replication                           | 15 | 146 | 0.003 | 5965   | RecQ protein-like (DNA helicase Q1-like)                          |
| GO | DNA replication                           | 15 | 146 | 0.003 | 6241   | ribonucleotide reductase M2                                       |
| GO | DNA replication                           | 15 | 146 | 0.003 | 641    | Bloom syndrome, RecQ helicase-like                                |
| GO | DNA replication                           | 15 | 146 | 0.003 | 64785  | GINS complex subunit 3 (Psf3 homolog)                             |
| GO | DNA replication                           | 15 | 146 | 0.003 | 7298   | thymidylate synthetase                                            |
| GO | DNA replication                           | 15 | 146 | 0.003 | 79075  | defective in sister chromatid cohesion 1 homolog (S. cerevisiae)  |
| GO | DNA replication                           | 15 | 146 | 0.003 | 84296  | GINS complex subunit 4 (Sld5 homolog)                             |
| GO | damaged DNA binding                       | 7  | 44  | 0.004 | 157570 | establishment of cohesion 1 homolog 2 (S. cerevisiae)             |
| GO | damaged DNA binding                       | 7  | 44  | 0.004 | 1643   | damage-specific DNA binding protein 2, 48kDa                      |
| GO | damaged DNA binding                       | 7  | 44  | 0.004 | 2237   | flap structure-specific endonuclease 1                            |
| GO | damaged DNA binding                       | 7  | 44  | 0.004 | 4436   | mutS homolog 2, colon cancer, nonpolyposis type 1 (E. coli)       |
| GO | damaged DNA binding                       | 7  | 44  | 0.004 | 4968   | 8-oxoguanine DNA glycosylase                                      |
| GO | damaged DNA binding                       | 7  | 44  | 0.004 | 56852  | RAD18 homolog (S. cerevisiae)                                     |
| GO | damaged DNA binding                       | 7  | 44  | 0.004 | 8626   | tumor protein p63                                                 |
| GO | cell projection                           | 11 | 94  | 0.004 | 10097  | ARP2 actin-related protein 2 homolog (yeast)                      |
| GO | cell projection                           | 11 | 94  | 0.004 | 26499  | pleckstrin 2                                                      |
| GO | cell projection                           | 11 | 94  | 0.004 | 3751   | potassium voltage-gated channel, Shal-related subfamily, member 2 |
| GO | cell projection                           | 11 | 94  | 0.004 | 51062  | atlastin GTPase 1                                                 |
| GO | cell projection                           | 11 | 94  | 0.004 | 55752  | septin 11                                                         |
| GO | cell projection                           | 11 | 94  | 0.004 | 57560  | intraflagellar transport 80 homolog (Chlamydomonas)               |
| GO | cell projection                           | 11 | 94  | 0.004 | 773    | calcium channel, voltage-dependent, P/Q type, alpha 1A subunit    |

|    |                  |    |     |       |                                                                                |
|----|------------------|----|-----|-------|--------------------------------------------------------------------------------|
| GO | cell projection  | 11 | 94  | 0.004 | 84168 anthrax toxin receptor 1                                                 |
| GO | cell projection  | 11 | 94  | 0.004 | 8777 multiple PDZ domain protein                                               |
| GO | cell projection  | 11 | 94  | 0.004 | 9419 cysteine-rich PDZ-binding protein                                         |
| GO | cell projection  | 11 | 94  | 0.004 | 9497 solute carrier family 4, sodium bicarbonate cotransporter, member 7       |
| GO | response to drug | 20 | 225 | 0.004 | 1026 cyclin-dependent kinase inhibitor 1A (p21, Cip1)                          |
| GO | response to drug | 20 | 225 | 0.004 | 10512 sema domain, immunoglobulin domain (Ig), short basic domain, secreted, ( |
| GO | response to drug | 20 | 225 | 0.004 | 1136 cholinergic receptor, nicotinic, alpha 3                                  |
| GO | response to drug | 20 | 225 | 0.004 | 1503 CTP synthase                                                              |
| GO | response to drug | 20 | 225 | 0.004 | 1543 cytochrome P450, family 1, subfamily A, polypeptide 1                     |
| GO | response to drug | 20 | 225 | 0.004 | 2027 enolase 3 (beta, muscle)                                                  |
| GO | response to drug | 20 | 225 | 0.004 | 220 aldehyde dehydrogenase 1 family, member A3                                 |
| GO | response to drug | 20 | 225 | 0.004 | 2878 glutathione peroxidase 3 (plasma)                                         |
| GO | response to drug | 20 | 225 | 0.004 | 3157 3-hydroxy-3-methylglutaryl-Coenzyme A synthase 1 (soluble)                |
| GO | response to drug | 20 | 225 | 0.004 | 3932 lymphocyte-specific protein tyrosine kinase                               |
| GO | response to drug | 20 | 225 | 0.004 | 4436 mutS homolog 2, colon cancer, nonpolyposis type 1 (E. coli)               |
| GO | response to drug | 20 | 225 | 0.004 | 4830 non-metastatic cells 1, protein (NM23A) expressed in                      |
| GO | response to drug | 20 | 225 | 0.004 | 5021 oxytocin receptor                                                         |
| GO | response to drug | 20 | 225 | 0.004 | 5228 placental growth factor                                                   |
| GO | response to drug | 20 | 225 | 0.004 | 590 butyrylcholinesterase                                                      |
| GO | response to drug | 20 | 225 | 0.004 | 6347 chemokine (C-C motif) ligand 2                                            |
| GO | response to drug | 20 | 225 | 0.004 | 6546 solute carrier family 8 (sodium/calcium exchanger), member 1              |
| GO | response to drug | 20 | 225 | 0.004 | 70 actin, alpha, cardiac muscle 1                                              |
| GO | response to drug | 20 | 225 | 0.004 | 898 cyclin E1                                                                  |
| GO | response to drug | 20 | 225 | 0.004 | 9420 cytochrome P450, family 7, subfamily B, polypeptide 1                     |
| GO | cell junction    | 30 | 387 | 0.004 | 10052 gap junction protein, gamma 1, 45kDa                                     |
| GO | cell junction    | 30 | 387 | 0.004 | 11149 blood vessel epicardial substance                                        |
| GO | cell junction    | 30 | 387 | 0.004 | 1136 cholinergic receptor, nicotinic, alpha 3                                  |
| GO | cell junction    | 30 | 387 | 0.004 | 1138 cholinergic receptor, nicotinic, alpha 5                                  |
| GO | cell junction    | 30 | 387 | 0.004 | 126374 Wilms tumor 1 interacting protein                                       |
| GO | cell junction    | 30 | 387 | 0.004 | 127534 gap junction protein, beta 4, 30.3kDa                                   |
| GO | cell junction    | 30 | 387 | 0.004 | 1496 catenin (cadherin-associated protein), alpha 2                            |
| GO | cell junction    | 30 | 387 | 0.004 | 1830 desmoglein 3 (pemphigus vulgaris antigen)                                 |
| GO | cell junction    | 30 | 387 | 0.004 | 200959 gamma-aminobutyric acid (GABA) receptor, rho 3                          |
| GO | cell junction    | 30 | 387 | 0.004 | 23562 claudin 14                                                               |
| GO | cell junction    | 30 | 387 | 0.004 | 2558 gamma-aminobutyric acid (GABA) A receptor, alpha 5                        |
| GO | cell junction    | 30 | 387 | 0.004 | 26059 ELKS/RAB6-interacting/CAST family member 2                               |

|    |                    |    |     |       |        |                                                             |
|----|--------------------|----|-----|-------|--------|-------------------------------------------------------------|
| GO | cell junction      | 30 | 387 | 0.004 | 26999  | cytoplasmic FMR1 interacting protein 2                      |
| GO | cell junction      | 30 | 387 | 0.004 | 27445  | piccolo (presynaptic cytomatrix protein)                    |
| GO | cell junction      | 30 | 387 | 0.004 | 2898   | glutamate receptor, ionotropic, kainate 2                   |
| GO | cell junction      | 30 | 387 | 0.004 | 2906   | glutamate receptor, ionotropic, N-methyl D-aspartate 2D     |
| GO | cell junction      | 30 | 387 | 0.004 | 30011  | SH3-domain kinase binding protein 1                         |
| GO | cell junction      | 30 | 387 | 0.004 | 3936   | lymphocyte cytosolic protein 1 (L-plastin)                  |
| GO | cell junction      | 30 | 387 | 0.004 | 4867   | nephronophthisis 1 (juvenile)                               |
| GO | cell junction      | 30 | 387 | 0.004 | 55752  | septin 11                                                   |
| GO | cell junction      | 30 | 387 | 0.004 | 5795   | protein tyrosine phosphatase, receptor type, J              |
| GO | cell junction      | 30 | 387 | 0.004 | 84552  | par-6 partitioning defective 6 homolog gamma (C. elegans)   |
| GO | cell junction      | 30 | 387 | 0.004 | 8777   | multiple PDZ domain protein                                 |
| GO | cell junction      | 30 | 387 | 0.004 | 9076   | claudin 1                                                   |
| GO | cell junction      | 30 | 387 | 0.004 | 91624  | nexilin (F actin binding protein)                           |
| GO | cell junction      | 30 | 387 | 0.004 | 9260   | PDZ and LIM domain 7 (enigma)                               |
| GO | cell junction      | 30 | 387 | 0.004 | 9419   | cysteine-rich PDZ-binding protein                           |
| GO | cell junction      | 30 | 387 | 0.004 | 9455   | homer homolog 2 (Drosophila)                                |
| GO | cell junction      | 30 | 387 | 0.004 | 9568   | gamma-aminobutyric acid (GABA) B receptor, 2                |
| GO | cell junction      | 30 | 387 | 0.004 | 9635   | chloride channel accessory 2                                |
| GO | DNA repair         | 17 | 182 | 0.005 | 157570 | establishment of cohesion 1 homolog 2 (S. cerevisiae)       |
| GO | DNA repair         | 17 | 182 | 0.005 | 1643   | damage-specific DNA binding protein 2, 48kDa                |
| GO | DNA repair         | 17 | 182 | 0.005 | 201299 | RAD52 motif 1                                               |
| GO | DNA repair         | 17 | 182 | 0.005 | 2139   | eyes absent homolog 2 (Drosophila)                          |
| GO | DNA repair         | 17 | 182 | 0.005 | 2237   | flap structure-specific endonuclease 1                      |
| GO | DNA repair         | 17 | 182 | 0.005 | 29128  | ubiquitin-like with PHD and ring finger domains 1           |
| GO | DNA repair         | 17 | 182 | 0.005 | 2965   | general transcription factor IIH, polypeptide 1, 62kDa      |
| GO | DNA repair         | 17 | 182 | 0.005 | 4436   | mutS homolog 2, colon cancer, nonpolyposis type 1 (E. coli) |
| GO | DNA repair         | 17 | 182 | 0.005 | 55215  | Fanconi anemia, complementation group I                     |
| GO | DNA repair         | 17 | 182 | 0.005 | 56852  | RAD18 homolog (S. cerevisiae)                               |
| GO | DNA repair         | 17 | 182 | 0.005 | 5889   | RAD51 homolog C (S. cerevisiae)                             |
| GO | DNA repair         | 17 | 182 | 0.005 | 5965   | RecQ protein-like (DNA helicase Q1-like)                    |
| GO | DNA repair         | 17 | 182 | 0.005 | 641    | Bloom syndrome, RecQ helicase-like                          |
| GO | DNA repair         | 17 | 182 | 0.005 | 7298   | thymidylate synthetase                                      |
| GO | DNA repair         | 17 | 182 | 0.005 | 7341   | SMT3 suppressor of mif two 3 homolog 1 (S. cerevisiae)      |
| GO | DNA repair         | 17 | 182 | 0.005 | 79677  | structural maintenance of chromosomes 6                     |
| GO | DNA repair         | 17 | 182 | 0.005 | 91442  | chromosome 19 open reading frame 40                         |
| GO | organ regeneration | 6  | 35  | 0.005 | 1026   | cyclin-dependent kinase inhibitor 1A (p21, Cip1)            |

|    |                          |    |     |       |                                                                       |
|----|--------------------------|----|-----|-------|-----------------------------------------------------------------------|
| GO | organ regeneration       | 6  | 35  | 0.005 | 558 AXL receptor tyrosine kinase                                      |
| GO | organ regeneration       | 6  | 35  | 0.005 | 6347 chemokine (C-C motif) ligand 2                                   |
| GO | organ regeneration       | 6  | 35  | 0.005 | 7046 transforming growth factor, beta receptor 1                      |
| GO | organ regeneration       | 6  | 35  | 0.005 | 890 cyclin A2                                                         |
| GO | organ regeneration       | 6  | 35  | 0.005 | 898 cyclin E1                                                         |
| GO | fat cell differentiation | 5  | 25  | 0.005 | 27241 Bardet-Biedl syndrome 9                                         |
| GO | fat cell differentiation | 5  | 25  | 0.005 | 3589 interleukin 11                                                   |
| GO | fat cell differentiation | 5  | 25  | 0.005 | 5469 mediator complex subunit 1                                       |
| GO | fat cell differentiation | 5  | 25  | 0.005 | 64318 nucleolar complex associated 3 homolog ( <i>S. cerevisiae</i> ) |
| GO | fat cell differentiation | 5  | 25  | 0.005 | 81029 wingless-type MMTV integration site family, member 5B           |
| GO | muscle contraction       | 11 | 97  | 0.005 | 10052 gap junction protein, gamma 1, 45kDa                            |
| GO | muscle contraction       | 11 | 97  | 0.005 | 2281 FK506 binding protein 1B, 12.6 kDa                               |
| GO | muscle contraction       | 11 | 97  | 0.005 | 4637 myosin, light chain 6, alkali, smooth muscle and non-muscle      |
| GO | muscle contraction       | 11 | 97  | 0.005 | 5021 oxytocin receptor                                                |
| GO | muscle contraction       | 11 | 97  | 0.005 | 59 actin, alpha 2, smooth muscle, aorta                               |
| GO | muscle contraction       | 11 | 97  | 0.005 | 6442 sarcoglycan, alpha (50kDa dystrophin-associated glycoprotein)    |
| GO | muscle contraction       | 11 | 97  | 0.005 | 6546 solute carrier family 8 (sodium/calcium exchanger), member 1     |
| GO | muscle contraction       | 11 | 97  | 0.005 | 70 actin, alpha, cardiac muscle 1                                     |
| GO | muscle contraction       | 11 | 97  | 0.005 | 7168 tropomyosin 1 (alpha)                                            |
| GO | muscle contraction       | 11 | 97  | 0.005 | 7171 tropomyosin 4                                                    |
| GO | muscle contraction       | 11 | 97  | 0.005 | 9172 myomesin (M-protein) 2, 165kDa                                   |
| GO | induction of apoptosis   | 16 | 170 | 0.006 | 10293 TRAF interacting protein                                        |
| GO | induction of apoptosis   | 16 | 170 | 0.006 | 10395 deleted in liver cancer 1                                       |
| GO | induction of apoptosis   | 16 | 170 | 0.006 | 1984 eukaryotic translation initiation factor 5A                      |
| GO | induction of apoptosis   | 16 | 170 | 0.006 | 348 apolipoprotein E                                                  |
| GO | induction of apoptosis   | 16 | 170 | 0.006 | 355 Fas (TNF receptor superfamily, member 6)                          |
| GO | induction of apoptosis   | 16 | 170 | 0.006 | 3624 inhibin, beta A                                                  |
| GO | induction of apoptosis   | 16 | 170 | 0.006 | 3932 lymphocyte-specific protein tyrosine kinase                      |
| GO | induction of apoptosis   | 16 | 170 | 0.006 | 581 BCL2-associated X protein                                         |
| GO | induction of apoptosis   | 16 | 170 | 0.006 | 64393 zinc finger, matrin type 3                                      |
| GO | induction of apoptosis   | 16 | 170 | 0.006 | 666 BCL2-related ovarian killer                                       |
| GO | induction of apoptosis   | 16 | 170 | 0.006 | 7046 transforming growth factor, beta receptor 1                      |
| GO | induction of apoptosis   | 16 | 170 | 0.006 | 7490 Wilms tumor 1                                                    |
| GO | induction of apoptosis   | 16 | 170 | 0.006 | 8193 D4, zinc and double PHD fingers family 1                         |
| GO | induction of apoptosis   | 16 | 170 | 0.006 | 8626 tumor protein p63                                                |
| GO | induction of apoptosis   | 16 | 170 | 0.006 | 9262 serine/threonine kinase 17b                                      |

|    |                                            |    |     |       |       |                                                                               |
|----|--------------------------------------------|----|-----|-------|-------|-------------------------------------------------------------------------------|
| GO | induction of apoptosis                     | 16 | 170 | 0.006 | 94241 | tumor protein p53 inducible nuclear protein 1                                 |
| GO | collagen type V                            | 2  | 3   | 0.006 | 1289  | collagen, type V, alpha 1                                                     |
| GO | collagen type V                            | 2  | 3   | 0.006 | 1290  | collagen, type V, alpha 2                                                     |
| GO | branching morphogenesis of a nerve         | 2  | 3   | 0.006 | 1746  | distal-less homeobox 2                                                        |
| GO | branching morphogenesis of a nerve         | 2  | 3   | 0.006 | 2045  | EPH receptor A7                                                               |
| GO | 5'-flap endonuclease activity              | 2  | 3   | 0.006 | 1763  | DNA replication helicase 2 homolog (yeast)                                    |
| GO | 5'-flap endonuclease activity              | 2  | 3   | 0.006 | 2237  | flap structure-specific endonuclease 1                                        |
| GO | positive regulation of myeloid cell differ | 2  | 3   | 0.006 | 182   | jagged 1 (Alagille syndrome)                                                  |
| GO | positive regulation of myeloid cell differ | 2  | 3   | 0.006 | 3952  | leptin                                                                        |
| GO | positive regulation of muscle cell differe | 2  | 3   | 0.006 | 1984  | eukaryotic translation initiation factor 5A                                   |
| GO | positive regulation of muscle cell differe | 2  | 3   | 0.006 | 8536  | calcium/calmodulin-dependent protein kinase I                                 |
| GO | guanyl-nucleotide exchange factor com      | 2  | 3   | 0.006 | 25780 | RAS guanyl releasing protein 3 (calcium and DAG-regulated)                    |
| GO | guanyl-nucleotide exchange factor com      | 2  | 3   | 0.006 | 5140  | phosphodiesterase 3B, cGMP-inhibited                                          |
| GO | prostatic bud formation                    | 2  | 3   | 0.006 | 2736  | GLI family zinc finger 2                                                      |
| GO | prostatic bud formation                    | 2  | 3   | 0.006 | 8626  | tumor protein p63                                                             |
| GO | very-low-density lipoprotein particle cle  | 2  | 3   | 0.006 | 341   | apolipoprotein C-I                                                            |
| GO | very-low-density lipoprotein particle cle  | 2  | 3   | 0.006 | 348   | apolipoprotein E                                                              |
| GO | negative regulation of cell adhesion me    | 2  | 3   | 0.006 | 5054  | serpin peptidase inhibitor, clade E (nexin, plasminogen activator inhibitor t |
| GO | negative regulation of cell adhesion me    | 2  | 3   | 0.006 | 5140  | phosphodiesterase 3B, cGMP-inhibited                                          |
| GO | regulation of cyclin-dependent protein I   | 6  | 37  | 0.007 | 1026  | cyclin-dependent kinase inhibitor 1A (p21, Cip1)                              |
| GO | regulation of cyclin-dependent protein I   | 6  | 37  | 0.007 | 1164  | CDC28 protein kinase regulatory subunit 2                                     |
| GO | regulation of cyclin-dependent protein I   | 6  | 37  | 0.007 | 28984 | chromosome 13 open reading frame 15                                           |
| GO | regulation of cyclin-dependent protein I   | 6  | 37  | 0.007 | 2965  | general transcription factor IIH, polypeptide 1, 62kDa                        |
| GO | regulation of cyclin-dependent protein I   | 6  | 37  | 0.007 | 51191 | hect domain and RLD 5                                                         |
| GO | regulation of cyclin-dependent protein I   | 6  | 37  | 0.007 | 641   | Bloom syndrome, RecQ helicase-like                                            |
| GO | mitochondrial large ribosomal subunit      | 4  | 17  | 0.007 | 11222 | mitochondrial ribosomal protein L3                                            |
| GO | mitochondrial large ribosomal subunit      | 4  | 17  | 0.007 | 28998 | mitochondrial ribosomal protein L13                                           |
| GO | mitochondrial large ribosomal subunit      | 4  | 17  | 0.007 | 65003 | mitochondrial ribosomal protein L11                                           |
| GO | mitochondrial large ribosomal subunit      | 4  | 17  | 0.007 | 65008 | mitochondrial ribosomal protein L1                                            |
| GO | Notch binding                              | 3  | 9   | 0.007 | 10683 | delta-like 3 (Drosophila)                                                     |
| GO | Notch binding                              | 3  | 9   | 0.007 | 182   | jagged 1 (Alagille syndrome)                                                  |
| GO | Notch binding                              | 3  | 9   | 0.007 | 92737 | delta/notch-like EGF repeat containing                                        |
| GO | auditory receptor cell differentiation     | 3  | 9   | 0.007 | 182   | jagged 1 (Alagille syndrome)                                                  |
| GO | auditory receptor cell differentiation     | 3  | 9   | 0.007 | 3778  | potassium large conductance calcium-activated channel, subfamily M, alph      |
| GO | auditory receptor cell differentiation     | 3  | 9   | 0.007 | 55283 | mucolipin 3                                                                   |
| GO | female pregnancy                           | 8  | 61  | 0.007 | 2321  | fms-related tyrosine kinase 1 (vascular endothelial growth factor/vascular p  |



|    |                                        |   |    |       |        |                                                                            |
|----|----------------------------------------|---|----|-------|--------|----------------------------------------------------------------------------|
| GO | female pregnancy                       | 8 | 61 | 0.007 | 2878   | glutathione peroxidase 3 (plasma)                                          |
| GO | female pregnancy                       | 8 | 61 | 0.007 | 29842  | transcription factor CP2-like 1                                            |
| GO | female pregnancy                       | 8 | 61 | 0.007 | 3248   | hydroxyprostaglandin dehydrogenase 15-(NAD)                                |
| GO | female pregnancy                       | 8 | 61 | 0.007 | 5021   | oxytocin receptor                                                          |
| GO | female pregnancy                       | 8 | 61 | 0.007 | 5228   | placental growth factor                                                    |
| GO | female pregnancy                       | 8 | 61 | 0.007 | 5744   | parathyroid hormone-like hormone                                           |
| GO | female pregnancy                       | 8 | 61 | 0.007 | 6019   | relaxin 2                                                                  |
| GO | DNA-dependent ATPase activity          | 5 | 27 | 0.007 | 1161   | excision repair cross-complementing rodent repair deficiency, complement   |
| GO | DNA-dependent ATPase activity          | 5 | 27 | 0.007 | 2965   | general transcription factor IIH, polypeptide 1, 62kDa                     |
| GO | DNA-dependent ATPase activity          | 5 | 27 | 0.007 | 50485  | SWI/SNF related, matrix associated, actin dependent regulator of chromati  |
| GO | DNA-dependent ATPase activity          | 5 | 27 | 0.007 | 5889   | RAD51 homolog C ( <i>S. cerevisiae</i> )                                   |
| GO | DNA-dependent ATPase activity          | 5 | 27 | 0.007 | 8458   | transcription termination factor, RNA polymerase II                        |
| GO | sarcomere                              | 5 | 27 | 0.007 | 70     | actin, alpha, cardiac muscle 1                                             |
| GO | sarcomere                              | 5 | 27 | 0.007 | 7137   | troponin I type 3 (cardiac)                                                |
| GO | sarcomere                              | 5 | 27 | 0.007 | 7168   | tropomyosin 1 (alpha)                                                      |
| GO | sarcomere                              | 5 | 27 | 0.007 | 7220   | transient receptor potential cation channel, subfamily C, member 1         |
| GO | sarcomere                              | 5 | 27 | 0.007 | 84665  | myopalladin                                                                |
| GO | polypeptide N-acetylgalactosaminyltran | 4 | 18 | 0.008 | 11226  | UDP-N-acetyl-alpha-D-galactosamine:polypeptide N-acetylgalactosaminyltr    |
| GO | polypeptide N-acetylgalactosaminyltran | 4 | 18 | 0.008 | 11227  | UDP-N-acetyl-alpha-D-galactosamine:polypeptide N-acetylgalactosaminyltr    |
| GO | polypeptide N-acetylgalactosaminyltran | 4 | 18 | 0.008 | 114805 | UDP-N-acetyl-alpha-D-galactosamine:polypeptide N-acetylgalactosaminyltr    |
| GO | polypeptide N-acetylgalactosaminyltran | 4 | 18 | 0.008 | 79623  | UDP-N-acetyl-alpha-D-galactosamine:polypeptide N-acetylgalactosaminyltr    |
| GO | pituitary gland development            | 4 | 18 | 0.008 | 220    | aldehyde dehydrogenase 1 family, member A3                                 |
| GO | pituitary gland development            | 4 | 18 | 0.008 | 2736   | GLI family zinc finger 2                                                   |
| GO | pituitary gland development            | 4 | 18 | 0.008 | 6299   | sal-like 1 ( <i>Drosophila</i> )                                           |
| GO | pituitary gland development            | 4 | 18 | 0.008 | 6657   | SRY (sex determining region Y)-box 2                                       |
| GO | actin filament                         | 5 | 28 | 0.009 | 10096  | ARP3 actin-related protein 3 homolog (yeast)                               |
| GO | actin filament                         | 5 | 28 | 0.009 | 10395  | deleted in liver cancer 1                                                  |
| GO | actin filament                         | 5 | 28 | 0.009 | 3936   | lymphocyte cytosolic protein 1 (L-plastin)                                 |
| GO | actin filament                         | 5 | 28 | 0.009 | 70     | actin, alpha, cardiac muscle 1                                             |
| GO | actin filament                         | 5 | 28 | 0.009 | 7456   | WAS/WASL interacting protein family, member 1                              |
| GO | CTP biosynthetic process               | 3 | 10 | 0.009 | 1503   | CTP synthase                                                               |
| GO | CTP biosynthetic process               | 3 | 10 | 0.009 | 29922  | non-metastatic cells 7, protein expressed in (nucleoside-diphosphate kinas |
| GO | CTP biosynthetic process               | 3 | 10 | 0.009 | 4830   | non-metastatic cells 1, protein (NM23A) expressed in                       |
| GO | embryonic digestive tract development  | 3 | 10 | 0.009 | 2736   | GLI family zinc finger 2                                                   |
| GO | embryonic digestive tract development  | 3 | 10 | 0.009 | 5125   | proprotein convertase subtilisin/kexin type 5                              |
| GO | embryonic digestive tract development  | 3 | 10 | 0.009 | 6299   | sal-like 1 ( <i>Drosophila</i> )                                           |

|    |                                          |    |     |       |        |                                                                               |
|----|------------------------------------------|----|-----|-------|--------|-------------------------------------------------------------------------------|
| GO | negative regulation of blood coagulation | 3  | 10  | 0.009 | 348    | apolipoprotein E                                                              |
| GO | negative regulation of blood coagulation | 3  | 10  | 0.009 | 5054   | serpin peptidase inhibitor, clade E (nexin, plasminogen activator inhibitor t |
| GO | negative regulation of blood coagulation | 3  | 10  | 0.009 | 5624   | protein C (inactivator of coagulation factors Va and VIIIa)                   |
| GO | actin cytoskeleton                       | 13 | 134 | 0.01  | 10096  | ARP3 actin-related protein 3 homolog (yeast)                                  |
| GO | actin cytoskeleton                       | 13 | 134 | 0.01  | 10097  | ARP2 actin-related protein 2 homolog (yeast)                                  |
| GO | actin cytoskeleton                       | 13 | 134 | 0.01  | 10391  | coronin, actin binding protein, 2B                                            |
| GO | actin cytoskeleton                       | 13 | 134 | 0.01  | 10788  | IQ motif containing GTPase activating protein 2                               |
| GO | actin cytoskeleton                       | 13 | 134 | 0.01  | 1496   | catenin (cadherin-associated protein), alpha 2                                |
| GO | actin cytoskeleton                       | 13 | 134 | 0.01  | 5216   | profilin 1                                                                    |
| GO | actin cytoskeleton                       | 13 | 134 | 0.01  | 59     | actin, alpha 2, smooth muscle, aorta                                          |
| GO | actin cytoskeleton                       | 13 | 134 | 0.01  | 6525   | smoothelin                                                                    |
| GO | actin cytoskeleton                       | 13 | 134 | 0.01  | 7168   | tropomyosin 1 (alpha)                                                         |
| GO | actin cytoskeleton                       | 13 | 134 | 0.01  | 7456   | WAS/WASL interacting protein family, member 1                                 |
| GO | actin cytoskeleton                       | 13 | 134 | 0.01  | 8997   | kalirin, RhoGEF kinase                                                        |
| GO | actin cytoskeleton                       | 13 | 134 | 0.01  | 9260   | PDZ and LIM domain 7 (enigma)                                                 |
| GO | actin cytoskeleton                       | 13 | 134 | 0.01  | 9262   | serine/threonine kinase 17b                                                   |
| GO | mRNA export from nucleus                 | 5  | 29  | 0.01  | 10189  | THO complex 4                                                                 |
| GO | mRNA export from nucleus                 | 5  | 29  | 0.01  | 10212  | DEAD (Asp-Glu-Ala-Asp) box polypeptide 39                                     |
| GO | mRNA export from nucleus                 | 5  | 29  | 0.01  | 1984   | eukaryotic translation initiation factor 5A                                   |
| GO | mRNA export from nucleus                 | 5  | 29  | 0.01  | 26019  | UPF2 regulator of nonsense transcripts homolog (yeast)                        |
| GO | mRNA export from nucleus                 | 5  | 29  | 0.01  | 8563   | THO complex 5                                                                 |
| GO | chromosome                               | 13 | 135 | 0.01  | 10051  | structural maintenance of chromosomes 4                                       |
| GO | chromosome                               | 13 | 135 | 0.01  | 3149   | high-mobility group box 3                                                     |
| GO | chromosome                               | 13 | 135 | 0.01  | 387103 | centromere protein W                                                          |
| GO | chromosome                               | 13 | 135 | 0.01  | 55215  | Fanconi anemia, complementation group I                                       |
| GO | chromosome                               | 13 | 135 | 0.01  | 55506  | H2A histone family, member Y2                                                 |
| GO | chromosome                               | 13 | 135 | 0.01  | 6672   | SP100 nuclear antigen                                                         |
| GO | chromosome                               | 13 | 135 | 0.01  | 79172  | centromere protein O                                                          |
| GO | chromosome                               | 13 | 135 | 0.01  | 79677  | structural maintenance of chromosomes 6                                       |
| GO | chromosome                               | 13 | 135 | 0.01  | 79682  | MLF1 interacting protein                                                      |
| GO | chromosome                               | 13 | 135 | 0.01  | 8091   | high mobility group AT-hook 2                                                 |
| GO | chromosome                               | 13 | 135 | 0.01  | 8348   | histone cluster 1, H2bo                                                       |
| GO | chromosome                               | 13 | 135 | 0.01  | 8349   | histone cluster 2, H2be                                                       |
| GO | chromosome                               | 13 | 135 | 0.01  | 8970   | histone cluster 1, H2bj                                                       |
| GO | methyltransferase activity               | 11 | 106 | 0.01  | 131965 | methyltransferase like 6                                                      |
| GO | methyltransferase activity               | 11 | 106 | 0.01  | 149281 | methyltransferase like 11B                                                    |

|    |                                              |    |     |       |        |                                                                                        |
|----|----------------------------------------------|----|-----|-------|--------|----------------------------------------------------------------------------------------|
| GO | methyltransferase activity                   | 11 | 106 | 0.01  | 1787   | tRNA aspartic acid methyltransferase 1                                                 |
| GO | methyltransferase activity                   | 11 | 106 | 0.01  | 1788   | DNA (cytosine-5-)-methyltransferase 3 alpha                                            |
| GO | methyltransferase activity                   | 11 | 106 | 0.01  | 2618   | phosphoribosylglycinamide formyltransferase, phosphoribosylglycinamide                 |
| GO | methyltransferase activity                   | 11 | 106 | 0.01  | 3276   | protein arginine methyltransferase 1                                                   |
| GO | methyltransferase activity                   | 11 | 106 | 0.01  | 345630 | fibrillarin-like 1                                                                     |
| GO | methyltransferase activity                   | 11 | 106 | 0.01  | 5110   | protein-L-isoaspartate (D-aspartate) O-methyltransferase                               |
| GO | methyltransferase activity                   | 11 | 106 | 0.01  | 56339  | methyltransferase like 3                                                               |
| GO | methyltransferase activity                   | 11 | 106 | 0.01  | 7298   | thymidylate synthetase                                                                 |
| GO | methyltransferase activity                   | 11 | 106 | 0.01  | 91801  | alkB, alkylation repair homolog 8 (E. coli)                                            |
| GO | heterophilic cell-cell adhesion              | 4  | 19  | 0.01  | 1000   | cadherin 2, type 1, N-cadherin (neuronal)                                              |
| GO | heterophilic cell-cell adhesion              | 4  | 19  | 0.01  | 1002   | cadherin 4, type 1, R-cadherin (retinal)                                               |
| GO | heterophilic cell-cell adhesion              | 4  | 19  | 0.01  | 23705  | cell adhesion molecule 1                                                               |
| GO | heterophilic cell-cell adhesion              | 4  | 19  | 0.01  | 347902 | adhesion molecule with Ig-like domain 2                                                |
| GO | collagen catabolic process                   | 4  | 19  | 0.01  | 4312   | matrix metalloproteinase 1 (interstitial collagenase)                                  |
| GO | collagen catabolic process                   | 4  | 19  | 0.01  | 4318   | matrix metalloproteinase 9 (gelatinase B, 92kDa gelatinase, 92kDa type IV collagenase) |
| GO | collagen catabolic process                   | 4  | 19  | 0.01  | 4319   | matrix metalloproteinase 10 (stromelysin 2)                                            |
| GO | collagen catabolic process                   | 4  | 19  | 0.01  | 5184   | peptidase D                                                                            |
| GO | basolateral plasma membrane                  | 11 | 107 | 0.011 | 1496   | catenin (cadherin-associated protein), alpha 2                                         |
| GO | basolateral plasma membrane                  | 11 | 107 | 0.011 | 23705  | cell adhesion molecule 1                                                               |
| GO | basolateral plasma membrane                  | 11 | 107 | 0.011 | 287    | ankyrin 2, neuronal                                                                    |
| GO | basolateral plasma membrane                  | 11 | 107 | 0.011 | 5028   | purinergic receptor P2Y, G-protein coupled, 1                                          |
| GO | basolateral plasma membrane                  | 11 | 107 | 0.011 | 5031   | pyrimidinergic receptor P2Y, G-protein coupled, 6                                      |
| GO | basolateral plasma membrane                  | 11 | 107 | 0.011 | 6580   | solute carrier family 22 (organic cation transporter), member 1                        |
| GO | basolateral plasma membrane                  | 11 | 107 | 0.011 | 7010   | TEK tyrosine kinase, endothelial                                                       |
| GO | basolateral plasma membrane                  | 11 | 107 | 0.011 | 7046   | transforming growth factor, beta receptor 1                                            |
| GO | basolateral plasma membrane                  | 11 | 107 | 0.011 | 7220   | transient receptor potential cation channel, subfamily C, member 1                     |
| GO | basolateral plasma membrane                  | 11 | 107 | 0.011 | 9053   | microtubule-associated protein 7                                                       |
| GO | basolateral plasma membrane                  | 11 | 107 | 0.011 | 9497   | solute carrier family 4, sodium bicarbonate cotransporter, member 7                    |
| GO | eye morphogenesis                            | 2  | 4   | 0.012 | 1289   | collagen, type V, alpha 1                                                              |
| GO | eye morphogenesis                            | 2  | 4   | 0.012 | 1290   | collagen, type V, alpha 2                                                              |
| GO | apicolateral plasma membrane                 | 2  | 4   | 0.012 | 166336 | prickle homolog 2 (Drosophila)                                                         |
| GO | apicolateral plasma membrane                 | 2  | 4   | 0.012 | 4734   | neural precursor cell expressed, developmentally down-regulated 4                      |
| GO | DNA (cytosine-5-)-methyltransferase activity | 2  | 4   | 0.012 | 1787   | tRNA aspartic acid methyltransferase 1                                                 |
| GO | DNA (cytosine-5-)-methyltransferase activity | 2  | 4   | 0.012 | 1788   | DNA (cytosine-5-)-methyltransferase 3 alpha                                            |
| GO | lipoygenase pathway                          | 2  | 4   | 0.012 | 241    | arachidonate 5-lipoxygenase-activating protein                                         |
| GO | lipoygenase pathway                          | 2  | 4   | 0.012 | 3248   | hydroxyprostaglandin dehydrogenase 15-(NAD)                                            |

|    |                                          |   |    |       |        |                                                                               |
|----|------------------------------------------|---|----|-------|--------|-------------------------------------------------------------------------------|
| GO | DNA-directed RNA polymerase I comple     | 2 | 4  | 0.012 | 25885  | polymerase (RNA) I polypeptide A, 194kDa                                      |
| GO | DNA-directed RNA polymerase I comple     | 2 | 4  | 0.012 | 84172  | polymerase (RNA) I polypeptide B, 128kDa                                      |
| GO | chylomicron remnant clearance            | 2 | 4  | 0.012 | 341    | apolipoprotein C-I                                                            |
| GO | chylomicron remnant clearance            | 2 | 4  | 0.012 | 348    | apolipoprotein E                                                              |
| GO | regulation of axon extension             | 2 | 4  | 0.012 | 348    | apolipoprotein E                                                              |
| GO | regulation of axon extension             | 2 | 4  | 0.012 | 4897   | neuronal cell adhesion molecule                                               |
| GO | saliva secretion                         | 2 | 4  | 0.012 | 3778   | potassium large conductance calcium-activated channel, subfamily M, alph      |
| GO | saliva secretion                         | 2 | 4  | 0.012 | 7220   | transient receptor potential cation channel, subfamily C, member 1            |
| GO | regulation of DNA recombination          | 2 | 4  | 0.012 | 3836   | karyopherin alpha 1 (importin alpha 5)                                        |
| GO | regulation of DNA recombination          | 2 | 4  | 0.012 | 3838   | karyopherin alpha 2 (RAG cohort 1, importin alpha 1)                          |
| GO | response to methylmercury                | 2 | 4  | 0.012 | 411    | arylsulfatase B                                                               |
| GO | response to methylmercury                | 2 | 4  | 0.012 | 898    | cyclin E1                                                                     |
| GO | guanine/thymine mispair binding          | 2 | 4  | 0.012 | 4292   | mutL homolog 1, colon cancer, nonpolyposis type 2 (E. coli)                   |
| GO | guanine/thymine mispair binding          | 2 | 4  | 0.012 | 4436   | mutS homolog 2, colon cancer, nonpolyposis type 1 (E. coli)                   |
| GO | regulation of G2/M transition of mitotic | 2 | 4  | 0.012 | 5569   | protein kinase (cAMP-dependent, catalytic) inhibitor alpha                    |
| GO | regulation of G2/M transition of mitotic | 2 | 4  | 0.012 | 5588   | protein kinase C, theta                                                       |
| GO | ATP-dependent 3'-5' DNA helicase activi  | 2 | 4  | 0.012 | 5965   | RecQ protein-like (DNA helicase Q1-like)                                      |
| GO | ATP-dependent 3'-5' DNA helicase activi  | 2 | 4  | 0.012 | 641    | Bloom syndrome, RecQ helicase-like                                            |
| GO | DNA strand annealing activity            | 2 | 4  | 0.012 | 5965   | RecQ protein-like (DNA helicase Q1-like)                                      |
| GO | DNA strand annealing activity            | 2 | 4  | 0.012 | 641    | Bloom syndrome, RecQ helicase-like                                            |
| GO | muscle thin filament tropomyosin         | 2 | 4  | 0.012 | 7168   | tropomyosin 1 (alpha)                                                         |
| GO | muscle thin filament tropomyosin         | 2 | 4  | 0.012 | 7171   | tropomyosin 4                                                                 |
| GO | gamma-aminobutyric acid signaling patl   | 4 | 20 | 0.012 | 200959 | gamma-aminobutyric acid (GABA) receptor, rho 3                                |
| GO | gamma-aminobutyric acid signaling patl   | 4 | 20 | 0.012 | 2558   | gamma-aminobutyric acid (GABA) A receptor, alpha 5                            |
| GO | gamma-aminobutyric acid signaling patl   | 4 | 20 | 0.012 | 773    | calcium channel, voltage-dependent, P/Q type, alpha 1A subunit                |
| GO | gamma-aminobutyric acid signaling patl   | 4 | 20 | 0.012 | 9568   | gamma-aminobutyric acid (GABA) B receptor, 2                                  |
| GO | tissue regeneration                      | 4 | 20 | 0.012 | 2628   | glycine amidinotransferase (L-arginine:glycine amidinotransferase)            |
| GO | tissue regeneration                      | 4 | 20 | 0.012 | 5054   | serpin peptidase inhibitor, clade E (nexin, plasminogen activator inhibitor t |
| GO | tissue regeneration                      | 4 | 20 | 0.012 | 5588   | protein kinase C, theta                                                       |
| GO | tissue regeneration                      | 4 | 20 | 0.012 | 7078   | TIMP metallopeptidase inhibitor 3                                             |
| GO | transforming growth factor beta recepti  | 3 | 11 | 0.012 | 4052   | latent transforming growth factor beta binding protein 1                      |
| GO | transforming growth factor beta recepti  | 3 | 11 | 0.012 | 659    | bone morphogenetic protein receptor, type II (serine/threonine kinase)        |
| GO | transforming growth factor beta recepti  | 3 | 11 | 0.012 | 7046   | transforming growth factor, beta receptor 1                                   |
| GO | negative regulation of DNA binding       | 3 | 11 | 0.012 | 58499  | zinc finger protein 462                                                       |
| GO | negative regulation of DNA binding       | 3 | 11 | 0.012 | 6672   | SP100 nuclear antigen                                                         |
| GO | negative regulation of DNA binding       | 3 | 11 | 0.012 | 7341   | SMT3 suppressor of mif two 3 homolog 1 (S. cerevisiae)                        |

|    |                                            |     |      |       |                                                                               |
|----|--------------------------------------------|-----|------|-------|-------------------------------------------------------------------------------|
| GO | positive regulation of endothelial cell pr | 5   | 31   | 0.013 | 5228 placental growth factor                                                  |
| GO | positive regulation of endothelial cell pr | 5   | 31   | 0.013 | 6347 chemokine (C-C motif) ligand 2                                           |
| GO | positive regulation of endothelial cell pr | 5   | 31   | 0.013 | 659 bone morphogenetic protein receptor, type II (serine/threonine kinase)    |
| GO | positive regulation of endothelial cell pr | 5   | 31   | 0.013 | 7857 secretogranin II (chromogranin C)                                        |
| GO | positive regulation of endothelial cell pr | 5   | 31   | 0.013 | 79805 vasohibin 2                                                             |
| GO | protein binding                            | 321 | 6249 | 0.014 | 1000 cadherin 2, type 1, N-cadherin (neuronal)                                |
| GO | protein binding                            | 321 | 6249 | 0.014 | 10000 v-akt murine thymoma viral oncogene homolog 3 (protein kinase B, gamma) |
| GO | protein binding                            | 321 | 6249 | 0.014 | 10051 structural maintenance of chromosomes 4                                 |
| GO | protein binding                            | 321 | 6249 | 0.014 | 10052 gap junction protein, gamma 1, 45kDa                                    |
| GO | protein binding                            | 321 | 6249 | 0.014 | 10055 SUMO1 activating enzyme subunit 1                                       |
| GO | protein binding                            | 321 | 6249 | 0.014 | 10096 ARP3 actin-related protein 3 homolog (yeast)                            |
| GO | protein binding                            | 321 | 6249 | 0.014 | 10097 ARP2 actin-related protein 2 homolog (yeast)                            |
| GO | protein binding                            | 321 | 6249 | 0.014 | 10189 THO complex 4                                                           |
| GO | protein binding                            | 321 | 6249 | 0.014 | 10190 thioredoxin domain containing 9                                         |
| GO | protein binding                            | 321 | 6249 | 0.014 | 10199 M-phase phosphoprotein 10 (U3 small nucleolar ribonucleoprotein)        |
| GO | protein binding                            | 321 | 6249 | 0.014 | 10212 DEAD (Asp-Glu-Ala-Asp) box polypeptide 39                               |
| GO | protein binding                            | 321 | 6249 | 0.014 | 10213 proteasome (prosome, macropain) 26S subunit, non-ATPase, 14             |
| GO | protein binding                            | 321 | 6249 | 0.014 | 10254 signal transducing adaptor molecule (SH3 domain and ITAM motif) 2       |
| GO | protein binding                            | 321 | 6249 | 0.014 | 1026 cyclin-dependent kinase inhibitor 1A (p21, Cip1)                         |
| GO | protein binding                            | 321 | 6249 | 0.014 | 10293 TRAF interacting protein                                                |
| GO | protein binding                            | 321 | 6249 | 0.014 | 10395 deleted in liver cancer 1                                               |
| GO | protein binding                            | 321 | 6249 | 0.014 | 1045 caudal type homeobox 2                                                   |
| GO | protein binding                            | 321 | 6249 | 0.014 | 10465 peptidylprolyl isomerase H (cyclophilin H)                              |
| GO | protein binding                            | 321 | 6249 | 0.014 | 10474 transcriptional adaptor 3                                               |
| GO | protein binding                            | 321 | 6249 | 0.014 | 10492 synaptotagmin binding, cytoplasmic RNA interacting protein              |
| GO | protein binding                            | 321 | 6249 | 0.014 | 10528 NOP56 ribonucleoprotein homolog (yeast)                                 |
| GO | protein binding                            | 321 | 6249 | 0.014 | 10539 glutaredoxin 3                                                          |
| GO | protein binding                            | 321 | 6249 | 0.014 | 10612 tripartite motif-containing 3                                           |
| GO | protein binding                            | 321 | 6249 | 0.014 | 10656 KH domain containing, RNA binding, signal transduction associated 3     |
| GO | protein binding                            | 321 | 6249 | 0.014 | 10672 guanine nucleotide binding protein (G protein), alpha 13                |
| GO | protein binding                            | 321 | 6249 | 0.014 | 10683 delta-like 3 (Drosophila)                                               |
| GO | protein binding                            | 321 | 6249 | 0.014 | 10785 WD repeat domain 4                                                      |
| GO | protein binding                            | 321 | 6249 | 0.014 | 10788 IQ motif containing GTPase activating protein 2                         |
| GO | protein binding                            | 321 | 6249 | 0.014 | 10799 ribonuclease P/MRP 40kDa subunit                                        |
| GO | protein binding                            | 321 | 6249 | 0.014 | 10890 RAB10, member RAS oncogene family                                       |
| GO | protein binding                            | 321 | 6249 | 0.014 | 11142 protein kinase (cAMP-dependent, catalytic) inhibitor gamma              |

|    |                 |     |      |       |        |                                                                               |
|----|-----------------|-----|------|-------|--------|-------------------------------------------------------------------------------|
| GO | protein binding | 321 | 6249 | 0.014 | 11154  | adaptor-related protein complex 4, sigma 1 subunit                            |
| GO | protein binding | 321 | 6249 | 0.014 | 1121   | choroideremia (Rab escort protein 1)                                          |
| GO | protein binding | 321 | 6249 | 0.014 | 1123   | chimerin (chimaerin) 1                                                        |
| GO | protein binding | 321 | 6249 | 0.014 | 114088 | tripartite motif-containing 9                                                 |
| GO | protein binding | 321 | 6249 | 0.014 | 114804 | ring finger protein 157                                                       |
| GO | protein binding | 321 | 6249 | 0.014 | 115290 | F-box protein 17                                                              |
| GO | protein binding | 321 | 6249 | 0.014 | 1161   | excision repair cross-complementing rodent repair deficiency, complement      |
| GO | protein binding | 321 | 6249 | 0.014 | 118788 | phosphoinositide-3-kinase adaptor protein 1                                   |
| GO | protein binding | 321 | 6249 | 0.014 | 118924 | chromosome 10 open reading frame 4                                            |
| GO | protein binding | 321 | 6249 | 0.014 | 12     | serpin peptidase inhibitor, clade A (alpha-1 antiproteinase, antitrypsin), me |
| GO | protein binding | 321 | 6249 | 0.014 | 121268 | Ras homolog enriched in brain like 1                                          |
| GO | protein binding | 321 | 6249 | 0.014 | 1282   | collagen, type IV, alpha 1                                                    |
| GO | protein binding | 321 | 6249 | 0.014 | 1284   | collagen, type IV, alpha 2                                                    |
| GO | protein binding | 321 | 6249 | 0.014 | 1288   | collagen, type IV, alpha 6                                                    |
| GO | protein binding | 321 | 6249 | 0.014 | 128853 | dual specificity phosphatase 15                                               |
| GO | protein binding | 321 | 6249 | 0.014 | 1289   | collagen, type V, alpha 1                                                     |
| GO | protein binding | 321 | 6249 | 0.014 | 132158 | glycerate kinase                                                              |
| GO | protein binding | 321 | 6249 | 0.014 | 140739 | ubiquitin-conjugating enzyme E2F (putative)                                   |
| GO | protein binding | 321 | 6249 | 0.014 | 146760 | reticulon 4 receptor-like 1                                                   |
| GO | protein binding | 321 | 6249 | 0.014 | 1496   | catenin (cadherin-associated protein), alpha 2                                |
| GO | protein binding | 321 | 6249 | 0.014 | 1503   | CTP synthase                                                                  |
| GO | protein binding | 321 | 6249 | 0.014 | 150684 | copper metabolism (Murr1) domain containing 1                                 |
| GO | protein binding | 321 | 6249 | 0.014 | 151188 | ADP-ribosylation-like factor 6 interacting protein 6                          |
| GO | protein binding | 321 | 6249 | 0.014 | 157773 | chromosome 8 open reading frame 48                                            |
| GO | protein binding | 321 | 6249 | 0.014 | 1643   | damage-specific DNA binding protein 2, 48kDa                                  |
| GO | protein binding | 321 | 6249 | 0.014 | 1687   | deafness, autosomal dominant 5                                                |
| GO | protein binding | 321 | 6249 | 0.014 | 170082 | transcription elongation factor A (SII) N-terminal and central domain contai  |
| GO | protein binding | 321 | 6249 | 0.014 | 1746   | distal-less homeobox 2                                                        |
| GO | protein binding | 321 | 6249 | 0.014 | 1775   | deoxyribonuclease I-like 2                                                    |
| GO | protein binding | 321 | 6249 | 0.014 | 1781   | dynein, cytoplasmic 1, intermediate chain 2                                   |
| GO | protein binding | 321 | 6249 | 0.014 | 1788   | DNA (cytosine-5-)-methyltransferase 3 alpha                                   |
| GO | protein binding | 321 | 6249 | 0.014 | 182    | jagged 1 (Alagille syndrome)                                                  |
| GO | protein binding | 321 | 6249 | 0.014 | 1984   | eukaryotic translation initiation factor 5A                                   |
| GO | protein binding | 321 | 6249 | 0.014 | 203    | adenylate kinase 1                                                            |
| GO | protein binding | 321 | 6249 | 0.014 | 2037   | erythrocyte membrane protein band 4.1-like 2                                  |
| GO | protein binding | 321 | 6249 | 0.014 | 2045   | EPH receptor A7                                                               |

|    |                 |     |      |       |                                                                              |
|----|-----------------|-----|------|-------|------------------------------------------------------------------------------|
| GO | protein binding | 321 | 6249 | 0.014 | 2139 eyes absent homolog 2 (Drosophila)                                      |
| GO | protein binding | 321 | 6249 | 0.014 | 2149 coagulation factor II (thrombin) receptor                               |
| GO | protein binding | 321 | 6249 | 0.014 | 2151 coagulation factor II (thrombin) receptor-like 2                        |
| GO | protein binding | 321 | 6249 | 0.014 | 2171 fatty acid binding protein 5 (psoriasis-associated)                     |
| GO | protein binding | 321 | 6249 | 0.014 | 220134 spindle and kinetochore associated complex subunit 1                  |
| GO | protein binding | 321 | 6249 | 0.014 | 221687 ring finger protein 182                                               |
| GO | protein binding | 321 | 6249 | 0.014 | 2232 ferredoxin reductase                                                    |
| GO | protein binding | 321 | 6249 | 0.014 | 2237 flap structure-specific endonuclease 1                                  |
| GO | protein binding | 321 | 6249 | 0.014 | 2242 feline sarcoma oncogene                                                 |
| GO | protein binding | 321 | 6249 | 0.014 | 2264 fibroblast growth factor receptor 4                                     |
| GO | protein binding | 321 | 6249 | 0.014 | 2273 four and a half LIM domains 1                                           |
| GO | protein binding | 321 | 6249 | 0.014 | 2281 FK506 binding protein 1B, 12.6 kDa                                      |
| GO | protein binding | 321 | 6249 | 0.014 | 22891 zinc finger protein 365                                                |
| GO | protein binding | 321 | 6249 | 0.014 | 2305 forkhead box M1                                                         |
| GO | protein binding | 321 | 6249 | 0.014 | 23136 erythrocyte membrane protein band 4.1-like 3                           |
| GO | protein binding | 321 | 6249 | 0.014 | 23157 septin 6                                                               |
| GO | protein binding | 321 | 6249 | 0.014 | 23194 F-box and leucine-rich repeat protein 7                                |
| GO | protein binding | 321 | 6249 | 0.014 | 23305 acyl-CoA synthetase long-chain family member 6                         |
| GO | protein binding | 321 | 6249 | 0.014 | 23594 origin recognition complex, subunit 6 like (yeast)                     |
| GO | protein binding | 321 | 6249 | 0.014 | 23658 LSM5 homolog, U6 small nuclear RNA associated ( <i>S. cerevisiae</i> ) |
| GO | protein binding | 321 | 6249 | 0.014 | 241 arachidonate 5-lipoxygenase-activating protein                           |
| GO | protein binding | 321 | 6249 | 0.014 | 2533 FYN binding protein (FYB-120/130)                                       |
| GO | protein binding | 321 | 6249 | 0.014 | 2534 FYN oncogene related to SRC, FGR, YES                                   |
| GO | protein binding | 321 | 6249 | 0.014 | 25780 RAS guanyl releasing protein 3 (calcium and DAG-regulated)             |
| GO | protein binding | 321 | 6249 | 0.014 | 25827 F-box and leucine-rich repeat protein 2                                |
| GO | protein binding | 321 | 6249 | 0.014 | 25885 polymerase (RNA) I polypeptide A, 194kDa                               |
| GO | protein binding | 321 | 6249 | 0.014 | 26019 UPF2 regulator of nonsense transcripts homolog (yeast)                 |
| GO | protein binding | 321 | 6249 | 0.014 | 26059 ELKS/RAB6-interacting/CAST family member 2                             |
| GO | protein binding | 321 | 6249 | 0.014 | 2618 phosphoribosylglycinamide formyltransferase, phosphoribosylglycinamide  |
| GO | protein binding | 321 | 6249 | 0.014 | 26207 phosphatidylinositol transfer protein, cytoplasmic 1                   |
| GO | protein binding | 321 | 6249 | 0.014 | 26230 T-cell lymphoma invasion and metastasis 2                              |
| GO | protein binding | 321 | 6249 | 0.014 | 26275 3-hydroxyisobutyryl-Coenzyme A hydrolase                               |
| GO | protein binding | 321 | 6249 | 0.014 | 2628 glycine amidinotransferase (L-arginine:glycine amidinotransferase)      |
| GO | protein binding | 321 | 6249 | 0.014 | 26519 translocase of inner mitochondrial membrane 10 homolog (yeast)         |
| GO | protein binding | 321 | 6249 | 0.014 | 26521 translocase of inner mitochondrial membrane 8 homolog B (yeast)        |
| GO | protein binding | 321 | 6249 | 0.014 | 26577 procollagen C-endopeptidase enhancer 2                                 |

|    |                 |     |      |       |        |                                                                           |
|----|-----------------|-----|------|-------|--------|---------------------------------------------------------------------------|
| GO | protein binding | 321 | 6249 | 0.014 | 26999  | cytoplasmic FMR1 interacting protein 2                                    |
| GO | protein binding | 321 | 6249 | 0.014 | 27258  | LSM3 homolog, U6 small nuclear RNA associated ( <i>S. cerevisiae</i> )    |
| GO | protein binding | 321 | 6249 | 0.014 | 27289  | Rho family GTPase 1                                                       |
| GO | protein binding | 321 | 6249 | 0.014 | 2736   | GLI family zinc finger 2                                                  |
| GO | protein binding | 321 | 6249 | 0.014 | 27429  | HtrA serine peptidase 2                                                   |
| GO | protein binding | 321 | 6249 | 0.014 | 287    | ankyrin 2, neuronal                                                       |
| GO | protein binding | 321 | 6249 | 0.014 | 28984  | chromosome 13 open reading frame 15                                       |
| GO | protein binding | 321 | 6249 | 0.014 | 2906   | glutamate receptor, ionotropic, N-methyl D-aspartate 2D                   |
| GO | protein binding | 321 | 6249 | 0.014 | 29128  | ubiquitin-like with PHD and ring finger domains 1                         |
| GO | protein binding | 321 | 6249 | 0.014 | 2965   | general transcription factor IIH, polypeptide 1, 62kDa                    |
| GO | protein binding | 321 | 6249 | 0.014 | 29887  | sorting nexin 10                                                          |
| GO | protein binding | 321 | 6249 | 0.014 | 29995  | LIM and cysteine-rich domains 1                                           |
| GO | protein binding | 321 | 6249 | 0.014 | 30011  | SH3-domain kinase binding protein 1                                       |
| GO | protein binding | 321 | 6249 | 0.014 | 3028   | hydroxysteroid (17-beta) dehydrogenase 10                                 |
| GO | protein binding | 321 | 6249 | 0.014 | 309    | annexin A6                                                                |
| GO | protein binding | 321 | 6249 | 0.014 | 3183   | heterogeneous nuclear ribonucleoprotein C (C1/C2)                         |
| GO | protein binding | 321 | 6249 | 0.014 | 3224   | homeobox C8                                                               |
| GO | protein binding | 321 | 6249 | 0.014 | 3236   | homeobox D10                                                              |
| GO | protein binding | 321 | 6249 | 0.014 | 3276   | protein arginine methyltransferase 1                                      |
| GO | protein binding | 321 | 6249 | 0.014 | 332    | baculoviral IAP repeat-containing 5                                       |
| GO | protein binding | 321 | 6249 | 0.014 | 3336   | heat shock 10kDa protein 1 (chaperonin 10)                                |
| GO | protein binding | 321 | 6249 | 0.014 | 344805 | transmembrane protease, serine 7                                          |
| GO | protein binding | 321 | 6249 | 0.014 | 347902 | adhesion molecule with Ig-like domain 2                                   |
| GO | protein binding | 321 | 6249 | 0.014 | 348    | apolipoprotein E                                                          |
| GO | protein binding | 321 | 6249 | 0.014 | 3516   | recombination signal binding protein for immunoglobulin kappa J region    |
| GO | protein binding | 321 | 6249 | 0.014 | 353091 | retinoic acid early transcript 1G                                         |
| GO | protein binding | 321 | 6249 | 0.014 | 355    | Fas (TNF receptor superfamily, member 6)                                  |
| GO | protein binding | 321 | 6249 | 0.014 | 3557   | interleukin 1 receptor antagonist                                         |
| GO | protein binding | 321 | 6249 | 0.014 | 3624   | inhibin, beta A                                                           |
| GO | protein binding | 321 | 6249 | 0.014 | 3685   | integrin, alpha V (vitronectin receptor, alpha polypeptide, antigen CD51) |
| GO | protein binding | 321 | 6249 | 0.014 | 3751   | potassium voltage-gated channel, Shal-related subfamily, member 2         |
| GO | protein binding | 321 | 6249 | 0.014 | 3754   | potassium voltage-gated channel, subfamily F, member 1                    |
| GO | protein binding | 321 | 6249 | 0.014 | 3763   | potassium inwardly-rectifying channel, subfamily J, member 6              |
| GO | protein binding | 321 | 6249 | 0.014 | 3778   | potassium large conductance calcium-activated channel, subfamily M, alpha |
| GO | protein binding | 321 | 6249 | 0.014 | 3800   | kinesin family member 5C                                                  |
| GO | protein binding | 321 | 6249 | 0.014 | 3836   | karyopherin alpha 1 (importin alpha 5)                                    |



|    |                 |     |      |       |                                                                                             |
|----|-----------------|-----|------|-------|---------------------------------------------------------------------------------------------|
| GO | protein binding | 321 | 6249 | 0.014 | 3838 karyopherin alpha 2 (RAG cohort 1, importin alpha 1)                                   |
| GO | protein binding | 321 | 6249 | 0.014 | 3883 keratin 33A                                                                            |
| GO | protein binding | 321 | 6249 | 0.014 | 3887 keratin 81                                                                             |
| GO | protein binding | 321 | 6249 | 0.014 | 389421 lin-28 homolog B (C. elegans)                                                        |
| GO | protein binding | 321 | 6249 | 0.014 | 3932 lymphocyte-specific protein tyrosine kinase                                            |
| GO | protein binding | 321 | 6249 | 0.014 | 3936 lymphocyte cytosolic protein 1 (L-plastin)                                             |
| GO | protein binding | 321 | 6249 | 0.014 | 3952 leptin                                                                                 |
| GO | protein binding | 321 | 6249 | 0.014 | 3975 LIM homeobox 1                                                                         |
| GO | protein binding | 321 | 6249 | 0.014 | 401265 kelch-like 31 (Drosophila)                                                           |
| GO | protein binding | 321 | 6249 | 0.014 | 406 aryl hydrocarbon receptor nuclear translocator-like                                     |
| GO | protein binding | 321 | 6249 | 0.014 | 409 arrestin, beta 2                                                                        |
| GO | protein binding | 321 | 6249 | 0.014 | 4158 melanocortin 2 receptor (adrenocorticotrophic hormone)                                 |
| GO | protein binding | 321 | 6249 | 0.014 | 4171 minichromosome maintenance complex component 2                                         |
| GO | protein binding | 321 | 6249 | 0.014 | 4287 ataxin 3                                                                               |
| GO | protein binding | 321 | 6249 | 0.014 | 4291 myeloid leukemia factor 1                                                              |
| GO | protein binding | 321 | 6249 | 0.014 | 4292 mutL homolog 1, colon cancer, nonpolyposis type 2 (E. coli)                            |
| GO | protein binding | 321 | 6249 | 0.014 | 4318 matrix metalloproteinase 9 (gelatinase B, 92kDa gelatinase, 92kDa type IV collagenase) |
| GO | protein binding | 321 | 6249 | 0.014 | 4430 myosin IB                                                                              |
| GO | protein binding | 321 | 6249 | 0.014 | 4436 mutS homolog 2, colon cancer, nonpolyposis type 1 (E. coli)                            |
| GO | protein binding | 321 | 6249 | 0.014 | 4734 neural precursor cell expressed, developmentally down-regulated 4                      |
| GO | protein binding | 321 | 6249 | 0.014 | 4763 neurofibromin 1                                                                        |
| GO | protein binding | 321 | 6249 | 0.014 | 4830 non-metastatic cells 1, protein (NM23A) expressed in                                   |
| GO | protein binding | 321 | 6249 | 0.014 | 4867 nephronophthisis 1 (juvenile)                                                          |
| GO | protein binding | 321 | 6249 | 0.014 | 4893 neuroblastoma RAS viral (v-ras) oncogene homolog                                       |
| GO | protein binding | 321 | 6249 | 0.014 | 4928 nucleoporin 98kDa                                                                      |
| GO | protein binding | 321 | 6249 | 0.014 | 4968 8-oxoguanine DNA glycosylase                                                           |
| GO | protein binding | 321 | 6249 | 0.014 | 5000 origin recognition complex, subunit 4-like (yeast)                                     |
| GO | protein binding | 321 | 6249 | 0.014 | 5021 oxytocin receptor                                                                      |
| GO | protein binding | 321 | 6249 | 0.014 | 5054 serpin peptidase inhibitor, clade E (nexin, plasminogen activator inhibitor type 1)    |
| GO | protein binding | 321 | 6249 | 0.014 | 5081 paired box 7                                                                           |
| GO | protein binding | 321 | 6249 | 0.014 | 51003 mediator complex subunit 31                                                           |
| GO | protein binding | 321 | 6249 | 0.014 | 5101 protocadherin 9                                                                        |
| GO | protein binding | 321 | 6249 | 0.014 | 51062 atlastin GTPase 1                                                                     |
| GO | protein binding | 321 | 6249 | 0.014 | 5110 protein-L-isoaspartate (D-aspartate) O-methyltransferase                               |
| GO | protein binding | 321 | 6249 | 0.014 | 51136 ring finger protein, transmembrane 1                                                  |
| GO | protein binding | 321 | 6249 | 0.014 | 51382 ATPase, H <sup>+</sup> transporting, lysosomal 34kDa, V1 subunit D                    |

|    |                 |     |      |       |                                                                            |
|----|-----------------|-----|------|-------|----------------------------------------------------------------------------|
| GO | protein binding | 321 | 6249 | 0.014 | 5140 phosphodiesterase 3B, cGMP-inhibited                                  |
| GO | protein binding | 321 | 6249 | 0.014 | 51499 TP53 regulated inhibitor of apoptosis 1                              |
| GO | protein binding | 321 | 6249 | 0.014 | 5245 prohibitin                                                            |
| GO | protein binding | 321 | 6249 | 0.014 | 5264 phytanoyl-CoA 2-hydroxylase                                           |
| GO | protein binding | 321 | 6249 | 0.014 | 528 ATPase, H <sup>+</sup> transporting, lysosomal 42kDa, V1 subunit C1    |
| GO | protein binding | 321 | 6249 | 0.014 | 5341 pleckstrin                                                            |
| GO | protein binding | 321 | 6249 | 0.014 | 53981 cleavage and polyadenylation specific factor 2, 100kDa               |
| GO | protein binding | 321 | 6249 | 0.014 | 5420 podocalyxin-like                                                      |
| GO | protein binding | 321 | 6249 | 0.014 | 5469 mediator complex subunit 1                                            |
| GO | protein binding | 321 | 6249 | 0.014 | 54726 OTU domain containing 4                                              |
| GO | protein binding | 321 | 6249 | 0.014 | 54839 leucine rich repeat containing 49                                    |
| GO | protein binding | 321 | 6249 | 0.014 | 54843 synaptotagmin-like 2                                                 |
| GO | protein binding | 321 | 6249 | 0.014 | 54849 differentially expressed in FDCP 8 homolog (mouse)                   |
| GO | protein binding | 321 | 6249 | 0.014 | 5494 protein phosphatase, Mg <sup>2+</sup> /Mn <sup>2+</sup> dependent, 1A |
| GO | protein binding | 321 | 6249 | 0.014 | 54951 COMM domain containing 8                                             |
| GO | protein binding | 321 | 6249 | 0.014 | 54984 PIN2-interacting protein 1                                           |
| GO | protein binding | 321 | 6249 | 0.014 | 55012 protein phosphatase 2 (formerly 2A), regulatory subunit B'', gamma   |
| GO | protein binding | 321 | 6249 | 0.014 | 55135 WD repeat containing, antisense to TP53                              |
| GO | protein binding | 321 | 6249 | 0.014 | 55215 Fanconi anemia, complementation group I                              |
| GO | protein binding | 321 | 6249 | 0.014 | 55521 tripartite motif-containing 36                                       |
| GO | protein binding | 321 | 6249 | 0.014 | 55577 N-acetylglucosamine kinase                                           |
| GO | protein binding | 321 | 6249 | 0.014 | 55752 septin 11                                                            |
| GO | protein binding | 321 | 6249 | 0.014 | 55759 WD repeat domain 12                                                  |
| GO | protein binding | 321 | 6249 | 0.014 | 558 AXL receptor tyrosine kinase                                           |
| GO | protein binding | 321 | 6249 | 0.014 | 55803 ArfGAP with dual PH domains 2                                        |
| GO | protein binding | 321 | 6249 | 0.014 | 5588 protein kinase C, theta                                               |
| GO | protein binding | 321 | 6249 | 0.014 | 55916 nuclear transport factor 2-like export factor 2                      |
| GO | protein binding | 321 | 6249 | 0.014 | 56062 kelch-like 4 (Drosophila)                                            |
| GO | protein binding | 321 | 6249 | 0.014 | 5624 protein C (inactivator of coagulation factors Va and VIIIa)           |
| GO | protein binding | 321 | 6249 | 0.014 | 56241 sushi domain containing 2                                            |
| GO | protein binding | 321 | 6249 | 0.014 | 56655 polymerase (DNA-directed), epsilon 4 (p12 subunit)                   |
| GO | protein binding | 321 | 6249 | 0.014 | 56852 RAD18 homolog ( <i>S. cerevisiae</i> )                               |
| GO | protein binding | 321 | 6249 | 0.014 | 5702 proteasome (prosome, macropain) 26S subunit, ATPase, 3                |
| GO | protein binding | 321 | 6249 | 0.014 | 57099 apoptosis, caspase activation inhibitor                              |
| GO | protein binding | 321 | 6249 | 0.014 | 57144 p21 protein (Cdc42/Rac)-activated kinase 7                           |
| GO | protein binding | 321 | 6249 | 0.014 | 5717 proteasome (prosome, macropain) 26S subunit, non-ATPase, 11           |

|    |                 |     |      |       |       |                                                                           |
|----|-----------------|-----|------|-------|-------|---------------------------------------------------------------------------|
| GO | protein binding | 321 | 6249 | 0.014 | 57333 | reticulocalbin 3, EF-hand calcium binding domain                          |
| GO | protein binding | 321 | 6249 | 0.014 | 57484 | ring finger protein 150                                                   |
| GO | protein binding | 321 | 6249 | 0.014 | 5754  | PTK7 protein tyrosine kinase 7                                            |
| GO | protein binding | 321 | 6249 | 0.014 | 57599 | WD repeat domain 48                                                       |
| GO | protein binding | 321 | 6249 | 0.014 | 57650 | KIAA1524                                                                  |
| GO | protein binding | 321 | 6249 | 0.014 | 5795  | protein tyrosine phosphatase, receptor type, J                            |
| GO | protein binding | 321 | 6249 | 0.014 | 581   | BCL2-associated X protein                                                 |
| GO | protein binding | 321 | 6249 | 0.014 | 59    | actin, alpha 2, smooth muscle, aorta                                      |
| GO | protein binding | 321 | 6249 | 0.014 | 5924  | Ras protein-specific guanine nucleotide-releasing factor 2                |
| GO | protein binding | 321 | 6249 | 0.014 | 5965  | RecQ protein-like (DNA helicase Q1-like)                                  |
| GO | protein binding | 321 | 6249 | 0.014 | 597   | BCL2-related protein A1                                                   |
| GO | protein binding | 321 | 6249 | 0.014 | 6000  | regulator of G-protein signaling 7                                        |
| GO | protein binding | 321 | 6249 | 0.014 | 6120  | ribulose-5-phosphate-3-epimerase                                          |
| GO | protein binding | 321 | 6249 | 0.014 | 6154  | ribosomal protein L26                                                     |
| GO | protein binding | 321 | 6249 | 0.014 | 6204  | ribosomal protein S10                                                     |
| GO | protein binding | 321 | 6249 | 0.014 | 6241  | ribonucleotide reductase M2                                               |
| GO | protein binding | 321 | 6249 | 0.014 | 6242  | rhotekin                                                                  |
| GO | protein binding | 321 | 6249 | 0.014 | 6251  | Ras suppressor protein 1                                                  |
| GO | protein binding | 321 | 6249 | 0.014 | 6299  | sal-like 1 (Drosophila)                                                   |
| GO | protein binding | 321 | 6249 | 0.014 | 6347  | chemokine (C-C motif) ligand 2                                            |
| GO | protein binding | 321 | 6249 | 0.014 | 641   | Bloom syndrome, RecQ helicase-like                                        |
| GO | protein binding | 321 | 6249 | 0.014 | 64151 | non-SMC condensin I complex, subunit G                                    |
| GO | protein binding | 321 | 6249 | 0.014 | 6442  | sarcoglycan, alpha (50kDa dystrophin-associated glycoprotein)             |
| GO | protein binding | 321 | 6249 | 0.014 | 6444  | sarcoglycan, delta (35kDa dystrophin-associated glycoprotein)             |
| GO | protein binding | 321 | 6249 | 0.014 | 65062 | amyotrophic lateral sclerosis 2 (juvenile) chromosome region, candidate 4 |
| GO | protein binding | 321 | 6249 | 0.014 | 6580  | solute carrier family 22 (organic cation transporter), member 1           |
| GO | protein binding | 321 | 6249 | 0.014 | 6586  | slit homolog 3 (Drosophila)                                               |
| GO | protein binding | 321 | 6249 | 0.014 | 659   | bone morphogenetic protein receptor, type II (serine/threonine kinase)    |
| GO | protein binding | 321 | 6249 | 0.014 | 6615  | snail homolog 1 (Drosophila)                                              |
| GO | protein binding | 321 | 6249 | 0.014 | 6637  | small nuclear ribonucleoprotein polypeptide G                             |
| GO | protein binding | 321 | 6249 | 0.014 | 6657  | SRY (sex determining region Y)-box 2                                      |
| GO | protein binding | 321 | 6249 | 0.014 | 6659  | SRY (sex determining region Y)-box 4                                      |
| GO | protein binding | 321 | 6249 | 0.014 | 6662  | SRY (sex determining region Y)-box 9                                      |
| GO | protein binding | 321 | 6249 | 0.014 | 667   | dystonin                                                                  |
| GO | protein binding | 321 | 6249 | 0.014 | 6672  | SP100 nuclear antigen                                                     |
| GO | protein binding | 321 | 6249 | 0.014 | 6683  | spastin                                                                   |

|    |                 |     |      |       |                                                                                  |
|----|-----------------|-----|------|-------|----------------------------------------------------------------------------------|
| GO | protein binding | 321 | 6249 | 0.014 | 6711 spectrin, beta, non-erythrocytic 1                                          |
| GO | protein binding | 321 | 6249 | 0.014 | 672 breast cancer 1, early onset                                                 |
| GO | protein binding | 321 | 6249 | 0.014 | 6741 Sjogren syndrome antigen B (autoantigen La)                                 |
| GO | protein binding | 321 | 6249 | 0.014 | 6820 sulfotransferase family, cytosolic, 2B, member 1                            |
| GO | protein binding | 321 | 6249 | 0.014 | 70 actin, alpha, cardiac muscle 1                                                |
| GO | protein binding | 321 | 6249 | 0.014 | 7010 TEK tyrosine kinase, endothelial                                            |
| GO | protein binding | 321 | 6249 | 0.014 | 7021 transcription factor AP-2 beta (activating enhancer binding protein 2 beta) |
| GO | protein binding | 321 | 6249 | 0.014 | 7046 transforming growth factor, beta receptor 1                                 |
| GO | protein binding | 321 | 6249 | 0.014 | 7058 thrombospondin 2                                                            |
| GO | protein binding | 321 | 6249 | 0.014 | 7078 TIMP metalloproteinase inhibitor 3                                          |
| GO | protein binding | 321 | 6249 | 0.014 | 7137 troponin I type 3 (cardiac)                                                 |
| GO | protein binding | 321 | 6249 | 0.014 | 7220 transient receptor potential cation channel, subfamily C, member 1          |
| GO | protein binding | 321 | 6249 | 0.014 | 7324 ubiquitin-conjugating enzyme E2E 1 (UBC4/5 homolog, yeast)                  |
| GO | protein binding | 321 | 6249 | 0.014 | 7341 SMT3 suppressor of mif two 3 homolog 1 ( <i>S. cerevisiae</i> )             |
| GO | protein binding | 321 | 6249 | 0.014 | 7347 ubiquitin carboxyl-terminal esterase L3 (ubiquitin thiolesterase)           |
| GO | protein binding | 321 | 6249 | 0.014 | 7353 ubiquitin fusion degradation 1 like (yeast)                                 |
| GO | protein binding | 321 | 6249 | 0.014 | 7456 WAS/WASL interacting protein family, member 1                               |
| GO | protein binding | 321 | 6249 | 0.014 | 7490 Wilms tumor 1                                                               |
| GO | protein binding | 321 | 6249 | 0.014 | 767 carbonic anhydrase VIII                                                      |
| GO | protein binding | 321 | 6249 | 0.014 | 773 calcium channel, voltage-dependent, P/Q type, alpha 1A subunit               |
| GO | protein binding | 321 | 6249 | 0.014 | 7857 secretogranin II (chromogranin C)                                           |
| GO | protein binding | 321 | 6249 | 0.014 | 79075 defective in sister chromatid cohesion 1 homolog ( <i>S. cerevisiae</i> )  |
| GO | protein binding | 321 | 6249 | 0.014 | 79172 centromere protein O                                                       |
| GO | protein binding | 321 | 6249 | 0.014 | 79682 MLF1 interacting protein                                                   |
| GO | protein binding | 321 | 6249 | 0.014 | 79780 coiled-coil domain containing 82                                           |
| GO | protein binding | 321 | 6249 | 0.014 | 79833 gem (nuclear organelle) associated protein 6                               |
| GO | protein binding | 321 | 6249 | 0.014 | 80304 chromosome 2 open reading frame 44                                         |
| GO | protein binding | 321 | 6249 | 0.014 | 80342 TRAF3 interacting protein 3                                                |
| GO | protein binding | 321 | 6249 | 0.014 | 8091 high mobility group AT-hook 2                                               |
| GO | protein binding | 321 | 6249 | 0.014 | 81706 protein phosphatase 1, regulatory (inhibitor) subunit 14C                  |
| GO | protein binding | 321 | 6249 | 0.014 | 81786 tripartite motif-containing 7                                              |
| GO | protein binding | 321 | 6249 | 0.014 | 8193 D4, zinc and double PHD fingers family 1                                    |
| GO | protein binding | 321 | 6249 | 0.014 | 8349 histone cluster 2, H2be                                                     |
| GO | protein binding | 321 | 6249 | 0.014 | 8409 ubiquitously-expressed transcript                                           |
| GO | protein binding | 321 | 6249 | 0.014 | 84125 leucine-rich repeats and IQ motif containing 1                             |
| GO | protein binding | 321 | 6249 | 0.014 | 84168 anthrax toxin receptor 1                                                   |

|    |                 |     |      |       |                                                                          |
|----|-----------------|-----|------|-------|--------------------------------------------------------------------------|
| GO | protein binding | 321 | 6249 | 0.014 | 84172 polymerase (RNA) I polypeptide B, 128kDa                           |
| GO | protein binding | 321 | 6249 | 0.014 | 84189 SLIT and NTRK-like family, member 6                                |
| GO | protein binding | 321 | 6249 | 0.014 | 84206 mex-3 homolog B (C. elegans)                                       |
| GO | protein binding | 321 | 6249 | 0.014 | 84230 leucine rich repeat containing 8 family, member C                  |
| GO | protein binding | 321 | 6249 | 0.014 | 84296 GINS complex subunit 4 (Sld5 homolog)                              |
| GO | protein binding | 321 | 6249 | 0.014 | 84365 MKI67 (FHA domain) interacting nucleolar phosphoprotein            |
| GO | protein binding | 321 | 6249 | 0.014 | 84541 kelch repeat and BTB (POZ) domain containing 8                     |
| GO | protein binding | 321 | 6249 | 0.014 | 84552 par-6 partitioning defective 6 homolog gamma (C. elegans)          |
| GO | protein binding | 321 | 6249 | 0.014 | 8458 transcription termination factor, RNA polymerase II                 |
| GO | protein binding | 321 | 6249 | 0.014 | 8482 semaphorin 7A, GPI membrane anchor (John Milton Hagen blood group)  |
| GO | protein binding | 321 | 6249 | 0.014 | 84878 zinc finger and BTB domain containing 45                           |
| GO | protein binding | 321 | 6249 | 0.014 | 8520 histone acetyltransferase 1                                         |
| GO | protein binding | 321 | 6249 | 0.014 | 8533 COP9 constitutive photomorphogenic homolog subunit 3 (Arabidopsis)  |
| GO | protein binding | 321 | 6249 | 0.014 | 8563 THO complex 5                                                       |
| GO | protein binding | 321 | 6249 | 0.014 | 8604 solute carrier family 25 (mitochondrial carrier, Aralar), member 12 |
| GO | protein binding | 321 | 6249 | 0.014 | 8626 tumor protein p63                                                   |
| GO | protein binding | 321 | 6249 | 0.014 | 8777 multiple PDZ domain protein                                         |
| GO | protein binding | 321 | 6249 | 0.014 | 8788 delta-like 1 homolog (Drosophila)                                   |
| GO | protein binding | 321 | 6249 | 0.014 | 8835 suppressor of cytokine signaling 2                                  |
| GO | protein binding | 321 | 6249 | 0.014 | 890 cyclin A2                                                            |
| GO | protein binding | 321 | 6249 | 0.014 | 8905 adaptor-related protein complex 1, sigma 2 subunit                  |
| GO | protein binding | 321 | 6249 | 0.014 | 8970 histone cluster 1, H2bj                                             |
| GO | protein binding | 321 | 6249 | 0.014 | 898 cyclin E1                                                            |
| GO | protein binding | 321 | 6249 | 0.014 | 8997 kalirin, RhoGEF kinase                                              |
| GO | protein binding | 321 | 6249 | 0.014 | 91442 chromosome 19 open reading frame 40                                |
| GO | protein binding | 321 | 6249 | 0.014 | 91801 alkB, alkylation repair homolog 8 (E. coli)                        |
| GO | protein binding | 321 | 6249 | 0.014 | 92312 mex-3 homolog A (C. elegans)                                       |
| GO | protein binding | 321 | 6249 | 0.014 | 9260 PDZ and LIM domain 7 (enigma)                                       |
| GO | protein binding | 321 | 6249 | 0.014 | 9262 serine/threonine kinase 17b                                         |
| GO | protein binding | 321 | 6249 | 0.014 | 92737 delta/notch-like EGF repeat containing                             |
| GO | protein binding | 321 | 6249 | 0.014 | 93649 myocardin                                                          |
| GO | protein binding | 321 | 6249 | 0.014 | 9455 homer homolog 2 (Drosophila)                                        |
| GO | protein binding | 321 | 6249 | 0.014 | 9497 solute carrier family 4, sodium bicarbonate cotransporter, member 7 |
| GO | protein binding | 321 | 6249 | 0.014 | 9568 gamma-aminobutyric acid (GABA) B receptor, 2                        |
| GO | protein binding | 321 | 6249 | 0.014 | 9688 nucleoporin 93kDa                                                   |
| GO | protein binding | 321 | 6249 | 0.014 | 9732 dedicator of cytokinesis 4                                          |

|    |                                   |     |      |       |        |                                                                           |
|----|-----------------------------------|-----|------|-------|--------|---------------------------------------------------------------------------|
| GO | protein binding                   | 321 | 6249 | 0.014 | 9744   | ArfGAP with coiled-coil, ankyrin repeat and PH domains 1                  |
| GO | protein binding                   | 321 | 6249 | 0.014 | 9833   | maternal embryonic leucine zipper kinase                                  |
| GO | cell cycle                        | 32  | 458  | 0.014 | 10051  | structural maintenance of chromosomes 4                                   |
| GO | cell cycle                        | 32  | 458  | 0.014 | 113130 | cell division cycle associated 5                                          |
| GO | cell cycle                        | 32  | 458  | 0.014 | 1164   | CDC28 protein kinase regulatory subunit 2                                 |
| GO | cell cycle                        | 32  | 458  | 0.014 | 157570 | establishment of cohesion 1 homolog 2 ( <i>S. cerevisiae</i> )            |
| GO | cell cycle                        | 32  | 458  | 0.014 | 1841   | deoxythymidylate kinase (thymidylate kinase)                              |
| GO | cell cycle                        | 32  | 458  | 0.014 | 220042 | chromosome 11 open reading frame 82                                       |
| GO | cell cycle                        | 32  | 458  | 0.014 | 220134 | spindle and kinetochore associated complex subunit 1                      |
| GO | cell cycle                        | 32  | 458  | 0.014 | 2305   | forkhead box M1                                                           |
| GO | cell cycle                        | 32  | 458  | 0.014 | 23157  | septin 6                                                                  |
| GO | cell cycle                        | 32  | 458  | 0.014 | 26586  | cytoskeleton associated protein 2                                         |
| GO | cell cycle                        | 32  | 458  | 0.014 | 28984  | chromosome 13 open reading frame 15                                       |
| GO | cell cycle                        | 32  | 458  | 0.014 | 29128  | ubiquitin-like with PHD and ring finger domains 1                         |
| GO | cell cycle                        | 32  | 458  | 0.014 | 332    | baculoviral IAP repeat-containing 5                                       |
| GO | cell cycle                        | 32  | 458  | 0.014 | 4171   | minichromosome maintenance complex component 2                            |
| GO | cell cycle                        | 32  | 458  | 0.014 | 4291   | myeloid leukemia factor 1                                                 |
| GO | cell cycle                        | 32  | 458  | 0.014 | 4292   | mutL homolog 1, colon cancer, nonpolyposis type 2 ( <i>E. coli</i> )      |
| GO | cell cycle                        | 32  | 458  | 0.014 | 55165  | centrosomal protein 55kDa                                                 |
| GO | cell cycle                        | 32  | 458  | 0.014 | 55207  | ADP-ribosylation factor-like 8B                                           |
| GO | cell cycle                        | 32  | 458  | 0.014 | 55215  | Fanconi anemia, complementation group I                                   |
| GO | cell cycle                        | 32  | 458  | 0.014 | 55752  | septin 11                                                                 |
| GO | cell cycle                        | 32  | 458  | 0.014 | 64151  | non-SMC condensin I complex, subunit G                                    |
| GO | cell cycle                        | 32  | 458  | 0.014 | 6683   | spastin                                                                   |
| GO | cell cycle                        | 32  | 458  | 0.014 | 672    | breast cancer 1, early onset                                              |
| GO | cell cycle                        | 32  | 458  | 0.014 | 7029   | transcription factor Dp-2 (E2F dimerization partner 2)                    |
| GO | cell cycle                        | 32  | 458  | 0.014 | 79075  | defective in sister chromatid cohesion 1 homolog ( <i>S. cerevisiae</i> ) |
| GO | cell cycle                        | 32  | 458  | 0.014 | 79187  | fibronectin type III and SPRY domain containing 1                         |
| GO | cell cycle                        | 32  | 458  | 0.014 | 8091   | high mobility group AT-hook 2                                             |
| GO | cell cycle                        | 32  | 458  | 0.014 | 84552  | par-6 partitioning defective 6 homolog gamma ( <i>C. elegans</i> )        |
| GO | cell cycle                        | 32  | 458  | 0.014 | 8872   | cell division cycle 123 homolog ( <i>S. cerevisiae</i> )                  |
| GO | cell cycle                        | 32  | 458  | 0.014 | 890    | cyclin A2                                                                 |
| GO | cell cycle                        | 32  | 458  | 0.014 | 898    | cyclin E1                                                                 |
| GO | cell cycle                        | 32  | 458  | 0.014 | 93323  | HAUS augmin-like complex, subunit 8                                       |
| GO | protein kinase inhibitor activity | 4   | 21   | 0.015 | 1026   | cyclin-dependent kinase inhibitor 1A (p21, Cip1)                          |
| GO | protein kinase inhibitor activity | 4   | 21   | 0.015 | 11142  | protein kinase (cAMP-dependent, catalytic) inhibitor gamma                |

|    |                                         |    |     |       |        |                                                                |
|----|-----------------------------------------|----|-----|-------|--------|----------------------------------------------------------------|
| GO | protein kinase inhibitor activity       | 4  | 21  | 0.015 | 5569   | protein kinase (cAMP-dependent, catalytic) inhibitor alpha     |
| GO | protein kinase inhibitor activity       | 4  | 21  | 0.015 | 9535   | glia maturation factor, gamma                                  |
| GO | mitotic chromosome condensation         | 3  | 12  | 0.016 | 10051  | structural maintenance of chromosomes 4                        |
| GO | mitotic chromosome condensation         | 3  | 12  | 0.016 | 113130 | cell division cycle associated 5                               |
| GO | mitotic chromosome condensation         | 3  | 12  | 0.016 | 64151  | non-SMC condensin I complex, subunit G                         |
| GO | blastocyst development                  | 3  | 12  | 0.016 | 1045   | caudal type homeobox 2                                         |
| GO | blastocyst development                  | 3  | 12  | 0.016 | 5702   | proteasome (prosome, macropain) 26S subunit, ATPase, 3         |
| GO | blastocyst development                  | 3  | 12  | 0.016 | 7046   | transforming growth factor, beta receptor 1                    |
| GO | NLS-bearing substrate import into nucle | 3  | 12  | 0.016 | 2533   | FYN binding protein (FYB-120/130)                              |
| GO | NLS-bearing substrate import into nucle | 3  | 12  | 0.016 | 3836   | karyopherin alpha 1 (importin alpha 5)                         |
| GO | NLS-bearing substrate import into nucle | 3  | 12  | 0.016 | 3838   | karyopherin alpha 2 (RAG cohort 1, importin alpha 1)           |
| GO | rRNA transcription                      | 3  | 12  | 0.016 | 25885  | polymerase (RNA) I polypeptide A, 194kDa                       |
| GO | rRNA transcription                      | 3  | 12  | 0.016 | 84172  | polymerase (RNA) I polypeptide B, 128kDa                       |
| GO | rRNA transcription                      | 3  | 12  | 0.016 | 84365  | MKI67 (FHA domain) interacting nucleolar phosphoprotein        |
| GO | adrenal gland development               | 3  | 12  | 0.016 | 4763   | neurofibromin 1                                                |
| GO | adrenal gland development               | 3  | 12  | 0.016 | 6299   | sal-like 1 (Drosophila)                                        |
| GO | adrenal gland development               | 3  | 12  | 0.016 | 7490   | Wilms tumor 1                                                  |
| GO | dendrite                                | 12 | 128 | 0.016 | 1136   | cholinergic receptor, nicotinic, alpha 3                       |
| GO | dendrite                                | 12 | 128 | 0.016 | 1138   | cholinergic receptor, nicotinic, alpha 5                       |
| GO | dendrite                                | 12 | 128 | 0.016 | 1984   | eukaryotic translation initiation factor 5A                    |
| GO | dendrite                                | 12 | 128 | 0.016 | 2045   | EPH receptor A7                                                |
| GO | dendrite                                | 12 | 128 | 0.016 | 23705  | cell adhesion molecule 1                                       |
| GO | dendrite                                | 12 | 128 | 0.016 | 348    | apolipoprotein E                                               |
| GO | dendrite                                | 12 | 128 | 0.016 | 3763   | potassium inwardly-rectifying channel, subfamily J, member 6   |
| GO | dendrite                                | 12 | 128 | 0.016 | 4763   | neurofibromin 1                                                |
| GO | dendrite                                | 12 | 128 | 0.016 | 773    | calcium channel, voltage-dependent, P/Q type, alpha 1A subunit |
| GO | dendrite                                | 12 | 128 | 0.016 | 8626   | tumor protein p63                                              |
| GO | dendrite                                | 12 | 128 | 0.016 | 8777   | multiple PDZ domain protein                                    |
| GO | dendrite                                | 12 | 128 | 0.016 | 92737  | delta/notch-like EGF repeat containing                         |
| GO | isomerase activity                      | 10 | 99  | 0.017 | 10465  | peptidylprolyl isomerase H (cyclophilin H)                     |
| GO | isomerase activity                      | 10 | 99  | 0.017 | 150962 | pseudouridylate synthase 10                                    |
| GO | isomerase activity                      | 10 | 99  | 0.017 | 2281   | FK506 binding protein 1B, 12.6 kDa                             |
| GO | isomerase activity                      | 10 | 99  | 0.017 | 22934  | ribose 5-phosphate isomerase A                                 |
| GO | isomerase activity                      | 10 | 99  | 0.017 | 283209 | phosphoglucomutase 2-like 1                                    |
| GO | isomerase activity                      | 10 | 99  | 0.017 | 29940  | dermatan sulfate epimerase                                     |
| GO | isomerase activity                      | 10 | 99  | 0.017 | 51645  | peptidylprolyl isomerase (cyclophilin)-like 1                  |

|    |                                            |    |     |       |        |                                                                             |
|----|--------------------------------------------|----|-----|-------|--------|-----------------------------------------------------------------------------|
| GO | isomerase activity                         | 10 | 99  | 0.017 | 5303   | protein (peptidylprolyl cis/trans isomerase) NIMA-interacting, 4 (parvulin) |
| GO | isomerase activity                         | 10 | 99  | 0.017 | 6120   | ribulose-5-phosphate-3-epimerase                                            |
| GO | isomerase activity                         | 10 | 99  | 0.017 | 669    | 2,3-bisphosphoglycerate mutase                                              |
| GO | actin cytoskeleton organization            | 11 | 114 | 0.017 | 10391  | coronin, actin binding protein, 2B                                          |
| GO | actin cytoskeleton organization            | 11 | 114 | 0.017 | 10395  | deleted in liver cancer 1                                                   |
| GO | actin cytoskeleton organization            | 11 | 114 | 0.017 | 1730   | diaphanous homolog 2 (Drosophila)                                           |
| GO | actin cytoskeleton organization            | 11 | 114 | 0.017 | 26499  | pleckstrin 2                                                                |
| GO | actin cytoskeleton organization            | 11 | 114 | 0.017 | 4763   | neurofibromin 1                                                             |
| GO | actin cytoskeleton organization            | 11 | 114 | 0.017 | 4867   | nephronophthisis 1 (juvenile)                                               |
| GO | actin cytoskeleton organization            | 11 | 114 | 0.017 | 4893   | neuroblastoma RAS viral (v-ras) oncogene homolog                            |
| GO | actin cytoskeleton organization            | 11 | 114 | 0.017 | 5216   | profilin 1                                                                  |
| GO | actin cytoskeleton organization            | 11 | 114 | 0.017 | 7456   | WAS/WASL interacting protein family, member 1                               |
| GO | actin cytoskeleton organization            | 11 | 114 | 0.017 | 81624  | diaphanous homolog 3 (Drosophila)                                           |
| GO | actin cytoskeleton organization            | 11 | 114 | 0.017 | 9260   | PDZ and LIM domain 7 (enigma)                                               |
| GO | positive regulation of neuron differentia  | 4  | 22  | 0.017 | 10096  | ARP3 actin-related protein 3 homolog (yeast)                                |
| GO | positive regulation of neuron differentia  | 4  | 22  | 0.017 | 2736   | GLI family zinc finger 2                                                    |
| GO | positive regulation of neuron differentia  | 4  | 22  | 0.017 | 4897   | neuronal cell adhesion molecule                                             |
| GO | positive regulation of neuron differentia  | 4  | 22  | 0.017 | 6657   | SRY (sex determining region Y)-box 2                                        |
| GO | condensin complex                          | 2  | 5   | 0.02  | 10051  | structural maintenance of chromosomes 4                                     |
| GO | condensin complex                          | 2  | 5   | 0.02  | 64151  | non-SMC condensin I complex, subunit G                                      |
| GO | hemidesmosome                              | 2  | 5   | 0.02  | 10096  | ARP3 actin-related protein 3 homolog (yeast)                                |
| GO | hemidesmosome                              | 2  | 5   | 0.02  | 667    | dystonin                                                                    |
| GO | cAMP-dependent protein kinase inhibiti     | 2  | 5   | 0.02  | 11142  | protein kinase (cAMP-dependent, catalytic) inhibitor gamma                  |
| GO | cAMP-dependent protein kinase inhibiti     | 2  | 5   | 0.02  | 5569   | protein kinase (cAMP-dependent, catalytic) inhibitor alpha                  |
| GO | negative regulation of oligodendrocyte     | 2  | 5   | 0.02  | 1746   | distal-less homeobox 2                                                      |
| GO | negative regulation of oligodendrocyte     | 2  | 5   | 0.02  | 4763   | neurofibromin 1                                                             |
| GO | positive regulation of triglyceride biosyr | 2  | 5   | 0.02  | 23305  | acyl-CoA synthetase long-chain family member 6                              |
| GO | positive regulation of triglyceride biosyr | 2  | 5   | 0.02  | 57678  | glycerol-3-phosphate acyltransferase, mitochondrial                         |
| GO | nuclear origin of replication recognition  | 2  | 5   | 0.02  | 23594  | origin recognition complex, subunit 6 like (yeast)                          |
| GO | nuclear origin of replication recognition  | 2  | 5   | 0.02  | 4171   | minichromosome maintenance complex component 2                              |
| GO | activated T cell proliferation             | 2  | 5   | 0.02  | 23705  | cell adhesion molecule 1                                                    |
| GO | activated T cell proliferation             | 2  | 5   | 0.02  | 2534   | FYN oncogene related to SRC, FGR, YES                                       |
| GO | spinal cord association neuron different   | 2  | 5   | 0.02  | 266727 | MAM domain containing glycosylphosphatidylinositol anchor 1                 |
| GO | spinal cord association neuron different   | 2  | 5   | 0.02  | 5081   | paired box 7                                                                |
| GO | profilin binding                           | 2  | 5   | 0.02  | 27445  | piccolo (presynaptic cytomatrix protein)                                    |
| GO | profilin binding                           | 2  | 5   | 0.02  | 7456   | WAS/WASL interacting protein family, member 1                               |



|    |                                          |    |     |       |       |                                                                               |
|----|------------------------------------------|----|-----|-------|-------|-------------------------------------------------------------------------------|
| GO | phosphatidylcholine-sterol O-acyltransf  | 2  | 5   | 0.02  | 341   | apolipoprotein C-I                                                            |
| GO | phosphatidylcholine-sterol O-acyltransf  | 2  | 5   | 0.02  | 348   | apolipoprotein E                                                              |
| GO | lysosomal transport                      | 2  | 5   | 0.02  | 411   | arylsulfatase B                                                               |
| GO | lysosomal transport                      | 2  | 5   | 0.02  | 4734  | neural precursor cell expressed, developmentally down-regulated 4             |
| GO | positive regulation of penile erection   | 2  | 5   | 0.02  | 5021  | oxytocin receptor                                                             |
| GO | positive regulation of penile erection   | 2  | 5   | 0.02  | 5028  | purinergic receptor P2Y, G-protein coupled, 1                                 |
| GO | pattern recognition receptor activity    | 2  | 5   | 0.02  | 81035 | collectin sub-family member 12                                                |
| GO | pattern recognition receptor activity    | 2  | 5   | 0.02  | 8685  | macrophage receptor with collagenous structure                                |
| GO | regulation of cell proliferation         | 8  | 73  | 0.02  | 182   | jagged 1 (Alagille syndrome)                                                  |
| GO | regulation of cell proliferation         | 8  | 73  | 0.02  | 2305  | forkhead box M1                                                               |
| GO | regulation of cell proliferation         | 8  | 73  | 0.02  | 5054  | serpin peptidase inhibitor, clade E (nexin, plasminogen activator inhibitor t |
| GO | regulation of cell proliferation         | 8  | 73  | 0.02  | 659   | bone morphogenetic protein receptor, type II (serine/threonine kinase)        |
| GO | regulation of cell proliferation         | 8  | 73  | 0.02  | 6662  | SRY (sex determining region Y)-box 9                                          |
| GO | regulation of cell proliferation         | 8  | 73  | 0.02  | 672   | breast cancer 1, early onset                                                  |
| GO | regulation of cell proliferation         | 8  | 73  | 0.02  | 7010  | TEK tyrosine kinase, endothelial                                              |
| GO | regulation of cell proliferation         | 8  | 73  | 0.02  | 83879 | cell division cycle associated 7                                              |
| GO | cortical actin cytoskeleton organization | 3  | 13  | 0.02  | 2037  | erythrocyte membrane protein band 4.1-like 2                                  |
| GO | cortical actin cytoskeleton organization | 3  | 13  | 0.02  | 23136 | erythrocyte membrane protein band 4.1-like 3                                  |
| GO | cortical actin cytoskeleton organization | 3  | 13  | 0.02  | 5341  | pleckstrin                                                                    |
| GO | positive regulation of smooth muscle cc  | 3  | 13  | 0.02  | 2149  | coagulation factor II (thrombin) receptor                                     |
| GO | positive regulation of smooth muscle cc  | 3  | 13  | 0.02  | 60675 | prokineticin 2                                                                |
| GO | positive regulation of smooth muscle cc  | 3  | 13  | 0.02  | 93649 | myocardin                                                                     |
| GO | negative regulation of Wnt receptor sigi | 3  | 13  | 0.02  | 6422  | secreted frizzled-related protein 1                                           |
| GO | negative regulation of Wnt receptor sigi | 3  | 13  | 0.02  | 6657  | SRY (sex determining region Y)-box 2                                          |
| GO | negative regulation of Wnt receptor sigi | 3  | 13  | 0.02  | 81029 | wingless-type MMTV integration site family, member 5B                         |
| GO | embryonic skeletal system developmen     | 4  | 23  | 0.02  | 1746  | distal-less homeobox 2                                                        |
| GO | embryonic skeletal system developmen     | 4  | 23  | 0.02  | 5081  | paired box 7                                                                  |
| GO | embryonic skeletal system developmen     | 4  | 23  | 0.02  | 5125  | proprotein convertase subtilisin/kexin type 5                                 |
| GO | embryonic skeletal system developmen     | 4  | 23  | 0.02  | 8788  | delta-like 1 homolog (Drosophila)                                             |
| GO | growth factor binding                    | 4  | 23  | 0.02  | 2321  | fms-related tyrosine kinase 1 (vascular endothelial growth factor/vascular r  |
| GO | growth factor binding                    | 4  | 23  | 0.02  | 4052  | latent transforming growth factor beta binding protein 1                      |
| GO | growth factor binding                    | 4  | 23  | 0.02  | 659   | bone morphogenetic protein receptor, type II (serine/threonine kinase)        |
| GO | growth factor binding                    | 4  | 23  | 0.02  | 7046  | transforming growth factor, beta receptor 1                                   |
| GO | structural molecule activity             | 16 | 196 | 0.021 | 11149 | blood vessel epicardial substance                                             |
| GO | structural molecule activity             | 16 | 196 | 0.021 | 182   | jagged 1 (Alagille syndrome)                                                  |
| GO | structural molecule activity             | 16 | 196 | 0.021 | 2037  | erythrocyte membrane protein band 4.1-like 2                                  |

|    |                              |    |     |       |        |                                                                        |
|----|------------------------------|----|-----|-------|--------|------------------------------------------------------------------------|
| GO | structural molecule activity | 16 | 196 | 0.021 | 23136  | erythrocyte membrane protein band 4.1-like 3                           |
| GO | structural molecule activity | 16 | 196 | 0.021 | 23562  | claudin 14                                                             |
| GO | structural molecule activity | 16 | 196 | 0.021 | 347733 | tubulin, beta 2B                                                       |
| GO | structural molecule activity | 16 | 196 | 0.021 | 3883   | keratin 33A                                                            |
| GO | structural molecule activity | 16 | 196 | 0.021 | 3887   | keratin 81                                                             |
| GO | structural molecule activity | 16 | 196 | 0.021 | 4867   | nephronophthisis 1 (juvenile)                                          |
| GO | structural molecule activity | 16 | 196 | 0.021 | 57642  | collagen, type XX, alpha 1                                             |
| GO | structural molecule activity | 16 | 196 | 0.021 | 7058   | thrombospondin 2                                                       |
| GO | structural molecule activity | 16 | 196 | 0.021 | 7348   | uroplakin 1B                                                           |
| GO | structural molecule activity | 16 | 196 | 0.021 | 7846   | tubulin, alpha 1a                                                      |
| GO | structural molecule activity | 16 | 196 | 0.021 | 79861  | tubulin, alpha-like 3                                                  |
| GO | structural molecule activity | 16 | 196 | 0.021 | 9053   | microtubule-associated protein 7                                       |
| GO | structural molecule activity | 16 | 196 | 0.021 | 9076   | claudin 1                                                              |
| GO | RNA binding                  | 37 | 562 | 0.021 | 10056  | phenylalanyl-tRNA synthetase, beta subunit                             |
| GO | RNA binding                  | 37 | 562 | 0.021 | 10189  | THO complex 4                                                          |
| GO | RNA binding                  | 37 | 562 | 0.021 | 10492  | synaptotagmin binding, cytoplasmic RNA interacting protein             |
| GO | RNA binding                  | 37 | 562 | 0.021 | 10528  | NOP56 ribonucleoprotein homolog (yeast)                                |
| GO | RNA binding                  | 37 | 562 | 0.021 | 11022  | tudor and KH domain containing                                         |
| GO | RNA binding                  | 37 | 562 | 0.021 | 11056  | DEAD (Asp-Glu-Ala-Asp) box polypeptide 52                              |
| GO | RNA binding                  | 37 | 562 | 0.021 | 11222  | mitochondrial ribosomal protein L3                                     |
| GO | RNA binding                  | 37 | 562 | 0.021 | 132430 | poly(A) binding protein, cytoplasmic 4-like                            |
| GO | RNA binding                  | 37 | 562 | 0.021 | 135295 | splicing factor, arginine/serine-rich 13B                              |
| GO | RNA binding                  | 37 | 562 | 0.021 | 1787   | tRNA aspartic acid methyltransferase 1                                 |
| GO | RNA binding                  | 37 | 562 | 0.021 | 1984   | eukaryotic translation initiation factor 5A                            |
| GO | RNA binding                  | 37 | 562 | 0.021 | 201299 | RAD52 motif 1                                                          |
| GO | RNA binding                  | 37 | 562 | 0.021 | 23658  | LSM5 homolog, U6 small nuclear RNA associated ( <i>S. cerevisiae</i> ) |
| GO | RNA binding                  | 37 | 562 | 0.021 | 26019  | UPF2 regulator of nonsense transcripts homolog (yeast)                 |
| GO | RNA binding                  | 37 | 562 | 0.021 | 27258  | LSM3 homolog, U6 small nuclear RNA associated ( <i>S. cerevisiae</i> ) |
| GO | RNA binding                  | 37 | 562 | 0.021 | 3183   | heterogeneous nuclear ribonucleoprotein C (C1/C2)                      |
| GO | RNA binding                  | 37 | 562 | 0.021 | 345630 | fibrillarin-like 1                                                     |
| GO | RNA binding                  | 37 | 562 | 0.021 | 389421 | lin-28 homolog B ( <i>C. elegans</i> )                                 |
| GO | RNA binding                  | 37 | 562 | 0.021 | 53981  | cleavage and polyadenylation specific factor 2, 100kDa                 |
| GO | RNA binding                  | 37 | 562 | 0.021 | 55135  | WD repeat containing, antisense to TP53                                |
| GO | RNA binding                  | 37 | 562 | 0.021 | 55323  | La ribonucleoprotein domain family, member 6                           |
| GO | RNA binding                  | 37 | 562 | 0.021 | 56339  | methyltransferase like 3                                               |
| GO | RNA binding                  | 37 | 562 | 0.021 | 56902  | partner of NOB1 homolog ( <i>S. cerevisiae</i> )                       |

|    |                                         |    |     |       |        |                                                                           |
|----|-----------------------------------------|----|-----|-------|--------|---------------------------------------------------------------------------|
| GO | RNA binding                             | 37 | 562 | 0.021 | 58155  | polypyrimidine tract binding protein 2                                    |
| GO | RNA binding                             | 37 | 562 | 0.021 | 6133   | ribosomal protein L9                                                      |
| GO | RNA binding                             | 37 | 562 | 0.021 | 6154   | ribosomal protein L26                                                     |
| GO | RNA binding                             | 37 | 562 | 0.021 | 64393  | zinc finger, matrin type 3                                                |
| GO | RNA binding                             | 37 | 562 | 0.021 | 65008  | mitochondrial ribosomal protein L1                                        |
| GO | RNA binding                             | 37 | 562 | 0.021 | 6637   | small nuclear ribonucleoprotein polypeptide G                             |
| GO | RNA binding                             | 37 | 562 | 0.021 | 672    | breast cancer 1, early onset                                              |
| GO | RNA binding                             | 37 | 562 | 0.021 | 7490   | Wilms tumor 1                                                             |
| GO | RNA binding                             | 37 | 562 | 0.021 | 81892  | chromosome 14 open reading frame 156                                      |
| GO | RNA binding                             | 37 | 562 | 0.021 | 84206  | mex-3 homolog B (C. elegans)                                              |
| GO | RNA binding                             | 37 | 562 | 0.021 | 84365  | MKI67 (FHA domain) interacting nucleolar phosphoprotein                   |
| GO | RNA binding                             | 37 | 562 | 0.021 | 8563   | THO complex 5                                                             |
| GO | RNA binding                             | 37 | 562 | 0.021 | 91801  | alkB, alkylation repair homolog 8 (E. coli)                               |
| GO | RNA binding                             | 37 | 562 | 0.021 | 92312  | mex-3 homolog A (C. elegans)                                              |
| GO | interspecies interaction between organi | 21 | 280 | 0.021 | 10189  | THO complex 4                                                             |
| GO | interspecies interaction between organi | 21 | 280 | 0.021 | 10492  | synaptotagmin binding, cytoplasmic RNA interacting protein                |
| GO | interspecies interaction between organi | 21 | 280 | 0.021 | 131450 | CD200 receptor 1                                                          |
| GO | interspecies interaction between organi | 21 | 280 | 0.021 | 23157  | septin 6                                                                  |
| GO | interspecies interaction between organi | 21 | 280 | 0.021 | 2534   | FYN oncogene related to SRC, FGR, YES                                     |
| GO | interspecies interaction between organi | 21 | 280 | 0.021 | 3685   | integrin, alpha V (vitronectin receptor, alpha polypeptide, antigen CD51) |
| GO | interspecies interaction between organi | 21 | 280 | 0.021 | 3694   | integrin, beta 6                                                          |
| GO | interspecies interaction between organi | 21 | 280 | 0.021 | 3836   | karyopherin alpha 1 (importin alpha 5)                                    |
| GO | interspecies interaction between organi | 21 | 280 | 0.021 | 3838   | karyopherin alpha 2 (RAG cohort 1, importin alpha 1)                      |
| GO | interspecies interaction between organi | 21 | 280 | 0.021 | 3932   | lymphocyte-specific protein tyrosine kinase                               |
| GO | interspecies interaction between organi | 21 | 280 | 0.021 | 4312   | matrix metalloproteinase 1 (interstitial collagenase)                     |
| GO | interspecies interaction between organi | 21 | 280 | 0.021 | 4734   | neural precursor cell expressed, developmentally down-regulated 4         |
| GO | interspecies interaction between organi | 21 | 280 | 0.021 | 4928   | nucleoporin 98kDa                                                         |
| GO | interspecies interaction between organi | 21 | 280 | 0.021 | 5702   | proteasome (prosome, macropain) 26S subunit, ATPase, 3                    |
| GO | interspecies interaction between organi | 21 | 280 | 0.021 | 57599  | WD repeat domain 48                                                       |
| GO | interspecies interaction between organi | 21 | 280 | 0.021 | 6672   | SP100 nuclear antigen                                                     |
| GO | interspecies interaction between organi | 21 | 280 | 0.021 | 7037   | transferrin receptor (p90, CD71)                                          |
| GO | interspecies interaction between organi | 21 | 280 | 0.021 | 729230 | chemokine (C-C motif) receptor 2                                          |
| GO | interspecies interaction between organi | 21 | 280 | 0.021 | 79682  | MLF1 interacting protein                                                  |
| GO | interspecies interaction between organi | 21 | 280 | 0.021 | 8777   | multiple PDZ domain protein                                               |
| GO | interspecies interaction between organi | 21 | 280 | 0.021 | 9076   | claudin 1                                                                 |
| GO | postsynaptic membrane                   | 13 | 149 | 0.022 | 1136   | cholinergic receptor, nicotinic, alpha 3                                  |

|    |                                        |    |     |       |        |                                                                              |
|----|----------------------------------------|----|-----|-------|--------|------------------------------------------------------------------------------|
| GO | postsynaptic membrane                  | 13 | 149 | 0.022 | 1138   | cholinergic receptor, nicotinic, alpha 5                                     |
| GO | postsynaptic membrane                  | 13 | 149 | 0.022 | 200959 | gamma-aminobutyric acid (GABA) receptor, rho 3                               |
| GO | postsynaptic membrane                  | 13 | 149 | 0.022 | 2045   | EPH receptor A7                                                              |
| GO | postsynaptic membrane                  | 13 | 149 | 0.022 | 2149   | coagulation factor II (thrombin) receptor                                    |
| GO | postsynaptic membrane                  | 13 | 149 | 0.022 | 2558   | gamma-aminobutyric acid (GABA) A receptor, alpha 5                           |
| GO | postsynaptic membrane                  | 13 | 149 | 0.022 | 2898   | glutamate receptor, ionotropic, kainate 2                                    |
| GO | postsynaptic membrane                  | 13 | 149 | 0.022 | 2906   | glutamate receptor, ionotropic, N-methyl D-aspartate 2D                      |
| GO | postsynaptic membrane                  | 13 | 149 | 0.022 | 3778   | potassium large conductance calcium-activated channel, subfamily M, alpha 1  |
| GO | postsynaptic membrane                  | 13 | 149 | 0.022 | 8777   | multiple PDZ domain protein                                                  |
| GO | postsynaptic membrane                  | 13 | 149 | 0.022 | 9419   | cysteine-rich PDZ-binding protein                                            |
| GO | postsynaptic membrane                  | 13 | 149 | 0.022 | 9455   | homer homolog 2 (Drosophila)                                                 |
| GO | postsynaptic membrane                  | 13 | 149 | 0.022 | 9568   | gamma-aminobutyric acid (GABA) B receptor, 2                                 |
| GO | transmembrane receptor protein tyrosin | 5  | 35  | 0.022 | 2045   | EPH receptor A7                                                              |
| GO | transmembrane receptor protein tyrosin | 5  | 35  | 0.022 | 2321   | fms-related tyrosine kinase 1 (vascular endothelial growth factor/vascular p |
| GO | transmembrane receptor protein tyrosin | 5  | 35  | 0.022 | 558    | AXL receptor tyrosine kinase                                                 |
| GO | transmembrane receptor protein tyrosin | 5  | 35  | 0.022 | 5754   | PTK7 protein tyrosine kinase 7                                               |
| GO | transmembrane receptor protein tyrosin | 5  | 35  | 0.022 | 7010   | TEK tyrosine kinase, endothelial                                             |
| GO | kidney development                     | 7  | 61  | 0.022 | 220    | aldehyde dehydrogenase 1 family, member A3                                   |
| GO | kidney development                     | 7  | 61  | 0.022 | 2736   | GLI family zinc finger 2                                                     |
| GO | kidney development                     | 7  | 61  | 0.022 | 3975   | LIM homeobox 1                                                               |
| GO | kidney development                     | 7  | 61  | 0.022 | 5125   | proprotein convertase subtilisin/kexin type 5                                |
| GO | kidney development                     | 7  | 61  | 0.022 | 6299   | sal-like 1 (Drosophila)                                                      |
| GO | kidney development                     | 7  | 61  | 0.022 | 7046   | transforming growth factor, beta receptor 1                                  |
| GO | kidney development                     | 7  | 61  | 0.022 | 7490   | Wilms tumor 1                                                                |
| GO | homophilic cell adhesion               | 12 | 135 | 0.023 | 1000   | cadherin 2, type 1, N-cadherin (neuronal)                                    |
| GO | homophilic cell adhesion               | 12 | 135 | 0.023 | 1002   | cadherin 4, type 1, R-cadherin (retinal)                                     |
| GO | homophilic cell adhesion               | 12 | 135 | 0.023 | 1008   | cadherin 10, type 2 (T2-cadherin)                                            |
| GO | homophilic cell adhesion               | 12 | 135 | 0.023 | 120114 | FAT tumor suppressor homolog 3 (Drosophila)                                  |
| GO | homophilic cell adhesion               | 12 | 135 | 0.023 | 1830   | desmoglein 3 (pemphigus vulgaris antigen)                                    |
| GO | homophilic cell adhesion               | 12 | 135 | 0.023 | 23705  | cell adhesion molecule 1                                                     |
| GO | homophilic cell adhesion               | 12 | 135 | 0.023 | 347902 | adhesion molecule with Ig-like domain 2                                      |
| GO | homophilic cell adhesion               | 12 | 135 | 0.023 | 5101   | protocadherin 9                                                              |
| GO | homophilic cell adhesion               | 12 | 135 | 0.023 | 56104  | protocadherin gamma subfamily B, 1                                           |
| GO | homophilic cell adhesion               | 12 | 135 | 0.023 | 56126  | protocadherin beta 10                                                        |
| GO | homophilic cell adhesion               | 12 | 135 | 0.023 | 56133  | protocadherin beta 2                                                         |
| GO | homophilic cell adhesion               | 12 | 135 | 0.023 | 57575  | protocadherin 10                                                             |

|    |                                        |    |     |       |        |                                                                          |
|----|----------------------------------------|----|-----|-------|--------|--------------------------------------------------------------------------|
| GO | G-protein-coupled receptor binding     | 4  | 24  | 0.023 | 10672  | guanine nucleotide binding protein (G protein), alpha 13                 |
| GO | G-protein-coupled receptor binding     | 4  | 24  | 0.023 | 409    | arrestin, beta 2                                                         |
| GO | G-protein-coupled receptor binding     | 4  | 24  | 0.023 | 60675  | prokineticin 2                                                           |
| GO | G-protein-coupled receptor binding     | 4  | 24  | 0.023 | 6347   | chemokine (C-C motif) ligand 2                                           |
| GO | single-stranded RNA binding            | 3  | 14  | 0.025 | 10656  | KH domain containing, RNA binding, signal transduction associated 3      |
| GO | single-stranded RNA binding            | 3  | 14  | 0.025 | 124540 | musashi homolog 2 (Drosophila)                                           |
| GO | single-stranded RNA binding            | 3  | 14  | 0.025 | 1746   | distal-less homeobox 2                                                   |
| GO | response to X-ray                      | 3  | 14  | 0.025 | 1161   | excision repair cross-complementing rodent repair deficiency, complement |
| GO | response to X-ray                      | 3  | 14  | 0.025 | 4436   | mutS homolog 2, colon cancer, nonpolyposis type 1 (E. coli)              |
| GO | response to X-ray                      | 3  | 14  | 0.025 | 641    | Bloom syndrome, RecQ helicase-like                                       |
| GO | tubulin binding                        | 3  | 14  | 0.025 | 2534   | FYN oncogene related to SRC, FGR, YES                                    |
| GO | tubulin binding                        | 3  | 14  | 0.025 | 332    | baculoviral IAP repeat-containing 5                                      |
| GO | tubulin binding                        | 3  | 14  | 0.025 | 672    | breast cancer 1, early onset                                             |
| GO | artery morphogenesis                   | 3  | 14  | 0.025 | 348    | apolipoprotein E                                                         |
| GO | artery morphogenesis                   | 3  | 14  | 0.025 | 4763   | neurofibromin 1                                                          |
| GO | artery morphogenesis                   | 3  | 14  | 0.025 | 7046   | transforming growth factor, beta receptor 1                              |
| GO | anatomical structure formation involve | 3  | 14  | 0.025 | 3975   | LIM homeobox 1                                                           |
| GO | anatomical structure formation involve | 3  | 14  | 0.025 | 6657   | SRY (sex determining region Y)-box 2                                     |
| GO | anatomical structure formation involve | 3  | 14  | 0.025 | 8626   | tumor protein p63                                                        |
| GO | identical protein binding              | 24 | 338 | 0.026 | 113130 | cell division cycle associated 5                                         |
| GO | identical protein binding              | 24 | 338 | 0.026 | 150684 | copper metabolism (Murr1) domain containing 1                            |
| GO | identical protein binding              | 24 | 338 | 0.026 | 23562  | claudin 14                                                               |
| GO | identical protein binding              | 24 | 338 | 0.026 | 2534   | FYN oncogene related to SRC, FGR, YES                                    |
| GO | identical protein binding              | 24 | 338 | 0.026 | 26019  | UPF2 regulator of nonsense transcripts homolog (yeast)                   |
| GO | identical protein binding              | 24 | 338 | 0.026 | 26061  | 2-hydroxyacyl-CoA lyase 1                                                |
| GO | identical protein binding              | 24 | 338 | 0.026 | 283518 | potassium channel regulator                                              |
| GO | identical protein binding              | 24 | 338 | 0.026 | 3028   | hydroxysteroid (17-beta) dehydrogenase 10                                |
| GO | identical protein binding              | 24 | 338 | 0.026 | 3183   | heterogeneous nuclear ribonucleoprotein C (C1/C2)                        |
| GO | identical protein binding              | 24 | 338 | 0.026 | 332    | baculoviral IAP repeat-containing 5                                      |
| GO | identical protein binding              | 24 | 338 | 0.026 | 348    | apolipoprotein E                                                         |
| GO | identical protein binding              | 24 | 338 | 0.026 | 355    | Fas (TNF receptor superfamily, member 6)                                 |
| GO | identical protein binding              | 24 | 338 | 0.026 | 3624   | inhibin, beta A                                                          |
| GO | identical protein binding              | 24 | 338 | 0.026 | 3936   | lymphocyte cytosolic protein 1 (L-plastin)                               |
| GO | identical protein binding              | 24 | 338 | 0.026 | 4436   | mutS homolog 2, colon cancer, nonpolyposis type 1 (E. coli)              |
| GO | identical protein binding              | 24 | 338 | 0.026 | 4830   | non-metastatic cells 1, protein (NM23A) expressed in                     |
| GO | identical protein binding              | 24 | 338 | 0.026 | 51062  | atlastin GTPase 1                                                        |

|    |                                        |    |     |       |       |                                                                          |
|----|----------------------------------------|----|-----|-------|-------|--------------------------------------------------------------------------|
| GO | identical protein binding              | 24 | 338 | 0.026 | 5110  | protein-L-isoaspartate (D-aspartate) O-methyltransferase                 |
| GO | identical protein binding              | 24 | 338 | 0.026 | 581   | BCL2-associated X protein                                                |
| GO | identical protein binding              | 24 | 338 | 0.026 | 586   | branched chain aminotransferase 1, cytosolic                             |
| GO | identical protein binding              | 24 | 338 | 0.026 | 6672  | SP100 nuclear antigen                                                    |
| GO | identical protein binding              | 24 | 338 | 0.026 | 672   | breast cancer 1, early onset                                             |
| GO | identical protein binding              | 24 | 338 | 0.026 | 8626  | tumor protein p63                                                        |
| GO | identical protein binding              | 24 | 338 | 0.026 | 9076  | claudin 1                                                                |
| GO | stress fiber                           | 4  | 25  | 0.027 | 10395 | deleted in liver cancer 1                                                |
| GO | stress fiber                           | 4  | 25  | 0.027 | 55752 | septin 11                                                                |
| GO | stress fiber                           | 4  | 25  | 0.027 | 7168  | tropomyosin 1 (alpha)                                                    |
| GO | stress fiber                           | 4  | 25  | 0.027 | 9260  | PDZ and LIM domain 7 (enigma)                                            |
| GO | osteoblast differentiation             | 4  | 25  | 0.027 | 10457 | glycoprotein (transmembrane) nmb                                         |
| GO | osteoblast differentiation             | 4  | 25  | 0.027 | 2736  | GLI family zinc finger 2                                                 |
| GO | osteoblast differentiation             | 4  | 25  | 0.027 | 4763  | neurofibromin 1                                                          |
| GO | osteoblast differentiation             | 4  | 25  | 0.027 | 6657  | SRY (sex determining region Y)-box 2                                     |
| GO | heterotrimeric G-protein complex       | 4  | 25  | 0.027 | 10672 | guanine nucleotide binding protein (G protein), alpha 13                 |
| GO | heterotrimeric G-protein complex       | 4  | 25  | 0.027 | 2786  | guanine nucleotide binding protein (G protein), gamma 4                  |
| GO | heterotrimeric G-protein complex       | 4  | 25  | 0.027 | 54331 | guanine nucleotide binding protein (G protein), gamma 2                  |
| GO | heterotrimeric G-protein complex       | 4  | 25  | 0.027 | 6000  | regulator of G-protein signaling 7                                       |
| GO | response to DNA damage stimulus        | 8  | 78  | 0.028 | 1026  | cyclin-dependent kinase inhibitor 1A (p21, Cip1)                         |
| GO | response to DNA damage stimulus        | 8  | 78  | 0.028 | 1161  | excision repair cross-complementing rodent repair deficiency, complement |
| GO | response to DNA damage stimulus        | 8  | 78  | 0.028 | 27244 | sestrin 1                                                                |
| GO | response to DNA damage stimulus        | 8  | 78  | 0.028 | 641   | Bloom syndrome, RecQ helicase-like                                       |
| GO | response to DNA damage stimulus        | 8  | 78  | 0.028 | 64393 | zinc finger, matrin type 3                                               |
| GO | response to DNA damage stimulus        | 8  | 78  | 0.028 | 64782 | apoptosis enhancing nuclease                                             |
| GO | response to DNA damage stimulus        | 8  | 78  | 0.028 | 672   | breast cancer 1, early onset                                             |
| GO | response to DNA damage stimulus        | 8  | 78  | 0.028 | 91801 | alkB, alkylation repair homolog 8 (E. coli)                              |
| GO | intronless viral mRNA export from host | 2  | 6   | 0.029 | 10189 | THO complex 4                                                            |
| GO | intronless viral mRNA export from host | 2  | 6   | 0.029 | 8563  | THO complex 5                                                            |
| GO | transcription export complex           | 2  | 6   | 0.029 | 10189 | THO complex 4                                                            |
| GO | transcription export complex           | 2  | 6   | 0.029 | 8563  | THO complex 5                                                            |
| GO | behavioral response to nicotine        | 2  | 6   | 0.029 | 1136  | cholinergic receptor, nicotinic, alpha 3                                 |
| GO | behavioral response to nicotine        | 2  | 6   | 0.029 | 1138  | cholinergic receptor, nicotinic, alpha 5                                 |
| GO | thyroid hormone generation             | 2  | 6   | 0.029 | 1733  | deiodinase, iodothyronine, type I                                        |
| GO | thyroid hormone generation             | 2  | 6   | 0.029 | 5469  | mediator complex subunit 1                                               |
| GO | forebrain neuron differentiation       | 2  | 6   | 0.029 | 1746  | distal-less homeobox 2                                                   |

|    |                                            |    |     |       |                                                                       |
|----|--------------------------------------------|----|-----|-------|-----------------------------------------------------------------------|
| GO | forebrain neuron differentiation           | 2  | 6   | 0.029 | 6657 SRY (sex determining region Y)-box 2                             |
| GO | deoxyribonuclease activity                 | 2  | 6   | 0.029 | 1775 deoxyribonuclease I-like 2                                       |
| GO | deoxyribonuclease activity                 | 2  | 6   | 0.029 | 4830 non-metastatic cells 1, protein (NM23A) expressed in             |
| GO | regulation of blood coagulation            | 2  | 6   | 0.029 | 2149 coagulation factor II (thrombin) receptor                        |
| GO | regulation of blood coagulation            | 2  | 6   | 0.029 | 2150 coagulation factor II (thrombin) receptor-like 1                 |
| GO | mitochondrial intermembrane space pr       | 2  | 6   | 0.029 | 26519 translocase of inner mitochondrial membrane 10 homolog (yeast)  |
| GO | mitochondrial intermembrane space pr       | 2  | 6   | 0.029 | 26521 translocase of inner mitochondrial membrane 8 homolog B (yeast) |
| GO | protein import into mitochondrial inner    | 2  | 6   | 0.029 | 26519 translocase of inner mitochondrial membrane 10 homolog (yeast)  |
| GO | protein import into mitochondrial inner    | 2  | 6   | 0.029 | 26521 translocase of inner mitochondrial membrane 8 homolog B (yeast) |
| GO | response to dietary excess                 | 2  | 6   | 0.029 | 348 apolipoprotein E                                                  |
| GO | response to dietary excess                 | 2  | 6   | 0.029 | 3952 leptin                                                           |
| GO | cerebellar Purkinje cell differentiation   | 2  | 6   | 0.029 | 3975 LIM homeobox 1                                                   |
| GO | cerebellar Purkinje cell differentiation   | 2  | 6   | 0.029 | 773 calcium channel, voltage-dependent, P/Q type, alpha 1A subunit    |
| GO | DNA replication origin binding             | 2  | 6   | 0.029 | 4171 minichromosome maintenance complex component 2                   |
| GO | DNA replication origin binding             | 2  | 6   | 0.029 | 5000 origin recognition complex, subunit 4-like (yeast)               |
| GO | somatic hypermutation of immunoglob        | 2  | 6   | 0.029 | 4292 mutL homolog 1, colon cancer, nonpolyposis type 2 (E. coli)      |
| GO | somatic hypermutation of immunoglob        | 2  | 6   | 0.029 | 4436 mutS homolog 2, colon cancer, nonpolyposis type 1 (E. coli)      |
| GO | response to folic acid                     | 2  | 6   | 0.029 | 590 butyrylcholinesterase                                             |
| GO | response to folic acid                     | 2  | 6   | 0.029 | 7078 TIMP metalloproteinase inhibitor 3                               |
| GO | sarcoglycan complex                        | 2  | 6   | 0.029 | 6442 sarcoglycan, alpha (50kDa dystrophin-associated glycoprotein)    |
| GO | sarcoglycan complex                        | 2  | 6   | 0.029 | 6444 sarcoglycan, delta (35kDa dystrophin-associated glycoprotein)    |
| GO | parathyroid gland development              | 2  | 6   | 0.029 | 6899 T-box 1                                                          |
| GO | parathyroid gland development              | 2  | 6   | 0.029 | 7046 transforming growth factor, beta receptor 1                      |
| GO | heart contraction                          | 2  | 6   | 0.029 | 70 actin, alpha, cardiac muscle 1                                     |
| GO | heart contraction                          | 2  | 6   | 0.029 | 7137 troponin I type 3 (cardiac)                                      |
| GO | cell cycle arrest                          | 10 | 108 | 0.029 | 1026 cyclin-dependent kinase inhibitor 1A (p21, Cip1)                 |
| GO | cell cycle arrest                          | 10 | 108 | 0.029 | 220042 chromosome 11 open reading frame 82                            |
| GO | cell cycle arrest                          | 10 | 108 | 0.029 | 27244 sestrin 1                                                       |
| GO | cell cycle arrest                          | 10 | 108 | 0.029 | 3624 inhibin, beta A                                                  |
| GO | cell cycle arrest                          | 10 | 108 | 0.029 | 4291 myeloid leukemia factor 1                                        |
| GO | cell cycle arrest                          | 10 | 108 | 0.029 | 4436 mutS homolog 2, colon cancer, nonpolyposis type 1 (E. coli)      |
| GO | cell cycle arrest                          | 10 | 108 | 0.029 | 6657 SRY (sex determining region Y)-box 2                             |
| GO | cell cycle arrest                          | 10 | 108 | 0.029 | 667 dystonin                                                          |
| GO | cell cycle arrest                          | 10 | 108 | 0.029 | 8872 cell division cycle 123 homolog (S. cerevisiae)                  |
| GO | cell cycle arrest                          | 10 | 108 | 0.029 | 94241 tumor protein p53 inducible nuclear protein 1                   |
| GO | induction of apoptosis by intracellular si | 3  | 15  | 0.03  | 1026 cyclin-dependent kinase inhibitor 1A (p21, Cip1)                 |

|    |                                            |    |     |       |                                                                                  |
|----|--------------------------------------------|----|-----|-------|----------------------------------------------------------------------------------|
| GO | induction of apoptosis by intracellular si | 3  | 15  | 0.03  | 27429 HtrA serine peptidase 2                                                    |
| GO | induction of apoptosis by intracellular si | 3  | 15  | 0.03  | 581 BCL2-associated X protein                                                    |
| GO | digestive tract development                | 3  | 15  | 0.03  | 1543 cytochrome P450, family 1, subfamily A, polypeptide 1                       |
| GO | digestive tract development                | 3  | 15  | 0.03  | 5021 oxytocin receptor                                                           |
| GO | digestive tract development                | 3  | 15  | 0.03  | 7046 transforming growth factor, beta receptor 1                                 |
| GO | N-acetylglucosamine metabolic process      | 3  | 15  | 0.03  | 2135 exostoses (multiple)-like 2                                                 |
| GO | N-acetylglucosamine metabolic process      | 3  | 15  | 0.03  | 55577 N-acetylglucosamine kinase                                                 |
| GO | N-acetylglucosamine metabolic process      | 3  | 15  | 0.03  | 9215 like-glycosyltransferase                                                    |
| GO | forebrain development                      | 6  | 51  | 0.03  | 10395 deleted in liver cancer 1                                                  |
| GO | forebrain development                      | 6  | 51  | 0.03  | 2534 FYN oncogene related to SRC, FGR, YES                                       |
| GO | forebrain development                      | 6  | 51  | 0.03  | 27429 HtrA serine peptidase 2                                                    |
| GO | forebrain development                      | 6  | 51  | 0.03  | 5015 orthodenticle homeobox 2                                                    |
| GO | forebrain development                      | 6  | 51  | 0.03  | 5101 protocadherin 9                                                             |
| GO | forebrain development                      | 6  | 51  | 0.03  | 6657 SRY (sex determining region Y)-box 2                                        |
| GO | nucleotide-excision repair                 | 4  | 26  | 0.031 | 1161 excision repair cross-complementing rodent repair deficiency, complement    |
| GO | nucleotide-excision repair                 | 4  | 26  | 0.031 | 1643 damage-specific DNA binding protein 2, 48kDa                                |
| GO | nucleotide-excision repair                 | 4  | 26  | 0.031 | 4287 ataxin 3                                                                    |
| GO | nucleotide-excision repair                 | 4  | 26  | 0.031 | 4968 8-oxoguanine DNA glycosylase                                                |
| GO | triglyceride metabolic process             | 4  | 26  | 0.031 | 23305 acyl-CoA synthetase long-chain family member 6                             |
| GO | triglyceride metabolic process             | 4  | 26  | 0.031 | 341 apolipoprotein C-I                                                           |
| GO | triglyceride metabolic process             | 4  | 26  | 0.031 | 348 apolipoprotein E                                                             |
| GO | triglyceride metabolic process             | 4  | 26  | 0.031 | 7840 Alstrom syndrome 1                                                          |
| GO | branching involved in ureteric bud morph   | 4  | 26  | 0.031 | 3237 homeobox D11                                                                |
| GO | branching involved in ureteric bud morph   | 4  | 26  | 0.031 | 5228 placental growth factor                                                     |
| GO | branching involved in ureteric bud morph   | 4  | 26  | 0.031 | 6299 sal-like 1 (Drosophila)                                                     |
| GO | branching involved in ureteric bud morph   | 4  | 26  | 0.031 | 7490 Wilms tumor 1                                                               |
| GO | skeletal system development                | 11 | 125 | 0.031 | 10683 delta-like 3 (Drosophila)                                                  |
| GO | skeletal system development                | 11 | 125 | 0.031 | 1290 collagen, type V, alpha 2                                                   |
| GO | skeletal system development                | 11 | 125 | 0.031 | 2736 GLI family zinc finger 2                                                    |
| GO | skeletal system development                | 11 | 125 | 0.031 | 3236 homeobox D10                                                                |
| GO | skeletal system development                | 11 | 125 | 0.031 | 3237 homeobox D11                                                                |
| GO | skeletal system development                | 11 | 125 | 0.031 | 4318 matrix metalloproteinase 9 (gelatinase B, 92kDa gelatinase, 92kDa type IV c |
| GO | skeletal system development                | 11 | 125 | 0.031 | 5744 parathyroid hormone-like hormone                                            |
| GO | skeletal system development                | 11 | 125 | 0.031 | 6474 short stature homeobox 2                                                    |
| GO | skeletal system development                | 11 | 125 | 0.031 | 7046 transforming growth factor, beta receptor 1                                 |
| GO | skeletal system development                | 11 | 125 | 0.031 | 7353 ubiquitin fusion degradation 1 like (yeast)                                 |



|    |                             |    |     |       |        |                                                                             |
|----|-----------------------------|----|-----|-------|--------|-----------------------------------------------------------------------------|
| GO | skeletal system development | 11 | 125 | 0.031 | 8626   | tumor protein p63                                                           |
| GO | cytoskeleton                | 40 | 635 | 0.032 | 122786 | FERM domain containing 6                                                    |
| GO | cytoskeleton                | 40 | 635 | 0.032 | 1264   | calponin 1, basic, smooth muscle                                            |
| GO | cytoskeleton                | 40 | 635 | 0.032 | 2037   | erythrocyte membrane protein band 4.1-like 2                                |
| GO | cytoskeleton                | 40 | 635 | 0.032 | 220134 | spindle and kinetochore associated complex subunit 1                        |
| GO | cytoskeleton                | 40 | 635 | 0.032 | 23136  | erythrocyte membrane protein band 4.1-like 3                                |
| GO | cytoskeleton                | 40 | 635 | 0.032 | 23157  | septin 6                                                                    |
| GO | cytoskeleton                | 40 | 635 | 0.032 | 26059  | ELKS/RAB6-interacting/CAST family member 2                                  |
| GO | cytoskeleton                | 40 | 635 | 0.032 | 26499  | pleckstrin 2                                                                |
| GO | cytoskeleton                | 40 | 635 | 0.032 | 27241  | Bardet-Biedl syndrome 9                                                     |
| GO | cytoskeleton                | 40 | 635 | 0.032 | 27289  | Rho family GTPase 1                                                         |
| GO | cytoskeleton                | 40 | 635 | 0.032 | 27445  | piccolo (presynaptic cytomatrix protein)                                    |
| GO | cytoskeleton                | 40 | 635 | 0.032 | 287    | ankyrin 2, neuronal                                                         |
| GO | cytoskeleton                | 40 | 635 | 0.032 | 28984  | chromosome 13 open reading frame 15                                         |
| GO | cytoskeleton                | 40 | 635 | 0.032 | 29767  | tropomodulin 2 (neuronal)                                                   |
| GO | cytoskeleton                | 40 | 635 | 0.032 | 30011  | SH3-domain kinase binding protein 1                                         |
| GO | cytoskeleton                | 40 | 635 | 0.032 | 332    | baculoviral IAP repeat-containing 5                                         |
| GO | cytoskeleton                | 40 | 635 | 0.032 | 3936   | lymphocyte cytosolic protein 1 (L-plastin)                                  |
| GO | cytoskeleton                | 40 | 635 | 0.032 | 4651   | myosin X                                                                    |
| GO | cytoskeleton                | 40 | 635 | 0.032 | 5303   | protein (peptidylprolyl cis/trans isomerase) NIMA-interacting, 4 (parvulin) |
| GO | cytoskeleton                | 40 | 635 | 0.032 | 54839  | leucine rich repeat containing 49                                           |
| GO | cytoskeleton                | 40 | 635 | 0.032 | 55165  | centrosomal protein 55kDa                                                   |
| GO | cytoskeleton                | 40 | 635 | 0.032 | 55207  | ADP-ribosylation factor-like 8B                                             |
| GO | cytoskeleton                | 40 | 635 | 0.032 | 55521  | tripartite motif-containing 36                                              |
| GO | cytoskeleton                | 40 | 635 | 0.032 | 55531  | ELMO/CED-12 domain containing 1                                             |
| GO | cytoskeleton                | 40 | 635 | 0.032 | 55752  | septin 11                                                                   |
| GO | cytoskeleton                | 40 | 635 | 0.032 | 56062  | kelch-like 4 (Drosophila)                                                   |
| GO | cytoskeleton                | 40 | 635 | 0.032 | 57560  | intraflagellar transport 80 homolog (Chlamydomonas)                         |
| GO | cytoskeleton                | 40 | 635 | 0.032 | 6442   | sarcoglycan, alpha (50kDa dystrophin-associated glycoprotein)               |
| GO | cytoskeleton                | 40 | 635 | 0.032 | 6444   | sarcoglycan, delta (35kDa dystrophin-associated glycoprotein)               |
| GO | cytoskeleton                | 40 | 635 | 0.032 | 6525   | smoothelin                                                                  |
| GO | cytoskeleton                | 40 | 635 | 0.032 | 667    | dystonin                                                                    |
| GO | cytoskeleton                | 40 | 635 | 0.032 | 70     | actin, alpha, cardiac muscle 1                                              |
| GO | cytoskeleton                | 40 | 635 | 0.032 | 7168   | tropomyosin 1 (alpha)                                                       |
| GO | cytoskeleton                | 40 | 635 | 0.032 | 7171   | tropomyosin 4                                                               |
| GO | cytoskeleton                | 40 | 635 | 0.032 | 7840   | Alstrom syndrome 1                                                          |

|    |                                           |    |     |       |        |                                                                           |
|----|-------------------------------------------|----|-----|-------|--------|---------------------------------------------------------------------------|
| GO | cytoskeleton                              | 40 | 635 | 0.032 | 79187  | fibronectin type III and SPRY domain containing 1                         |
| GO | cytoskeleton                              | 40 | 635 | 0.032 | 79929  | MAP6 domain containing 1                                                  |
| GO | cytoskeleton                              | 40 | 635 | 0.032 | 8409   | ubiquitously-expressed transcript                                         |
| GO | cytoskeleton                              | 40 | 635 | 0.032 | 91624  | nexilin (F actin binding protein)                                         |
| GO | cytoskeleton                              | 40 | 635 | 0.032 | 93323  | HAUS augmin-like complex, subunit 8                                       |
| GO | ureteric bud development                  | 5  | 39  | 0.033 | 3975   | LIM homeobox 1                                                            |
| GO | ureteric bud development                  | 5  | 39  | 0.033 | 6299   | sal-like 1 (Drosophila)                                                   |
| GO | ureteric bud development                  | 5  | 39  | 0.033 | 6422   | secreted frizzled-related protein 1                                       |
| GO | ureteric bud development                  | 5  | 39  | 0.033 | 7490   | Wilms tumor 1                                                             |
| GO | ureteric bud development                  | 5  | 39  | 0.033 | 9244   | cytokine receptor-like factor 1                                           |
| GO | adherens junction                         | 4  | 27  | 0.035 | 126374 | Wilms tumor 1 interacting protein                                         |
| GO | adherens junction                         | 4  | 27  | 0.035 | 1496   | catenin (cadherin-associated protein), alpha 2                            |
| GO | adherens junction                         | 4  | 27  | 0.035 | 27289  | Rho family GTPase 1                                                       |
| GO | adherens junction                         | 4  | 27  | 0.035 | 4867   | nephronophthisis 1 (juvenile)                                             |
| GO | response to wounding                      | 6  | 53  | 0.035 | 1543   | cytochrome P450, family 1, subfamily A, polypeptide 1                     |
| GO | response to wounding                      | 6  | 53  | 0.035 | 2149   | coagulation factor II (thrombin) receptor                                 |
| GO | response to wounding                      | 6  | 53  | 0.035 | 2151   | coagulation factor II (thrombin) receptor-like 2                          |
| GO | response to wounding                      | 6  | 53  | 0.035 | 26127  | FGFR1 oncogene partner 2                                                  |
| GO | response to wounding                      | 6  | 53  | 0.035 | 6657   | SRY (sex determining region Y)-box 2                                      |
| GO | response to wounding                      | 6  | 53  | 0.035 | 729230 | chemokine (C-C motif) receptor 2                                          |
| GO | lateral plasma membrane                   | 3  | 16  | 0.036 | 11149  | blood vessel epicardial substance                                         |
| GO | lateral plasma membrane                   | 3  | 16  | 0.036 | 166336 | prickle homolog 2 (Drosophila)                                            |
| GO | lateral plasma membrane                   | 3  | 16  | 0.036 | 9076   | claudin 1                                                                 |
| GO | negative regulation of endothelial cell p | 3  | 16  | 0.036 | 348    | apolipoprotein E                                                          |
| GO | negative regulation of endothelial cell p | 3  | 16  | 0.036 | 4763   | neurofibromin 1                                                           |
| GO | negative regulation of endothelial cell p | 3  | 16  | 0.036 | 7857   | secretogranin II (chromogranin C)                                         |
| GO | mismatch repair                           | 3  | 16  | 0.036 | 4292   | mutL homolog 1, colon cancer, nonpolyposis type 2 (E. coli)               |
| GO | mismatch repair                           | 3  | 16  | 0.036 | 4436   | mutS homolog 2, colon cancer, nonpolyposis type 1 (E. coli)               |
| GO | mismatch repair                           | 3  | 16  | 0.036 | 5378   | PMS1 postmeiotic segregation increased 1 (S. cerevisiae)                  |
| GO | neuron fate commitment                    | 3  | 16  | 0.036 | 5081   | paired box 7                                                              |
| GO | neuron fate commitment                    | 3  | 16  | 0.036 | 6657   | SRY (sex determining region Y)-box 2                                      |
| GO | neuron fate commitment                    | 3  | 16  | 0.036 | 7046   | transforming growth factor, beta receptor 1                               |
| GO | blood vessel development                  | 5  | 40  | 0.037 | 1045   | caudal type homeobox 2                                                    |
| GO | blood vessel development                  | 5  | 40  | 0.037 | 1121   | choroideremia (Rab escort protein 1)                                      |
| GO | blood vessel development                  | 5  | 40  | 0.037 | 1289   | collagen, type V, alpha 1                                                 |
| GO | blood vessel development                  | 5  | 40  | 0.037 | 3685   | integrin, alpha V (vitronectin receptor, alpha polypeptide, antigen CD51) |

|    |                          |    |     |       |        |                                                           |
|----|--------------------------|----|-----|-------|--------|-----------------------------------------------------------|
| GO | blood vessel development | 5  | 40  | 0.037 | 80712  | ESX homeobox 1                                            |
| GO | anti-apoptosis           | 14 | 178 | 0.038 | 332    | baculoviral IAP repeat-containing 5                       |
| GO | anti-apoptosis           | 14 | 178 | 0.038 | 347902 | adhesion molecule with Ig-like domain 2                   |
| GO | anti-apoptosis           | 14 | 178 | 0.038 | 348    | apolipoprotein E                                          |
| GO | anti-apoptosis           | 14 | 178 | 0.038 | 355    | Fas (TNF receptor superfamily, member 6)                  |
| GO | anti-apoptosis           | 14 | 178 | 0.038 | 5081   | paired box 7                                              |
| GO | anti-apoptosis           | 14 | 178 | 0.038 | 51499  | TP53 regulated inhibitor of apoptosis 1                   |
| GO | anti-apoptosis           | 14 | 178 | 0.038 | 57099  | apoptosis, caspase activation inhibitor                   |
| GO | anti-apoptosis           | 14 | 178 | 0.038 | 57144  | p21 protein (Cdc42/Rac)-activated kinase 7                |
| GO | anti-apoptosis           | 14 | 178 | 0.038 | 597    | BCL2-related protein A1                                   |
| GO | anti-apoptosis           | 14 | 178 | 0.038 | 60675  | prokineticin 2                                            |
| GO | anti-apoptosis           | 14 | 178 | 0.038 | 6347   | chemokine (C-C motif) ligand 2                            |
| GO | anti-apoptosis           | 14 | 178 | 0.038 | 6422   | secreted frizzled-related protein 1                       |
| GO | anti-apoptosis           | 14 | 178 | 0.038 | 8626   | tumor protein p63                                         |
| GO | anti-apoptosis           | 14 | 178 | 0.038 | 8835   | suppressor of cytokine signaling 2                        |
| GO | cell division            | 18 | 246 | 0.039 | 10051  | structural maintenance of chromosomes 4                   |
| GO | cell division            | 18 | 246 | 0.039 | 113130 | cell division cycle associated 5                          |
| GO | cell division            | 18 | 246 | 0.039 | 1164   | CDC28 protein kinase regulatory subunit 2                 |
| GO | cell division            | 18 | 246 | 0.039 | 220134 | spindle and kinetochore associated complex subunit 1      |
| GO | cell division            | 18 | 246 | 0.039 | 332    | baculoviral IAP repeat-containing 5                       |
| GO | cell division            | 18 | 246 | 0.039 | 55165  | centrosomal protein 55kDa                                 |
| GO | cell division            | 18 | 246 | 0.039 | 55207  | ADP-ribosylation factor-like 8B                           |
| GO | cell division            | 18 | 246 | 0.039 | 55752  | septin 11                                                 |
| GO | cell division            | 18 | 246 | 0.039 | 64151  | non-SMC condensin I complex, subunit G                    |
| GO | cell division            | 18 | 246 | 0.039 | 6683   | spastin                                                   |
| GO | cell division            | 18 | 246 | 0.039 | 79172  | centromere protein O                                      |
| GO | cell division            | 18 | 246 | 0.039 | 79187  | fibronectin type III and SPRY domain containing 1         |
| GO | cell division            | 18 | 246 | 0.039 | 8091   | high mobility group AT-hook 2                             |
| GO | cell division            | 18 | 246 | 0.039 | 84552  | par-6 partitioning defective 6 homolog gamma (C. elegans) |
| GO | cell division            | 18 | 246 | 0.039 | 8872   | cell division cycle 123 homolog (S. cerevisiae)           |
| GO | cell division            | 18 | 246 | 0.039 | 890    | cyclin A2                                                 |
| GO | cell division            | 18 | 246 | 0.039 | 898    | cyclin E1                                                 |
| GO | cell division            | 18 | 246 | 0.039 | 93323  | HAUS augmin-like complex, subunit 8                       |
| GO | aging                    | 8  | 83  | 0.039 | 1984   | eukaryotic translation initiation factor 5A               |
| GO | aging                    | 8  | 83  | 0.039 | 2027   | enolase 3 (beta, muscle)                                  |
| GO | aging                    | 8  | 83  | 0.039 | 5028   | purinergic receptor P2Y, G-protein coupled, 1             |

|    |                                            |   |    |       |                                                                                    |
|----|--------------------------------------------|---|----|-------|------------------------------------------------------------------------------------|
| GO | aging                                      | 8 | 83 | 0.039 | 5588 protein kinase C, theta                                                       |
| GO | aging                                      | 8 | 83 | 0.039 | 7037 transferrin receptor (p90, CD71)                                              |
| GO | aging                                      | 8 | 83 | 0.039 | 7046 transforming growth factor, beta receptor 1                                   |
| GO | aging                                      | 8 | 83 | 0.039 | 7078 TIMP metalloproteinase inhibitor 3                                            |
| GO | aging                                      | 8 | 83 | 0.039 | 8835 suppressor of cytokine signaling 2                                            |
| GO | Arp2/3 protein complex                     | 2 | 7  | 0.039 | 10096 ARP3 actin-related protein 3 homolog (yeast)                                 |
| GO | Arp2/3 protein complex                     | 2 | 7  | 0.039 | 10097 ARP2 actin-related protein 2 homolog (yeast)                                 |
| GO | small nucleolar ribonucleoprotein comp     | 2 | 7  | 0.039 | 10199 M-phase phosphoprotein 10 (U3 small nucleolar ribonucleoprotein)             |
| GO | small nucleolar ribonucleoprotein comp     | 2 | 7  | 0.039 | 10528 NOP56 ribonucleoprotein homolog (yeast)                                      |
| GO | DNA damage response, signal transduct      | 2 | 7  | 0.039 | 1026 cyclin-dependent kinase inhibitor 1A (p21, Cip1)                              |
| GO | DNA damage response, signal transduct      | 2 | 7  | 0.039 | 51499 TP53 regulated inhibitor of apoptosis 1                                      |
| GO | regulation of transcription from RNA po    | 2 | 7  | 0.039 | 10622 polymerase (RNA) III (DNA directed) polypeptide G (32kD)                     |
| GO | regulation of transcription from RNA po    | 2 | 7  | 0.039 | 672 breast cancer 1, early onset                                                   |
| GO | tRNA modification                          | 2 | 7  | 0.039 | 10785 WD repeat domain 4                                                           |
| GO | tRNA modification                          | 2 | 7  | 0.039 | 6741 Sjogren syndrome antigen B (autoantigen La)                                   |
| GO | detection of mechanical stimulus involv    | 2 | 7  | 0.039 | 1301 collagen, type XI, alpha 1                                                    |
| GO | detection of mechanical stimulus involv    | 2 | 7  | 0.039 | 6657 SRY (sex determining region Y)-box 2                                          |
| GO | suckling behavior                          | 2 | 7  | 0.039 | 130507 ubiquitin protein ligase E3 component n-recognin 3 (putative)               |
| GO | suckling behavior                          | 2 | 7  | 0.039 | 5021 oxytocin receptor                                                             |
| GO | positive regulation of blood coagulation   | 2 | 7  | 0.039 | 2149 coagulation factor II (thrombin) receptor                                     |
| GO | positive regulation of blood coagulation   | 2 | 7  | 0.039 | 5054 serpin peptidase inhibitor, clade E (nexin, plasminogen activator inhibitor t |
| GO | protein heterotetramerization              | 2 | 7  | 0.039 | 23590 prenyl (decaprenyl) diphosphate synthase, subunit 1                          |
| GO | protein heterotetramerization              | 2 | 7  | 0.039 | 6241 ribonucleotide reductase M2                                                   |
| GO | branched chain family amino acid catab     | 2 | 7  | 0.039 | 26275 3-hydroxyisobutyryl-Coenzyme A hydrolase                                     |
| GO | branched chain family amino acid catab     | 2 | 7  | 0.039 | 586 branched chain aminotransferase 1, cytosolic                                   |
| GO | receptor clustering                        | 2 | 7  | 0.039 | 2898 glutamate receptor, ionotropic, kainate 2                                     |
| GO | receptor clustering                        | 2 | 7  | 0.039 | 773 calcium channel, voltage-dependent, P/Q type, alpha 1A subunit                 |
| GO | negative regulation of fatty acid biosynt  | 2 | 7  | 0.039 | 341 apolipoprotein C-I                                                             |
| GO | negative regulation of fatty acid biosynt  | 2 | 7  | 0.039 | 672 breast cancer 1, early onset                                                   |
| GO | positive regulation of cholesterol esterif | 2 | 7  | 0.039 | 341 apolipoprotein C-I                                                             |
| GO | positive regulation of cholesterol esterif | 2 | 7  | 0.039 | 348 apolipoprotein E                                                               |
| GO | response to reactive oxygen species        | 2 | 7  | 0.039 | 348 apolipoprotein E                                                               |
| GO | response to reactive oxygen species        | 2 | 7  | 0.039 | 5054 serpin peptidase inhibitor, clade E (nexin, plasminogen activator inhibitor t |
| GO | negative regulation of smooth muscle c     | 2 | 7  | 0.039 | 3516 recombination signal binding protein for immunoglobulin kappa J region        |
| GO | negative regulation of smooth muscle c     | 2 | 7  | 0.039 | 5054 serpin peptidase inhibitor, clade E (nexin, plasminogen activator inhibitor t |
| GO | G2 phase of mitotic cell cycle             | 2 | 7  | 0.039 | 3838 karyopherin alpha 2 (RAG cohort 1, importin alpha 1)                          |

|    |                                           |    |     |       |                                                                                     |
|----|-------------------------------------------|----|-----|-------|-------------------------------------------------------------------------------------|
| GO | G2 phase of mitotic cell cycle            | 2  | 7   | 0.039 | 641 Bloom syndrome, RecQ helicase-like                                              |
| GO | postreplication repair                    | 2  | 7   | 0.039 | 4436 mutS homolog 2, colon cancer, nonpolyposis type 1 (E. coli)                    |
| GO | postreplication repair                    | 2  | 7   | 0.039 | 672 breast cancer 1, early onset                                                    |
| GO | spinal cord development                   | 2  | 7   | 0.039 | 4763 neurofibromin 1                                                                |
| GO | spinal cord development                   | 2  | 7   | 0.039 | 6586 slit homolog 3 (Drosophila)                                                    |
| GO | sympathetic nervous system developme      | 2  | 7   | 0.039 | 4763 neurofibromin 1                                                                |
| GO | sympathetic nervous system developme      | 2  | 7   | 0.039 | 8626 tumor protein p63                                                              |
| GO | 3',5'-cyclic-GMP phosphodiesterase acti   | 2  | 7   | 0.039 | 50940 phosphodiesterase 11A                                                         |
| GO | 3',5'-cyclic-GMP phosphodiesterase acti   | 2  | 7   | 0.039 | 5145 phosphodiesterase 6A, cGMP-specific, rod, alpha                                |
| GO | cAMP catabolic process                    | 2  | 7   | 0.039 | 50940 phosphodiesterase 11A                                                         |
| GO | cAMP catabolic process                    | 2  | 7   | 0.039 | 5140 phosphodiesterase 3B, cGMP-inhibited                                           |
| GO | signal peptide processing                 | 2  | 7   | 0.039 | 5125 proprotein convertase subtilisin/kexin type 5                                  |
| GO | signal peptide processing                 | 2  | 7   | 0.039 | 90701 SEC11 homolog C (S. cerevisiae)                                               |
| GO | transcription                             | 7  | 69  | 0.041 | 10622 polymerase (RNA) III (DNA directed) polypeptide G (32kD)                      |
| GO | transcription                             | 7  | 69  | 0.041 | 170082 transcription elongation factor A (SII) N-terminal and central domain contai |
| GO | transcription                             | 7  | 69  | 0.041 | 25885 polymerase (RNA) I polypeptide A, 194kDa                                      |
| GO | transcription                             | 7  | 69  | 0.041 | 4291 myeloid leukemia factor 1                                                      |
| GO | transcription                             | 7  | 69  | 0.041 | 5440 polymerase (RNA) II (DNA directed) polypeptide K, 7.0kDa                       |
| GO | transcription                             | 7  | 69  | 0.041 | 5558 primase, DNA, polypeptide 2 (58kDa)                                            |
| GO | transcription                             | 7  | 69  | 0.041 | 84172 polymerase (RNA) I polypeptide B, 128kDa                                      |
| GO | extracellular matrix structural constitue | 7  | 69  | 0.041 | 1282 collagen, type IV, alpha 1                                                     |
| GO | extracellular matrix structural constitue | 7  | 69  | 0.041 | 1284 collagen, type IV, alpha 2                                                     |
| GO | extracellular matrix structural constitue | 7  | 69  | 0.041 | 1288 collagen, type IV, alpha 6                                                     |
| GO | extracellular matrix structural constitue | 7  | 69  | 0.041 | 1289 collagen, type V, alpha 1                                                      |
| GO | extracellular matrix structural constitue | 7  | 69  | 0.041 | 1290 collagen, type V, alpha 2                                                      |
| GO | extracellular matrix structural constitue | 7  | 69  | 0.041 | 1301 collagen, type XI, alpha 1                                                     |
| GO | extracellular matrix structural constitue | 7  | 69  | 0.041 | 4060 lumican                                                                        |
| GO | fatty acid binding                        | 3  | 17  | 0.042 | 2171 fatty acid binding protein 5 (psoriasis-associated)                            |
| GO | fatty acid binding                        | 3  | 17  | 0.042 | 2172 fatty acid binding protein 6, ileal                                            |
| GO | fatty acid binding                        | 3  | 17  | 0.042 | 341 apolipoprotein C-I                                                              |
| GO | cardiac muscle contraction                | 3  | 17  | 0.042 | 70 actin, alpha, cardiac muscle 1                                                   |
| GO | cardiac muscle contraction                | 3  | 17  | 0.042 | 7137 troponin I type 3 (cardiac)                                                    |
| GO | cardiac muscle contraction                | 3  | 17  | 0.042 | 7168 tropomyosin 1 (alpha)                                                          |
| GO | lipid binding                             | 10 | 116 | 0.044 | 116362 retinol binding protein 7, cellular                                          |
| GO | lipid binding                             | 10 | 116 | 0.044 | 1622 diazepam binding inhibitor (GABA receptor modulator, acyl-Coenzyme A bi        |
| GO | lipid binding                             | 10 | 116 | 0.044 | 2171 fatty acid binding protein 5 (psoriasis-associated)                            |

|    |                                       |    |     |       |                                                                                           |
|----|---------------------------------------|----|-----|-------|-------------------------------------------------------------------------------------------|
| GO | lipid binding                         | 10 | 116 | 0.044 | 2172 fatty acid binding protein 6, ileal                                                  |
| GO | lipid binding                         | 10 | 116 | 0.044 | 26207 phosphatidylinositol transfer protein, cytoplasmic 1                                |
| GO | lipid binding                         | 10 | 116 | 0.044 | 348 apolipoprotein E                                                                      |
| GO | lipid binding                         | 10 | 116 | 0.044 | 516 ATP synthase, H <sup>+</sup> transporting, mitochondrial F0 complex, subunit C1 (subu |
| GO | lipid binding                         | 10 | 116 | 0.044 | 5360 phospholipid transfer protein                                                        |
| GO | lipid binding                         | 10 | 116 | 0.044 | 581 BCL2-associated X protein                                                             |
| GO | lipid binding                         | 10 | 116 | 0.044 | 5947 retinol binding protein 1, cellular                                                  |
| GO | G1/S transition of mitotic cell cycle | 5  | 42  | 0.044 | 1026 cyclin-dependent kinase inhibitor 1A (p21, Cip1)                                     |
| GO | G1/S transition of mitotic cell cycle | 5  | 42  | 0.044 | 113130 cell division cycle associated 5                                                   |
| GO | G1/S transition of mitotic cell cycle | 5  | 42  | 0.044 | 3624 inhibin, beta A                                                                      |
| GO | G1/S transition of mitotic cell cycle | 5  | 42  | 0.044 | 586 branched chain aminotransferase 1, cytosolic                                          |
| GO | G1/S transition of mitotic cell cycle | 5  | 42  | 0.044 | 898 cyclin E1                                                                             |
| GO | chromosome segregation                | 5  | 42  | 0.044 | 220134 spindle and kinetochore associated complex subunit 1                               |
| GO | chromosome segregation                | 5  | 42  | 0.044 | 332 baculoviral IAP repeat-containing 5                                                   |
| GO | chromosome segregation                | 5  | 42  | 0.044 | 55207 ADP-ribosylation factor-like 8B                                                     |
| GO | chromosome segregation                | 5  | 42  | 0.044 | 672 breast cancer 1, early onset                                                          |
| GO | chromosome segregation                | 5  | 42  | 0.044 | 79172 centromere protein O                                                                |
| GO | RNA splicing                          | 18 | 251 | 0.045 | 10189 THO complex 4                                                                       |
| GO | RNA splicing                          | 18 | 251 | 0.045 | 10199 M-phase phosphoprotein 10 (U3 small nucleolar ribonucleoprotein)                    |
| GO | RNA splicing                          | 18 | 251 | 0.045 | 10212 DEAD (Asp-Glu-Ala-Asp) box polypeptide 39                                           |
| GO | RNA splicing                          | 18 | 251 | 0.045 | 10465 peptidylprolyl isomerase H (cyclophilin H)                                          |
| GO | RNA splicing                          | 18 | 251 | 0.045 | 10492 synaptotagmin binding, cytoplasmic RNA interacting protein                          |
| GO | RNA splicing                          | 18 | 251 | 0.045 | 135295 splicing factor, arginine/serine-rich 13B                                          |
| GO | RNA splicing                          | 18 | 251 | 0.045 | 23658 LSM5 homolog, U6 small nuclear RNA associated ( <i>S. cerevisiae</i> )              |
| GO | RNA splicing                          | 18 | 251 | 0.045 | 27258 LSM3 homolog, U6 small nuclear RNA associated ( <i>S. cerevisiae</i> )              |
| GO | RNA splicing                          | 18 | 251 | 0.045 | 3183 heterogeneous nuclear ribonucleoprotein C (C1/C2)                                    |
| GO | RNA splicing                          | 18 | 251 | 0.045 | 51645 peptidylprolyl isomerase (cyclophilin)-like 1                                       |
| GO | RNA splicing                          | 18 | 251 | 0.045 | 53981 cleavage and polyadenylation specific factor 2, 100kDa                              |
| GO | RNA splicing                          | 18 | 251 | 0.045 | 5440 polymerase (RNA) II (DNA directed) polypeptide K, 7.0kDa                             |
| GO | RNA splicing                          | 18 | 251 | 0.045 | 58155 polypyrimidine tract binding protein 2                                              |
| GO | RNA splicing                          | 18 | 251 | 0.045 | 6637 small nuclear ribonucleoprotein polypeptide G                                        |
| GO | RNA splicing                          | 18 | 251 | 0.045 | 7490 Wilms tumor 1                                                                        |
| GO | RNA splicing                          | 18 | 251 | 0.045 | 79833 gem (nuclear organelle) associated protein 6                                        |
| GO | RNA splicing                          | 18 | 251 | 0.045 | 8458 transcription termination factor, RNA polymerase II                                  |
| GO | RNA splicing                          | 18 | 251 | 0.045 | 8563 THO complex 5                                                                        |
| GO | cell adhesion                         | 33 | 522 | 0.046 | 1000 cadherin 2, type 1, N-cadherin (neuronal)                                            |

|    |                                          |    |     |       |        |                                                                           |
|----|------------------------------------------|----|-----|-------|--------|---------------------------------------------------------------------------|
| GO | cell adhesion                            | 33 | 522 | 0.046 | 1002   | cadherin 4, type 1, R-cadherin (retinal)                                  |
| GO | cell adhesion                            | 33 | 522 | 0.046 | 10457  | glycoprotein (transmembrane) nmb                                          |
| GO | cell adhesion                            | 33 | 522 | 0.046 | 11149  | blood vessel epicardial substance                                         |
| GO | cell adhesion                            | 33 | 522 | 0.046 | 120114 | FAT tumor suppressor homolog 3 (Drosophila)                               |
| GO | cell adhesion                            | 33 | 522 | 0.046 | 1288   | collagen, type IV, alpha 6                                                |
| GO | cell adhesion                            | 33 | 522 | 0.046 | 1289   | collagen, type V, alpha 1                                                 |
| GO | cell adhesion                            | 33 | 522 | 0.046 | 1301   | collagen, type XI, alpha 1                                                |
| GO | cell adhesion                            | 33 | 522 | 0.046 | 145864 | hyaluronan and proteoglycan link protein 3                                |
| GO | cell adhesion                            | 33 | 522 | 0.046 | 1830   | desmoglein 3 (pemphigus vulgaris antigen)                                 |
| GO | cell adhesion                            | 33 | 522 | 0.046 | 22801  | integrin, alpha 11                                                        |
| GO | cell adhesion                            | 33 | 522 | 0.046 | 23705  | cell adhesion molecule 1                                                  |
| GO | cell adhesion                            | 33 | 522 | 0.046 | 23768  | fibronectin leucine rich transmembrane protein 2                          |
| GO | cell adhesion                            | 33 | 522 | 0.046 | 26032  | sushi domain containing 5                                                 |
| GO | cell adhesion                            | 33 | 522 | 0.046 | 285761 | discoidin, CUB and LCCL domain containing 1                               |
| GO | cell adhesion                            | 33 | 522 | 0.046 | 347902 | adhesion molecule with Ig-like domain 2                                   |
| GO | cell adhesion                            | 33 | 522 | 0.046 | 3685   | integrin, alpha V (vitronectin receptor, alpha polypeptide, antigen CD51) |
| GO | cell adhesion                            | 33 | 522 | 0.046 | 3694   | integrin, beta 6                                                          |
| GO | cell adhesion                            | 33 | 522 | 0.046 | 3918   | laminin, gamma 2                                                          |
| GO | cell adhesion                            | 33 | 522 | 0.046 | 5101   | protocadherin 9                                                           |
| GO | cell adhesion                            | 33 | 522 | 0.046 | 56104  | protocadherin gamma subfamily B, 1                                        |
| GO | cell adhesion                            | 33 | 522 | 0.046 | 56126  | protocadherin beta 10                                                     |
| GO | cell adhesion                            | 33 | 522 | 0.046 | 56133  | protocadherin beta 2                                                      |
| GO | cell adhesion                            | 33 | 522 | 0.046 | 5754   | PTK7 protein tyrosine kinase 7                                            |
| GO | cell adhesion                            | 33 | 522 | 0.046 | 57575  | protocadherin 10                                                          |
| GO | cell adhesion                            | 33 | 522 | 0.046 | 57642  | collagen, type XX, alpha 1                                                |
| GO | cell adhesion                            | 33 | 522 | 0.046 | 6347   | chemokine (C-C motif) ligand 2                                            |
| GO | cell adhesion                            | 33 | 522 | 0.046 | 667    | dystonin                                                                  |
| GO | cell adhesion                            | 33 | 522 | 0.046 | 6695   | sparc/osteonectin, cwcv and kazal-like domains proteoglycan (testican) 1  |
| GO | cell adhesion                            | 33 | 522 | 0.046 | 7058   | thrombospondin 2                                                          |
| GO | cell adhesion                            | 33 | 522 | 0.046 | 9076   | claudin 1                                                                 |
| GO | cell adhesion                            | 33 | 522 | 0.046 | 953    | ectonucleoside triphosphate diphosphohydrolase 1                          |
| GO | cell adhesion                            | 33 | 522 | 0.046 | 9635   | chloride channel accessory 2                                              |
| GO | regulation of myelination                | 1  | 1   | 0.046 | 1000   | cadherin 2, type 1, N-cadherin (neuronal)                                 |
| GO | regulation of myosin II filament assembl | 1  | 1   | 0.046 | 10096  | ARP3 actin-related protein 3 homolog (yeast)                              |
| GO | D5 dopamine receptor binding             | 1  | 1   | 0.046 | 10672  | guanine nucleotide binding protein (G protein), alpha 13                  |
| GO | positive regulation of locomotion        | 1  | 1   | 0.046 | 11149  | blood vessel epicardial substance                                         |

|    |                                           |   |   |       |        |                                                                        |
|----|-------------------------------------------|---|---|-------|--------|------------------------------------------------------------------------|
| GO | D-ribose catabolic process                | 1 | 1 | 0.046 | 11164  | nudix (nucleoside diphosphate linked moiety X)-type motif 5            |
| GO | ribonucleoside diphosphate catabolic pi   | 1 | 1 | 0.046 | 11164  | nudix (nucleoside diphosphate linked moiety X)-type motif 5            |
| GO | meiosis I                                 | 1 | 1 | 0.046 | 1164   | CDC28 protein kinase regulatory subunit 2                              |
| GO | stem cell development                     | 1 | 1 | 0.046 | 124540 | musashi homolog 2 (Drosophila)                                         |
| GO | integrin biosynthetic process             | 1 | 1 | 0.046 | 1289   | collagen, type V, alpha 1                                              |
| GO | glycerate kinase activity                 | 1 | 1 | 0.046 | 132158 | glycerate kinase                                                       |
| GO | nuclear mRNA 5'-splice site recognition   | 1 | 1 | 0.046 | 135295 | splicing factor, arginine/serine-rich 13B                              |
| GO | coumarin metabolic process                | 1 | 1 | 0.046 | 1543   | cytochrome P450, family 1, subfamily A, polypeptide 1                  |
| GO | dibenzo-p-dioxin catabolic process        | 1 | 1 | 0.046 | 1543   | cytochrome P450, family 1, subfamily A, polypeptide 1                  |
| GO | flavonoid 3'-monooxygenase activity       | 1 | 1 | 0.046 | 1543   | cytochrome P450, family 1, subfamily A, polypeptide 1                  |
| GO | flavonoid metabolic process               | 1 | 1 | 0.046 | 1543   | cytochrome P450, family 1, subfamily A, polypeptide 1                  |
| GO | insecticide metabolic process             | 1 | 1 | 0.046 | 1543   | cytochrome P450, family 1, subfamily A, polypeptide 1                  |
| GO | oxidoreductase activity, acting on diphe  | 1 | 1 | 0.046 | 1543   | cytochrome P450, family 1, subfamily A, polypeptide 1                  |
| GO | response to herbicide                     | 1 | 1 | 0.046 | 1543   | cytochrome P450, family 1, subfamily A, polypeptide 1                  |
| GO | response to iron(III) ion                 | 1 | 1 | 0.046 | 1543   | cytochrome P450, family 1, subfamily A, polypeptide 1                  |
| GO | (S)-2-(5-amino-1-(5-phospho-D-ribosyl)i   | 1 | 1 | 0.046 | 158    | adenylosuccinate lyase                                                 |
| GO | N6-(1,2-dicarboxyethyl)AMP AMP-lyase      | 1 | 1 | 0.046 | 158    | adenylosuccinate lyase                                                 |
| GO | deoxyguanosine kinase activity            | 1 | 1 | 0.046 | 1716   | deoxyguanosine kinase                                                  |
| GO | dGTP metabolic process                    | 1 | 1 | 0.046 | 1716   | deoxyguanosine kinase                                                  |
| GO | guanosine metabolic process               | 1 | 1 | 0.046 | 1716   | deoxyguanosine kinase                                                  |
| GO | site-specific endodeoxyribonuclease act   | 1 | 1 | 0.046 | 1763   | DNA replication helicase 2 homolog (yeast)                             |
| GO | euchromatin                               | 1 | 1 | 0.046 | 1788   | DNA (cytosine-5-)-methyltransferase 3 alpha                            |
| GO | dTDP biosynthetic process                 | 1 | 1 | 0.046 | 1841   | deoxythymidylate kinase (thymidylate kinase)                           |
| GO | nucleoside phosphate kinase activity      | 1 | 1 | 0.046 | 1841   | deoxythymidylate kinase (thymidylate kinase)                           |
| GO | thymidylate kinase activity               | 1 | 1 | 0.046 | 1841   | deoxythymidylate kinase (thymidylate kinase)                           |
| GO | alpha-1,4-N-acetylgalactosaminyltransf    | 1 | 1 | 0.046 | 2135   | exostoses (multiple)-like 2                                            |
| GO | mesodermal cell fate specification        | 1 | 1 | 0.046 | 2139   | eyes absent homolog 2 (Drosophila)                                     |
| GO | nucleus accumbens development             | 1 | 1 | 0.046 | 220    | aldehyde dehydrogenase 1 family, member A3                             |
| GO | optic cup morphogenesis involved in ca    | 1 | 1 | 0.046 | 220    | aldehyde dehydrogenase 1 family, member A3                             |
| GO | ferredoxin-NADP+ reductase activity       | 1 | 1 | 0.046 | 2232   | ferredoxin reductase                                                   |
| GO | double-stranded DNA specific exodeoxy     | 1 | 1 | 0.046 | 2237   | flap structure-specific endonuclease 1                                 |
| GO | regulation of calcium ion transport via s | 1 | 1 | 0.046 | 2281   | FK506 binding protein 1B, 12.6 kDa                                     |
| GO | ribose-5-phosphate isomerase activity     | 1 | 1 | 0.046 | 22934  | ribose 5-phosphate isomerase A                                         |
| GO | regulation of cell cycle arrest           | 1 | 1 | 0.046 | 2305   | forkhead box M1                                                        |
| GO | phosphoribosylamine-glycine ligase acti   | 1 | 1 | 0.046 | 2618   | phosphoribosylglycinamide formyltransferase, phosphoribosylglycinamide |
| GO | phosphoribosylformylglycinamide cyc       | 1 | 1 | 0.046 | 2618   | phosphoribosylglycinamide formyltransferase, phosphoribosylglycinamide |



|    |                                           |   |   |       |        |                                                                          |
|----|-------------------------------------------|---|---|-------|--------|--------------------------------------------------------------------------|
| GO | phosphoribosylglycinamide formyltrans     | 1 | 1 | 0.046 | 2618   | phosphoribosylglycinamide formyltransferase, phosphoribosylglycinamide   |
| GO | 3-hydroxyisobutyryl-CoA hydrolase acti    | 1 | 1 | 0.046 | 26275  | 3-hydroxyisobutyryl-Coenzyme A hydrolase                                 |
| GO | glycine amidinotransferase activity       | 1 | 1 | 0.046 | 2628   | glycine amidinotransferase (L-arginine:glycine amidinotransferase)       |
| GO | glycine decarboxylation via glycine cleav | 1 | 1 | 0.046 | 2653   | glycine cleavage system protein H (aminomethyl carrier)                  |
| GO | cochlea morphogenesis                     | 1 | 1 | 0.046 | 2736   | GLI family zinc finger 2                                                 |
| GO | floor plate formation                     | 1 | 1 | 0.046 | 2736   | GLI family zinc finger 2                                                 |
| GO | ventral spinal cord development           | 1 | 1 | 0.046 | 2736   | GLI family zinc finger 2                                                 |
| GO | glucose-1,6-bisphosphate synthase acti    | 1 | 1 | 0.046 | 283209 | phosphoglucomutase 2-like 1                                              |
| GO | intramolecular transferase activity, pho  | 1 | 1 | 0.046 | 283209 | phosphoglucomutase 2-like 1                                              |
| GO | induction of programmed cell death in r   | 1 | 1 | 0.046 | 2898   | glutamate receptor, ionotropic, kainate 2                                |
| GO | chondroitin-glucuronate 5-epimerase ac    | 1 | 1 | 0.046 | 29940  | dermatan sulfate epimerase                                               |
| GO | positive regulation of calcineurin-NFAT : | 1 | 1 | 0.046 | 29995  | LIM and cysteine-rich domains 1                                          |
| GO | regulation of cardiac muscle hypertroph   | 1 | 1 | 0.046 | 29995  | LIM and cysteine-rich domains 1                                          |
| GO | 3-hydroxy-2-methylbutyryl-CoA dehydr      | 1 | 1 | 0.046 | 3028   | hydroxysteroid (17-beta) dehydrogenase 10                                |
| GO | 7-alpha-hydroxysteroid dehydrogenase      | 1 | 1 | 0.046 | 3028   | hydroxysteroid (17-beta) dehydrogenase 10                                |
| GO | acetoacetyl-CoA reductase activity        | 1 | 1 | 0.046 | 3028   | hydroxysteroid (17-beta) dehydrogenase 10                                |
| GO | interphase microtubule organizing cent    | 1 | 1 | 0.046 | 332    | baculoviral IAP repeat-containing 5                                      |
| GO | spindle checkpoint                        | 1 | 1 | 0.046 | 332    | baculoviral IAP repeat-containing 5                                      |
| GO | negative regulation of phosphatidylchol   | 1 | 1 | 0.046 | 341    | apolipoprotein C-I                                                       |
| GO | plasma lipoprotein particle remodeling    | 1 | 1 | 0.046 | 341    | apolipoprotein C-I                                                       |
| GO | regulation of lipid transport             | 1 | 1 | 0.046 | 341    | apolipoprotein C-I                                                       |
| GO | maintenance of location in cell           | 1 | 1 | 0.046 | 348    | apolipoprotein E                                                         |
| GO | metal chelating activity                  | 1 | 1 | 0.046 | 348    | apolipoprotein E                                                         |
| GO | positive regulation of low-density lipopr | 1 | 1 | 0.046 | 348    | apolipoprotein E                                                         |
| GO | recombinase activity                      | 1 | 1 | 0.046 | 3516   | recombination signal binding protein for immunoglobulin kappa J region   |
| GO | interleukin-11 receptor binding           | 1 | 1 | 0.046 | 3589   | interleukin 11                                                           |
| GO | activin A complex                         | 1 | 1 | 0.046 | 3624   | inhibin, beta A                                                          |
| GO | cellular potassium ion homeostasis        | 1 | 1 | 0.046 | 3778   | potassium large conductance calcium-activated channel, subfamily M, alph |
| GO | eye blink reflex                          | 1 | 1 | 0.046 | 3778   | potassium large conductance calcium-activated channel, subfamily M, alph |
| GO | large conductance calcium-activated po    | 1 | 1 | 0.046 | 3778   | potassium large conductance calcium-activated channel, subfamily M, alph |
| GO | micturition                               | 1 | 1 | 0.046 | 3778   | potassium large conductance calcium-activated channel, subfamily M, alph |
| GO | negative regulation of cell volume        | 1 | 1 | 0.046 | 3778   | potassium large conductance calcium-activated channel, subfamily M, alph |
| GO | regulation of aldosterone metabolic pro   | 1 | 1 | 0.046 | 3778   | potassium large conductance calcium-activated channel, subfamily M, alph |
| GO | response to carbon monoxide               | 1 | 1 | 0.046 | 3778   | potassium large conductance calcium-activated channel, subfamily M, alph |
| GO | CD8 receptor binding                      | 1 | 1 | 0.046 | 3932   | lymphocyte-specific protein tyrosine kinase                              |
| GO | regulation of lymphocyte activation       | 1 | 1 | 0.046 | 3932   | lymphocyte-specific protein tyrosine kinase                              |

|    |                                            |   |   |       |                                                                                    |
|----|--------------------------------------------|---|---|-------|------------------------------------------------------------------------------------|
| GO | regulation of intracellular protein transp | 1 | 1 | 0.046 | 3936 lymphocyte cytosolic protein 1 (L-plastin)                                    |
| GO | negative regulation of metabolic proces    | 1 | 1 | 0.046 | 3952 leptin                                                                        |
| GO | fibrillar collagen                         | 1 | 1 | 0.046 | 4060 lumican                                                                       |
| GO | negative regulation of natural killer cell | 1 | 1 | 0.046 | 409 arrestin, beta 2                                                               |
| GO | adrenocorticotropin receptor activity      | 1 | 1 | 0.046 | 4158 melanocortin 2 receptor (adrenocorticotropic hormone)                         |
| GO | male meiosis chromosome segregation        | 1 | 1 | 0.046 | 4292 mutL homolog 1, colon cancer, nonpolyposis type 2 (E. coli)                   |
| GO | meiotic metaphase I plate congression      | 1 | 1 | 0.046 | 4292 mutL homolog 1, colon cancer, nonpolyposis type 2 (E. coli)                   |
| GO | nuclear-transcribed mRNA poly(A) tail sl   | 1 | 1 | 0.046 | 4292 mutL homolog 1, colon cancer, nonpolyposis type 2 (E. coli)                   |
| GO | resolution of meiotic recombination inte   | 1 | 1 | 0.046 | 4292 mutL homolog 1, colon cancer, nonpolyposis type 2 (E. coli)                   |
| GO | spindle midzone assembly involved in m     | 1 | 1 | 0.046 | 4292 mutL homolog 1, colon cancer, nonpolyposis type 2 (E. coli)                   |
| GO | development during symbiotic interacti     | 1 | 1 | 0.046 | 4734 neural precursor cell expressed, developmentally down-regulated 4             |
| GO | negative regulation of sodium ion transp   | 1 | 1 | 0.046 | 4734 neural precursor cell expressed, developmentally down-regulated 4             |
| GO | negative regulation of transcription fror  | 1 | 1 | 0.046 | 4734 neural precursor cell expressed, developmentally down-regulated 4             |
| GO | positive regulation of nucleocytoplasmic   | 1 | 1 | 0.046 | 4734 neural precursor cell expressed, developmentally down-regulated 4             |
| GO | sodium channel inhibitor activity          | 1 | 1 | 0.046 | 4734 neural precursor cell expressed, developmentally down-regulated 4             |
| GO | transmission of virus                      | 1 | 1 | 0.046 | 4734 neural precursor cell expressed, developmentally down-regulated 4             |
| GO | forebrain astrocyte development            | 1 | 1 | 0.046 | 4763 neurofibromin 1                                                               |
| GO | negative regulation of transcription fact  | 1 | 1 | 0.046 | 4763 neurofibromin 1                                                               |
| GO | regulation of glial cell differentiation   | 1 | 1 | 0.046 | 4763 neurofibromin 1                                                               |
| GO | negative regulation of myeloid leukocyt    | 1 | 1 | 0.046 | 4830 non-metastatic cells 1, protein (NM23A) expressed in                          |
| GO | nucleoside diphosphate phosphorylatio      | 1 | 1 | 0.046 | 4830 non-metastatic cells 1, protein (NM23A) expressed in                          |
| GO | oxidized purine base lesion DNA N-glycc    | 1 | 1 | 0.046 | 4968 8-oxoguanine DNA glycosylase                                                  |
| GO | oxytocin receptor activity                 | 1 | 1 | 0.046 | 5021 oxytocin receptor                                                             |
| GO | negative regulation of vascular wound h    | 1 | 1 | 0.046 | 5054 serpin peptidase inhibitor, clade E (nexin, plasminogen activator inhibitor t |
| GO | negative regulation of wound healing       | 1 | 1 | 0.046 | 5054 serpin peptidase inhibitor, clade E (nexin, plasminogen activator inhibitor t |
| GO | positive regulation of leukotriene produ   | 1 | 1 | 0.046 | 5054 serpin peptidase inhibitor, clade E (nexin, plasminogen activator inhibitor t |
| GO | satellite cell commitment                  | 1 | 1 | 0.046 | 5081 paired box 7                                                                  |
| GO | cyclic-nucleotide phosphodiesterase act    | 1 | 1 | 0.046 | 50940 phosphodiesterase 11A                                                        |
| GO | renin secretion into blood stream          | 1 | 1 | 0.046 | 5125 proprotein convertase subtilisin/kexin type 5                                 |
| GO | negative regulation of cAMP-mediated s     | 1 | 1 | 0.046 | 5140 phosphodiesterase 3B, cGMP-inhibited                                          |
| GO | phytanoyl-CoA dioxygenase activity         | 1 | 1 | 0.046 | 5264 phytanoyl-CoA 2-hydroxylase                                                   |
| GO | bent DNA binding                           | 1 | 1 | 0.046 | 5303 protein (peptidylprolyl cis/trans isomerase) NIMA-interacting, 4 (parvulin)   |
| GO | preribosome                                | 1 | 1 | 0.046 | 5303 protein (peptidylprolyl cis/trans isomerase) NIMA-interacting, 4 (parvulin)   |
| GO | inhibition of phospholipase C activity in  | 1 | 1 | 0.046 | 5341 pleckstrin                                                                    |
| GO | negative regulation of inositol phosphat   | 1 | 1 | 0.046 | 5341 pleckstrin                                                                    |
| GO | positive regulation of inositol-polyphosp  | 1 | 1 | 0.046 | 5341 pleckstrin                                                                    |

|    |                                           |   |   |       |                                                                                  |
|----|-------------------------------------------|---|---|-------|----------------------------------------------------------------------------------|
| GO | protein secretion by platelet             | 1 | 1 | 0.046 | 5341 pleckstrin                                                                  |
| GO | regulation of cell diameter               | 1 | 1 | 0.046 | 5341 pleckstrin                                                                  |
| GO | epithelial tube formation                 | 1 | 1 | 0.046 | 5420 podocalyxin-like                                                            |
| GO | positive regulation of cell-cell adhesion | 1 | 1 | 0.046 | 5420 podocalyxin-like                                                            |
| GO | regulation of microvillus assembly        | 1 | 1 | 0.046 | 5420 podocalyxin-like                                                            |
| GO | positive regulation of mammary gland e    | 1 | 1 | 0.046 | 5469 mediator complex subunit 1                                                  |
| GO | positive regulation of mucus secretion    | 1 | 1 | 0.046 | 54843 synaptotagmin-like 2                                                       |
| GO | regulation of telomerase activity         | 1 | 1 | 0.046 | 54984 PIN2-interacting protein 1                                                 |
| GO | N-acetylglucosamine kinase activity       | 1 | 1 | 0.046 | 55577 N-acetylglucosamine kinase                                                 |
| GO | N-acetylmannosamine metabolic proces      | 1 | 1 | 0.046 | 55577 N-acetylglucosamine kinase                                                 |
| GO | negative regulation of activation-induce  | 1 | 1 | 0.046 | 57678 glycerol-3-phosphate acyltransferase, mitochondrial                        |
| GO | regulation of cytokine secretion          | 1 | 1 | 0.046 | 57678 glycerol-3-phosphate acyltransferase, mitochondrial                        |
| GO | induction of retinal programmed cell de   | 1 | 1 | 0.046 | 581 BCL2-associated X protein                                                    |
| GO | mitochondrial permeability transition p   | 1 | 1 | 0.046 | 581 BCL2-associated X protein                                                    |
| GO | release of matrix enzymes from mitoch     | 1 | 1 | 0.046 | 581 BCL2-associated X protein                                                    |
| GO | ethanolamine-phosphate cytidylyltransf    | 1 | 1 | 0.046 | 5833 phosphate cytidylyltransferase 2, ethanolamine                              |
| GO | smooth muscle contractile fiber           | 1 | 1 | 0.046 | 59 actin, alpha 2, smooth muscle, aorta                                          |
| GO | vascular smooth muscle contraction        | 1 | 1 | 0.046 | 59 actin, alpha 2, smooth muscle, aorta                                          |
| GO | cocaine metabolic process                 | 1 | 1 | 0.046 | 590 butyrylcholinesterase                                                        |
| GO | deoxynucleotide transmembrane transp      | 1 | 1 | 0.046 | 60386 solute carrier family 25 (mitochondrial thiamine pyrophosphate carrier), m |
| GO | deoxynucleotide transport                 | 1 | 1 | 0.046 | 60386 solute carrier family 25 (mitochondrial thiamine pyrophosphate carrier), m |
| GO | ribulose-phosphate 3-epimerase activity   | 1 | 1 | 0.046 | 6120 ribulose-5-phosphate-3-epimerase                                            |
| GO | inductive cell-cell signaling             | 1 | 1 | 0.046 | 6299 sal-like 1 (Drosophila)                                                     |
| GO | kidney epithelium development             | 1 | 1 | 0.046 | 6299 sal-like 1 (Drosophila)                                                     |
| GO | olfactory bulb mitral cell layer developn | 1 | 1 | 0.046 | 6299 sal-like 1 (Drosophila)                                                     |
| GO | ureteric bud invasion                     | 1 | 1 | 0.046 | 6299 sal-like 1 (Drosophila)                                                     |
| GO | chemokine-mediated signaling pathway      | 1 | 1 | 0.046 | 6347 chemokine (C-C motif) ligand 2                                              |
| GO | D-ribose metabolic process                | 1 | 1 | 0.046 | 64080 ribokinase                                                                 |
| GO | ribokinase activity                       | 1 | 1 | 0.046 | 64080 ribokinase                                                                 |
| GO | negative regulation of cell division      | 1 | 1 | 0.046 | 641 Bloom syndrome, RecQ helicase-like                                           |
| GO | Wnt receptor signaling pathway, planar    | 1 | 1 | 0.046 | 6422 secreted frizzled-related protein 1                                         |
| GO | negative regulation of systemic arterial  | 1 | 1 | 0.046 | 659 bone morphogenetic protein receptor, type II (serine/threonine kinase)       |
| GO | regulation of lung blood pressure         | 1 | 1 | 0.046 | 659 bone morphogenetic protein receptor, type II (serine/threonine kinase)       |
| GO | detection of mechanical stimulus involv   | 1 | 1 | 0.046 | 6657 SRY (sex determining region Y)-box 2                                        |
| GO | diencephalon morphogenesis                | 1 | 1 | 0.046 | 6657 SRY (sex determining region Y)-box 2                                        |
| GO | glial cell fate commitment                | 1 | 1 | 0.046 | 6657 SRY (sex determining region Y)-box 2                                        |

|    |                                             |   |   |       |                                                                                  |
|----|---------------------------------------------|---|---|-------|----------------------------------------------------------------------------------|
| GO | pigment biosynthetic process                | 1 | 1 | 0.046 | 6657 SRY (sex determining region Y)-box 2                                        |
| GO | endochondral bone morphogenesis             | 1 | 1 | 0.046 | 6662 SRY (sex determining region Y)-box 9                                        |
| GO | epithelial cell proliferation involved in p | 1 | 1 | 0.046 | 6662 SRY (sex determining region Y)-box 9                                        |
| GO | male germ-line sex determination            | 1 | 1 | 0.046 | 6662 SRY (sex determining region Y)-box 9                                        |
| GO | microtubule plus end                        | 1 | 1 | 0.046 | 667 dystonin                                                                     |
| GO | interferon-gamma-mediated signaling p       | 1 | 1 | 0.046 | 6672 SP100 nuclear antigen                                                       |
| GO | response to type I interferon               | 1 | 1 | 0.046 | 6672 SP100 nuclear antigen                                                       |
| GO | type I interferon-mediated signaling pat    | 1 | 1 | 0.046 | 6672 SP100 nuclear antigen                                                       |
| GO | negative regulation of centriole replicat   | 1 | 1 | 0.046 | 672 breast cancer 1, early onset                                                 |
| GO | histone mRNA metabolic process              | 1 | 1 | 0.046 | 6741 Sjogren syndrome antigen B (autoantigen La)                                 |
| GO | actomyosin, actin part                      | 1 | 1 | 0.046 | 70 actin, alpha, cardiac muscle 1                                                |
| GO | plasma membrane part                        | 1 | 1 | 0.046 | 7046 transforming growth factor, beta receptor 1                                 |
| GO | regulation of systemic arterial blood pre   | 1 | 1 | 0.046 | 7137 troponin I type 3 (cardiac)                                                 |
| GO | positive regulation of heart rate by epin   | 1 | 1 | 0.046 | 7168 tropomyosin 1 (alpha)                                                       |
| GO | deoxyribonucleoside monophosphate b         | 1 | 1 | 0.046 | 7298 thymidylate synthetase                                                      |
| GO | dTMP biosynthetic process                   | 1 | 1 | 0.046 | 7298 thymidylate synthetase                                                      |
| GO | dUMP metabolic process                      | 1 | 1 | 0.046 | 7298 thymidylate synthetase                                                      |
| GO | thymidylate synthase activity               | 1 | 1 | 0.046 | 7298 thymidylate synthetase                                                      |
| GO | uroporphyrinogen decarboxylase activit      | 1 | 1 | 0.046 | 7389 uroporphyrinogen decarboxylase                                              |
| GO | uroporphyrinogen III metabolic process      | 1 | 1 | 0.046 | 7389 uroporphyrinogen decarboxylase                                              |
| GO | cerebellar molecular layer development      | 1 | 1 | 0.046 | 773 calcium channel, voltage-dependent, P/Q type, alpha 1A subunit               |
| GO | cerebellum maturation                       | 1 | 1 | 0.046 | 773 calcium channel, voltage-dependent, P/Q type, alpha 1A subunit               |
| GO | negative regulation of hormone biosynt      | 1 | 1 | 0.046 | 773 calcium channel, voltage-dependent, P/Q type, alpha 1A subunit               |
| GO | rhythmic synaptic transmission              | 1 | 1 | 0.046 | 773 calcium channel, voltage-dependent, P/Q type, alpha 1A subunit               |
| GO | vestibular nucleus development              | 1 | 1 | 0.046 | 773 calcium channel, voltage-dependent, P/Q type, alpha 1A subunit               |
| GO | eosinophil chemotaxis                       | 1 | 1 | 0.046 | 7857 secretogranin II (chromogranin C)                                           |
| GO | fatty acid elongation                       | 1 | 1 | 0.046 | 79071 ELOVL family member 6, elongation of long chain fatty acids (FEN1/Elo2, SL |
| GO | agmatinase activity                         | 1 | 1 | 0.046 | 79814 agmatine ureohydrolase (agmatinase)                                        |
| GO | putrescine biosynthetic process             | 1 | 1 | 0.046 | 79814 agmatine ureohydrolase (agmatinase)                                        |
| GO | N-terminal peptidyl-L-cysteine N-palmit     | 1 | 1 | 0.046 | 79929 MAP6 domain containing 1                                                   |
| GO | nucleologenesis                             | 1 | 1 | 0.046 | 84172 polymerase (RNA) I polypeptide B, 128kDa                                   |
| GO | rRNA metabolic process                      | 1 | 1 | 0.046 | 84365 MKI67 (FHA domain) interacting nucleolar phosphoprotein                    |
| GO | RNA polymerase II transcription terminz     | 1 | 1 | 0.046 | 8458 transcription termination factor, RNA polymerase II                         |
| GO | polarized epithelial cell differentiation   | 1 | 1 | 0.046 | 8626 tumor protein p63                                                           |
| GO | squamous basal epithelial stem cell diffi   | 1 | 1 | 0.046 | 8626 tumor protein p63                                                           |
| GO | 1-pyrroline-5-carboxylate dehydrogenas      | 1 | 1 | 0.046 | 8659 aldehyde dehydrogenase 4 family, member A1                                  |

|    |                                                   |    |     |       |        |                                                                             |
|----|---------------------------------------------------|----|-----|-------|--------|-----------------------------------------------------------------------------|
| GO | tRNA (uracil) methyltransferase activity          | 1  | 1   | 0.046 | 91801  | alkB, alkylation repair homolog 8 (E. coli)                                 |
| GO | 25-hydroxycholesterol 7alpha-hydroxylase activity | 1  | 1   | 0.046 | 9420   | cytochrome P450, family 7, subfamily B, polypeptide 1                       |
| GO | metabotropic glutamate receptor binding           | 1  | 1   | 0.046 | 9455   | homer homolog 2 (Drosophila)                                                |
| GO | heparan sulfate 2-O-sulfotransferase activity     | 1  | 1   | 0.046 | 9653   | heparan sulfate 2-O-sulfotransferase 1                                      |
| GO | heparin metabolic process                         | 1  | 1   | 0.046 | 9653   | heparan sulfate 2-O-sulfotransferase 1                                      |
| GO | synaptic transmission                             | 13 | 167 | 0.048 | 10052  | gap junction protein, gamma 1, 45kDa                                        |
| GO | synaptic transmission                             | 13 | 167 | 0.048 | 1138   | cholinergic receptor, nicotinic, alpha 5                                    |
| GO | synaptic transmission                             | 13 | 167 | 0.048 | 200959 | gamma-aminobutyric acid (GABA) receptor, rho 3                              |
| GO | synaptic transmission                             | 13 | 167 | 0.048 | 2558   | gamma-aminobutyric acid (GABA) A receptor, alpha 5                          |
| GO | synaptic transmission                             | 13 | 167 | 0.048 | 2898   | glutamate receptor, ionotropic, kainate 2                                   |
| GO | synaptic transmission                             | 13 | 167 | 0.048 | 3751   | potassium voltage-gated channel, Shal-related subfamily, member 2           |
| GO | synaptic transmission                             | 13 | 167 | 0.048 | 3778   | potassium large conductance calcium-activated channel, subfamily M, alpha 1 |
| GO | synaptic transmission                             | 13 | 167 | 0.048 | 4287   | ataxin 3                                                                    |
| GO | synaptic transmission                             | 13 | 167 | 0.048 | 4884   | neuronal pentraxin I                                                        |
| GO | synaptic transmission                             | 13 | 167 | 0.048 | 56126  | protocadherin beta 10                                                       |
| GO | synaptic transmission                             | 13 | 167 | 0.048 | 56133  | protocadherin beta 2                                                        |
| GO | synaptic transmission                             | 13 | 167 | 0.048 | 56479  | potassium voltage-gated channel, KQT-like subfamily, member 5               |
| GO | synaptic transmission                             | 13 | 167 | 0.048 | 9568   | gamma-aminobutyric acid (GABA) B receptor, 2                                |
| GO | structural constituent of muscle                  | 5  | 43  | 0.048 | 4637   | myosin, light chain 6, alkali, smooth muscle and non-muscle                 |
| GO | structural constituent of muscle                  | 5  | 43  | 0.048 | 6525   | smoothelin                                                                  |
| GO | structural constituent of muscle                  | 5  | 43  | 0.048 | 7168   | tropomyosin 1 (alpha)                                                       |
| GO | structural constituent of muscle                  | 5  | 43  | 0.048 | 7171   | tropomyosin 4                                                               |
| GO | structural constituent of muscle                  | 5  | 43  | 0.048 | 9172   | myomesin (M-protein) 2, 165kDa                                              |
| GO | tRNA processing                                   | 6  | 57  | 0.048 | 10799  | ribonuclease P/MRP 40kDa subunit                                            |
| GO | tRNA processing                                   | 6  | 57  | 0.048 | 134637 | adenosine deaminase, tRNA-specific 2, TAD2 homolog (S. cerevisiae)          |
| GO | tRNA processing                                   | 6  | 57  | 0.048 | 150962 | pseudouridylate synthase 10                                                 |
| GO | tRNA processing                                   | 6  | 57  | 0.048 | 1787   | tRNA aspartic acid methyltransferase 1                                      |
| GO | tRNA processing                                   | 6  | 57  | 0.048 | 3028   | hydroxysteroid (17-beta) dehydrogenase 10                                   |
| GO | tRNA processing                                   | 6  | 57  | 0.048 | 345630 | fibrillarin-like 1                                                          |
| GO | neuron migration                                  | 6  | 57  | 0.048 | 2534   | FYN oncogene related to SRC, FGR, YES                                       |
| GO | neuron migration                                  | 6  | 57  | 0.048 | 266727 | MAM domain containing glycosylphosphatidylinositol anchor 1                 |
| GO | neuron migration                                  | 6  | 57  | 0.048 | 347733 | tubulin, beta 2B                                                            |
| GO | neuron migration                                  | 6  | 57  | 0.048 | 4897   | neuronal cell adhesion molecule                                             |
| GO | neuron migration                                  | 6  | 57  | 0.048 | 51473  | doublecortin domain containing 2                                            |
| GO | neuron migration                                  | 6  | 57  | 0.048 | 92737  | delta/notch-like EGF repeat containing                                      |
| GO | regulation of protein localization                | 3  | 18  | 0.048 | 1000   | cadherin 2, type 1, N-cadherin (neuronal)                                   |

|    |                                          |   |    |       |                                                                                 |
|----|------------------------------------------|---|----|-------|---------------------------------------------------------------------------------|
| GO | regulation of protein localization       | 3 | 18 | 0.048 | 7341 SMT3 suppressor of mif two 3 homolog 1 ( <i>S. cerevisiae</i> )            |
| GO | regulation of protein localization       | 3 | 18 | 0.048 | 9910 RAB GTPase activating protein 1-like                                       |
| GO | response to corticosterone stimulus      | 3 | 18 | 0.048 | 1026 cyclin-dependent kinase inhibitor 1A (p21, Cip1)                           |
| GO | response to corticosterone stimulus      | 3 | 18 | 0.048 | 2878 glutathione peroxidase 3 (plasma)                                          |
| GO | response to corticosterone stimulus      | 3 | 18 | 0.048 | 898 cyclin E1                                                                   |
| GO | response to inorganic substance          | 3 | 18 | 0.048 | 1136 cholinergic receptor, nicotinic, alpha 3                                   |
| GO | response to inorganic substance          | 3 | 18 | 0.048 | 2618 phosphoribosylglycinamide formyltransferase, phosphoribosylglycinamide     |
| GO | response to inorganic substance          | 3 | 18 | 0.048 | 7037 transferrin receptor (p90, CD71)                                           |
| GO | DNA helicase activity                    | 3 | 18 | 0.048 | 1161 excision repair cross-complementing rodent repair deficiency, complement   |
| GO | DNA helicase activity                    | 3 | 18 | 0.048 | 50485 SWI/SNF related, matrix associated, actin dependent regulator of chromati |
| GO | DNA helicase activity                    | 3 | 18 | 0.048 | 5965 RecQ protein-like (DNA helicase Q1-like)                                   |
| GO | beta-amyloid binding                     | 3 | 18 | 0.048 | 3028 hydroxysteroid (17-beta) dehydrogenase 10                                  |
| GO | beta-amyloid binding                     | 3 | 18 | 0.048 | 348 apolipoprotein E                                                            |
| GO | beta-amyloid binding                     | 3 | 18 | 0.048 | 590 butyrylcholinesterase                                                       |
| GO | beta-tubulin binding                     | 3 | 18 | 0.048 | 55207 ADP-ribosylation factor-like 8B                                           |
| GO | beta-tubulin binding                     | 3 | 18 | 0.048 | 6683 spastin                                                                    |
| GO | beta-tubulin binding                     | 3 | 18 | 0.048 | 8409 ubiquitously-expressed transcript                                          |
| GO | response to UV                           | 4 | 30 | 0.049 | 1026 cyclin-dependent kinase inhibitor 1A (p21, Cip1)                           |
| GO | response to UV                           | 4 | 30 | 0.049 | 1161 excision repair cross-complementing rodent repair deficiency, complement   |
| GO | response to UV                           | 4 | 30 | 0.049 | 1643 damage-specific DNA binding protein 2, 48kDa                               |
| GO | response to UV                           | 4 | 30 | 0.049 | 56852 RAD18 homolog ( <i>S. cerevisiae</i> )                                    |
| GO | response to arsenic                      | 2 | 8  | 0.05  | 1026 cyclin-dependent kinase inhibitor 1A (p21, Cip1)                           |
| GO | response to arsenic                      | 2 | 8  | 0.05  | 1543 cytochrome P450, family 1, subfamily A, polypeptide 1                      |
| GO | response to hyperoxia                    | 2 | 8  | 0.05  | 1026 cyclin-dependent kinase inhibitor 1A (p21, Cip1)                           |
| GO | response to hyperoxia                    | 2 | 8  | 0.05  | 1543 cytochrome P450, family 1, subfamily A, polypeptide 1                      |
| GO | nucleotide biosynthetic process          | 2 | 8  | 0.05  | 1841 deoxythymidylate kinase (thymidylate kinase)                               |
| GO | nucleotide biosynthetic process          | 2 | 8  | 0.05  | 7298 thymidylate synthetase                                                     |
| GO | determination of adult lifespan          | 2 | 8  | 0.05  | 29842 transcription factor CP2-like 1                                           |
| GO | determination of adult lifespan          | 2 | 8  | 0.05  | 4436 mutS homolog 2, colon cancer, nonpolyposis type 1 ( <i>E. coli</i> )       |
| GO | hemopoietic progenitor cell differentiat | 2 | 8  | 0.05  | 3624 inhibin, beta A                                                            |
| GO | hemopoietic progenitor cell differentiat | 2 | 8  | 0.05  | 5341 pleckstrin                                                                 |
| GO | nuclear localization sequence binding    | 2 | 8  | 0.05  | 3836 karyopherin alpha 1 (importin alpha 5)                                     |
| GO | nuclear localization sequence binding    | 2 | 8  | 0.05  | 3838 karyopherin alpha 2 (RAG cohort 1, importin alpha 1)                       |
| GO | mismatched DNA binding                   | 2 | 8  | 0.05  | 4436 mutS homolog 2, colon cancer, nonpolyposis type 1 ( <i>E. coli</i> )       |
| GO | mismatched DNA binding                   | 2 | 8  | 0.05  | 5378 PMS1 postmeiotic segregation increased 1 ( <i>S. cerevisiae</i> )          |
| GO | proline-rich region binding              | 2 | 8  | 0.05  | 4734 neural precursor cell expressed, developmentally down-regulated 4          |

|    |                                       |   |     |       |        |                                                                           |
|----|---------------------------------------|---|-----|-------|--------|---------------------------------------------------------------------------|
| GO | proline-rich region binding           | 2 | 8   | 0.05  | 5216   | profilin 1                                                                |
| GO | pharyngeal system development         | 2 | 8   | 0.05  | 6899   | T-box 1                                                                   |
| GO | pharyngeal system development         | 2 | 8   | 0.05  | 7046   | transforming growth factor, beta receptor 1                               |
| GO | positive regulation of MAPKKK cascade | 4 | 31  | 0.054 | 2149   | coagulation factor II (thrombin) receptor                                 |
| GO | positive regulation of MAPKKK cascade | 4 | 31  | 0.054 | 3589   | interleukin 11                                                            |
| GO | positive regulation of MAPKKK cascade | 4 | 31  | 0.054 | 3952   | leptin                                                                    |
| GO | positive regulation of MAPKKK cascade | 4 | 31  | 0.054 | 6657   | SRY (sex determining region Y)-box 2                                      |
| GO | heparin binding                       | 9 | 105 | 0.055 | 10457  | glycoprotein (transmembrane) nmb                                          |
| GO | heparin binding                       | 9 | 105 | 0.055 | 1289   | collagen, type V, alpha 1                                                 |
| GO | heparin binding                       | 9 | 105 | 0.055 | 143282 | fibroblast growth factor binding protein 3                                |
| GO | heparin binding                       | 9 | 105 | 0.055 | 26577  | procollagen C-endopeptidase enhancer 2                                    |
| GO | heparin binding                       | 9 | 105 | 0.055 | 348    | apolipoprotein E                                                          |
| GO | heparin binding                       | 9 | 105 | 0.055 | 3918   | laminin, gamma 2                                                          |
| GO | heparin binding                       | 9 | 105 | 0.055 | 5228   | placental growth factor                                                   |
| GO | heparin binding                       | 9 | 105 | 0.055 | 6347   | chemokine (C-C motif) ligand 2                                            |
| GO | heparin binding                       | 9 | 105 | 0.055 | 7058   | thrombospondin 2                                                          |
| GO | DNA metabolic process                 | 3 | 19  | 0.056 | 1775   | deoxyribonuclease I-like 2                                                |
| GO | DNA metabolic process                 | 3 | 19  | 0.056 | 3838   | karyopherin alpha 2 (RAG cohort 1, importin alpha 1)                      |
| GO | DNA metabolic process                 | 3 | 19  | 0.056 | 50485  | SWI/SNF related, matrix associated, actin dependent regulator of chromati |
| GO | nucleocytoplasmic transport           | 3 | 19  | 0.056 | 1984   | eukaryotic translation initiation factor 5A                               |
| GO | nucleocytoplasmic transport           | 3 | 19  | 0.056 | 4928   | nucleoporin 98kDa                                                         |
| GO | nucleocytoplasmic transport           | 3 | 19  | 0.056 | 8536   | calcium/calmodulin-dependent protein kinase I                             |
| GO | high-density lipoprotein particle     | 3 | 19  | 0.056 | 341    | apolipoprotein C-I                                                        |
| GO | high-density lipoprotein particle     | 3 | 19  | 0.056 | 348    | apolipoprotein E                                                          |
| GO | high-density lipoprotein particle     | 3 | 19  | 0.056 | 79135  | apolipoprotein O                                                          |
| GO | very-low-density lipoprotein particle | 3 | 19  | 0.056 | 341    | apolipoprotein C-I                                                        |
| GO | very-low-density lipoprotein particle | 3 | 19  | 0.056 | 348    | apolipoprotein E                                                          |
| GO | very-low-density lipoprotein particle | 3 | 19  | 0.056 | 79135  | apolipoprotein O                                                          |
| GO | response to amino acid stimulus       | 3 | 19  | 0.056 | 4436   | mutS homolog 2, colon cancer, nonpolyposis type 1 (E. coli)               |
| GO | response to amino acid stimulus       | 3 | 19  | 0.056 | 6347   | chemokine (C-C motif) ligand 2                                            |
| GO | response to amino acid stimulus       | 3 | 19  | 0.056 | 7078   | TIMP metalloproteinase inhibitor 3                                        |
| GO | neuron projection                     | 6 | 60  | 0.059 | 114757 | cytoglobin                                                                |
| GO | neuron projection                     | 6 | 60  | 0.059 | 3800   | kinesin family member 5C                                                  |
| GO | neuron projection                     | 6 | 60  | 0.059 | 4897   | neuronal cell adhesion molecule                                           |
| GO | neuron projection                     | 6 | 60  | 0.059 | 5494   | protein phosphatase, Mg <sup>2+</sup> /Mn <sup>2+</sup> dependent, 1A     |
| GO | neuron projection                     | 6 | 60  | 0.059 | 8997   | kalirin, RhoGEF kinase                                                    |

|    |                                           |    |     |       |        |                                                                                  |
|----|-------------------------------------------|----|-----|-------|--------|----------------------------------------------------------------------------------|
| GO | neuron projection                         | 6  | 60  | 0.059 | 9568   | gamma-aminobutyric acid (GABA) B receptor, 2                                     |
| GO | nuclear pore                              | 6  | 60  | 0.059 | 1984   | eukaryotic translation initiation factor 5A                                      |
| GO | nuclear pore                              | 6  | 60  | 0.059 | 3836   | karyopherin alpha 1 (importin alpha 5)                                           |
| GO | nuclear pore                              | 6  | 60  | 0.059 | 3838   | karyopherin alpha 2 (RAG cohort 1, importin alpha 1)                             |
| GO | nuclear pore                              | 6  | 60  | 0.059 | 4928   | nucleoporin 98kDa                                                                |
| GO | nuclear pore                              | 6  | 60  | 0.059 | 7341   | SMT3 suppressor of mif two 3 homolog 1 ( <i>S. cerevisiae</i> )                  |
| GO | nuclear pore                              | 6  | 60  | 0.059 | 9688   | nucleoporin 93kDa                                                                |
| GO | peptidyl-prolyl cis-trans isomerase activ | 4  | 32  | 0.059 | 10465  | peptidylprolyl isomerase H (cyclophilin H)                                       |
| GO | peptidyl-prolyl cis-trans isomerase activ | 4  | 32  | 0.059 | 2281   | FK506 binding protein 1B, 12.6 kDa                                               |
| GO | peptidyl-prolyl cis-trans isomerase activ | 4  | 32  | 0.059 | 51645  | peptidylprolyl isomerase (cyclophilin)-like 1                                    |
| GO | peptidyl-prolyl cis-trans isomerase activ | 4  | 32  | 0.059 | 5303   | protein (peptidylprolyl cis/trans isomerase) NIMA-interacting, 4 (parvulin)      |
| GO | manganese ion binding                     | 4  | 32  | 0.059 | 147699 | protein phosphatase, Mg <sup>2+</sup> /Mn <sup>2+</sup> dependent, 1N (putative) |
| GO | manganese ion binding                     | 4  | 32  | 0.059 | 2237   | flap structure-specific endonuclease 1                                           |
| GO | manganese ion binding                     | 4  | 32  | 0.059 | 5184   | peptidase D                                                                      |
| GO | manganese ion binding                     | 4  | 32  | 0.059 | 5494   | protein phosphatase, Mg <sup>2+</sup> /Mn <sup>2+</sup> dependent, 1A            |
| GO | sensory perception of sound               | 8  | 91  | 0.061 | 1301   | collagen, type XI, alpha 1                                                       |
| GO | sensory perception of sound               | 8  | 91  | 0.061 | 1687   | deafness, autosomal dominant 5                                                   |
| GO | sensory perception of sound               | 8  | 91  | 0.061 | 1690   | coagulation factor C homolog, cochlin ( <i>Limulus polyphemus</i> )              |
| GO | sensory perception of sound               | 8  | 91  | 0.061 | 26519  | translocase of inner mitochondrial membrane 10 homolog (yeast)                   |
| GO | sensory perception of sound               | 8  | 91  | 0.061 | 26521  | translocase of inner mitochondrial membrane 8 homolog B (yeast)                  |
| GO | sensory perception of sound               | 8  | 91  | 0.061 | 3778   | potassium large conductance calcium-activated channel, subfamily M, alph         |
| GO | sensory perception of sound               | 8  | 91  | 0.061 | 55084  | sine oculis binding protein homolog ( <i>Drosophila</i> )                        |
| GO | sensory perception of sound               | 8  | 91  | 0.061 | 7840   | Alstrom syndrome 1                                                               |
| GO | response to hypoxia                       | 11 | 140 | 0.062 | 1543   | cytochrome P450, family 1, subfamily A, polypeptide 1                            |
| GO | response to hypoxia                       | 11 | 140 | 0.062 | 2321   | fms-related tyrosine kinase 1 (vascular endothelial growth factor/vascular p     |
| GO | response to hypoxia                       | 11 | 140 | 0.062 | 23305  | acyl-CoA synthetase long-chain family member 6                                   |
| GO | response to hypoxia                       | 11 | 140 | 0.062 | 3778   | potassium large conductance calcium-activated channel, subfamily M, alph         |
| GO | response to hypoxia                       | 11 | 140 | 0.062 | 4763   | neurofibromin 1                                                                  |
| GO | response to hypoxia                       | 11 | 140 | 0.062 | 5228   | placental growth factor                                                          |
| GO | response to hypoxia                       | 11 | 140 | 0.062 | 5588   | protein kinase C, theta                                                          |
| GO | response to hypoxia                       | 11 | 140 | 0.062 | 6347   | chemokine (C-C motif) ligand 2                                                   |
| GO | response to hypoxia                       | 11 | 140 | 0.062 | 6546   | solute carrier family 8 (sodium/calcium exchanger), member 1                     |
| GO | response to hypoxia                       | 11 | 140 | 0.062 | 7037   | transferrin receptor (p90, CD71)                                                 |
| GO | response to hypoxia                       | 11 | 140 | 0.062 | 7046   | transforming growth factor, beta receptor 1                                      |
| GO | Rac GTPase activator activity             | 2  | 9   | 0.062 | 10395  | deleted in liver cancer 1                                                        |
| GO | Rac GTPase activator activity             | 2  | 9   | 0.062 | 9732   | dedicator of cytokinesis 4                                                       |



|    |                                              |   |   |       |        |                                                                              |
|----|----------------------------------------------|---|---|-------|--------|------------------------------------------------------------------------------|
| GO | retinal binding                              | 2 | 9 | 0.062 | 116362 | retinol binding protein 7, cellular                                          |
| GO | retinal binding                              | 2 | 9 | 0.062 | 5947   | retinol binding protein 1, cellular                                          |
| GO | female gonad development                     | 2 | 9 | 0.062 | 132625 | zinc finger protein 42 homolog (mouse)                                       |
| GO | female gonad development                     | 2 | 9 | 0.062 | 431707 | LIM homeobox 8                                                               |
| GO | skeletal muscle tissue regeneration          | 2 | 9 | 0.062 | 2027   | enolase 3 (beta, muscle)                                                     |
| GO | skeletal muscle tissue regeneration          | 2 | 9 | 0.062 | 5081   | paired box 7                                                                 |
| GO | spectrin                                     | 2 | 9 | 0.062 | 2037   | erythrocyte membrane protein band 4.1-like 2                                 |
| GO | spectrin                                     | 2 | 9 | 0.062 | 6711   | spectrin, beta, non-erythrocytic 1                                           |
| GO | aldehyde dehydrogenase (NAD) activity        | 2 | 9 | 0.062 | 220    | aldehyde dehydrogenase 1 family, member A3                                   |
| GO | aldehyde dehydrogenase (NAD) activity        | 2 | 9 | 0.062 | 8659   | aldehyde dehydrogenase 4 family, member A1                                   |
| GO | lamellipodium membrane                       | 2 | 9 | 0.062 | 26499  | pleckstrin 2                                                                 |
| GO | lamellipodium membrane                       | 2 | 9 | 0.062 | 84168  | anthrax toxin receptor 1                                                     |
| GO | regulation of smoothened signaling path      | 2 | 9 | 0.062 | 2736   | GLI family zinc finger 2                                                     |
| GO | regulation of smoothened signaling path      | 2 | 9 | 0.062 | 5015   | orthodenticle homeobox 2                                                     |
| GO | M band                                       | 2 | 9 | 0.062 | 287    | ankyrin 2, neuronal                                                          |
| GO | M band                                       | 2 | 9 | 0.062 | 6711   | spectrin, beta, non-erythrocytic 1                                           |
| GO | positive regulation of synaptic transmission | 2 | 9 | 0.062 | 2898   | glutamate receptor, ionotropic, kainate 2                                    |
| GO | positive regulation of synaptic transmission | 2 | 9 | 0.062 | 6347   | chemokine (C-C motif) ligand 2                                               |
| GO | GTP biosynthetic process                     | 2 | 9 | 0.062 | 29922  | non-metastatic cells 7, protein expressed in (nucleoside-diphosphate kinase) |
| GO | GTP biosynthetic process                     | 2 | 9 | 0.062 | 4830   | non-metastatic cells 1, protein (NM23A) expressed in                         |
| GO | nucleoside diphosphate kinase activity       | 2 | 9 | 0.062 | 29922  | non-metastatic cells 7, protein expressed in (nucleoside-diphosphate kinase) |
| GO | nucleoside diphosphate kinase activity       | 2 | 9 | 0.062 | 4830   | non-metastatic cells 1, protein (NM23A) expressed in                         |
| GO | UTP biosynthetic process                     | 2 | 9 | 0.062 | 29922  | non-metastatic cells 7, protein expressed in (nucleoside-diphosphate kinase) |
| GO | UTP biosynthetic process                     | 2 | 9 | 0.062 | 4830   | non-metastatic cells 1, protein (NM23A) expressed in                         |
| GO | phospholipid efflux                          | 2 | 9 | 0.062 | 341    | apolipoprotein C-I                                                           |
| GO | phospholipid efflux                          | 2 | 9 | 0.062 | 348    | apolipoprotein E                                                             |
| GO | muscle filament sliding                      | 2 | 9 | 0.062 | 4637   | myosin, light chain 6, alkali, smooth muscle and non-muscle                  |
| GO | muscle filament sliding                      | 2 | 9 | 0.062 | 7168   | tropomyosin 1 (alpha)                                                        |
| GO | smooth muscle tissue development             | 2 | 9 | 0.062 | 4763   | neurofibromin 1                                                              |
| GO | smooth muscle tissue development             | 2 | 9 | 0.062 | 8626   | tumor protein p63                                                            |
| GO | response to growth factor stimulus           | 2 | 9 | 0.062 | 5028   | purinergic receptor P2Y, G-protein coupled, 1                                |
| GO | response to growth factor stimulus           | 2 | 9 | 0.062 | 6657   | SRY (sex determining region Y)-box 2                                         |
| GO | ruffle organization                          | 2 | 9 | 0.062 | 5341   | pleckstrin                                                                   |
| GO | ruffle organization                          | 2 | 9 | 0.062 | 7168   | tropomyosin 1 (alpha)                                                        |
| GO | DNA damage response, signal transduction     | 2 | 9 | 0.062 | 6672   | SP100 nuclear antigen                                                        |
| GO | DNA damage response, signal transduction     | 2 | 9 | 0.062 | 672    | breast cancer 1, early onset                                                 |

|    |                                           |    |     |       |                                                                                |
|----|-------------------------------------------|----|-----|-------|--------------------------------------------------------------------------------|
| GO | positive regulation of neuron apoptosis   | 3  | 20  | 0.063 | 2045 EPH receptor A7                                                           |
| GO | positive regulation of neuron apoptosis   | 3  | 20  | 0.063 | 4763 neurofibromin 1                                                           |
| GO | positive regulation of neuron apoptosis   | 3  | 20  | 0.063 | 581 BCL2-associated X protein                                                  |
| GO | adult walking behavior                    | 3  | 20  | 0.063 | 27429 HtrA serine peptidase 2                                                  |
| GO | adult walking behavior                    | 3  | 20  | 0.063 | 3778 potassium large conductance calcium-activated channel, subfamily M, alpha |
| GO | adult walking behavior                    | 3  | 20  | 0.063 | 773 calcium channel, voltage-dependent, P/Q type, alpha 1A subunit             |
| GO | response to organic cyclic substance      | 8  | 92  | 0.064 | 1026 cyclin-dependent kinase inhibitor 1A (p21, Cip1)                          |
| GO | response to organic cyclic substance      | 8  | 92  | 0.064 | 1543 cytochrome P450, family 1, subfamily A, polypeptide 1                     |
| GO | response to organic cyclic substance      | 8  | 92  | 0.064 | 2878 glutathione peroxidase 3 (plasma)                                         |
| GO | response to organic cyclic substance      | 8  | 92  | 0.064 | 4436 mutS homolog 2, colon cancer, nonpolyposis type 1 (E. coli)               |
| GO | response to organic cyclic substance      | 8  | 92  | 0.064 | 5021 oxytocin receptor                                                         |
| GO | response to organic cyclic substance      | 8  | 92  | 0.064 | 5588 protein kinase C, theta                                                   |
| GO | response to organic cyclic substance      | 8  | 92  | 0.064 | 7046 transforming growth factor, beta receptor 1                               |
| GO | response to organic cyclic substance      | 8  | 92  | 0.064 | 7078 TIMP metalloproteinase inhibitor 3                                        |
| GO | elevation of cytosolic calcium ion conce  | 8  | 92  | 0.064 | 10672 guanine nucleotide binding protein (G protein), alpha 13                 |
| GO | elevation of cytosolic calcium ion conce  | 8  | 92  | 0.064 | 2150 coagulation factor II (thrombin) receptor-like 1                          |
| GO | elevation of cytosolic calcium ion conce  | 8  | 92  | 0.064 | 5021 oxytocin receptor                                                         |
| GO | elevation of cytosolic calcium ion conce  | 8  | 92  | 0.064 | 5028 purinergic receptor P2Y, G-protein coupled, 1                             |
| GO | elevation of cytosolic calcium ion conce  | 8  | 92  | 0.064 | 60675 prokineticin 2                                                           |
| GO | elevation of cytosolic calcium ion conce  | 8  | 92  | 0.064 | 6546 solute carrier family 8 (sodium/calcium exchanger), member 1              |
| GO | elevation of cytosolic calcium ion conce  | 8  | 92  | 0.064 | 729230 chemokine (C-C motif) receptor 2                                        |
| GO | elevation of cytosolic calcium ion conce  | 8  | 92  | 0.064 | 773 calcium channel, voltage-dependent, P/Q type, alpha 1A subunit             |
| GO | negative regulation of transcription fror | 16 | 227 | 0.064 | 1045 caudal type homeobox 2                                                    |
| GO | negative regulation of transcription fror | 16 | 227 | 0.064 | 11142 protein kinase (cAMP-dependent, catalytic) inhibitor gamma               |
| GO | negative regulation of transcription fror | 16 | 227 | 0.064 | 11278 Kruppel-like factor 12                                                   |
| GO | negative regulation of transcription fror | 16 | 227 | 0.064 | 1746 distal-less homeobox 2                                                    |
| GO | negative regulation of transcription fror | 16 | 227 | 0.064 | 1788 DNA (cytosine-5-)-methyltransferase 3 alpha                               |
| GO | negative regulation of transcription fror | 16 | 227 | 0.064 | 2736 GLI family zinc finger 2                                                  |
| GO | negative regulation of transcription fror | 16 | 227 | 0.064 | 29842 transcription factor CP2-like 1                                          |
| GO | negative regulation of transcription fror | 16 | 227 | 0.064 | 29995 LIM and cysteine-rich domains 1                                          |
| GO | negative regulation of transcription fror | 16 | 227 | 0.064 | 3224 homeobox C8                                                               |
| GO | negative regulation of transcription fror | 16 | 227 | 0.064 | 5569 protein kinase (cAMP-dependent, catalytic) inhibitor alpha                |
| GO | negative regulation of transcription fror | 16 | 227 | 0.064 | 6299 sal-like 1 (Drosophila)                                                   |
| GO | negative regulation of transcription fror | 16 | 227 | 0.064 | 6591 snail homolog 2 (Drosophila)                                              |
| GO | negative regulation of transcription fror | 16 | 227 | 0.064 | 6657 SRY (sex determining region Y)-box 2                                      |
| GO | negative regulation of transcription fror | 16 | 227 | 0.064 | 6672 SP100 nuclear antigen                                                     |

|    |                                           |    |      |       |                                                                                  |
|----|-------------------------------------------|----|------|-------|----------------------------------------------------------------------------------|
| GO | negative regulation of transcription fror | 16 | 227  | 0.064 | 7490 Wilms tumor 1                                                               |
| GO | negative regulation of transcription fror | 16 | 227  | 0.064 | 8626 tumor protein p63                                                           |
| GO | phosphoinositide-mediated signaling       | 4  | 33   | 0.065 | 1164 CDC28 protein kinase regulatory subunit 2                                   |
| GO | phosphoinositide-mediated signaling       | 4  | 33   | 0.065 | 2237 flap structure-specific endonuclease 1                                      |
| GO | phosphoinositide-mediated signaling       | 4  | 33   | 0.065 | 7298 thymidylate synthetase                                                      |
| GO | phosphoinositide-mediated signaling       | 4  | 33   | 0.065 | 767 carbonic anhydrase VIII                                                      |
| GO | apical plasma membrane                    | 12 | 159  | 0.067 | 2151 coagulation factor II (thrombin) receptor-like 2                            |
| GO | apical plasma membrane                    | 12 | 159  | 0.067 | 287 ankyrin 2, neuronal                                                          |
| GO | apical plasma membrane                    | 12 | 159  | 0.067 | 309 annexin A6                                                                   |
| GO | apical plasma membrane                    | 12 | 159  | 0.067 | 3778 potassium large conductance calcium-activated channel, subfamily M, alph    |
| GO | apical plasma membrane                    | 12 | 159  | 0.067 | 5021 oxytocin receptor                                                           |
| GO | apical plasma membrane                    | 12 | 159  | 0.067 | 5028 purinergic receptor P2Y, G-protein coupled, 1                               |
| GO | apical plasma membrane                    | 12 | 159  | 0.067 | 5031 pyrimidinergic receptor P2Y, G-protein coupled, 6                           |
| GO | apical plasma membrane                    | 12 | 159  | 0.067 | 5420 podocalyxin-like                                                            |
| GO | apical plasma membrane                    | 12 | 159  | 0.067 | 7010 TEK tyrosine kinase, endothelial                                            |
| GO | apical plasma membrane                    | 12 | 159  | 0.067 | 7046 transforming growth factor, beta receptor 1                                 |
| GO | apical plasma membrane                    | 12 | 159  | 0.067 | 8777 multiple PDZ domain protein                                                 |
| GO | apical plasma membrane                    | 12 | 159  | 0.067 | 9497 solute carrier family 4, sodium bicarbonate cotransporter, member 7         |
| GO | negative regulation of signal transductic | 5  | 48   | 0.071 | 409 arrestin, beta 2                                                             |
| GO | negative regulation of signal transductic | 5  | 48   | 0.071 | 55003 PAK1 interacting protein 1                                                 |
| GO | negative regulation of signal transductic | 5  | 48   | 0.071 | 6000 regulator of G-protein signaling 7                                          |
| GO | negative regulation of signal transductic | 5  | 48   | 0.071 | 8490 regulator of G-protein signaling 5                                          |
| GO | negative regulation of signal transductic | 5  | 48   | 0.071 | 8835 suppressor of cytokine signaling 2                                          |
| GO | collagen binding                          | 4  | 34   | 0.071 | 22801 integrin, alpha 11                                                         |
| GO | collagen binding                          | 4  | 34   | 0.071 | 4060 lumican                                                                     |
| GO | collagen binding                          | 4  | 34   | 0.071 | 4318 matrix metalloproteinase 9 (gelatinase B, 92kDa gelatinase, 92kDa type IV c |
| GO | collagen binding                          | 4  | 34   | 0.071 | 84168 anthrax toxin receptor 1                                                   |
| GO | response to retinoic acid                 | 4  | 34   | 0.071 | 54332 ganglioside-induced differentiation-associated protein 1                   |
| GO | response to retinoic acid                 | 4  | 34   | 0.071 | 6657 SRY (sex determining region Y)-box 2                                        |
| GO | response to retinoic acid                 | 4  | 34   | 0.071 | 6672 SP100 nuclear antigen                                                       |
| GO | response to retinoic acid                 | 4  | 34   | 0.071 | 7037 transferrin receptor (p90, CD71)                                            |
| GO | ATP binding                               | 78 | 1426 | 0.073 | 10000 v-akt murine thymoma viral oncogene homolog 3 (protein kinase B, gamma     |
| GO | ATP binding                               | 78 | 1426 | 0.073 | 10051 structural maintenance of chromosomes 4                                    |
| GO | ATP binding                               | 78 | 1426 | 0.073 | 10056 phenylalanyl-tRNA synthetase, beta subunit                                 |
| GO | ATP binding                               | 78 | 1426 | 0.073 | 10096 ARP3 actin-related protein 3 homolog (yeast)                               |
| GO | ATP binding                               | 78 | 1426 | 0.073 | 10097 ARP2 actin-related protein 2 homolog (yeast)                               |

|    |             |    |      |       |        |                                                                              |
|----|-------------|----|------|-------|--------|------------------------------------------------------------------------------|
| GO | ATP binding | 78 | 1426 | 0.073 | 10212  | DEAD (Asp-Glu-Ala-Asp) box polypeptide 39                                    |
| GO | ATP binding | 78 | 1426 | 0.073 | 10808  | heat shock 105kDa/110kDa protein 1                                           |
| GO | ATP binding | 78 | 1426 | 0.073 | 11056  | DEAD (Asp-Glu-Ala-Asp) box polypeptide 52                                    |
| GO | ATP binding | 78 | 1426 | 0.073 | 132158 | glycerate kinase                                                             |
| GO | ATP binding | 78 | 1426 | 0.073 | 140739 | ubiquitin-conjugating enzyme E2F (putative)                                  |
| GO | ATP binding | 78 | 1426 | 0.073 | 1503   | CTP synthase                                                                 |
| GO | ATP binding | 78 | 1426 | 0.073 | 1716   | deoxyguanosine kinase                                                        |
| GO | ATP binding | 78 | 1426 | 0.073 | 1763   | DNA replication helicase 2 homolog (yeast)                                   |
| GO | ATP binding | 78 | 1426 | 0.073 | 1841   | deoxythymidylate kinase (thymidylate kinase)                                 |
| GO | ATP binding | 78 | 1426 | 0.073 | 203    | adenylate kinase 1                                                           |
| GO | ATP binding | 78 | 1426 | 0.073 | 2045   | EPH receptor A7                                                              |
| GO | ATP binding | 78 | 1426 | 0.073 | 2242   | feline sarcoma oncogene                                                      |
| GO | ATP binding | 78 | 1426 | 0.073 | 2264   | fibroblast growth factor receptor 4                                          |
| GO | ATP binding | 78 | 1426 | 0.073 | 22868  | FAST kinase domains 2                                                        |
| GO | ATP binding | 78 | 1426 | 0.073 | 23057  | nicotinamide nucleotide adenylyltransferase 2                                |
| GO | ATP binding | 78 | 1426 | 0.073 | 2321   | fms-related tyrosine kinase 1 (vascular endothelial growth factor/vascular p |
| GO | ATP binding | 78 | 1426 | 0.073 | 23305  | acyl-CoA synthetase long-chain family member 6                               |
| GO | ATP binding | 78 | 1426 | 0.073 | 2534   | FYN oncogene related to SRC, FGR, YES                                        |
| GO | ATP binding | 78 | 1426 | 0.073 | 26154  | ATP-binding cassette, sub-family A (ABC1), member 12                         |
| GO | ATP binding | 78 | 1426 | 0.073 | 2618   | phosphoribosylglycinamide formyltransferase, phosphoribosylglycinamide       |
| GO | ATP binding | 78 | 1426 | 0.073 | 27330  | ribosomal protein S6 kinase, 90kDa, polypeptide 6                            |
| GO | ATP binding | 78 | 1426 | 0.073 | 283455 | kinase suppressor of ras 2                                                   |
| GO | ATP binding | 78 | 1426 | 0.073 | 29922  | non-metastatic cells 7, protein expressed in (nucleoside-diphosphate kinase) |
| GO | ATP binding | 78 | 1426 | 0.073 | 3336   | heat shock 10kDa protein 1 (chaperonin 10)                                   |
| GO | ATP binding | 78 | 1426 | 0.073 | 340273 | ATP-binding cassette, sub-family B (MDR/TAP), member 5                       |
| GO | ATP binding | 78 | 1426 | 0.073 | 3797   | kinesin family member 3C                                                     |
| GO | ATP binding | 78 | 1426 | 0.073 | 3800   | kinesin family member 5C                                                     |
| GO | ATP binding | 78 | 1426 | 0.073 | 3932   | lymphocyte-specific protein tyrosine kinase                                  |
| GO | ATP binding | 78 | 1426 | 0.073 | 4171   | minichromosome maintenance complex component 2                               |
| GO | ATP binding | 78 | 1426 | 0.073 | 4292   | mutL homolog 1, colon cancer, nonpolyposis type 2 (E. coli)                  |
| GO | ATP binding | 78 | 1426 | 0.073 | 4430   | myosin IB                                                                    |
| GO | ATP binding | 78 | 1426 | 0.073 | 4436   | mutS homolog 2, colon cancer, nonpolyposis type 1 (E. coli)                  |
| GO | ATP binding | 78 | 1426 | 0.073 | 4651   | myosin X                                                                     |
| GO | ATP binding | 78 | 1426 | 0.073 | 479    | ATPase, H+/K+ transporting, nongastric, alpha polypeptide                    |
| GO | ATP binding | 78 | 1426 | 0.073 | 4830   | non-metastatic cells 1, protein (NM23A) expressed in                         |
| GO | ATP binding | 78 | 1426 | 0.073 | 5000   | origin recognition complex, subunit 4-like (yeast)                           |

|    |             |    |      |       |                                                                                 |
|----|-------------|----|------|-------|---------------------------------------------------------------------------------|
| GO | ATP binding | 78 | 1426 | 0.073 | 5026 purinergic receptor P2X, ligand-gated ion channel, 5                       |
| GO | ATP binding | 78 | 1426 | 0.073 | 5028 purinergic receptor P2Y, G-protein coupled, 1                              |
| GO | ATP binding | 78 | 1426 | 0.073 | 50485 SWI/SNF related, matrix associated, actin dependent regulator of chromati |
| GO | ATP binding | 78 | 1426 | 0.073 | 5378 PMS1 postmeiotic segregation increased 1 ( <i>S. cerevisiae</i> )          |
| GO | ATP binding | 78 | 1426 | 0.073 | 54822 transient receptor potential cation channel, subfamily M, member 7        |
| GO | ATP binding | 78 | 1426 | 0.073 | 55137 fidgetin                                                                  |
| GO | ATP binding | 78 | 1426 | 0.073 | 55577 N-acetylglucosamine kinase                                                |
| GO | ATP binding | 78 | 1426 | 0.073 | 558 AXL receptor tyrosine kinase                                                |
| GO | ATP binding | 78 | 1426 | 0.073 | 5588 protein kinase C, theta                                                    |
| GO | ATP binding | 78 | 1426 | 0.073 | 5702 proteasome (prosome, macropain) 26S subunit, ATPase, 3                     |
| GO | ATP binding | 78 | 1426 | 0.073 | 57144 p21 protein (Cdc42/Rac)-activated kinase 7                                |
| GO | ATP binding | 78 | 1426 | 0.073 | 5754 PTK7 protein tyrosine kinase 7                                             |
| GO | ATP binding | 78 | 1426 | 0.073 | 5889 RAD51 homolog C ( <i>S. cerevisiae</i> )                                   |
| GO | ATP binding | 78 | 1426 | 0.073 | 59 actin, alpha 2, smooth muscle, aorta                                         |
| GO | ATP binding | 78 | 1426 | 0.073 | 5965 RecQ protein-like (DNA helicase Q1-like)                                   |
| GO | ATP binding | 78 | 1426 | 0.073 | 64080 ribokinase                                                                |
| GO | ATP binding | 78 | 1426 | 0.073 | 641 Bloom syndrome, RecQ helicase-like                                          |
| GO | ATP binding | 78 | 1426 | 0.073 | 659 bone morphogenetic protein receptor, type II (serine/threonine kinase)      |
| GO | ATP binding | 78 | 1426 | 0.073 | 6683 spastin                                                                    |
| GO | ATP binding | 78 | 1426 | 0.073 | 6833 ATP-binding cassette, sub-family C (CFTR/MRP), member 8                    |
| GO | ATP binding | 78 | 1426 | 0.073 | 70 actin, alpha, cardiac muscle 1                                               |
| GO | ATP binding | 78 | 1426 | 0.073 | 7010 TEK tyrosine kinase, endothelial                                           |
| GO | ATP binding | 78 | 1426 | 0.073 | 7046 transforming growth factor, beta receptor 1                                |
| GO | ATP binding | 78 | 1426 | 0.073 | 7324 ubiquitin-conjugating enzyme E2E 1 (UBC4/5 homolog, yeast)                 |
| GO | ATP binding | 78 | 1426 | 0.073 | 79646 pantothenate kinase 3                                                     |
| GO | ATP binding | 78 | 1426 | 0.073 | 79677 structural maintenance of chromosomes 6                                   |
| GO | ATP binding | 78 | 1426 | 0.073 | 79710 MORC family CW-type zinc finger 4                                         |
| GO | ATP binding | 78 | 1426 | 0.073 | 84083 zinc finger, RAN-binding domain containing 3                              |
| GO | ATP binding | 78 | 1426 | 0.073 | 84319 chromosome 3 open reading frame 26                                        |
| GO | ATP binding | 78 | 1426 | 0.073 | 8458 transcription termination factor, RNA polymerase II                        |
| GO | ATP binding | 78 | 1426 | 0.073 | 8536 calcium/calmodulin-dependent protein kinase I                              |
| GO | ATP binding | 78 | 1426 | 0.073 | 89797 neuron navigator 2                                                        |
| GO | ATP binding | 78 | 1426 | 0.073 | 8997 kalirin, RhoGEF kinase                                                     |
| GO | ATP binding | 78 | 1426 | 0.073 | 9262 serine/threonine kinase 17b                                                |
| GO | ATP binding | 78 | 1426 | 0.073 | 9448 mitogen-activated protein kinase kinase kinase kinase 4                    |
| GO | ATP binding | 78 | 1426 | 0.073 | 953 ectonucleoside triphosphate diphosphohydrolase 1                            |

|    |                                           |    |      |       |        |                                                                           |
|----|-------------------------------------------|----|------|-------|--------|---------------------------------------------------------------------------|
| GO | ATP binding                               | 78 | 1426 | 0.073 | 9833   | maternal embryonic leucine zipper kinase                                  |
| GO | Ras GTPase activator activity             | 2  | 10   | 0.076 | 10788  | IQ motif containing GTPase activating protein 2                           |
| GO | Ras GTPase activator activity             | 2  | 10   | 0.076 | 4763   | neurofibromin 1                                                           |
| GO | substrate adhesion-dependent cell spre    | 2  | 10   | 0.076 | 11149  | blood vessel epicardial substance                                         |
| GO | substrate adhesion-dependent cell spre    | 2  | 10   | 0.076 | 84168  | anthrax toxin receptor 1                                                  |
| GO | NAD binding                               | 2  | 10   | 0.076 | 220    | aldehyde dehydrogenase 1 family, member A3                                |
| GO | NAD binding                               | 2  | 10   | 0.076 | 3248   | hydroxyprostaglandin dehydrogenase 15-(NAD)                               |
| GO | general transcriptional repressor activit | 2  | 10   | 0.076 | 29842  | transcription factor CP2-like 1                                           |
| GO | general transcriptional repressor activit | 2  | 10   | 0.076 | 6672   | SP100 nuclear antigen                                                     |
| GO | limb morphogenesis                        | 2  | 10   | 0.076 | 344191 | even-skipped homeobox 2                                                   |
| GO | limb morphogenesis                        | 2  | 10   | 0.076 | 5125   | proprotein convertase subtilisin/kexin type 5                             |
| GO | receptor internalization                  | 2  | 10   | 0.076 | 409    | arrestin, beta 2                                                          |
| GO | receptor internalization                  | 2  | 10   | 0.076 | 4734   | neural precursor cell expressed, developmentally down-regulated 4         |
| GO | isotype switching                         | 2  | 10   | 0.076 | 4292   | mutL homolog 1, colon cancer, nonpolyposis type 2 (E. coli)               |
| GO | isotype switching                         | 2  | 10   | 0.076 | 4436   | mutS homolog 2, colon cancer, nonpolyposis type 1 (E. coli)               |
| GO | prefoldin complex                         | 2  | 10   | 0.076 | 5203   | prefoldin subunit 4                                                       |
| GO | prefoldin complex                         | 2  | 10   | 0.076 | 8409   | ubiquitously-expressed transcript                                         |
| GO | ribosomal large subunit biogenesis        | 2  | 10   | 0.076 | 55759  | WD repeat domain 12                                                       |
| GO | ribosomal large subunit biogenesis        | 2  | 10   | 0.076 | 6154   | ribosomal protein L26                                                     |
| GO | vascular endothelial growth factor recep  | 2  | 10   | 0.076 | 6347   | chemokine (C-C motif) ligand 2                                            |
| GO | vascular endothelial growth factor recep  | 2  | 10   | 0.076 | 659    | bone morphogenetic protein receptor, type II (serine/threonine kinase)    |
| GO | G2/M transition DNA damage checkpoir      | 2  | 10   | 0.076 | 641    | Bloom syndrome, RecQ helicase-like                                        |
| GO | G2/M transition DNA damage checkpoir      | 2  | 10   | 0.076 | 672    | breast cancer 1, early onset                                              |
| GO | acetylglucosaminyltransferase activity    | 2  | 10   | 0.076 | 64131  | xylosyltransferase I                                                      |
| GO | acetylglucosaminyltransferase activity    | 2  | 10   | 0.076 | 9215   | like-glycosyltransferase                                                  |
| GO | caveola                                   | 5  | 49   | 0.076 | 10395  | deleted in liver cancer 1                                                 |
| GO | caveola                                   | 5  | 49   | 0.076 | 2149   | coagulation factor II (thrombin) receptor                                 |
| GO | caveola                                   | 5  | 49   | 0.076 | 3778   | potassium large conductance calcium-activated channel, subfamily M, alpha |
| GO | caveola                                   | 5  | 49   | 0.076 | 6546   | solute carrier family 8 (sodium/calcium exchanger), member 1              |
| GO | caveola                                   | 5  | 49   | 0.076 | 659    | bone morphogenetic protein receptor, type II (serine/threonine kinase)    |
| GO | calcium ion binding                       | 36 | 605  | 0.077 | 1000   | cadherin 2, type 1, N-cadherin (neuronal)                                 |
| GO | calcium ion binding                       | 36 | 605  | 0.077 | 1002   | cadherin 4, type 1, R-cadherin (retinal)                                  |
| GO | calcium ion binding                       | 36 | 605  | 0.077 | 1008   | cadherin 10, type 2 (T2-cadherin)                                         |
| GO | calcium ion binding                       | 36 | 605  | 0.077 | 1047   | calmegin                                                                  |
| GO | calcium ion binding                       | 36 | 605  | 0.077 | 10893  | matrix metalloproteinase 24 (membrane-inserted)                           |
| GO | calcium ion binding                       | 36 | 605  | 0.077 | 120114 | FAT tumor suppressor homolog 3 (Drosophila)                               |

|    |                                        |    |     |       |        |                                                                           |
|----|----------------------------------------|----|-----|-------|--------|---------------------------------------------------------------------------|
| GO | calcium ion binding                    | 36 | 605 | 0.077 | 162494 | rhomboïd, veinlet-like 3 (Drosophila)                                     |
| GO | calcium ion binding                    | 36 | 605 | 0.077 | 1775   | deoxyribonuclease I-like 2                                                |
| GO | calcium ion binding                    | 36 | 605 | 0.077 | 182    | jagged 1 (Alagille syndrome)                                              |
| GO | calcium ion binding                    | 36 | 605 | 0.077 | 1830   | desmoglein 3 (pemphigus vulgaris antigen)                                 |
| GO | calcium ion binding                    | 36 | 605 | 0.077 | 25780  | RAS guanyl releasing protein 3 (calcium and DAG-regulated)                |
| GO | calcium ion binding                    | 36 | 605 | 0.077 | 27445  | piccolo (presynaptic cytomatrix protein)                                  |
| GO | calcium ion binding                    | 36 | 605 | 0.077 | 309    | annexin A6                                                                |
| GO | calcium ion binding                    | 36 | 605 | 0.077 | 3936   | lymphocyte cytosolic protein 1 (L-plastin)                                |
| GO | calcium ion binding                    | 36 | 605 | 0.077 | 4052   | latent transforming growth factor beta binding protein 1                  |
| GO | calcium ion binding                    | 36 | 605 | 0.077 | 4312   | matrix metalloproteinase 1 (interstitial collagenase)                     |
| GO | calcium ion binding                    | 36 | 605 | 0.077 | 4319   | matrix metalloproteinase 10 (stromelysin 2)                               |
| GO | calcium ion binding                    | 36 | 605 | 0.077 | 4637   | myosin, light chain 6, alkali, smooth muscle and non-muscle               |
| GO | calcium ion binding                    | 36 | 605 | 0.077 | 5101   | protocadherin 9                                                           |
| GO | calcium ion binding                    | 36 | 605 | 0.077 | 55012  | protein phosphatase 2 (formerly 2A), regulatory subunit B'', gamma        |
| GO | calcium ion binding                    | 36 | 605 | 0.077 | 56104  | protocadherin gamma subfamily B, 1                                        |
| GO | calcium ion binding                    | 36 | 605 | 0.077 | 56126  | protocadherin beta 10                                                     |
| GO | calcium ion binding                    | 36 | 605 | 0.077 | 56133  | protocadherin beta 2                                                      |
| GO | calcium ion binding                    | 36 | 605 | 0.077 | 5624   | protein C (inactivator of coagulation factors Va and VIIIa)               |
| GO | calcium ion binding                    | 36 | 605 | 0.077 | 57333  | reticulocalbin 3, EF-hand calcium binding domain                          |
| GO | calcium ion binding                    | 36 | 605 | 0.077 | 57575  | protocadherin 10                                                          |
| GO | calcium ion binding                    | 36 | 605 | 0.077 | 6442   | sarcoglycan, alpha (50kDa dystrophin-associated glycoprotein)             |
| GO | calcium ion binding                    | 36 | 605 | 0.077 | 6586   | slit homolog 3 (Drosophila)                                               |
| GO | calcium ion binding                    | 36 | 605 | 0.077 | 667    | dystonin                                                                  |
| GO | calcium ion binding                    | 36 | 605 | 0.077 | 6695   | sparc/osteonectin, cwcv and kazal-like domains proteoglycan (testican) 1  |
| GO | calcium ion binding                    | 36 | 605 | 0.077 | 7058   | thrombospondin 2                                                          |
| GO | calcium ion binding                    | 36 | 605 | 0.077 | 7171   | tropomyosin 4                                                             |
| GO | calcium ion binding                    | 36 | 605 | 0.077 | 84206  | mex-3 homolog B (C. elegans)                                              |
| GO | calcium ion binding                    | 36 | 605 | 0.077 | 8604   | solute carrier family 25 (mitochondrial carrier, Aralar), member 12       |
| GO | calcium ion binding                    | 36 | 605 | 0.077 | 90141  | chromosome 14 open reading frame 143                                      |
| GO | calcium ion binding                    | 36 | 605 | 0.077 | 92737  | delta/notch-like EGF repeat containing                                    |
| GO | circadian rhythm                       | 4  | 35  | 0.078 | 3778   | potassium large conductance calcium-activated channel, subfamily M, alpha |
| GO | circadian rhythm                       | 4  | 35  | 0.078 | 406    | aryl hydrocarbon receptor nuclear translocator-like                       |
| GO | circadian rhythm                       | 4  | 35  | 0.078 | 60675  | prokineticin 2                                                            |
| GO | circadian rhythm                       | 4  | 35  | 0.078 | 9420   | cytochrome P450, family 7, subfamily B, polypeptide 1                     |
| GO | calcium-independent cell-cell adhesion | 3  | 22  | 0.08  | 23562  | claudin 14                                                                |
| GO | calcium-independent cell-cell adhesion | 3  | 22  | 0.08  | 23705  | cell adhesion molecule 1                                                  |

|    |                                        |    |     |       |        |                                                                        |
|----|----------------------------------------|----|-----|-------|--------|------------------------------------------------------------------------|
| GO | calcium-independent cell-cell adhesion | 3  | 22  | 0.08  | 9076   | claudin 1                                                              |
| GO | eating behavior                        | 3  | 22  | 0.08  | 3952   | leptin                                                                 |
| GO | eating behavior                        | 3  | 22  | 0.08  | 5021   | oxytocin receptor                                                      |
| GO | eating behavior                        | 3  | 22  | 0.08  | 5028   | purinergic receptor P2Y, G-protein coupled, 1                          |
| GO | protein heterodimerization activity    | 14 | 199 | 0.081 | 10051  | structural maintenance of chromosomes 4                                |
| GO | protein heterodimerization activity    | 14 | 199 | 0.081 | 10055  | SUMO1 activating enzyme subunit 1                                      |
| GO | protein heterodimerization activity    | 14 | 199 | 0.081 | 2027   | enolase 3 (beta, muscle)                                               |
| GO | protein heterodimerization activity    | 14 | 199 | 0.081 | 23590  | prenyl (decaprenyl) diphosphate synthase, subunit 1                    |
| GO | protein heterodimerization activity    | 14 | 199 | 0.081 | 241    | arachidonate 5-lipoxygenase-activating protein                         |
| GO | protein heterodimerization activity    | 14 | 199 | 0.081 | 332    | baculoviral IAP repeat-containing 5                                    |
| GO | protein heterodimerization activity    | 14 | 199 | 0.081 | 348    | apolipoprotein E                                                       |
| GO | protein heterodimerization activity    | 14 | 199 | 0.081 | 3624   | inhibin, beta A                                                        |
| GO | protein heterodimerization activity    | 14 | 199 | 0.081 | 3751   | potassium voltage-gated channel, Shal-related subfamily, member 2      |
| GO | protein heterodimerization activity    | 14 | 199 | 0.081 | 5228   | placental growth factor                                                |
| GO | protein heterodimerization activity    | 14 | 199 | 0.081 | 581    | BCL2-associated X protein                                              |
| GO | protein heterodimerization activity    | 14 | 199 | 0.081 | 666    | BCL2-related ovarian killer                                            |
| GO | protein heterodimerization activity    | 14 | 199 | 0.081 | 7046   | transforming growth factor, beta receptor 1                            |
| GO | protein heterodimerization activity    | 14 | 199 | 0.081 | 83851  | synaptotagmin XVI                                                      |
| GO | activation of caspase activity         | 5  | 50  | 0.081 | 10395  | deleted in liver cancer 1                                              |
| GO | activation of caspase activity         | 5  | 50  | 0.081 | 2149   | coagulation factor II (thrombin) receptor                              |
| GO | activation of caspase activity         | 5  | 50  | 0.081 | 3336   | heat shock 10kDa protein 1 (chaperonin 10)                             |
| GO | activation of caspase activity         | 5  | 50  | 0.081 | 3932   | lymphocyte-specific protein tyrosine kinase                            |
| GO | activation of caspase activity         | 5  | 50  | 0.081 | 581    | BCL2-associated X protein                                              |
| GO | anterior/posterior pattern formation   | 7  | 81  | 0.082 | 1045   | caudal type homeobox 2                                                 |
| GO | anterior/posterior pattern formation   | 7  | 81  | 0.082 | 3224   | homeobox C8                                                            |
| GO | anterior/posterior pattern formation   | 7  | 81  | 0.082 | 3236   | homeobox D10                                                           |
| GO | anterior/posterior pattern formation   | 7  | 81  | 0.082 | 3237   | homeobox D11                                                           |
| GO | anterior/posterior pattern formation   | 7  | 81  | 0.082 | 5125   | proprotein convertase subtilisin/kexin type 5                          |
| GO | anterior/posterior pattern formation   | 7  | 81  | 0.082 | 659    | bone morphogenetic protein receptor, type II (serine/threonine kinase) |
| GO | anterior/posterior pattern formation   | 7  | 81  | 0.082 | 7046   | transforming growth factor, beta receptor 1                            |
| GO | nervous system development             | 24 | 382 | 0.083 | 10612  | tripartite motif-containing 3                                          |
| GO | nervous system development             | 24 | 382 | 0.083 | 1136   | cholinergic receptor, nicotinic, alpha 3                               |
| GO | nervous system development             | 24 | 382 | 0.083 | 182    | jagged 1 (Alagille syndrome)                                           |
| GO | nervous system development             | 24 | 382 | 0.083 | 266727 | MAM domain containing glycosylphosphatidylinositol anchor 1            |
| GO | nervous system development             | 24 | 382 | 0.083 | 29767  | tropomodulin 2 (neuronal)                                              |
| GO | nervous system development             | 24 | 382 | 0.083 | 3624   | inhibin, beta A                                                        |



|    |                            |    |     |       |                                                                                           |
|----|----------------------------|----|-----|-------|-------------------------------------------------------------------------------------------|
| GO | nervous system development | 24 | 382 | 0.083 | 3975 LIM homeobox 1                                                                       |
| GO | nervous system development | 24 | 382 | 0.083 | 4287 ataxin 3                                                                             |
| GO | nervous system development | 24 | 382 | 0.083 | 4830 non-metastatic cells 1, protein (NM23A) expressed in                                 |
| GO | nervous system development | 24 | 382 | 0.083 | 5026 purinergic receptor P2X, ligand-gated ion channel, 5                                 |
| GO | nervous system development | 24 | 382 | 0.083 | 5264 phytanoyl-CoA 2-hydroxylase                                                          |
| GO | nervous system development | 24 | 382 | 0.083 | 56133 protocadherin beta 2                                                                |
| GO | nervous system development | 24 | 382 | 0.083 | 6474 short stature homeobox 2                                                             |
| GO | nervous system development | 24 | 382 | 0.083 | 6586 slit homolog 3 (Drosophila)                                                          |
| GO | nervous system development | 24 | 382 | 0.083 | 6683 spastin                                                                              |
| GO | nervous system development | 24 | 382 | 0.083 | 6695 sparc/osteonectin, cwcv and kazal-like domains proteoglycan (testican) 1             |
| GO | nervous system development | 24 | 382 | 0.083 | 7021 transcription factor AP-2 beta (activating enhancer binding protein 2 beta)          |
| GO | nervous system development | 24 | 382 | 0.083 | 8193 D4, zinc and double PHD fingers family 1                                             |
| GO | nervous system development | 24 | 382 | 0.083 | 8482 semaphorin 7A, GPI membrane anchor (John Milton Hagen blood group)                   |
| GO | nervous system development | 24 | 382 | 0.083 | 8536 calcium/calmodulin-dependent protein kinase I                                        |
| GO | nervous system development | 24 | 382 | 0.083 | 89797 neuron navigator 2                                                                  |
| GO | nervous system development | 24 | 382 | 0.083 | 8997 kalirin, RhoGEF kinase                                                               |
| GO | nervous system development | 24 | 382 | 0.083 | 91584 plexin A4                                                                           |
| GO | nervous system development | 24 | 382 | 0.083 | 9839 zinc finger E-box binding homeobox 2                                                 |
| GO | transporter activity       | 19 | 290 | 0.083 | 11154 adaptor-related protein complex 4, sigma 1 subunit                                  |
| GO | transporter activity       | 19 | 290 | 0.083 | 116362 retinol binding protein 7, cellular                                                |
| GO | transporter activity       | 19 | 290 | 0.083 | 1836 solute carrier family 26 (sulfate transporter), member 2                             |
| GO | transporter activity       | 19 | 290 | 0.083 | 2171 fatty acid binding protein 5 (psoriasis-associated)                                  |
| GO | transporter activity       | 19 | 290 | 0.083 | 2172 fatty acid binding protein 6, ileal                                                  |
| GO | transporter activity       | 19 | 290 | 0.083 | 2558 gamma-aminobutyric acid (GABA) A receptor, alpha 5                                   |
| GO | transporter activity       | 19 | 290 | 0.083 | 27445 piccolo (presynaptic cytomatrix protein)                                            |
| GO | transporter activity       | 19 | 290 | 0.083 | 2906 glutamate receptor, ionotropic, N-methyl D-aspartate 2D                              |
| GO | transporter activity       | 19 | 290 | 0.083 | 4928 nucleoporin 98kDa                                                                    |
| GO | transporter activity       | 19 | 290 | 0.083 | 516 ATP synthase, H <sup>+</sup> transporting, mitochondrial F0 complex, subunit C1 (subu |
| GO | transporter activity       | 19 | 290 | 0.083 | 528 ATPase, H <sup>+</sup> transporting, lysosomal 42kDa, V1 subunit C1                   |
| GO | transporter activity       | 19 | 290 | 0.083 | 5947 retinol binding protein 1, cellular                                                  |
| GO | transporter activity       | 19 | 290 | 0.083 | 60386 solute carrier family 25 (mitochondrial thiamine pyrophosphate carrier), m          |
| GO | transporter activity       | 19 | 290 | 0.083 | 6518 solute carrier family 2 (facilitated glucose/fructose transporter), member 5         |
| GO | transporter activity       | 19 | 290 | 0.083 | 6527 solute carrier family 5 (low affinity glucose cotransporter), member 4               |
| GO | transporter activity       | 19 | 290 | 0.083 | 6580 solute carrier family 22 (organic cation transporter), member 1                      |
| GO | transporter activity       | 19 | 290 | 0.083 | 729025 solute carrier family 15, member 5                                                 |
| GO | transporter activity       | 19 | 290 | 0.083 | 8604 solute carrier family 25 (mitochondrial carrier, Aralar), member 12                  |

|    |                                        |    |     |       |        |                                                                          |
|----|----------------------------------------|----|-----|-------|--------|--------------------------------------------------------------------------|
| GO | transporter activity                   | 19 | 290 | 0.083 | 9497   | solute carrier family 4, sodium bicarbonate cotransporter, member 7      |
| GO | somitogenesis                          | 4  | 36  | 0.084 | 10512  | sema domain, immunoglobulin domain (Ig), short basic domain, secreted, ( |
| GO | somitogenesis                          | 4  | 36  | 0.084 | 10683  | delta-like 3 (Drosophila)                                                |
| GO | somitogenesis                          | 4  | 36  | 0.084 | 6422   | secreted frizzled-related protein 1                                      |
| GO | somitogenesis                          | 4  | 36  | 0.084 | 9839   | zinc finger E-box binding homeobox 2                                     |
| GO | DNA-directed RNA polymerase activity   | 4  | 36  | 0.084 | 10622  | polymerase (RNA) III (DNA directed) polypeptide G (32kD)                 |
| GO | DNA-directed RNA polymerase activity   | 4  | 36  | 0.084 | 25885  | polymerase (RNA) I polypeptide A, 194kDa                                 |
| GO | DNA-directed RNA polymerase activity   | 4  | 36  | 0.084 | 5440   | polymerase (RNA) II (DNA directed) polypeptide K, 7.0kDa                 |
| GO | DNA-directed RNA polymerase activity   | 4  | 36  | 0.084 | 84172  | polymerase (RNA) I polypeptide B, 128kDa                                 |
| GO | odontogenesis of dentine-containing to | 4  | 36  | 0.084 | 1746   | distal-less homeobox 2                                                   |
| GO | odontogenesis of dentine-containing to | 4  | 36  | 0.084 | 2736   | GLI family zinc finger 2                                                 |
| GO | odontogenesis of dentine-containing to | 4  | 36  | 0.084 | 431707 | LIM homeobox 8                                                           |
| GO | odontogenesis of dentine-containing to | 4  | 36  | 0.084 | 8626   | tumor protein p63                                                        |
| GO | lipid transport                        | 6  | 66  | 0.085 | 114880 | oxysterol binding protein-like 6                                         |
| GO | lipid transport                        | 6  | 66  | 0.085 | 26154  | ATP-binding cassette, sub-family A (ABC1), member 12                     |
| GO | lipid transport                        | 6  | 66  | 0.085 | 26207  | phosphatidylinositol transfer protein, cytoplasmic 1                     |
| GO | lipid transport                        | 6  | 66  | 0.085 | 348    | apolipoprotein E                                                         |
| GO | lipid transport                        | 6  | 66  | 0.085 | 5360   | phospholipid transfer protein                                            |
| GO | lipid transport                        | 6  | 66  | 0.085 | 79135  | apolipoprotein O                                                         |
| GO | synapse                                | 17 | 255 | 0.086 | 1000   | cadherin 2, type 1, N-cadherin (neuronal)                                |
| GO | synapse                                | 17 | 255 | 0.086 | 1136   | cholinergic receptor, nicotinic, alpha 3                                 |
| GO | synapse                                | 17 | 255 | 0.086 | 1138   | cholinergic receptor, nicotinic, alpha 5                                 |
| GO | synapse                                | 17 | 255 | 0.086 | 200959 | gamma-aminobutyric acid (GABA) receptor, rho 3                           |
| GO | synapse                                | 17 | 255 | 0.086 | 23705  | cell adhesion molecule 1                                                 |
| GO | synapse                                | 17 | 255 | 0.086 | 2558   | gamma-aminobutyric acid (GABA) A receptor, alpha 5                       |
| GO | synapse                                | 17 | 255 | 0.086 | 26059  | ELKS/RAB6-interacting/CAST family member 2                               |
| GO | synapse                                | 17 | 255 | 0.086 | 26999  | cytoplasmic FMR1 interacting protein 2                                   |
| GO | synapse                                | 17 | 255 | 0.086 | 27445  | piccolo (presynaptic cytomatrix protein)                                 |
| GO | synapse                                | 17 | 255 | 0.086 | 2898   | glutamate receptor, ionotropic, kainate 2                                |
| GO | synapse                                | 17 | 255 | 0.086 | 2906   | glutamate receptor, ionotropic, N-methyl D-aspartate 2D                  |
| GO | synapse                                | 17 | 255 | 0.086 | 30011  | SH3-domain kinase binding protein 1                                      |
| GO | synapse                                | 17 | 255 | 0.086 | 55752  | septin 11                                                                |
| GO | synapse                                | 17 | 255 | 0.086 | 8777   | multiple PDZ domain protein                                              |
| GO | synapse                                | 17 | 255 | 0.086 | 9419   | cysteine-rich PDZ-binding protein                                        |
| GO | synapse                                | 17 | 255 | 0.086 | 9455   | homer homolog 2 (Drosophila)                                             |
| GO | synapse                                | 17 | 255 | 0.086 | 9568   | gamma-aminobutyric acid (GABA) B receptor, 2                             |

|    |                                         |   |    |       |        |                                                                              |
|----|-----------------------------------------|---|----|-------|--------|------------------------------------------------------------------------------|
| GO | negative regulation of neuron apoptosis | 5 | 51 | 0.087 | 2149   | coagulation factor II (thrombin) receptor                                    |
| GO | negative regulation of neuron apoptosis | 5 | 51 | 0.087 | 2898   | glutamate receptor, ionotropic, kainate 2                                    |
| GO | negative regulation of neuron apoptosis | 5 | 51 | 0.087 | 4436   | mutS homolog 2, colon cancer, nonpolyposis type 1 (E. coli)                  |
| GO | negative regulation of neuron apoptosis | 5 | 51 | 0.087 | 4893   | neuroblastoma RAS viral (v-ras) oncogene homolog                             |
| GO | negative regulation of neuron apoptosis | 5 | 51 | 0.087 | 773    | calcium channel, voltage-dependent, P/Q type, alpha 1A subunit               |
| GO | ATP-dependent DNA helicase activity     | 3 | 23 | 0.089 | 1763   | DNA replication helicase 2 homolog (yeast)                                   |
| GO | ATP-dependent DNA helicase activity     | 3 | 23 | 0.089 | 5965   | RecQ protein-like (DNA helicase Q1-like)                                     |
| GO | ATP-dependent DNA helicase activity     | 3 | 23 | 0.089 | 641    | Bloom syndrome, RecQ helicase-like                                           |
| GO | activation of MAPKK activity            | 3 | 23 | 0.089 | 2149   | coagulation factor II (thrombin) receptor                                    |
| GO | activation of MAPKK activity            | 3 | 23 | 0.089 | 2321   | fms-related tyrosine kinase 1 (vascular endothelial growth factor/vascular p |
| GO | activation of MAPKK activity            | 3 | 23 | 0.089 | 7046   | transforming growth factor, beta receptor 1                                  |
| GO | negative regulation of cell adhesion    | 3 | 23 | 0.089 | 27289  | Rho family GTPase 1                                                          |
| GO | negative regulation of cell adhesion    | 3 | 23 | 0.089 | 5140   | phosphodiesterase 3B, cGMP-inhibited                                         |
| GO | negative regulation of cell adhesion    | 3 | 23 | 0.089 | 5420   | podocalyxin-like                                                             |
| GO | developmental growth                    | 3 | 23 | 0.089 | 2736   | GLI family zinc finger 2                                                     |
| GO | developmental growth                    | 3 | 23 | 0.089 | 3237   | homeobox D11                                                                 |
| GO | developmental growth                    | 3 | 23 | 0.089 | 7840   | Alstrom syndrome 1                                                           |
| GO | nuclear chromosome                      | 3 | 23 | 0.089 | 332    | baculoviral IAP repeat-containing 5                                          |
| GO | nuclear chromosome                      | 3 | 23 | 0.089 | 54984  | PIN2-interacting protein 1                                                   |
| GO | nuclear chromosome                      | 3 | 23 | 0.089 | 642636 | RAD21-like 1 (S. pombe)                                                      |
| GO | somatic stem cell maintenance           | 2 | 11 | 0.09  | 1045   | caudal type homeobox 2                                                       |
| GO | somatic stem cell maintenance           | 2 | 11 | 0.09  | 6657   | SRY (sex determining region Y)-box 2                                         |
| GO | GTPase inhibitor activity               | 2 | 11 | 0.09  | 10788  | IQ motif containing GTPase activating protein 2                              |
| GO | GTPase inhibitor activity               | 2 | 11 | 0.09  | 6242   | rhotekin                                                                     |
| GO | glycosaminoglycan biosynthetic process  | 2 | 11 | 0.09  | 11227  | UDP-N-acetyl-alpha-D-galactosamine:polypeptide N-acetylgalactosaminyltr      |
| GO | glycosaminoglycan biosynthetic process  | 2 | 11 | 0.09  | 64131  | xylosyltransferase I                                                         |
| GO | mitotic metaphase plate congression     | 2 | 11 | 0.09  | 113130 | cell division cycle associated 5                                             |
| GO | mitotic metaphase plate congression     | 2 | 11 | 0.09  | 54984  | PIN2-interacting protein 1                                                   |
| GO | retinol binding                         | 2 | 11 | 0.09  | 116362 | retinol binding protein 7, cellular                                          |
| GO | retinol binding                         | 2 | 11 | 0.09  | 5947   | retinol binding protein 1, cellular                                          |
| GO | platelet-derived growth factor binding  | 2 | 11 | 0.09  | 1282   | collagen, type IV, alpha 1                                                   |
| GO | platelet-derived growth factor binding  | 2 | 11 | 0.09  | 1289   | collagen, type V, alpha 1                                                    |
| GO | fibroblast growth factor binding        | 2 | 11 | 0.09  | 143282 | fibroblast growth factor binding protein 3                                   |
| GO | fibroblast growth factor binding        | 2 | 11 | 0.09  | 2264   | fibroblast growth factor receptor 4                                          |
| GO | chylomicron                             | 2 | 11 | 0.09  | 341    | apolipoprotein C-I                                                           |
| GO | chylomicron                             | 2 | 11 | 0.09  | 348    | apolipoprotein E                                                             |

|    |                                                             |   |    |       |        |                                                                           |
|----|-------------------------------------------------------------|---|----|-------|--------|---------------------------------------------------------------------------|
| GO | negative regulation of lipid catabolic process              | 2 | 11 | 0.09  | 341    | apolipoprotein C-I                                                        |
| GO | negative regulation of lipid catabolic process              | 2 | 11 | 0.09  | 5140   | phosphodiesterase 3B, cGMP-inhibited                                      |
| GO | vasodilation                                                | 2 | 11 | 0.09  | 348    | apolipoprotein E                                                          |
| GO | vasodilation                                                | 2 | 11 | 0.09  | 3778   | potassium large conductance calcium-activated channel, subfamily M, alpha |
| GO | 3',5'-cyclic-nucleotide phosphodiesterase activity          | 2 | 11 | 0.09  | 50940  | phosphodiesterase 11A                                                     |
| GO | 3',5'-cyclic-nucleotide phosphodiesterase activity          | 2 | 11 | 0.09  | 5140   | phosphodiesterase 3B, cGMP-inhibited                                      |
| GO | large ribosomal subunit                                     | 2 | 11 | 0.09  | 51121  | ribosomal protein L26-like 1                                              |
| GO | large ribosomal subunit                                     | 2 | 11 | 0.09  | 65008  | mitochondrial ribosomal protein L1                                        |
| GO | dipeptidase activity                                        | 2 | 11 | 0.09  | 5184   | peptidase D                                                               |
| GO | dipeptidase activity                                        | 2 | 11 | 0.09  | 9805   | secernin 1                                                                |
| GO | phosphatidylinositol-3,4-bisphosphate 3-kinase activity     | 2 | 11 | 0.09  | 5341   | pleckstrin                                                                |
| GO | phosphatidylinositol-3,4-bisphosphate 3-kinase activity     | 2 | 11 | 0.09  | 55803  | ArfGAP with dual PH domains 2                                             |
| GO | replication fork                                            | 2 | 11 | 0.09  | 56852  | RAD18 homolog ( <i>S. cerevisiae</i> )                                    |
| GO | replication fork                                            | 2 | 11 | 0.09  | 641    | Bloom syndrome, RecQ helicase-like                                        |
| GO | ubiquitin activating enzyme activity                        | 1 | 2  | 0.091 | 10055  | SUMO1 activating enzyme subunit 1                                         |
| GO | C21-steroid hormone metabolic process                       | 1 | 2  | 0.091 | 10202  | dehydrogenase/reductase (SDR family) member 2                             |
| GO | cardiac right ventricle morphogenesis                       | 1 | 2  | 0.091 | 10512  | sema domain, immunoglobulin domain (Ig), short basic domain, secreted, (  |
| GO | pulmonary myocardium development                            | 1 | 2  | 0.091 | 10512  | sema domain, immunoglobulin domain (Ig), short basic domain, secreted, (  |
| GO | semaphorin receptor binding                                 | 1 | 2  | 0.091 | 10512  | sema domain, immunoglobulin domain (Ig), short basic domain, secreted, (  |
| GO | activation of phospholipase D activity                      | 1 | 2  | 0.091 | 10672  | guanine nucleotide binding protein (G protein), alpha 13                  |
| GO | tRNA (guanine-N7-)-methyltransferase activity               | 1 | 2  | 0.091 | 10785  | WD repeat domain 4                                                        |
| GO | ADP-sugar diphosphatase activity                            | 1 | 2  | 0.091 | 11164  | nudix (nucleoside diphosphate linked moiety X)-type motif 5               |
| GO | Rab-protein geranylgeranyltransferase activity              | 1 | 2  | 0.091 | 1121   | choroideremia (Rab escort protein 1)                                      |
| GO | regulation of cellular component organization               | 1 | 2  | 0.091 | 1289   | collagen, type V, alpha 1                                                 |
| GO | deacetylase activity                                        | 1 | 2  | 0.091 | 13     | arylacetamide deacetylase (esterase)                                      |
| GO | collagen type XI                                            | 1 | 2  | 0.091 | 1301   | collagen, type XI, alpha 1                                                |
| GO | cytoplasmic transport                                       | 1 | 2  | 0.091 | 135295 | splicing factor, arginine/serine-rich 13B                                 |
| GO | radial glia guided migration of Purkinje cell               | 1 | 2  | 0.091 | 1496   | catenin (cadherin-associated protein), alpha 2                            |
| GO | regulation of synapse structural plasticity                 | 1 | 2  | 0.091 | 1496   | catenin (cadherin-associated protein), alpha 2                            |
| GO | CTP synthase activity                                       | 1 | 2  | 0.091 | 1503   | CTP synthase                                                              |
| GO | demethylase activity                                        | 1 | 2  | 0.091 | 1543   | cytochrome P450, family 1, subfamily A, polypeptide 1                     |
| GO | developmental process                                       | 1 | 2  | 0.091 | 1543   | cytochrome P450, family 1, subfamily A, polypeptide 1                     |
| GO | vitamin D 24-hydroxylase activity                           | 1 | 2  | 0.091 | 1543   | cytochrome P450, family 1, subfamily A, polypeptide 1                     |
| GO | benzodiazepine receptor binding                             | 1 | 2  | 0.091 | 1622   | diazepam binding inhibitor (GABA receptor modulator, acyl-Coenzyme A bi   |
| GO | cerebral cortex GABAergic interneuron fate                  | 1 | 2  | 0.091 | 1746   | distal-less homeobox 2                                                    |
| GO | regulation of transcription from RNA polymerase II promoter | 1 | 2  | 0.091 | 1746   | distal-less homeobox 2                                                    |

|    |                                            |   |   |       |       |                                                                    |
|----|--------------------------------------------|---|---|-------|-------|--------------------------------------------------------------------|
| GO | gamma DNA polymerase complex               | 1 | 2 | 0.091 | 1763  | DNA replication helicase 2 homolog (yeast)                         |
| GO | tRNA (cytosine-5-)-methyltransferase ac    | 1 | 2 | 0.091 | 1787  | tRNA aspartic acid methyltransferase 1                             |
| GO | DNA (cytosine-5-)-methyltransferase ac     | 1 | 2 | 0.091 | 1788  | DNA (cytosine-5-)-methyltransferase 3 alpha                        |
| GO | DNA methylation on cytosine within a C     | 1 | 2 | 0.091 | 1788  | DNA (cytosine-5-)-methyltransferase 3 alpha                        |
| GO | annulate lamellae                          | 1 | 2 | 0.091 | 1984  | eukaryotic translation initiation factor 5A                        |
| GO | PH domain binding                          | 1 | 2 | 0.091 | 2037  | erythrocyte membrane protein band 4.1-like 2                       |
| GO | glucuronyl-galactosyl-proteoglycan 4-alf   | 1 | 2 | 0.091 | 2135  | exostoses (multiple)-like 2                                        |
| GO | establishment of synaptic specificity at r | 1 | 2 | 0.091 | 2149  | coagulation factor II (thrombin) receptor                          |
| GO | platelet dense tubular network             | 1 | 2 | 0.091 | 2149  | coagulation factor II (thrombin) receptor                          |
| GO | olfactory pit development                  | 1 | 2 | 0.091 | 220   | aldehyde dehydrogenase 1 family, member A3                         |
| GO | retinoic acid biosynthetic process         | 1 | 2 | 0.091 | 220   | aldehyde dehydrogenase 1 family, member A3                         |
| GO | de novo' protein folding                   | 1 | 2 | 0.091 | 2281  | FK506 binding protein 1B, 12.6 kDa                                 |
| GO | negative regulation of protein phosphat    | 1 | 2 | 0.091 | 2281  | FK506 binding protein 1B, 12.6 kDa                                 |
| GO | regulation of cardiac muscle contractior   | 1 | 2 | 0.091 | 2281  | FK506 binding protein 1B, 12.6 kDa                                 |
| GO | release of sequestered calcium ion into    | 1 | 2 | 0.091 | 2281  | FK506 binding protein 1B, 12.6 kDa                                 |
| GO | pentose-phosphate shunt, non-oxidativ      | 1 | 2 | 0.091 | 22934 | ribose 5-phosphate isomerase A                                     |
| GO | glycerol-3-phosphate catabolic process     | 1 | 2 | 0.091 | 23171 | glycerol-3-phosphate dehydrogenase 1-like                          |
| GO | negative regulation of actin filament po   | 1 | 2 | 0.091 | 23189 | KN motif and ankyrin repeat domains 1                              |
| GO | positive regulation of plasma membran      | 1 | 2 | 0.091 | 23305 | acyl-CoA synthetase long-chain family member 6                     |
| GO | trans-hexaprenyltranstransferase activit   | 1 | 2 | 0.091 | 23590 | prenyl (decaprenyl) diphosphate synthase, subunit 1                |
| GO | trans-octaprenyltranstransferase activit   | 1 | 2 | 0.091 | 23590 | prenyl (decaprenyl) diphosphate synthase, subunit 1                |
| GO | detection of stimulus                      | 1 | 2 | 0.091 | 23705 | cell adhesion molecule 1                                           |
| GO | T cell mediated cytotoxicity               | 1 | 2 | 0.091 | 23705 | cell adhesion molecule 1                                           |
| GO | arachidonate 5-lipoxygenase activity       | 1 | 2 | 0.091 | 241   | arachidonate 5-lipoxygenase-activating protein                     |
| GO | hydroxyacylglutathione hydrolase activi    | 1 | 2 | 0.091 | 25953 | paroxysmal nonkinesigenic dyskinesia                               |
| GO | carbon-carbon lyase activity               | 1 | 2 | 0.091 | 26061 | 2-hydroxyacyl-CoA lyase 1                                          |
| GO | creatine biosynthetic process              | 1 | 2 | 0.091 | 2628  | glycine amidinotransferase (L-arginine:glycine amidinotransferase) |
| GO | glycine cleavage complex                   | 1 | 2 | 0.091 | 2653  | glycine cleavage system protein H (aminomethyl carrier)            |
| GO | notochord regression                       | 1 | 2 | 0.091 | 2736  | GLI family zinc finger 2                                           |
| GO | smoothened signaling pathway involvec      | 1 | 2 | 0.091 | 2736  | GLI family zinc finger 2                                           |
| GO | smoothened signaling pathway involvec      | 1 | 2 | 0.091 | 2736  | GLI family zinc finger 2                                           |
| GO | specification of segmental identity, max   | 1 | 2 | 0.091 | 2736  | GLI family zinc finger 2                                           |
| GO | spinal cord ventral commissure morpho      | 1 | 2 | 0.091 | 2736  | GLI family zinc finger 2                                           |
| GO | response to lipid hydroperoxide            | 1 | 2 | 0.091 | 2878  | glutathione peroxidase 3 (plasma)                                  |
| GO | kainate selective glutamate receptor co    | 1 | 2 | 0.091 | 2898  | glutamate receptor, ionotropic, kainate 2                          |
| GO | voltage-gated cation channel activity      | 1 | 2 | 0.091 | 2906  | glutamate receptor, ionotropic, N-methyl D-aspartate 2D            |

|    |                                            |   |   |       |       |                                                                                    |
|----|--------------------------------------------|---|---|-------|-------|------------------------------------------------------------------------------------|
| GO | cytoplasm organization                     | 1 | 2 | 0.091 | 29842 | transcription factor CP2-like 1                                                    |
| GO | positive regulation of growth              | 1 | 2 | 0.091 | 29842 | transcription factor CP2-like 1                                                    |
| GO | dermatan sulfate biosynthetic process      | 1 | 2 | 0.091 | 29940 | dermatan sulfate epimerase                                                         |
| GO | hydroxymethylglutaryl-CoA synthase ac      | 1 | 2 | 0.091 | 3157  | 3-hydroxy-3-methylglutaryl-Coenzyme A synthase 1 (soluble)                         |
| GO | positive regulation of cell development    | 1 | 2 | 0.091 | 3237  | homeobox D11                                                                       |
| GO | 15-hydroxyprostaglandin dehydrogenas       | 1 | 2 | 0.091 | 3248  | hydroxyprostaglandin dehydrogenase 15-(NAD)                                        |
| GO | N-methyltransferase activity               | 1 | 2 | 0.091 | 3276  | protein arginine methyltransferase 1                                               |
| GO | establishment of chromosome localizati     | 1 | 2 | 0.091 | 332   | baculoviral IAP repeat-containing 5                                                |
| GO | follistatin binding                        | 1 | 2 | 0.091 | 3624  | inhibin, beta A                                                                    |
| GO | inhibin A complex                          | 1 | 2 | 0.091 | 3624  | inhibin, beta A                                                                    |
| GO | negative regulation of lipoprotein metal   | 1 | 2 | 0.091 | 3685  | integrin, alpha V (vitronectin receptor, alpha polypeptide, antigen CD51)          |
| GO | neuronal cell body membrane                | 1 | 2 | 0.091 | 3763  | potassium inwardly-rectifying channel, subfamily J, member 6                       |
| GO | smooth muscle contraction involved in i    | 1 | 2 | 0.091 | 3778  | potassium large conductance calcium-activated channel, subfamily M, alph           |
| GO | M phase specific microtubule process       | 1 | 2 | 0.091 | 3838  | karyopherin alpha 2 (RAG cohort 1, importin alpha 1)                               |
| GO | CD4 receptor binding                       | 1 | 2 | 0.091 | 3932  | lymphocyte-specific protein tyrosine kinase                                        |
| GO | leptin-mediated signaling pathway          | 1 | 2 | 0.091 | 3952  | leptin                                                                             |
| GO | cerebellar Purkinje cell-granule cell prec | 1 | 2 | 0.091 | 3975  | LIM homeobox 1                                                                     |
| GO | ectoderm formation                         | 1 | 2 | 0.091 | 3975  | LIM homeobox 1                                                                     |
| GO | forebrain regionalization                  | 1 | 2 | 0.091 | 3975  | LIM homeobox 1                                                                     |
| GO | head development                           | 1 | 2 | 0.091 | 3975  | LIM homeobox 1                                                                     |
| GO | angiotensin receptor binding               | 1 | 2 | 0.091 | 409   | arrestin, beta 2                                                                   |
| GO | N-acetylgalactosamine-4-sulfatase activ    | 1 | 2 | 0.091 | 411   | arylsulfatase B                                                                    |
| GO | chiasma                                    | 1 | 2 | 0.091 | 4292  | mutL homolog 1, colon cancer, nonpolyposis type 2 (E. coli)                        |
| GO | MutLalpha complex                          | 1 | 2 | 0.091 | 4292  | mutL homolog 1, colon cancer, nonpolyposis type 2 (E. coli)                        |
| GO | B cell mediated immunity                   | 1 | 2 | 0.091 | 4436  | mutS homolog 2, colon cancer, nonpolyposis type 1 (E. coli)                        |
| GO | dinucleotide repeat insertion binding      | 1 | 2 | 0.091 | 4436  | mutS homolog 2, colon cancer, nonpolyposis type 1 (E. coli)                        |
| GO | MutSalpha complex                          | 1 | 2 | 0.091 | 4436  | mutS homolog 2, colon cancer, nonpolyposis type 1 (E. coli)                        |
| GO | MutSbeta complex                           | 1 | 2 | 0.091 | 4436  | mutS homolog 2, colon cancer, nonpolyposis type 1 (E. coli)                        |
| GO | single thymine insertion binding           | 1 | 2 | 0.091 | 4436  | mutS homolog 2, colon cancer, nonpolyposis type 1 (E. coli)                        |
| GO | beta-2 adrenergic receptor binding         | 1 | 2 | 0.091 | 4734  | neural precursor cell expressed, developmentally down-regulated 4                  |
| GO | phosphothreonine binding                   | 1 | 2 | 0.091 | 4734  | neural precursor cell expressed, developmentally down-regulated 4                  |
| GO | regulation of Ras GTPase activity          | 1 | 2 | 0.091 | 4763  | neurofibromin 1                                                                    |
| GO | Schwann cell development                   | 1 | 2 | 0.091 | 4763  | neurofibromin 1                                                                    |
| GO | hydrogen:potassium-exchanging ATPase       | 1 | 2 | 0.091 | 479   | ATPase, H <sup>+</sup> /K <sup>+</sup> transporting, nongastric, alpha polypeptide |
| GO | protein import into nucleus, docking       | 1 | 2 | 0.091 | 4928  | nucleoporin 98kDa                                                                  |
| GO | regulation of fibroblast growth factor re  | 1 | 2 | 0.091 | 5015  | orthodenticle homeobox 2                                                           |

|    |                                            |   |   |       |                                                                                    |
|----|--------------------------------------------|---|---|-------|------------------------------------------------------------------------------------|
| GO | regulation of digestive system process     | 1 | 2 | 0.091 | 5021 oxytocin receptor                                                             |
| GO | response to anoxia                         | 1 | 2 | 0.091 | 5021 oxytocin receptor                                                             |
| GO | negative regulation of norepinephrine s    | 1 | 2 | 0.091 | 5028 purinergic receptor P2Y, G-protein coupled, 1                                 |
| GO | UDP-activated nucleotide receptor activ    | 1 | 2 | 0.091 | 5031 pyrimidinergic receptor P2Y, G-protein coupled, 6                             |
| GO | chronological cell aging                   | 1 | 2 | 0.091 | 5054 serpin peptidase inhibitor, clade E (nexin, plasminogen activator inhibitor t |
| GO | viral assembly, maturation, egress, and    | 1 | 2 | 0.091 | 5125 proprotein convertase subtilisin/kexin type 5                                 |
| GO | cGMP-inhibited cyclic-nucleotide phosp     | 1 | 2 | 0.091 | 5140 phosphodiesterase 3B, cGMP-inhibited                                          |
| GO | regulation of morphogenesis of a brancl    | 1 | 2 | 0.091 | 5228 placental growth factor                                                       |
| GO | negative regulation of calcium-mediate     | 1 | 2 | 0.091 | 5341 pleckstrin                                                                    |
| GO | platelet degranulation                     | 1 | 2 | 0.091 | 5341 pleckstrin                                                                    |
| GO | positive regulation of actin filament dep  | 1 | 2 | 0.091 | 5341 pleckstrin                                                                    |
| GO | positive regulation of integrin activation | 1 | 2 | 0.091 | 5341 pleckstrin                                                                    |
| GO | thrombin receptor signaling pathway        | 1 | 2 | 0.091 | 5341 pleckstrin                                                                    |
| GO | calcium-dependent cell-matrix adhesior     | 1 | 2 | 0.091 | 54822 transient receptor potential cation channel, subfamily M, member 7           |
| GO | telomeric RNA binding                      | 1 | 2 | 0.091 | 54984 PIN2-interacting protein 1                                                   |
| GO | drug transmembrane transport               | 1 | 2 | 0.091 | 55244 solute carrier family 47, member 1                                           |
| GO | oleoyl-[acyl-carrier-protein] hydrolase a  | 1 | 2 | 0.091 | 55301 oleoyl-ACP hydrolase                                                         |
| GO | dosage compensation                        | 1 | 2 | 0.091 | 55506 H2A histone family, member Y2                                                |
| GO | N-acylmannosamine kinase activity          | 1 | 2 | 0.091 | 55577 N-acetylglucosamine kinase                                                   |
| GO | maturation of 5.8S rRNA from tricistron    | 1 | 2 | 0.091 | 55759 WD repeat domain 12                                                          |
| GO | preribosome, large subunit precursor       | 1 | 2 | 0.091 | 55759 WD repeat domain 12                                                          |
| GO | mRNA (2'-O-methyladenosine-N6-)-met        | 1 | 2 | 0.091 | 56339 methyltransferase like 3                                                     |
| GO | interleukin-2 secretion                    | 1 | 2 | 0.091 | 57678 glycerol-3-phosphate acyltransferase, mitochondrial                          |
| GO | BH3 domain binding                         | 1 | 2 | 0.091 | 581 BCL2-associated X protein                                                      |
| GO | establishment or maintenance of transr     | 1 | 2 | 0.091 | 581 BCL2-associated X protein                                                      |
| GO | mitochondrial fragmentation involved in    | 1 | 2 | 0.091 | 581 BCL2-associated X protein                                                      |
| GO | nuclear fragmentation involved in apop     | 1 | 2 | 0.091 | 581 BCL2-associated X protein                                                      |
| GO | branched chain family amino acid biosyl    | 1 | 2 | 0.091 | 586 branched chain aminotransferase 1, cytosolic                                   |
| GO | branched-chain-amino-acid transamina:      | 1 | 2 | 0.091 | 586 branched chain aminotransferase 1, cytosolic                                   |
| GO | crossover junction endodeoxyribonucle:     | 1 | 2 | 0.091 | 5889 RAD51 homolog C (S. cerevisiae)                                               |
| GO | female meiosis sister chromatid cohesic    | 1 | 2 | 0.091 | 5889 RAD51 homolog C (S. cerevisiae)                                               |
| GO | acetylcholinesterase activity              | 1 | 2 | 0.091 | 590 butyrylcholinesterase                                                          |
| GO | response to alkaloid                       | 1 | 2 | 0.091 | 590 butyrylcholinesterase                                                          |
| GO | DNA strand renaturation                    | 1 | 2 | 0.091 | 5965 RecQ protein-like (DNA helicase Q1-like)                                      |
| GO | class I ribonucleotide reductase activity  | 1 | 2 | 0.091 | 6241 ribonucleotide reductase M2                                                   |
| GO | deoxyribonucleoside diphosphate meta       | 1 | 2 | 0.091 | 6241 ribonucleotide reductase M2                                                   |

|    |                                           |   |   |       |                                                                                   |
|----|-------------------------------------------|---|---|-------|-----------------------------------------------------------------------------------|
| GO | olfactory bulb interneuron differentiat   | 1 | 2 | 0.091 | 6299 sal-like 1 (Drosophila)                                                      |
| GO | olfactory nerve development               | 1 | 2 | 0.091 | 6299 sal-like 1 (Drosophila)                                                      |
| GO | regulation of vascular endothelial growt  | 1 | 2 | 0.091 | 6347 chemokine (C-C motif) ligand 2                                               |
| GO | response to vitamin B3                    | 1 | 2 | 0.091 | 6347 chemokine (C-C motif) ligand 2                                               |
| GO | alpha-beta T cell differentiation         | 1 | 2 | 0.091 | 641 Bloom syndrome, RecQ helicase-like                                            |
| GO | four-way junction helicase activity       | 1 | 2 | 0.091 | 641 Bloom syndrome, RecQ helicase-like                                            |
| GO | replication fork processing               | 1 | 2 | 0.091 | 641 Bloom syndrome, RecQ helicase-like                                            |
| GO | negative regulation of axon regeneratio   | 1 | 2 | 0.091 | 64131 xylosyltransferase I                                                        |
| GO | protein xylosyltransferase activity       | 1 | 2 | 0.091 | 64131 xylosyltransferase I                                                        |
| GO | fructose transmembrane transporter ac     | 1 | 2 | 0.091 | 6518 solute carrier family 2 (facilitated glucose/fructose transporter), member 5 |
| GO | fructose transport                        | 1 | 2 | 0.091 | 6518 solute carrier family 2 (facilitated glucose/fructose transporter), member 5 |
| GO | cytosolic calcium ion transport           | 1 | 2 | 0.091 | 6546 solute carrier family 8 (sodium/calcium exchanger), member 1                 |
| GO | negative regulation of vasoconstriction   | 1 | 2 | 0.091 | 659 bone morphogenetic protein receptor, type II (serine/threonine kinase)        |
| GO | negative regulation of viral transcriptio | 1 | 2 | 0.091 | 6672 SP100 nuclear antigen                                                        |
| GO | nuclear periphery                         | 1 | 2 | 0.091 | 6672 SP100 nuclear antigen                                                        |
| GO | cytokinesis, completion of separation     | 1 | 2 | 0.091 | 6683 spastin                                                                      |
| GO | protein hexamerization                    | 1 | 2 | 0.091 | 6683 spastin                                                                      |
| GO | 2,3-bisphospho-D-glycerate 2-phospho      | 1 | 2 | 0.091 | 669 2,3-bisphosphoglycerate mutase                                                |
| GO | bisphosphoglycerate mutase activity       | 1 | 2 | 0.091 | 669 2,3-bisphosphoglycerate mutase                                                |
| GO | phosphoglycerate mutase activity          | 1 | 2 | 0.091 | 669 2,3-bisphosphoglycerate mutase                                                |
| GO | cuticular plate                           | 1 | 2 | 0.091 | 6711 spectrin, beta, non-erythrocytic 1                                           |
| GO | BRCA1-BARD1 complex                       | 1 | 2 | 0.091 | 672 breast cancer 1, early onset                                                  |
| GO | alcohol sulfotransferase activity         | 1 | 2 | 0.091 | 6820 sulfotransferase family, cytosolic, 2B, member 1                             |
| GO | steroid sulfotransferase activity         | 1 | 2 | 0.091 | 6820 sulfotransferase family, cytosolic, 2B, member 1                             |
| GO | sulfonylurea receptor activity            | 1 | 2 | 0.091 | 6833 ATP-binding cassette, sub-family C (CFTR/MRP), member 8                      |
| GO | transferrin receptor activity             | 1 | 2 | 0.091 | 7037 transferrin receptor (p90, CD71)                                             |
| GO | negative regulation of endothelial cell d | 1 | 2 | 0.091 | 7046 transforming growth factor, beta receptor 1                                  |
| GO | ISG15 ligase activity                     | 1 | 2 | 0.091 | 7324 ubiquitin-conjugating enzyme E2E 1 (UBC4/5 homolog, yeast)                   |
| GO | musculoskeletal movement, spinal refle    | 1 | 2 | 0.091 | 773 calcium channel, voltage-dependent, P/Q type, alpha 1A subunit                |
| GO | sulfur amino acid metabolic process       | 1 | 2 | 0.091 | 773 calcium channel, voltage-dependent, P/Q type, alpha 1A subunit                |
| GO | regulation of fat cell differentiation    | 1 | 2 | 0.091 | 7840 Alstrom syndrome 1                                                           |
| GO | labyrinthine layer morphogenesis          | 1 | 2 | 0.091 | 80712 ESX homeobox 1                                                              |
| GO | carbohydrate mediated signaling           | 1 | 2 | 0.091 | 81035 collectin sub-family member 12                                              |
| GO | beta-galactoside alpha-2,6-sialyltransfe  | 1 | 2 | 0.091 | 84620 ST6 beta-galactosamide alpha-2,6-sialyltransferase 2                        |
| GO | chromatin silencing at telomere           | 1 | 2 | 0.091 | 8520 histone acetyltransferase 1                                                  |
| GO | internal protein amino acid acetylation   | 1 | 2 | 0.091 | 8520 histone acetyltransferase 1                                                  |



|    |                                         |   |     |       |                                                                        |
|----|-----------------------------------------|---|-----|-------|------------------------------------------------------------------------|
| GO | cloacal septation                       | 1 | 2   | 0.091 | 8626 tumor protein p63                                                 |
| GO | female genitalia morphogenesis          | 1 | 2   | 0.091 | 8626 tumor protein p63                                                 |
| GO | rough microsome                         | 1 | 2   | 0.091 | 8626 tumor protein p63                                                 |
| GO | proline metabolic process               | 1 | 2   | 0.091 | 8659 aldehyde dehydrogenase 4 family, member A1                        |
| GO | JAK pathway signal transduction adaptor | 1 | 2   | 0.091 | 8835 suppressor of cytokine signaling 2                                |
| GO | prolactin receptor binding              | 1 | 2   | 0.091 | 8835 suppressor of cytokine signaling 2                                |
| GO | male pronucleus                         | 1 | 2   | 0.091 | 890 cyclin A2                                                          |
| GO | antral ovarian follicle growth          | 1 | 2   | 0.091 | 898 cyclin E1                                                          |
| GO | response to purine                      | 1 | 2   | 0.091 | 898 cyclin E1                                                          |
| GO | cell-substrate adherens junction        | 1 | 2   | 0.091 | 91624 nexilin (F actin binding protein)                                |
| GO | D-amino acid catabolic process          | 1 | 2   | 0.091 | 92675 D-tyrosyl-tRNA deacylase 1 homolog ( <i>S. cerevisiae</i> )      |
| GO | oxysterol 7-alpha-hydroxylase activity  | 1 | 2   | 0.091 | 9420 cytochrome P450, family 7, subfamily B, polypeptide 1             |
| GO | GKAP/Homer scaffold activity            | 1 | 2   | 0.091 | 9455 homer homolog 2 ( <i>Drosophila</i> )                             |
| GO | acylphosphatase activity                | 1 | 2   | 0.091 | 97 acylphosphatase 1, erythrocyte (common) type                        |
| GO | stereocilium bundle                     | 1 | 2   | 0.091 | 9732 dedicator of cytokinesis 4                                        |
| GO | phosphatase regulator activity          | 1 | 2   | 0.091 | 9839 zinc finger E-box binding homeobox 2                              |
| GO | central nervous system development      | 8 | 100 | 0.093 | 10683 delta-like 3 ( <i>Drosophila</i> )                               |
| GO | central nervous system development      | 8 | 100 | 0.093 | 27330 ribosomal protein S6 kinase, 90kDa, polypeptide 6                |
| GO | central nervous system development      | 8 | 100 | 0.093 | 411 arylsulfatase B                                                    |
| GO | central nervous system development      | 8 | 100 | 0.093 | 4884 neuronal pentraxin I                                              |
| GO | central nervous system development      | 8 | 100 | 0.093 | 4897 neuronal cell adhesion molecule                                   |
| GO | central nervous system development      | 8 | 100 | 0.093 | 7078 TIMP metalloproteinase inhibitor 3                                |
| GO | central nervous system development      | 8 | 100 | 0.093 | 92737 delta/notch-like EGF repeat containing                           |
| GO | central nervous system development      | 8 | 100 | 0.093 | 9839 zinc finger E-box binding homeobox 2                              |
| GO | protein domain specific binding         | 9 | 117 | 0.094 | 10474 transcriptional adaptor 3                                        |
| GO | protein domain specific binding         | 9 | 117 | 0.094 | 4291 myeloid leukemia factor 1                                         |
| GO | protein domain specific binding         | 9 | 117 | 0.094 | 4734 neural precursor cell expressed, developmentally down-regulated 4 |
| GO | protein domain specific binding         | 9 | 117 | 0.094 | 6672 SP100 nuclear antigen                                             |
| GO | protein domain specific binding         | 9 | 117 | 0.094 | 7029 transcription factor Dp-2 (E2F dimerization partner 2)            |
| GO | protein domain specific binding         | 9 | 117 | 0.094 | 7137 troponin I type 3 (cardiac)                                       |
| GO | protein domain specific binding         | 9 | 117 | 0.094 | 7846 tubulin, alpha 1a                                                 |
| GO | protein domain specific binding         | 9 | 117 | 0.094 | 8626 tumor protein p63                                                 |
| GO | protein domain specific binding         | 9 | 117 | 0.094 | 9419 cysteine-rich PDZ-binding protein                                 |
| GO | ubiquitin thiolesterase activity        | 6 | 68  | 0.095 | 10213 proteasome (prosome, macropain) 26S subunit, non-ATPase, 14      |
| GO | ubiquitin thiolesterase activity        | 6 | 68  | 0.095 | 373856 ubiquitin specific peptidase 41                                 |
| GO | ubiquitin thiolesterase activity        | 6 | 68  | 0.095 | 4287 ataxin 3                                                          |

|    |                                       |    |      |       |       |                                                                                     |
|----|---------------------------------------|----|------|-------|-------|-------------------------------------------------------------------------------------|
| GO | ubiquitin thiolesterase activity      | 6  | 68   | 0.095 | 57478 | ubiquitin specific peptidase 31                                                     |
| GO | ubiquitin thiolesterase activity      | 6  | 68   | 0.095 | 7347  | ubiquitin carboxyl-terminal esterase L3 (ubiquitin thiolesterase)                   |
| GO | ubiquitin thiolesterase activity      | 6  | 68   | 0.095 | 84101 | ubiquitin specific peptidase 44                                                     |
| GO | calcium-dependent cell-cell adhesion  | 3  | 24   | 0.098 | 1000  | cadherin 2, type 1, N-cadherin (neuronal)                                           |
| GO | calcium-dependent cell-cell adhesion  | 3  | 24   | 0.098 | 56126 | protocadherin beta 10                                                               |
| GO | calcium-dependent cell-cell adhesion  | 3  | 24   | 0.098 | 56133 | protocadherin beta 2                                                                |
| GO | platelet activation                   | 3  | 24   | 0.098 | 10672 | guanine nucleotide binding protein (G protein), alpha 13                            |
| GO | platelet activation                   | 3  | 24   | 0.098 | 2149  | coagulation factor II (thrombin) receptor                                           |
| GO | platelet activation                   | 3  | 24   | 0.098 | 3589  | interleukin 11                                                                      |
| GO | regulation of membrane potential      | 3  | 24   | 0.098 | 1136  | cholinergic receptor, nicotinic, alpha 3                                            |
| GO | regulation of membrane potential      | 3  | 24   | 0.098 | 2898  | glutamate receptor, ionotropic, kainate 2                                           |
| GO | regulation of membrane potential      | 3  | 24   | 0.098 | 3778  | potassium large conductance calcium-activated channel, subfamily M, alpha           |
| GO | neuromuscular junction                | 3  | 24   | 0.098 | 2045  | EPH receptor A7                                                                     |
| GO | neuromuscular junction                | 3  | 24   | 0.098 | 2149  | coagulation factor II (thrombin) receptor                                           |
| GO | neuromuscular junction                | 3  | 24   | 0.098 | 5588  | protein kinase C, theta                                                             |
| GO | response to progesterone stimulus     | 3  | 24   | 0.098 | 5021  | oxytocin receptor                                                                   |
| GO | response to progesterone stimulus     | 3  | 24   | 0.098 | 6347  | chemokine (C-C motif) ligand 2                                                      |
| GO | response to progesterone stimulus     | 3  | 24   | 0.098 | 898   | cyclin E1                                                                           |
| GO | negative regulation of cell migration | 4  | 38   | 0.098 | 10395 | deleted in liver cancer 1                                                           |
| GO | negative regulation of cell migration | 4  | 38   | 0.098 | 4763  | neurofibromin 1                                                                     |
| GO | negative regulation of cell migration | 4  | 38   | 0.098 | 5054  | serpin peptidase inhibitor, clade E (nexin, plasminogen activator inhibitor type 1) |
| GO | negative regulation of cell migration | 4  | 38   | 0.098 | 7168  | tropomyosin 1 (alpha)                                                               |
| GO | spliceosomal complex                  | 9  | 118  | 0.098 | 10189 | THO complex 4                                                                       |
| GO | spliceosomal complex                  | 9  | 118  | 0.098 | 10465 | peptidylprolyl isomerase H (cyclophilin H)                                          |
| GO | spliceosomal complex                  | 9  | 118  | 0.098 | 10492 | synaptotagmin binding, cytoplasmic RNA interacting protein                          |
| GO | spliceosomal complex                  | 9  | 118  | 0.098 | 27258 | LSM3 homolog, U6 small nuclear RNA associated ( <i>S. cerevisiae</i> )              |
| GO | spliceosomal complex                  | 9  | 118  | 0.098 | 3183  | heterogeneous nuclear ribonucleoprotein C (C1/C2)                                   |
| GO | spliceosomal complex                  | 9  | 118  | 0.098 | 51645 | peptidylprolyl isomerase (cyclophilin)-like 1                                       |
| GO | spliceosomal complex                  | 9  | 118  | 0.098 | 6637  | small nuclear ribonucleoprotein polypeptide G                                       |
| GO | spliceosomal complex                  | 9  | 118  | 0.098 | 79833 | gem (nuclear organelle) associated protein 6                                        |
| GO | spliceosomal complex                  | 9  | 118  | 0.098 | 8458  | transcription termination factor, RNA polymerase II                                 |
| GO | nucleotide binding                    | 98 | 1859 | 0.099 | 10000 | v-akt murine thymoma viral oncogene homolog 3 (protein kinase B, gamma)             |
| GO | nucleotide binding                    | 98 | 1859 | 0.099 | 10051 | structural maintenance of chromosomes 4                                             |
| GO | nucleotide binding                    | 98 | 1859 | 0.099 | 10056 | phenylalanyl-tRNA synthetase, beta subunit                                          |
| GO | nucleotide binding                    | 98 | 1859 | 0.099 | 10096 | ARP3 actin-related protein 3 homolog (yeast)                                        |
| GO | nucleotide binding                    | 98 | 1859 | 0.099 | 10097 | ARP2 actin-related protein 2 homolog (yeast)                                        |

|    |                    |    |      |       |        |                                                                               |
|----|--------------------|----|------|-------|--------|-------------------------------------------------------------------------------|
| GO | nucleotide binding | 98 | 1859 | 0.099 | 10123  | ADP-ribosylation factor-like 4C                                               |
| GO | nucleotide binding | 98 | 1859 | 0.099 | 10189  | THO complex 4                                                                 |
| GO | nucleotide binding | 98 | 1859 | 0.099 | 10212  | DEAD (Asp-Glu-Ala-Asp) box polypeptide 39                                     |
| GO | nucleotide binding | 98 | 1859 | 0.099 | 10492  | synaptotagmin binding, cytoplasmic RNA interacting protein                    |
| GO | nucleotide binding | 98 | 1859 | 0.099 | 10672  | guanine nucleotide binding protein (G protein), alpha 13                      |
| GO | nucleotide binding | 98 | 1859 | 0.099 | 10808  | heat shock 105kDa/110kDa protein 1                                            |
| GO | nucleotide binding | 98 | 1859 | 0.099 | 10890  | RAB10, member RAS oncogene family                                             |
| GO | nucleotide binding | 98 | 1859 | 0.099 | 11056  | DEAD (Asp-Glu-Ala-Asp) box polypeptide 52                                     |
| GO | nucleotide binding | 98 | 1859 | 0.099 | 121268 | Ras homolog enriched in brain like 1                                          |
| GO | nucleotide binding | 98 | 1859 | 0.099 | 124540 | musashi homolog 2 (Drosophila)                                                |
| GO | nucleotide binding | 98 | 1859 | 0.099 | 132158 | glycerate kinase                                                              |
| GO | nucleotide binding | 98 | 1859 | 0.099 | 132430 | poly(A) binding protein, cytoplasmic 4-like                                   |
| GO | nucleotide binding | 98 | 1859 | 0.099 | 135295 | splicing factor, arginine/serine-rich 13B                                     |
| GO | nucleotide binding | 98 | 1859 | 0.099 | 140739 | ubiquitin-conjugating enzyme E2F (putative)                                   |
| GO | nucleotide binding | 98 | 1859 | 0.099 | 1503   | CTP synthase                                                                  |
| GO | nucleotide binding | 98 | 1859 | 0.099 | 1716   | deoxyguanosine kinase                                                         |
| GO | nucleotide binding | 98 | 1859 | 0.099 | 1763   | DNA replication helicase 2 homolog (yeast)                                    |
| GO | nucleotide binding | 98 | 1859 | 0.099 | 1841   | deoxythymidylate kinase (thymidylate kinase)                                  |
| GO | nucleotide binding | 98 | 1859 | 0.099 | 1983   | eukaryotic translation initiation factor 5                                    |
| GO | nucleotide binding | 98 | 1859 | 0.099 | 201299 | RAD52 motif 1                                                                 |
| GO | nucleotide binding | 98 | 1859 | 0.099 | 203    | adenylate kinase 1                                                            |
| GO | nucleotide binding | 98 | 1859 | 0.099 | 2045   | EPH receptor A7                                                               |
| GO | nucleotide binding | 98 | 1859 | 0.099 | 2242   | feline sarcoma oncogene                                                       |
| GO | nucleotide binding | 98 | 1859 | 0.099 | 2264   | fibroblast growth factor receptor 4                                           |
| GO | nucleotide binding | 98 | 1859 | 0.099 | 23057  | nicotinamide nucleotide adenyltransferase 2                                   |
| GO | nucleotide binding | 98 | 1859 | 0.099 | 23157  | septin 6                                                                      |
| GO | nucleotide binding | 98 | 1859 | 0.099 | 2321   | fms-related tyrosine kinase 1 (vascular endothelial growth factor/vascular p  |
| GO | nucleotide binding | 98 | 1859 | 0.099 | 23305  | acyl-CoA synthetase long-chain family member 6                                |
| GO | nucleotide binding | 98 | 1859 | 0.099 | 2534   | FYN oncogene related to SRC, FGR, YES                                         |
| GO | nucleotide binding | 98 | 1859 | 0.099 | 26154  | ATP-binding cassette, sub-family A (ABC1), member 12                          |
| GO | nucleotide binding | 98 | 1859 | 0.099 | 2618   | phosphoribosylglycinamide formyltransferase, phosphoribosylglycinamide        |
| GO | nucleotide binding | 98 | 1859 | 0.099 | 27289  | Rho family GTPase 1                                                           |
| GO | nucleotide binding | 98 | 1859 | 0.099 | 27330  | ribosomal protein S6 kinase, 90kDa, polypeptide 6                             |
| GO | nucleotide binding | 98 | 1859 | 0.099 | 2774   | guanine nucleotide binding protein (G protein), alpha activating activity pol |
| GO | nucleotide binding | 98 | 1859 | 0.099 | 29922  | non-metastatic cells 7, protein expressed in (nucleoside-diphosphate kinase)  |
| GO | nucleotide binding | 98 | 1859 | 0.099 | 3183   | heterogeneous nuclear ribonucleoprotein C (C1/C2)                             |

|    |                    |    |      |       |        |                                                                           |
|----|--------------------|----|------|-------|--------|---------------------------------------------------------------------------|
| GO | nucleotide binding | 98 | 1859 | 0.099 | 340273 | ATP-binding cassette, sub-family B (MDR/TAP), member 5                    |
| GO | nucleotide binding | 98 | 1859 | 0.099 | 347733 | tubulin, beta 2B                                                          |
| GO | nucleotide binding | 98 | 1859 | 0.099 | 348093 | RNA binding protein with multiple splicing 2                              |
| GO | nucleotide binding | 98 | 1859 | 0.099 | 3797   | kinesin family member 3C                                                  |
| GO | nucleotide binding | 98 | 1859 | 0.099 | 3800   | kinesin family member 5C                                                  |
| GO | nucleotide binding | 98 | 1859 | 0.099 | 3932   | lymphocyte-specific protein tyrosine kinase                               |
| GO | nucleotide binding | 98 | 1859 | 0.099 | 4171   | minichromosome maintenance complex component 2                            |
| GO | nucleotide binding | 98 | 1859 | 0.099 | 4430   | myosin IB                                                                 |
| GO | nucleotide binding | 98 | 1859 | 0.099 | 4436   | mutS homolog 2, colon cancer, nonpolyposis type 1 (E. coli)               |
| GO | nucleotide binding | 98 | 1859 | 0.099 | 4651   | myosin X                                                                  |
| GO | nucleotide binding | 98 | 1859 | 0.099 | 479    | ATPase, H+/K+ transporting, nongastric, alpha polypeptide                 |
| GO | nucleotide binding | 98 | 1859 | 0.099 | 4830   | non-metastatic cells 1, protein (NM23A) expressed in                      |
| GO | nucleotide binding | 98 | 1859 | 0.099 | 4893   | neuroblastoma RAS viral (v-ras) oncogene homolog                          |
| GO | nucleotide binding | 98 | 1859 | 0.099 | 5000   | origin recognition complex, subunit 4-like (yeast)                        |
| GO | nucleotide binding | 98 | 1859 | 0.099 | 50485  | SWI/SNF related, matrix associated, actin dependent regulator of chromati |
| GO | nucleotide binding | 98 | 1859 | 0.099 | 51062  | atlastin GTPase 1                                                         |
| GO | nucleotide binding | 98 | 1859 | 0.099 | 54822  | transient receptor potential cation channel, subfamily M, member 7        |
| GO | nucleotide binding | 98 | 1859 | 0.099 | 55137  | fidgetin                                                                  |
| GO | nucleotide binding | 98 | 1859 | 0.099 | 55207  | ADP-ribosylation factor-like 8B                                           |
| GO | nucleotide binding | 98 | 1859 | 0.099 | 55577  | N-acetylglucosamine kinase                                                |
| GO | nucleotide binding | 98 | 1859 | 0.099 | 55752  | septin 11                                                                 |
| GO | nucleotide binding | 98 | 1859 | 0.099 | 558    | AXL receptor tyrosine kinase                                              |
| GO | nucleotide binding | 98 | 1859 | 0.099 | 5588   | protein kinase C, theta                                                   |
| GO | nucleotide binding | 98 | 1859 | 0.099 | 5702   | proteasome (prosome, macropain) 26S subunit, ATPase, 3                    |
| GO | nucleotide binding | 98 | 1859 | 0.099 | 57144  | p21 protein (Cdc42/Rac)-activated kinase 7                                |
| GO | nucleotide binding | 98 | 1859 | 0.099 | 58155  | polypyrimidine tract binding protein 2                                    |
| GO | nucleotide binding | 98 | 1859 | 0.099 | 5889   | RAD51 homolog C (S. cerevisiae)                                           |
| GO | nucleotide binding | 98 | 1859 | 0.099 | 59     | actin, alpha 2, smooth muscle, aorta                                      |
| GO | nucleotide binding | 98 | 1859 | 0.099 | 5965   | RecQ protein-like (DNA helicase Q1-like)                                  |
| GO | nucleotide binding | 98 | 1859 | 0.099 | 6242   | rhotekin                                                                  |
| GO | nucleotide binding | 98 | 1859 | 0.099 | 64080  | ribokinase                                                                |
| GO | nucleotide binding | 98 | 1859 | 0.099 | 641    | Bloom syndrome, RecQ helicase-like                                        |
| GO | nucleotide binding | 98 | 1859 | 0.099 | 659    | bone morphogenetic protein receptor, type II (serine/threonine kinase)    |
| GO | nucleotide binding | 98 | 1859 | 0.099 | 6683   | spastin                                                                   |
| GO | nucleotide binding | 98 | 1859 | 0.099 | 6741   | Sjogren syndrome antigen B (autoantigen La)                               |
| GO | nucleotide binding | 98 | 1859 | 0.099 | 6833   | ATP-binding cassette, sub-family C (CFTR/MRP), member 8                   |

|    |                                       |    |      |       |        |                                                            |
|----|---------------------------------------|----|------|-------|--------|------------------------------------------------------------|
| GO | nucleotide binding                    | 98 | 1859 | 0.099 | 70     | actin, alpha, cardiac muscle 1                             |
| GO | nucleotide binding                    | 98 | 1859 | 0.099 | 7010   | TEK tyrosine kinase, endothelial                           |
| GO | nucleotide binding                    | 98 | 1859 | 0.099 | 7046   | transforming growth factor, beta receptor 1                |
| GO | nucleotide binding                    | 98 | 1859 | 0.099 | 7298   | thymidylate synthetase                                     |
| GO | nucleotide binding                    | 98 | 1859 | 0.099 | 7324   | ubiquitin-conjugating enzyme E2E 1 (UBC4/5 homolog, yeast) |
| GO | nucleotide binding                    | 98 | 1859 | 0.099 | 7846   | tubulin, alpha 1a                                          |
| GO | nucleotide binding                    | 98 | 1859 | 0.099 | 79646  | pantothenate kinase 3                                      |
| GO | nucleotide binding                    | 98 | 1859 | 0.099 | 79677  | structural maintenance of chromosomes 6                    |
| GO | nucleotide binding                    | 98 | 1859 | 0.099 | 79861  | tubulin, alpha-like 3                                      |
| GO | nucleotide binding                    | 98 | 1859 | 0.099 | 81892  | chromosome 14 open reading frame 156                       |
| GO | nucleotide binding                    | 98 | 1859 | 0.099 | 83871  | RAB34, member RAS oncogene family                          |
| GO | nucleotide binding                    | 98 | 1859 | 0.099 | 84083  | zinc finger, RAN-binding domain containing 3               |
| GO | nucleotide binding                    | 98 | 1859 | 0.099 | 84365  | MKI67 (FHA domain) interacting nucleolar phosphoprotein    |
| GO | nucleotide binding                    | 98 | 1859 | 0.099 | 8458   | transcription termination factor, RNA polymerase II        |
| GO | nucleotide binding                    | 98 | 1859 | 0.099 | 8536   | calcium/calmodulin-dependent protein kinase I              |
| GO | nucleotide binding                    | 98 | 1859 | 0.099 | 89797  | neuron navigator 2                                         |
| GO | nucleotide binding                    | 98 | 1859 | 0.099 | 8997   | kalirin, RhoGEF kinase                                     |
| GO | nucleotide binding                    | 98 | 1859 | 0.099 | 9262   | serine/threonine kinase 17b                                |
| GO | nucleotide binding                    | 98 | 1859 | 0.099 | 9448   | mitogen-activated protein kinase kinase kinase kinase 4    |
| GO | nucleotide binding                    | 98 | 1859 | 0.099 | 953    | ectonucleoside triphosphate diphosphohydrolase 1           |
| GO | nucleotide binding                    | 98 | 1859 | 0.099 | 9833   | maternal embryonic leucine zipper kinase                   |
| GO | lipid metabolic process               | 14 | 206  | 0.1   | 2171   | fatty acid binding protein 5 (psoriasis-associated)        |
| GO | lipid metabolic process               | 14 | 206  | 0.1   | 2172   | fatty acid binding protein 6, ileal                        |
| GO | lipid metabolic process               | 14 | 206  | 0.1   | 23305  | acyl-CoA synthetase long-chain family member 6             |
| GO | lipid metabolic process               | 14 | 206  | 0.1   | 26061  | 2-hydroxyacyl-CoA lyase 1                                  |
| GO | lipid metabolic process               | 14 | 206  | 0.1   | 3028   | hydroxysteroid (17-beta) dehydrogenase 10                  |
| GO | lipid metabolic process               | 14 | 206  | 0.1   | 3157   | 3-hydroxy-3-methylglutaryl-Coenzyme A synthase 1 (soluble) |
| GO | lipid metabolic process               | 14 | 206  | 0.1   | 3248   | hydroxyprostaglandin dehydrogenase 15-(NAD)                |
| GO | lipid metabolic process               | 14 | 206  | 0.1   | 341    | apolipoprotein C-I                                         |
| GO | lipid metabolic process               | 14 | 206  | 0.1   | 348    | apolipoprotein E                                           |
| GO | lipid metabolic process               | 14 | 206  | 0.1   | 3952   | leptin                                                     |
| GO | lipid metabolic process               | 14 | 206  | 0.1   | 5264   | phytanoyl-CoA 2-hydroxylase                                |
| GO | lipid metabolic process               | 14 | 206  | 0.1   | 5360   | phospholipid transfer protein                              |
| GO | lipid metabolic process               | 14 | 206  | 0.1   | 7840   | Alstrom syndrome 1                                         |
| GO | lipid metabolic process               | 14 | 206  | 0.1   | 9744   | ArfGAP with coiled-coil, ankyrin repeat and PH domains 1   |
| GO | voltage-gated potassium channel compl | 7  | 85   | 0.1   | 283518 | potassium channel regulator                                |

|    |                                         |   |    |       |       |                                                                          |
|----|-----------------------------------------|---|----|-------|-------|--------------------------------------------------------------------------|
| GO | voltage-gated potassium channel compl   | 7 | 85 | 0.1   | 3751  | potassium voltage-gated channel, Shal-related subfamily, member 2        |
| GO | voltage-gated potassium channel compl   | 7 | 85 | 0.1   | 3754  | potassium voltage-gated channel, subfamily F, member 1                   |
| GO | voltage-gated potassium channel compl   | 7 | 85 | 0.1   | 3756  | potassium voltage-gated channel, subfamily H (eag-related), member 1     |
| GO | voltage-gated potassium channel compl   | 7 | 85 | 0.1   | 3763  | potassium inwardly-rectifying channel, subfamily J, member 6             |
| GO | voltage-gated potassium channel compl   | 7 | 85 | 0.1   | 3778  | potassium large conductance calcium-activated channel, subfamily M, alph |
| GO | voltage-gated potassium channel compl   | 7 | 85 | 0.1   | 56479 | potassium voltage-gated channel, KQT-like subfamily, member 5            |
| GO | ligand-dependent nuclear receptor bind  | 2 | 12 | 0.105 | 10474 | transcriptional adaptor 3                                                |
| GO | ligand-dependent nuclear receptor bind  | 2 | 12 | 0.105 | 5469  | mediator complex subunit 1                                               |
| GO | tissue development                      | 2 | 12 | 0.105 | 10683 | delta-like 3 (Drosophila)                                                |
| GO | tissue development                      | 2 | 12 | 0.105 | 7490  | Wilms tumor 1                                                            |
| GO | dendrite morphogenesis                  | 2 | 12 | 0.105 | 1496  | catenin (cadherin-associated protein), alpha 2                           |
| GO | dendrite morphogenesis                  | 2 | 12 | 0.105 | 773   | calcium channel, voltage-dependent, P/Q type, alpha 1A subunit           |
| GO | release of sequestered calcium ion into | 2 | 12 | 0.105 | 2149  | coagulation factor II (thrombin) receptor                                |
| GO | release of sequestered calcium ion into | 2 | 12 | 0.105 | 3932  | lymphocyte-specific protein tyrosine kinase                              |
| GO | smooth muscle contraction               | 2 | 12 | 0.105 | 2281  | FK506 binding protein 1B, 12.6 kDa                                       |
| GO | smooth muscle contraction               | 2 | 12 | 0.105 | 6525  | smoothelin                                                               |
| GO | septin complex                          | 2 | 12 | 0.105 | 23157 | septin 6                                                                 |
| GO | septin complex                          | 2 | 12 | 0.105 | 55752 | septin 11                                                                |
| GO | mitochondrial inner membrane presequ    | 2 | 12 | 0.105 | 26519 | translocase of inner mitochondrial membrane 10 homolog (yeast)           |
| GO | mitochondrial inner membrane presequ    | 2 | 12 | 0.105 | 26521 | translocase of inner mitochondrial membrane 8 homolog B (yeast)          |
| GO | regulation of muscle contraction        | 2 | 12 | 0.105 | 309   | annexin A6                                                               |
| GO | regulation of muscle contraction        | 2 | 12 | 0.105 | 7168  | tropomyosin 1 (alpha)                                                    |
| GO | caspase inhibitor activity              | 2 | 12 | 0.105 | 332   | baculoviral IAP repeat-containing 5                                      |
| GO | caspase inhibitor activity              | 2 | 12 | 0.105 | 51499 | TP53 regulated inhibitor of apoptosis 1                                  |
| GO | low-density lipoprotein particle        | 2 | 12 | 0.105 | 348   | apolipoprotein E                                                         |
| GO | low-density lipoprotein particle        | 2 | 12 | 0.105 | 79135 | apolipoprotein O                                                         |
| GO | response to electrical stimulus         | 2 | 12 | 0.105 | 3763  | potassium inwardly-rectifying channel, subfamily J, member 6             |
| GO | response to electrical stimulus         | 2 | 12 | 0.105 | 7046  | transforming growth factor, beta receptor 1                              |
| GO | alpha-tubulin binding                   | 2 | 12 | 0.105 | 55207 | ADP-ribosylation factor-like 8B                                          |
| GO | alpha-tubulin binding                   | 2 | 12 | 0.105 | 6683  | spastin                                                                  |
| GO | response to chemical stimulus           | 2 | 12 | 0.105 | 6657  | SRY (sex determining region Y)-box 2                                     |
| GO | response to chemical stimulus           | 2 | 12 | 0.105 | 7353  | ubiquitin fusion degradation 1 like (yeast)                              |
| GO | ubiquitin ligase complex                | 5 | 54 | 0.105 | 23194 | F-box and leucine-rich repeat protein 7                                  |
| GO | ubiquitin ligase complex                | 5 | 54 | 0.105 | 26223 | F-box and leucine-rich repeat protein 21 (gene/pseudogene)               |
| GO | ubiquitin ligase complex                | 5 | 54 | 0.105 | 4734  | neural precursor cell expressed, developmentally down-regulated 4        |
| GO | ubiquitin ligase complex                | 5 | 54 | 0.105 | 672   | breast cancer 1, early onset                                             |

|    |                                               |    |     |       |        |                                                                              |
|----|-----------------------------------------------|----|-----|-------|--------|------------------------------------------------------------------------------|
| GO | ubiquitin ligase complex                      | 5  | 54  | 0.105 | 7324   | ubiquitin-conjugating enzyme E2E 1 (UBC4/5 homolog, yeast)                   |
| GO | androgen receptor signaling pathway           | 4  | 39  | 0.106 | 5469   | mediator complex subunit 1                                                   |
| GO | androgen receptor signaling pathway           | 4  | 39  | 0.106 | 56937  | prostate transmembrane protein, androgen induced 1                           |
| GO | androgen receptor signaling pathway           | 4  | 39  | 0.106 | 672    | breast cancer 1, early onset                                                 |
| GO | androgen receptor signaling pathway           | 4  | 39  | 0.106 | 898    | cyclin E1                                                                    |
| GO | response to antibiotic                        | 3  | 25  | 0.108 | 10096  | ARP3 actin-related protein 3 homolog (yeast)                                 |
| GO | response to antibiotic                        | 3  | 25  | 0.108 | 1543   | cytochrome P450, family 1, subfamily A, polypeptide 1                        |
| GO | response to antibiotic                        | 3  | 25  | 0.108 | 6347   | chemokine (C-C motif) ligand 2                                               |
| GO | nucleotide metabolic process                  | 3  | 25  | 0.108 | 11164  | nudix (nucleoside diphosphate linked moiety X)-type motif 5                  |
| GO | nucleotide metabolic process                  | 3  | 25  | 0.108 | 29922  | non-metastatic cells 7, protein expressed in (nucleoside-diphosphate kinase) |
| GO | nucleotide metabolic process                  | 3  | 25  | 0.108 | 4830   | non-metastatic cells 1, protein (NM23A) expressed in                         |
| GO | midbody                                       | 3  | 25  | 0.108 | 332    | baculoviral IAP repeat-containing 5                                          |
| GO | midbody                                       | 3  | 25  | 0.108 | 55207  | ADP-ribosylation factor-like 8B                                              |
| GO | midbody                                       | 3  | 25  | 0.108 | 6683   | spastin                                                                      |
| GO | protein polymerization                        | 3  | 25  | 0.108 | 347733 | tubulin, beta 2B                                                             |
| GO | protein polymerization                        | 3  | 25  | 0.108 | 7846   | tubulin, alpha 1a                                                            |
| GO | protein polymerization                        | 3  | 25  | 0.108 | 79861  | tubulin, alpha-like 3                                                        |
| GO | nucleotidyltransferase activity               | 6  | 71  | 0.112 | 23057  | nicotinamide nucleotide adenylyltransferase 2                                |
| GO | nucleotidyltransferase activity               | 6  | 71  | 0.112 | 25885  | polymerase (RNA) I polypeptide A, 194kDa                                     |
| GO | nucleotidyltransferase activity               | 6  | 71  | 0.112 | 5558   | primase, DNA, polypeptide 2 (58kDa)                                          |
| GO | nucleotidyltransferase activity               | 6  | 71  | 0.112 | 56655  | polymerase (DNA-directed), epsilon 4 (p12 subunit)                           |
| GO | nucleotidyltransferase activity               | 6  | 71  | 0.112 | 5833   | phosphate cytidylyltransferase 2, ethanolamine                               |
| GO | nucleotidyltransferase activity               | 6  | 71  | 0.112 | 84172  | polymerase (RNA) I polypeptide B, 128kDa                                     |
| GO | ubiquitin-dependent protein catabolic process | 10 | 139 | 0.113 | 10213  | proteasome (prosome, macropain) 26S subunit, non-ATPase, 14S                 |
| GO | ubiquitin-dependent protein catabolic process | 10 | 139 | 0.113 | 130507 | ubiquitin protein ligase E3 component n-recognin 3 (putative)                |
| GO | ubiquitin-dependent protein catabolic process | 10 | 139 | 0.113 | 23194  | F-box and leucine-rich repeat protein 7                                      |
| GO | ubiquitin-dependent protein catabolic process | 10 | 139 | 0.113 | 26263  | F-box protein 22                                                             |
| GO | ubiquitin-dependent protein catabolic process | 10 | 139 | 0.113 | 373856 | ubiquitin specific peptidase 41                                              |
| GO | ubiquitin-dependent protein catabolic process | 10 | 139 | 0.113 | 57478  | ubiquitin specific peptidase 31                                              |
| GO | ubiquitin-dependent protein catabolic process | 10 | 139 | 0.113 | 7324   | ubiquitin-conjugating enzyme E2E 1 (UBC4/5 homolog, yeast)                   |
| GO | ubiquitin-dependent protein catabolic process | 10 | 139 | 0.113 | 7347   | ubiquitin carboxyl-terminal esterase L3 (ubiquitin thiolesterase)            |
| GO | ubiquitin-dependent protein catabolic process | 10 | 139 | 0.113 | 7353   | ubiquitin fusion degradation 1 like (yeast)                                  |
| GO | ubiquitin-dependent protein catabolic process | 10 | 139 | 0.113 | 84101  | ubiquitin specific peptidase 44                                              |
| GO | enzyme activator activity                     | 4  | 40  | 0.113 | 10055  | SUMO1 activating enzyme subunit 1                                            |
| GO | enzyme activator activity                     | 4  | 40  | 0.113 | 10893  | matrix metalloproteinase 24 (membrane-inserted)                              |
| GO | enzyme activator activity                     | 4  | 40  | 0.113 | 241    | arachidonate 5-lipoxygenase-activating protein                               |

|    |                                              |   |    |       |        |                                                                          |
|----|----------------------------------------------|---|----|-------|--------|--------------------------------------------------------------------------|
| GO | enzyme activator activity                    | 4 | 40 | 0.113 | 9535   | glia maturation factor, gamma                                            |
| GO | embryonic development                        | 6 | 72 | 0.117 | 130507 | ubiquitin protein ligase E3 component n-recognin 3 (putative)            |
| GO | embryonic development                        | 6 | 72 | 0.117 | 2628   | glycine amidinotransferase (L-arginine:glycine amidinotransferase)       |
| GO | embryonic development                        | 6 | 72 | 0.117 | 7046   | transforming growth factor, beta receptor 1                              |
| GO | embryonic development                        | 6 | 72 | 0.117 | 84172  | polymerase (RNA) I polypeptide B, 128kDa                                 |
| GO | embryonic development                        | 6 | 72 | 0.117 | 8788   | delta-like 1 homolog (Drosophila)                                        |
| GO | embryonic development                        | 6 | 72 | 0.117 | 9542   | neuregulin 2                                                             |
| GO | response to nutrient                         | 6 | 72 | 0.117 | 23305  | acyl-CoA synthetase long-chain family member 6                           |
| GO | response to nutrient                         | 6 | 72 | 0.117 | 2628   | glycine amidinotransferase (L-arginine:glycine amidinotransferase)       |
| GO | response to nutrient                         | 6 | 72 | 0.117 | 411    | arylsulfatase B                                                          |
| GO | response to nutrient                         | 6 | 72 | 0.117 | 590    | butyrylcholinesterase                                                    |
| GO | response to nutrient                         | 6 | 72 | 0.117 | 6546   | solute carrier family 8 (sodium/calcium exchanger), member 1             |
| GO | response to nutrient                         | 6 | 72 | 0.117 | 7037   | transferrin receptor (p90, CD71)                                         |
| GO | embryo implantation                          | 3 | 26 | 0.118 | 5125   | proprotein convertase subtilisin/kexin type 5                            |
| GO | embryo implantation                          | 3 | 26 | 0.118 | 7046   | transforming growth factor, beta receptor 1                              |
| GO | embryo implantation                          | 3 | 26 | 0.118 | 84172  | polymerase (RNA) I polypeptide B, 128kDa                                 |
| GO | cellular response to hormone stimulus        | 3 | 26 | 0.118 | 5228   | placental growth factor                                                  |
| GO | cellular response to hormone stimulus        | 3 | 26 | 0.118 | 6586   | slit homolog 3 (Drosophila)                                              |
| GO | cellular response to hormone stimulus        | 3 | 26 | 0.118 | 8835   | suppressor of cytokine signaling 2                                       |
| GO | negative regulation of phosphorylation       | 2 | 13 | 0.12  | 1026   | cyclin-dependent kinase inhibitor 1A (p21, Cip1)                         |
| GO | negative regulation of phosphorylation       | 2 | 13 | 0.12  | 3624   | inhibin, beta A                                                          |
| GO | acetylcholine receptor activity              | 2 | 13 | 0.12  | 1136   | cholinergic receptor, nicotinic, alpha 3                                 |
| GO | acetylcholine receptor activity              | 2 | 13 | 0.12  | 1138   | cholinergic receptor, nicotinic, alpha 5                                 |
| GO | protein autoubiquitination                   | 2 | 13 | 0.12  | 1161   | excision repair cross-complementing rodent repair deficiency, complement |
| GO | protein autoubiquitination                   | 2 | 13 | 0.12  | 1643   | damage-specific DNA binding protein 2, 48kDa                             |
| GO | oogenesis                                    | 2 | 13 | 0.12  | 1730   | diaphanous homolog 2 (Drosophila)                                        |
| GO | oogenesis                                    | 2 | 13 | 0.12  | 4292   | mutL homolog 1, colon cancer, nonpolyposis type 2 (E. coli)              |
| GO | embryonic cranial skeleton morphogenesis     | 2 | 13 | 0.12  | 1746   | distal-less homeobox 2                                                   |
| GO | embryonic cranial skeleton morphogenesis     | 2 | 13 | 0.12  | 7046   | transforming growth factor, beta receptor 1                              |
| GO | synaptic transmission, glutamatergic         | 2 | 13 | 0.12  | 2906   | glutamate receptor, ionotropic, N-methyl D-aspartate 2D                  |
| GO | synaptic transmission, glutamatergic         | 2 | 13 | 0.12  | 773    | calcium channel, voltage-dependent, P/Q type, alpha 1A subunit           |
| GO | high-density lipoprotein particle remodeling | 2 | 13 | 0.12  | 341    | apolipoprotein C-I                                                       |
| GO | high-density lipoprotein particle remodeling | 2 | 13 | 0.12  | 348    | apolipoprotein E                                                         |
| GO | hormone metabolic process                    | 2 | 13 | 0.12  | 3952   | leptin                                                                   |
| GO | hormone metabolic process                    | 2 | 13 | 0.12  | 773    | calcium channel, voltage-dependent, P/Q type, alpha 1A subunit           |
| GO | myosin binding                               | 2 | 13 | 0.12  | 54822  | transient receptor potential cation channel, subfamily M, member 7       |



|    |                                           |    |     |       |        |                                                                                  |
|----|-------------------------------------------|----|-----|-------|--------|----------------------------------------------------------------------------------|
| GO | myosin binding                            | 2  | 13  | 0.12  | 70     | actin, alpha, cardiac muscle 1                                                   |
| GO | positive regulation of stress fiber assem | 2  | 13  | 0.12  | 5588   | protein kinase C, theta                                                          |
| GO | positive regulation of stress fiber assem | 2  | 13  | 0.12  | 7168   | tropomyosin 1 (alpha)                                                            |
| GO | centrosome organization                   | 2  | 13  | 0.12  | 8409   | ubiquitously-expressed transcript                                                |
| GO | centrosome organization                   | 2  | 13  | 0.12  | 93323  | HAUS augmin-like complex, subunit 8                                              |
| GO | coated pit                                | 4  | 41  | 0.121 | 11154  | adaptor-related protein complex 4, sigma 1 subunit                               |
| GO | coated pit                                | 4  | 41  | 0.121 | 409    | arrestin, beta 2                                                                 |
| GO | coated pit                                | 4  | 41  | 0.121 | 7037   | transferrin receptor (p90, CD71)                                                 |
| GO | coated pit                                | 4  | 41  | 0.121 | 8905   | adaptor-related protein complex 1, sigma 2 subunit                               |
| GO | myosin complex                            | 4  | 41  | 0.121 | 11259  | filamin A interacting protein 1-like                                             |
| GO | myosin complex                            | 4  | 41  | 0.121 | 4430   | myosin IB                                                                        |
| GO | myosin complex                            | 4  | 41  | 0.121 | 4637   | myosin, light chain 6, alkali, smooth muscle and non-muscle                      |
| GO | myosin complex                            | 4  | 41  | 0.121 | 4651   | myosin X                                                                         |
| GO | magnesium ion binding                     | 11 | 159 | 0.122 | 10056  | phenylalanyl-tRNA synthetase, beta subunit                                       |
| GO | magnesium ion binding                     | 11 | 159 | 0.122 | 11164  | nudix (nucleoside diphosphate linked moiety X)-type motif 5                      |
| GO | magnesium ion binding                     | 11 | 159 | 0.122 | 147699 | protein phosphatase, Mg <sup>2+</sup> /Mn <sup>2+</sup> dependent, 1N (putative) |
| GO | magnesium ion binding                     | 11 | 159 | 0.122 | 2027   | enolase 3 (beta, muscle)                                                         |
| GO | magnesium ion binding                     | 11 | 159 | 0.122 | 2139   | eyes absent homolog 2 (Drosophila)                                               |
| GO | magnesium ion binding                     | 11 | 159 | 0.122 | 2237   | flap structure-specific endonuclease 1                                           |
| GO | magnesium ion binding                     | 11 | 159 | 0.122 | 26061  | 2-hydroxyacyl-CoA lyase 1                                                        |
| GO | magnesium ion binding                     | 11 | 159 | 0.122 | 27330  | ribosomal protein S6 kinase, 90kDa, polypeptide 6                                |
| GO | magnesium ion binding                     | 11 | 159 | 0.122 | 4436   | mutS homolog 2, colon cancer, nonpolyposis type 1 (E. coli)                      |
| GO | magnesium ion binding                     | 11 | 159 | 0.122 | 4830   | non-metastatic cells 1, protein (NM23A) expressed in                             |
| GO | magnesium ion binding                     | 11 | 159 | 0.122 | 5494   | protein phosphatase, Mg <sup>2+</sup> /Mn <sup>2+</sup> dependent, 1A            |
| GO | nucleolus                                 | 39 | 692 | 0.122 | 10189  | THO complex 4                                                                    |
| GO | nucleolus                                 | 39 | 692 | 0.122 | 10199  | M-phase phosphoprotein 10 (U3 small nucleolar ribonucleoprotein)                 |
| GO | nucleolus                                 | 39 | 692 | 0.122 | 10528  | NOP56 ribonucleoprotein homolog (yeast)                                          |
| GO | nucleolus                                 | 39 | 692 | 0.122 | 10656  | KH domain containing, RNA binding, signal transduction associated 3              |
| GO | nucleolus                                 | 39 | 692 | 0.122 | 10799  | ribonuclease P/MRP 40kDa subunit                                                 |
| GO | nucleolus                                 | 39 | 692 | 0.122 | 11056  | DEAD (Asp-Glu-Ala-Asp) box polypeptide 52                                        |
| GO | nucleolus                                 | 39 | 692 | 0.122 | 11169  | WD repeat and HMG-box DNA binding protein 1                                      |
| GO | nucleolus                                 | 39 | 692 | 0.122 | 201299 | RAD52 motif 1                                                                    |
| GO | nucleolus                                 | 39 | 692 | 0.122 | 219736 | storkhead box 1                                                                  |
| GO | nucleolus                                 | 39 | 692 | 0.122 | 25885  | polymerase (RNA) I polypeptide A, 194kDa                                         |
| GO | nucleolus                                 | 39 | 692 | 0.122 | 25926  | nucleolar protein 11                                                             |
| GO | nucleolus                                 | 39 | 692 | 0.122 | 2842   | G protein-coupled receptor 19                                                    |

|    |                                     |    |     |       |                                                                                  |
|----|-------------------------------------|----|-----|-------|----------------------------------------------------------------------------------|
| GO | nucleolus                           | 39 | 692 | 0.122 | 30011 SH3-domain kinase binding protein 1                                        |
| GO | nucleolus                           | 39 | 692 | 0.122 | 3248 hydroxyprostaglandin dehydrogenase 15-(NAD)                                 |
| GO | nucleolus                           | 39 | 692 | 0.122 | 332 baculoviral IAP repeat-containing 5                                          |
| GO | nucleolus                           | 39 | 692 | 0.122 | 345630 fibrillarin-like 1                                                        |
| GO | nucleolus                           | 39 | 692 | 0.122 | 3516 recombination signal binding protein for immunoglobulin kappa J region      |
| GO | nucleolus                           | 39 | 692 | 0.122 | 4291 myeloid leukemia factor 1                                                   |
| GO | nucleolus                           | 39 | 692 | 0.122 | 4603 v-myb myeloblastosis viral oncogene homolog (avian)-like 1                  |
| GO | nucleolus                           | 39 | 692 | 0.122 | 51339 dapper, antagonist of beta-catenin, homolog 1 ( <i>Xenopus laevis</i> )    |
| GO | nucleolus                           | 39 | 692 | 0.122 | 51491 NOP16 nucleolar protein homolog (yeast)                                    |
| GO | nucleolus                           | 39 | 692 | 0.122 | 5303 protein (peptidylprolyl cis/trans isomerase) NIMA-interacting, 4 (parvulin) |
| GO | nucleolus                           | 39 | 692 | 0.122 | 54984 PIN2-interacting protein 1                                                 |
| GO | nucleolus                           | 39 | 692 | 0.122 | 55003 PAK1 interacting protein 1                                                 |
| GO | nucleolus                           | 39 | 692 | 0.122 | 55759 WD repeat domain 12                                                        |
| GO | nucleolus                           | 39 | 692 | 0.122 | 56902 partner of NOB1 homolog ( <i>S. cerevisiae</i> )                           |
| GO | nucleolus                           | 39 | 692 | 0.122 | 6133 ribosomal protein L9                                                        |
| GO | nucleolus                           | 39 | 692 | 0.122 | 641 Bloom syndrome, RecQ helicase-like                                           |
| GO | nucleolus                           | 39 | 692 | 0.122 | 64318 nucleolar complex associated 3 homolog ( <i>S. cerevisiae</i> )            |
| GO | nucleolus                           | 39 | 692 | 0.122 | 64393 zinc finger, matrin type 3                                                 |
| GO | nucleolus                           | 39 | 692 | 0.122 | 64782 apoptosis enhancing nuclease                                               |
| GO | nucleolus                           | 39 | 692 | 0.122 | 6662 SRY (sex determining region Y)-box 9                                        |
| GO | nucleolus                           | 39 | 692 | 0.122 | 6672 SP100 nuclear antigen                                                       |
| GO | nucleolus                           | 39 | 692 | 0.122 | 6711 spectrin, beta, non-erythrocytic 1                                          |
| GO | nucleolus                           | 39 | 692 | 0.122 | 6741 Sjogren syndrome antigen B (autoantigen La)                                 |
| GO | nucleolus                           | 39 | 692 | 0.122 | 84172 polymerase (RNA) I polypeptide B, 128kDa                                   |
| GO | nucleolus                           | 39 | 692 | 0.122 | 84365 MKI67 (FHA domain) interacting nucleolar phosphoprotein                    |
| GO | nucleolus                           | 39 | 692 | 0.122 | 89797 neuron navigator 2                                                         |
| GO | nucleolus                           | 39 | 692 | 0.122 | 898 cyclin E1                                                                    |
| GO | integrin-mediated signaling pathway | 5  | 57  | 0.124 | 22801 integrin, alpha 11                                                         |
| GO | integrin-mediated signaling pathway | 5  | 57  | 0.124 | 3685 integrin, alpha V (vitronectin receptor, alpha polypeptide, antigen CD51)   |
| GO | integrin-mediated signaling pathway | 5  | 57  | 0.124 | 3694 integrin, beta 6                                                            |
| GO | integrin-mediated signaling pathway | 5  | 57  | 0.124 | 5341 pleckstrin                                                                  |
| GO | integrin-mediated signaling pathway | 5  | 57  | 0.124 | 667 dystonin                                                                     |
| GO | protein complex binding             | 7  | 90  | 0.125 | 1000 cadherin 2, type 1, N-cadherin (neuronal)                                   |
| GO | protein complex binding             | 7  | 90  | 0.125 | 1026 cyclin-dependent kinase inhibitor 1A (p21, Cip1)                            |
| GO | protein complex binding             | 7  | 90  | 0.125 | 1161 excision repair cross-complementing rodent repair deficiency, complement    |
| GO | protein complex binding             | 7  | 90  | 0.125 | 3516 recombination signal binding protein for immunoglobulin kappa J region      |

|    |                                        |   |    |       |                                                                               |
|----|----------------------------------------|---|----|-------|-------------------------------------------------------------------------------|
| GO | protein complex binding                | 7 | 90 | 0.125 | 6711 spectrin, beta, non-erythrocytic 1                                       |
| GO | protein complex binding                | 7 | 90 | 0.125 | 7046 transforming growth factor, beta receptor 1                              |
| GO | protein complex binding                | 7 | 90 | 0.125 | 898 cyclin E1                                                                 |
| GO | neuron development                     | 3 | 27 | 0.128 | 23305 acyl-CoA synthetase long-chain family member 6                          |
| GO | neuron development                     | 3 | 27 | 0.128 | 2736 GLI family zinc finger 2                                                 |
| GO | neuron development                     | 3 | 27 | 0.128 | 27429 HtrA serine peptidase 2                                                 |
| GO | kinase binding                         | 3 | 27 | 0.128 | 25780 RAS guanyl releasing protein 3 (calcium and DAG-regulated)              |
| GO | kinase binding                         | 3 | 27 | 0.128 | 355 Fas (TNF receptor superfamily, member 6)                                  |
| GO | kinase binding                         | 3 | 27 | 0.128 | 6672 SP100 nuclear antigen                                                    |
| GO | ATP synthesis coupled proton transport | 3 | 27 | 0.128 | 51382 ATPase, H+ transporting, lysosomal 34kDa, V1 subunit D                  |
| GO | ATP synthesis coupled proton transport | 3 | 27 | 0.128 | 516 ATP synthase, H+ transporting, mitochondrial F0 complex, subunit C1 (subu |
| GO | ATP synthesis coupled proton transport | 3 | 27 | 0.128 | 528 ATPase, H+ transporting, lysosomal 42kDa, V1 subunit C1                   |
| GO | JAK-STAT cascade                       | 3 | 27 | 0.128 | 6347 chemokine (C-C motif) ligand 2                                           |
| GO | JAK-STAT cascade                       | 3 | 27 | 0.128 | 729230 chemokine (C-C motif) receptor 2                                       |
| GO | JAK-STAT cascade                       | 3 | 27 | 0.128 | 8835 suppressor of cytokine signaling 2                                       |
| GO | vasculogenesis                         | 4 | 42 | 0.129 | 10052 gap junction protein, gamma 1, 45kDa                                    |
| GO | vasculogenesis                         | 4 | 42 | 0.129 | 5795 protein tyrosine phosphatase, receptor type, J                           |
| GO | vasculogenesis                         | 4 | 42 | 0.129 | 7137 troponin I type 3 (cardiac)                                              |
| GO | vasculogenesis                         | 4 | 42 | 0.129 | 7490 Wilms tumor 1                                                            |
| GO | negative regulation of cell growth     | 7 | 91 | 0.13  | 1026 cyclin-dependent kinase inhibitor 1A (p21, Cip1)                         |
| GO | negative regulation of cell growth     | 7 | 91 | 0.13  | 2786 guanine nucleotide binding protein (G protein), gamma 4                  |
| GO | negative regulation of cell growth     | 7 | 91 | 0.13  | 3624 inhibin, beta A                                                          |
| GO | negative regulation of cell growth     | 7 | 91 | 0.13  | 6586 slit homolog 3 (Drosophila)                                              |
| GO | negative regulation of cell growth     | 7 | 91 | 0.13  | 659 bone morphogenetic protein receptor, type II (serine/threonine kinase)    |
| GO | negative regulation of cell growth     | 7 | 91 | 0.13  | 7490 Wilms tumor 1                                                            |
| GO | negative regulation of cell growth     | 7 | 91 | 0.13  | 8626 tumor protein p63                                                        |
| GO | synaptosome                            | 7 | 91 | 0.13  | 23705 cell adhesion molecule 1                                                |
| GO | synaptosome                            | 7 | 91 | 0.13  | 26059 ELKS/RAB6-interacting/CAST family member 2                              |
| GO | synaptosome                            | 7 | 91 | 0.13  | 26999 cytoplasmic FMR1 interacting protein 2                                  |
| GO | synaptosome                            | 7 | 91 | 0.13  | 2906 glutamate receptor, ionotropic, N-methyl D-aspartate 2D                  |
| GO | synaptosome                            | 7 | 91 | 0.13  | 30011 SH3-domain kinase binding protein 1                                     |
| GO | synaptosome                            | 7 | 91 | 0.13  | 3751 potassium voltage-gated channel, Shal-related subfamily, member 2        |
| GO | synaptosome                            | 7 | 91 | 0.13  | 8777 multiple PDZ domain protein                                              |
| GO | microtubule binding                    | 5 | 58 | 0.131 | 220134 spindle and kinetochore associated complex subunit 1                   |
| GO | microtubule binding                    | 5 | 58 | 0.131 | 332 baculoviral IAP repeat-containing 5                                       |
| GO | microtubule binding                    | 5 | 58 | 0.131 | 6683 spastin                                                                  |

|    |                                            |   |    |       |        |                                                                          |
|----|--------------------------------------------|---|----|-------|--------|--------------------------------------------------------------------------|
| GO | microtubule binding                        | 5 | 58 | 0.131 | 79929  | MAP6 domain containing 1                                                 |
| GO | microtubule binding                        | 5 | 58 | 0.131 | 8409   | ubiquitously-expressed transcript                                        |
| GO | cholesterol metabolic process              | 5 | 58 | 0.131 | 2232   | ferredoxin reductase                                                     |
| GO | cholesterol metabolic process              | 5 | 58 | 0.131 | 341    | apolipoprotein C-I                                                       |
| GO | cholesterol metabolic process              | 5 | 58 | 0.131 | 348    | apolipoprotein E                                                         |
| GO | cholesterol metabolic process              | 5 | 58 | 0.131 | 3952   | leptin                                                                   |
| GO | cholesterol metabolic process              | 5 | 58 | 0.131 | 9420   | cytochrome P450, family 7, subfamily B, polypeptide 1                    |
| GO | positive regulation of lamellipodium ass   | 1 | 3  | 0.133 | 10096  | ARP3 actin-related protein 3 homolog (yeast)                             |
| GO | carbonyl reductase (NADPH) activity        | 1 | 3  | 0.133 | 10202  | dehydrogenase/reductase (SDR family) member 2                            |
| GO | negative regulation of stress fiber assen  | 1 | 3  | 0.133 | 10395  | deleted in liver cancer 1                                                |
| GO | U4/U6 snRNP                                | 1 | 3  | 0.133 | 10465  | peptidylprolyl isomerase H (cyclophilin H)                               |
| GO | limb bud formation                         | 1 | 3  | 0.133 | 10512  | sema domain, immunoglobulin domain (Ig), short basic domain, secreted, ( |
| GO | regulation of Rac GTPase activity          | 1 | 3  | 0.133 | 11149  | blood vessel epicardial substance                                        |
| GO | ADP-ribose diphosphatase activity          | 1 | 3  | 0.133 | 11164  | nudix (nucleoside diphosphate linked moiety X)-type motif 5              |
| GO | cohesin complex                            | 1 | 3  | 0.133 | 113130 | cell division cycle associated 5                                         |
| GO | interphase of mitotic cell cycle           | 1 | 3  | 0.133 | 113130 | cell division cycle associated 5                                         |
| GO | synaptic transmission involved in micturi  | 1 | 3  | 0.133 | 1136   | cholinergic receptor, nicotinic, alpha 3                                 |
| GO | nucleotide-excision repair complex         | 1 | 3  | 0.133 | 1161   | excision repair cross-complementing rodent repair deficiency, complement |
| GO | proteoglycan binding                       | 1 | 3  | 0.133 | 1289   | collagen, type V, alpha 1                                                |
| GO | lipase activity                            | 1 | 3  | 0.133 | 13     | arylacetamide deacetylase (esterase)                                     |
| GO | serine hydrolase activity                  | 1 | 3  | 0.133 | 13     | arylacetamide deacetylase (esterase)                                     |
| GO | negative regulation of nuclear mRNA sp     | 1 | 3  | 0.133 | 135295 | splicing factor, arginine/serine-rich 13B                                |
| GO | NEDD8 ligase activity                      | 1 | 3  | 0.133 | 140739 | ubiquitin-conjugating enzyme E2F (putative)                              |
| GO | positive regulation of vascular permeab    | 1 | 3  | 0.133 | 143282 | fibroblast growth factor binding protein 3                               |
| GO | porphyrin metabolic process                | 1 | 3  | 0.133 | 1543   | cytochrome P450, family 1, subfamily A, polypeptide 1                    |
| GO | positive regulation of S phase of mitotic  | 1 | 3  | 0.133 | 1543   | cytochrome P450, family 1, subfamily A, polypeptide 1                    |
| GO | response to nematode                       | 1 | 3  | 0.133 | 1543   | cytochrome P450, family 1, subfamily A, polypeptide 1                    |
| GO | AMP biosynthetic process                   | 1 | 3  | 0.133 | 158    | adenylosuccinate lyase                                                   |
| GO | thyroxine 5'-deiodinase activity           | 1 | 3  | 0.133 | 1733   | deiodinase, iodothyronine, type I                                        |
| GO | DNA methylation involved in embryonic      | 1 | 3  | 0.133 | 1788   | DNA (cytosine-5-)-methyltransferase 3 alpha                              |
| GO | S-adenosylmethioninamine metabolic p       | 1 | 3  | 0.133 | 1788   | DNA (cytosine-5-)-methyltransferase 3 alpha                              |
| GO | positive regulation of translational elonq | 1 | 3  | 0.133 | 1984   | eukaryotic translation initiation factor 5A                              |
| GO | positive regulation of translational term  | 1 | 3  | 0.133 | 1984   | eukaryotic translation initiation factor 5A                              |
| GO | translational frameshifting                | 1 | 3  | 0.133 | 1984   | eukaryotic translation initiation factor 5A                              |
| GO | UDP-N-acetylgalactosamine metabolic p      | 1 | 3  | 0.133 | 2135   | exostoses (multiple)-like 2                                              |
| GO | histone dephosphorylation                  | 1 | 3  | 0.133 | 2139   | eyes absent homolog 2 (Drosophila)                                       |

|    |                                                 |   |   |       |       |                                                                                    |
|----|-------------------------------------------------|---|---|-------|-------|------------------------------------------------------------------------------------|
| GO | connective tissue replacement during in         | 1 | 3 | 0.133 | 2149  | coagulation factor II (thrombin) receptor                                          |
| GO | regulation of interleukin-1 beta product        | 1 | 3 | 0.133 | 2149  | coagulation factor II (thrombin) receptor                                          |
| GO | STAT protein nuclear translocation              | 1 | 3 | 0.133 | 2149  | coagulation factor II (thrombin) receptor                                          |
| GO | tyrosine phosphorylation of STAT protei         | 1 | 3 | 0.133 | 2149  | coagulation factor II (thrombin) receptor                                          |
| GO | thyroid hormone binding                         | 1 | 3 | 0.133 | 220   | aldehyde dehydrogenase 1 family, member A3                                         |
| GO | substrate-bound cell migration                  | 1 | 3 | 0.133 | 22801 | integrin, alpha 11                                                                 |
| GO | negative regulation of heart rate               | 1 | 3 | 0.133 | 2281  | FK506 binding protein 1B, 12.6 kDa                                                 |
| GO | negative regulation of stress-activated $\beta$ | 1 | 3 | 0.133 | 2305  | forkhead box M1                                                                    |
| GO | regulation of oxygen and reactive oxyge         | 1 | 3 | 0.133 | 2305  | forkhead box M1                                                                    |
| GO | nicotinamide-nucleotide adenylyltransfe         | 1 | 3 | 0.133 | 23057 | nicotinamide nucleotide adenylyltransferase 2                                      |
| GO | nicotinate-nucleotide adenylyltransfera         | 1 | 3 | 0.133 | 23057 | nicotinamide nucleotide adenylyltransferase 2                                      |
| GO | glycerol-3-phosphate dehydrogenase (N           | 1 | 3 | 0.133 | 23171 | glycerol-3-phosphate dehydrogenase 1-like                                          |
| GO | glycerol-3-phosphate dehydrogenase cc           | 1 | 3 | 0.133 | 23171 | glycerol-3-phosphate dehydrogenase 1-like                                          |
| GO | intracellular receptor mediated signalin        | 1 | 3 | 0.133 | 2321  | fms-related tyrosine kinase 1 (vascular endothelial growth factor/vascular $\beta$ |
| GO | susceptibility to natural killer cell media     | 1 | 3 | 0.133 | 23705 | cell adhesion molecule 1                                                           |
| GO | cellular response to calcium ion                | 1 | 3 | 0.133 | 241   | arachidonate 5-lipoxygenase-activating protein                                     |
| GO | Rap GTPase activator activity                   | 1 | 3 | 0.133 | 25780 | RAS guanyl releasing protein 3 (calcium and DAG-regulated)                         |
| GO | de novo' IMP biosynthetic process               | 1 | 3 | 0.133 | 2618  | phosphoribosylglycinamide formyltransferase, phosphoribosylglycinamide             |
| GO | organ development                               | 1 | 3 | 0.133 | 2618  | phosphoribosylglycinamide formyltransferase, phosphoribosylglycinamide             |
| GO | cerebellar cortex morphogenesis                 | 1 | 3 | 0.133 | 2736  | GLI family zinc finger 2                                                           |
| GO | epidermal cell differentiation                  | 1 | 3 | 0.133 | 2736  | GLI family zinc finger 2                                                           |
| GO | smoothened signaling pathway involvec           | 1 | 3 | 0.133 | 2736  | GLI family zinc finger 2                                                           |
| GO | tube development                                | 1 | 3 | 0.133 | 2736  | GLI family zinc finger 2                                                           |
| GO | ventral midline development                     | 1 | 3 | 0.133 | 2736  | GLI family zinc finger 2                                                           |
| GO | response to molecule of fungal origin           | 1 | 3 | 0.133 | 2878  | glutathione peroxidase 3 (plasma)                                                  |
| GO | salivary gland development                      | 1 | 3 | 0.133 | 29842 | transcription factor CP2-like 1                                                    |
| GO | hyaluronan synthase activity                    | 1 | 3 | 0.133 | 3037  | hyaluronan synthase 2                                                              |
| GO | peripheral nervous system neuron deve           | 1 | 3 | 0.133 | 3236  | homeobox D10                                                                       |
| GO | spinal cord motor neuron cell fate speci        | 1 | 3 | 0.133 | 3236  | homeobox D10                                                                       |
| GO | chromosome passenger complex                    | 1 | 3 | 0.133 | 332   | baculoviral IAP repeat-containing 5                                                |
| GO | cobalt ion binding                              | 1 | 3 | 0.133 | 332   | baculoviral IAP repeat-containing 5                                                |
| GO | lipase inhibitor activity                       | 1 | 3 | 0.133 | 341   | apolipoprotein C-I                                                                 |
| GO | negative regulation of cholesterol transp       | 1 | 3 | 0.133 | 341   | apolipoprotein C-I                                                                 |
| GO | negative regulation of lipid metabolic pr       | 1 | 3 | 0.133 | 341   | apolipoprotein C-I                                                                 |
| GO | negative regulation of very-low-density         | 1 | 3 | 0.133 | 341   | apolipoprotein C-I                                                                 |
| GO | intermediate-density lipoprotein particl        | 1 | 3 | 0.133 | 348   | apolipoprotein E                                                                   |

|    |                                                                  |   |   |       |        |                                                                           |
|----|------------------------------------------------------------------|---|---|-------|--------|---------------------------------------------------------------------------|
| GO | negative regulation of cholesterol biosynthesis                  | 1 | 3 | 0.133 | 348    | apolipoprotein E                                                          |
| GO | very-low-density lipoprotein receptor binding                    | 1 | 3 | 0.133 | 348    | apolipoprotein E                                                          |
| GO | negative regulation of smooth muscle contraction                 | 1 | 3 | 0.133 | 3516   | recombination signal binding protein for immunoglobulin kappa J region    |
| GO | positive regulation of necrotic cell death                       | 1 | 3 | 0.133 | 355    | Fas (TNF receptor superfamily, member 6)                                  |
| GO | negative regulation of B cell differentiation                    | 1 | 3 | 0.133 | 3624   | inhibin, beta A                                                           |
| GO | negative regulation of interferon-gamma production               | 1 | 3 | 0.133 | 3624   | inhibin, beta A                                                           |
| GO | positive regulation of follicle-stimulating hormone release      | 1 | 3 | 0.133 | 3624   | inhibin, beta A                                                           |
| GO | negative regulation of low-density lipoprotein receptor activity | 1 | 3 | 0.133 | 3685   | integrin, alpha V (vitronectin receptor, alpha polypeptide, antigen CD51) |
| GO | A-type (transient outward) potassium channel activity            | 1 | 3 | 0.133 | 3751   | potassium voltage-gated channel, Shal-related subfamily, member 2         |
| GO | locomotor rhythm                                                 | 1 | 3 | 0.133 | 3778   | potassium large conductance calcium-activated channel, subfamily M, alpha |
| GO | relaxation of vascular smooth muscle                             | 1 | 3 | 0.133 | 3778   | potassium large conductance calcium-activated channel, subfamily M, alpha |
| GO | miRNA catabolic process                                          | 1 | 3 | 0.133 | 389421 | lin-28 homolog B (C. elegans)                                             |
| GO | positive regulation of T cell receptor signaling pathway         | 1 | 3 | 0.133 | 3932   | lymphocyte-specific protein tyrosine kinase                               |
| GO | phagocytic cup                                                   | 1 | 3 | 0.133 | 3936   | lymphocyte cytosolic protein 1 (L-plastin)                                |
| GO | T cell activation during immune response                         | 1 | 3 | 0.133 | 3936   | lymphocyte cytosolic protein 1 (L-plastin)                                |
| GO | regulation of gluconeogenesis                                    | 1 | 3 | 0.133 | 3952   | leptin                                                                    |
| GO | aryl hydrocarbon receptor binding                                | 1 | 3 | 0.133 | 406    | aryl hydrocarbon receptor nuclear translocator-like                       |
| GO | desensitization of G-protein coupled receptor                    | 1 | 3 | 0.133 | 409    | arrestin, beta 2                                                          |
| GO | myeloid progenitor cell differentiation                          | 1 | 3 | 0.133 | 4291   | myeloid leukemia factor 1                                                 |
| GO | dinucleotide insertion or deletion binding                       | 1 | 3 | 0.133 | 4436   | mutS homolog 2, colon cancer, nonpolyposis type 1 (E. coli)               |
| GO | four-way junction DNA binding                                    | 1 | 3 | 0.133 | 4436   | mutS homolog 2, colon cancer, nonpolyposis type 1 (E. coli)               |
| GO | maintenance of DNA repeat elements                               | 1 | 3 | 0.133 | 4436   | mutS homolog 2, colon cancer, nonpolyposis type 1 (E. coli)               |
| GO | oxidized purine DNA binding                                      | 1 | 3 | 0.133 | 4436   | mutS homolog 2, colon cancer, nonpolyposis type 1 (E. coli)               |
| GO | single guanine insertion binding                                 | 1 | 3 | 0.133 | 4436   | mutS homolog 2, colon cancer, nonpolyposis type 1 (E. coli)               |
| GO | negative regulation of vascular endothelial cell proliferation   | 1 | 3 | 0.133 | 4734   | neural precursor cell expressed, developmentally down-regulated 4         |
| GO | phosphoserine binding                                            | 1 | 3 | 0.133 | 4734   | neural precursor cell expressed, developmentally down-regulated 4         |
| GO | positive regulation of Ras GTPase activity                       | 1 | 3 | 0.133 | 4763   | neurofibromin 1                                                           |
| GO | regulation of blood vessel endothelial cell proliferation        | 1 | 3 | 0.133 | 4763   | neurofibromin 1                                                           |
| GO | regulation of bone resorption                                    | 1 | 3 | 0.133 | 4763   | neurofibromin 1                                                           |
| GO | hydrogen:potassium-exchanging ATPase activity                    | 1 | 3 | 0.133 | 479    | ATPase, H+/K+ transporting, nongastric, alpha polypeptide                 |
| GO | visual behavior                                                  | 1 | 3 | 0.133 | 4867   | nephronophthisis 1 (juvenile)                                             |
| GO | clustering of voltage-gated sodium channels                      | 1 | 3 | 0.133 | 4897   | neuronal cell adhesion molecule                                           |
| GO | nuclear pore organization                                        | 1 | 3 | 0.133 | 4928   | nucleoporin 98kDa                                                         |
| GO | depurination                                                     | 1 | 3 | 0.133 | 4968   | 8-oxoguanine DNA glycosylase                                              |
| GO | origin recognition complex                                       | 1 | 3 | 0.133 | 5000   | origin recognition complex, subunit 4-like (yeast)                        |
| GO | estrous cycle phase                                              | 1 | 3 | 0.133 | 5021   | oxytocin receptor                                                         |

|    |                                                         |   |   |       |                                                                                          |
|----|---------------------------------------------------------|---|---|-------|------------------------------------------------------------------------------------------|
| GO | positive regulation of norepinephrine secretion         | 1 | 3 | 0.133 | 5021 oxytocin receptor                                                                   |
| GO | negative regulation of endopeptidase activity           | 1 | 3 | 0.133 | 5054 serpin peptidase inhibitor, clade E (nexin, plasminogen activator inhibitor type 1) |
| GO | negative regulation of plasminogen activator activity   | 1 | 3 | 0.133 | 5054 serpin peptidase inhibitor, clade E (nexin, plasminogen activator inhibitor type 1) |
| GO | positive regulation of monocyte chemotaxis              | 1 | 3 | 0.133 | 5054 serpin peptidase inhibitor, clade E (nexin, plasminogen activator inhibitor type 1) |
| GO | cGMP catabolic process                                  | 1 | 3 | 0.133 | 50940 phosphodiesterase 11A                                                              |
| GO | protein-L-isoaspartate (D-aspartate) O-methylation      | 1 | 3 | 0.133 | 5110 protein-L-isoaspartate (D-aspartate) O-methyltransferase                            |
| GO | respiratory tube development                            | 1 | 3 | 0.133 | 5125 proprotein convertase subtilisin/kexin type 5                                       |
| GO | proton-transporting two-sector ATPase activity          | 1 | 3 | 0.133 | 51382 ATPase, H <sup>+</sup> transporting, lysosomal 34kDa, V1 subunit D                 |
| GO | positive regulation of actin filament bundle formation  | 1 | 3 | 0.133 | 5341 pleckstrin                                                                          |
| GO | protein kinase C signaling cascade                      | 1 | 3 | 0.133 | 5341 pleckstrin                                                                          |
| GO | epithelial cell proliferation involved in morphogenesis | 1 | 3 | 0.133 | 5469 mediator complex subunit 1                                                          |
| GO | mammary gland branching involved in morphogenesis       | 1 | 3 | 0.133 | 5469 mediator complex subunit 1                                                          |
| GO | telomerase inhibitor activity                           | 1 | 3 | 0.133 | 54984 PIN2-interacting protein 1                                                         |
| GO | telomere formation via telomerase                       | 1 | 3 | 0.133 | 55135 WD repeat containing, antisense to TP53                                            |
| GO | maturation of LSU-rRNA from tricistron                  | 1 | 3 | 0.133 | 55759 WD repeat domain 12                                                                |
| GO | PeBoW complex                                           | 1 | 3 | 0.133 | 55759 WD repeat domain 12                                                                |
| GO | inositol 1,3,4,5 tetrakisphosphate binding              | 1 | 3 | 0.133 | 55803 ArfGAP with dual PH domains 2                                                      |
| GO | RNA methylation                                         | 1 | 3 | 0.133 | 56339 methyltransferase like 3                                                           |
| GO | Y-form DNA binding                                      | 1 | 3 | 0.133 | 56852 RAD18 homolog ( <i>S. cerevisiae</i> )                                             |
| GO | peptidyl-amino acid modification                        | 1 | 3 | 0.133 | 57168 aspartate beta-hydroxylase domain containing 2                                     |
| GO | cAMP metabolic process                                  | 1 | 3 | 0.133 | 5744 parathyroid hormone-like hormone                                                    |
| GO | fatty acid homeostasis                                  | 1 | 3 | 0.133 | 57678 glycerol-3-phosphate acyltransferase, mitochondrial                                |
| GO | glycerophospholipid metabolic process                   | 1 | 3 | 0.133 | 57678 glycerol-3-phosphate acyltransferase, mitochondrial                                |
| GO | B cell apoptosis                                        | 1 | 3 | 0.133 | 581 BCL2-associated X protein                                                            |
| GO | cleavage of lamin                                       | 1 | 3 | 0.133 | 581 BCL2-associated X protein                                                            |
| GO | transformed cell apoptosis                              | 1 | 3 | 0.133 | 581 BCL2-associated X protein                                                            |
| GO | choline binding                                         | 1 | 3 | 0.133 | 590 butyrylcholinesterase                                                                |
| GO | cholinesterase activity                                 | 1 | 3 | 0.133 | 590 butyrylcholinesterase                                                                |
| GO | deoxyribonucleotide biosynthetic process                | 1 | 3 | 0.133 | 6241 ribonucleotide reductase M2                                                         |
| GO | ribonucleoside-diphosphate reductase activity           | 1 | 3 | 0.133 | 6241 ribonucleotide reductase M2                                                         |
| GO | regulation of anti-apoptosis                            | 1 | 3 | 0.133 | 6242 rhotekin                                                                            |
| GO | chromocenter                                            | 1 | 3 | 0.133 | 6299 sal-like 1 ( <i>Drosophila</i> )                                                    |
| GO | G-quadruplex DNA binding                                | 1 | 3 | 0.133 | 641 Bloom syndrome, RecQ helicase-like                                                   |
| GO | replication fork protection                             | 1 | 3 | 0.133 | 641 Bloom syndrome, RecQ helicase-like                                                   |
| GO | olfactory receptor binding                              | 1 | 3 | 0.133 | 65055 receptor accessory protein 1                                                       |
| GO | axon extension involved in axon guidance                | 1 | 3 | 0.133 | 6586 slit homolog 3 ( <i>Drosophila</i> )                                                |

|    |                                                                      |   |   |       |                                                                                       |
|----|----------------------------------------------------------------------|---|---|-------|---------------------------------------------------------------------------------------|
| GO | chemorepulsion involved in embryonic                                 | 1 | 3 | 0.133 | 6586 slit homolog 3 (Drosophila)                                                      |
| GO | negative regulation of chemokine-mediated                            | 1 | 3 | 0.133 | 6586 slit homolog 3 (Drosophila)                                                      |
| GO | response to cortisol stimulus                                        | 1 | 3 | 0.133 | 6586 slit homolog 3 (Drosophila)                                                      |
| GO | Roundabout signaling pathway                                         | 1 | 3 | 0.133 | 6586 slit homolog 3 (Drosophila)                                                      |
| GO | miRNA binding                                                        | 1 | 3 | 0.133 | 6657 SRY (sex determining region Y)-box 2                                             |
| GO | olfactory placode formation                                          | 1 | 3 | 0.133 | 6657 SRY (sex determining region Y)-box 2                                             |
| GO | positive regulation of epithelial cell differentiation               | 1 | 3 | 0.133 | 6657 SRY (sex determining region Y)-box 2                                             |
| GO | BH domain binding                                                    | 1 | 3 | 0.133 | 666 BCL2-related ovarian killer                                                       |
| GO | prostate gland morphogenesis                                         | 1 | 3 | 0.133 | 6662 SRY (sex determining region Y)-box 9                                             |
| GO | microtubule severing                                                 | 1 | 3 | 0.133 | 6683 spastin                                                                          |
| GO | common-partner SMAD protein phosphorylation                          | 1 | 3 | 0.133 | 6711 spectrin, beta, non-erythrocytic 1                                               |
| GO | sulfate assimilation                                                 | 1 | 3 | 0.133 | 6820 sulfotransferase family, cytosolic, 2B, member 1                                 |
| GO | potassium ion transmembrane transport                                | 1 | 3 | 0.133 | 6833 ATP-binding cassette, sub-family C (CFTR/MRP), member 8                          |
| GO | positive regulation of transcription from RNA polymerase II promoter | 1 | 3 | 0.133 | 7021 transcription factor AP-2 beta (activating enhancer binding protein 2 beta)      |
| GO | transforming growth factor beta receptor signaling pathway           | 1 | 3 | 0.133 | 7046 transforming growth factor, beta receptor 1                                      |
| GO | transforming growth factor beta receptor signaling pathway           | 1 | 3 | 0.133 | 7046 transforming growth factor, beta receptor 1                                      |
| GO | bleb                                                                 | 1 | 3 | 0.133 | 7168 tropomyosin 1 (alpha)                                                            |
| GO | response to organophosphorus                                         | 1 | 3 | 0.133 | 7298 thymidylate synthetase                                                           |
| GO | mesenchymal to epithelial transition                                 | 1 | 3 | 0.133 | 7490 Wilms tumor 1                                                                    |
| GO | calcium ion-dependent exocytosis of neurotransmitter                 | 1 | 3 | 0.133 | 773 calcium channel, voltage-dependent, P/Q type, alpha 1A subunit                    |
| GO | cellular chloride ion homeostasis                                    | 1 | 3 | 0.133 | 773 calcium channel, voltage-dependent, P/Q type, alpha 1A subunit                    |
| GO | cerebellar Purkinje cell layer development                           | 1 | 3 | 0.133 | 773 calcium channel, voltage-dependent, P/Q type, alpha 1A subunit                    |
| GO | gamma-aminobutyric acid secretion                                    | 1 | 3 | 0.133 | 773 calcium channel, voltage-dependent, P/Q type, alpha 1A subunit                    |
| GO | neurotransmitter metabolic process                                   | 1 | 3 | 0.133 | 773 calcium channel, voltage-dependent, P/Q type, alpha 1A subunit                    |
| GO | retinal rod cell development                                         | 1 | 3 | 0.133 | 7840 Alstrom syndrome 1                                                               |
| GO | transferase activity, transferring acyl groups                       | 1 | 3 | 0.133 | 79071 ELOVL family member 6, elongation of long chain fatty acids (FEN1/Elo2, SLC7A5) |
| GO | maintenance of mitotic sister chromatid cohesion                     | 1 | 3 | 0.133 | 79075 defective in sister chromatid cohesion 1 homolog (S. cerevisiae)                |
| GO | spermidine biosynthetic process                                      | 1 | 3 | 0.133 | 79814 agmatine ureohydrolase (agmatinase)                                             |
| GO | phagocytosis, recognition                                            | 1 | 3 | 0.133 | 81035 collectin sub-family member 12                                                  |
| GO | ER to Golgi transport vesicle                                        | 1 | 3 | 0.133 | 81562 lectin, mannose-binding 2-like                                                  |
| GO | ribonucleoside binding                                               | 1 | 3 | 0.133 | 84172 polymerase (RNA) I polypeptide B, 128kDa                                        |
| GO | malate-aspartate shuttle                                             | 1 | 3 | 0.133 | 8604 solute carrier family 25 (mitochondrial carrier, Aralar), member 12              |
| GO | negative regulation of keratinocyte differentiation                  | 1 | 3 | 0.133 | 8626 tumor protein p63                                                                |
| GO | replicative cell aging                                               | 1 | 3 | 0.133 | 8626 tumor protein p63                                                                |
| GO | response to tumor cell                                               | 1 | 3 | 0.133 | 8626 tumor protein p63                                                                |
| GO | proline catabolic process                                            | 1 | 3 | 0.133 | 8659 aldehyde dehydrogenase 4 family, member A1                                       |



|    |                                         |    |     |       |        |                                                                     |
|----|-----------------------------------------|----|-----|-------|--------|---------------------------------------------------------------------|
| GO | growth hormone receptor signaling patl  | 1  | 3   | 0.133 | 8835   | suppressor of cytokine signaling 2                                  |
| GO | female pronucleus                       | 1  | 3   | 0.133 | 890    | cyclin A2                                                           |
| GO | cellular response to nutrient           | 1  | 3   | 0.133 | 898    | cyclin E1                                                           |
| GO | response to vitamin E                   | 1  | 3   | 0.133 | 898    | cyclin E1                                                           |
| GO | regulation of dendrite development      | 1  | 3   | 0.133 | 8997   | kalirin, RhoGEF kinase                                              |
| GO | Fanconi anaemia nuclear complex         | 1  | 3   | 0.133 | 91442  | chromosome 19 open reading frame 40                                 |
| GO | negative regulation of estrogen recepto | 1  | 3   | 0.133 | 9420   | cytochrome P450, family 7, subfamily B, polypeptide 1               |
| GO | sodium:bicarbonate symporter activity   | 1  | 3   | 0.133 | 9497   | solute carrier family 4, sodium bicarbonate cotransporter, member 7 |
| GO | GABA-B receptor activity                | 1  | 3   | 0.133 | 9568   | gamma-aminobutyric acid (GABA) B receptor, 2                        |
| GO | apoptosis                               | 26 | 444 | 0.134 | 132851 | spermatogenesis associated 4                                        |
| GO | apoptosis                               | 26 | 444 | 0.134 | 2139   | eyes absent homolog 2 (Drosophila)                                  |
| GO | apoptosis                               | 26 | 444 | 0.134 | 220042 | chromosome 11 open reading frame 82                                 |
| GO | apoptosis                               | 26 | 444 | 0.134 | 22868  | FAST kinase domains 2                                               |
| GO | apoptosis                               | 26 | 444 | 0.134 | 23705  | cell adhesion molecule 1                                            |
| GO | apoptosis                               | 26 | 444 | 0.134 | 26230  | T-cell lymphoma invasion and metastasis 2                           |
| GO | apoptosis                               | 26 | 444 | 0.134 | 26586  | cytoskeleton associated protein 2                                   |
| GO | apoptosis                               | 26 | 444 | 0.134 | 26999  | cytoplasmic FMR1 interacting protein 2                              |
| GO | apoptosis                               | 26 | 444 | 0.134 | 2736   | GLI family zinc finger 2                                            |
| GO | apoptosis                               | 26 | 444 | 0.134 | 30011  | SH3-domain kinase binding protein 1                                 |
| GO | apoptosis                               | 26 | 444 | 0.134 | 332    | baculoviral IAP repeat-containing 5                                 |
| GO | apoptosis                               | 26 | 444 | 0.134 | 355    | Fas (TNF receptor superfamily, member 6)                            |
| GO | apoptosis                               | 26 | 444 | 0.134 | 51499  | TP53 regulated inhibitor of apoptosis 1                             |
| GO | apoptosis                               | 26 | 444 | 0.134 | 57099  | apoptosis, caspase activation inhibitor                             |
| GO | apoptosis                               | 26 | 444 | 0.134 | 5924   | Ras protein-specific guanine nucleotide-releasing factor 2          |
| GO | apoptosis                               | 26 | 444 | 0.134 | 6242   | rhotekin                                                            |
| GO | apoptosis                               | 26 | 444 | 0.134 | 64393  | zinc finger, matrin type 3                                          |
| GO | apoptosis                               | 26 | 444 | 0.134 | 64782  | apoptosis enhancing nuclease                                        |
| GO | apoptosis                               | 26 | 444 | 0.134 | 666    | BCL2-related ovarian killer                                         |
| GO | apoptosis                               | 26 | 444 | 0.134 | 672    | breast cancer 1, early onset                                        |
| GO | apoptosis                               | 26 | 444 | 0.134 | 70     | actin, alpha, cardiac muscle 1                                      |
| GO | apoptosis                               | 26 | 444 | 0.134 | 7840   | Alstrom syndrome 1                                                  |
| GO | apoptosis                               | 26 | 444 | 0.134 | 8626   | tumor protein p63                                                   |
| GO | apoptosis                               | 26 | 444 | 0.134 | 8997   | kalirin, RhoGEF kinase                                              |
| GO | apoptosis                               | 26 | 444 | 0.134 | 9262   | serine/threonine kinase 17b                                         |
| GO | apoptosis                               | 26 | 444 | 0.134 | 94241  | tumor protein p53 inducible nuclear protein 1                       |
| GO | double-stranded DNA binding             | 6  | 75  | 0.135 | 2237   | flap structure-specific endonuclease 1                              |

|    |                                            |    |     |       |                                                                                  |
|----|--------------------------------------------|----|-----|-------|----------------------------------------------------------------------------------|
| GO | double-stranded DNA binding                | 6  | 75  | 0.135 | 3149 high-mobility group box 3                                                   |
| GO | double-stranded DNA binding                | 6  | 75  | 0.135 | 4436 mutS homolog 2, colon cancer, nonpolyposis type 1 (E. coli)                 |
| GO | double-stranded DNA binding                | 6  | 75  | 0.135 | 5303 protein (peptidylprolyl cis/trans isomerase) NIMA-interacting, 4 (parvulin) |
| GO | double-stranded DNA binding                | 6  | 75  | 0.135 | 7490 Wilms tumor 1                                                               |
| GO | double-stranded DNA binding                | 6  | 75  | 0.135 | 8626 tumor protein p63                                                           |
| GO | regulation of axonogenesis                 | 2  | 14  | 0.136 | 1000 cadherin 2, type 1, N-cadherin (neuronal)                                   |
| GO | regulation of axonogenesis                 | 2  | 14  | 0.136 | 773 calcium channel, voltage-dependent, P/Q type, alpha 1A subunit               |
| GO | senescence                                 | 2  | 14  | 0.136 | 1026 cyclin-dependent kinase inhibitor 1A (p21, Cip1)                            |
| GO | senescence                                 | 2  | 14  | 0.136 | 2305 forkhead box M1                                                             |
| GO | synaptic transmission, cholinergic         | 2  | 14  | 0.136 | 1136 cholinergic receptor, nicotinic, alpha 3                                    |
| GO | synaptic transmission, cholinergic         | 2  | 14  | 0.136 | 348 apolipoprotein E                                                             |
| GO | selenium binding                           | 2  | 14  | 0.136 | 1733 deiodinase, iodothyronine, type I                                           |
| GO | selenium binding                           | 2  | 14  | 0.136 | 2878 glutathione peroxidase 3 (plasma)                                           |
| GO | DNA methylation                            | 2  | 14  | 0.136 | 1787 tRNA aspartic acid methyltransferase 1                                      |
| GO | DNA methylation                            | 2  | 14  | 0.136 | 1788 DNA (cytosine-5-)-methyltransferase 3 alpha                                 |
| GO | regulation of sensory perception of pair   | 2  | 14  | 0.136 | 2149 coagulation factor II (thrombin) receptor                                   |
| GO | regulation of sensory perception of pair   | 2  | 14  | 0.136 | 2906 glutamate receptor, ionotropic, N-methyl D-aspartate 2D                     |
| GO | acyl-CoA metabolic process                 | 2  | 14  | 0.136 | 23305 acyl-CoA synthetase long-chain family member 6                             |
| GO | acyl-CoA metabolic process                 | 2  | 14  | 0.136 | 57678 glycerol-3-phosphate acyltransferase, mitochondrial                        |
| GO | isoprenoid biosynthetic process            | 2  | 14  | 0.136 | 23590 prenyl (decaprenyl) diphosphate synthase, subunit 1                        |
| GO | isoprenoid biosynthetic process            | 2  | 14  | 0.136 | 3157 3-hydroxy-3-methylglutaryl-Coenzyme A synthase 1 (soluble)                  |
| GO | behavioral fear response                   | 2  | 14  | 0.136 | 2558 gamma-aminobutyric acid (GABA) A receptor, alpha 5                          |
| GO | behavioral fear response                   | 2  | 14  | 0.136 | 2898 glutamate receptor, ionotropic, kainate 2                                   |
| GO | regulation of action potential in neuron   | 2  | 14  | 0.136 | 2898 glutamate receptor, ionotropic, kainate 2                                   |
| GO | regulation of action potential in neuron   | 2  | 14  | 0.136 | 3778 potassium large conductance calcium-activated channel, subfamily M, alpha   |
| GO | kinesin complex                            | 2  | 14  | 0.136 | 3797 kinesin family member 3C                                                    |
| GO | kinesin complex                            | 2  | 14  | 0.136 | 3800 kinesin family member 5C                                                    |
| GO | Wnt-protein binding                        | 2  | 14  | 0.136 | 6422 secreted frizzled-related protein 1                                         |
| GO | Wnt-protein binding                        | 2  | 14  | 0.136 | 8325 frizzled homolog 8 (Drosophila)                                             |
| GO | dystrophin-associated glycoprotein complex | 2  | 14  | 0.136 | 6442 sarcoglycan, alpha (50kDa dystrophin-associated glycoprotein)               |
| GO | dystrophin-associated glycoprotein complex | 2  | 14  | 0.136 | 6444 sarcoglycan, delta (35kDa dystrophin-associated glycoprotein)               |
| GO | DNA damage response, signal transduction   | 2  | 14  | 0.136 | 64782 apoptosis enhancing nuclease                                               |
| GO | DNA damage response, signal transduction   | 2  | 14  | 0.136 | 8626 tumor protein p63                                                           |
| GO | cell fate specification                    | 2  | 14  | 0.136 | 6657 SRY (sex determining region Y)-box 2                                        |
| GO | cell fate specification                    | 2  | 14  | 0.136 | 6662 SRY (sex determining region Y)-box 9                                        |
| GO | ubiquitin-protein ligase activity          | 10 | 145 | 0.138 | 1161 excision repair cross-complementing rodent repair deficiency, complement    |

|    |                                         |    |     |       |        |                                                                           |
|----|-----------------------------------------|----|-----|-------|--------|---------------------------------------------------------------------------|
| GO | ubiquitin-protein ligase activity       | 10 | 145 | 0.138 | 130507 | ubiquitin protein ligase E3 component n-recognin 3 (putative)             |
| GO | ubiquitin-protein ligase activity       | 10 | 145 | 0.138 | 1643   | damage-specific DNA binding protein 2, 48kDa                              |
| GO | ubiquitin-protein ligase activity       | 10 | 145 | 0.138 | 23194  | F-box and leucine-rich repeat protein 7                                   |
| GO | ubiquitin-protein ligase activity       | 10 | 145 | 0.138 | 25827  | F-box and leucine-rich repeat protein 2                                   |
| GO | ubiquitin-protein ligase activity       | 10 | 145 | 0.138 | 26223  | F-box and leucine-rich repeat protein 21 (gene/pseudogene)                |
| GO | ubiquitin-protein ligase activity       | 10 | 145 | 0.138 | 26263  | F-box protein 22                                                          |
| GO | ubiquitin-protein ligase activity       | 10 | 145 | 0.138 | 4734   | neural precursor cell expressed, developmentally down-regulated 4         |
| GO | ubiquitin-protein ligase activity       | 10 | 145 | 0.138 | 672    | breast cancer 1, early onset                                              |
| GO | ubiquitin-protein ligase activity       | 10 | 145 | 0.138 | 7324   | ubiquitin-conjugating enzyme E2E 1 (UBC4/5 homolog, yeast)                |
| GO | nuclear mRNA splicing, via spliceosome  | 4  | 43  | 0.138 | 10212  | DEAD (Asp-Glu-Ala-Asp) box polypeptide 39                                 |
| GO | nuclear mRNA splicing, via spliceosome  | 4  | 43  | 0.138 | 10465  | peptidylprolyl isomerase H (cyclophilin H)                                |
| GO | nuclear mRNA splicing, via spliceosome  | 4  | 43  | 0.138 | 3183   | heterogeneous nuclear ribonucleoprotein C (C1/C2)                         |
| GO | nuclear mRNA splicing, via spliceosome  | 4  | 43  | 0.138 | 79833  | gem (nuclear organelle) associated protein 6                              |
| GO | nucleoside-triphosphatase activity      | 5  | 59  | 0.138 | 5000   | origin recognition complex, subunit 4-like (yeast)                        |
| GO | nucleoside-triphosphatase activity      | 5  | 59  | 0.138 | 55137  | fidgetin                                                                  |
| GO | nucleoside-triphosphatase activity      | 5  | 59  | 0.138 | 5702   | proteasome (prosome, macropain) 26S subunit, ATPase, 3                    |
| GO | nucleoside-triphosphatase activity      | 5  | 59  | 0.138 | 5889   | RAD51 homolog C ( <i>S. cerevisiae</i> )                                  |
| GO | nucleoside-triphosphatase activity      | 5  | 59  | 0.138 | 6683   | spastin                                                                   |
| GO | single fertilization                    | 3  | 28  | 0.139 | 1047   | calmegin                                                                  |
| GO | single fertilization                    | 3  | 28  | 0.139 | 53340  | sperm autoantigenic protein 17                                            |
| GO | single fertilization                    | 3  | 28  | 0.139 | 8747   | ADAM metallopeptidase domain 21                                           |
| GO | regulation of cell migration            | 3  | 28  | 0.139 | 10672  | guanine nucleotide binding protein (G protein), alpha 13                  |
| GO | regulation of cell migration            | 3  | 28  | 0.139 | 182    | jagged 1 (Alagille syndrome)                                              |
| GO | regulation of cell migration            | 3  | 28  | 0.139 | 91624  | nexilin (F actin binding protein)                                         |
| GO | RNA polymerase II transcription mediati | 3  | 28  | 0.139 | 116931 | mediator complex subunit 12-like                                          |
| GO | RNA polymerase II transcription mediati | 3  | 28  | 0.139 | 51003  | mediator complex subunit 31                                               |
| GO | RNA polymerase II transcription mediati | 3  | 28  | 0.139 | 5469   | mediator complex subunit 1                                                |
| GO | camera-type eye development             | 3  | 28  | 0.139 | 1543   | cytochrome P450, family 1, subfamily A, polypeptide 1                     |
| GO | camera-type eye development             | 3  | 28  | 0.139 | 5469   | mediator complex subunit 1                                                |
| GO | camera-type eye development             | 3  | 28  | 0.139 | 7490   | Wilms tumor 1                                                             |
| GO | integrin complex                        | 3  | 28  | 0.139 | 22801  | integrin, alpha 11                                                        |
| GO | integrin complex                        | 3  | 28  | 0.139 | 3685   | integrin, alpha V (vitronectin receptor, alpha polypeptide, antigen CD51) |
| GO | integrin complex                        | 3  | 28  | 0.139 | 3694   | integrin, beta 6                                                          |
| GO | lactation                               | 3  | 28  | 0.139 | 4830   | non-metastatic cells 1, protein (NM23A) expressed in                      |
| GO | lactation                               | 3  | 28  | 0.139 | 5021   | oxytocin receptor                                                         |
| GO | lactation                               | 3  | 28  | 0.139 | 5469   | mediator complex subunit 1                                                |

|    |                         |     |      |       |        |                                                                               |
|----|-------------------------|-----|------|-------|--------|-------------------------------------------------------------------------------|
| GO | protein oligomerization | 3   | 28   | 0.139 | 6241   | ribonucleotide reductase M2                                                   |
| GO | protein oligomerization | 3   | 28   | 0.139 | 641    | Bloom syndrome, RecQ helicase-like                                            |
| GO | protein oligomerization | 3   | 28   | 0.139 | 7010   | TEK tyrosine kinase, endothelial                                              |
| GO | nucleus                 | 234 | 4735 | 0.14  | 1E+08  | forkhead box O6                                                               |
| GO | nucleus                 | 234 | 4735 | 0.14  | 10051  | structural maintenance of chromosomes 4                                       |
| GO | nucleus                 | 234 | 4735 | 0.14  | 10055  | SUMO1 activating enzyme subunit 1                                             |
| GO | nucleus                 | 234 | 4735 | 0.14  | 10123  | ADP-ribosylation factor-like 4C                                               |
| GO | nucleus                 | 234 | 4735 | 0.14  | 10189  | THO complex 4                                                                 |
| GO | nucleus                 | 234 | 4735 | 0.14  | 10199  | M-phase phosphoprotein 10 (U3 small nucleolar ribonucleoprotein)              |
| GO | nucleus                 | 234 | 4735 | 0.14  | 10202  | dehydrogenase/reductase (SDR family) member 2                                 |
| GO | nucleus                 | 234 | 4735 | 0.14  | 10212  | DEAD (Asp-Glu-Ala-Asp) box polypeptide 39                                     |
| GO | nucleus                 | 234 | 4735 | 0.14  | 1026   | cyclin-dependent kinase inhibitor 1A (p21, Cip1)                              |
| GO | nucleus                 | 234 | 4735 | 0.14  | 10395  | deleted in liver cancer 1                                                     |
| GO | nucleus                 | 234 | 4735 | 0.14  | 1045   | caudal type homeobox 2                                                        |
| GO | nucleus                 | 234 | 4735 | 0.14  | 10465  | peptidylprolyl isomerase H (cyclophilin H)                                    |
| GO | nucleus                 | 234 | 4735 | 0.14  | 10474  | transcriptional adaptor 3                                                     |
| GO | nucleus                 | 234 | 4735 | 0.14  | 10492  | synaptotagmin binding, cytoplasmic RNA interacting protein                    |
| GO | nucleus                 | 234 | 4735 | 0.14  | 10528  | NOP56 ribonucleoprotein homolog (yeast)                                       |
| GO | nucleus                 | 234 | 4735 | 0.14  | 10622  | polymerase (RNA) III (DNA directed) polypeptide G (32kD)                      |
| GO | nucleus                 | 234 | 4735 | 0.14  | 10656  | KH domain containing, RNA binding, signal transduction associated 3           |
| GO | nucleus                 | 234 | 4735 | 0.14  | 10785  | WD repeat domain 4                                                            |
| GO | nucleus                 | 234 | 4735 | 0.14  | 10799  | ribonuclease P/MRP 40kDa subunit                                              |
| GO | nucleus                 | 234 | 4735 | 0.14  | 11056  | DEAD (Asp-Glu-Ala-Asp) box polypeptide 52                                     |
| GO | nucleus                 | 234 | 4735 | 0.14  | 11169  | WD repeat and HMG-box DNA binding protein 1                                   |
| GO | nucleus                 | 234 | 4735 | 0.14  | 11259  | filamin A interacting protein 1-like                                          |
| GO | nucleus                 | 234 | 4735 | 0.14  | 11278  | Kruppel-like factor 12                                                        |
| GO | nucleus                 | 234 | 4735 | 0.14  | 113130 | cell division cycle associated 5                                              |
| GO | nucleus                 | 234 | 4735 | 0.14  | 1161   | excision repair cross-complementing rodent repair deficiency, complement      |
| GO | nucleus                 | 234 | 4735 | 0.14  | 116931 | mediator complex subunit 12-like                                              |
| GO | nucleus                 | 234 | 4735 | 0.14  | 118924 | chromosome 10 open reading frame 4                                            |
| GO | nucleus                 | 234 | 4735 | 0.14  | 12     | serpin peptidase inhibitor, clade A (alpha-1 antiproteinase, antitrypsin), me |
| GO | nucleus                 | 234 | 4735 | 0.14  | 126374 | Wilms tumor 1 interacting protein                                             |
| GO | nucleus                 | 234 | 4735 | 0.14  | 132625 | zinc finger protein 42 homolog (mouse)                                        |
| GO | nucleus                 | 234 | 4735 | 0.14  | 135114 | histidine triad nucleotide binding protein 3                                  |
| GO | nucleus                 | 234 | 4735 | 0.14  | 135295 | splicing factor, arginine/serine-rich 13B                                     |
| GO | nucleus                 | 234 | 4735 | 0.14  | 139324 | highly divergent homeobox                                                     |

|    |         |     |      |      |        |                                                                                |
|----|---------|-----|------|------|--------|--------------------------------------------------------------------------------|
| GO | nucleus | 234 | 4735 | 0.14 | 148213 | zinc finger protein 681                                                        |
| GO | nucleus | 234 | 4735 | 0.14 | 150684 | copper metabolism (Murr1) domain containing 1                                  |
| GO | nucleus | 234 | 4735 | 0.14 | 157570 | establishment of cohesion 1 homolog 2 ( <i>S. cerevisiae</i> )                 |
| GO | nucleus | 234 | 4735 | 0.14 | 1643   | damage-specific DNA binding protein 2, 48kDa                                   |
| GO | nucleus | 234 | 4735 | 0.14 | 166336 | prickle homolog 2 ( <i>Drosophila</i> )                                        |
| GO | nucleus | 234 | 4735 | 0.14 | 170082 | transcription elongation factor A (SII) N-terminal and central domain containi |
| GO | nucleus | 234 | 4735 | 0.14 | 1746   | distal-less homeobox 2                                                         |
| GO | nucleus | 234 | 4735 | 0.14 | 1787   | tRNA aspartic acid methyltransferase 1                                         |
| GO | nucleus | 234 | 4735 | 0.14 | 1788   | DNA (cytosine-5-)-methyltransferase 3 alpha                                    |
| GO | nucleus | 234 | 4735 | 0.14 | 195828 | zinc finger protein 367                                                        |
| GO | nucleus | 234 | 4735 | 0.14 | 1984   | eukaryotic translation initiation factor 5A                                    |
| GO | nucleus | 234 | 4735 | 0.14 | 201299 | RAD52 motif 1                                                                  |
| GO | nucleus | 234 | 4735 | 0.14 | 203    | adenylate kinase 1                                                             |
| GO | nucleus | 234 | 4735 | 0.14 | 2139   | eyes absent homolog 2 ( <i>Drosophila</i> )                                    |
| GO | nucleus | 234 | 4735 | 0.14 | 219736 | storkhead box 1                                                                |
| GO | nucleus | 234 | 4735 | 0.14 | 220042 | chromosome 11 open reading frame 82                                            |
| GO | nucleus | 234 | 4735 | 0.14 | 2237   | flap structure-specific endonuclease 1                                         |
| GO | nucleus | 234 | 4735 | 0.14 | 2273   | four and a half LIM domains 1                                                  |
| GO | nucleus | 234 | 4735 | 0.14 | 2305   | forkhead box M1                                                                |
| GO | nucleus | 234 | 4735 | 0.14 | 23305  | acyl-CoA synthetase long-chain family member 6                                 |
| GO | nucleus | 234 | 4735 | 0.14 | 23594  | origin recognition complex, subunit 6 like (yeast)                             |
| GO | nucleus | 234 | 4735 | 0.14 | 23658  | LSM5 homolog, U6 small nuclear RNA associated ( <i>S. cerevisiae</i> )         |
| GO | nucleus | 234 | 4735 | 0.14 | 241    | arachidonate 5-lipoxygenase-activating protein                                 |
| GO | nucleus | 234 | 4735 | 0.14 | 2533   | FYN binding protein (FYB-120/130)                                              |
| GO | nucleus | 234 | 4735 | 0.14 | 25758  | chromosome 11 open reading frame 41                                            |
| GO | nucleus | 234 | 4735 | 0.14 | 25885  | polymerase (RNA) I polypeptide A, 194kDa                                       |
| GO | nucleus | 234 | 4735 | 0.14 | 25926  | nucleolar protein 11                                                           |
| GO | nucleus | 234 | 4735 | 0.14 | 25953  | paroxysmal nonkinesigenic dyskinesia                                           |
| GO | nucleus | 234 | 4735 | 0.14 | 26019  | UPF2 regulator of nonsense transcripts homolog (yeast)                         |
| GO | nucleus | 234 | 4735 | 0.14 | 27065  | DNA segment on chromosome 4 (unique) 234 expressed sequence                    |
| GO | nucleus | 234 | 4735 | 0.14 | 27244  | sestrin 1                                                                      |
| GO | nucleus | 234 | 4735 | 0.14 | 27258  | LSM3 homolog, U6 small nuclear RNA associated ( <i>S. cerevisiae</i> )         |
| GO | nucleus | 234 | 4735 | 0.14 | 2736   | GLI family zinc finger 2                                                       |
| GO | nucleus | 234 | 4735 | 0.14 | 27429  | HtrA serine peptidase 2                                                        |
| GO | nucleus | 234 | 4735 | 0.14 | 2842   | G protein-coupled receptor 19                                                  |
| GO | nucleus | 234 | 4735 | 0.14 | 284443 | zinc finger protein 493                                                        |

|    |         |     |      |      |                                                                             |
|----|---------|-----|------|------|-----------------------------------------------------------------------------|
| GO | nucleus | 234 | 4735 | 0.14 | 28984 chromosome 13 open reading frame 15                                   |
| GO | nucleus | 234 | 4735 | 0.14 | 29128 ubiquitin-like with PHD and ring finger domains 1                     |
| GO | nucleus | 234 | 4735 | 0.14 | 2965 general transcription factor IIH, polypeptide 1, 62kDa                 |
| GO | nucleus | 234 | 4735 | 0.14 | 29842 transcription factor CP2-like 1                                       |
| GO | nucleus | 234 | 4735 | 0.14 | 29893 PSMC3 interacting protein                                             |
| GO | nucleus | 234 | 4735 | 0.14 | 29995 LIM and cysteine-rich domains 1                                       |
| GO | nucleus | 234 | 4735 | 0.14 | 30011 SH3-domain kinase binding protein 1                                   |
| GO | nucleus | 234 | 4735 | 0.14 | 3149 high-mobility group box 3                                              |
| GO | nucleus | 234 | 4735 | 0.14 | 3183 heterogeneous nuclear ribonucleoprotein C (C1/C2)                      |
| GO | nucleus | 234 | 4735 | 0.14 | 3224 homeobox C8                                                            |
| GO | nucleus | 234 | 4735 | 0.14 | 3236 homeobox D10                                                           |
| GO | nucleus | 234 | 4735 | 0.14 | 3237 homeobox D11                                                           |
| GO | nucleus | 234 | 4735 | 0.14 | 3248 hydroxyprostaglandin dehydrogenase 15-(NAD)                            |
| GO | nucleus | 234 | 4735 | 0.14 | 3276 protein arginine methyltransferase 1                                   |
| GO | nucleus | 234 | 4735 | 0.14 | 332 baculoviral IAP repeat-containing 5                                     |
| GO | nucleus | 234 | 4735 | 0.14 | 344191 even-skipped homeobox 2                                              |
| GO | nucleus | 234 | 4735 | 0.14 | 345630 fibrillarin-like 1                                                   |
| GO | nucleus | 234 | 4735 | 0.14 | 347902 adhesion molecule with Ig-like domain 2                              |
| GO | nucleus | 234 | 4735 | 0.14 | 3516 recombination signal binding protein for immunoglobulin kappa J region |
| GO | nucleus | 234 | 4735 | 0.14 | 3836 karyopherin alpha 1 (importin alpha 5)                                 |
| GO | nucleus | 234 | 4735 | 0.14 | 3838 karyopherin alpha 2 (RAG cohort 1, importin alpha 1)                   |
| GO | nucleus | 234 | 4735 | 0.14 | 387103 centromere protein W                                                 |
| GO | nucleus | 234 | 4735 | 0.14 | 389421 lin-28 homolog B (C. elegans)                                        |
| GO | nucleus | 234 | 4735 | 0.14 | 3975 LIM homeobox 1                                                         |
| GO | nucleus | 234 | 4735 | 0.14 | 406 aryl hydrocarbon receptor nuclear translocator-like                     |
| GO | nucleus | 234 | 4735 | 0.14 | 409 arrestin, beta 2                                                        |
| GO | nucleus | 234 | 4735 | 0.14 | 4094 v-maf musculoaponeurotic fibrosarcoma oncogene homolog (avian)         |
| GO | nucleus | 234 | 4735 | 0.14 | 4171 minichromosome maintenance complex component 2                         |
| GO | nucleus | 234 | 4735 | 0.14 | 4287 ataxin 3                                                               |
| GO | nucleus | 234 | 4735 | 0.14 | 4291 myeloid leukemia factor 1                                              |
| GO | nucleus | 234 | 4735 | 0.14 | 4292 mutL homolog 1, colon cancer, nonpolyposis type 2 (E. coli)            |
| GO | nucleus | 234 | 4735 | 0.14 | 431707 LIM homeobox 8                                                       |
| GO | nucleus | 234 | 4735 | 0.14 | 4436 mutS homolog 2, colon cancer, nonpolyposis type 1 (E. coli)            |
| GO | nucleus | 234 | 4735 | 0.14 | 4603 v-myb myeloblastosis viral oncogene homolog (avian)-like 1             |
| GO | nucleus | 234 | 4735 | 0.14 | 4763 neurofibromin 1                                                        |
| GO | nucleus | 234 | 4735 | 0.14 | 4830 non-metastatic cells 1, protein (NM23A) expressed in                   |

|    |         |     |      |      |       |                                                                             |
|----|---------|-----|------|------|-------|-----------------------------------------------------------------------------|
| GO | nucleus | 234 | 4735 | 0.14 | 4928  | nucleoporin 98kDa                                                           |
| GO | nucleus | 234 | 4735 | 0.14 | 4968  | 8-oxoguanine DNA glycosylase                                                |
| GO | nucleus | 234 | 4735 | 0.14 | 5000  | origin recognition complex, subunit 4-like (yeast)                          |
| GO | nucleus | 234 | 4735 | 0.14 | 5015  | orthodenticle homeobox 2                                                    |
| GO | nucleus | 234 | 4735 | 0.14 | 50485 | SWI/SNF related, matrix associated, actin dependent regulator of chromati   |
| GO | nucleus | 234 | 4735 | 0.14 | 5081  | paired box 7                                                                |
| GO | nucleus | 234 | 4735 | 0.14 | 51003 | mediator complex subunit 31                                                 |
| GO | nucleus | 234 | 4735 | 0.14 | 51177 | pleckstrin homology domain containing, family O member 1                    |
| GO | nucleus | 234 | 4735 | 0.14 | 51213 | leucine zipper protein 4                                                    |
| GO | nucleus | 234 | 4735 | 0.14 | 51339 | dapper, antagonist of beta-catenin, homolog 1 (Xenopus laevis)              |
| GO | nucleus | 234 | 4735 | 0.14 | 51460 | Scm-like with four mbt domains 1                                            |
| GO | nucleus | 234 | 4735 | 0.14 | 51491 | NOP16 nucleolar protein homolog (yeast)                                     |
| GO | nucleus | 234 | 4735 | 0.14 | 5216  | profilin 1                                                                  |
| GO | nucleus | 234 | 4735 | 0.14 | 5245  | prohibitin                                                                  |
| GO | nucleus | 234 | 4735 | 0.14 | 5303  | protein (peptidylprolyl cis/trans isomerase) NIMA-interacting, 4 (parvulin) |
| GO | nucleus | 234 | 4735 | 0.14 | 5378  | PMS1 postmeiotic segregation increased 1 (S. cerevisiae)                    |
| GO | nucleus | 234 | 4735 | 0.14 | 53981 | cleavage and polyadenylation specific factor 2, 100kDa                      |
| GO | nucleus | 234 | 4735 | 0.14 | 5440  | polymerase (RNA) II (DNA directed) polypeptide K, 7.0kDa                    |
| GO | nucleus | 234 | 4735 | 0.14 | 5469  | mediator complex subunit 1                                                  |
| GO | nucleus | 234 | 4735 | 0.14 | 54796 | basonuclin 2                                                                |
| GO | nucleus | 234 | 4735 | 0.14 | 54828 | breast carcinoma amplified sequence 3                                       |
| GO | nucleus | 234 | 4735 | 0.14 | 54984 | PIN2-interacting protein 1                                                  |
| GO | nucleus | 234 | 4735 | 0.14 | 54993 | zinc finger and SCAN domain containing 2                                    |
| GO | nucleus | 234 | 4735 | 0.14 | 55003 | PAK1 interacting protein 1                                                  |
| GO | nucleus | 234 | 4735 | 0.14 | 55012 | protein phosphatase 2 (formerly 2A), regulatory subunit B", gamma           |
| GO | nucleus | 234 | 4735 | 0.14 | 55135 | WD repeat containing, antisense to TP53                                     |
| GO | nucleus | 234 | 4735 | 0.14 | 55137 | fidgetin                                                                    |
| GO | nucleus | 234 | 4735 | 0.14 | 55215 | Fanconi anemia, complementation group I                                     |
| GO | nucleus | 234 | 4735 | 0.14 | 55323 | La ribonucleoprotein domain family, member 6                                |
| GO | nucleus | 234 | 4735 | 0.14 | 55506 | H2A histone family, member Y2                                               |
| GO | nucleus | 234 | 4735 | 0.14 | 5569  | protein kinase (cAMP-dependent, catalytic) inhibitor alpha                  |
| GO | nucleus | 234 | 4735 | 0.14 | 55759 | WD repeat domain 12                                                         |
| GO | nucleus | 234 | 4735 | 0.14 | 55854 | zinc finger CCCH-type containing 15                                         |
| GO | nucleus | 234 | 4735 | 0.14 | 5588  | protein kinase C, theta                                                     |
| GO | nucleus | 234 | 4735 | 0.14 | 55916 | nuclear transport factor 2-like export factor 2                             |
| GO | nucleus | 234 | 4735 | 0.14 | 56339 | methyltransferase like 3                                                    |

|    |         |     |      |      |                                                                                  |
|----|---------|-----|------|------|----------------------------------------------------------------------------------|
| GO | nucleus | 234 | 4735 | 0.14 | 56655 polymerase (DNA-directed), epsilon 4 (p12 subunit)                         |
| GO | nucleus | 234 | 4735 | 0.14 | 56852 RAD18 homolog ( <i>S. cerevisiae</i> )                                     |
| GO | nucleus | 234 | 4735 | 0.14 | 56902 partner of NOB1 homolog ( <i>S. cerevisiae</i> )                           |
| GO | nucleus | 234 | 4735 | 0.14 | 5702 proteasome (prosome, macropain) 26S subunit, ATPase, 3                      |
| GO | nucleus | 234 | 4735 | 0.14 | 5744 parathyroid hormone-like hormone                                            |
| GO | nucleus | 234 | 4735 | 0.14 | 57590 WD repeat and FYVE domain containing 1                                     |
| GO | nucleus | 234 | 4735 | 0.14 | 57599 WD repeat domain 48                                                        |
| GO | nucleus | 234 | 4735 | 0.14 | 5795 protein tyrosine phosphatase, receptor type, J                              |
| GO | nucleus | 234 | 4735 | 0.14 | 58155 polypyrimidine tract binding protein 2                                     |
| GO | nucleus | 234 | 4735 | 0.14 | 58499 zinc finger protein 462                                                    |
| GO | nucleus | 234 | 4735 | 0.14 | 5889 RAD51 homolog C ( <i>S. cerevisiae</i> )                                    |
| GO | nucleus | 234 | 4735 | 0.14 | 59336 PR domain containing 13                                                    |
| GO | nucleus | 234 | 4735 | 0.14 | 5965 RecQ protein-like (DNA helicase Q1-like)                                    |
| GO | nucleus | 234 | 4735 | 0.14 | 6000 regulator of G-protein signaling 7                                          |
| GO | nucleus | 234 | 4735 | 0.14 | 6299 sal-like 1 ( <i>Drosophila</i> )                                            |
| GO | nucleus | 234 | 4735 | 0.14 | 641 Bloom syndrome, RecQ helicase-like                                           |
| GO | nucleus | 234 | 4735 | 0.14 | 64151 non-SMC condensin I complex, subunit G                                     |
| GO | nucleus | 234 | 4735 | 0.14 | 64318 nucleolar complex associated 3 homolog ( <i>S. cerevisiae</i> )            |
| GO | nucleus | 234 | 4735 | 0.14 | 64393 zinc finger, matrin type 3                                                 |
| GO | nucleus | 234 | 4735 | 0.14 | 644890 meiosis expressed gene 1 homolog (mouse)                                  |
| GO | nucleus | 234 | 4735 | 0.14 | 6474 short stature homeobox 2                                                    |
| GO | nucleus | 234 | 4735 | 0.14 | 64782 apoptosis enhancing nuclease                                               |
| GO | nucleus | 234 | 4735 | 0.14 | 64785 GINS complex subunit 3 (Psf3 homolog)                                      |
| GO | nucleus | 234 | 4735 | 0.14 | 6591 snail homolog 2 ( <i>Drosophila</i> )                                       |
| GO | nucleus | 234 | 4735 | 0.14 | 6615 snail homolog 1 ( <i>Drosophila</i> )                                       |
| GO | nucleus | 234 | 4735 | 0.14 | 6637 small nuclear ribonucleoprotein polypeptide G                               |
| GO | nucleus | 234 | 4735 | 0.14 | 6657 SRY (sex determining region Y)-box 2                                        |
| GO | nucleus | 234 | 4735 | 0.14 | 6659 SRY (sex determining region Y)-box 4                                        |
| GO | nucleus | 234 | 4735 | 0.14 | 6662 SRY (sex determining region Y)-box 9                                        |
| GO | nucleus | 234 | 4735 | 0.14 | 6672 SP100 nuclear antigen                                                       |
| GO | nucleus | 234 | 4735 | 0.14 | 6683 spastin                                                                     |
| GO | nucleus | 234 | 4735 | 0.14 | 6711 spectrin, beta, non-erythrocytic 1                                          |
| GO | nucleus | 234 | 4735 | 0.14 | 672 breast cancer 1, early onset                                                 |
| GO | nucleus | 234 | 4735 | 0.14 | 6741 Sjogren syndrome antigen B (autoantigen La)                                 |
| GO | nucleus | 234 | 4735 | 0.14 | 6899 T-box 1                                                                     |
| GO | nucleus | 234 | 4735 | 0.14 | 7021 transcription factor AP-2 beta (activating enhancer binding protein 2 beta) |



|    |         |     |      |      |                                                                                  |
|----|---------|-----|------|------|----------------------------------------------------------------------------------|
| GO | nucleus | 234 | 4735 | 0.14 | 7029 transcription factor Dp-2 (E2F dimerization partner 2)                      |
| GO | nucleus | 234 | 4735 | 0.14 | 7341 SMT3 suppressor of mif two 3 homolog 1 ( <i>S. cerevisiae</i> )             |
| GO | nucleus | 234 | 4735 | 0.14 | 7353 ubiquitin fusion degradation 1 like (yeast)                                 |
| GO | nucleus | 234 | 4735 | 0.14 | 7490 Wilms tumor 1                                                               |
| GO | nucleus | 234 | 4735 | 0.14 | 7552 zinc finger protein 711                                                     |
| GO | nucleus | 234 | 4735 | 0.14 | 7711 zinc finger protein 155                                                     |
| GO | nucleus | 234 | 4735 | 0.14 | 773 calcium channel, voltage-dependent, P/Q type, alpha 1A subunit               |
| GO | nucleus | 234 | 4735 | 0.14 | 79075 defective in sister chromatid cohesion 1 homolog ( <i>S. cerevisiae</i> )  |
| GO | nucleus | 234 | 4735 | 0.14 | 79172 centromere protein O                                                       |
| GO | nucleus | 234 | 4735 | 0.14 | 79187 fibronectin type III and SPRY domain containing 1                          |
| GO | nucleus | 234 | 4735 | 0.14 | 79677 structural maintenance of chromosomes 6                                    |
| GO | nucleus | 234 | 4735 | 0.14 | 79682 MLF1 interacting protein                                                   |
| GO | nucleus | 234 | 4735 | 0.14 | 79698 zinc finger, matrin type 4                                                 |
| GO | nucleus | 234 | 4735 | 0.14 | 79833 gem (nuclear organelle) associated protein 6                               |
| GO | nucleus | 234 | 4735 | 0.14 | 80712 ESX homeobox 1                                                             |
| GO | nucleus | 234 | 4735 | 0.14 | 8091 high mobility group AT-hook 2                                               |
| GO | nucleus | 234 | 4735 | 0.14 | 81606 limb bud and heart development homolog (mouse)                             |
| GO | nucleus | 234 | 4735 | 0.14 | 81786 tripartite motif-containing 7                                              |
| GO | nucleus | 234 | 4735 | 0.14 | 81892 chromosome 14 open reading frame 156                                       |
| GO | nucleus | 234 | 4735 | 0.14 | 8193 D4, zinc and double PHD fingers family 1                                    |
| GO | nucleus | 234 | 4735 | 0.14 | 8348 histone cluster 1, H2bo                                                     |
| GO | nucleus | 234 | 4735 | 0.14 | 8349 histone cluster 2, H2be                                                     |
| GO | nucleus | 234 | 4735 | 0.14 | 83879 cell division cycle associated 7                                           |
| GO | nucleus | 234 | 4735 | 0.14 | 8409 ubiquitously-expressed transcript                                           |
| GO | nucleus | 234 | 4735 | 0.14 | 84101 ubiquitin specific peptidase 44                                            |
| GO | nucleus | 234 | 4735 | 0.14 | 84172 polymerase (RNA) I polypeptide B, 128kDa                                   |
| GO | nucleus | 234 | 4735 | 0.14 | 84206 mex-3 homolog B ( <i>C. elegans</i> )                                      |
| GO | nucleus | 234 | 4735 | 0.14 | 84296 GINS complex subunit 4 (Sld5 homolog)                                      |
| GO | nucleus | 234 | 4735 | 0.14 | 84365 MKI67 (FHA domain) interacting nucleolar phosphoprotein                    |
| GO | nucleus | 234 | 4735 | 0.14 | 8458 transcription termination factor, RNA polymerase II                         |
| GO | nucleus | 234 | 4735 | 0.14 | 84622 zinc finger protein 594                                                    |
| GO | nucleus | 234 | 4735 | 0.14 | 84665 myopalladin                                                                |
| GO | nucleus | 234 | 4735 | 0.14 | 84878 zinc finger and BTB domain containing 45                                   |
| GO | nucleus | 234 | 4735 | 0.14 | 84959 ubiquitin associated and SH3 domain containing, B                          |
| GO | nucleus | 234 | 4735 | 0.14 | 8520 histone acetyltransferase 1                                                 |
| GO | nucleus | 234 | 4735 | 0.14 | 8533 COP9 constitutive photomorphogenic homolog subunit 3 ( <i>Arabidopsis</i> ) |

|    |                                  |     |      |       |       |                                                              |
|----|----------------------------------|-----|------|-------|-------|--------------------------------------------------------------|
| GO | nucleus                          | 234 | 4735 | 0.14  | 8536  | calcium/calmodulin-dependent protein kinase I                |
| GO | nucleus                          | 234 | 4735 | 0.14  | 8563  | THO complex 5                                                |
| GO | nucleus                          | 234 | 4735 | 0.14  | 8626  | tumor protein p63                                            |
| GO | nucleus                          | 234 | 4735 | 0.14  | 890   | cyclin A2                                                    |
| GO | nucleus                          | 234 | 4735 | 0.14  | 8970  | histone cluster 1, H2bj                                      |
| GO | nucleus                          | 234 | 4735 | 0.14  | 89797 | neuron navigator 2                                           |
| GO | nucleus                          | 234 | 4735 | 0.14  | 898   | cyclin E1                                                    |
| GO | nucleus                          | 234 | 4735 | 0.14  | 91442 | chromosome 19 open reading frame 40                          |
| GO | nucleus                          | 234 | 4735 | 0.14  | 91801 | alkB, alkylation repair homolog 8 (E. coli)                  |
| GO | nucleus                          | 234 | 4735 | 0.14  | 91975 | zinc finger protein 300                                      |
| GO | nucleus                          | 234 | 4735 | 0.14  | 92312 | mex-3 homolog A (C. elegans)                                 |
| GO | nucleus                          | 234 | 4735 | 0.14  | 9242  | musculin (activated B-cell factor-1)                         |
| GO | nucleus                          | 234 | 4735 | 0.14  | 9262  | serine/threonine kinase 17b                                  |
| GO | nucleus                          | 234 | 4735 | 0.14  | 93474 | zinc finger protein 670                                      |
| GO | nucleus                          | 234 | 4735 | 0.14  | 9355  | LIM homeobox 2                                               |
| GO | nucleus                          | 234 | 4735 | 0.14  | 93649 | myocardin                                                    |
| GO | nucleus                          | 234 | 4735 | 0.14  | 94241 | tumor protein p53 inducible nuclear protein 1                |
| GO | nucleus                          | 234 | 4735 | 0.14  | 9688  | nucleoporin 93kDa                                            |
| GO | nucleus                          | 234 | 4735 | 0.14  | 9805  | secernin 1                                                   |
| GO | nucleus                          | 234 | 4735 | 0.14  | 9839  | zinc finger E-box binding homeobox 2                         |
| GO | nucleus                          | 234 | 4735 | 0.14  | 9910  | RAB GTPase activating protein 1-like                         |
| GO | cellular calcium ion homeostasis | 5   | 60   | 0.145 | 2898  | glutamate receptor, ionotropic, kainate 2                    |
| GO | cellular calcium ion homeostasis | 5   | 60   | 0.145 | 348   | apolipoprotein E                                             |
| GO | cellular calcium ion homeostasis | 5   | 60   | 0.145 | 6347  | chemokine (C-C motif) ligand 2                               |
| GO | cellular calcium ion homeostasis | 5   | 60   | 0.145 | 6546  | solute carrier family 8 (sodium/calcium exchanger), member 1 |
| GO | cellular calcium ion homeostasis | 5   | 60   | 0.145 | 7137  | troponin I type 3 (cardiac)                                  |
| GO | pattern specification process    | 4   | 44   | 0.146 | 1045  | caudal type homeobox 2                                       |
| GO | pattern specification process    | 4   | 44   | 0.146 | 2736  | GLI family zinc finger 2                                     |
| GO | pattern specification process    | 4   | 44   | 0.146 | 3237  | homeobox D11                                                 |
| GO | pattern specification process    | 4   | 44   | 0.146 | 8626  | tumor protein p63                                            |
| GO | ubiquitin protein ligase binding | 4   | 44   | 0.146 | 2898  | glutamate receptor, ionotropic, kainate 2                    |
| GO | ubiquitin protein ligase binding | 4   | 44   | 0.146 | 409   | arrestin, beta 2                                             |
| GO | ubiquitin protein ligase binding | 4   | 44   | 0.146 | 56852 | RAD18 homolog (S. cerevisiae)                                |
| GO | ubiquitin protein ligase binding | 4   | 44   | 0.146 | 7046  | transforming growth factor, beta receptor 1                  |
| GO | scavenger receptor activity      | 4   | 44   | 0.146 | 56241 | sushi domain containing 2                                    |
| GO | scavenger receptor activity      | 4   | 44   | 0.146 | 7113  | transmembrane protease, serine 2                             |

|    |                                            |    |     |       |        |                                                                          |
|----|--------------------------------------------|----|-----|-------|--------|--------------------------------------------------------------------------|
| GO | scavenger receptor activity                | 4  | 44  | 0.146 | 81035  | collectin sub-family member 12                                           |
| GO | scavenger receptor activity                | 4  | 44  | 0.146 | 8685   | macrophage receptor with collagenous structure                           |
| GO | protein homotetramerization                | 3  | 29  | 0.15  | 2878   | glutathione peroxidase 3 (plasma)                                        |
| GO | protein homotetramerization                | 3  | 29  | 0.15  | 3028   | hydroxysteroid (17-beta) dehydrogenase 10                                |
| GO | protein homotetramerization                | 3  | 29  | 0.15  | 8626   | tumor protein p63                                                        |
| GO | androgen receptor binding                  | 3  | 29  | 0.15  | 29893  | PSMC3 interacting protein                                                |
| GO | androgen receptor binding                  | 3  | 29  | 0.15  | 672    | breast cancer 1, early onset                                             |
| GO | androgen receptor binding                  | 3  | 29  | 0.15  | 898    | cyclin E1                                                                |
| GO | metanephros development                    | 3  | 29  | 0.15  | 3237   | homeobox D11                                                             |
| GO | metanephros development                    | 3  | 29  | 0.15  | 4763   | neurofibromin 1                                                          |
| GO | metanephros development                    | 3  | 29  | 0.15  | 7490   | Wilms tumor 1                                                            |
| GO | chaperone binding                          | 3  | 29  | 0.15  | 332    | baculoviral IAP repeat-containing 5                                      |
| GO | chaperone binding                          | 3  | 29  | 0.15  | 3336   | heat shock 10kDa protein 1 (chaperonin 10)                               |
| GO | chaperone binding                          | 3  | 29  | 0.15  | 5203   | prefoldin subunit 4                                                      |
| GO | ruffle membrane                            | 3  | 29  | 0.15  | 3936   | lymphocyte cytosolic protein 1 (L-plastin)                               |
| GO | ruffle membrane                            | 3  | 29  | 0.15  | 5341   | pleckstrin                                                               |
| GO | ruffle membrane                            | 3  | 29  | 0.15  | 7168   | tropomyosin 1 (alpha)                                                    |
| GO | neuronal cell body                         | 10 | 148 | 0.151 | 1136   | cholinergic receptor, nicotinic, alpha 3                                 |
| GO | neuronal cell body                         | 10 | 148 | 0.151 | 1138   | cholinergic receptor, nicotinic, alpha 5                                 |
| GO | neuronal cell body                         | 10 | 148 | 0.151 | 114757 | cytoglobin                                                               |
| GO | neuronal cell body                         | 10 | 148 | 0.151 | 1984   | eukaryotic translation initiation factor 5A                              |
| GO | neuronal cell body                         | 10 | 148 | 0.151 | 2045   | EPH receptor A7                                                          |
| GO | neuronal cell body                         | 10 | 148 | 0.151 | 348    | apolipoprotein E                                                         |
| GO | neuronal cell body                         | 10 | 148 | 0.151 | 3751   | potassium voltage-gated channel, Shal-related subfamily, member 2        |
| GO | neuronal cell body                         | 10 | 148 | 0.151 | 6347   | chemokine (C-C motif) ligand 2                                           |
| GO | neuronal cell body                         | 10 | 148 | 0.151 | 8997   | kalirin, RhoGEF kinase                                                   |
| GO | neuronal cell body                         | 10 | 148 | 0.151 | 92737  | delta/notch-like EGF repeat containing                                   |
| GO | cellular response to extracellular stimuli | 2  | 15  | 0.152 | 1026   | cyclin-dependent kinase inhibitor 1A (p21, Cip1)                         |
| GO | cellular response to extracellular stimuli | 2  | 15  | 0.152 | 558    | AXL receptor tyrosine kinase                                             |
| GO | neural tube development                    | 2  | 15  | 0.152 | 10512  | sema domain, immunoglobulin domain (Ig), short basic domain, secreted, ( |
| GO | neural tube development                    | 2  | 15  | 0.152 | 2736   | GLI family zinc finger 2                                                 |
| GO | protein disulfide oxidoreductase activity  | 2  | 15  | 0.152 | 10539  | glutaredoxin 3                                                           |
| GO | protein disulfide oxidoreductase activity  | 2  | 15  | 0.152 | 51218  | glutaredoxin 5                                                           |
| GO | acyl-CoA binding                           | 2  | 15  | 0.152 | 1622   | diazepam binding inhibitor (GABA receptor modulator, acyl-Coenzyme A bi  |
| GO | acyl-CoA binding                           | 2  | 15  | 0.152 | 414149 | acyl-Coenzyme A binding domain containing 7                              |
| GO | cellular component organization            | 2  | 15  | 0.152 | 1730   | diaphanous homolog 2 (Drosophila)                                        |

|    |                                         |    |     |       |        |                                                             |
|----|-----------------------------------------|----|-----|-------|--------|-------------------------------------------------------------|
| GO | cellular component organization         | 2  | 15  | 0.152 | 81624  | diaphanous homolog 3 (Drosophila)                           |
| GO | estrogen receptor binding               | 2  | 15  | 0.152 | 29893  | PSMC3 interacting protein                                   |
| GO | estrogen receptor binding               | 2  | 15  | 0.152 | 5469   | mediator complex subunit 1                                  |
| GO | protein amino acid methylation          | 2  | 15  | 0.152 | 3276   | protein arginine methyltransferase 1                        |
| GO | protein amino acid methylation          | 2  | 15  | 0.152 | 5110   | protein-L-isoaspartate (D-aspartate) O-methyltransferase    |
| GO | male germ cell nucleus                  | 2  | 15  | 0.152 | 4292   | mutL homolog 1, colon cancer, nonpolyposis type 2 (E. coli) |
| GO | male germ cell nucleus                  | 2  | 15  | 0.152 | 641    | Bloom syndrome, RecQ helicase-like                          |
| GO | phosphatidylinositol-4,5-bisphosphate t | 2  | 15  | 0.152 | 54843  | synaptotagmin-like 2                                        |
| GO | phosphatidylinositol-4,5-bisphosphate t | 2  | 15  | 0.152 | 55803  | ArfGAP with dual PH domains 2                               |
| GO | double-strand break repair via homolog  | 2  | 15  | 0.152 | 641    | Bloom syndrome, RecQ helicase-like                          |
| GO | double-strand break repair via homolog  | 2  | 15  | 0.152 | 672    | breast cancer 1, early onset                                |
| GO | actin filament-based movement           | 2  | 15  | 0.152 | 70     | actin, alpha, cardiac muscle 1                              |
| GO | actin filament-based movement           | 2  | 15  | 0.152 | 7456   | WAS/WASL interacting protein family, member 1               |
| GO | ATP-dependent helicase activity         | 5  | 61  | 0.153 | 10212  | DEAD (Asp-Glu-Ala-Asp) box polypeptide 39                   |
| GO | ATP-dependent helicase activity         | 5  | 61  | 0.153 | 11056  | DEAD (Asp-Glu-Ala-Asp) box polypeptide 52                   |
| GO | ATP-dependent helicase activity         | 5  | 61  | 0.153 | 641    | Bloom syndrome, RecQ helicase-like                          |
| GO | ATP-dependent helicase activity         | 5  | 61  | 0.153 | 84319  | chromosome 3 open reading frame 26                          |
| GO | ATP-dependent helicase activity         | 5  | 61  | 0.153 | 8458   | transcription termination factor, RNA polymerase II         |
| GO | axonogenesis                            | 5  | 61  | 0.153 | 1496   | catenin (cadherin-associated protein), alpha 2              |
| GO | axonogenesis                            | 5  | 61  | 0.153 | 4897   | neuronal cell adhesion molecule                             |
| GO | axonogenesis                            | 5  | 61  | 0.153 | 51062  | atlastin GTPase 1                                           |
| GO | axonogenesis                            | 5  | 61  | 0.153 | 84189  | SLIT and NTRK-like family, member 6                         |
| GO | axonogenesis                            | 5  | 61  | 0.153 | 8997   | kalirin, RhoGEF kinase                                      |
| GO | protein tyrosine kinase activity        | 6  | 78  | 0.154 | 2045   | EPH receptor A7                                             |
| GO | protein tyrosine kinase activity        | 6  | 78  | 0.154 | 2242   | feline sarcoma oncogene                                     |
| GO | protein tyrosine kinase activity        | 6  | 78  | 0.154 | 2264   | fibroblast growth factor receptor 4                         |
| GO | protein tyrosine kinase activity        | 6  | 78  | 0.154 | 2534   | FYN oncogene related to SRC, FGR, YES                       |
| GO | protein tyrosine kinase activity        | 6  | 78  | 0.154 | 3932   | lymphocyte-specific protein tyrosine kinase                 |
| GO | protein tyrosine kinase activity        | 6  | 78  | 0.154 | 7010   | TEK tyrosine kinase, endothelial                            |
| GO | proteinaceous extracellular matrix      | 14 | 223 | 0.157 | 10893  | matrix metalloproteinase 24 (membrane-inserted)             |
| GO | proteinaceous extracellular matrix      | 14 | 223 | 0.157 | 115908 | collagen triple helix repeat containing 1                   |
| GO | proteinaceous extracellular matrix      | 14 | 223 | 0.157 | 145864 | hyaluronan and proteoglycan link protein 3                  |
| GO | proteinaceous extracellular matrix      | 14 | 223 | 0.157 | 1690   | coagulation factor C homolog, cochlin (Limulus polyphemus)  |
| GO | proteinaceous extracellular matrix      | 14 | 223 | 0.157 | 221044 | upper zone of growth plate and cartilage matrix associated  |
| GO | proteinaceous extracellular matrix      | 14 | 223 | 0.157 | 23768  | fibronectin leucine rich transmembrane protein 2            |
| GO | proteinaceous extracellular matrix      | 14 | 223 | 0.157 | 4052   | latent transforming growth factor beta binding protein 1    |

|    |                                      |    |     |       |                                                                                                               |
|----|--------------------------------------|----|-----|-------|---------------------------------------------------------------------------------------------------------------|
| GO | proteinaceous extracellular matrix   | 14 | 223 | 0.157 | 4060 lumican                                                                                                  |
| GO | proteinaceous extracellular matrix   | 14 | 223 | 0.157 | 4312 matrix metallopeptidase 1 (interstitial collagenase)                                                     |
| GO | proteinaceous extracellular matrix   | 14 | 223 | 0.157 | 4318 matrix metallopeptidase 9 (gelatinase B, 92kDa gelatinase, 92kDa type IV collagenase)                    |
| GO | proteinaceous extracellular matrix   | 14 | 223 | 0.157 | 4319 matrix metallopeptidase 10 (stromelysin 2)                                                               |
| GO | proteinaceous extracellular matrix   | 14 | 223 | 0.157 | 6695 sparc/osteonectin, cwcv and kazal-like domains proteoglycan (testican) 1                                 |
| GO | proteinaceous extracellular matrix   | 14 | 223 | 0.157 | 7481 wingless-type MMTV integration site family, member 11                                                    |
| GO | proteinaceous extracellular matrix   | 14 | 223 | 0.157 | 81029 wingless-type MMTV integration site family, member 5B                                                   |
| GO | multicellular organismal development | 48 | 890 | 0.157 | 10683 delta-like 3 (Drosophila)                                                                               |
| GO | multicellular organismal development | 48 | 890 | 0.157 | 10761 placenta-specific 1                                                                                     |
| GO | multicellular organismal development | 48 | 890 | 0.157 | 11149 blood vessel epicardial substance                                                                       |
| GO | multicellular organismal development | 48 | 890 | 0.157 | 120114 FAT tumor suppressor homolog 3 (Drosophila)                                                            |
| GO | multicellular organismal development | 48 | 890 | 0.157 | 132671 spermatogenesis associated 18 homolog (rat)                                                            |
| GO | multicellular organismal development | 48 | 890 | 0.157 | 1496 catenin (cadherin-associated protein), alpha 2                                                           |
| GO | multicellular organismal development | 48 | 890 | 0.157 | 1730 diaphanous homolog 2 (Drosophila)                                                                        |
| GO | multicellular organismal development | 48 | 890 | 0.157 | 1746 distal-less homeobox 2                                                                                   |
| GO | multicellular organismal development | 48 | 890 | 0.157 | 182 jagged 1 (Alagille syndrome)                                                                              |
| GO | multicellular organismal development | 48 | 890 | 0.157 | 2139 eyes absent homolog 2 (Drosophila)                                                                       |
| GO | multicellular organismal development | 48 | 890 | 0.157 | 2242 feline sarcoma oncogene                                                                                  |
| GO | multicellular organismal development | 48 | 890 | 0.157 | 2273 four and a half LIM domains 1                                                                            |
| GO | multicellular organismal development | 48 | 890 | 0.157 | 2321 fms-related tyrosine kinase 1 (vascular endothelial growth factor/vascular permeability factor receptor) |
| GO | multicellular organismal development | 48 | 890 | 0.157 | 23432 G protein-coupled receptor 161                                                                          |
| GO | multicellular organismal development | 48 | 890 | 0.157 | 23705 cell adhesion molecule 1                                                                                |
| GO | multicellular organismal development | 48 | 890 | 0.157 | 2534 FYN oncogene related to SRC, FGR, YES                                                                    |
| GO | multicellular organismal development | 48 | 890 | 0.157 | 25884 chordin-like 2                                                                                          |
| GO | multicellular organismal development | 48 | 890 | 0.157 | 266727 MAM domain containing glycosylphosphatidylinositol anchor 1                                            |
| GO | multicellular organismal development | 48 | 890 | 0.157 | 3149 high-mobility group box 3                                                                                |
| GO | multicellular organismal development | 48 | 890 | 0.157 | 3224 homeobox C8                                                                                              |
| GO | multicellular organismal development | 48 | 890 | 0.157 | 3236 homeobox D10                                                                                             |
| GO | multicellular organismal development | 48 | 890 | 0.157 | 344191 even-skipped homeobox 2                                                                                |
| GO | multicellular organismal development | 48 | 890 | 0.157 | 4291 myeloid leukemia factor 1                                                                                |
| GO | multicellular organismal development | 48 | 890 | 0.157 | 5015 orthodenticle homeobox 2                                                                                 |
| GO | multicellular organismal development | 48 | 890 | 0.157 | 5081 paired box 7                                                                                             |
| GO | multicellular organismal development | 48 | 890 | 0.157 | 51339 dapper, antagonist of beta-catenin, homolog 1 (Xenopus laevis)                                          |
| GO | multicellular organismal development | 48 | 890 | 0.157 | 5228 placental growth factor                                                                                  |
| GO | multicellular organismal development | 48 | 890 | 0.157 | 5469 mediator complex subunit 1                                                                               |
| GO | multicellular organismal development | 48 | 890 | 0.157 | 54993 zinc finger and SCAN domain containing 2                                                                |

|    |                                      |    |     |       |                                                                                                      |
|----|--------------------------------------|----|-----|-------|------------------------------------------------------------------------------------------------------|
| GO | multicellular organismal development | 48 | 890 | 0.157 | 6422 secreted frizzled-related protein 1                                                             |
| GO | multicellular organismal development | 48 | 890 | 0.157 | 6474 short stature homeobox 2                                                                        |
| GO | multicellular organismal development | 48 | 890 | 0.157 | 65009 NDRG family member 4                                                                           |
| GO | multicellular organismal development | 48 | 890 | 0.157 | 6586 slit homolog 3 (Drosophila)                                                                     |
| GO | multicellular organismal development | 48 | 890 | 0.157 | 6591 snail homolog 2 (Drosophila)                                                                    |
| GO | multicellular organismal development | 48 | 890 | 0.157 | 6615 snail homolog 1 (Drosophila)                                                                    |
| GO | multicellular organismal development | 48 | 890 | 0.157 | 6683 spastin                                                                                         |
| GO | multicellular organismal development | 48 | 890 | 0.157 | 6695 sparco/osteonectin, cwcv and kazal-like domains proteoglycan (testican) 1                       |
| GO | multicellular organismal development | 48 | 890 | 0.157 | 7481 wingless-type MMTV integration site family, member 11                                           |
| GO | multicellular organismal development | 48 | 890 | 0.157 | 8091 high mobility group AT-hook 2                                                                   |
| GO | multicellular organismal development | 48 | 890 | 0.157 | 81029 wingless-type MMTV integration site family, member 5B                                          |
| GO | multicellular organismal development | 48 | 890 | 0.157 | 81606 limb bud and heart development homolog (mouse)                                                 |
| GO | multicellular organismal development | 48 | 890 | 0.157 | 8325 frizzled homolog 8 (Drosophila)                                                                 |
| GO | multicellular organismal development | 48 | 890 | 0.157 | 84620 ST6 beta-galactosamide alpha-2,6-sialyltransferase 2                                           |
| GO | multicellular organismal development | 48 | 890 | 0.157 | 8482 semaphorin 7A, GPI membrane anchor (John Milton Hagen blood group)                              |
| GO | multicellular organismal development | 48 | 890 | 0.157 | 8536 calcium/calmodulin-dependent protein kinase I                                                   |
| GO | multicellular organismal development | 48 | 890 | 0.157 | 8788 delta-like 1 homolog (Drosophila)                                                               |
| GO | multicellular organismal development | 48 | 890 | 0.157 | 91584 plexin A4                                                                                      |
| GO | multicellular organismal development | 48 | 890 | 0.157 | 9260 PDZ and LIM domain 7 (enigma)                                                                   |
| GO | cell differentiation                 | 27 | 474 | 0.16  | 10672 guanine nucleotide binding protein (G protein), alpha 13                                       |
| GO | cell differentiation                 | 27 | 474 | 0.16  | 10683 delta-like 3 (Drosophila)                                                                      |
| GO | cell differentiation                 | 27 | 474 | 0.16  | 132671 spermatogenesis associated 18 homolog (rat)                                                   |
| GO | cell differentiation                 | 27 | 474 | 0.16  | 1496 catenin (cadherin-associated protein), alpha 2                                                  |
| GO | cell differentiation                 | 27 | 474 | 0.16  | 1730 diaphanous homolog 2 (Drosophila)                                                               |
| GO | cell differentiation                 | 27 | 474 | 0.16  | 1746 distal-less homeobox 2                                                                          |
| GO | cell differentiation                 | 27 | 474 | 0.16  | 2273 four and a half LIM domains 1                                                                   |
| GO | cell differentiation                 | 27 | 474 | 0.16  | 2321 fms-related tyrosine kinase 1 (vascular endothelial growth factor/vascular permeability factor) |
| GO | cell differentiation                 | 27 | 474 | 0.16  | 23705 cell adhesion molecule 1                                                                       |
| GO | cell differentiation                 | 27 | 474 | 0.16  | 25884 chordin-like 2                                                                                 |
| GO | cell differentiation                 | 27 | 474 | 0.16  | 266727 MAM domain containing glycosylphosphatidylinositol anchor 1                                   |
| GO | cell differentiation                 | 27 | 474 | 0.16  | 2736 GLI family zinc finger 2                                                                        |
| GO | cell differentiation                 | 27 | 474 | 0.16  | 3624 inhibin, beta A                                                                                 |
| GO | cell differentiation                 | 27 | 474 | 0.16  | 3975 LIM homeobox 1                                                                                  |
| GO | cell differentiation                 | 27 | 474 | 0.16  | 4291 myeloid leukemia factor 1                                                                       |
| GO | cell differentiation                 | 27 | 474 | 0.16  | 4830 non-metastatic cells 1, protein (NM23A) expressed in                                            |
| GO | cell differentiation                 | 27 | 474 | 0.16  | 5228 placental growth factor                                                                         |

|    |                                          |    |     |       |                                                                                  |
|----|------------------------------------------|----|-----|-------|----------------------------------------------------------------------------------|
| GO | cell differentiation                     | 27 | 474 | 0.16  | 54993 zinc finger and SCAN domain containing 2                                   |
| GO | cell differentiation                     | 27 | 474 | 0.16  | 6422 secreted frizzled-related protein 1                                         |
| GO | cell differentiation                     | 27 | 474 | 0.16  | 65009 NDRG family member 4                                                       |
| GO | cell differentiation                     | 27 | 474 | 0.16  | 6586 slit homolog 3 (Drosophila)                                                 |
| GO | cell differentiation                     | 27 | 474 | 0.16  | 6683 spastin                                                                     |
| GO | cell differentiation                     | 27 | 474 | 0.16  | 8482 semaphorin 7A, GPI membrane anchor (John Milton Hagen blood group)          |
| GO | cell differentiation                     | 27 | 474 | 0.16  | 8536 calcium/calmodulin-dependent protein kinase I                               |
| GO | cell differentiation                     | 27 | 474 | 0.16  | 8563 THO complex 5                                                               |
| GO | cell differentiation                     | 27 | 474 | 0.16  | 8788 delta-like 1 homolog (Drosophila)                                           |
| GO | cell differentiation                     | 27 | 474 | 0.16  | 9260 PDZ and LIM domain 7 (enigma)                                               |
| GO | nuclear matrix                           | 5  | 62  | 0.16  | 1161 excision repair cross-complementing rodent repair deficiency, complement    |
| GO | nuclear matrix                           | 5  | 62  | 0.16  | 1788 DNA (cytosine-5-)-methyltransferase 3 alpha                                 |
| GO | nuclear matrix                           | 5  | 62  | 0.16  | 4287 ataxin 3                                                                    |
| GO | nuclear matrix                           | 5  | 62  | 0.16  | 55137 fidgetin                                                                   |
| GO | nuclear matrix                           | 5  | 62  | 0.16  | 641 Bloom syndrome, RecQ helicase-like                                           |
| GO | extracellular matrix organization        | 5  | 62  | 0.16  | 1284 collagen, type IV, alpha 2                                                  |
| GO | extracellular matrix organization        | 5  | 62  | 0.16  | 1288 collagen, type IV, alpha 6                                                  |
| GO | extracellular matrix organization        | 5  | 62  | 0.16  | 1301 collagen, type XI, alpha 1                                                  |
| GO | extracellular matrix organization        | 5  | 62  | 0.16  | 4318 matrix metalloproteinase 9 (gelatinase B, 92kDa gelatinase, 92kDa type IV c |
| GO | extracellular matrix organization        | 5  | 62  | 0.16  | 4763 neurofibromin 1                                                             |
| GO | response to organic nitrogen             | 3  | 30  | 0.161 | 1026 cyclin-dependent kinase inhibitor 1A (p21, Cip1)                            |
| GO | response to organic nitrogen             | 3  | 30  | 0.161 | 3157 3-hydroxy-3-methylglutaryl-Coenzyme A synthase 1 (soluble)                  |
| GO | response to organic nitrogen             | 3  | 30  | 0.161 | 898 cyclin E1                                                                    |
| GO | cellular response to insulin stimulus    | 4  | 46  | 0.164 | 10395 deleted in liver cancer 1                                                  |
| GO | cellular response to insulin stimulus    | 4  | 46  | 0.164 | 23305 acyl-CoA synthetase long-chain family member 6                             |
| GO | cellular response to insulin stimulus    | 4  | 46  | 0.164 | 5140 phosphodiesterase 3B, cGMP-inhibited                                        |
| GO | cellular response to insulin stimulus    | 4  | 46  | 0.164 | 57678 glycerol-3-phosphate acyltransferase, mitochondrial                        |
| GO | regulation of small GTPase mediated sig  | 4  | 46  | 0.164 | 10788 IQ motif containing GTPase activating protein 2                            |
| GO | regulation of small GTPase mediated sig  | 4  | 46  | 0.164 | 25780 RAS guanyl releasing protein 3 (calcium and DAG-regulated)                 |
| GO | regulation of small GTPase mediated sig  | 4  | 46  | 0.164 | 4763 neurofibromin 1                                                             |
| GO | regulation of small GTPase mediated sig  | 4  | 46  | 0.164 | 5924 Ras protein-specific guanine nucleotide-releasing factor 2                  |
| GO | extracellular ligand-gated ion channel a | 4  | 46  | 0.164 | 1136 cholinergic receptor, nicotinic, alpha 3                                    |
| GO | extracellular ligand-gated ion channel a | 4  | 46  | 0.164 | 1138 cholinergic receptor, nicotinic, alpha 5                                    |
| GO | extracellular ligand-gated ion channel a | 4  | 46  | 0.164 | 200959 gamma-aminobutyric acid (GABA) receptor, rho 3                            |
| GO | extracellular ligand-gated ion channel a | 4  | 46  | 0.164 | 2558 gamma-aminobutyric acid (GABA) A receptor, alpha 5                          |
| GO | response to calcium ion                  | 4  | 46  | 0.164 | 3778 potassium large conductance calcium-activated channel, subfamily M, alph    |

|    |                                           |    |     |       |        |                                                                               |
|----|-------------------------------------------|----|-----|-------|--------|-------------------------------------------------------------------------------|
| GO | response to calcium ion                   | 4  | 46  | 0.164 | 4734   | neural precursor cell expressed, developmentally down-regulated 4             |
| GO | response to calcium ion                   | 4  | 46  | 0.164 | 7220   | transient receptor potential cation channel, subfamily C, member 1            |
| GO | response to calcium ion                   | 4  | 46  | 0.164 | 8604   | solute carrier family 25 (mitochondrial carrier, Aralar), member 12           |
| GO | organ morphogenesis                       | 8  | 115 | 0.166 | 1045   | caudal type homeobox 2                                                        |
| GO | organ morphogenesis                       | 8  | 115 | 0.166 | 182    | jagged 1 (Alagille syndrome)                                                  |
| GO | organ morphogenesis                       | 8  | 115 | 0.166 | 2273   | four and a half LIM domains 1                                                 |
| GO | organ morphogenesis                       | 8  | 115 | 0.166 | 3975   | LIM homeobox 1                                                                |
| GO | organ morphogenesis                       | 8  | 115 | 0.166 | 5469   | mediator complex subunit 1                                                    |
| GO | organ morphogenesis                       | 8  | 115 | 0.166 | 6347   | chemokine (C-C motif) ligand 2                                                |
| GO | organ morphogenesis                       | 8  | 115 | 0.166 | 6586   | slit homolog 3 (Drosophila)                                                   |
| GO | organ morphogenesis                       | 8  | 115 | 0.166 | 8626   | tumor protein p63                                                             |
| GO | regulation of transcription from RNA po   | 13 | 207 | 0.167 | 10474  | transcriptional adaptor 3                                                     |
| GO | regulation of transcription from RNA po   | 13 | 207 | 0.167 | 11278  | Kruppel-like factor 12                                                        |
| GO | regulation of transcription from RNA po   | 13 | 207 | 0.167 | 116931 | mediator complex subunit 12-like                                              |
| GO | regulation of transcription from RNA po   | 13 | 207 | 0.167 | 170082 | transcription elongation factor A (SII) N-terminal and central domain contain |
| GO | regulation of transcription from RNA po   | 13 | 207 | 0.167 | 195828 | zinc finger protein 367                                                       |
| GO | regulation of transcription from RNA po   | 13 | 207 | 0.167 | 29128  | ubiquitin-like with PHD and ring finger domains 1                             |
| GO | regulation of transcription from RNA po   | 13 | 207 | 0.167 | 29842  | transcription factor CP2-like 1                                               |
| GO | regulation of transcription from RNA po   | 13 | 207 | 0.167 | 50485  | SWI/SNF related, matrix associated, actin dependent regulator of chromatin    |
| GO | regulation of transcription from RNA po   | 13 | 207 | 0.167 | 5216   | profilin 1                                                                    |
| GO | regulation of transcription from RNA po   | 13 | 207 | 0.167 | 6662   | SRY (sex determining region Y)-box 9                                          |
| GO | regulation of transcription from RNA po   | 13 | 207 | 0.167 | 672    | breast cancer 1, early onset                                                  |
| GO | regulation of transcription from RNA po   | 13 | 207 | 0.167 | 6899   | T-box 1                                                                       |
| GO | regulation of transcription from RNA po   | 13 | 207 | 0.167 | 7021   | transcription factor AP-2 beta (activating enhancer binding protein 2 beta)   |
| GO | gap junction                              | 2  | 16  | 0.169 | 10052  | gap junction protein, gamma 1, 45kDa                                          |
| GO | gap junction                              | 2  | 16  | 0.169 | 127534 | gap junction protein, beta 4, 30.3kDa                                         |
| GO | regulation of the force of heart contract | 2  | 16  | 0.169 | 10539  | glutaredoxin 3                                                                |
| GO | regulation of the force of heart contract | 2  | 16  | 0.169 | 6546   | solute carrier family 8 (sodium/calcium exchanger), member 1                  |
| GO | regulation of GTPase activity             | 2  | 16  | 0.169 | 1121   | choroideremia (Rab escort protein 1)                                          |
| GO | regulation of GTPase activity             | 2  | 16  | 0.169 | 25780  | RAS guanyl releasing protein 3 (calcium and DAG-regulated)                    |
| GO | nicotinic acetylcholine-activated cation- | 2  | 16  | 0.169 | 1136   | cholinergic receptor, nicotinic, alpha 3                                      |
| GO | nicotinic acetylcholine-activated cation- | 2  | 16  | 0.169 | 1138   | cholinergic receptor, nicotinic, alpha 5                                      |
| GO | nicotinic acetylcholine-gated receptor-c  | 2  | 16  | 0.169 | 1136   | cholinergic receptor, nicotinic, alpha 3                                      |
| GO | nicotinic acetylcholine-gated receptor-c  | 2  | 16  | 0.169 | 1138   | cholinergic receptor, nicotinic, alpha 5                                      |
| GO | purine nucleotide biosynthetic process    | 2  | 16  | 0.169 | 158    | adenylosuccinate lyase                                                        |
| GO | purine nucleotide biosynthetic process    | 2  | 16  | 0.169 | 2618   | phosphoribosylglycinamide formyltransferase, phosphoribosylglycinamide        |



|    |                                         |   |    |       |                                                                               |
|----|-----------------------------------------|---|----|-------|-------------------------------------------------------------------------------|
| GO | mitochondrial envelope                  | 2 | 16 | 0.169 | 2534 FYN oncogene related to SRC, FGR, YES                                    |
| GO | mitochondrial envelope                  | 2 | 16 | 0.169 | 55803 ArfGAP with dual PH domains 2                                           |
| GO | neuron apoptosis                        | 2 | 16 | 0.169 | 2898 glutamate receptor, ionotropic, kainate 2                                |
| GO | neuron apoptosis                        | 2 | 16 | 0.169 | 8626 tumor protein p63                                                        |
| GO | negative regulation of MAP kinase activ | 2 | 16 | 0.169 | 348 apolipoprotein E                                                          |
| GO | negative regulation of MAP kinase activ | 2 | 16 | 0.169 | 4763 neurofibromin 1                                                          |
| GO | carbonate dehydratase activity          | 2 | 16 | 0.169 | 377677 carbonic anhydrase XIII                                                |
| GO | carbonate dehydratase activity          | 2 | 16 | 0.169 | 767 carbonic anhydrase VIII                                                   |
| GO | DNA-dependent DNA replication initiati  | 2 | 16 | 0.169 | 4171 minichromosome maintenance complex component 2                           |
| GO | DNA-dependent DNA replication initiati  | 2 | 16 | 0.169 | 5000 origin recognition complex, subunit 4-like (yeast)                       |
| GO | cerebral cortex development             | 2 | 16 | 0.169 | 4763 neurofibromin 1                                                          |
| GO | cerebral cortex development             | 2 | 16 | 0.169 | 6657 SRY (sex determining region Y)-box 2                                     |
| GO | hair follicle morphogenesis             | 2 | 16 | 0.169 | 6615 snail homolog 1 (Drosophila)                                             |
| GO | hair follicle morphogenesis             | 2 | 16 | 0.169 | 8626 tumor protein p63                                                        |
| GO | spliceosome assembly                    | 2 | 16 | 0.169 | 6637 small nuclear ribonucleoprotein polypeptide G                            |
| GO | spliceosome assembly                    | 2 | 16 | 0.169 | 79833 gem (nuclear organelle) associated protein 6                            |
| GO | stereocilium                            | 2 | 16 | 0.169 | 9497 solute carrier family 4, sodium bicarbonate cotransporter, member 7      |
| GO | stereocilium                            | 2 | 16 | 0.169 | 9732 dedicator of cytokinesis 4                                               |
| GO | cellular component movement             | 7 | 98 | 0.171 | 10096 ARP3 actin-related protein 3 homolog (yeast)                            |
| GO | cellular component movement             | 7 | 98 | 0.171 | 10097 ARP2 actin-related protein 2 homolog (yeast)                            |
| GO | cellular component movement             | 7 | 98 | 0.171 | 10672 guanine nucleotide binding protein (G protein), alpha 13                |
| GO | cellular component movement             | 7 | 98 | 0.171 | 6695 sparc/osteonectin, cwcv and kazal-like domains proteoglycan (testican) 1 |
| GO | cellular component movement             | 7 | 98 | 0.171 | 7168 tropomyosin 1 (alpha)                                                    |
| GO | cellular component movement             | 7 | 98 | 0.171 | 7171 tropomyosin 4                                                            |
| GO | cellular component movement             | 7 | 98 | 0.171 | 7857 secretogranin II (chromogranin C)                                        |
| GO | mediator complex                        | 3 | 31 | 0.173 | 116931 mediator complex subunit 12-like                                       |
| GO | mediator complex                        | 3 | 31 | 0.173 | 51003 mediator complex subunit 31                                             |
| GO | mediator complex                        | 3 | 31 | 0.173 | 5469 mediator complex subunit 1                                               |
| GO | SMAD binding                            | 3 | 31 | 0.173 | 1290 collagen, type V, alpha 2                                                |
| GO | SMAD binding                            | 3 | 31 | 0.173 | 7046 transforming growth factor, beta receptor 1                              |
| GO | SMAD binding                            | 3 | 31 | 0.173 | 9839 zinc finger E-box binding homeobox 2                                     |
| GO | MAPKKK cascade                          | 3 | 31 | 0.173 | 25780 RAS guanyl releasing protein 3 (calcium and DAG-regulated)              |
| GO | MAPKKK cascade                          | 3 | 31 | 0.173 | 4763 neurofibromin 1                                                          |
| GO | MAPKKK cascade                          | 3 | 31 | 0.173 | 7857 secretogranin II (chromogranin C)                                        |
| GO | embryonic digit morphogenesis           | 3 | 31 | 0.173 | 2736 GLI family zinc finger 2                                                 |
| GO | embryonic digit morphogenesis           | 3 | 31 | 0.173 | 3237 homeobox D11                                                             |

|    |                                          |   |    |       |        |                                                                  |
|----|------------------------------------------|---|----|-------|--------|------------------------------------------------------------------|
| GO | embryonic digit morphogenesis            | 3 | 31 | 0.173 | 6299   | sal-like 1 (Drosophila)                                          |
| GO | ATPase activity, coupled to transmembr   | 3 | 31 | 0.173 | 340273 | ATP-binding cassette, sub-family B (MDR/TAP), member 5           |
| GO | ATPase activity, coupled to transmembr   | 3 | 31 | 0.173 | 51382  | ATPase, H+ transporting, lysosomal 34kDa, V1 subunit D           |
| GO | ATPase activity, coupled to transmembr   | 3 | 31 | 0.173 | 6833   | ATP-binding cassette, sub-family C (CFTR/MRP), member 8          |
| GO | keratinization                           | 3 | 31 | 0.173 | 353133 | late cornified envelope 1C                                       |
| GO | keratinization                           | 3 | 31 | 0.173 | 84518  | cornifelin                                                       |
| GO | keratinization                           | 3 | 31 | 0.173 | 84648  | late cornified envelope 3D                                       |
| GO | chromosome, centromeric region           | 4 | 47 | 0.173 | 1788   | DNA (cytosine-5-)-methyltransferase 3 alpha                      |
| GO | chromosome, centromeric region           | 4 | 47 | 0.173 | 332    | baculoviral IAP repeat-containing 5                              |
| GO | chromosome, centromeric region           | 4 | 47 | 0.173 | 387103 | centromere protein W                                             |
| GO | chromosome, centromeric region           | 4 | 47 | 0.173 | 79075  | defective in sister chromatid cohesion 1 homolog (S. cerevisiae) |
| GO | RPTP-like protein binding                | 1 | 4  | 0.173 | 1000   | cadherin 2, type 1, N-cadherin (neuronal)                        |
| GO | ATP-dependent protein binding            | 1 | 4  | 0.173 | 10055  | SUMO1 activating enzyme subunit 1                                |
| GO | phenylalanyl-tRNA aminoacylation         | 1 | 4  | 0.173 | 10056  | phenylalanyl-tRNA synthetase, beta subunit                       |
| GO | excitatory synapse                       | 1 | 4  | 0.173 | 10096  | ARP3 actin-related protein 3 homolog (yeast)                     |
| GO | positive regulation of programmed cell   | 1 | 4  | 0.173 | 1026   | cyclin-dependent kinase inhibitor 1A (p21, Cip1)                 |
| GO | hindbrain morphogenesis                  | 1 | 4  | 0.173 | 10395  | deleted in liver cancer 1                                        |
| GO | positive regulation of protein amino aci | 1 | 4  | 0.173 | 10395  | deleted in liver cancer 1                                        |
| GO | U4/U6 x U5 tri-snRNP complex             | 1 | 4  | 0.173 | 10465  | peptidylprolyl isomerase H (cyclophilin H)                       |
| GO | box C/D snoRNP complex                   | 1 | 4  | 0.173 | 10528  | NOP56 ribonucleoprotein homolog (yeast)                          |
| GO | compartment pattern formation            | 1 | 4  | 0.173 | 10683  | delta-like 3 (Drosophila)                                        |
| GO | protein amino acid geranylgeranylation   | 1 | 4  | 0.173 | 1121   | choroideremia (Rab escort protein 1)                             |
| GO | Rab geranylgeranyltransferase activity   | 1 | 4  | 0.173 | 1121   | choroideremia (Rab escort protein 1)                             |
| GO | regulation of dendrite morphogenesis     | 1 | 4  | 0.173 | 1136   | cholinergic receptor, nicotinic, alpha 3                         |
| GO | transmembrane receptor protein tyrosin   | 1 | 4  | 0.173 | 118788 | phosphoinositide-3-kinase adaptor protein 1                      |
| GO | TOR signaling pathway                    | 1 | 4  | 0.173 | 121268 | Ras homolog enriched in brain like 1                             |
| GO | 9-cis-retinoic acid biosynthetic process | 1 | 4  | 0.173 | 1543   | cytochrome P450, family 1, subfamily A, polypeptide 1            |
| GO | embryonic development ending in birth    | 1 | 4  | 0.173 | 1543   | cytochrome P450, family 1, subfamily A, polypeptide 1            |
| GO | hepatocyte differentiation               | 1 | 4  | 0.173 | 1543   | cytochrome P450, family 1, subfamily A, polypeptide 1            |
| GO | pyrimidine dimer repair                  | 1 | 4  | 0.173 | 1643   | damage-specific DNA binding protein 2, 48kDa                     |
| GO | inner ear receptor cell differentiation  | 1 | 4  | 0.173 | 1687   | deafness, autosomal dominant 5                                   |
| GO | methylation-dependent chromatin silen    | 1 | 4  | 0.173 | 1788   | DNA (cytosine-5-)-methyltransferase 3 alpha                      |
| GO | unmethylated CpG binding                 | 1 | 4  | 0.173 | 1788   | DNA (cytosine-5-)-methyltransferase 3 alpha                      |
| GO | U6 snRNA binding                         | 1 | 4  | 0.173 | 1984   | eukaryotic translation initiation factor 5A                      |
| GO | phosphopyruvate hydratase activity       | 1 | 4  | 0.173 | 2027   | enolase 3 (beta, muscle)                                         |
| GO | phosphopyruvate hydratase complex        | 1 | 4  | 0.173 | 2027   | enolase 3 (beta, muscle)                                         |

|    |                                                                 |   |   |       |        |                                                                                        |
|----|-----------------------------------------------------------------|---|---|-------|--------|----------------------------------------------------------------------------------------|
| GO | regulation of microtubule polymerization                        | 1 | 4 | 0.173 | 220134 | spindle and kinetochore associated complex subunit 1                                   |
| GO | paranode region of axon                                         | 1 | 4 | 0.173 | 23136  | erythrocyte membrane protein band 4.1-like 3                                           |
| GO | arachidonic acid binding                                        | 1 | 4 | 0.173 | 241    | arachidonate 5-lipoxygenase-activating protein                                         |
| GO | detection of mechanical stimulus involvement                    | 1 | 4 | 0.173 | 2534   | FYN oncogene related to SRC, FGR, YES                                                  |
| GO | fatty acid alpha-oxidation                                      | 1 | 4 | 0.173 | 26061  | 2-hydroxyacyl-CoA lyase 1                                                              |
| GO | hindgut morphogenesis                                           | 1 | 4 | 0.173 | 2736   | GLI family zinc finger 2                                                               |
| GO | mammary gland duct morphogenesis                                | 1 | 4 | 0.173 | 2736   | GLI family zinc finger 2                                                               |
| GO | smoothed signaling pathway involvement                          | 1 | 4 | 0.173 | 2736   | GLI family zinc finger 2                                                               |
| GO | procollagen-proline 4-dioxygenase activation                    | 1 | 4 | 0.173 | 283208 | prolyl 4-hydroxylase, alpha polypeptide III                                            |
| GO | ubiquitin conjugating enzyme binding                            | 1 | 4 | 0.173 | 2898   | glutamate receptor, ionotropic, kainate 2                                              |
| GO | epithelial cell maturation                                      | 1 | 4 | 0.173 | 29842  | transcription factor CP2-like 1                                                        |
| GO | positive regulation of exit from mitosis                        | 1 | 4 | 0.173 | 332    | baculoviral IAP repeat-containing 5                                                    |
| GO | protein complex localization                                    | 1 | 4 | 0.173 | 332    | baculoviral IAP repeat-containing 5                                                    |
| GO | regulation of cholesterol transport                             | 1 | 4 | 0.173 | 341    | apolipoprotein C-I                                                                     |
| GO | axon regeneration in the peripheral nerve                       | 1 | 4 | 0.173 | 348    | apolipoprotein E                                                                       |
| GO | Cdc42 protein signal transduction                               | 1 | 4 | 0.173 | 348    | apolipoprotein E                                                                       |
| GO | cGMP-mediated signaling                                         | 1 | 4 | 0.173 | 348    | apolipoprotein E                                                                       |
| GO | death-inducing signaling complex                                | 1 | 4 | 0.173 | 355    | Fas (TNF receptor superfamily, member 6)                                               |
| GO | megakaryocyte differentiation                                   | 1 | 4 | 0.173 | 3589   | interleukin 11                                                                         |
| GO | hemoglobin biosynthetic process                                 | 1 | 4 | 0.173 | 3624   | inhibin, beta A                                                                        |
| GO | negative regulation of follicle-stimulating hormone response    | 1 | 4 | 0.173 | 3624   | inhibin, beta A                                                                        |
| GO | negative regulation of macrophage differentiation               | 1 | 4 | 0.173 | 3624   | inhibin, beta A                                                                        |
| GO | apoptotic cell clearance                                        | 1 | 4 | 0.173 | 3685   | integrin, alpha V (vitronectin receptor, alpha polypeptide, antigen CD51)              |
| GO | negative regulation of lipid storage                            | 1 | 4 | 0.173 | 3685   | integrin, alpha V (vitronectin receptor, alpha polypeptide, antigen CD51)              |
| GO | negative regulation of lipid transport                          | 1 | 4 | 0.173 | 3685   | integrin, alpha V (vitronectin receptor, alpha polypeptide, antigen CD51)              |
| GO | G-protein activated inward rectifier potassium channel activity | 1 | 4 | 0.173 | 3763   | potassium inwardly-rectifying channel, subfamily J, member 6                           |
| GO | RNA 3'-end processing                                           | 1 | 4 | 0.173 | 389421 | lin-28 homolog B (C. elegans)                                                          |
| GO | negative regulation of appetite                                 | 1 | 4 | 0.173 | 3952   | leptin                                                                                 |
| GO | regulation of intestinal cholesterol absorption                 | 1 | 4 | 0.173 | 3952   | leptin                                                                                 |
| GO | pachytene                                                       | 1 | 4 | 0.173 | 4292   | mutL homolog 1, colon cancer, nonpolyposis type 2 (E. coli)                            |
| GO | forebrain neuron development                                    | 1 | 4 | 0.173 | 431707 | LIM homeobox 8                                                                         |
| GO | positive regulation of keratinocyte migration                   | 1 | 4 | 0.173 | 4318   | matrix metalloproteinase 9 (gelatinase B, 92kDa gelatinase, 92kDa type IV collagenase) |
| GO | somatic recombination of immunoglobulin genes                   | 1 | 4 | 0.173 | 4436   | mutS homolog 2, colon cancer, nonpolyposis type 1 (E. coli)                            |
| GO | progesterone receptor signaling pathway                         | 1 | 4 | 0.173 | 4734   | neural precursor cell expressed, developmentally down-regulated 4                      |
| GO | receptor catabolic process                                      | 1 | 4 | 0.173 | 4734   | neural precursor cell expressed, developmentally down-regulated 4                      |
| GO | positive regulation of adenylate cyclase activity               | 1 | 4 | 0.173 | 4763   | neurofibromin 1                                                                        |

|    |                                            |   |   |       |                                                                                    |
|----|--------------------------------------------|---|---|-------|------------------------------------------------------------------------------------|
| GO | positive regulation of Rac protein signal  | 1 | 4 | 0.173 | 4893 neuroblastoma RAS viral (v-ras) oncogene homolog                              |
| GO | ERK1 and ERK2 cascade                      | 1 | 4 | 0.173 | 5021 oxytocin receptor                                                             |
| GO | positive regulation of ion transport       | 1 | 4 | 0.173 | 5028 purinergic receptor P2Y, G-protein coupled, 1                                 |
| GO | cellular response to chemical stimulus     | 1 | 4 | 0.173 | 5054 serpin peptidase inhibitor, clade E (nexin, plasminogen activator inhibitor t |
| GO | Golgi cis cisterna                         | 1 | 4 | 0.173 | 51062 atlastin GTPase 1                                                            |
| GO | protein repair                             | 1 | 4 | 0.173 | 5110 protein-L-isoaspartate (D-aspartate) O-methyltransferase                      |
| GO | cytokine biosynthetic process              | 1 | 4 | 0.173 | 5125 proprotein convertase subtilisin/kexin type 5                                 |
| GO | nerve growth factor processing             | 1 | 4 | 0.173 | 5125 proprotein convertase subtilisin/kexin type 5                                 |
| GO | platelet aggregation                       | 1 | 4 | 0.173 | 5341 pleckstrin                                                                    |
| GO | positive regulation of platelet activation | 1 | 4 | 0.173 | 5341 pleckstrin                                                                    |
| GO | regulation of transcription from RNA po    | 1 | 4 | 0.173 | 5440 polymerase (RNA) II (DNA directed) polypeptide K, 7.0kDa                      |
| GO | peroxisome proliferator activated recep    | 1 | 4 | 0.173 | 5469 mediator complex subunit 1                                                    |
| GO | retinoic acid receptor binding             | 1 | 4 | 0.173 | 5469 mediator complex subunit 1                                                    |
| GO | positive regulation of telomerase activit  | 1 | 4 | 0.173 | 55135 WD repeat containing, antisense to TP53                                      |
| GO | DNA primase activity                       | 1 | 4 | 0.173 | 5558 primase, DNA, polypeptide 2 (58kDa)                                           |
| GO | DNA replication, synthesis of RNA prime    | 1 | 4 | 0.173 | 5558 primase, DNA, polypeptide 2 (58kDa)                                           |
| GO | peptide-aspartate beta-dioxygenase act     | 1 | 4 | 0.173 | 57168 aspartate beta-hydroxylase domain containing 2                               |
| GO | glycerol-3-phosphate O-acyltransferase     | 1 | 4 | 0.173 | 57678 glycerol-3-phosphate acyltransferase, mitochondrial                          |
| GO | mitochondrial fusion                       | 1 | 4 | 0.173 | 581 BCL2-associated X protein                                                      |
| GO | regulation of protein heterodimerizatio    | 1 | 4 | 0.173 | 581 BCL2-associated X protein                                                      |
| GO | choline metabolic process                  | 1 | 4 | 0.173 | 590 butyrylcholinesterase                                                          |
| GO | outer ear morphogenesis                    | 1 | 4 | 0.173 | 6299 sal-like 1 (Drosophila)                                                       |
| GO | ventricular septum development             | 1 | 4 | 0.173 | 6299 sal-like 1 (Drosophila)                                                       |
| GO | monocyte chemotaxis                        | 1 | 4 | 0.173 | 6347 chemokine (C-C motif) ligand 2                                                |
| GO | positive regulation of macrophage chern    | 1 | 4 | 0.173 | 6347 chemokine (C-C motif) ligand 2                                                |
| GO | bubble DNA binding                         | 1 | 4 | 0.173 | 641 Bloom syndrome, RecQ helicase-like                                             |
| GO | lateral element                            | 1 | 4 | 0.173 | 641 Bloom syndrome, RecQ helicase-like                                             |
| GO | calcium ion transmembrane transporter      | 1 | 4 | 0.173 | 6546 solute carrier family 8 (sodium/calcium exchanger), member 1                  |
| GO | calcium:sodium antiporter activity         | 1 | 4 | 0.173 | 6546 solute carrier family 8 (sodium/calcium exchanger), member 1                  |
| GO | sodium ion transmembrane transporter       | 1 | 4 | 0.173 | 6546 solute carrier family 8 (sodium/calcium exchanger), member 1                  |
| GO | Roundabout binding                         | 1 | 4 | 0.173 | 6586 slit homolog 3 (Drosophila)                                                   |
| GO | lens induction in camera-type eye          | 1 | 4 | 0.173 | 6657 SRY (sex determining region Y)-box 2                                          |
| GO | Sertoli cell development                   | 1 | 4 | 0.173 | 6662 SRY (sex determining region Y)-box 9                                          |
| GO | intermediate filament cytoskeleton orga    | 1 | 4 | 0.173 | 667 dystonin                                                                       |
| GO | soft palate development                    | 1 | 4 | 0.173 | 6899 T-box 1                                                                       |
| GO | cardiac myofibril assembly                 | 1 | 4 | 0.173 | 70 actin, alpha, cardiac muscle 1                                                  |

|    |                                         |   |     |       |                                                                                 |
|----|-----------------------------------------|---|-----|-------|---------------------------------------------------------------------------------|
| GO | negative regulation of membrane prote   | 1 | 4   | 0.173 | 7078 TIMP metallopeptidase inhibitor 3                                          |
| GO | calcium channel inhibitor activity      | 1 | 4   | 0.173 | 7137 troponin I type 3 (cardiac)                                                |
| GO | negative regulation of ATPase activity  | 1 | 4   | 0.173 | 7137 troponin I type 3 (cardiac)                                                |
| GO | troponin C binding                      | 1 | 4   | 0.173 | 7137 troponin I type 3 (cardiac)                                                |
| GO | troponin T binding                      | 1 | 4   | 0.173 | 7137 troponin I type 3 (cardiac)                                                |
| GO | ISG15-protein conjugation               | 1 | 4   | 0.173 | 7324 ubiquitin-conjugating enzyme E2E 1 (UBC4/5 homolog, yeast)                 |
| GO | protein sumoylation                     | 1 | 4   | 0.173 | 7341 SMT3 suppressor of mif two 3 homolog 1 ( <i>S. cerevisiae</i> )            |
| GO | high voltage-gated calcium channel acti | 1 | 4   | 0.173 | 773 calcium channel, voltage-dependent, P/Q type, alpha 1A subunit              |
| GO | pantothenate kinase activity            | 1 | 4   | 0.173 | 79646 pantothenate kinase 3                                                     |
| GO | AT DNA binding                          | 1 | 4   | 0.173 | 8091 high mobility group AT-hook 2                                              |
| GO | galactose binding                       | 1 | 4   | 0.173 | 81035 collectin sub-family member 12                                            |
| GO | aspartate transport                     | 1 | 4   | 0.173 | 8604 solute carrier family 25 (mitochondrial carrier, Aralar), member 12        |
| GO | L-aspartate transmembrane transporter   | 1 | 4   | 0.173 | 8604 solute carrier family 25 (mitochondrial carrier, Aralar), member 12        |
| GO | urinary bladder development             | 1 | 4   | 0.173 | 8626 tumor protein p63                                                          |
| GO | growth hormone receptor binding         | 1 | 4   | 0.173 | 8835 suppressor of cytokine signaling 2                                         |
| GO | tRNA methylation                        | 1 | 4   | 0.173 | 91801 alkB, alkylation repair homolog 8 ( <i>E. coli</i> )                      |
| GO | cardiac cell differentiation            | 1 | 4   | 0.173 | 93649 myocardin                                                                 |
| GO | metabotropic glutamate receptor signal  | 1 | 4   | 0.173 | 9455 homer homolog 2 ( <i>Drosophila</i> )                                      |
| GO | NADP metabolic process                  | 1 | 4   | 0.173 | 9540 tumor protein p53 inducible protein 3                                      |
| GO | NADPH:quinone reductase activity        | 1 | 4   | 0.173 | 9540 tumor protein p53 inducible protein 3                                      |
| GO | heparan sulfate proteoglycan biosynthe  | 1 | 4   | 0.173 | 9653 heparan sulfate 2-O-sulfotransferase 1                                     |
| GO | cell proliferation in forebrain         | 1 | 4   | 0.173 | 9839 zinc finger E-box binding homeobox 2                                       |
| GO | embryonic morphogenesis                 | 1 | 4   | 0.173 | 9839 zinc finger E-box binding homeobox 2                                       |
| GO | chromatin                               | 6 | 81  | 0.174 | 4094 v-maf musculoaponeurotic fibrosarcoma oncogene homolog (avian)             |
| GO | chromatin                               | 6 | 81  | 0.174 | 4171 minichromosome maintenance complex component 2                             |
| GO | chromatin                               | 6 | 81  | 0.174 | 4734 neural precursor cell expressed, developmentally down-regulated 4          |
| GO | chromatin                               | 6 | 81  | 0.174 | 56852 RAD18 homolog ( <i>S. cerevisiae</i> )                                    |
| GO | chromatin                               | 6 | 81  | 0.174 | 79075 defective in sister chromatid cohesion 1 homolog ( <i>S. cerevisiae</i> ) |
| GO | chromatin                               | 6 | 81  | 0.174 | 8091 high mobility group AT-hook 2                                              |
| GO | Ras protein signal transduction         | 5 | 64  | 0.176 | 1026 cyclin-dependent kinase inhibitor 1A (p21, Cip1)                           |
| GO | Ras protein signal transduction         | 5 | 64  | 0.176 | 25780 RAS guanyl releasing protein 3 (calcium and DAG-regulated)                |
| GO | Ras protein signal transduction         | 5 | 64  | 0.176 | 4763 neurofibromin 1                                                            |
| GO | Ras protein signal transduction         | 5 | 64  | 0.176 | 4893 neuroblastoma RAS viral (v-ras) oncogene homolog                           |
| GO | Ras protein signal transduction         | 5 | 64  | 0.176 | 890 cyclin A2                                                                   |
| GO | kinase activity                         | 8 | 117 | 0.177 | 1716 deoxyguanosine kinase                                                      |
| GO | kinase activity                         | 8 | 117 | 0.177 | 1841 deoxythymidylate kinase (thymidylate kinase)                               |

|    |                                                          |   |     |       |        |                                                                                                                          |
|----|----------------------------------------------------------|---|-----|-------|--------|--------------------------------------------------------------------------------------------------------------------------|
| GO | kinase activity                                          | 8 | 117 | 0.177 | 27330  | ribosomal protein S6 kinase, 90kDa, polypeptide 6                                                                        |
| GO | kinase activity                                          | 8 | 117 | 0.177 | 29922  | non-metastatic cells 7, protein expressed in (nucleoside-diphosphate kinase)                                             |
| GO | kinase activity                                          | 8 | 117 | 0.177 | 4830   | non-metastatic cells 1, protein (NM23A) expressed in                                                                     |
| GO | kinase activity                                          | 8 | 117 | 0.177 | 54822  | transient receptor potential cation channel, subfamily M, member 7                                                       |
| GO | kinase activity                                          | 8 | 117 | 0.177 | 55577  | N-acetylglucosamine kinase                                                                                               |
| GO | kinase activity                                          | 8 | 117 | 0.177 | 64080  | ribokinase                                                                                                               |
| GO | nucleosome assembly                                      | 5 | 65  | 0.184 | 4171   | minichromosome maintenance complex component 2                                                                           |
| GO | nucleosome assembly                                      | 5 | 65  | 0.184 | 55506  | H2A histone family, member Y2                                                                                            |
| GO | nucleosome assembly                                      | 5 | 65  | 0.184 | 8348   | histone cluster 1, H2bo                                                                                                  |
| GO | nucleosome assembly                                      | 5 | 65  | 0.184 | 8349   | histone cluster 2, H2be                                                                                                  |
| GO | nucleosome assembly                                      | 5 | 65  | 0.184 | 8970   | histone cluster 1, H2bj                                                                                                  |
| GO | neural tube closure                                      | 3 | 32  | 0.184 | 10395  | deleted in liver cancer 1                                                                                                |
| GO | neural tube closure                                      | 3 | 32  | 0.184 | 5216   | profilin 1                                                                                                               |
| GO | neural tube closure                                      | 3 | 32  | 0.184 | 9839   | zinc finger E-box binding homeobox 2                                                                                     |
| GO | peptidyl-tyrosine phosphorylation                        | 3 | 32  | 0.184 | 2242   | feline sarcoma oncogene                                                                                                  |
| GO | peptidyl-tyrosine phosphorylation                        | 3 | 32  | 0.184 | 2321   | fms-related tyrosine kinase 1 (vascular endothelial growth factor/vascular permeability factor receptor tyrosine kinase) |
| GO | peptidyl-tyrosine phosphorylation                        | 3 | 32  | 0.184 | 2534   | FYN oncogene related to SRC, FGR, YES                                                                                    |
| GO | regulation of G-protein coupled receptor activity        | 3 | 32  | 0.184 | 2786   | guanine nucleotide binding protein (G protein), gamma 4                                                                  |
| GO | regulation of G-protein coupled receptor activity        | 3 | 32  | 0.184 | 6000   | regulator of G-protein signaling 7                                                                                       |
| GO | regulation of G-protein coupled receptor activity        | 3 | 32  | 0.184 | 8490   | regulator of G-protein signaling 5                                                                                       |
| GO | regulation of gene expression                            | 3 | 32  | 0.184 | 348    | apolipoprotein E                                                                                                         |
| GO | regulation of gene expression                            | 3 | 32  | 0.184 | 5744   | parathyroid hormone-like hormone                                                                                         |
| GO | regulation of gene expression                            | 3 | 32  | 0.184 | 6657   | SRY (sex determining region Y)-box 2                                                                                     |
| GO | positive regulation of cell differentiation              | 2 | 17  | 0.186 | 1045   | caudal type homeobox 2                                                                                                   |
| GO | positive regulation of cell differentiation              | 2 | 17  | 0.186 | 898    | cyclin E1                                                                                                                |
| GO | guanyl nucleotide binding                                | 2 | 17  | 0.186 | 10672  | guanine nucleotide binding protein (G protein), alpha 13                                                                 |
| GO | guanyl nucleotide binding                                | 2 | 17  | 0.186 | 2774   | guanine nucleotide binding protein (G protein), alpha activating activity polypeptide 1                                  |
| GO | regulation of excitatory postsynaptic membrane potential | 2 | 17  | 0.186 | 1136   | cholinergic receptor, nicotinic, alpha 3                                                                                 |
| GO | regulation of excitatory postsynaptic membrane potential | 2 | 17  | 0.186 | 2898   | glutamate receptor, ionotropic, kainate 2                                                                                |
| GO | positive regulation of DNA repair                        | 2 | 17  | 0.186 | 1161   | excision repair cross-complementing rodent repair deficiency, complementation group 1                                    |
| GO | positive regulation of DNA repair                        | 2 | 17  | 0.186 | 672    | breast cancer 1, early onset                                                                                             |
| GO | anchored to plasma membrane                              | 2 | 17  | 0.186 | 146760 | reticulon 4 receptor-like 1                                                                                              |
| GO | anchored to plasma membrane                              | 2 | 17  | 0.186 | 266727 | MAM domain containing glycosylphosphatidylinositol anchor 1                                                              |
| GO | purine ribonucleoside monophosphate biosynthetic process | 2 | 17  | 0.186 | 158    | adenylosuccinate lyase                                                                                                   |
| GO | purine ribonucleoside monophosphate biosynthetic process | 2 | 17  | 0.186 | 2618   | phosphoribosylglycinamide formyltransferase, phosphoribosylglycinamide succinyltransferase                               |
| GO | negative regulation of osteoblast differentiation        | 2 | 17  | 0.186 | 221044 | upper zone of growth plate and cartilage matrix associated                                                               |

|    |                                          |   |    |       |                                                                             |
|----|------------------------------------------|---|----|-------|-----------------------------------------------------------------------------|
| GO | negative regulation of osteoblast differ | 2 | 17 | 0.186 | 6657 SRY (sex determining region Y)-box 2                                   |
| GO | regulation of long-term neuronal synapi  | 2 | 17 | 0.186 | 2898 glutamate receptor, ionotropic, kainate 2                              |
| GO | regulation of long-term neuronal synapi  | 2 | 17 | 0.186 | 4893 neuroblastoma RAS viral (v-ras) oncogene homolog                       |
| GO | cytoplasmic microtubule                  | 2 | 17 | 0.186 | 332 baculoviral IAP repeat-containing 5                                     |
| GO | cytoplasmic microtubule                  | 2 | 17 | 0.186 | 7846 tubulin, alpha 1a                                                      |
| GO | DNA damage response, signal transduct    | 2 | 17 | 0.186 | 4292 mutL homolog 1, colon cancer, nonpolyposis type 2 (E. coli)            |
| GO | DNA damage response, signal transduct    | 2 | 17 | 0.186 | 672 breast cancer 1, early onset                                            |
| GO | cAMP binding                             | 2 | 17 | 0.186 | 50940 phosphodiesterase 11A                                                 |
| GO | cAMP binding                             | 2 | 17 | 0.186 | 5140 phosphodiesterase 3B, cGMP-inhibited                                   |
| GO | positive regulation of pathway-restrict  | 2 | 17 | 0.186 | 659 bone morphogenetic protein receptor, type II (serine/threonine kinase)  |
| GO | positive regulation of pathway-restrict  | 2 | 17 | 0.186 | 7046 transforming growth factor, beta receptor 1                            |
| GO | male genitalia development               | 2 | 17 | 0.186 | 6657 SRY (sex determining region Y)-box 2                                   |
| GO | male genitalia development               | 2 | 17 | 0.186 | 7490 Wilms tumor 1                                                          |
| GO | nucleobase, nucleoside, nucleotide and   | 5 | 66 | 0.192 | 1503 CTP synthase                                                           |
| GO | nucleobase, nucleoside, nucleotide and   | 5 | 66 | 0.192 | 1716 deoxyguanosine kinase                                                  |
| GO | nucleobase, nucleoside, nucleotide and   | 5 | 66 | 0.192 | 203 adenylate kinase 1                                                      |
| GO | nucleobase, nucleoside, nucleotide and   | 5 | 66 | 0.192 | 56339 methyltransferase like 3                                              |
| GO | nucleobase, nucleoside, nucleotide and   | 5 | 66 | 0.192 | 7298 thymidylate synthetase                                                 |
| GO | biosynthetic process                     | 4 | 49 | 0.192 | 23057 nicotinamide nucleotide adenyltransferase 2                           |
| GO | biosynthetic process                     | 4 | 49 | 0.192 | 2618 phosphoribosylglycinamide formyltransferase, phosphoribosylglycinamide |
| GO | biosynthetic process                     | 4 | 49 | 0.192 | 5833 phosphate cytidyltransferase 2, ethanolamine                           |
| GO | biosynthetic process                     | 4 | 49 | 0.192 | 79712 glycosyltransferase-like domain containing 1                          |
| GO | PDZ domain binding                       | 4 | 49 | 0.192 | 23705 cell adhesion molecule 1                                              |
| GO | PDZ domain binding                       | 4 | 49 | 0.192 | 2898 glutamate receptor, ionotropic, kainate 2                              |
| GO | PDZ domain binding                       | 4 | 49 | 0.192 | 9076 claudin 1                                                              |
| GO | PDZ domain binding                       | 4 | 49 | 0.192 | 9732 dedicator of cytokinesis 4                                             |
| GO | microtubule-based movement               | 6 | 84 | 0.195 | 1781 dynein, cytoplasmic 1, intermediate chain 2                            |
| GO | microtubule-based movement               | 6 | 84 | 0.195 | 347733 tubulin, beta 2B                                                     |
| GO | microtubule-based movement               | 6 | 84 | 0.195 | 3797 kinesin family member 3C                                               |
| GO | microtubule-based movement               | 6 | 84 | 0.195 | 3800 kinesin family member 5C                                               |
| GO | microtubule-based movement               | 6 | 84 | 0.195 | 7846 tubulin, alpha 1a                                                      |
| GO | microtubule-based movement               | 6 | 84 | 0.195 | 79861 tubulin, alpha-like 3                                                 |
| GO | actin filament binding                   | 4 | 50 | 0.202 | 3936 lymphocyte cytosolic protein 1 (L-plastin)                             |
| GO | actin filament binding                   | 4 | 50 | 0.202 | 8409 ubiquitously-expressed transcript                                      |
| GO | actin filament binding                   | 4 | 50 | 0.202 | 84168 anthrax toxin receptor 1                                              |
| GO | actin filament binding                   | 4 | 50 | 0.202 | 91624 nexilin (F actin binding protein)                                     |

|    |                                           |   |     |       |        |                                                                               |
|----|-------------------------------------------|---|-----|-------|--------|-------------------------------------------------------------------------------|
| GO | response to estrogen stimulus             | 4 | 50  | 0.202 | 411    | arylsulfatase B                                                               |
| GO | response to estrogen stimulus             | 4 | 50  | 0.202 | 672    | breast cancer 1, early onset                                                  |
| GO | response to estrogen stimulus             | 4 | 50  | 0.202 | 7046   | transforming growth factor, beta receptor 1                                   |
| GO | response to estrogen stimulus             | 4 | 50  | 0.202 | 7078   | TIMP metalloproteinase inhibitor 3                                            |
| GO | response to cytokine stimulus             | 4 | 50  | 0.202 | 5021   | oxytocin receptor                                                             |
| GO | response to cytokine stimulus             | 4 | 50  | 0.202 | 5054   | serpin peptidase inhibitor, clade E (nexin, plasminogen activator inhibitor t |
| GO | response to cytokine stimulus             | 4 | 50  | 0.202 | 6672   | SP100 nuclear antigen                                                         |
| GO | response to cytokine stimulus             | 4 | 50  | 0.202 | 898    | cyclin E1                                                                     |
| GO | rRNA processing                           | 6 | 85  | 0.202 | 10199  | M-phase phosphoprotein 10 (U3 small nucleolar ribonucleoprotein)              |
| GO | rRNA processing                           | 6 | 85  | 0.202 | 10528  | NOP56 ribonucleoprotein homolog (yeast)                                       |
| GO | rRNA processing                           | 6 | 85  | 0.202 | 345630 | fibrillarin-like 1                                                            |
| GO | rRNA processing                           | 6 | 85  | 0.202 | 5303   | protein (peptidylprolyl cis/trans isomerase) NIMA-interacting, 4 (parvulin)   |
| GO | rRNA processing                           | 6 | 85  | 0.202 | 55759  | WD repeat domain 12                                                           |
| GO | rRNA processing                           | 6 | 85  | 0.202 | 6154   | ribosomal protein L26                                                         |
| GO | inward rectifier potassium channel activ  | 2 | 18  | 0.203 | 3763   | potassium inwardly-rectifying channel, subfamily J, member 6                  |
| GO | inward rectifier potassium channel activ  | 2 | 18  | 0.203 | 56479  | potassium voltage-gated channel, KQT-like subfamily, member 5                 |
| GO | ADP binding                               | 2 | 18  | 0.203 | 4436   | mutS homolog 2, colon cancer, nonpolyposis type 1 (E. coli)                   |
| GO | ADP binding                               | 2 | 18  | 0.203 | 5028   | purinergic receptor P2Y, G-protein coupled, 1                                 |
| GO | proton-transporting ATPase activity, rot  | 2 | 18  | 0.203 | 51382  | ATPase, H+ transporting, lysosomal 34kDa, V1 subunit D                        |
| GO | proton-transporting ATPase activity, rot  | 2 | 18  | 0.203 | 528    | ATPase, H+ transporting, lysosomal 42kDa, V1 subunit C1                       |
| GO | hydrolase activity, acting on ester bond: | 2 | 18  | 0.203 | 55301  | oleoyl-ACP hydrolase                                                          |
| GO | hydrolase activity, acting on ester bond: | 2 | 18  | 0.203 | 92675  | D-tyrosyl-tRNA deacylase 1 homolog (S. cerevisiae)                            |
| GO | response to activity                      | 2 | 18  | 0.203 | 57678  | glycerol-3-phosphate acyltransferase, mitochondrial                           |
| GO | response to activity                      | 2 | 18  | 0.203 | 6347   | chemokine (C-C motif) ligand 2                                                |
| GO | negative regulation of apoptosis          | 9 | 140 | 0.204 | 10202  | dehydrogenase/reductase (SDR family) member 2                                 |
| GO | negative regulation of apoptosis          | 9 | 140 | 0.204 | 1026   | cyclin-dependent kinase inhibitor 1A (p21, Cip1)                              |
| GO | negative regulation of apoptosis          | 9 | 140 | 0.204 | 1984   | eukaryotic translation initiation factor 5A                                   |
| GO | negative regulation of apoptosis          | 9 | 140 | 0.204 | 5054   | serpin peptidase inhibitor, clade E (nexin, plasminogen activator inhibitor t |
| GO | negative regulation of apoptosis          | 9 | 140 | 0.204 | 5624   | protein C (inactivator of coagulation factors Va and VIIIa)                   |
| GO | negative regulation of apoptosis          | 9 | 140 | 0.204 | 6659   | SRY (sex determining region Y)-box 4                                          |
| GO | negative regulation of apoptosis          | 9 | 140 | 0.204 | 7046   | transforming growth factor, beta receptor 1                                   |
| GO | negative regulation of apoptosis          | 9 | 140 | 0.204 | 7490   | Wilms tumor 1                                                                 |
| GO | negative regulation of apoptosis          | 9 | 140 | 0.204 | 7857   | secretogranin II (chromogranin C)                                             |
| GO | calmodulin binding                        | 9 | 140 | 0.204 | 10788  | IQ motif containing GTPase activating protein 2                               |
| GO | calmodulin binding                        | 9 | 140 | 0.204 | 1264   | calponin 1, basic, smooth muscle                                              |
| GO | calmodulin binding                        | 9 | 140 | 0.204 | 3756   | potassium voltage-gated channel, subfamily H (eag-related), member 1          |



|    |                                     |    |     |       |                                                                                 |
|----|-------------------------------------|----|-----|-------|---------------------------------------------------------------------------------|
| GO | calmodulin binding                  | 9  | 140 | 0.204 | 4430 myosin IB                                                                  |
| GO | calmodulin binding                  | 9  | 140 | 0.204 | 6546 solute carrier family 8 (sodium/calcium exchanger), member 1               |
| GO | calmodulin binding                  | 9  | 140 | 0.204 | 6711 spectrin, beta, non-erythrocytic 1                                         |
| GO | calmodulin binding                  | 9  | 140 | 0.204 | 773 calcium channel, voltage-dependent, P/Q type, alpha 1A subunit              |
| GO | calmodulin binding                  | 9  | 140 | 0.204 | 79929 MAP6 domain containing 1                                                  |
| GO | calmodulin binding                  | 9  | 140 | 0.204 | 8536 calcium/calmodulin-dependent protein kinase I                              |
| GO | protein homooligomerization         | 5  | 68  | 0.208 | 3778 potassium large conductance calcium-activated channel, subfamily M, alpha  |
| GO | protein homooligomerization         | 5  | 68  | 0.208 | 51062 atlastin GTPase 1                                                         |
| GO | protein homooligomerization         | 5  | 68  | 0.208 | 581 BCL2-associated X protein                                                   |
| GO | protein homooligomerization         | 5  | 68  | 0.208 | 6683 spastin                                                                    |
| GO | protein homooligomerization         | 5  | 68  | 0.208 | 81035 collectin sub-family member 12                                            |
| GO | receptor signaling protein activity | 3  | 34  | 0.208 | 10293 TRAF interacting protein                                                  |
| GO | receptor signaling protein activity | 3  | 34  | 0.208 | 23768 fibronectin leucine rich transmembrane protein 2                          |
| GO | receptor signaling protein activity | 3  | 34  | 0.208 | 26230 T-cell lymphoma invasion and metastasis 2                                 |
| GO | cytokinesis                         | 3  | 34  | 0.208 | 1730 diaphanous homolog 2 (Drosophila)                                          |
| GO | cytokinesis                         | 3  | 34  | 0.208 | 23157 septin 6                                                                  |
| GO | cytokinesis                         | 3  | 34  | 0.208 | 332 baculoviral IAP repeat-containing 5                                         |
| GO | perikaryon                          | 3  | 34  | 0.208 | 2898 glutamate receptor, ionotropic, kainate 2                                  |
| GO | perikaryon                          | 3  | 34  | 0.208 | 50940 phosphodiesterase 11A                                                     |
| GO | perikaryon                          | 3  | 34  | 0.208 | 773 calcium channel, voltage-dependent, P/Q type, alpha 1A subunit              |
| GO | PML body                            | 3  | 34  | 0.208 | 641 Bloom syndrome, RecQ helicase-like                                          |
| GO | PML body                            | 3  | 34  | 0.208 | 6672 SP100 nuclear antigen                                                      |
| GO | PML body                            | 3  | 34  | 0.208 | 7341 SMT3 suppressor of mif two 3 homolog 1 (S. cerevisiae)                     |
| GO | transmembrane transport             | 27 | 492 | 0.211 | 1836 solute carrier family 26 (sulfate transporter), member 2                   |
| GO | transmembrane transport             | 27 | 492 | 0.211 | 1984 eukaryotic translation initiation factor 5A                                |
| GO | transmembrane transport             | 27 | 492 | 0.211 | 26519 translocase of inner mitochondrial membrane 10 homolog (yeast)            |
| GO | transmembrane transport             | 27 | 492 | 0.211 | 26521 translocase of inner mitochondrial membrane 8 homolog B (yeast)           |
| GO | transmembrane transport             | 27 | 492 | 0.211 | 340273 ATP-binding cassette, sub-family B (MDR/TAP), member 5                   |
| GO | transmembrane transport             | 27 | 492 | 0.211 | 3751 potassium voltage-gated channel, Shal-related subfamily, member 2          |
| GO | transmembrane transport             | 27 | 492 | 0.211 | 3754 potassium voltage-gated channel, subfamily F, member 1                     |
| GO | transmembrane transport             | 27 | 492 | 0.211 | 3756 potassium voltage-gated channel, subfamily H (eag-related), member 1       |
| GO | transmembrane transport             | 27 | 492 | 0.211 | 3778 potassium large conductance calcium-activated channel, subfamily M, alpha  |
| GO | transmembrane transport             | 27 | 492 | 0.211 | 387700 solute carrier family 16, member 12 (monocarboxylic acid transporter 12) |
| GO | transmembrane transport             | 27 | 492 | 0.211 | 4928 nucleoporin 98kDa                                                          |
| GO | transmembrane transport             | 27 | 492 | 0.211 | 54822 transient receptor potential cation channel, subfamily M, member 7        |
| GO | transmembrane transport             | 27 | 492 | 0.211 | 56479 potassium voltage-gated channel, KQT-like subfamily, member 5             |

|    |                         |     |      |       |        |                                                                              |
|----|-------------------------|-----|------|-------|--------|------------------------------------------------------------------------------|
| GO | transmembrane transport | 27  | 492  | 0.211 | 60386  | solute carrier family 25 (mitochondrial thiamine pyrophosphate carrier), m   |
| GO | transmembrane transport | 27  | 492  | 0.211 | 6335   | sodium channel, voltage-gated, type IX, alpha subunit                        |
| GO | transmembrane transport | 27  | 492  | 0.211 | 64393  | zinc finger, matrin type 3                                                   |
| GO | transmembrane transport | 27  | 492  | 0.211 | 64747  | major facilitator superfamily domain containing 1                            |
| GO | transmembrane transport | 27  | 492  | 0.211 | 6518   | solute carrier family 2 (facilitated glucose/fructose transporter), member 5 |
| GO | transmembrane transport | 27  | 492  | 0.211 | 6527   | solute carrier family 5 (low affinity glucose cotransporter), member 4       |
| GO | transmembrane transport | 27  | 492  | 0.211 | 6546   | solute carrier family 8 (sodium/calcium exchanger), member 1                 |
| GO | transmembrane transport | 27  | 492  | 0.211 | 6549   | solute carrier family 9 (sodium/hydrogen exchanger), member 2                |
| GO | transmembrane transport | 27  | 492  | 0.211 | 6580   | solute carrier family 22 (organic cation transporter), member 1              |
| GO | transmembrane transport | 27  | 492  | 0.211 | 6833   | ATP-binding cassette, sub-family C (CFTR/MRP), member 8                      |
| GO | transmembrane transport | 27  | 492  | 0.211 | 7220   | transient receptor potential cation channel, subfamily C, member 1           |
| GO | transmembrane transport | 27  | 492  | 0.211 | 773    | calcium channel, voltage-dependent, P/Q type, alpha 1A subunit               |
| GO | transmembrane transport | 27  | 492  | 0.211 | 8604   | solute carrier family 25 (mitochondrial carrier, Aralar), member 12          |
| GO | transmembrane transport | 27  | 492  | 0.211 | 9688   | nucleoporin 93kDa                                                            |
| GO | plasma membrane         | 137 | 2763 | 0.211 | 1000   | cadherin 2, type 1, N-cadherin (neuronal)                                    |
| GO | plasma membrane         | 137 | 2763 | 0.211 | 1002   | cadherin 4, type 1, R-cadherin (retinal)                                     |
| GO | plasma membrane         | 137 | 2763 | 0.211 | 10052  | gap junction protein, gamma 1, 45kDa                                         |
| GO | plasma membrane         | 137 | 2763 | 0.211 | 1008   | cadherin 10, type 2 (T2-cadherin)                                            |
| GO | plasma membrane         | 137 | 2763 | 0.211 | 10672  | guanine nucleotide binding protein (G protein), alpha 13                     |
| GO | plasma membrane         | 137 | 2763 | 0.211 | 10890  | RAB10, member RAS oncogene family                                            |
| GO | plasma membrane         | 137 | 2763 | 0.211 | 10893  | matrix metalloproteinase 24 (membrane-inserted)                              |
| GO | plasma membrane         | 137 | 2763 | 0.211 | 11149  | blood vessel epicardial substance                                            |
| GO | plasma membrane         | 137 | 2763 | 0.211 | 1136   | cholinergic receptor, nicotinic, alpha 3                                     |
| GO | plasma membrane         | 137 | 2763 | 0.211 | 1138   | cholinergic receptor, nicotinic, alpha 5                                     |
| GO | plasma membrane         | 137 | 2763 | 0.211 | 116372 | LY6/PLAUR domain containing 1                                                |
| GO | plasma membrane         | 137 | 2763 | 0.211 | 118788 | phosphoinositide-3-kinase adaptor protein 1                                  |
| GO | plasma membrane         | 137 | 2763 | 0.211 | 119749 | olfactory receptor, family 4, subfamily C, member 46                         |
| GO | plasma membrane         | 137 | 2763 | 0.211 | 120114 | FAT tumor suppressor homolog 3 (Drosophila)                                  |
| GO | plasma membrane         | 137 | 2763 | 0.211 | 121268 | Ras homolog enriched in brain like 1                                         |
| GO | plasma membrane         | 137 | 2763 | 0.211 | 122786 | FERM domain containing 6                                                     |
| GO | plasma membrane         | 137 | 2763 | 0.211 | 125962 | olfactory receptor, family 7, subfamily G, member 1                          |
| GO | plasma membrane         | 137 | 2763 | 0.211 | 127534 | gap junction protein, beta 4, 30.3kDa                                        |
| GO | plasma membrane         | 137 | 2763 | 0.211 | 128414 | Na <sup>+</sup> /K <sup>+</sup> transporting ATPase interacting 4            |
| GO | plasma membrane         | 137 | 2763 | 0.211 | 128853 | dual specificity phosphatase 15                                              |
| GO | plasma membrane         | 137 | 2763 | 0.211 | 131450 | CD200 receptor 1                                                             |
| GO | plasma membrane         | 137 | 2763 | 0.211 | 146760 | reticulon 4 receptor-like 1                                                  |

|    |                 |     |      |       |        |                                                                               |
|----|-----------------|-----|------|-------|--------|-------------------------------------------------------------------------------|
| GO | plasma membrane | 137 | 2763 | 0.211 | 1496   | catenin (cadherin-associated protein), alpha 2                                |
| GO | plasma membrane | 137 | 2763 | 0.211 | 154215 | Na <sup>+</sup> /K <sup>+</sup> transporting ATPase interacting 2             |
| GO | plasma membrane | 137 | 2763 | 0.211 | 1733   | deiodinase, iodothyronine, type I                                             |
| GO | plasma membrane | 137 | 2763 | 0.211 | 182    | jagged 1 (Alagille syndrome)                                                  |
| GO | plasma membrane | 137 | 2763 | 0.211 | 1830   | desmoglein 3 (pemphigus vulgaris antigen)                                     |
| GO | plasma membrane | 137 | 2763 | 0.211 | 200959 | gamma-aminobutyric acid (GABA) receptor, rho 3                                |
| GO | plasma membrane | 137 | 2763 | 0.211 | 2037   | erythrocyte membrane protein band 4.1-like 2                                  |
| GO | plasma membrane | 137 | 2763 | 0.211 | 2149   | coagulation factor II (thrombin) receptor                                     |
| GO | plasma membrane | 137 | 2763 | 0.211 | 2150   | coagulation factor II (thrombin) receptor-like 1                              |
| GO | plasma membrane | 137 | 2763 | 0.211 | 2151   | coagulation factor II (thrombin) receptor-like 2                              |
| GO | plasma membrane | 137 | 2763 | 0.211 | 222611 | G protein-coupled receptor 111                                                |
| GO | plasma membrane | 137 | 2763 | 0.211 | 2264   | fibroblast growth factor receptor 4                                           |
| GO | plasma membrane | 137 | 2763 | 0.211 | 23136  | erythrocyte membrane protein band 4.1-like 3                                  |
| GO | plasma membrane | 137 | 2763 | 0.211 | 2321   | fms-related tyrosine kinase 1 (vascular endothelial growth factor/vascular p  |
| GO | plasma membrane | 137 | 2763 | 0.211 | 23305  | acyl-CoA synthetase long-chain family member 6                                |
| GO | plasma membrane | 137 | 2763 | 0.211 | 23432  | G protein-coupled receptor 161                                                |
| GO | plasma membrane | 137 | 2763 | 0.211 | 23562  | claudin 14                                                                    |
| GO | plasma membrane | 137 | 2763 | 0.211 | 23705  | cell adhesion molecule 1                                                      |
| GO | plasma membrane | 137 | 2763 | 0.211 | 2534   | FYN oncogene related to SRC, FGR, YES                                         |
| GO | plasma membrane | 137 | 2763 | 0.211 | 2558   | gamma-aminobutyric acid (GABA) A receptor, alpha 5                            |
| GO | plasma membrane | 137 | 2763 | 0.211 | 26499  | pleckstrin 2                                                                  |
| GO | plasma membrane | 137 | 2763 | 0.211 | 266727 | MAM domain containing glycosylphosphatidylinositol anchor 1                   |
| GO | plasma membrane | 137 | 2763 | 0.211 | 27241  | Bardet-Biedl syndrome 9                                                       |
| GO | plasma membrane | 137 | 2763 | 0.211 | 27289  | Rho family GTPase 1                                                           |
| GO | plasma membrane | 137 | 2763 | 0.211 | 2774   | guanine nucleotide binding protein (G protein), alpha activating activity pol |
| GO | plasma membrane | 137 | 2763 | 0.211 | 2786   | guanine nucleotide binding protein (G protein), gamma 4                       |
| GO | plasma membrane | 137 | 2763 | 0.211 | 282770 | olfactory receptor, family 10, subfamily AG, member 1                         |
| GO | plasma membrane | 137 | 2763 | 0.211 | 283111 | olfactory receptor, family 51, subfamily V, member 1                          |
| GO | plasma membrane | 137 | 2763 | 0.211 | 2842   | G protein-coupled receptor 19                                                 |
| GO | plasma membrane | 137 | 2763 | 0.211 | 2845   | G protein-coupled receptor 22                                                 |
| GO | plasma membrane | 137 | 2763 | 0.211 | 2850   | G protein-coupled receptor 27                                                 |
| GO | plasma membrane | 137 | 2763 | 0.211 | 285659 | olfactory receptor, family 2, subfamily V, member 2                           |
| GO | plasma membrane | 137 | 2763 | 0.211 | 2863   | G protein-coupled receptor 39                                                 |
| GO | plasma membrane | 137 | 2763 | 0.211 | 287    | ankyrin 2, neuronal                                                           |
| GO | plasma membrane | 137 | 2763 | 0.211 | 2898   | glutamate receptor, ionotropic, kainate 2                                     |
| GO | plasma membrane | 137 | 2763 | 0.211 | 2906   | glutamate receptor, ionotropic, N-methyl D-aspartate 2D                       |

|    |                 |     |      |       |                                                                                     |
|----|-----------------|-----|------|-------|-------------------------------------------------------------------------------------|
| GO | plasma membrane | 137 | 2763 | 0.211 | 30011 SH3-domain kinase binding protein 1                                           |
| GO | plasma membrane | 137 | 2763 | 0.211 | 3028 hydroxysteroid (17-beta) dehydrogenase 10                                      |
| GO | plasma membrane | 137 | 2763 | 0.211 | 340273 ATP-binding cassette, sub-family B (MDR/TAP), member 5                       |
| GO | plasma membrane | 137 | 2763 | 0.211 | 344805 transmembrane protease, serine 7                                             |
| GO | plasma membrane | 137 | 2763 | 0.211 | 347902 adhesion molecule with Ig-like domain 2                                      |
| GO | plasma membrane | 137 | 2763 | 0.211 | 348 apolipoprotein E                                                                |
| GO | plasma membrane | 137 | 2763 | 0.211 | 353091 retinoic acid early transcript 1G                                            |
| GO | plasma membrane | 137 | 2763 | 0.211 | 355 Fas (TNF receptor superfamily, member 6)                                        |
| GO | plasma membrane | 137 | 2763 | 0.211 | 3685 integrin, alpha V (vitronectin receptor, alpha polypeptide, antigen CD51)      |
| GO | plasma membrane | 137 | 2763 | 0.211 | 3751 potassium voltage-gated channel, Shal-related subfamily, member 2              |
| GO | plasma membrane | 137 | 2763 | 0.211 | 3763 potassium inwardly-rectifying channel, subfamily J, member 6                   |
| GO | plasma membrane | 137 | 2763 | 0.211 | 3778 potassium large conductance calcium-activated channel, subfamily M, alpha      |
| GO | plasma membrane | 137 | 2763 | 0.211 | 387700 solute carrier family 16, member 12 (monocarboxylic acid transporter 12)     |
| GO | plasma membrane | 137 | 2763 | 0.211 | 390061 olfactory receptor, family 51, subfamily Q, member 1                         |
| GO | plasma membrane | 137 | 2763 | 0.211 | 391114 olfactory receptor, family 6, subfamily K, member 3                          |
| GO | plasma membrane | 137 | 2763 | 0.211 | 3932 lymphocyte-specific protein tyrosine kinase                                    |
| GO | plasma membrane | 137 | 2763 | 0.211 | 3936 lymphocyte cytosolic protein 1 (L-plastin)                                     |
| GO | plasma membrane | 137 | 2763 | 0.211 | 409 arrestin, beta 2                                                                |
| GO | plasma membrane | 137 | 2763 | 0.211 | 4158 melanocortin 2 receptor (adrenocorticotrophic hormone)                         |
| GO | plasma membrane | 137 | 2763 | 0.211 | 4734 neural precursor cell expressed, developmentally down-regulated 4              |
| GO | plasma membrane | 137 | 2763 | 0.211 | 4893 neuroblastoma RAS viral (v-ras) oncogene homolog                               |
| GO | plasma membrane | 137 | 2763 | 0.211 | 4897 neuronal cell adhesion molecule                                                |
| GO | plasma membrane | 137 | 2763 | 0.211 | 5021 oxytocin receptor                                                              |
| GO | plasma membrane | 137 | 2763 | 0.211 | 5028 purinergic receptor P2Y, G-protein coupled, 1                                  |
| GO | plasma membrane | 137 | 2763 | 0.211 | 5031 pyrimidinergic receptor P2Y, G-protein coupled, 6                              |
| GO | plasma membrane | 137 | 2763 | 0.211 | 5054 serpin peptidase inhibitor, clade E (nexin, plasminogen activator inhibitor 1) |
| GO | plasma membrane | 137 | 2763 | 0.211 | 5101 protocadherin 9                                                                |
| GO | plasma membrane | 137 | 2763 | 0.211 | 51177 pleckstrin homology domain containing, family O member 1                      |
| GO | plasma membrane | 137 | 2763 | 0.211 | 5145 phosphodiesterase 6A, cGMP-specific, rod, alpha                                |
| GO | plasma membrane | 137 | 2763 | 0.211 | 51768 transmembrane 7 superfamily member 3                                          |
| GO | plasma membrane | 137 | 2763 | 0.211 | 528 ATPase, H+ transporting, lysosomal 42kDa, V1 subunit C1                         |
| GO | plasma membrane | 137 | 2763 | 0.211 | 53637 sphingosine-1-phosphate receptor 5                                            |
| GO | plasma membrane | 137 | 2763 | 0.211 | 5420 podocalyxin-like                                                               |
| GO | plasma membrane | 137 | 2763 | 0.211 | 54210 triggering receptor expressed on myeloid cells 1                              |
| GO | plasma membrane | 137 | 2763 | 0.211 | 54331 guanine nucleotide binding protein (G protein), gamma 2                       |
| GO | plasma membrane | 137 | 2763 | 0.211 | 54756 interleukin 17 receptor D                                                     |

|    |                 |     |      |       |        |                                                                              |
|----|-----------------|-----|------|-------|--------|------------------------------------------------------------------------------|
| GO | plasma membrane | 137 | 2763 | 0.211 | 54822  | transient receptor potential cation channel, subfamily M, member 7           |
| GO | plasma membrane | 137 | 2763 | 0.211 | 54843  | synaptotagmin-like 2                                                         |
| GO | plasma membrane | 137 | 2763 | 0.211 | 55117  | solute carrier family 6 (neutral amino acid transporter), member 15          |
| GO | plasma membrane | 137 | 2763 | 0.211 | 55244  | solute carrier family 47, member 1                                           |
| GO | plasma membrane | 137 | 2763 | 0.211 | 55283  | mucolipin 3                                                                  |
| GO | plasma membrane | 137 | 2763 | 0.211 | 55803  | ArfGAP with dual PH domains 2                                                |
| GO | plasma membrane | 137 | 2763 | 0.211 | 56104  | protocadherin gamma subfamily B, 1                                           |
| GO | plasma membrane | 137 | 2763 | 0.211 | 56126  | protocadherin beta 10                                                        |
| GO | plasma membrane | 137 | 2763 | 0.211 | 56133  | protocadherin beta 2                                                         |
| GO | plasma membrane | 137 | 2763 | 0.211 | 5624   | protein C (inactivator of coagulation factors Va and VIIIa)                  |
| GO | plasma membrane | 137 | 2763 | 0.211 | 56937  | prostate transmembrane protein, androgen induced 1                           |
| GO | plasma membrane | 137 | 2763 | 0.211 | 57575  | protocadherin 10                                                             |
| GO | plasma membrane | 137 | 2763 | 0.211 | 5795   | protein tyrosine phosphatase, receptor type, J                               |
| GO | plasma membrane | 137 | 2763 | 0.211 | 5924   | Ras protein-specific guanine nucleotide-releasing factor 2                   |
| GO | plasma membrane | 137 | 2763 | 0.211 | 6000   | regulator of G-protein signaling 7                                           |
| GO | plasma membrane | 137 | 2763 | 0.211 | 6444   | sarcoglycan, delta (35kDa dystrophin-associated glycoprotein)                |
| GO | plasma membrane | 137 | 2763 | 0.211 | 6518   | solute carrier family 2 (facilitated glucose/fructose transporter), member 5 |
| GO | plasma membrane | 137 | 2763 | 0.211 | 6546   | solute carrier family 8 (sodium/calcium exchanger), member 1                 |
| GO | plasma membrane | 137 | 2763 | 0.211 | 6580   | solute carrier family 22 (organic cation transporter), member 1              |
| GO | plasma membrane | 137 | 2763 | 0.211 | 659    | bone morphogenetic protein receptor, type II (serine/threonine kinase)       |
| GO | plasma membrane | 137 | 2763 | 0.211 | 6711   | spectrin, beta, non-erythrocytic 1                                           |
| GO | plasma membrane | 137 | 2763 | 0.211 | 7010   | TEK tyrosine kinase, endothelial                                             |
| GO | plasma membrane | 137 | 2763 | 0.211 | 7037   | transferrin receptor (p90, CD71)                                             |
| GO | plasma membrane | 137 | 2763 | 0.211 | 7046   | transforming growth factor, beta receptor 1                                  |
| GO | plasma membrane | 137 | 2763 | 0.211 | 7113   | transmembrane protease, serine 2                                             |
| GO | plasma membrane | 137 | 2763 | 0.211 | 7220   | transient receptor potential cation channel, subfamily C, member 1           |
| GO | plasma membrane | 137 | 2763 | 0.211 | 729230 | chemokine (C-C motif) receptor 2                                             |
| GO | plasma membrane | 137 | 2763 | 0.211 | 773    | calcium channel, voltage-dependent, P/Q type, alpha 1A subunit               |
| GO | plasma membrane | 137 | 2763 | 0.211 | 83700  | junctional adhesion molecule 3                                               |
| GO | plasma membrane | 137 | 2763 | 0.211 | 84168  | anthrax toxin receptor 1                                                     |
| GO | plasma membrane | 137 | 2763 | 0.211 | 84552  | par-6 partitioning defective 6 homolog gamma (C. elegans)                    |
| GO | plasma membrane | 137 | 2763 | 0.211 | 8482   | semaphorin 7A, GPI membrane anchor (John Milton Hagen blood group)           |
| GO | plasma membrane | 137 | 2763 | 0.211 | 8777   | multiple PDZ domain protein                                                  |
| GO | plasma membrane | 137 | 2763 | 0.211 | 9053   | microtubule-associated protein 7                                             |
| GO | plasma membrane | 137 | 2763 | 0.211 | 9076   | claudin 1                                                                    |
| GO | plasma membrane | 137 | 2763 | 0.211 | 91584  | plexin A4                                                                    |

|    |                                           |     |      |       |        |                                                                               |
|----|-------------------------------------------|-----|------|-------|--------|-------------------------------------------------------------------------------|
| GO | plasma membrane                           | 137 | 2763 | 0.211 | 92737  | delta/notch-like EGF repeat containing                                        |
| GO | plasma membrane                           | 137 | 2763 | 0.211 | 9455   | homer homolog 2 (Drosophila)                                                  |
| GO | plasma membrane                           | 137 | 2763 | 0.211 | 9497   | solute carrier family 4, sodium bicarbonate cotransporter, member 7           |
| GO | plasma membrane                           | 137 | 2763 | 0.211 | 953    | ectonucleoside triphosphate diphosphohydrolase 1                              |
| GO | plasma membrane                           | 137 | 2763 | 0.211 | 9542   | neuregulin 2                                                                  |
| GO | plasma membrane                           | 137 | 2763 | 0.211 | 9568   | gamma-aminobutyric acid (GABA) B receptor, 2                                  |
| GO | plasma membrane                           | 137 | 2763 | 0.211 | 9635   | chloride channel accessory 2                                                  |
| GO | GTPase activity                           | 12  | 198  | 0.211 | 10123  | ADP-ribosylation factor-like 4C                                               |
| GO | GTPase activity                           | 12  | 198  | 0.211 | 10672  | guanine nucleotide binding protein (G protein), alpha 13                      |
| GO | GTPase activity                           | 12  | 198  | 0.211 | 121268 | Ras homolog enriched in brain like 1                                          |
| GO | GTPase activity                           | 12  | 198  | 0.211 | 1983   | eukaryotic translation initiation factor 5                                    |
| GO | GTPase activity                           | 12  | 198  | 0.211 | 27289  | Rho family GTPase 1                                                           |
| GO | GTPase activity                           | 12  | 198  | 0.211 | 2774   | guanine nucleotide binding protein (G protein), alpha activating activity pol |
| GO | GTPase activity                           | 12  | 198  | 0.211 | 347733 | tubulin, beta 2B                                                              |
| GO | GTPase activity                           | 12  | 198  | 0.211 | 4893   | neuroblastoma RAS viral (v-ras) oncogene homolog                              |
| GO | GTPase activity                           | 12  | 198  | 0.211 | 51062  | atlastin GTPase 1                                                             |
| GO | GTPase activity                           | 12  | 198  | 0.211 | 55207  | ADP-ribosylation factor-like 8B                                               |
| GO | GTPase activity                           | 12  | 198  | 0.211 | 7846   | tubulin, alpha 1a                                                             |
| GO | GTPase activity                           | 12  | 198  | 0.211 | 79861  | tubulin, alpha-like 3                                                         |
| GO | phenylalanine-tRNA ligase activity        | 1   | 5    | 0.212 | 10056  | phenylalanyl-tRNA synthetase, beta subunit                                    |
| GO | negative regulation of Rho protein signa  | 1   | 5    | 0.212 | 10395  | deleted in liver cancer 1                                                     |
| GO | CRD-mediated mRNA stability complex       | 1   | 5    | 0.212 | 10492  | synaptotagmin binding, cytoplasmic RNA interacting protein                    |
| GO | CRD-mediated mRNA stabilization           | 1   | 5    | 0.212 | 10492  | synaptotagmin binding, cytoplasmic RNA interacting protein                    |
| GO | histone pre-mRNA 3'end processing con     | 1   | 5    | 0.212 | 10492  | synaptotagmin binding, cytoplasmic RNA interacting protein                    |
| GO | dichotomous subdivision of terminal un    | 1   | 5    | 0.212 | 10512  | sema domain, immunoglobulin domain (Ig), short basic domain, secreted, (      |
| GO | outflow tract morphogenesis               | 1   | 5    | 0.212 | 10512  | sema domain, immunoglobulin domain (Ig), short basic domain, secreted, (      |
| GO | negative regulation of cardiac muscle h   | 1   | 5    | 0.212 | 10539  | glutaredoxin 3                                                                |
| GO | type 1 angiotensin receptor binding       | 1   | 5    | 0.212 | 10672  | guanine nucleotide binding protein (G protein), alpha 13                      |
| GO | negative regulation of astrocyte differer | 1   | 5    | 0.212 | 10683  | delta-like 3 (Drosophila)                                                     |
| GO | negative regulation of Notch signaling p  | 1   | 5    | 0.212 | 10683  | delta-like 3 (Drosophila)                                                     |
| GO | epithelial cell-cell adhesion             | 1   | 5    | 0.212 | 11149  | blood vessel epicardial substance                                             |
| GO | positive regulation of receptor recycling | 1   | 5    | 0.212 | 11149  | blood vessel epicardial substance                                             |
| GO | transcription-coupled nucleotide-excisic  | 1   | 5    | 0.212 | 1161   | excision repair cross-complementing rodent repair deficiency, complement      |
| GO | collagen biosynthetic process             | 1   | 5    | 0.212 | 1289   | collagen, type V, alpha 1                                                     |
| GO | positive regulation of triglyceride catab | 1   | 5    | 0.212 | 13     | arylacetylase (esterase)                                                      |
| GO | positive regulation of fibroblast growth  | 1   | 5    | 0.212 | 143282 | fibroblast growth factor binding protein 3                                    |

|    |                                           |   |   |       |        |                                                                        |
|----|-------------------------------------------|---|---|-------|--------|------------------------------------------------------------------------|
| GO | vitamin D metabolic process               | 1 | 5 | 0.212 | 1543   | cytochrome P450, family 1, subfamily A, polypeptide 1                  |
| GO | establishment or maintenance of epithe    | 1 | 5 | 0.212 | 166336 | prickle homolog 2 (Drosophila)                                         |
| GO | DNA catabolic process                     | 1 | 5 | 0.212 | 1775   | deoxyribonuclease I-like 2                                             |
| GO | dynactin complex                          | 1 | 5 | 0.212 | 1781   | dynein, cytoplasmic 1, intermediate chain 2                            |
| GO | sulfate transmembrane transporter acti    | 1 | 5 | 0.212 | 1836   | solute carrier family 26 (sulfate transporter), member 2               |
| GO | peptidyl-lysine modification to hypusine  | 1 | 5 | 0.212 | 1984   | eukaryotic translation initiation factor 5A                            |
| GO | nucleobase, nucleoside, nucleotide kina   | 1 | 5 | 0.212 | 203    | adenylate kinase 1                                                     |
| GO | chemorepellent activity                   | 1 | 5 | 0.212 | 2045   | EPH receptor A7                                                        |
| GO | embryonic camera-type eye developme       | 1 | 5 | 0.212 | 220    | aldehyde dehydrogenase 1 family, member A3                             |
| GO | embryonic eye morphogenesis               | 1 | 5 | 0.212 | 220    | aldehyde dehydrogenase 1 family, member A3                             |
| GO | face development                          | 1 | 5 | 0.212 | 220    | aldehyde dehydrogenase 1 family, member A3                             |
| GO | ribonuclease H activity                   | 1 | 5 | 0.212 | 2237   | flap structure-specific endonuclease 1                                 |
| GO | fibroblast growth factor receptor activit | 1 | 5 | 0.212 | 2264   | fibroblast growth factor receptor 4                                    |
| GO | neuronal action potential propagation     | 1 | 5 | 0.212 | 2281   | FK506 binding protein 1B, 12.6 kDa                                     |
| GO | protein maturation by protein folding     | 1 | 5 | 0.212 | 2281   | FK506 binding protein 1B, 12.6 kDa                                     |
| GO | protein refolding                         | 1 | 5 | 0.212 | 2281   | FK506 binding protein 1B, 12.6 kDa                                     |
| GO | ryanodine-sensitive calcium-release cha   | 1 | 5 | 0.212 | 2281   | FK506 binding protein 1B, 12.6 kDa                                     |
| GO | long-chain fatty acid metabolic process   | 1 | 5 | 0.212 | 23305  | acyl-CoA synthetase long-chain family member 6                         |
| GO | response to gravity                       | 1 | 5 | 0.212 | 23305  | acyl-CoA synthetase long-chain family member 6                         |
| GO | thiamin pyrophosphate binding             | 1 | 5 | 0.212 | 26061  | 2-hydroxyacyl-CoA lyase 1                                              |
| GO | purine base biosynthetic process          | 1 | 5 | 0.212 | 2618   | phosphoribosylglycinamide formyltransferase, phosphoribosylglycinamide |
| GO | phosphatidylinositol transporter activity | 1 | 5 | 0.212 | 26207  | phosphatidylinositol transfer protein, cytoplasmic 1                   |
| GO | dopamine receptor binding                 | 1 | 5 | 0.212 | 27065  | DNA segment on chromosome 4 (unique) 234 expressed sequence            |
| GO | neuron remodeling                         | 1 | 5 | 0.212 | 27289  | Rho family GTPase 1                                                    |
| GO | motile primary cilium                     | 1 | 5 | 0.212 | 2736   | GLI family zinc finger 2                                               |
| GO | spinal cord dorsal/ventral patterning     | 1 | 5 | 0.212 | 2736   | GLI family zinc finger 2                                               |
| GO | regulation of short-term neuronal synap   | 1 | 5 | 0.212 | 2898   | glutamate receptor, ionotropic, kainate 2                              |
| GO | nerve-nerve synaptic transmission         | 1 | 5 | 0.212 | 29767  | tropomodulin 2 (neuronal)                                              |
| GO | neuromuscular process                     | 1 | 5 | 0.212 | 3236   | homeobox D10                                                           |
| GO | cartilage development involved in endo    | 1 | 5 | 0.212 | 3237   | homeobox D11                                                           |
| GO | prostaglandin E receptor activity         | 1 | 5 | 0.212 | 3248   | hydroxyprostaglandin dehydrogenase 15-(NAD)                            |
| GO | negative regulation of lipoprotein lipase | 1 | 5 | 0.212 | 341    | apolipoprotein C-I                                                     |
| GO | negative regulation of receptor-mediate   | 1 | 5 | 0.212 | 341    | apolipoprotein C-I                                                     |
| GO | high-density lipoprotein particle assembl | 1 | 5 | 0.212 | 348    | apolipoprotein E                                                       |
| GO | high-density lipoprotein particle clearan | 1 | 5 | 0.212 | 348    | apolipoprotein E                                                       |
| GO | lipoprotein biosynthetic process          | 1 | 5 | 0.212 | 348    | apolipoprotein E                                                       |

|    |                                            |   |   |       |        |                                                                               |
|----|--------------------------------------------|---|---|-------|--------|-------------------------------------------------------------------------------|
| GO | lipoprotein catabolic process              | 1 | 5 | 0.212 | 348    | apolipoprotein E                                                              |
| GO | positive regulation of cGMP biosynthesi    | 1 | 5 | 0.212 | 348    | apolipoprotein E                                                              |
| GO | tau protein binding                        | 1 | 5 | 0.212 | 348    | apolipoprotein E                                                              |
| GO | magnesium ion transport                    | 1 | 5 | 0.212 | 348938 | NIPA-like domain containing 4                                                 |
| GO | regulation of activin receptor signaling p | 1 | 5 | 0.212 | 3624   | inhibin, beta A                                                               |
| GO | peptide hormone receptor binding           | 1 | 5 | 0.212 | 3952   | leptin                                                                        |
| GO | endoderm formation                         | 1 | 5 | 0.212 | 3975   | LIM homeobox 1                                                                |
| GO | G-protein coupled receptor internalizati   | 1 | 5 | 0.212 | 409    | arrestin, beta 2                                                              |
| GO | melanocortin receptor activity             | 1 | 5 | 0.212 | 4158   | melanocortin 2 receptor (adrenocorticotropic hormone)                         |
| GO | MutSalpha complex binding                  | 1 | 5 | 0.212 | 4292   | mutL homolog 1, colon cancer, nonpolyposis type 2 (E. coli)                   |
| GO | intra-S DNA damage checkpoint              | 1 | 5 | 0.212 | 4436   | mutS homolog 2, colon cancer, nonpolyposis type 1 (E. coli)                   |
| GO | positive regulation of helicase activity   | 1 | 5 | 0.212 | 4436   | mutS homolog 2, colon cancer, nonpolyposis type 1 (E. coli)                   |
| GO | RNA polymerase binding                     | 1 | 5 | 0.212 | 4734   | neural precursor cell expressed, developmentally down-regulated 4             |
| GO | forebrain morphogenesis                    | 1 | 5 | 0.212 | 4763   | neurofibromin 1                                                               |
| GO | myelination in the peripheral nervous sy   | 1 | 5 | 0.212 | 4763   | neurofibromin 1                                                               |
| GO | negative regulation of neuroblast prolif   | 1 | 5 | 0.212 | 4763   | neurofibromin 1                                                               |
| GO | structural constituent of nuclear pore     | 1 | 5 | 0.212 | 4928   | nucleoporin 98kDa                                                             |
| GO | eukaryotic initiation factor 4E binding    | 1 | 5 | 0.212 | 5015   | orthodenticle homeobox 2                                                      |
| GO | gastric acid secretion                     | 1 | 5 | 0.212 | 5021   | oxytocin receptor                                                             |
| GO | positive regulation of uterine smooth m    | 1 | 5 | 0.212 | 5021   | oxytocin receptor                                                             |
| GO | sperm ejaculation                          | 1 | 5 | 0.212 | 5021   | oxytocin receptor                                                             |
| GO | vasopressin receptor activity              | 1 | 5 | 0.212 | 5021   | oxytocin receptor                                                             |
| GO | transepithelial chloride transport         | 1 | 5 | 0.212 | 5031   | pyrimidinergic receptor P2Y, G-protein coupled, 6                             |
| GO | regulation of receptor activity            | 1 | 5 | 0.212 | 5054   | serpin peptidase inhibitor, clade E (nexin, plasminogen activator inhibitor t |
| GO | protein kinase B binding                   | 1 | 5 | 0.212 | 5140   | phosphodiesterase 3B, cGMP-inhibited                                          |
| GO | proton-transporting two-sector ATPase      | 1 | 5 | 0.212 | 528    | ATPase, H+ transporting, lysosomal 42kDa, V1 subunit C1                       |
| GO | mammary gland branching involved in t      | 1 | 5 | 0.212 | 5469   | mediator complex subunit 1                                                    |
| GO | neurotransmitter transporter activity      | 1 | 5 | 0.212 | 55117  | solute carrier family 6 (neutral amino acid transporter), member 15           |
| GO | telomerase holoenzyme complex              | 1 | 5 | 0.212 | 55135  | WD repeat containing, antisense to TP53                                       |
| GO | spindle midzone                            | 1 | 5 | 0.212 | 55207  | ADP-ribosylation factor-like 8B                                               |
| GO | Barr body                                  | 1 | 5 | 0.212 | 55506  | H2A histone family, member Y2                                                 |
| GO | negative regulation of synaptic transmis   | 1 | 5 | 0.212 | 590    | butyrylcholinesterase                                                         |
| GO | mesenchymal to epithelial transition in    | 1 | 5 | 0.212 | 6299   | sal-like 1 (Drosophila)                                                       |
| GO | regulation of binding                      | 1 | 5 | 0.212 | 641    | Bloom syndrome, RecQ helicase-like                                            |
| GO | luteolysis                                 | 1 | 5 | 0.212 | 6586   | slit homolog 3 (Drosophila)                                                   |
| GO | regulation of caspase activity             | 1 | 5 | 0.212 | 6657   | SRY (sex determining region Y)-box 2                                          |



|    |                                                        |   |    |       |                                                                      |
|----|--------------------------------------------------------|---|----|-------|----------------------------------------------------------------------|
| GO | retina morphogenesis in camera-type eye                | 1 | 5  | 0.212 | 6657 SRY (sex determining region Y)-box 2                            |
| GO | pro-B cell differentiation                             | 1 | 5  | 0.212 | 6659 SRY (sex determining region Y)-box 4                            |
| GO | negative regulation of cellular component organization | 1 | 5  | 0.212 | 6672 SP100 nuclear antigen                                           |
| GO | microtubule-severing ATPase activity                   | 1 | 5  | 0.212 | 6683 spastin                                                         |
| GO | cellular response to indole-3-methanol                 | 1 | 5  | 0.212 | 672 breast cancer 1, early onset                                     |
| GO | skeletal muscle thin filament assembly                 | 1 | 5  | 0.212 | 70 actin, alpha, cardiac muscle 1                                    |
| GO | response to cholesterol                                | 1 | 5  | 0.212 | 7046 transforming growth factor, beta receptor 1                     |
| GO | response to prostaglandin E stimulus                   | 1 | 5  | 0.212 | 7046 transforming growth factor, beta receptor 1                     |
| GO | oligopeptide transport                                 | 1 | 5  | 0.212 | 729025 solute carrier family 15, member 5                            |
| GO | positive regulation of protein complex assembly        | 1 | 5  | 0.212 | 7341 SMT3 suppressor of mif two 3 homolog 1 ( <i>S. cerevisiae</i> ) |
| GO | glomerular basement membrane development               | 1 | 5  | 0.212 | 7490 Wilms tumor 1                                                   |
| GO | glomerulus development                                 | 1 | 5  | 0.212 | 7490 Wilms tumor 1                                                   |
| GO | behavioral response to pain                            | 1 | 5  | 0.212 | 773 calcium channel, voltage-dependent, P/Q type, alpha 1A subunit   |
| GO | protein serine/threonine phosphatase inhibition        | 1 | 5  | 0.212 | 81706 protein phosphatase 1, regulatory (inhibitor) subunit 14C      |
| GO | gamma-tubulin complex                                  | 1 | 5  | 0.212 | 8409 ubiquitously-expressed transcript                               |
| GO | mitochondrion transport along microtubule              | 1 | 5  | 0.212 | 8409 ubiquitously-expressed transcript                               |
| GO | transcription termination                              | 1 | 5  | 0.212 | 8458 transcription termination factor, RNA polymerase II             |
| GO | THO complex part of transcription export               | 1 | 5  | 0.212 | 8563 THO complex 5                                                   |
| GO | THO complex                                            | 1 | 5  | 0.212 | 8563 THO complex 5                                                   |
| GO | establishment of planar polarity                       | 1 | 5  | 0.212 | 8626 tumor protein p63                                               |
| GO | multicellular organismal aging                         | 1 | 5  | 0.212 | 8626 tumor protein p63                                               |
| GO | skin morphogenesis                                     | 1 | 5  | 0.212 | 8626 tumor protein p63                                               |
| GO | mitotic cell cycle G2/M transition DNA replication     | 1 | 5  | 0.212 | 890 cyclin A2                                                        |
| GO | AP-type membrane coat adaptor complex                  | 1 | 5  | 0.212 | 8905 adaptor-related protein complex 1, sigma 2 subunit              |
| GO | regulation of cytoskeleton organization                | 1 | 5  | 0.212 | 91624 nexilin (F actin binding protein)                              |
| GO | regulation of smooth muscle cell differentiation       | 1 | 5  | 0.212 | 93649 myocardin                                                      |
| GO | NADPH binding                                          | 1 | 5  | 0.212 | 9540 tumor protein p53 inducible protein 3                           |
| GO | ligand-gated ion channel activity                      | 1 | 5  | 0.212 | 9635 chloride channel accessory 2                                    |
| GO | G2/M transition of mitotic cell cycle                  | 2 | 19 | 0.22  | 1026 cyclin-dependent kinase inhibitor 1A (p21, Cip1)                |
| GO | G2/M transition of mitotic cell cycle                  | 2 | 19 | 0.22  | 332 baculoviral IAP repeat-containing 5                              |
| GO | hyaluronic acid binding                                | 2 | 19 | 0.22  | 145864 hyaluronan and proteoglycan link protein 3                    |
| GO | hyaluronic acid binding                                | 2 | 19 | 0.22  | 26032 sushi domain containing 5                                      |
| GO | nucleotide-excision repair, DNA damage                 | 2 | 19 | 0.22  | 1643 damage-specific DNA binding protein 2, 48kDa                    |
| GO | nucleotide-excision repair, DNA damage                 | 2 | 19 | 0.22  | 2965 general transcription factor IIH, polypeptide 1, 62kDa          |
| GO | base-excision repair                                   | 2 | 19 | 0.22  | 1763 DNA replication helicase 2 homolog (yeast)                      |
| GO | base-excision repair                                   | 2 | 19 | 0.22  | 4968 8-oxoguanine DNA glycosylase                                    |

|    |                                           |   |    |       |        |                                                                               |
|----|-------------------------------------------|---|----|-------|--------|-------------------------------------------------------------------------------|
| GO | GABA-A receptor activity                  | 2 | 19 | 0.22  | 200959 | gamma-aminobutyric acid (GABA) receptor, rho 3                                |
| GO | GABA-A receptor activity                  | 2 | 19 | 0.22  | 2558   | gamma-aminobutyric acid (GABA) A receptor, alpha 5                            |
| GO | extracellular-glutamate-gated ion chanr   | 2 | 19 | 0.22  | 2898   | glutamate receptor, ionotropic, kainate 2                                     |
| GO | extracellular-glutamate-gated ion chanr   | 2 | 19 | 0.22  | 2906   | glutamate receptor, ionotropic, N-methyl D-aspartate 2D                       |
| GO | cofactor binding                          | 2 | 19 | 0.22  | 332    | baculoviral IAP repeat-containing 5                                           |
| GO | cofactor binding                          | 2 | 19 | 0.22  | 7298   | thymidylate synthetase                                                        |
| GO | cholesterol efflux                        | 2 | 19 | 0.22  | 341    | apolipoprotein C-I                                                            |
| GO | cholesterol efflux                        | 2 | 19 | 0.22  | 348    | apolipoprotein E                                                              |
| GO | T cell differentiation                    | 2 | 19 | 0.22  | 3932   | lymphocyte-specific protein tyrosine kinase                                   |
| GO | T cell differentiation                    | 2 | 19 | 0.22  | 6659   | SRY (sex determining region Y)-box 4                                          |
| GO | hydrolase activity, acting on acid anhydi | 2 | 19 | 0.22  | 50485  | SWI/SNF related, matrix associated, actin dependent regulator of chromati     |
| GO | hydrolase activity, acting on acid anhydi | 2 | 19 | 0.22  | 641    | Bloom syndrome, RecQ helicase-like                                            |
| GO | actin cytoskeleton reorganization         | 2 | 19 | 0.22  | 5341   | pleckstrin                                                                    |
| GO | actin cytoskeleton reorganization         | 2 | 19 | 0.22  | 84168  | anthrax toxin receptor 1                                                      |
| GO | vesicle docking involved in exocytosis    | 2 | 19 | 0.22  | 5341   | pleckstrin                                                                    |
| GO | vesicle docking involved in exocytosis    | 2 | 19 | 0.22  | 54843  | synaptotagmin-like 2                                                          |
| GO | chromatin organization                    | 2 | 19 | 0.22  | 6657   | SRY (sex determining region Y)-box 2                                          |
| GO | chromatin organization                    | 2 | 19 | 0.22  | 8091   | high mobility group AT-hook 2                                                 |
| GO | negative regulation of adenylate cyclase  | 2 | 19 | 0.22  | 729230 | chemokine (C-C motif) receptor 2                                              |
| GO | negative regulation of adenylate cyclase  | 2 | 19 | 0.22  | 9568   | gamma-aminobutyric acid (GABA) B receptor, 2                                  |
| GO | extracellular matrix                      | 3 | 35 | 0.221 | 1289   | collagen, type V, alpha 1                                                     |
| GO | extracellular matrix                      | 3 | 35 | 0.221 | 1290   | collagen, type V, alpha 2                                                     |
| GO | extracellular matrix                      | 3 | 35 | 0.221 | 5054   | serpin peptidase inhibitor, clade E (nexin, plasminogen activator inhibitor t |
| GO | nucleosome                                | 4 | 52 | 0.221 | 55506  | H2A histone family, member Y2                                                 |
| GO | nucleosome                                | 4 | 52 | 0.221 | 8348   | histone cluster 1, H2bo                                                       |
| GO | nucleosome                                | 4 | 52 | 0.221 | 8349   | histone cluster 2, H2be                                                       |
| GO | nucleosome                                | 4 | 52 | 0.221 | 8970   | histone cluster 1, H2bj                                                       |
| GO | cell-cell adhesion                        | 5 | 70 | 0.225 | 1008   | cadherin 10, type 2 (T2-cadherin)                                             |
| GO | cell-cell adhesion                        | 5 | 70 | 0.225 | 1496   | catenin (cadherin-associated protein), alpha 2                                |
| GO | cell-cell adhesion                        | 5 | 70 | 0.225 | 26999  | cytoplasmic FMR1 interacting protein 2                                        |
| GO | cell-cell adhesion                        | 5 | 70 | 0.225 | 4867   | nephronophthisis 1 (juvenile)                                                 |
| GO | cell-cell adhesion                        | 5 | 70 | 0.225 | 4897   | neuronal cell adhesion molecule                                               |
| GO | response to ethanol                       | 5 | 70 | 0.225 | 2534   | FYN oncogene related to SRC, FGR, YES                                         |
| GO | response to ethanol                       | 5 | 70 | 0.225 | 348    | apolipoprotein E                                                              |
| GO | response to ethanol                       | 5 | 70 | 0.225 | 6347   | chemokine (C-C motif) ligand 2                                                |
| GO | response to ethanol                       | 5 | 70 | 0.225 | 70     | actin, alpha, cardiac muscle 1                                                |

|    |                                    |    |     |       |                                                                                    |
|----|------------------------------------|----|-----|-------|------------------------------------------------------------------------------------|
| GO | response to ethanol                | 5  | 70  | 0.225 | 898 cyclin E1                                                                      |
| GO | intracellular signaling pathway    | 11 | 182 | 0.226 | 25780 RAS guanyl releasing protein 3 (calcium and DAG-regulated)                   |
| GO | intracellular signaling pathway    | 11 | 182 | 0.226 | 26499 pleckstrin 2                                                                 |
| GO | intracellular signaling pathway    | 11 | 182 | 0.226 | 51676 ankyrin repeat and SOCS box-containing 2                                     |
| GO | intracellular signaling pathway    | 11 | 182 | 0.226 | 5341 pleckstrin                                                                    |
| GO | intracellular signaling pathway    | 11 | 182 | 0.226 | 54210 triggering receptor expressed on myeloid cells 1                             |
| GO | intracellular signaling pathway    | 11 | 182 | 0.226 | 55789 DEP domain containing 1B                                                     |
| GO | intracellular signaling pathway    | 11 | 182 | 0.226 | 5588 protein kinase C, theta                                                       |
| GO | intracellular signaling pathway    | 11 | 182 | 0.226 | 7857 secretogranin II (chromogranin C)                                             |
| GO | intracellular signaling pathway    | 11 | 182 | 0.226 | 8835 suppressor of cytokine signaling 2                                            |
| GO | intracellular signaling pathway    | 11 | 182 | 0.226 | 8997 kalirin, RhoGEF kinase                                                        |
| GO | intracellular signaling pathway    | 11 | 182 | 0.226 | 9744 ArfGAP with coiled-coil, ankyrin repeat and PH domains 1                      |
| GO | serine-type endopeptidase activity | 9  | 144 | 0.227 | 132724 transmembrane protease, serine 11B                                          |
| GO | serine-type endopeptidase activity | 9  | 144 | 0.227 | 162494 rhomboid, veinlet-like 3 (Drosophila)                                       |
| GO | serine-type endopeptidase activity | 9  | 144 | 0.227 | 27429 HtrA serine peptidase 2                                                      |
| GO | serine-type endopeptidase activity | 9  | 144 | 0.227 | 344805 transmembrane protease, serine 7                                            |
| GO | serine-type endopeptidase activity | 9  | 144 | 0.227 | 5054 serpin peptidase inhibitor, clade E (nexin, plasminogen activator inhibitor t |
| GO | serine-type endopeptidase activity | 9  | 144 | 0.227 | 5125 proprotein convertase subtilisin/kexin type 5                                 |
| GO | serine-type endopeptidase activity | 9  | 144 | 0.227 | 5624 protein C (inactivator of coagulation factors Va and VIIIa)                   |
| GO | serine-type endopeptidase activity | 9  | 144 | 0.227 | 5654 HtrA serine peptidase 1                                                       |
| GO | serine-type endopeptidase activity | 9  | 144 | 0.227 | 7113 transmembrane protease, serine 2                                              |
| GO | helicase activity                  | 7  | 107 | 0.229 | 10212 DEAD (Asp-Glu-Ala-Asp) box polypeptide 39                                    |
| GO | helicase activity                  | 7  | 107 | 0.229 | 11056 DEAD (Asp-Glu-Ala-Asp) box polypeptide 52                                    |
| GO | helicase activity                  | 7  | 107 | 0.229 | 1763 DNA replication helicase 2 homolog (yeast)                                    |
| GO | helicase activity                  | 7  | 107 | 0.229 | 641 Bloom syndrome, RecQ helicase-like                                             |
| GO | helicase activity                  | 7  | 107 | 0.229 | 84083 zinc finger, RAN-binding domain containing 3                                 |
| GO | helicase activity                  | 7  | 107 | 0.229 | 8458 transcription termination factor, RNA polymerase II                           |
| GO | helicase activity                  | 7  | 107 | 0.229 | 89797 neuron navigator 2                                                           |
| GO | double-strand break repair         | 3  | 36  | 0.233 | 2237 flap structure-specific endonuclease 1                                        |
| GO | double-strand break repair         | 3  | 36  | 0.233 | 4436 mutS homolog 2, colon cancer, nonpolyposis type 1 (E. coli)                   |
| GO | double-strand break repair         | 3  | 36  | 0.233 | 672 breast cancer 1, early onset                                                   |
| GO | response to organic substance      | 3  | 36  | 0.233 | 2618 phosphoribosylglycinamide formyltransferase, phosphoribosylglycinamide        |
| GO | response to organic substance      | 3  | 36  | 0.233 | 2628 glycine amidinotransferase (L-arginine:glycine amidinotransferase)            |
| GO | response to organic substance      | 3  | 36  | 0.233 | 7037 transferrin receptor (p90, CD71)                                              |
| GO | skeletal muscle tissue development | 3  | 36  | 0.233 | 3236 homeobox D10                                                                  |
| GO | skeletal muscle tissue development | 3  | 36  | 0.233 | 4637 myosin, light chain 6, alkali, smooth muscle and non-muscle                   |

|    |                                          |    |     |       |        |                                                                              |
|----|------------------------------------------|----|-----|-------|--------|------------------------------------------------------------------------------|
| GO | skeletal muscle tissue development       | 3  | 36  | 0.233 | 5081   | paired box 7                                                                 |
| GO | lamellipodium                            | 5  | 71  | 0.234 | 1000   | cadherin 2, type 1, N-cadherin (neuronal)                                    |
| GO | lamellipodium                            | 5  | 71  | 0.234 | 10096  | ARP3 actin-related protein 3 homolog (yeast)                                 |
| GO | lamellipodium                            | 5  | 71  | 0.234 | 1496   | catenin (cadherin-associated protein), alpha 2                               |
| GO | lamellipodium                            | 5  | 71  | 0.234 | 26230  | T-cell lymphoma invasion and metastasis 2                                    |
| GO | lamellipodium                            | 5  | 71  | 0.234 | 5420   | podocalyxin-like                                                             |
| GO | regulation of Rho protein signal transdu | 5  | 71  | 0.234 | 1000   | cadherin 2, type 1, N-cadherin (neuronal)                                    |
| GO | regulation of Rho protein signal transdu | 5  | 71  | 0.234 | 153478 | pleckstrin homology domain containing, family G (with RhoGef domain) me      |
| GO | regulation of Rho protein signal transdu | 5  | 71  | 0.234 | 26230  | T-cell lymphoma invasion and metastasis 2                                    |
| GO | regulation of Rho protein signal transdu | 5  | 71  | 0.234 | 5924   | Ras protein-specific guanine nucleotide-releasing factor 2                   |
| GO | regulation of Rho protein signal transdu | 5  | 71  | 0.234 | 8997   | kalirin, RhoGEF kinase                                                       |
| GO | transmembrane receptor protein tyrosii   | 5  | 71  | 0.234 | 2045   | EPH receptor A7                                                              |
| GO | transmembrane receptor protein tyrosii   | 5  | 71  | 0.234 | 2321   | fms-related tyrosine kinase 1 (vascular endothelial growth factor/vascular p |
| GO | transmembrane receptor protein tyrosii   | 5  | 71  | 0.234 | 558    | AXL receptor tyrosine kinase                                                 |
| GO | transmembrane receptor protein tyrosii   | 5  | 71  | 0.234 | 5795   | protein tyrosine phosphatase, receptor type, J                               |
| GO | transmembrane receptor protein tyrosii   | 5  | 71  | 0.234 | 7010   | TEK tyrosine kinase, endothelial                                             |
| GO | spermatogenesis                          | 15 | 261 | 0.234 | 10656  | KH domain containing, RNA binding, signal transduction associated 3          |
| GO | spermatogenesis                          | 15 | 261 | 0.234 | 11077  | heat shock transcription factor 2 binding protein                            |
| GO | spermatogenesis                          | 15 | 261 | 0.234 | 132671 | spermatogenesis associated 18 homolog (rat)                                  |
| GO | spermatogenesis                          | 15 | 261 | 0.234 | 132851 | spermatogenesis associated 4                                                 |
| GO | spermatogenesis                          | 15 | 261 | 0.234 | 1788   | DNA (cytosine-5-)-methyltransferase 3 alpha                                  |
| GO | spermatogenesis                          | 15 | 261 | 0.234 | 23705  | cell adhesion molecule 1                                                     |
| GO | spermatogenesis                          | 15 | 261 | 0.234 | 4292   | mutL homolog 1, colon cancer, nonpolyposis type 2 (E. coli)                  |
| GO | spermatogenesis                          | 15 | 261 | 0.234 | 4436   | mutS homolog 2, colon cancer, nonpolyposis type 1 (E. coli)                  |
| GO | spermatogenesis                          | 15 | 261 | 0.234 | 53340  | sperm autoantigenic protein 17                                               |
| GO | spermatogenesis                          | 15 | 261 | 0.234 | 54993  | zinc finger and SCAN domain containing 2                                     |
| GO | spermatogenesis                          | 15 | 261 | 0.234 | 56852  | RAD18 homolog (S. cerevisiae)                                                |
| GO | spermatogenesis                          | 15 | 261 | 0.234 | 5889   | RAD51 homolog C (S. cerevisiae)                                              |
| GO | spermatogenesis                          | 15 | 261 | 0.234 | 60675  | prokineticin 2                                                               |
| GO | spermatogenesis                          | 15 | 261 | 0.234 | 6662   | SRY (sex determining region Y)-box 9                                         |
| GO | spermatogenesis                          | 15 | 261 | 0.234 | 8626   | tumor protein p63                                                            |
| GO | connexon complex                         | 2  | 20  | 0.237 | 10052  | gap junction protein, gamma 1, 45kDa                                         |
| GO | connexon complex                         | 2  | 20  | 0.237 | 127534 | gap junction protein, beta 4, 30.3kDa                                        |
| GO | neural crest cell migration              | 2  | 20  | 0.237 | 10512  | sema domain, immunoglobulin domain (Ig), short basic domain, secreted, (     |
| GO | neural crest cell migration              | 2  | 20  | 0.237 | 9839   | zinc finger E-box binding homeobox 2                                         |
| GO | hippocampus development                  | 2  | 20  | 0.237 | 1746   | distal-less homeobox 2                                                       |

|    |                                             |   |     |       |                                                                                  |
|----|---------------------------------------------|---|-----|-------|----------------------------------------------------------------------------------|
| GO | hippocampus development                     | 2 | 20  | 0.237 | 9839 zinc finger E-box binding homeobox 2                                        |
| GO | response to amphetamine                     | 2 | 20  | 0.237 | 1787 tRNA aspartic acid methyltransferase 1                                      |
| GO | response to amphetamine                     | 2 | 20  | 0.237 | 5021 oxytocin receptor                                                           |
| GO | L-ascorbic acid binding                     | 2 | 20  | 0.237 | 283208 prolyl 4-hydroxylase, alpha polypeptide III                               |
| GO | L-ascorbic acid binding                     | 2 | 20  | 0.237 | 5264 phytanoyl-CoA 2-hydroxylase                                                 |
| GO | positive regulation of protein kinase B s   | 2 | 20  | 0.237 | 7010 TEK tyrosine kinase, endothelial                                            |
| GO | positive regulation of protein kinase B s   | 2 | 20  | 0.237 | 7046 transforming growth factor, beta receptor 1                                 |
| GO | protein C-terminus binding                  | 9 | 146 | 0.238 | 10055 SUMO1 activating enzyme subunit 1                                          |
| GO | protein C-terminus binding                  | 9 | 146 | 0.238 | 10612 tripartite motif-containing 3                                              |
| GO | protein C-terminus binding                  | 9 | 146 | 0.238 | 23705 cell adhesion molecule 1                                                   |
| GO | protein C-terminus binding                  | 9 | 146 | 0.238 | 3932 lymphocyte-specific protein tyrosine kinase                                 |
| GO | protein C-terminus binding                  | 9 | 146 | 0.238 | 4436 mutS homolog 2, colon cancer, nonpolyposis type 1 (E. coli)                 |
| GO | protein C-terminus binding                  | 9 | 146 | 0.238 | 5494 protein phosphatase, Mg2+/Mn2+ dependent, 1A                                |
| GO | protein C-terminus binding                  | 9 | 146 | 0.238 | 55137 fidgetin                                                                   |
| GO | protein C-terminus binding                  | 9 | 146 | 0.238 | 667 dystonin                                                                     |
| GO | protein C-terminus binding                  | 9 | 146 | 0.238 | 8777 multiple PDZ domain protein                                                 |
| GO | proton transport                            | 4 | 54  | 0.241 | 479 ATPase, H+/K+ transporting, nongastric, alpha polypeptide                    |
| GO | proton transport                            | 4 | 54  | 0.241 | 51382 ATPase, H+ transporting, lysosomal 34kDa, V1 subunit D                     |
| GO | proton transport                            | 4 | 54  | 0.241 | 516 ATP synthase, H+ transporting, mitochondrial F0 complex, subunit C1 (subu    |
| GO | proton transport                            | 4 | 54  | 0.241 | 528 ATPase, H+ transporting, lysosomal 42kDa, V1 subunit C1                      |
| GO | tight junction                              | 5 | 72  | 0.242 | 11149 blood vessel epicardial substance                                          |
| GO | tight junction                              | 5 | 72  | 0.242 | 23562 claudin 14                                                                 |
| GO | tight junction                              | 5 | 72  | 0.242 | 84552 par-6 partitioning defective 6 homolog gamma (C. elegans)                  |
| GO | tight junction                              | 5 | 72  | 0.242 | 8777 multiple PDZ domain protein                                                 |
| GO | tight junction                              | 5 | 72  | 0.242 | 9076 claudin 1                                                                   |
| GO | cartilage development                       | 3 | 37  | 0.246 | 1746 distal-less homeobox 2                                                      |
| GO | cartilage development                       | 3 | 37  | 0.246 | 25884 chordin-like 2                                                             |
| GO | cartilage development                       | 3 | 37  | 0.246 | 5081 paired box 7                                                                |
| GO | NAD or NADH binding                         | 3 | 37  | 0.246 | 23171 glycerol-3-phosphate dehydrogenase 1-like                                  |
| GO | NAD or NADH binding                         | 3 | 37  | 0.246 | 3028 hydroxysteroid (17-beta) dehydrogenase 10                                   |
| GO | NAD or NADH binding                         | 3 | 37  | 0.246 | 3248 hydroxyprostaglandin dehydrogenase 15-(NAD)                                 |
| GO | podosome                                    | 1 | 6   | 0.248 | 10096 ARP3 actin-related protein 3 homolog (yeast)                               |
| GO | pre-snoRNP complex                          | 1 | 6   | 0.248 | 10528 NOP56 ribonucleoprotein homolog (yeast)                                    |
| GO | paraxial mesoderm development               | 1 | 6   | 0.248 | 10683 delta-like 3 (Drosophila)                                                  |
| GO | activation of transmembrane receptor $\rho$ | 1 | 6   | 0.248 | 1136 cholinergic receptor, nicotinic, alpha 3                                    |
| GO | maintenance of gastrointestinal epitheli    | 1 | 6   | 0.248 | 12 serpin peptidase inhibitor, clade A (alpha-1 antiproteinase, antitrypsin), me |

|    |                                                            |   |   |       |        |                                                             |
|----|------------------------------------------------------------|---|---|-------|--------|-------------------------------------------------------------|
| GO | poly(U) RNA binding                                        | 1 | 6 | 0.248 | 124540 | musashi homolog 2 (Drosophila)                              |
| GO | assembly of spliceosomal tri-snRNP                         | 1 | 6 | 0.248 | 135295 | splicing factor, arginine/serine-rich 13B                   |
| GO | RS domain binding                                          | 1 | 6 | 0.248 | 135295 | splicing factor, arginine/serine-rich 13B                   |
| GO | protein neddylation                                        | 1 | 6 | 0.248 | 140739 | ubiquitin-conjugating enzyme E2F (putative)                 |
| GO | fucose metabolic process                                   | 1 | 6 | 0.248 | 145173 | beta 1,3-galactosyltransferase-like                         |
| GO | amine metabolic process                                    | 1 | 6 | 0.248 | 1543   | cytochrome P450, family 1, subfamily A, polypeptide 1       |
| GO | mitochondrial DNA replication                              | 1 | 6 | 0.248 | 1763   | DNA replication helicase 2 homolog (yeast)                  |
| GO | S-adenosylhomocysteine metabolic process                   | 1 | 6 | 0.248 | 1788   | DNA (cytosine-5-)-methyltransferase 3 alpha                 |
| GO | endothelial cell differentiation                           | 1 | 6 | 0.248 | 182    | jagged 1 (Alagille syndrome)                                |
| GO | aldehyde dehydrogenase [NAD(P)+] activity                  | 1 | 6 | 0.248 | 220    | aldehyde dehydrogenase 1 family, member A3                  |
| GO | retinoic acid metabolic process                            | 1 | 6 | 0.248 | 220    | aldehyde dehydrogenase 1 family, member A3                  |
| GO | 5'-3' exonuclease activity                                 | 1 | 6 | 0.248 | 2237   | flap structure-specific endonuclease 1                      |
| GO | regulation of ryanodine-sensitive calcium release          | 1 | 6 | 0.248 | 2281   | FK506 binding protein 1B, 12.6 kDa                          |
| GO | response to redox state                                    | 1 | 6 | 0.248 | 2281   | FK506 binding protein 1B, 12.6 kDa                          |
| GO | regulation of Ras protein signal transduction              | 1 | 6 | 0.248 | 2305   | forkhead box M1                                             |
| GO | juxtaparanode region of axon                               | 1 | 6 | 0.248 | 23136  | erythrocyte membrane protein band 4.1-like 3                |
| GO | aminomethyltransferase activity                            | 1 | 6 | 0.248 | 2653   | glycine cleavage system protein H (aminomethyl carrier)     |
| GO | lipoic acid binding                                        | 1 | 6 | 0.248 | 2653   | glycine cleavage system protein H (aminomethyl carrier)     |
| GO | glutathione binding                                        | 1 | 6 | 0.248 | 2878   | glutathione peroxidase 3 (plasma)                           |
| GO | negative regulation of synaptic transmission               | 1 | 6 | 0.248 | 2898   | glutamate receptor, ionotropic, kainate 2                   |
| GO | regulation of inhibitory postsynaptic membrane potential   | 1 | 6 | 0.248 | 2898   | glutamate receptor, ionotropic, kainate 2                   |
| GO | N-methyl-D-aspartate selective glutamate receptor activity | 1 | 6 | 0.248 | 2906   | glutamate receptor, ionotropic, N-methyl D-aspartate 2D     |
| GO | startle response                                           | 1 | 6 | 0.248 | 2906   | glutamate receptor, ionotropic, N-methyl D-aspartate 2D     |
| GO | glucocorticoid receptor binding                            | 1 | 6 | 0.248 | 29893  | PSMC3 interacting protein                                   |
| GO | Leydig cell differentiation                                | 1 | 6 | 0.248 | 3028   | hydroxysteroid (17-beta) dehydrogenase 10                   |
| GO | forelimb morphogenesis                                     | 1 | 6 | 0.248 | 3236   | homeobox D10                                                |
| GO | hindlimb morphogenesis                                     | 1 | 6 | 0.248 | 3236   | homeobox D10                                                |
| GO | parturition                                                | 1 | 6 | 0.248 | 3248   | hydroxyprostaglandin dehydrogenase 15-(NAD)                 |
| GO | very-low-density lipoprotein particle assembly             | 1 | 6 | 0.248 | 341    | apolipoprotein C-I                                          |
| GO | extrinsic to external side of plasma membrane              | 1 | 6 | 0.248 | 348    | apolipoprotein E                                            |
| GO | negative regulation of platelet activation                 | 1 | 6 | 0.248 | 348    | apolipoprotein E                                            |
| GO | very-low-density lipoprotein particle reassembly           | 1 | 6 | 0.248 | 348    | apolipoprotein E                                            |
| GO | interleukin-1 receptor antagonist activity                 | 1 | 6 | 0.248 | 3557   | interleukin 1 receptor antagonist                           |
| GO | pre-microRNA processing                                    | 1 | 6 | 0.248 | 389421 | lin-28 homolog B (C. elegans)                               |
| GO | regulation of steroid biosynthetic process                 | 1 | 6 | 0.248 | 3952   | leptin                                                      |
| GO | centromeric DNA binding                                    | 1 | 6 | 0.248 | 4436   | mutS homolog 2, colon cancer, nonpolyposis type 1 (E. coli) |

|    |                                           |   |   |       |                                                                                           |
|----|-------------------------------------------|---|---|-------|-------------------------------------------------------------------------------------------|
| GO | MutLalpha complex binding                 | 1 | 6 | 0.248 | 4436 mutS homolog 2, colon cancer, nonpolyposis type 1 (E. coli)                          |
| GO | cellular response to UV                   | 1 | 6 | 0.248 | 4734 neural precursor cell expressed, developmentally down-regulated 4                    |
| GO | glucocorticoid receptor signaling pathw   | 1 | 6 | 0.248 | 4734 neural precursor cell expressed, developmentally down-regulated 4                    |
| GO | regulation of synaptic transmission, GAT  | 1 | 6 | 0.248 | 4893 neuroblastoma RAS viral (v-ras) oncogene homolog                                     |
| GO | striated muscle cell differentiation      | 1 | 6 | 0.248 | 4893 neuroblastoma RAS viral (v-ras) oncogene homolog                                     |
| GO | positive regulation of synaptic transmis  | 1 | 6 | 0.248 | 5021 oxytocin receptor                                                                    |
| GO | positive regulation of synaptogenesis     | 1 | 6 | 0.248 | 5021 oxytocin receptor                                                                    |
| GO | DNA damage response, signal transduct     | 1 | 6 | 0.248 | 51499 TP53 regulated inhibitor of apoptosis 1                                             |
| GO | proton-transporting ATP synthase comp     | 1 | 6 | 0.248 | 516 ATP synthase, H <sup>+</sup> transporting, mitochondrial F0 complex, subunit C1 (subu |
| GO | negative regulation of G-protein couple   | 1 | 6 | 0.248 | 5341 pleckstrin                                                                           |
| GO | histone mRNA 3'-end processing            | 1 | 6 | 0.248 | 53981 cleavage and polyadenylation specific factor 2, 100kDa                              |
| GO | exocytic vesicle                          | 1 | 6 | 0.248 | 54843 synaptotagmin-like 2                                                                |
| GO | neurexin binding                          | 1 | 6 | 0.248 | 54843 synaptotagmin-like 2                                                                |
| GO | drug transmembrane transporter activit    | 1 | 6 | 0.248 | 55244 solute carrier family 47, member 1                                                  |
| GO | alpha DNA polymerase:primase comple       | 1 | 6 | 0.248 | 5558 primase, DNA, polypeptide 2 (58kDa)                                                  |
| GO | phospholipid homeostasis                  | 1 | 6 | 0.248 | 57678 glycerol-3-phosphate acyltransferase, mitochondrial                                 |
| GO | response to fructose stimulus             | 1 | 6 | 0.248 | 57678 glycerol-3-phosphate acyltransferase, mitochondrial                                 |
| GO | apical cortex                             | 1 | 6 | 0.248 | 57817 hepcidin antimicrobial peptide                                                      |
| GO | negative regulation of survival gene pro  | 1 | 6 | 0.248 | 581 BCL2-associated X protein                                                             |
| GO | nuclear envelope lumen                    | 1 | 6 | 0.248 | 590 butyrylcholinesterase                                                                 |
| GO | vitamin A metabolic process               | 1 | 6 | 0.248 | 5947 retinol binding protein 1, cellular                                                  |
| GO | transition metal ion binding              | 1 | 6 | 0.248 | 6241 ribonucleotide reductase M2                                                          |
| GO | lymphocyte chemotaxis                     | 1 | 6 | 0.248 | 6347 chemokine (C-C motif) ligand 2                                                       |
| GO | prostate epithelial cord arborization inv | 1 | 6 | 0.248 | 6422 secreted frizzled-related protein 1                                                  |
| GO | regulation of branching involved in pros  | 1 | 6 | 0.248 | 6422 secreted frizzled-related protein 1                                                  |
| GO | protein insertion into membrane           | 1 | 6 | 0.248 | 65055 receptor accessory protein 1                                                        |
| GO | positive regulation of BMP signaling pat  | 1 | 6 | 0.248 | 659 bone morphogenetic protein receptor, type II (serine/threonine kinase)                |
| GO | tongue development                        | 1 | 6 | 0.248 | 6657 SRY (sex determining region Y)-box 2                                                 |
| GO | exocrine pancreas development             | 1 | 6 | 0.248 | 6659 SRY (sex determining region Y)-box 4                                                 |
| GO | chromo shadow domain binding              | 1 | 6 | 0.248 | 6672 SP100 nuclear antigen                                                                |
| GO | erythrocyte development                   | 1 | 6 | 0.248 | 669 2,3-bisphosphoglycerate mutase                                                        |
| GO | SMAD protein nuclear translocation        | 1 | 6 | 0.248 | 6711 spectrin, beta, non-erythrocytic 1                                                   |
| GO | gamma-tubulin ring complex                | 1 | 6 | 0.248 | 672 breast cancer 1, early onset                                                          |
| GO | G-protein coupled photoreceptor activit   | 1 | 6 | 0.248 | 6785 elongation of very long chain fatty acids (FEN1/Elo2, SUR4/Elo3, yeast)-like         |
| GO | cardiac muscle tissue morphogenesis       | 1 | 6 | 0.248 | 70 actin, alpha, cardiac muscle 1                                                         |
| GO | response to manganese ion                 | 1 | 6 | 0.248 | 7037 transferrin receptor (p90, CD71)                                                     |

|    |                                         |    |     |       |                                                                                    |
|----|-----------------------------------------|----|-----|-------|------------------------------------------------------------------------------------|
| GO | cell motility                           | 1  | 6   | 0.248 | 7046 transforming growth factor, beta receptor 1                                   |
| GO | germ cell migration                     | 1  | 6   | 0.248 | 7046 transforming growth factor, beta receptor 1                                   |
| GO | store-operated calcium channel activity | 1  | 6   | 0.248 | 7220 transient receptor potential cation channel, subfamily C, member 1            |
| GO | sex determination                       | 1  | 6   | 0.248 | 7490 Wilms tumor 1                                                                 |
| GO | spinal cord motor neuron differentiatio | 1  | 6   | 0.248 | 773 calcium channel, voltage-dependent, P/Q type, alpha 1A subunit                 |
| GO | DNA packaging                           | 1  | 6   | 0.248 | 8520 histone acetyltransferase 1                                                   |
| GO | epithelial cell development             | 1  | 6   | 0.248 | 8626 tumor protein p63                                                             |
| GO | prostate gland development              | 1  | 6   | 0.248 | 8626 tumor protein p63                                                             |
| GO | proline biosynthetic process            | 1  | 6   | 0.248 | 8659 aldehyde dehydrogenase 4 family, member A1                                    |
| GO | response to glucagon stimulus           | 1  | 6   | 0.248 | 890 cyclin A2                                                                      |
| GO | glycoprotein biosynthetic process       | 1  | 6   | 0.248 | 9215 like-glycosyltransferase                                                      |
| GO | Notch receptor processing               | 1  | 6   | 0.248 | 92737 delta/notch-like EGF repeat containing                                       |
| GO | bicarbonate transport                   | 1  | 6   | 0.248 | 9497 solute carrier family 4, sodium bicarbonate cotransporter, member 7           |
| GO | response to toxin                       | 4  | 55  | 0.252 | 10202 dehydrogenase/reductase (SDR family) member 2                                |
| GO | response to toxin                       | 4  | 55  | 0.252 | 1026 cyclin-dependent kinase inhibitor 1A (p21, Cip1)                              |
| GO | response to toxin                       | 4  | 55  | 0.252 | 581 BCL2-associated X protein                                                      |
| GO | response to toxin                       | 4  | 55  | 0.252 | 7046 transforming growth factor, beta receptor 1                                   |
| GO | post-embryonic development              | 4  | 55  | 0.252 | 10512 sema domain, immunoglobulin domain (Ig), short basic domain, secreted, (     |
| GO | post-embryonic development              | 4  | 55  | 0.252 | 3975 LIM homeobox 1                                                                |
| GO | post-embryonic development              | 4  | 55  | 0.252 | 7046 transforming growth factor, beta receptor 1                                   |
| GO | post-embryonic development              | 4  | 55  | 0.252 | 8788 delta-like 1 homolog (Drosophila)                                             |
| GO | ossification                            | 4  | 55  | 0.252 | 1290 collagen, type V, alpha 2                                                     |
| GO | ossification                            | 4  | 55  | 0.252 | 1836 solute carrier family 26 (sulfate transporter), member 2                      |
| GO | ossification                            | 4  | 55  | 0.252 | 25884 chordin-like 2                                                               |
| GO | ossification                            | 4  | 55  | 0.252 | 9260 PDZ and LIM domain 7 (enigma)                                                 |
| GO | transforming growth factor beta recepti | 4  | 55  | 0.252 | 3248 hydroxyprostaglandin dehydrogenase 15-(NAD)                                   |
| GO | transforming growth factor beta recepti | 4  | 55  | 0.252 | 409 arrestin, beta 2                                                               |
| GO | transforming growth factor beta recepti | 4  | 55  | 0.252 | 6347 chemokine (C-C motif) ligand 2                                                |
| GO | transforming growth factor beta recepti | 4  | 55  | 0.252 | 7046 transforming growth factor, beta receptor 1                                   |
| GO | signal transducer activity              | 16 | 285 | 0.252 | 10672 guanine nucleotide binding protein (G protein), alpha 13                     |
| GO | signal transducer activity              | 16 | 285 | 0.252 | 25780 RAS guanyl releasing protein 3 (calcium and DAG-regulated)                   |
| GO | signal transducer activity              | 16 | 285 | 0.252 | 2774 guanine nucleotide binding protein (G protein), alpha activating activity pol |
| GO | signal transducer activity              | 16 | 285 | 0.252 | 2786 guanine nucleotide binding protein (G protein), gamma 4                       |
| GO | signal transducer activity              | 16 | 285 | 0.252 | 355 Fas (TNF receptor superfamily, member 6)                                       |
| GO | signal transducer activity              | 16 | 285 | 0.252 | 3624 inhibin, beta A                                                               |
| GO | signal transducer activity              | 16 | 285 | 0.252 | 406 aryl hydrocarbon receptor nuclear translocator-like                            |



|    |                                            |    |     |       |        |                                                                         |
|----|--------------------------------------------|----|-----|-------|--------|-------------------------------------------------------------------------|
| GO | signal transducer activity                 | 16 | 285 | 0.252 | 54331  | guanine nucleotide binding protein (G protein), gamma 2                 |
| GO | signal transducer activity                 | 16 | 285 | 0.252 | 5494   | protein phosphatase, Mg2+/Mn2+ dependent, 1A                            |
| GO | signal transducer activity                 | 16 | 285 | 0.252 | 59345  | guanine nucleotide binding protein (G protein), beta polypeptide 4      |
| GO | signal transducer activity                 | 16 | 285 | 0.252 | 6000   | regulator of G-protein signaling 7                                      |
| GO | signal transducer activity                 | 16 | 285 | 0.252 | 6347   | chemokine (C-C motif) ligand 2                                          |
| GO | signal transducer activity                 | 16 | 285 | 0.252 | 7481   | wingless-type MMTV integration site family, member 11                   |
| GO | signal transducer activity                 | 16 | 285 | 0.252 | 81029  | wingless-type MMTV integration site family, member 5B                   |
| GO | signal transducer activity                 | 16 | 285 | 0.252 | 84668  | family with sequence similarity 126, member A                           |
| GO | signal transducer activity                 | 16 | 285 | 0.252 | 8490   | regulator of G-protein signaling 5                                      |
| GO | calcium-dependent phospholipid bindin      | 2  | 21  | 0.255 | 27445  | piccolo (presynaptic cytomatrix protein)                                |
| GO | calcium-dependent phospholipid bindin      | 2  | 21  | 0.255 | 309    | annexin A6                                                              |
| GO | ventricular cardiac muscle tissue morph    | 2  | 21  | 0.255 | 7137   | troponin I type 3 (cardiac)                                             |
| GO | ventricular cardiac muscle tissue morph    | 2  | 21  | 0.255 | 7168   | tropomyosin 1 (alpha)                                                   |
| GO | Wnt receptor signaling pathway, calciur    | 2  | 21  | 0.255 | 7481   | wingless-type MMTV integration site family, member 11                   |
| GO | Wnt receptor signaling pathway, calciur    | 2  | 21  | 0.255 | 81029  | wingless-type MMTV integration site family, member 5B                   |
| GO | transferase activity, transferring glycosy | 9  | 149 | 0.257 | 11226  | UDP-N-acetyl-alpha-D-galactosamine:polypeptide N-acetylgalactosaminyltr |
| GO | transferase activity, transferring glycosy | 9  | 149 | 0.257 | 11227  | UDP-N-acetyl-alpha-D-galactosamine:polypeptide N-acetylgalactosaminyltr |
| GO | transferase activity, transferring glycosy | 9  | 149 | 0.257 | 114805 | UDP-N-acetyl-alpha-D-galactosamine:polypeptide N-acetylgalactosaminyltr |
| GO | transferase activity, transferring glycosy | 9  | 149 | 0.257 | 145173 | beta 1,3-galactosyltransferase-like                                     |
| GO | transferase activity, transferring glycosy | 9  | 149 | 0.257 | 64131  | xylosyltransferase I                                                    |
| GO | transferase activity, transferring glycosy | 9  | 149 | 0.257 | 79623  | UDP-N-acetyl-alpha-D-galactosamine:polypeptide N-acetylgalactosaminyltr |
| GO | transferase activity, transferring glycosy | 9  | 149 | 0.257 | 79712  | glycosyltransferase-like domain containing 1                            |
| GO | transferase activity, transferring glycosy | 9  | 149 | 0.257 | 84752  | UDP-GlcNAc:betaGal beta-1,3-N-acetylglucosaminyltransferase 9           |
| GO | transferase activity, transferring glycosy | 9  | 149 | 0.257 | 9215   | like-glycosyltransferase                                                |
| GO | response to mechanical stimulus            | 3  | 38  | 0.258 | 5028   | purinergic receptor P2Y, G-protein coupled, 1                           |
| GO | response to mechanical stimulus            | 3  | 38  | 0.258 | 6347   | chemokine (C-C motif) ligand 2                                          |
| GO | response to mechanical stimulus            | 3  | 38  | 0.258 | 7078   | TIMP metalloproteinase inhibitor 3                                      |
| GO | antiporter activity                        | 3  | 38  | 0.258 | 55244  | solute carrier family 47, member 1                                      |
| GO | antiporter activity                        | 3  | 38  | 0.258 | 6546   | solute carrier family 8 (sodium/calcium exchanger), member 1            |
| GO | antiporter activity                        | 3  | 38  | 0.258 | 6549   | solute carrier family 9 (sodium/hydrogen exchanger), member 2           |
| GO | protein amino acid phosphorylation         | 26 | 488 | 0.262 | 10000  | v-akt murine thymoma viral oncogene homolog 3 (protein kinase B, gamma) |
| GO | protein amino acid phosphorylation         | 26 | 488 | 0.262 | 132158 | glycerate kinase                                                        |
| GO | protein amino acid phosphorylation         | 26 | 488 | 0.262 | 1716   | deoxyguanosine kinase                                                   |
| GO | protein amino acid phosphorylation         | 26 | 488 | 0.262 | 2045   | EPH receptor A7                                                         |
| GO | protein amino acid phosphorylation         | 26 | 488 | 0.262 | 2242   | feline sarcoma oncogene                                                 |
| GO | protein amino acid phosphorylation         | 26 | 488 | 0.262 | 2264   | fibroblast growth factor receptor 4                                     |

|    |                                    |    |     |       |                                                                                    |
|----|------------------------------------|----|-----|-------|------------------------------------------------------------------------------------|
| GO | protein amino acid phosphorylation | 26 | 488 | 0.262 | 2533 FYN binding protein (FYB-120/130)                                             |
| GO | protein amino acid phosphorylation | 26 | 488 | 0.262 | 2534 FYN oncogene related to SRC, FGR, YES                                         |
| GO | protein amino acid phosphorylation | 26 | 488 | 0.262 | 27330 ribosomal protein S6 kinase, 90kDa, polypeptide 6                            |
| GO | protein amino acid phosphorylation | 26 | 488 | 0.262 | 283455 kinase suppressor of ras 2                                                  |
| GO | protein amino acid phosphorylation | 26 | 488 | 0.262 | 3932 lymphocyte-specific protein tyrosine kinase                                   |
| GO | protein amino acid phosphorylation | 26 | 488 | 0.262 | 558 AXL receptor tyrosine kinase                                                   |
| GO | protein amino acid phosphorylation | 26 | 488 | 0.262 | 5588 protein kinase C, theta                                                       |
| GO | protein amino acid phosphorylation | 26 | 488 | 0.262 | 57144 p21 protein (Cdc42/Rac)-activated kinase 7                                   |
| GO | protein amino acid phosphorylation | 26 | 488 | 0.262 | 5754 PTK7 protein tyrosine kinase 7                                                |
| GO | protein amino acid phosphorylation | 26 | 488 | 0.262 | 6347 chemokine (C-C motif) ligand 2                                                |
| GO | protein amino acid phosphorylation | 26 | 488 | 0.262 | 659 bone morphogenetic protein receptor, type II (serine/threonine kinase)         |
| GO | protein amino acid phosphorylation | 26 | 488 | 0.262 | 7010 TEK tyrosine kinase, endothelial                                              |
| GO | protein amino acid phosphorylation | 26 | 488 | 0.262 | 7046 transforming growth factor, beta receptor 1                                   |
| GO | protein amino acid phosphorylation | 26 | 488 | 0.262 | 84206 mex-3 homolog B (C. elegans)                                                 |
| GO | protein amino acid phosphorylation | 26 | 488 | 0.262 | 8536 calcium/calmodulin-dependent protein kinase I                                 |
| GO | protein amino acid phosphorylation | 26 | 488 | 0.262 | 8997 kalirin, RhoGEF kinase                                                        |
| GO | protein amino acid phosphorylation | 26 | 488 | 0.262 | 9262 serine/threonine kinase 17b                                                   |
| GO | protein amino acid phosphorylation | 26 | 488 | 0.262 | 9448 mitogen-activated protein kinase kinase kinase kinase 4                       |
| GO | protein amino acid phosphorylation | 26 | 488 | 0.262 | 9535 glia maturation factor, gamma                                                 |
| GO | protein amino acid phosphorylation | 26 | 488 | 0.262 | 9833 maternal embryonic leucine zipper kinase                                      |
| GO | GTP binding                        | 19 | 347 | 0.262 | 10123 ADP-ribosylation factor-like 4C                                              |
| GO | GTP binding                        | 19 | 347 | 0.262 | 10672 guanine nucleotide binding protein (G protein), alpha 13                     |
| GO | GTP binding                        | 19 | 347 | 0.262 | 10890 RAB10, member RAS oncogene family                                            |
| GO | GTP binding                        | 19 | 347 | 0.262 | 121268 Ras homolog enriched in brain like 1                                        |
| GO | GTP binding                        | 19 | 347 | 0.262 | 1983 eukaryotic translation initiation factor 5                                    |
| GO | GTP binding                        | 19 | 347 | 0.262 | 23157 septin 6                                                                     |
| GO | GTP binding                        | 19 | 347 | 0.262 | 27289 Rho family GTPase 1                                                          |
| GO | GTP binding                        | 19 | 347 | 0.262 | 2774 guanine nucleotide binding protein (G protein), alpha activating activity pol |
| GO | GTP binding                        | 19 | 347 | 0.262 | 347733 tubulin, beta 2B                                                            |
| GO | GTP binding                        | 19 | 347 | 0.262 | 4830 non-metastatic cells 1, protein (NM23A) expressed in                          |
| GO | GTP binding                        | 19 | 347 | 0.262 | 4893 neuroblastoma RAS viral (v-ras) oncogene homolog                              |
| GO | GTP binding                        | 19 | 347 | 0.262 | 51062 atlastin GTPase 1                                                            |
| GO | GTP binding                        | 19 | 347 | 0.262 | 55207 ADP-ribosylation factor-like 8B                                              |
| GO | GTP binding                        | 19 | 347 | 0.262 | 55752 septin 11                                                                    |
| GO | GTP binding                        | 19 | 347 | 0.262 | 6242 rhotekin                                                                      |
| GO | GTP binding                        | 19 | 347 | 0.262 | 7846 tubulin, alpha 1a                                                             |

|    |                      |    |      |       |                                                                                                               |
|----|----------------------|----|------|-------|---------------------------------------------------------------------------------------------------------------|
| GO | GTP binding          | 19 | 347  | 0.262 | 79861 tubulin, alpha-like 3                                                                                   |
| GO | GTP binding          | 19 | 347  | 0.262 | 83871 RAB34, member RAS oncogene family                                                                       |
| GO | GTP binding          | 19 | 347  | 0.262 | 9732 dedicator of cytokinesis 4                                                                               |
| GO | transferase activity | 57 | 1127 | 0.268 | 10000 v-akt murine thymoma viral oncogene homolog 3 (protein kinase B, gamma)                                 |
| GO | transferase activity | 57 | 1127 | 0.268 | 131965 methyltransferase like 6                                                                               |
| GO | transferase activity | 57 | 1127 | 0.268 | 132158 glycerate kinase                                                                                       |
| GO | transferase activity | 57 | 1127 | 0.268 | 149281 methyltransferase like 11B                                                                             |
| GO | transferase activity | 57 | 1127 | 0.268 | 157570 establishment of cohesion 1 homolog 2 ( <i>S. cerevisiae</i> )                                         |
| GO | transferase activity | 57 | 1127 | 0.268 | 1716 deoxyguanosine kinase                                                                                    |
| GO | transferase activity | 57 | 1127 | 0.268 | 1787 tRNA aspartic acid methyltransferase 1                                                                   |
| GO | transferase activity | 57 | 1127 | 0.268 | 1788 DNA (cytosine-5-)-methyltransferase 3 alpha                                                              |
| GO | transferase activity | 57 | 1127 | 0.268 | 1841 deoxythymidylate kinase (thymidylate kinase)                                                             |
| GO | transferase activity | 57 | 1127 | 0.268 | 203 adenylate kinase 1                                                                                        |
| GO | transferase activity | 57 | 1127 | 0.268 | 2045 EPH receptor A7                                                                                          |
| GO | transferase activity | 57 | 1127 | 0.268 | 221357 glutathione S-transferase alpha 5                                                                      |
| GO | transferase activity | 57 | 1127 | 0.268 | 2242 feline sarcoma oncogene                                                                                  |
| GO | transferase activity | 57 | 1127 | 0.268 | 2264 fibroblast growth factor receptor 4                                                                      |
| GO | transferase activity | 57 | 1127 | 0.268 | 23057 nicotinamide nucleotide adenylyltransferase 2                                                           |
| GO | transferase activity | 57 | 1127 | 0.268 | 2321 fms-related tyrosine kinase 1 (vascular endothelial growth factor/vascular permeability factor receptor) |
| GO | transferase activity | 57 | 1127 | 0.268 | 23590 prenyl (decaprenyl) diphosphate synthase, subunit 1                                                     |
| GO | transferase activity | 57 | 1127 | 0.268 | 2534 FYN oncogene related to SRC, FGR, YES                                                                    |
| GO | transferase activity | 57 | 1127 | 0.268 | 25885 polymerase (RNA) I polypeptide A, 194kDa                                                                |
| GO | transferase activity | 57 | 1127 | 0.268 | 2618 phosphoribosylglycinamide formyltransferase, phosphoribosylglycinamide                                   |
| GO | transferase activity | 57 | 1127 | 0.268 | 2628 glycine amidinotransferase (L-arginine:glycine amidinotransferase)                                       |
| GO | transferase activity | 57 | 1127 | 0.268 | 27330 ribosomal protein S6 kinase, 90kDa, polypeptide 6                                                       |
| GO | transferase activity | 57 | 1127 | 0.268 | 283209 phosphoglucomutase 2-like 1                                                                            |
| GO | transferase activity | 57 | 1127 | 0.268 | 29922 non-metastatic cells 7, protein expressed in (nucleoside-diphosphate kinase)                            |
| GO | transferase activity | 57 | 1127 | 0.268 | 3157 3-hydroxy-3-methylglutaryl-Coenzyme A synthase 1 (soluble)                                               |
| GO | transferase activity | 57 | 1127 | 0.268 | 3276 protein arginine methyltransferase 1                                                                     |
| GO | transferase activity | 57 | 1127 | 0.268 | 345630 fibrillarin-like 1                                                                                     |
| GO | transferase activity | 57 | 1127 | 0.268 | 3932 lymphocyte-specific protein tyrosine kinase                                                              |
| GO | transferase activity | 57 | 1127 | 0.268 | 4830 non-metastatic cells 1, protein (NM23A) expressed in                                                     |
| GO | transferase activity | 57 | 1127 | 0.268 | 5110 protein-L-isoaspartate (D-aspartate) O-methyltransferase                                                 |
| GO | transferase activity | 57 | 1127 | 0.268 | 54822 transient receptor potential cation channel, subfamily M, member 7                                      |
| GO | transferase activity | 57 | 1127 | 0.268 | 55577 N-acetylglucosamine kinase                                                                              |
| GO | transferase activity | 57 | 1127 | 0.268 | 5558 primase, DNA, polypeptide 2 (58kDa)                                                                      |

|    |                         |    |      |       |        |                                                                        |
|----|-------------------------|----|------|-------|--------|------------------------------------------------------------------------|
| GO | transferase activity    | 57 | 1127 | 0.268 | 558    | AXL receptor tyrosine kinase                                           |
| GO | transferase activity    | 57 | 1127 | 0.268 | 5588   | protein kinase C, theta                                                |
| GO | transferase activity    | 57 | 1127 | 0.268 | 56339  | methyltransferase like 3                                               |
| GO | transferase activity    | 57 | 1127 | 0.268 | 56655  | polymerase (DNA-directed), epsilon 4 (p12 subunit)                     |
| GO | transferase activity    | 57 | 1127 | 0.268 | 57144  | p21 protein (Cdc42/Rac)-activated kinase 7                             |
| GO | transferase activity    | 57 | 1127 | 0.268 | 57678  | glycerol-3-phosphate acyltransferase, mitochondrial                    |
| GO | transferase activity    | 57 | 1127 | 0.268 | 5833   | phosphate cytidyltransferase 2, ethanolamine                           |
| GO | transferase activity    | 57 | 1127 | 0.268 | 586    | branched chain aminotransferase 1, cytosolic                           |
| GO | transferase activity    | 57 | 1127 | 0.268 | 64080  | ribokinase                                                             |
| GO | transferase activity    | 57 | 1127 | 0.268 | 659    | bone morphogenetic protein receptor, type II (serine/threonine kinase) |
| GO | transferase activity    | 57 | 1127 | 0.268 | 6820   | sulfotransferase family, cytosolic, 2B, member 1                       |
| GO | transferase activity    | 57 | 1127 | 0.268 | 7010   | TEK tyrosine kinase, endothelial                                       |
| GO | transferase activity    | 57 | 1127 | 0.268 | 7046   | transforming growth factor, beta receptor 1                            |
| GO | transferase activity    | 57 | 1127 | 0.268 | 7298   | thymidylate synthetase                                                 |
| GO | transferase activity    | 57 | 1127 | 0.268 | 79646  | pantothenate kinase 3                                                  |
| GO | transferase activity    | 57 | 1127 | 0.268 | 84172  | polymerase (RNA) I polypeptide B, 128kDa                               |
| GO | transferase activity    | 57 | 1127 | 0.268 | 8520   | histone acetyltransferase 1                                            |
| GO | transferase activity    | 57 | 1127 | 0.268 | 8536   | calcium/calmodulin-dependent protein kinase I                          |
| GO | transferase activity    | 57 | 1127 | 0.268 | 8997   | kalirin, RhoGEF kinase                                                 |
| GO | transferase activity    | 57 | 1127 | 0.268 | 91801  | alkB, alkylation repair homolog 8 (E. coli)                            |
| GO | transferase activity    | 57 | 1127 | 0.268 | 9262   | serine/threonine kinase 17b                                            |
| GO | transferase activity    | 57 | 1127 | 0.268 | 9448   | mitogen-activated protein kinase kinase kinase kinase 4                |
| GO | transferase activity    | 57 | 1127 | 0.268 | 9653   | heparan sulfate 2-O-sulfotransferase 1                                 |
| GO | transferase activity    | 57 | 1127 | 0.268 | 9833   | maternal embryonic leucine zipper kinase                               |
| GO | ion channel activity    | 9  | 151  | 0.269 | 1136   | cholinergic receptor, nicotinic, alpha 3                               |
| GO | ion channel activity    | 9  | 151  | 0.269 | 1138   | cholinergic receptor, nicotinic, alpha 5                               |
| GO | ion channel activity    | 9  | 151  | 0.269 | 200959 | gamma-aminobutyric acid (GABA) receptor, rho 3                         |
| GO | ion channel activity    | 9  | 151  | 0.269 | 2558   | gamma-aminobutyric acid (GABA) A receptor, alpha 5                     |
| GO | ion channel activity    | 9  | 151  | 0.269 | 2898   | glutamate receptor, ionotropic, kainate 2                              |
| GO | ion channel activity    | 9  | 151  | 0.269 | 5026   | purinergic receptor P2X, ligand-gated ion channel, 5                   |
| GO | ion channel activity    | 9  | 151  | 0.269 | 54822  | transient receptor potential cation channel, subfamily M, member 7     |
| GO | ion channel activity    | 9  | 151  | 0.269 | 55283  | mucolipin 3                                                            |
| GO | ion channel activity    | 9  | 151  | 0.269 | 7220   | transient receptor potential cation channel, subfamily C, member 1     |
| GO | potassium ion transport | 9  | 151  | 0.269 | 283518 | potassium channel regulator                                            |
| GO | potassium ion transport | 9  | 151  | 0.269 | 3751   | potassium voltage-gated channel, Shal-related subfamily, member 2      |
| GO | potassium ion transport | 9  | 151  | 0.269 | 3754   | potassium voltage-gated channel, subfamily F, member 1                 |

|    |                                      |   |     |       |       |                                                                           |
|----|--------------------------------------|---|-----|-------|-------|---------------------------------------------------------------------------|
| GO | potassium ion transport              | 9 | 151 | 0.269 | 3756  | potassium voltage-gated channel, subfamily H (eag-related), member 1      |
| GO | potassium ion transport              | 9 | 151 | 0.269 | 3763  | potassium inwardly-rectifying channel, subfamily J, member 6              |
| GO | potassium ion transport              | 9 | 151 | 0.269 | 3778  | potassium large conductance calcium-activated channel, subfamily M, alpha |
| GO | potassium ion transport              | 9 | 151 | 0.269 | 479   | ATPase, H+/K+ transporting, nongastric, alpha polypeptide                 |
| GO | potassium ion transport              | 9 | 151 | 0.269 | 56479 | potassium voltage-gated channel, KQT-like subfamily, member 5             |
| GO | potassium ion transport              | 9 | 151 | 0.269 | 6833  | ATP-binding cassette, sub-family C (CFTR/MRP), member 8                   |
| GO | epithelial cell differentiation      | 3 | 39  | 0.271 | 1282  | collagen, type IV, alpha 1                                                |
| GO | epithelial cell differentiation      | 3 | 39  | 0.271 | 7348  | uroplakin 1B                                                              |
| GO | epithelial cell differentiation      | 3 | 39  | 0.271 | 7490  | Wilms tumor 1                                                             |
| GO | intracellular protein kinase cascade | 6 | 94  | 0.271 | 10672 | guanine nucleotide binding protein (G protein), alpha 13                  |
| GO | intracellular protein kinase cascade | 6 | 94  | 0.271 | 2533  | FYN binding protein (FYB-120/130)                                         |
| GO | intracellular protein kinase cascade | 6 | 94  | 0.271 | 2534  | FYN oncogene related to SRC, FGR, YES                                     |
| GO | intracellular protein kinase cascade | 6 | 94  | 0.271 | 27330 | ribosomal protein S6 kinase, 90kDa, polypeptide 6                         |
| GO | intracellular protein kinase cascade | 6 | 94  | 0.271 | 9262  | serine/threonine kinase 17b                                               |
| GO | intracellular protein kinase cascade | 6 | 94  | 0.271 | 9448  | mitogen-activated protein kinase kinase kinase kinase 4                   |
| GO | muscle organ development             | 6 | 94  | 0.271 | 11149 | blood vessel epicardial substance                                         |
| GO | muscle organ development             | 6 | 94  | 0.271 | 2273  | four and a half LIM domains 1                                             |
| GO | muscle organ development             | 6 | 94  | 0.271 | 22801 | integrin, alpha 11                                                        |
| GO | muscle organ development             | 6 | 94  | 0.271 | 6442  | sarcoglycan, alpha (50kDa dystrophin-associated glycoprotein)             |
| GO | muscle organ development             | 6 | 94  | 0.271 | 6444  | sarcoglycan, delta (35kDa dystrophin-associated glycoprotein)             |
| GO | muscle organ development             | 6 | 94  | 0.271 | 6525  | smoothelin                                                                |
| GO | endonuclease activity                | 4 | 57  | 0.272 | 1775  | deoxyribonuclease I-like 2                                                |
| GO | endonuclease activity                | 4 | 57  | 0.272 | 2237  | flap structure-specific endonuclease 1                                    |
| GO | endonuclease activity                | 4 | 57  | 0.272 | 4968  | 8-oxoguanine DNA glycosylase                                              |
| GO | endonuclease activity                | 4 | 57  | 0.272 | 84083 | zinc finger, RAN-binding domain containing 3                              |
| GO | response to glucose stimulus         | 4 | 57  | 0.272 | 2281  | FK506 binding protein 1B, 12.6 kDa                                        |
| GO | response to glucose stimulus         | 4 | 57  | 0.272 | 5588  | protein kinase C, theta                                                   |
| GO | response to glucose stimulus         | 4 | 57  | 0.272 | 57678 | glycerol-3-phosphate acyltransferase, mitochondrial                       |
| GO | response to glucose stimulus         | 4 | 57  | 0.272 | 6546  | solute carrier family 8 (sodium/calcium exchanger), member 1              |
| GO | regulation of cell growth            | 4 | 57  | 0.272 | 2305  | forkhead box M1                                                           |
| GO | regulation of cell growth            | 4 | 57  | 0.272 | 5588  | protein kinase C, theta                                                   |
| GO | regulation of cell growth            | 4 | 57  | 0.272 | 5654  | HtrA serine peptidase 1                                                   |
| GO | regulation of cell growth            | 4 | 57  | 0.272 | 8835  | suppressor of cytokine signaling 2                                        |
| GO | liver development                    | 4 | 57  | 0.272 | 23705 | cell adhesion molecule 1                                                  |
| GO | liver development                    | 4 | 57  | 0.272 | 4763  | neurofibromin 1                                                           |
| GO | liver development                    | 4 | 57  | 0.272 | 5469  | mediator complex subunit 1                                                |

|    |                                            |    |     |       |        |                                                                   |
|----|--------------------------------------------|----|-----|-------|--------|-------------------------------------------------------------------|
| GO | liver development                          | 4  | 57  | 0.272 | 898    | cyclin E1                                                         |
| GO | placenta development                       | 2  | 22  | 0.272 | 1045   | caudal type homeobox 2                                            |
| GO | placenta development                       | 2  | 22  | 0.272 | 10761  | placenta-specific 1                                               |
| GO | germ cell development                      | 2  | 22  | 0.272 | 4436   | mutS homolog 2, colon cancer, nonpolyposis type 1 (E. coli)       |
| GO | germ cell development                      | 2  | 22  | 0.272 | 7490   | Wilms tumor 1                                                     |
| GO | microvillus                                | 2  | 22  | 0.272 | 5021   | oxytocin receptor                                                 |
| GO | microvillus                                | 2  | 22  | 0.272 | 7010   | TEK tyrosine kinase, endothelial                                  |
| GO | purinergic nucleotide receptor activity, i | 2  | 22  | 0.272 | 5028   | purinergic receptor P2Y, G-protein coupled, 1                     |
| GO | purinergic nucleotide receptor activity, i | 2  | 22  | 0.272 | 5031   | pyrimidineric receptor P2Y, G-protein coupled, 6                  |
| GO | voltage-gated calcium channel complex      | 2  | 22  | 0.272 | 5494   | protein phosphatase, Mg2+/Mn2+ dependent, 1A                      |
| GO | voltage-gated calcium channel complex      | 2  | 22  | 0.272 | 773    | calcium channel, voltage-dependent, P/Q type, alpha 1A subunit    |
| GO | basal plasma membrane                      | 2  | 22  | 0.272 | 667    | dystonin                                                          |
| GO | basal plasma membrane                      | 2  | 22  | 0.272 | 9635   | chloride channel accessory 2                                      |
| GO | cysteine-type peptidase activity           | 5  | 76  | 0.278 | 373856 | ubiquitin specific peptidase 41                                   |
| GO | cysteine-type peptidase activity           | 5  | 76  | 0.278 | 4287   | ataxin 3                                                          |
| GO | cysteine-type peptidase activity           | 5  | 76  | 0.278 | 57478  | ubiquitin specific peptidase 31                                   |
| GO | cysteine-type peptidase activity           | 5  | 76  | 0.278 | 7347   | ubiquitin carboxyl-terminal esterase L3 (ubiquitin thiolesterase) |
| GO | cysteine-type peptidase activity           | 5  | 76  | 0.278 | 84101  | ubiquitin specific peptidase 44                                   |
| GO | ribosome                                   | 10 | 172 | 0.278 | 11222  | mitochondrial ribosomal protein L3                                |
| GO | ribosome                                   | 10 | 172 | 0.278 | 28998  | mitochondrial ribosomal protein L13                               |
| GO | ribosome                                   | 10 | 172 | 0.278 | 51023  | mitochondrial ribosomal protein S18C                              |
| GO | ribosome                                   | 10 | 172 | 0.278 | 51121  | ribosomal protein L26-like 1                                      |
| GO | ribosome                                   | 10 | 172 | 0.278 | 54534  | mitochondrial ribosomal protein L50                               |
| GO | ribosome                                   | 10 | 172 | 0.278 | 6133   | ribosomal protein L9                                              |
| GO | ribosome                                   | 10 | 172 | 0.278 | 6154   | ribosomal protein L26                                             |
| GO | ribosome                                   | 10 | 172 | 0.278 | 6204   | ribosomal protein S10                                             |
| GO | ribosome                                   | 10 | 172 | 0.278 | 65003  | mitochondrial ribosomal protein L11                               |
| GO | ribosome                                   | 10 | 172 | 0.278 | 65008  | mitochondrial ribosomal protein L1                                |
| GO | regulation of apoptosis                    | 7  | 114 | 0.279 | 355    | Fas (TNF receptor superfamily, member 6)                          |
| GO | regulation of apoptosis                    | 7  | 114 | 0.279 | 4830   | non-metastatic cells 1, protein (NM23A) expressed in              |
| GO | regulation of apoptosis                    | 7  | 114 | 0.279 | 5245   | prohibitin                                                        |
| GO | regulation of apoptosis                    | 7  | 114 | 0.279 | 581    | BCL2-associated X protein                                         |
| GO | regulation of apoptosis                    | 7  | 114 | 0.279 | 597    | BCL2-related protein A1                                           |
| GO | regulation of apoptosis                    | 7  | 114 | 0.279 | 6662   | SRY (sex determining region Y)-box 9                              |
| GO | regulation of apoptosis                    | 7  | 114 | 0.279 | 672    | breast cancer 1, early onset                                      |
| GO | ribonucleoprotein complex                  | 6  | 95  | 0.279 | 10492  | synaptotagmin binding, cytoplasmic RNA interacting protein        |

|    |                                         |   |    |       |        |                                                                            |
|----|-----------------------------------------|---|----|-------|--------|----------------------------------------------------------------------------|
| GO | ribonucleoprotein complex               | 6 | 95 | 0.279 | 23658  | LSM5 homolog, U6 small nuclear RNA associated ( <i>S. cerevisiae</i> )     |
| GO | ribonucleoprotein complex               | 6 | 95 | 0.279 | 345630 | fibrillarin-like 1                                                         |
| GO | ribonucleoprotein complex               | 6 | 95 | 0.279 | 55323  | La ribonucleoprotein domain family, member 6                               |
| GO | ribonucleoprotein complex               | 6 | 95 | 0.279 | 672    | breast cancer 1, early onset                                               |
| GO | ribonucleoprotein complex               | 6 | 95 | 0.279 | 6741   | Sjogren syndrome antigen B (autoantigen La)                                |
| GO | regulation of cell shape                | 4 | 58 | 0.283 | 10395  | deleted in liver cancer 1                                                  |
| GO | regulation of cell shape                | 4 | 58 | 0.283 | 10672  | guanine nucleotide binding protein (G protein), alpha 13                   |
| GO | regulation of cell shape                | 4 | 58 | 0.283 | 11149  | blood vessel epicardial substance                                          |
| GO | regulation of cell shape                | 4 | 58 | 0.283 | 2534   | FYN oncogene related to SRC, FGR, YES                                      |
| GO | meiosis                                 | 4 | 58 | 0.283 | 132625 | zinc finger protein 42 homolog (mouse)                                     |
| GO | meiosis                                 | 4 | 58 | 0.283 | 254528 | chromosome 16 open reading frame 73                                        |
| GO | meiosis                                 | 4 | 58 | 0.283 | 286151 | F-box protein 43                                                           |
| GO | meiosis                                 | 4 | 58 | 0.283 | 29893  | PSMC3 interacting protein                                                  |
| GO | growth cone                             | 4 | 58 | 0.283 | 26059  | ELKS/RAB6-interacting/CAST family member 2                                 |
| GO | growth cone                             | 4 | 58 | 0.283 | 26230  | T-cell lymphoma invasion and metastasis 2                                  |
| GO | growth cone                             | 4 | 58 | 0.283 | 29767  | tropomodulin 2 (neuronal)                                                  |
| GO | growth cone                             | 4 | 58 | 0.283 | 5015   | orthodenticle homeobox 2                                                   |
| GO | alpha-catenin binding                   | 1 | 7  | 0.283 | 1000   | cadherin 2, type 1, N-cadherin (neuronal)                                  |
| GO | proteasome binding                      | 1 | 7  | 0.283 | 10213  | proteasome (prosome, macropain) 26S subunit, non-ATPase, 14                |
| GO | labyrinthine layer development          | 1 | 7  | 0.283 | 1045   | caudal type homeobox 2                                                     |
| GO | cyclosporin A binding                   | 1 | 7  | 0.283 | 10465  | peptidylprolyl isomerase H (cyclophilin H)                                 |
| GO | snoRNA binding                          | 1 | 7  | 0.283 | 10528  | NOP56 ribonucleoprotein homolog (yeast)                                    |
| GO | DNA-directed RNA polymerase III compl   | 1 | 7  | 0.283 | 10622  | polymerase (RNA) III (DNA directed) polypeptide G (32kD)                   |
| GO | nucleolar ribonuclease P complex        | 1 | 7  | 0.283 | 10799  | ribonuclease P/MRP 40kDa subunit                                           |
| GO | regulation of Cdc42 GTPase activity     | 1 | 7  | 0.283 | 11149  | blood vessel epicardial substance                                          |
| GO | cyclin-dependent protein kinase regulat | 1 | 7  | 0.283 | 1164   | CDC28 protein kinase regulatory subunit 2                                  |
| GO | fibril organization                     | 1 | 7  | 0.283 | 1289   | collagen, type V, alpha 1                                                  |
| GO | wound healing, spreading of epidermal   | 1 | 7  | 0.283 | 1289   | collagen, type V, alpha 1                                                  |
| GO | axon regeneration                       | 1 | 7  | 0.283 | 146760 | reticulon 4 receptor-like 1                                                |
| GO | brain morphogenesis                     | 1 | 7  | 0.283 | 1496   | catenin (cadherin-associated protein), alpha 2                             |
| GO | pyrimidine nucleotide biosynthetic proc | 1 | 7  | 0.283 | 1503   | CTP synthase                                                               |
| GO | steroid hydroxylase activity            | 1 | 7  | 0.283 | 1543   | cytochrome P450, family 1, subfamily A, polypeptide 1                      |
| GO | morphogenesis of an epithelial sheet    | 1 | 7  | 0.283 | 182    | jagged 1 (Alagille syndrome)                                               |
| GO | bile acid:sodium symporter activity     | 1 | 7  | 0.283 | 201780 | solute carrier family 10 (sodium/bile acid cotransporter family), member 4 |
| GO | spectrin binding                        | 1 | 7  | 0.283 | 2037   | erythrocyte membrane protein band 4.1-like 2                               |
| GO | death                                   | 1 | 7  | 0.283 | 2149   | coagulation factor II (thrombin) receptor                                  |

|    |                                           |   |   |       |        |                                                                                    |
|----|-------------------------------------------|---|---|-------|--------|------------------------------------------------------------------------------------|
| GO | mitotic anaphase                          | 1 | 7 | 0.283 | 220134 | spindle and kinetochore associated complex subunit 1                               |
| GO | NAD biosynthetic process                  | 1 | 7 | 0.283 | 23057  | nicotinamide nucleotide adenylyltransferase 2                                      |
| GO | Ras guanyl-nucleotide exchange factor a   | 1 | 7 | 0.283 | 25780  | RAS guanyl releasing protein 3 (calcium and DAG-regulated)                         |
| GO | cellular homeostasis                      | 1 | 7 | 0.283 | 26154  | ATP-binding cassette, sub-family A (ABC1), member 12                               |
| GO | response to mercury ion                   | 1 | 7 | 0.283 | 2628   | glycine amidinotransferase (L-arginine:glycine amidinotransferase)                 |
| GO | BBSome                                    | 1 | 7 | 0.283 | 27241  | Bardet-Biedl syndrome 9                                                            |
| GO | synaptic vesicle exocytosis               | 1 | 7 | 0.283 | 27445  | piccolo (presynaptic cytomatrix protein)                                           |
| GO | response to selenium ion                  | 1 | 7 | 0.283 | 2878   | glutathione peroxidase 3 (plasma)                                                  |
| GO | kainate selective glutamate receptor ac   | 1 | 7 | 0.283 | 2898   | glutamate receptor, ionotropic, kainate 2                                          |
| GO | regulation of JNK cascade                 | 1 | 7 | 0.283 | 2898   | glutamate receptor, ionotropic, kainate 2                                          |
| GO | glutamate binding                         | 1 | 7 | 0.283 | 2906   | glutamate receptor, ionotropic, N-methyl D-aspartate 2D                            |
| GO | neurotransmitter binding                  | 1 | 7 | 0.283 | 2906   | glutamate receptor, ionotropic, N-methyl D-aspartate 2D                            |
| GO | 3-hydroxyacyl-CoA dehydrogenase activ     | 1 | 7 | 0.283 | 3028   | hydroxysteroid (17-beta) dehydrogenase 10                                          |
| GO | cellular zinc ion homeostasis             | 1 | 7 | 0.283 | 3932   | lymphocyte-specific protein tyrosine kinase                                        |
| GO | central nervous system neuron develop     | 1 | 7 | 0.283 | 3952   | leptin                                                                             |
| GO | fatty acid catabolic process              | 1 | 7 | 0.283 | 3952   | leptin                                                                             |
| GO | urogenital system development             | 1 | 7 | 0.283 | 3975   | LIM homeobox 1                                                                     |
| GO | cell chemotaxis                           | 1 | 7 | 0.283 | 409    | arrestin, beta 2                                                                   |
| GO | oxidative phosphorylation                 | 1 | 7 | 0.283 | 4436   | mutS homolog 2, colon cancer, nonpolyposis type 1 (E. coli)                        |
| GO | unconventional myosin complex             | 1 | 7 | 0.283 | 4637   | myosin, light chain 6, alkali, smooth muscle and non-muscle                        |
| GO | protein targeting to lysosome             | 1 | 7 | 0.283 | 4734   | neural precursor cell expressed, developmentally down-regulated 4                  |
| GO | regulation of cell-matrix adhesion        | 1 | 7 | 0.283 | 4763   | neurofibromin 1                                                                    |
| GO | monovalent inorganic cation transmembr    | 1 | 7 | 0.283 | 479    | ATPase, H <sup>+</sup> /K <sup>+</sup> transporting, nongastric, alpha polypeptide |
| GO | ankyrin binding                           | 1 | 7 | 0.283 | 4897   | neuronal cell adhesion molecule                                                    |
| GO | maternal behavior                         | 1 | 7 | 0.283 | 5021   | oxytocin receptor                                                                  |
| GO | positive regulation of synaptic transmiss | 1 | 7 | 0.283 | 5021   | oxytocin receptor                                                                  |
| GO | extracellular ATP-gated cation channel a  | 1 | 7 | 0.283 | 5026   | purinergic receptor P2X, ligand-gated ion channel, 5                               |
| GO | purinergic nucleotide receptor activity   | 1 | 7 | 0.283 | 5026   | purinergic receptor P2X, ligand-gated ion channel, 5                               |
| GO | regulation of vasodilation                | 1 | 7 | 0.283 | 5028   | purinergic receptor P2Y, G-protein coupled, 1                                      |
| GO | cellular response to lipopolysaccharide   | 1 | 7 | 0.283 | 5054   | serpin peptidase inhibitor, clade E (nexin, plasminogen activator inhibitor t      |
| GO | peptide biosynthetic process              | 1 | 7 | 0.283 | 5125   | proprotein convertase subtilisin/kexin type 5                                      |
| GO | extrinsic to plasma membrane              | 1 | 7 | 0.283 | 54843  | synaptotagmin-like 2                                                               |
| GO | negative regulation of catalytic activity | 1 | 7 | 0.283 | 5569   | protein kinase (cAMP-dependent, catalytic) inhibitor alpha                         |
| GO | fructose-2,6-bisphosphate 2-phosphata     | 1 | 7 | 0.283 | 57103  | chromosome 12 open reading frame 5                                                 |
| GO | regulation of protein homodimerization    | 1 | 7 | 0.283 | 581    | BCL2-associated X protein                                                          |
| GO | GTP-Rho binding                           | 1 | 7 | 0.283 | 6242   | rhotekin                                                                           |



|    |                                            |   |     |       |                                                                               |
|----|--------------------------------------------|---|-----|-------|-------------------------------------------------------------------------------|
| GO | positive regulation of alpha-beta T cell p | 1 | 7   | 0.283 | 641 Bloom syndrome, RecQ helicase-like                                        |
| GO | pronucleus                                 | 1 | 7   | 0.283 | 641 Bloom syndrome, RecQ helicase-like                                        |
| GO | organic cation transmembrane transpor      | 1 | 7   | 0.283 | 6580 solute carrier family 22 (organic cation transporter), member 1          |
| GO | U7 snRNP                                   | 1 | 7   | 0.283 | 6637 small nuclear ribonucleoprotein polypeptide G                            |
| GO | adenohypophysis development                | 1 | 7   | 0.283 | 6657 SRY (sex determining region Y)-box 2                                     |
| GO | negative regulation of bone mineralizati   | 1 | 7   | 0.283 | 6662 SRY (sex determining region Y)-box 9                                     |
| GO | negative regulation of myoblast differer   | 1 | 7   | 0.283 | 6662 SRY (sex determining region Y)-box 9                                     |
| GO | BRCA1-A complex                            | 1 | 7   | 0.283 | 672 breast cancer 1, early onset                                              |
| GO | transmembrane receptor protein serine      | 1 | 7   | 0.283 | 7046 transforming growth factor, beta receptor 1                              |
| GO | type II transforming growth factor beta    | 1 | 7   | 0.283 | 7046 transforming growth factor, beta receptor 1                              |
| GO | contractile fiber                          | 1 | 7   | 0.283 | 7137 troponin I type 3 (cardiac)                                              |
| GO | coenzyme A biosynthetic process            | 1 | 7   | 0.283 | 79646 pantothenate kinase 3                                                   |
| GO | filopodium membrane                        | 1 | 7   | 0.283 | 84168 anthrax toxin receptor 1                                                |
| GO | semaphorin receptor activity               | 1 | 7   | 0.283 | 91584 plexin A4                                                               |
| GO | male gonad development                     | 3 | 40  | 0.284 | 132625 zinc finger protein 42 homolog (mouse)                                 |
| GO | male gonad development                     | 3 | 40  | 0.284 | 4436 mutS homolog 2, colon cancer, nonpolyposis type 1 (E. coli)              |
| GO | male gonad development                     | 3 | 40  | 0.284 | 7490 Wilms tumor 1                                                            |
| GO | non-membrane spanning protein tyrosin      | 3 | 40  | 0.284 | 2242 feline sarcoma oncogene                                                  |
| GO | non-membrane spanning protein tyrosin      | 3 | 40  | 0.284 | 2534 FYN oncogene related to SRC, FGR, YES                                    |
| GO | non-membrane spanning protein tyrosin      | 3 | 40  | 0.284 | 3932 lymphocyte-specific protein tyrosine kinase                              |
| GO | dendritic spine                            | 3 | 40  | 0.284 | 3751 potassium voltage-gated channel, Shal-related subfamily, member 2        |
| GO | dendritic spine                            | 3 | 40  | 0.284 | 55752 septin 11                                                               |
| GO | dendritic spine                            | 3 | 40  | 0.284 | 9419 cysteine-rich PDZ-binding protein                                        |
| GO | brain development                          | 7 | 115 | 0.286 | 1746 distal-less homeobox 2                                                   |
| GO | brain development                          | 7 | 115 | 0.286 | 2558 gamma-aminobutyric acid (GABA) A receptor, alpha 5                       |
| GO | brain development                          | 7 | 115 | 0.286 | 266727 MAM domain containing glycosylphosphatidylinositol anchor 1            |
| GO | brain development                          | 7 | 115 | 0.286 | 4763 neurofibromin 1                                                          |
| GO | brain development                          | 7 | 115 | 0.286 | 5028 purinergic receptor P2Y, G-protein coupled, 1                            |
| GO | brain development                          | 7 | 115 | 0.286 | 5469 mediator complex subunit 1                                               |
| GO | brain development                          | 7 | 115 | 0.286 | 6586 slit homolog 3 (Drosophila)                                              |
| GO | condensed nuclear chromosome               | 2 | 23  | 0.29  | 1045 caudal type homeobox 2                                                   |
| GO | condensed nuclear chromosome               | 2 | 23  | 0.29  | 84365 MKI67 (FHA domain) interacting nucleolar phosphoprotein                 |
| GO | neuromuscular process controlling balai    | 2 | 23  | 0.29  | 3778 potassium large conductance calcium-activated channel, subfamily M, alph |
| GO | neuromuscular process controlling balai    | 2 | 23  | 0.29  | 773 calcium channel, voltage-dependent, P/Q type, alpha 1A subunit            |
| GO | positive regulation of cAMP biosyntheti    | 2 | 23  | 0.29  | 4158 melanocortin 2 receptor (adrenocorticotrophic hormone)                   |
| GO | positive regulation of cAMP biosyntheti    | 2 | 23  | 0.29  | 5744 parathyroid hormone-like hormone                                         |

|    |                                                                      |    |     |       |                                                                            |
|----|----------------------------------------------------------------------|----|-----|-------|----------------------------------------------------------------------------|
| GO | chromosome, telomeric region                                         | 2  | 23  | 0.29  | 54984 PIN2-interacting protein 1                                           |
| GO | chromosome, telomeric region                                         | 2  | 23  | 0.29  | 641 Bloom syndrome, RecQ helicase-like                                     |
| GO | regulation of ARF GTPase activity                                    | 2  | 23  | 0.29  | 55803 ArfGAP with dual PH domains 2                                        |
| GO | regulation of ARF GTPase activity                                    | 2  | 23  | 0.29  | 9744 ArfGAP with coiled-coil, ankyrin repeat and PH domains 1              |
| GO | positive regulation of osteoblast differentiation                    | 2  | 23  | 0.29  | 659 bone morphogenetic protein receptor, type II (serine/threonine kinase) |
| GO | positive regulation of osteoblast differentiation                    | 2  | 23  | 0.29  | 9260 PDZ and LIM domain 7 (enigma)                                         |
| GO | Wnt receptor signaling pathway through Frizzled                      | 2  | 23  | 0.29  | 6659 SRY (sex determining region Y)-box 4                                  |
| GO | Wnt receptor signaling pathway through Frizzled                      | 2  | 23  | 0.29  | 8325 frizzled homolog 8 (Drosophila)                                       |
| GO | thymus development                                                   | 2  | 23  | 0.29  | 6899 T-box 1                                                               |
| GO | thymus development                                                   | 2  | 23  | 0.29  | 7046 transforming growth factor, beta receptor 1                           |
| GO | cytoplasmic mRNA processing body                                     | 2  | 23  | 0.29  | 84206 mex-3 homolog B (C. elegans)                                         |
| GO | cytoplasmic mRNA processing body                                     | 2  | 23  | 0.29  | 92312 mex-3 homolog A (C. elegans)                                         |
| GO | negative regulation of protein kinase activity                       | 3  | 41  | 0.297 | 11142 protein kinase (cAMP-dependent, catalytic) inhibitor gamma           |
| GO | negative regulation of protein kinase activity                       | 3  | 41  | 0.297 | 4763 neurofibromin 1                                                       |
| GO | negative regulation of protein kinase activity                       | 3  | 41  | 0.297 | 5569 protein kinase (cAMP-dependent, catalytic) inhibitor alpha            |
| GO | positive regulation of transcription from RNA polymerase II promoter | 16 | 295 | 0.297 | 11278 Kruppel-like factor 12                                               |
| GO | positive regulation of transcription from RNA polymerase II promoter | 16 | 295 | 0.297 | 1746 distal-less homeobox 2                                                |
| GO | positive regulation of transcription from RNA polymerase II promoter | 16 | 295 | 0.297 | 2736 GLI family zinc finger 2                                              |
| GO | positive regulation of transcription from RNA polymerase II promoter | 16 | 295 | 0.297 | 2965 general transcription factor IIH, polypeptide 1, 62kDa                |
| GO | positive regulation of transcription from RNA polymerase II promoter | 16 | 295 | 0.297 | 29893 PSMC3 interacting protein                                            |
| GO | positive regulation of transcription from RNA polymerase II promoter | 16 | 295 | 0.297 | 3236 homeobox D10                                                          |
| GO | positive regulation of transcription from RNA polymerase II promoter | 16 | 295 | 0.297 | 3589 interleukin 11                                                        |
| GO | positive regulation of transcription from RNA polymerase II promoter | 16 | 295 | 0.297 | 3624 inhibin, beta A                                                       |
| GO | positive regulation of transcription from RNA polymerase II promoter | 16 | 295 | 0.297 | 406 aryl hydrocarbon receptor nuclear translocator-like                    |
| GO | positive regulation of transcription from RNA polymerase II promoter | 16 | 295 | 0.297 | 5469 mediator complex subunit 1                                            |
| GO | positive regulation of transcription from RNA polymerase II promoter | 16 | 295 | 0.297 | 58499 zinc finger protein 462                                              |
| GO | positive regulation of transcription from RNA polymerase II promoter | 16 | 295 | 0.297 | 6299 sal-like 1 (Drosophila)                                               |
| GO | positive regulation of transcription from RNA polymerase II promoter | 16 | 295 | 0.297 | 6657 SRY (sex determining region Y)-box 2                                  |
| GO | positive regulation of transcription from RNA polymerase II promoter | 16 | 295 | 0.297 | 6662 SRY (sex determining region Y)-box 9                                  |
| GO | positive regulation of transcription from RNA polymerase II promoter | 16 | 295 | 0.297 | 7490 Wilms tumor 1                                                         |
| GO | positive regulation of transcription from RNA polymerase II promoter | 16 | 295 | 0.297 | 8626 tumor protein p63                                                     |
| GO | GTPase activator activity                                            | 9  | 156 | 0.3   | 10395 deleted in liver cancer 1                                            |
| GO | GTPase activator activity                                            | 9  | 156 | 0.3   | 1121 choroideremia (Rab escort protein 1)                                  |
| GO | GTPase activator activity                                            | 9  | 156 | 0.3   | 1123 chimerin (chimaerin) 1                                                |
| GO | GTPase activator activity                                            | 9  | 156 | 0.3   | 51256 TBC1 domain family, member 7                                         |
| GO | GTPase activator activity                                            | 9  | 156 | 0.3   | 55789 DEP domain containing 1B                                             |

|    |                           |    |      |       |                                                                                |
|----|---------------------------|----|------|-------|--------------------------------------------------------------------------------|
| GO | GTPase activator activity | 9  | 156  | 0.3   | 55803 ArfGAP with dual PH domains 2                                            |
| GO | GTPase activator activity | 9  | 156  | 0.3   | 8490 regulator of G-protein signaling 5                                        |
| GO | GTPase activator activity | 9  | 156  | 0.3   | 9882 TBC1 domain family, member 4                                              |
| GO | GTPase activator activity | 9  | 156  | 0.3   | 9910 RAB GTPase activating protein 1-like                                      |
| GO | chromatin binding         | 9  | 156  | 0.3   | 113130 cell division cycle associated 5                                        |
| GO | chromatin binding         | 9  | 156  | 0.3   | 1746 distal-less homeobox 2                                                    |
| GO | chromatin binding         | 9  | 156  | 0.3   | 1788 DNA (cytosine-5-)-methyltransferase 3 alpha                               |
| GO | chromatin binding         | 9  | 156  | 0.3   | 2736 GLI family zinc finger 2                                                  |
| GO | chromatin binding         | 9  | 156  | 0.3   | 3236 homeobox D10                                                              |
| GO | chromatin binding         | 9  | 156  | 0.3   | 5469 mediator complex subunit 1                                                |
| GO | chromatin binding         | 9  | 156  | 0.3   | 6657 SRY (sex determining region Y)-box 2                                      |
| GO | chromatin binding         | 9  | 156  | 0.3   | 8626 tumor protein p63                                                         |
| GO | chromatin binding         | 9  | 156  | 0.3   | 91442 chromosome 19 open reading frame 40                                      |
| GO | hormone activity          | 5  | 79   | 0.305 | 3624 inhibin, beta A                                                           |
| GO | hormone activity          | 5  | 79   | 0.305 | 3952 leptin                                                                    |
| GO | hormone activity          | 5  | 79   | 0.305 | 5744 parathyroid hormone-like hormone                                          |
| GO | hormone activity          | 5  | 79   | 0.305 | 57817 hepcidin antimicrobial peptide                                           |
| GO | hormone activity          | 5  | 79   | 0.305 | 6019 relaxin 2                                                                 |
| GO | extracellular region      | 85 | 1730 | 0.305 | 10512 sema domain, immunoglobulin domain (Ig), short basic domain, secreted, ( |
| GO | extracellular region      | 85 | 1730 | 0.305 | 10761 placenta-specific 1                                                      |
| GO | extracellular region      | 85 | 1730 | 0.305 | 10893 matrix metalloproteinase 24 (membrane-inserted)                          |
| GO | extracellular region      | 85 | 1730 | 0.305 | 11010 GLI pathogenesis-related 1                                               |
| GO | extracellular region      | 85 | 1730 | 0.305 | 11249 neurexophilin 2                                                          |
| GO | extracellular region      | 85 | 1730 | 0.305 | 115908 collagen triple helix repeat containing 1                               |
| GO | extracellular region      | 85 | 1730 | 0.305 | 12 serpin peptidase inhibitor, clade A (alpha-1 antitrypsin, antitrypsin), me  |
| GO | extracellular region      | 85 | 1730 | 0.305 | 1282 collagen, type IV, alpha 1                                                |
| GO | extracellular region      | 85 | 1730 | 0.305 | 1284 collagen, type IV, alpha 2                                                |
| GO | extracellular region      | 85 | 1730 | 0.305 | 1288 collagen, type IV, alpha 6                                                |
| GO | extracellular region      | 85 | 1730 | 0.305 | 1289 collagen, type V, alpha 1                                                 |
| GO | extracellular region      | 85 | 1730 | 0.305 | 1290 collagen, type V, alpha 2                                                 |
| GO | extracellular region      | 85 | 1730 | 0.305 | 1301 collagen, type XI, alpha 1                                                |
| GO | extracellular region      | 85 | 1730 | 0.305 | 131450 CD200 receptor 1                                                        |
| GO | extracellular region      | 85 | 1730 | 0.305 | 132724 transmembrane protease, serine 11B                                      |
| GO | extracellular region      | 85 | 1730 | 0.305 | 1379 complement component (3b/4b) receptor 1-like                              |
| GO | extracellular region      | 85 | 1730 | 0.305 | 140902 R3H domain containing-like                                              |
| GO | extracellular region      | 85 | 1730 | 0.305 | 143282 fibroblast growth factor binding protein 3                              |

|    |                      |    |      |       |        |                                                                              |
|----|----------------------|----|------|-------|--------|------------------------------------------------------------------------------|
| GO | extracellular region | 85 | 1730 | 0.305 | 145864 | hyaluronan and proteoglycan link protein 3                                   |
| GO | extracellular region | 85 | 1730 | 0.305 | 146556 | chromosome 16 open reading frame 89                                          |
| GO | extracellular region | 85 | 1730 | 0.305 | 147920 | IGF-like family member 2                                                     |
| GO | extracellular region | 85 | 1730 | 0.305 | 152007 | GLI pathogenesis-related 2                                                   |
| GO | extracellular region | 85 | 1730 | 0.305 | 152816 | chromosome 4 open reading frame 26                                           |
| GO | extracellular region | 85 | 1730 | 0.305 | 162681 | chromosome 18 open reading frame 54                                          |
| GO | extracellular region | 85 | 1730 | 0.305 | 1690   | coagulation factor C homolog, cochlin (Limulus polyphemus)                   |
| GO | extracellular region | 85 | 1730 | 0.305 | 1775   | deoxyribonuclease I-like 2                                                   |
| GO | extracellular region | 85 | 1730 | 0.305 | 182    | jagged 1 (Alagille syndrome)                                                 |
| GO | extracellular region | 85 | 1730 | 0.305 | 2135   | exostoses (multiple)-like 2                                                  |
| GO | extracellular region | 85 | 1730 | 0.305 | 219990 | placenta-specific 1-like                                                     |
| GO | extracellular region | 85 | 1730 | 0.305 | 221044 | upper zone of growth plate and cartilage matrix associated                   |
| GO | extracellular region | 85 | 1730 | 0.305 | 2321   | fms-related tyrosine kinase 1 (vascular endothelial growth factor/vascular p |
| GO | extracellular region | 85 | 1730 | 0.305 | 24147  | four jointed box 1 (Drosophila)                                              |
| GO | extracellular region | 85 | 1730 | 0.305 | 245929 | defensin, beta 115                                                           |
| GO | extracellular region | 85 | 1730 | 0.305 | 25817  | family with sequence similarity 19 (chemokine (C-C motif)-like), member A'   |
| GO | extracellular region | 85 | 1730 | 0.305 | 25884  | chordin-like 2                                                               |
| GO | extracellular region | 85 | 1730 | 0.305 | 26577  | procollagen C-endopeptidase enhancer 2                                       |
| GO | extracellular region | 85 | 1730 | 0.305 | 284207 | meteorin, glial cell differentiation regulator-like                          |
| GO | extracellular region | 85 | 1730 | 0.305 | 2878   | glutathione peroxidase 3 (plasma)                                            |
| GO | extracellular region | 85 | 1730 | 0.305 | 341    | apolipoprotein C-I                                                           |
| GO | extracellular region | 85 | 1730 | 0.305 | 348    | apolipoprotein E                                                             |
| GO | extracellular region | 85 | 1730 | 0.305 | 355    | Fas (TNF receptor superfamily, member 6)                                     |
| GO | extracellular region | 85 | 1730 | 0.305 | 3557   | interleukin 1 receptor antagonist                                            |
| GO | extracellular region | 85 | 1730 | 0.305 | 3589   | interleukin 11                                                               |
| GO | extracellular region | 85 | 1730 | 0.305 | 3624   | inhibin, beta A                                                              |
| GO | extracellular region | 85 | 1730 | 0.305 | 374897 | suprabasin                                                                   |
| GO | extracellular region | 85 | 1730 | 0.305 | 374918 | IGF-like family member 1                                                     |
| GO | extracellular region | 85 | 1730 | 0.305 | 388555 | IGF-like family member 3                                                     |
| GO | extracellular region | 85 | 1730 | 0.305 | 3918   | laminin, gamma 2                                                             |
| GO | extracellular region | 85 | 1730 | 0.305 | 3952   | leptin                                                                       |
| GO | extracellular region | 85 | 1730 | 0.305 | 4052   | latent transforming growth factor beta binding protein 1                     |
| GO | extracellular region | 85 | 1730 | 0.305 | 4060   | lumican                                                                      |
| GO | extracellular region | 85 | 1730 | 0.305 | 4312   | matrix metalloproteinase 1 (interstitial collagenase)                        |
| GO | extracellular region | 85 | 1730 | 0.305 | 4318   | matrix metalloproteinase 9 (gelatinase B, 92kDa gelatinase, 92kDa type IV c  |
| GO | extracellular region | 85 | 1730 | 0.305 | 4319   | matrix metalloproteinase 10 (stromelysin 2)                                  |

|    |                               |    |      |       |                                                                                    |
|----|-------------------------------|----|------|-------|------------------------------------------------------------------------------------|
| GO | extracellular region          | 85 | 1730 | 0.305 | 5054 serpin peptidase inhibitor, clade E (nexin, plasminogen activator inhibitor t |
| GO | extracellular region          | 85 | 1730 | 0.305 | 51050 peptidase inhibitor 15                                                       |
| GO | extracellular region          | 85 | 1730 | 0.305 | 5125 proprotein convertase subtilisin/kexin type 5                                 |
| GO | extracellular region          | 85 | 1730 | 0.305 | 5228 placental growth factor                                                       |
| GO | extracellular region          | 85 | 1730 | 0.305 | 5341 pleckstrin                                                                    |
| GO | extracellular region          | 85 | 1730 | 0.305 | 5360 phospholipid transfer protein                                                 |
| GO | extracellular region          | 85 | 1730 | 0.305 | 54210 triggering receptor expressed on myeloid cells 1                             |
| GO | extracellular region          | 85 | 1730 | 0.305 | 5624 protein C (inactivator of coagulation factors Va and VIIIa)                   |
| GO | extracellular region          | 85 | 1730 | 0.305 | 5654 HtrA serine peptidase 1                                                       |
| GO | extracellular region          | 85 | 1730 | 0.305 | 5744 parathyroid hormone-like hormone                                              |
| GO | extracellular region          | 85 | 1730 | 0.305 | 57642 collagen, type XX, alpha 1                                                   |
| GO | extracellular region          | 85 | 1730 | 0.305 | 57817 hepcidin antimicrobial peptide                                               |
| GO | extracellular region          | 85 | 1730 | 0.305 | 590 butyrylcholinesterase                                                          |
| GO | extracellular region          | 85 | 1730 | 0.305 | 6019 relaxin 2                                                                     |
| GO | extracellular region          | 85 | 1730 | 0.305 | 60675 prokineticin 2                                                               |
| GO | extracellular region          | 85 | 1730 | 0.305 | 6347 chemokine (C-C motif) ligand 2                                                |
| GO | extracellular region          | 85 | 1730 | 0.305 | 64131 xylosyltransferase I                                                         |
| GO | extracellular region          | 85 | 1730 | 0.305 | 6422 secreted frizzled-related protein 1                                           |
| GO | extracellular region          | 85 | 1730 | 0.305 | 6586 slit homolog 3 (Drosophila)                                                   |
| GO | extracellular region          | 85 | 1730 | 0.305 | 6695 sparco/osteonectin, cwcv and kazal-like domains proteoglycan (testican) 1     |
| GO | extracellular region          | 85 | 1730 | 0.305 | 7037 transferrin receptor (p90, CD71)                                              |
| GO | extracellular region          | 85 | 1730 | 0.305 | 7058 thrombospondin 2                                                              |
| GO | extracellular region          | 85 | 1730 | 0.305 | 7078 TIMP metalloproteinase inhibitor 3                                            |
| GO | extracellular region          | 85 | 1730 | 0.305 | 7113 transmembrane protease, serine 2                                              |
| GO | extracellular region          | 85 | 1730 | 0.305 | 7481 wntless-type MMTV integration site family, member 11                          |
| GO | extracellular region          | 85 | 1730 | 0.305 | 7857 secretogranin II (chromogranin C)                                             |
| GO | extracellular region          | 85 | 1730 | 0.305 | 79135 apolipoprotein O                                                             |
| GO | extracellular region          | 85 | 1730 | 0.305 | 81029 wntless-type MMTV integration site family, member 5B                         |
| GO | extracellular region          | 85 | 1730 | 0.305 | 9244 cytokine receptor-like factor 1                                               |
| GO | extracellular region          | 85 | 1730 | 0.305 | 9542 neuregulin 2                                                                  |
| GO | extracellular region          | 85 | 1730 | 0.305 | 9635 chloride channel accessory 2                                                  |
| GO | learning                      | 2  | 24   | 0.307 | 2534 FYN oncogene related to SRC, FGR, YES                                         |
| GO | learning                      | 2  | 24   | 0.307 | 590 butyrylcholinesterase                                                          |
| GO | visual learning               | 2  | 24   | 0.307 | 4763 neurofibromin 1                                                               |
| GO | visual learning               | 2  | 24   | 0.307 | 4893 neuroblastoma RAS viral (v-ras) oncogene homolog                              |
| GO | ARF GTPase activator activity | 2  | 24   | 0.307 | 55803 ArfGAP with dual PH domains 2                                                |

|    |                                         |   |    |       |        |                                                                        |
|----|-----------------------------------------|---|----|-------|--------|------------------------------------------------------------------------|
| GO | ARF GTPase activator activity           | 2 | 24 | 0.307 | 9744   | ArfGAP with coiled-coil, ankyrin repeat and PH domains 1               |
| GO | cellular iron ion homeostasis           | 2 | 24 | 0.307 | 57817  | hepcidin antimicrobial peptide                                         |
| GO | cellular iron ion homeostasis           | 2 | 24 | 0.307 | 7037   | transferrin receptor (p90, CD71)                                       |
| GO | lung alveolus development               | 2 | 24 | 0.307 | 659    | bone morphogenetic protein receptor, type II (serine/threonine kinase) |
| GO | lung alveolus development               | 2 | 24 | 0.307 | 6657   | SRY (sex determining region Y)-box 2                                   |
| GO | regulation of protein metabolic process | 3 | 42 | 0.31  | 140739 | ubiquitin-conjugating enzyme E2F (putative)                            |
| GO | regulation of protein metabolic process | 3 | 42 | 0.31  | 389898 | ubiquitin-conjugating enzyme E2N-like                                  |
| GO | regulation of protein metabolic process | 3 | 42 | 0.31  | 7324   | ubiquitin-conjugating enzyme E2E 1 (UBC4/5 homolog, yeast)             |
| GO | cell growth                             | 3 | 42 | 0.31  | 2273   | four and a half LIM domains 1                                          |
| GO | cell growth                             | 3 | 42 | 0.31  | 65009  | NDRG family member 4                                                   |
| GO | cell growth                             | 3 | 42 | 0.31  | 773    | calcium channel, voltage-dependent, P/Q type, alpha 1A subunit         |
| GO | RNA processing                          | 5 | 80 | 0.314 | 10199  | M-phase phosphoprotein 10 (U3 small nucleolar ribonucleoprotein)       |
| GO | RNA processing                          | 5 | 80 | 0.314 | 10492  | synaptotagmin binding, cytoplasmic RNA interacting protein             |
| GO | RNA processing                          | 5 | 80 | 0.314 | 55323  | La ribonucleoprotein domain family, member 6                           |
| GO | RNA processing                          | 5 | 80 | 0.314 | 65008  | mitochondrial ribosomal protein L1                                     |
| GO | RNA processing                          | 5 | 80 | 0.314 | 6741   | Sjogren syndrome antigen B (autoantigen La)                            |
| GO | basement membrane                       | 4 | 61 | 0.314 | 1289   | collagen, type V, alpha 1                                              |
| GO | basement membrane                       | 4 | 61 | 0.314 | 3918   | laminin, gamma 2                                                       |
| GO | basement membrane                       | 4 | 61 | 0.314 | 667    | dystonin                                                               |
| GO | basement membrane                       | 4 | 61 | 0.314 | 7078   | TIMP metalloproteinase inhibitor 3                                     |
| GO | cytoplasmic vesicle membrane            | 4 | 61 | 0.314 | 23138  | Nedd4 binding protein 3                                                |
| GO | cytoplasmic vesicle membrane            | 4 | 61 | 0.314 | 30011  | SH3-domain kinase binding protein 1                                    |
| GO | cytoplasmic vesicle membrane            | 4 | 61 | 0.314 | 55016  | membrane-associated ring finger (C3HC4) 1                              |
| GO | cytoplasmic vesicle membrane            | 4 | 61 | 0.314 | 8905   | adaptor-related protein complex 1, sigma 2 subunit                     |
| GO | cytoskeleton organization               | 4 | 61 | 0.314 | 27445  | piccolo (presynaptic cytomatrix protein)                               |
| GO | cytoskeleton organization               | 4 | 61 | 0.314 | 348    | apolipoprotein E                                                       |
| GO | cytoskeleton organization               | 4 | 61 | 0.314 | 6444   | sarcoglycan, delta (35kDa dystrophin-associated glycoprotein)          |
| GO | cytoskeleton organization               | 4 | 61 | 0.314 | 7168   | tropomyosin 1 (alpha)                                                  |
| GO | response to estradiol stimulus          | 4 | 61 | 0.314 | 5021   | oxytocin receptor                                                      |
| GO | response to estradiol stimulus          | 4 | 61 | 0.314 | 8835   | suppressor of cytokine signaling 2                                     |
| GO | response to estradiol stimulus          | 4 | 61 | 0.314 | 890    | cyclin A2                                                              |
| GO | response to estradiol stimulus          | 4 | 61 | 0.314 | 898    | cyclin E1                                                              |
| GO | catenin complex                         | 1 | 8  | 0.316 | 1000   | cadherin 2, type 1, N-cadherin (neuronal)                              |
| GO | positive regulation of dendrite morphog | 1 | 8  | 0.316 | 10096  | ARP3 actin-related protein 3 homolog (yeast)                           |
| GO | response to carbohydrate stimulus       | 1 | 8  | 0.316 | 10096  | ARP3 actin-related protein 3 homolog (yeast)                           |
| GO | protein K63-linked deubiquitination     | 1 | 8  | 0.316 | 10213  | proteasome (prosome, macropain) 26S subunit, non-ATPase, 14            |

|    |                                           |   |   |       |                                                                                   |
|----|-------------------------------------------|---|---|-------|-----------------------------------------------------------------------------------|
| GO | cyclin binding                            | 1 | 8 | 0.316 | 1026 cyclin-dependent kinase inhibitor 1A (p21, Cip1)                             |
| GO | cyclin-dependent protein kinase holoen    | 1 | 8 | 0.316 | 1026 cyclin-dependent kinase inhibitor 1A (p21, Cip1)                             |
| GO | poly(A) RNA binding                       | 1 | 8 | 0.316 | 10492 synaptotagmin binding, cytoplasmic RNA interacting protein                  |
| GO | negative regulation of neurogenesis       | 1 | 8 | 0.316 | 10683 delta-like 3 (Drosophila)                                                   |
| GO | prepulse inhibition                       | 1 | 8 | 0.316 | 1496 catenin (cadherin-associated protein), alpha 2                               |
| GO | hydrogen peroxide biosynthetic process    | 1 | 8 | 0.316 | 1543 cytochrome P450, family 1, subfamily A, polypeptide 1                        |
| GO | olfactory bulb development                | 1 | 8 | 0.316 | 1746 distal-less homeobox 2                                                       |
| GO | secondary active sulfate transmembran     | 1 | 8 | 0.316 | 1836 solute carrier family 26 (sulfate transporter), member 2                     |
| GO | adenylate kinase activity                 | 1 | 8 | 0.316 | 203 adenylate kinase 1                                                            |
| GO | ephrin receptor binding                   | 1 | 8 | 0.316 | 2045 EPH receptor A7                                                              |
| GO | positive regulation of JAK-STAT cascade   | 1 | 8 | 0.316 | 2149 coagulation factor II (thrombin) receptor                                    |
| GO | positive regulation of leukocyte chemot   | 1 | 8 | 0.316 | 2150 coagulation factor II (thrombin) receptor-like 1                             |
| GO | retinal metabolic process                 | 1 | 8 | 0.316 | 220 aldehyde dehydrogenase 1 family, member A3                                    |
| GO | calcium channel complex                   | 1 | 8 | 0.316 | 2281 FK506 binding protein 1B, 12.6 kDa                                           |
| GO | FK506 binding                             | 1 | 8 | 0.316 | 2281 FK506 binding protein 1B, 12.6 kDa                                           |
| GO | vascular endothelial growth factor recei  | 1 | 8 | 0.316 | 2321 fms-related tyrosine kinase 1 (vascular endothelial growth factor/vascular r |
| GO | protein homotrimerization                 | 1 | 8 | 0.316 | 241 arachidonate 5-lipoxygenase-activating protein                                |
| GO | diacylglycerol binding                    | 1 | 8 | 0.316 | 25780 RAS guanyl releasing protein 3 (calcium and DAG-regulated)                  |
| GO | creatine metabolic process                | 1 | 8 | 0.316 | 2628 glycine amidinotransferase (L-arginine:glycine amidinotransferase)           |
| GO | glycine catabolic process                 | 1 | 8 | 0.316 | 2653 glycine cleavage system protein H (aminomethyl carrier)                      |
| GO | dopamine receptor signaling pathway       | 1 | 8 | 0.316 | 27065 DNA segment on chromosome 4 (unique) 234 expressed sequence                 |
| GO | N-methyl-D-aspartate selective glutama    | 1 | 8 | 0.316 | 2906 glutamate receptor, ionotropic, N-methyl D-aspartate 2D                      |
| GO | positive regulation of G-protein couplec  | 1 | 8 | 0.316 | 29767 tropomodulin 2 (neuronal)                                                   |
| GO | positive regulation of chondrocyte diffe  | 1 | 8 | 0.316 | 3237 homeobox D11                                                                 |
| GO | phosphatidylcholine binding               | 1 | 8 | 0.316 | 341 apolipoprotein C-I                                                            |
| GO | phospholipase inhibitor activity          | 1 | 8 | 0.316 | 341 apolipoprotein C-I                                                            |
| GO | negative regulation of programmed cell    | 1 | 8 | 0.316 | 347902 adhesion molecule with Ig-like domain 2                                    |
| GO | antioxidant activity                      | 1 | 8 | 0.316 | 348 apolipoprotein E                                                              |
| GO | positive regulation of cholesterol efflux | 1 | 8 | 0.316 | 348 apolipoprotein E                                                              |
| GO | protein-DNA complex                       | 1 | 8 | 0.316 | 3516 recombination signal binding protein for immunoglobulin kappa J region       |
| GO | ciliary rootlet                           | 1 | 8 | 0.316 | 3800 kinesin family member 5C                                                     |
| GO | energy reserve metabolic process          | 1 | 8 | 0.316 | 3952 leptin                                                                       |
| GO | response to UV-B                          | 1 | 8 | 0.316 | 4436 mutS homolog 2, colon cancer, nonpolyposis type 1 (E. coli)                  |
| GO | actin-dependent ATPase activity           | 1 | 8 | 0.316 | 4637 myosin, light chain 6, alkali, smooth muscle and non-muscle                  |
| GO | phosphoinositide 3-kinase cascade         | 1 | 8 | 0.316 | 4763 neurofibromin 1                                                              |
| GO | hydrogen-exporting ATPase activity, ph    | 1 | 8 | 0.316 | 528 ATPase, H+ transporting, lysosomal 42kDa, V1 subunit C1                       |

|    |                                             |   |     |       |                                                                                  |
|----|---------------------------------------------|---|-----|-------|----------------------------------------------------------------------------------|
| GO | proton-transporting V-type ATPase, V1       | 1 | 8   | 0.316 | 528 ATPase, H <sup>+</sup> transporting, lysosomal 42kDa, V1 subunit C1          |
| GO | embryonic hemopoiesis                       | 1 | 8   | 0.316 | 5469 mediator complex subunit 1                                                  |
| GO | positive regulation of NF-kappaB import     | 1 | 8   | 0.316 | 5588 protein kinase C, theta                                                     |
| GO | activation of caspase activity by cytochr   | 1 | 8   | 0.316 | 581 BCL2-associated X protein                                                    |
| GO | retinoid binding                            | 1 | 8   | 0.316 | 5947 retinol binding protein 1, cellular                                         |
| GO | heterochromatin                             | 1 | 8   | 0.316 | 6299 sal-like 1 (Drosophila)                                                     |
| GO | regulation of ossification                  | 1 | 8   | 0.316 | 6422 secreted frizzled-related protein 1                                         |
| GO | regulation of sodium ion transport          | 1 | 8   | 0.316 | 6546 solute carrier family 8 (sodium/calcium exchanger), member 1                |
| GO | organic cation transport                    | 1 | 8   | 0.316 | 6580 solute carrier family 22 (organic cation transporter), member 1             |
| GO | negative chemotaxis                         | 1 | 8   | 0.316 | 6586 slit homolog 3 (Drosophila)                                                 |
| GO | transmembrane receptor protein serine       | 1 | 8   | 0.316 | 659 bone morphogenetic protein receptor, type II (serine/threonine kinase)       |
| GO | positive regulation of neuroblast prolife   | 1 | 8   | 0.316 | 6657 SRY (sex determining region Y)-box 2                                        |
| GO | embryonic viscerocranium morphogene         | 1 | 8   | 0.316 | 6899 T-box 1                                                                     |
| GO | positive regulation of SMAD protein nuc     | 1 | 8   | 0.316 | 7046 transforming growth factor, beta receptor 1                                 |
| GO | troponin complex                            | 1 | 8   | 0.316 | 7137 troponin I type 3 (cardiac)                                                 |
| GO | sarcomere organization                      | 1 | 8   | 0.316 | 7168 tropomyosin 1 (alpha)                                                       |
| GO | cytosolic calcium ion homeostasis           | 1 | 8   | 0.316 | 7220 transient receptor potential cation channel, subfamily C, member 1          |
| GO | histone H2B ubiquitination                  | 1 | 8   | 0.316 | 7324 ubiquitin-conjugating enzyme E2E 1 (UBC4/5 homolog, yeast)                  |
| GO | C2H2 zinc finger domain binding             | 1 | 8   | 0.316 | 7490 Wilms tumor 1                                                               |
| GO | mesonephros development                     | 1 | 8   | 0.316 | 7490 Wilms tumor 1                                                               |
| GO | regulation of calcium ion-dependent ex      | 1 | 8   | 0.316 | 773 calcium channel, voltage-dependent, P/Q type, alpha 1A subunit               |
| GO | epithelial cell proliferation               | 1 | 8   | 0.316 | 7840 Alstrom syndrome 1                                                          |
| GO | positive regulation of fat cell differentia | 1 | 8   | 0.316 | 81029 wingless-type MMTV integration site family, member 5B                      |
| GO | L-glutamate transport                       | 1 | 8   | 0.316 | 8604 solute carrier family 25 (mitochondrial carrier, Aralar), member 12         |
| GO | tail morphogenesis                          | 1 | 8   | 0.316 | 8626 tumor protein p63                                                           |
| GO | glycosphingolipid biosynthetic process      | 1 | 8   | 0.316 | 9215 like-glycosyltransferase                                                    |
| GO | clathrin binding                            | 1 | 8   | 0.316 | 92737 delta/notch-like EGF repeat containing                                     |
| GO | HAUS complex                                | 1 | 8   | 0.316 | 93323 HAUS augmin-like complex, subunit 8                                        |
| GO | bile acid biosynthetic process              | 1 | 8   | 0.316 | 9420 cytochrome P450, family 7, subfamily B, polypeptide 1                       |
| GO | induction of apoptosis by oxidative stre    | 1 | 8   | 0.316 | 9540 tumor protein p53 inducible protein 3                                       |
| GO | protein folding                             | 8 | 139 | 0.318 | 10465 peptidylprolyl isomerase H (cyclophilin H)                                 |
| GO | protein folding                             | 8 | 139 | 0.318 | 1047 calmegin                                                                    |
| GO | protein folding                             | 8 | 139 | 0.318 | 3336 heat shock 10kDa protein 1 (chaperonin 10)                                  |
| GO | protein folding                             | 8 | 139 | 0.318 | 51645 peptidylprolyl isomerase (cyclophilin)-like 1                              |
| GO | protein folding                             | 8 | 139 | 0.318 | 5203 prefoldin subunit 4                                                         |
| GO | protein folding                             | 8 | 139 | 0.318 | 5303 protein (peptidylprolyl cis/trans isomerase) NIMA-interacting, 4 (parvulin) |



|    |                            |    |     |       |        |                                                                                             |
|----|----------------------------|----|-----|-------|--------|---------------------------------------------------------------------------------------------|
| GO | protein folding            | 8  | 139 | 0.318 | 81562  | lectin, mannose-binding 2-like                                                              |
| GO | protein folding            | 8  | 139 | 0.318 | 8409   | ubiquitously-expressed transcript                                                           |
| GO | ion transport              | 26 | 505 | 0.322 | 1136   | cholinergic receptor, nicotinic, alpha 3                                                    |
| GO | ion transport              | 26 | 505 | 0.322 | 1138   | cholinergic receptor, nicotinic, alpha 5                                                    |
| GO | ion transport              | 26 | 505 | 0.322 | 200959 | gamma-aminobutyric acid (GABA) receptor, rho 3                                              |
| GO | ion transport              | 26 | 505 | 0.322 | 201780 | solute carrier family 10 (sodium/bile acid cotransporter family), member 4                  |
| GO | ion transport              | 26 | 505 | 0.322 | 2558   | gamma-aminobutyric acid (GABA) A receptor, alpha 5                                          |
| GO | ion transport              | 26 | 505 | 0.322 | 2898   | glutamate receptor, ionotropic, kainate 2                                                   |
| GO | ion transport              | 26 | 505 | 0.322 | 2906   | glutamate receptor, ionotropic, N-methyl D-aspartate 2D                                     |
| GO | ion transport              | 26 | 505 | 0.322 | 348938 | NIPA-like domain containing 4                                                               |
| GO | ion transport              | 26 | 505 | 0.322 | 3751   | potassium voltage-gated channel, Shal-related subfamily, member 2                           |
| GO | ion transport              | 26 | 505 | 0.322 | 3754   | potassium voltage-gated channel, subfamily F, member 1                                      |
| GO | ion transport              | 26 | 505 | 0.322 | 3756   | potassium voltage-gated channel, subfamily H (eag-related), member 1                        |
| GO | ion transport              | 26 | 505 | 0.322 | 3763   | potassium inwardly-rectifying channel, subfamily J, member 6                                |
| GO | ion transport              | 26 | 505 | 0.322 | 3778   | potassium large conductance calcium-activated channel, subfamily M, alpha                   |
| GO | ion transport              | 26 | 505 | 0.322 | 5026   | purinergic receptor P2X, ligand-gated ion channel, 5                                        |
| GO | ion transport              | 26 | 505 | 0.322 | 51382  | ATPase, H <sup>+</sup> transporting, lysosomal 34kDa, V1 subunit D                          |
| GO | ion transport              | 26 | 505 | 0.322 | 516    | ATP synthase, H <sup>+</sup> transporting, mitochondrial F0 complex, subunit C1 (subunit c) |
| GO | ion transport              | 26 | 505 | 0.322 | 528    | ATPase, H <sup>+</sup> transporting, lysosomal 42kDa, V1 subunit C1                         |
| GO | ion transport              | 26 | 505 | 0.322 | 54822  | transient receptor potential cation channel, subfamily M, member 7                          |
| GO | ion transport              | 26 | 505 | 0.322 | 55283  | mucolipin 3                                                                                 |
| GO | ion transport              | 26 | 505 | 0.322 | 56479  | potassium voltage-gated channel, KQT-like subfamily, member 5                               |
| GO | ion transport              | 26 | 505 | 0.322 | 6335   | sodium channel, voltage-gated, type IX, alpha subunit                                       |
| GO | ion transport              | 26 | 505 | 0.322 | 6527   | solute carrier family 5 (low affinity glucose cotransporter), member 4                      |
| GO | ion transport              | 26 | 505 | 0.322 | 6546   | solute carrier family 8 (sodium/calcium exchanger), member 1                                |
| GO | ion transport              | 26 | 505 | 0.322 | 7220   | transient receptor potential cation channel, subfamily C, member 1                          |
| GO | ion transport              | 26 | 505 | 0.322 | 773    | calcium channel, voltage-dependent, P/Q type, alpha 1A subunit                              |
| GO | ion transport              | 26 | 505 | 0.322 | 9635   | chloride channel accessory 2                                                                |
| GO | Notch signaling pathway    | 3  | 43  | 0.322 | 182    | jagged 1 (Alagille syndrome)                                                                |
| GO | Notch signaling pathway    | 3  | 43  | 0.322 | 3516   | recombination signal binding protein for immunoglobulin kappa J region                      |
| GO | Notch signaling pathway    | 3  | 43  | 0.322 | 55759  | WD repeat domain 12                                                                         |
| GO | glucose metabolic process  | 3  | 43  | 0.322 | 283209 | phosphoglucosyltransferase 2-like 1                                                         |
| GO | glucose metabolic process  | 3  | 43  | 0.322 | 3952   | leptin                                                                                      |
| GO | glucose metabolic process  | 3  | 43  | 0.322 | 773    | calcium channel, voltage-dependent, P/Q type, alpha 1A subunit                              |
| GO | protein polyubiquitination | 2  | 25  | 0.325 | 1161   | excision repair cross-complementing rodent repair deficiency, complement                    |
| GO | protein polyubiquitination | 2  | 25  | 0.325 | 1643   | damage-specific DNA binding protein 2, 48kDa                                                |

|    |                                          |    |     |       |        |                                                                            |
|----|------------------------------------------|----|-----|-------|--------|----------------------------------------------------------------------------|
| GO | spindle microtubule                      | 2  | 25  | 0.325 | 220134 | spindle and kinetochore associated complex subunit 1                       |
| GO | spindle microtubule                      | 2  | 25  | 0.325 | 332    | baculoviral IAP repeat-containing 5                                        |
| GO | glycoprotein binding                     | 2  | 25  | 0.325 | 2534   | FYN oncogene related to SRC, FGR, YES                                      |
| GO | glycoprotein binding                     | 2  | 25  | 0.325 | 3932   | lymphocyte-specific protein tyrosine kinase                                |
| GO | filopodium                               | 2  | 25  | 0.325 | 26230  | T-cell lymphoma invasion and metastasis 2                                  |
| GO | filopodium                               | 2  | 25  | 0.325 | 5420   | podocalyxin-like                                                           |
| GO | mitochondrial intermembrane space        | 2  | 25  | 0.325 | 2628   | glycine amidinotransferase (L-arginine:glycine amidinotransferase)         |
| GO | mitochondrial intermembrane space        | 2  | 25  | 0.325 | 27429  | HtrA serine peptidase 2                                                    |
| GO | protein targeting to mitochondrion       | 2  | 25  | 0.325 | 26519  | translocase of inner mitochondrial membrane 10 homolog (yeast)             |
| GO | protein targeting to mitochondrion       | 2  | 25  | 0.325 | 26521  | translocase of inner mitochondrial membrane 8 homolog B (yeast)            |
| GO | thyroid hormone receptor binding         | 2  | 25  | 0.325 | 29893  | PSMC3 interacting protein                                                  |
| GO | thyroid hormone receptor binding         | 2  | 25  | 0.325 | 5469   | mediator complex subunit 1                                                 |
| GO | skeletal system morphogenesis            | 2  | 25  | 0.325 | 3224   | homeobox C8                                                                |
| GO | skeletal system morphogenesis            | 2  | 25  | 0.325 | 7046   | transforming growth factor, beta receptor 1                                |
| GO | spliceosomal snRNP assembly              | 2  | 25  | 0.325 | 6637   | small nuclear ribonucleoprotein polypeptide G                              |
| GO | spliceosomal snRNP assembly              | 2  | 25  | 0.325 | 79833  | gem (nuclear organelle) associated protein 6                               |
| GO | negative regulation of ubiquitin-protein | 4  | 62  | 0.325 | 10213  | proteasome (prosome, macropain) 26S subunit, non-ATPase, 14                |
| GO | negative regulation of ubiquitin-protein | 4  | 62  | 0.325 | 5702   | proteasome (prosome, macropain) 26S subunit, ATPase, 3                     |
| GO | negative regulation of ubiquitin-protein | 4  | 62  | 0.325 | 5717   | proteasome (prosome, macropain) 26S subunit, non-ATPase, 11                |
| GO | negative regulation of ubiquitin-protein | 4  | 62  | 0.325 | 7324   | ubiquitin-conjugating enzyme E2E 1 (UBC4/5 homolog, yeast)                 |
| GO | integrin binding                         | 4  | 62  | 0.325 | 10457  | glycoprotein (transmembrane) nmb                                           |
| GO | integrin binding                         | 4  | 62  | 0.325 | 1289   | collagen, type V, alpha 1                                                  |
| GO | integrin binding                         | 4  | 62  | 0.325 | 3694   | integrin, beta 6                                                           |
| GO | integrin binding                         | 4  | 62  | 0.325 | 667    | dystonin                                                                   |
| GO | positive regulation of cell migration    | 4  | 62  | 0.325 | 2149   | coagulation factor II (thrombin) receptor                                  |
| GO | positive regulation of cell migration    | 4  | 62  | 0.325 | 2321   | fms-related tyrosine kinase 1 (vascular endothelial growth factor/vascular |
| GO | positive regulation of cell migration    | 4  | 62  | 0.325 | 5420   | podocalyxin-like                                                           |
| GO | positive regulation of cell migration    | 4  | 62  | 0.325 | 81029  | wingless-type MMTV integration site family, member 5B                      |
| GO | protein complex assembly                 | 6  | 101 | 0.328 | 10465  | peptidylprolyl isomerase H (cyclophilin H)                                 |
| GO | protein complex assembly                 | 6  | 101 | 0.328 | 23562  | claudin 14                                                                 |
| GO | protein complex assembly                 | 6  | 101 | 0.328 | 355    | Fas (TNF receptor superfamily, member 6)                                   |
| GO | protein complex assembly                 | 6  | 101 | 0.328 | 56479  | potassium voltage-gated channel, KQT-like subfamily, member 5              |
| GO | protein complex assembly                 | 6  | 101 | 0.328 | 7456   | WAS/WASL interacting protein family, member 1                              |
| GO | protein complex assembly                 | 6  | 101 | 0.328 | 84365  | MKI67 (FHA domain) interacting nucleolar phosphoprotein                    |
| GO | cellular_component                       | 27 | 528 | 0.33  | 10190  | thioredoxin domain containing 9                                            |
| GO | cellular_component                       | 27 | 528 | 0.33  | 10761  | placenta-specific 1                                                        |

|    |                    |    |     |       |        |                                                                              |
|----|--------------------|----|-----|-------|--------|------------------------------------------------------------------------------|
| GO | cellular_component | 27 | 528 | 0.33  | 10777  | cyclic AMP-regulated phosphoprotein, 21 kD                                   |
| GO | cellular_component | 27 | 528 | 0.33  | 10962  | myeloid/lymphoid or mixed-lineage leukemia (trithorax homolog, Drosophi      |
| GO | cellular_component | 27 | 528 | 0.33  | 11227  | UDP-N-acetyl-alpha-D-galactosamine:polypeptide N-acetylgalactosaminyltr      |
| GO | cellular_component | 27 | 528 | 0.33  | 132851 | spermatogenesis associated 4                                                 |
| GO | cellular_component | 27 | 528 | 0.33  | 1503   | CTP synthase                                                                 |
| GO | cellular_component | 27 | 528 | 0.33  | 200959 | gamma-aminobutyric acid (GABA) receptor, rho 3                               |
| GO | cellular_component | 27 | 528 | 0.33  | 2273   | four and a half LIM domains 1                                                |
| GO | cellular_component | 27 | 528 | 0.33  | 23157  | septin 6                                                                     |
| GO | cellular_component | 27 | 528 | 0.33  | 29893  | PSMC3 interacting protein                                                    |
| GO | cellular_component | 27 | 528 | 0.33  | 29995  | LIM and cysteine-rich domains 1                                              |
| GO | cellular_component | 27 | 528 | 0.33  | 50940  | phosphodiesterase 11A                                                        |
| GO | cellular_component | 27 | 528 | 0.33  | 51050  | peptidase inhibitor 15                                                       |
| GO | cellular_component | 27 | 528 | 0.33  | 54726  | OTU domain containing 4                                                      |
| GO | cellular_component | 27 | 528 | 0.33  | 54733  | solute carrier family 35, member F2                                          |
| GO | cellular_component | 27 | 528 | 0.33  | 5494   | protein phosphatase, Mg2+/Mn2+ dependent, 1A                                 |
| GO | cellular_component | 27 | 528 | 0.33  | 56651  | chromosome 18 open reading frame 2                                           |
| GO | cellular_component | 27 | 528 | 0.33  | 5833   | phosphate cytidyltransferase 2, ethanolamine                                 |
| GO | cellular_component | 27 | 528 | 0.33  | 6000   | regulator of G-protein signaling 7                                           |
| GO | cellular_component | 27 | 528 | 0.33  | 6242   | rhotekin                                                                     |
| GO | cellular_component | 27 | 528 | 0.33  | 66000  | transmembrane protein 108                                                    |
| GO | cellular_component | 27 | 528 | 0.33  | 666    | BCL2-related ovarian killer                                                  |
| GO | cellular_component | 27 | 528 | 0.33  | 6785   | elongation of very long chain fatty acids (FEN1/Elo2, SUR4/Elo3, yeast)-like |
| GO | cellular_component | 27 | 528 | 0.33  | 84668  | family with sequence similarity 126, member A                                |
| GO | cellular_component | 27 | 528 | 0.33  | 9448   | mitogen-activated protein kinase kinase kinase 4                             |
| GO | cellular_component | 27 | 528 | 0.33  | 9540   | tumor protein p53 inducible protein 3                                        |
| GO | ligase activity    | 16 | 303 | 0.335 | 10055  | SUMO1 activating enzyme subunit 1                                            |
| GO | ligase activity    | 16 | 303 | 0.335 | 10056  | phenylalanyl-tRNA synthetase, beta subunit                                   |
| GO | ligase activity    | 16 | 303 | 0.335 | 130507 | ubiquitin protein ligase E3 component n-recogin 3 (putative)                 |
| GO | ligase activity    | 16 | 303 | 0.335 | 140739 | ubiquitin-conjugating enzyme E2F (putative)                                  |
| GO | ligase activity    | 16 | 303 | 0.335 | 1503   | CTP synthase                                                                 |
| GO | ligase activity    | 16 | 303 | 0.335 | 23305  | acyl-CoA synthetase long-chain family member 6                               |
| GO | ligase activity    | 16 | 303 | 0.335 | 2618   | phosphoribosylglycinamide formyltransferase, phosphoribosylglycinamide       |
| GO | ligase activity    | 16 | 303 | 0.335 | 29128  | ubiquitin-like with PHD and ring finger domains 1                            |
| GO | ligase activity    | 16 | 303 | 0.335 | 4734   | neural precursor cell expressed, developmentally down-regulated 4            |
| GO | ligase activity    | 16 | 303 | 0.335 | 51191  | hect domain and RLD 5                                                        |
| GO | ligase activity    | 16 | 303 | 0.335 | 55016  | membrane-associated ring finger (C3HC4) 1                                    |

|    |                                           |    |     |       |                                                                                 |
|----|-------------------------------------------|----|-----|-------|---------------------------------------------------------------------------------|
| GO | ligase activity                           | 16 | 303 | 0.335 | 55521 tripartite motif-containing 36                                            |
| GO | ligase activity                           | 16 | 303 | 0.335 | 56852 RAD18 homolog ( <i>S. cerevisiae</i> )                                    |
| GO | ligase activity                           | 16 | 303 | 0.335 | 57574 membrane-associated ring finger (C3HC4) 4                                 |
| GO | ligase activity                           | 16 | 303 | 0.335 | 672 breast cancer 1, early onset                                                |
| GO | ligase activity                           | 16 | 303 | 0.335 | 7324 ubiquitin-conjugating enzyme E2E 1 (UBC4/5 homolog, yeast)                 |
| GO | protein binding, bridging                 | 3  | 44  | 0.335 | 1301 collagen, type XI, alpha 1                                                 |
| GO | protein binding, bridging                 | 3  | 44  | 0.335 | 23768 fibronectin leucine rich transmembrane protein 2                          |
| GO | protein binding, bridging                 | 3  | 44  | 0.335 | 55803 ArfGAP with dual PH domains 2                                             |
| GO | Rab GTPase activator activity             | 3  | 44  | 0.335 | 51256 TBC1 domain family, member 7                                              |
| GO | Rab GTPase activator activity             | 3  | 44  | 0.335 | 9882 TBC1 domain family, member 4                                               |
| GO | Rab GTPase activator activity             | 3  | 44  | 0.335 | 9910 RAB GTPase activating protein 1-like                                       |
| GO | regulation of Rab GTPase activity         | 3  | 44  | 0.335 | 51256 TBC1 domain family, member 7                                              |
| GO | regulation of Rab GTPase activity         | 3  | 44  | 0.335 | 9882 TBC1 domain family, member 4                                               |
| GO | regulation of Rab GTPase activity         | 3  | 44  | 0.335 | 9910 RAB GTPase activating protein 1-like                                       |
| GO | anaphase-promoting complex-depende        | 4  | 63  | 0.336 | 10213 proteasome (prosome, macropain) 26S subunit, non-ATPase, 14               |
| GO | anaphase-promoting complex-depende        | 4  | 63  | 0.336 | 5702 proteasome (prosome, macropain) 26S subunit, ATPase, 3                     |
| GO | anaphase-promoting complex-depende        | 4  | 63  | 0.336 | 5717 proteasome (prosome, macropain) 26S subunit, non-ATPase, 11                |
| GO | anaphase-promoting complex-depende        | 4  | 63  | 0.336 | 7324 ubiquitin-conjugating enzyme E2E 1 (UBC4/5 homolog, yeast)                 |
| GO | voltage-gated potassium channel activit   | 4  | 63  | 0.336 | 283518 potassium channel regulator                                              |
| GO | voltage-gated potassium channel activit   | 4  | 63  | 0.336 | 3751 potassium voltage-gated channel, Shal-related subfamily, member 2          |
| GO | voltage-gated potassium channel activit   | 4  | 63  | 0.336 | 3754 potassium voltage-gated channel, subfamily F, member 1                     |
| GO | voltage-gated potassium channel activit   | 4  | 63  | 0.336 | 3778 potassium large conductance calcium-activated channel, subfamily M, alph   |
| GO | metalloendopeptidase activity             | 6  | 102 | 0.337 | 10893 matrix metallopeptidase 24 (membrane-inserted)                            |
| GO | metalloendopeptidase activity             | 6  | 102 | 0.337 | 4312 matrix metallopeptidase 1 (interstitial collagenase)                       |
| GO | metalloendopeptidase activity             | 6  | 102 | 0.337 | 4318 matrix metallopeptidase 9 (gelatinase B, 92kDa gelatinase, 92kDa type IV c |
| GO | metalloendopeptidase activity             | 6  | 102 | 0.337 | 4319 matrix metallopeptidase 10 (stromelysin 2)                                 |
| GO | metalloendopeptidase activity             | 6  | 102 | 0.337 | 8728 ADAM metallopeptidase domain 19 (meltrin beta)                             |
| GO | metalloendopeptidase activity             | 6  | 102 | 0.337 | 8747 ADAM metallopeptidase domain 21                                            |
| GO | positive regulation of transcription, DN/ | 7  | 122 | 0.339 | 2149 coagulation factor II (thrombin) receptor                                  |
| GO | positive regulation of transcription, DN/ | 7  | 122 | 0.339 | 5494 protein phosphatase, Mg <sup>2+</sup> /Mn <sup>2+</sup> dependent, 1A      |
| GO | positive regulation of transcription, DN/ | 7  | 122 | 0.339 | 6659 SRY (sex determining region Y)-box 4                                       |
| GO | positive regulation of transcription, DN/ | 7  | 122 | 0.339 | 6672 SP100 nuclear antigen                                                      |
| GO | positive regulation of transcription, DN/ | 7  | 122 | 0.339 | 672 breast cancer 1, early onset                                                |
| GO | positive regulation of transcription, DN/ | 7  | 122 | 0.339 | 8626 tumor protein p63                                                          |
| GO | positive regulation of transcription, DN/ | 7  | 122 | 0.339 | 898 cyclin E1                                                                   |
| GO | integral to plasma membrane               | 48 | 969 | 0.341 | 1002 cadherin 4, type 1, R-cadherin (retinal)                                   |

|    |                             |    |     |       |                                                                                   |
|----|-----------------------------|----|-----|-------|-----------------------------------------------------------------------------------|
| GO | integral to plasma membrane | 48 | 969 | 0.341 | 10457 glycoprotein (transmembrane) nmb                                            |
| GO | integral to plasma membrane | 48 | 969 | 0.341 | 10893 matrix metalloproteinase 24 (membrane-inserted)                             |
| GO | integral to plasma membrane | 48 | 969 | 0.341 | 132724 transmembrane protease, serine 11B                                         |
| GO | integral to plasma membrane | 48 | 969 | 0.341 | 182 jagged 1 (Alagille syndrome)                                                  |
| GO | integral to plasma membrane | 48 | 969 | 0.341 | 1836 solute carrier family 26 (sulfate transporter), member 2                     |
| GO | integral to plasma membrane | 48 | 969 | 0.341 | 2045 EPH receptor A7                                                              |
| GO | integral to plasma membrane | 48 | 969 | 0.341 | 2149 coagulation factor II (thrombin) receptor                                    |
| GO | integral to plasma membrane | 48 | 969 | 0.341 | 2150 coagulation factor II (thrombin) receptor-like 1                             |
| GO | integral to plasma membrane | 48 | 969 | 0.341 | 2151 coagulation factor II (thrombin) receptor-like 2                             |
| GO | integral to plasma membrane | 48 | 969 | 0.341 | 2264 fibroblast growth factor receptor 4                                          |
| GO | integral to plasma membrane | 48 | 969 | 0.341 | 2321 fms-related tyrosine kinase 1 (vascular endothelial growth factor/vascular p |
| GO | integral to plasma membrane | 48 | 969 | 0.341 | 23768 fibronectin leucine rich transmembrane protein 2                            |
| GO | integral to plasma membrane | 48 | 969 | 0.341 | 2558 gamma-aminobutyric acid (GABA) A receptor, alpha 5                           |
| GO | integral to plasma membrane | 48 | 969 | 0.341 | 25780 RAS guanyl releasing protein 3 (calcium and DAG-regulated)                  |
| GO | integral to plasma membrane | 48 | 969 | 0.341 | 2842 G protein-coupled receptor 19                                                |
| GO | integral to plasma membrane | 48 | 969 | 0.341 | 2845 G protein-coupled receptor 22                                                |
| GO | integral to plasma membrane | 48 | 969 | 0.341 | 2863 G protein-coupled receptor 39                                                |
| GO | integral to plasma membrane | 48 | 969 | 0.341 | 2898 glutamate receptor, ionotropic, kainate 2                                    |
| GO | integral to plasma membrane | 48 | 969 | 0.341 | 3037 hyaluronan synthase 2                                                        |
| GO | integral to plasma membrane | 48 | 969 | 0.341 | 3685 integrin, alpha V (vitronectin receptor, alpha polypeptide, antigen CD51)    |
| GO | integral to plasma membrane | 48 | 969 | 0.341 | 4158 melanocortin 2 receptor (adrenocorticotrophic hormone)                       |
| GO | integral to plasma membrane | 48 | 969 | 0.341 | 4897 neuronal cell adhesion molecule                                              |
| GO | integral to plasma membrane | 48 | 969 | 0.341 | 5021 oxytocin receptor                                                            |
| GO | integral to plasma membrane | 48 | 969 | 0.341 | 5026 purinergic receptor P2X, ligand-gated ion channel, 5                         |
| GO | integral to plasma membrane | 48 | 969 | 0.341 | 5028 purinergic receptor P2Y, G-protein coupled, 1                                |
| GO | integral to plasma membrane | 48 | 969 | 0.341 | 5031 pyrimidinergic receptor P2Y, G-protein coupled, 6                            |
| GO | integral to plasma membrane | 48 | 969 | 0.341 | 5245 prohibitin                                                                   |
| GO | integral to plasma membrane | 48 | 969 | 0.341 | 5420 podocalyxin-like                                                             |
| GO | integral to plasma membrane | 48 | 969 | 0.341 | 55117 solute carrier family 6 (neutral amino acid transporter), member 15         |
| GO | integral to plasma membrane | 48 | 969 | 0.341 | 558 AXL receptor tyrosine kinase                                                  |
| GO | integral to plasma membrane | 48 | 969 | 0.341 | 56133 protocadherin beta 2                                                        |
| GO | integral to plasma membrane | 48 | 969 | 0.341 | 5754 PTK7 protein tyrosine kinase 7                                               |
| GO | integral to plasma membrane | 48 | 969 | 0.341 | 5795 protein tyrosine phosphatase, receptor type, J                               |
| GO | integral to plasma membrane | 48 | 969 | 0.341 | 6546 solute carrier family 8 (sodium/calcium exchanger), member 1                 |
| GO | integral to plasma membrane | 48 | 969 | 0.341 | 6580 solute carrier family 22 (organic cation transporter), member 1              |
| GO | integral to plasma membrane | 48 | 969 | 0.341 | 659 bone morphogenetic protein receptor, type II (serine/threonine kinase)        |

|    |                             |    |     |       |        |                                                                           |
|----|-----------------------------|----|-----|-------|--------|---------------------------------------------------------------------------|
| GO | integral to plasma membrane | 48 | 969 | 0.341 | 7010   | TEK tyrosine kinase, endothelial                                          |
| GO | integral to plasma membrane | 48 | 969 | 0.341 | 7037   | transferrin receptor (p90, CD71)                                          |
| GO | integral to plasma membrane | 48 | 969 | 0.341 | 7113   | transmembrane protease, serine 2                                          |
| GO | integral to plasma membrane | 48 | 969 | 0.341 | 7220   | transient receptor potential cation channel, subfamily C, member 1        |
| GO | integral to plasma membrane | 48 | 969 | 0.341 | 729230 | chemokine (C-C motif) receptor 2                                          |
| GO | integral to plasma membrane | 48 | 969 | 0.341 | 8685   | macrophage receptor with collagenous structure                            |
| GO | integral to plasma membrane | 48 | 969 | 0.341 | 9076   | claudin 1                                                                 |
| GO | integral to plasma membrane | 48 | 969 | 0.341 | 9482   | syntaxin 8                                                                |
| GO | integral to plasma membrane | 48 | 969 | 0.341 | 953    | ectonucleoside triphosphate diphosphohydrolase 1                          |
| GO | integral to plasma membrane | 48 | 969 | 0.341 | 9568   | gamma-aminobutyric acid (GABA) B receptor, 2                              |
| GO | integral to plasma membrane | 48 | 969 | 0.341 | 9635   | chloride channel accessory 2                                              |
| GO | skin development            | 2  | 26  | 0.342 | 1289   | collagen, type V, alpha 1                                                 |
| GO | skin development            | 2  | 26  | 0.342 | 1290   | collagen, type V, alpha 2                                                 |
| GO | terminal button             | 2  | 26  | 0.342 | 2898   | glutamate receptor, ionotropic, kainate 2                                 |
| GO | terminal button             | 2  | 26  | 0.342 | 3778   | potassium large conductance calcium-activated channel, subfamily M, alpha |
| GO | unfolded protein binding    | 6  | 103 | 0.345 | 1047   | calmegin                                                                  |
| GO | unfolded protein binding    | 6  | 103 | 0.345 | 135295 | splicing factor, arginine/serine-rich 13B                                 |
| GO | unfolded protein binding    | 6  | 103 | 0.345 | 27429  | HtrA serine peptidase 2                                                   |
| GO | unfolded protein binding    | 6  | 103 | 0.345 | 3336   | heat shock 10kDa protein 1 (chaperonin 10)                                |
| GO | unfolded protein binding    | 6  | 103 | 0.345 | 5203   | prefoldin subunit 4                                                       |
| GO | unfolded protein binding    | 6  | 103 | 0.345 | 8409   | ubiquitously-expressed transcript                                         |
| GO | membrane raft               | 6  | 103 | 0.345 | 146760 | reticulon 4 receptor-like 1                                               |
| GO | membrane raft               | 6  | 103 | 0.345 | 3932   | lymphocyte-specific protein tyrosine kinase                               |
| GO | membrane raft               | 6  | 103 | 0.345 | 5420   | podocalyxin-like                                                          |
| GO | membrane raft               | 6  | 103 | 0.345 | 6442   | sarcoglycan, alpha (50kDa dystrophin-associated glycoprotein)             |
| GO | membrane raft               | 6  | 103 | 0.345 | 7010   | TEK tyrosine kinase, endothelial                                          |
| GO | membrane raft               | 6  | 103 | 0.345 | 7220   | transient receptor potential cation channel, subfamily C, member 1        |
| GO | endocytosis                 | 6  | 103 | 0.345 | 30011  | SH3-domain kinase binding protein 1                                       |
| GO | endocytosis                 | 6  | 103 | 0.345 | 4830   | non-metastatic cells 1, protein (NM23A) expressed in                      |
| GO | endocytosis                 | 6  | 103 | 0.345 | 4893   | neuroblastoma RAS viral (v-ras) oncogene homolog                          |
| GO | endocytosis                 | 6  | 103 | 0.345 | 7037   | transferrin receptor (p90, CD71)                                          |
| GO | endocytosis                 | 6  | 103 | 0.345 | 8905   | adaptor-related protein complex 1, sigma 2 subunit                        |
| GO | endocytosis                 | 6  | 103 | 0.345 | 92737  | delta/notch-like EGF repeat containing                                    |
| GO | cell death                  | 7  | 123 | 0.346 | 27429  | HtrA serine peptidase 2                                                   |
| GO | cell death                  | 7  | 123 | 0.346 | 4287   | ataxin 3                                                                  |
| GO | cell death                  | 7  | 123 | 0.346 | 51062  | atlastin GTPase 1                                                         |

|    |                                            |   |     |       |        |                                                                               |
|----|--------------------------------------------|---|-----|-------|--------|-------------------------------------------------------------------------------|
| GO | cell death                                 | 7 | 123 | 0.346 | 65055  | receptor accessory protein 1                                                  |
| GO | cell death                                 | 7 | 123 | 0.346 | 6683   | spastin                                                                       |
| GO | cell death                                 | 7 | 123 | 0.346 | 773    | calcium channel, voltage-dependent, P/Q type, alpha 1A subunit                |
| GO | cell death                                 | 7 | 123 | 0.346 | 9420   | cytochrome P450, family 7, subfamily B, polypeptide 1                         |
| GO | motor activity                             | 4 | 64  | 0.346 | 3797   | kinesin family member 3C                                                      |
| GO | motor activity                             | 4 | 64  | 0.346 | 4430   | myosin IB                                                                     |
| GO | motor activity                             | 4 | 64  | 0.346 | 4637   | myosin, light chain 6, alkali, smooth muscle and non-muscle                   |
| GO | motor activity                             | 4 | 64  | 0.346 | 4651   | myosin X                                                                      |
| GO | glucose homeostasis                        | 3 | 45  | 0.348 | 5054   | serpin peptidase inhibitor, clade E (nexin, plasminogen activator inhibitor t |
| GO | glucose homeostasis                        | 3 | 45  | 0.348 | 5140   | phosphodiesterase 3B, cGMP-inhibited                                          |
| GO | glucose homeostasis                        | 3 | 45  | 0.348 | 7840   | Alstrom syndrome 1                                                            |
| GO | blood vessel morphogenesis                 | 1 | 9   | 0.348 | 1000   | cadherin 2, type 1, N-cadherin (neuronal)                                     |
| GO | fascia adherens                            | 1 | 9   | 0.348 | 1000   | cadherin 2, type 1, N-cadherin (neuronal)                                     |
| GO | myeloid dendritic cell differentiation     | 1 | 9   | 0.348 | 10202  | dehydrogenase/reductase (SDR family) member 2                                 |
| GO | phospholipase binding                      | 1 | 9   | 0.348 | 10395  | deleted in liver cancer 1                                                     |
| GO | vinculin binding                           | 1 | 9   | 0.348 | 10395  | deleted in liver cancer 1                                                     |
| GO | ribonuclease P activity                    | 1 | 9   | 0.348 | 10799  | ribonuclease P/MRP 40kDa subunit                                              |
| GO | regulation of alternative nuclear mRNA     | 1 | 9   | 0.348 | 135295 | splicing factor, arginine/serine-rich 13B                                     |
| GO | response to food                           | 1 | 9   | 0.348 | 1543   | cytochrome P450, family 1, subfamily A, polypeptide 1                         |
| GO | outer kinetochore of condensed chromo      | 1 | 9   | 0.348 | 220134 | spindle and kinetochore associated complex subunit 1                          |
| GO | UV protection                              | 1 | 9   | 0.348 | 2237   | flap structure-specific endonuclease 1                                        |
| GO | ubiquinone biosynthetic process            | 1 | 9   | 0.348 | 23590  | prenyl (decaprenyl) diphosphate synthase, subunit 1                           |
| GO | associative learning                       | 1 | 9   | 0.348 | 2558   | gamma-aminobutyric acid (GABA) A receptor, alpha 5                            |
| GO | dendrite cytoplasm                         | 1 | 9   | 0.348 | 2898   | glutamate receptor, ionotropic, kainate 2                                     |
| GO | holo TFIID complex                         | 1 | 9   | 0.348 | 2965   | general transcription factor IID, polypeptide 1, 62kDa                        |
| GO | prostaglandin metabolic process            | 1 | 9   | 0.348 | 3248   | hydroxyprostaglandin dehydrogenase 15-(NAD)                                   |
| GO | negative regulation of blood vessel endo   | 1 | 9   | 0.348 | 348    | apolipoprotein E                                                              |
| GO | positive regulation of membrane protei     | 1 | 9   | 0.348 | 348    | apolipoprotein E                                                              |
| GO | positive regulation of nitric-oxide syntha | 1 | 9   | 0.348 | 348    | apolipoprotein E                                                              |
| GO | regulation of gene-specific transcription  | 1 | 9   | 0.348 | 3624   | inhibin, beta A                                                               |
| GO | two-component signal transduction syst     | 1 | 9   | 0.348 | 3756   | potassium voltage-gated channel, subfamily H (eag-related), member 1          |
| GO | organelle organization                     | 1 | 9   | 0.348 | 3800   | kinesin family member 5C                                                      |
| GO | adult feeding behavior                     | 1 | 9   | 0.348 | 3952   | leptin                                                                        |
| GO | ovulation from ovarian follicle            | 1 | 9   | 0.348 | 3952   | leptin                                                                        |
| GO | anterior/posterior axis specification      | 1 | 9   | 0.348 | 3975   | LIM homeobox 1                                                                |
| GO | Hsp90 protein binding                      | 1 | 9   | 0.348 | 406    | aryl hydrocarbon receptor nuclear translocator-like                           |

|    |                                                            |   |    |       |                                                                                             |
|----|------------------------------------------------------------|---|----|-------|---------------------------------------------------------------------------------------------|
| GO | regulation of protein catabolic process                    | 1 | 9  | 0.348 | 406 aryl hydrocarbon receptor nuclear translocator-like                                     |
| GO | synaptonemal complex                                       | 1 | 9  | 0.348 | 4292 mutL homolog 1, colon cancer, nonpolyposis type 2 (E. coli)                            |
| GO | macrophage differentiation                                 | 1 | 9  | 0.348 | 4318 matrix metalloproteinase 9 (gelatinase B, 92kDa gelatinase, 92kDa type IV collagenase) |
| GO | axonal fasciculation                                       | 1 | 9  | 0.348 | 4897 neuronal cell adhesion molecule                                                        |
| GO | Nup107-160 complex                                         | 1 | 9  | 0.348 | 4928 nucleoporin 98kDa                                                                      |
| GO | sleep                                                      | 1 | 9  | 0.348 | 5021 oxytocin receptor                                                                      |
| GO | telencephalon development                                  | 1 | 9  | 0.348 | 5021 oxytocin receptor                                                                      |
| GO | positive regulation of receptor-mediated signaling pathway | 1 | 9  | 0.348 | 5054 serpin peptidase inhibitor, clade E (nexin, plasminogen activator inhibitor type 1)    |
| GO | vacuolar proton-transporting V-type ATPase activity        | 1 | 9  | 0.348 | 51382 ATPase, H <sup>+</sup> transporting, lysosomal 34kDa, V1 subunit D                    |
| GO | phosphoinositide metabolic process                         | 1 | 9  | 0.348 | 5341 pleckstrin                                                                             |
| GO | respiratory burst                                          | 1 | 9  | 0.348 | 5588 protein kinase C, theta                                                                |
| GO | triglyceride biosynthetic process                          | 1 | 9  | 0.348 | 57678 glycerol-3-phosphate acyltransferase, mitochondrial                                   |
| GO | male meiosis I                                             | 1 | 9  | 0.348 | 5889 RAD51 homolog C ( <i>S. cerevisiae</i> )                                               |
| GO | gonad development                                          | 1 | 9  | 0.348 | 6299 sal-like 1 ( <i>Drosophila</i> )                                                       |
| GO | proteoglycan biosynthetic process                          | 1 | 9  | 0.348 | 64131 xylosyltransferase I                                                                  |
| GO | sodium:hydrogen antiporter activity                        | 1 | 9  | 0.348 | 6549 solute carrier family 9 (sodium/hydrogen exchanger), member 2                          |
| GO | embryonic organ development                                | 1 | 9  | 0.348 | 6657 SRY (sex determining region Y)-box 2                                                   |
| GO | epithelial tube branching involved in lung morphogenesis   | 1 | 9  | 0.348 | 6657 SRY (sex determining region Y)-box 2                                                   |
| GO | cellular response to reactive oxygen species               | 1 | 9  | 0.348 | 7168 tropomyosin 1 (alpha)                                                                  |
| GO | positive regulation of ATPase activity                     | 1 | 9  | 0.348 | 7168 tropomyosin 1 (alpha)                                                                  |
| GO | positive regulation of release of sequestered calcium ion  | 1 | 9  | 0.348 | 7220 transient receptor potential cation channel, subfamily C, member 1                     |
| GO | histone monoubiquitination                                 | 1 | 9  | 0.348 | 7324 ubiquitin-conjugating enzyme E2E 1 (UBC4/5 homolog, yeast)                             |
| GO | actin polymerization or depolymerization                   | 1 | 9  | 0.348 | 7456 WAS/WASL interacting protein family, member 1                                          |
| GO | oligosaccharide metabolic process                          | 1 | 9  | 0.348 | 84620 ST6 beta-galactosamide alpha-2,6-sialyltransferase 2                                  |
| GO | clathrin coat of trans-Golgi network vesicle               | 1 | 9  | 0.348 | 8905 adaptor-related protein complex 1, sigma 2 subunit                                     |
| GO | skeletal muscle fiber development                          | 1 | 9  | 0.348 | 92737 delta/notch-like EGF repeat containing                                                |
| GO | quinone binding                                            | 1 | 9  | 0.348 | 9540 tumor protein p53 inducible protein 3                                                  |
| GO | positive regulation of JUN kinase activity                 | 1 | 9  | 0.348 | 9839 zinc finger E-box binding homeobox 2                                                   |
| GO | melanosome                                                 | 5 | 84 | 0.351 | 10457 glycoprotein (transmembrane) nmb                                                      |
| GO | melanosome                                                 | 5 | 84 | 0.351 | 10672 guanine nucleotide binding protein (G protein), alpha 13                              |
| GO | melanosome                                                 | 5 | 84 | 0.351 | 309 annexin A6                                                                              |
| GO | melanosome                                                 | 5 | 84 | 0.351 | 54843 synaptotagmin-like 2                                                                  |
| GO | melanosome                                                 | 5 | 84 | 0.351 | 7037 transferrin receptor (p90, CD71)                                                       |
| GO | positive regulation of ubiquitin-protein linkage formation | 4 | 65 | 0.357 | 10213 proteasome (prosome, macropain) 26S subunit, non-ATPase, 14S                          |
| GO | positive regulation of ubiquitin-protein linkage formation | 4 | 65 | 0.357 | 5702 proteasome (prosome, macropain) 26S subunit, ATPase, 3S                                |
| GO | positive regulation of ubiquitin-protein linkage formation | 4 | 65 | 0.357 | 5717 proteasome (prosome, macropain) 26S subunit, non-ATPase, 11S                           |



|    |                                            |    |      |       |                                                                                    |
|----|--------------------------------------------|----|------|-------|------------------------------------------------------------------------------------|
| GO | positive regulation of ubiquitin-protein   | 4  | 65   | 0.357 | 7324 ubiquitin-conjugating enzyme E2E 1 (UBC4/5 homolog, yeast)                    |
| GO | positive regulation of fibroblast prolifer | 2  | 27   | 0.359 | 1026 cyclin-dependent kinase inhibitor 1A (p21, Cip1)                              |
| GO | positive regulation of fibroblast prolifer | 2  | 27   | 0.359 | 890 cyclin A2                                                                      |
| GO | SH2 domain binding                         | 2  | 27   | 0.359 | 10395 deleted in liver cancer 1                                                    |
| GO | SH2 domain binding                         | 2  | 27   | 0.359 | 3932 lymphocyte-specific protein tyrosine kinase                                   |
| GO | cell-cell adherens junction                | 2  | 27   | 0.359 | 1496 catenin (cadherin-associated protein), alpha 2                                |
| GO | cell-cell adherens junction                | 2  | 27   | 0.359 | 5021 oxytocin receptor                                                             |
| GO | cell aging                                 | 2  | 27   | 0.359 | 3028 hydroxysteroid (17-beta) dehydrogenase 10                                     |
| GO | cell aging                                 | 2  | 27   | 0.359 | 4893 neuroblastoma RAS viral (v-ras) oncogene homolog                              |
| GO | protein ubiquitination                     | 5  | 85   | 0.361 | 10055 SUMO1 activating enzyme subunit 1                                            |
| GO | protein ubiquitination                     | 5  | 85   | 0.361 | 26223 F-box and leucine-rich repeat protein 21 (gene/pseudogene)                   |
| GO | protein ubiquitination                     | 5  | 85   | 0.361 | 409 arrestin, beta 2                                                               |
| GO | protein ubiquitination                     | 5  | 85   | 0.361 | 672 breast cancer 1, early onset                                                   |
| GO | protein ubiquitination                     | 5  | 85   | 0.361 | 7324 ubiquitin-conjugating enzyme E2E 1 (UBC4/5 homolog, yeast)                    |
| GO | cytoplasmic membrane-bounded vesicle       | 5  | 85   | 0.361 | 10457 glycoprotein (transmembrane) nmb                                             |
| GO | cytoplasmic membrane-bounded vesicle       | 5  | 85   | 0.361 | 409 arrestin, beta 2                                                               |
| GO | cytoplasmic membrane-bounded vesicle       | 5  | 85   | 0.361 | 667 dystonin                                                                       |
| GO | cytoplasmic membrane-bounded vesicle       | 5  | 85   | 0.361 | 7037 transferrin receptor (p90, CD71)                                              |
| GO | cytoplasmic membrane-bounded vesicle       | 5  | 85   | 0.361 | 7456 WAS/WASL interacting protein family, member 1                                 |
| GO | early endosome                             | 5  | 85   | 0.361 | 10612 tripartite motif-containing 3                                                |
| GO | early endosome                             | 5  | 85   | 0.361 | 1730 diaphanous homolog 2 (Drosophila)                                             |
| GO | early endosome                             | 5  | 85   | 0.361 | 57590 WD repeat and FYVE domain containing 1                                       |
| GO | early endosome                             | 5  | 85   | 0.361 | 92737 delta/notch-like EGF repeat containing                                       |
| GO | early endosome                             | 5  | 85   | 0.361 | 9910 RAB GTPase activating protein 1-like                                          |
| GO | peptidase inhibitor activity               | 5  | 85   | 0.361 | 12 serpin peptidase inhibitor, clade A (alpha-1 antiproteinase, antitrypsin), me   |
| GO | peptidase inhibitor activity               | 5  | 85   | 0.361 | 140902 R3H domain containing-like                                                  |
| GO | peptidase inhibitor activity               | 5  | 85   | 0.361 | 332 baculoviral IAP repeat-containing 5                                            |
| GO | peptidase inhibitor activity               | 5  | 85   | 0.361 | 5054 serpin peptidase inhibitor, clade E (nexin, plasminogen activator inhibitor t |
| GO | peptidase inhibitor activity               | 5  | 85   | 0.361 | 51050 peptidase inhibitor 15                                                       |
| GO | cytosol                                    | 60 | 1230 | 0.364 | 10056 phenylalanyl-tRNA synthetase, beta subunit                                   |
| GO | cytosol                                    | 60 | 1230 | 0.364 | 10254 signal transducing adaptor molecule (SH3 domain and ITAM motif) 2            |
| GO | cytosol                                    | 60 | 1230 | 0.364 | 1026 cyclin-dependent kinase inhibitor 1A (p21, Cip1)                              |
| GO | cytosol                                    | 60 | 1230 | 0.364 | 10395 deleted in liver cancer 1                                                    |
| GO | cytosol                                    | 60 | 1230 | 0.364 | 11077 heat shock transcription factor 2 binding protein                            |
| GO | cytosol                                    | 60 | 1230 | 0.364 | 158 adenylosuccinate lyase                                                         |
| GO | cytosol                                    | 60 | 1230 | 0.364 | 1716 deoxyguanosine kinase                                                         |

|    |         |    |      |       |                                                                        |
|----|---------|----|------|-------|------------------------------------------------------------------------|
| GO | cytosol | 60 | 1230 | 0.364 | 1730 diaphanous homolog 2 (Drosophila)                                 |
| GO | cytosol | 60 | 1230 | 0.364 | 1781 dynein, cytoplasmic 1, intermediate chain 2                       |
| GO | cytosol | 60 | 1230 | 0.364 | 1830 desmoglein 3 (pemphigus vulgaris antigen)                         |
| GO | cytosol | 60 | 1230 | 0.364 | 1841 deoxythymidylate kinase (thymidylate kinase)                      |
| GO | cytosol | 60 | 1230 | 0.364 | 1983 eukaryotic translation initiation factor 5                        |
| GO | cytosol | 60 | 1230 | 0.364 | 1984 eukaryotic translation initiation factor 5A                       |
| GO | cytosol | 60 | 1230 | 0.364 | 2172 fatty acid binding protein 6, ileal                               |
| GO | cytosol | 60 | 1230 | 0.364 | 2242 feline sarcoma oncogene                                           |
| GO | cytosol | 60 | 1230 | 0.364 | 2273 four and a half LIM domains 1                                     |
| GO | cytosol | 60 | 1230 | 0.364 | 2281 FK506 binding protein 1B, 12.6 kDa                                |
| GO | cytosol | 60 | 1230 | 0.364 | 22934 ribose 5-phosphate isomerase A                                   |
| GO | cytosol | 60 | 1230 | 0.364 | 2534 FYN oncogene related to SRC, FGR, YES                             |
| GO | cytosol | 60 | 1230 | 0.364 | 26230 T-cell lymphoma invasion and metastasis 2                        |
| GO | cytosol | 60 | 1230 | 0.364 | 27289 Rho family GTPase 1                                              |
| GO | cytosol | 60 | 1230 | 0.364 | 27330 ribosomal protein S6 kinase, 90kDa, polypeptide 6                |
| GO | cytosol | 60 | 1230 | 0.364 | 27429 HtrA serine peptidase 2                                          |
| GO | cytosol | 60 | 1230 | 0.364 | 30011 SH3-domain kinase binding protein 1                              |
| GO | cytosol | 60 | 1230 | 0.364 | 3157 3-hydroxy-3-methylglutaryl-Coenzyme A synthase 1 (soluble)        |
| GO | cytosol | 60 | 1230 | 0.364 | 3248 hydroxyprostaglandin dehydrogenase 15-(NAD)                       |
| GO | cytosol | 60 | 1230 | 0.364 | 332 baculoviral IAP repeat-containing 5                                |
| GO | cytosol | 60 | 1230 | 0.364 | 355 Fas (TNF receptor superfamily, member 6)                           |
| GO | cytosol | 60 | 1230 | 0.364 | 3836 karyopherin alpha 1 (importin alpha 5)                            |
| GO | cytosol | 60 | 1230 | 0.364 | 3932 lymphocyte-specific protein tyrosine kinase                       |
| GO | cytosol | 60 | 1230 | 0.364 | 3936 lymphocyte cytosolic protein 1 (L-plastin)                        |
| GO | cytosol | 60 | 1230 | 0.364 | 4734 neural precursor cell expressed, developmentally down-regulated 4 |
| GO | cytosol | 60 | 1230 | 0.364 | 4830 non-metastatic cells 1, protein (NM23A) expressed in              |
| GO | cytosol | 60 | 1230 | 0.364 | 50940 phosphodiesterase 11A                                            |
| GO | cytosol | 60 | 1230 | 0.364 | 51121 ribosomal protein L26-like 1                                     |
| GO | cytosol | 60 | 1230 | 0.364 | 5203 prefoldin subunit 4                                               |
| GO | cytosol | 60 | 1230 | 0.364 | 5341 pleckstrin                                                        |
| GO | cytosol | 60 | 1230 | 0.364 | 57590 WD repeat and FYVE domain containing 1                           |
| GO | cytosol | 60 | 1230 | 0.364 | 57678 glycerol-3-phosphate acyltransferase, mitochondrial              |
| GO | cytosol | 60 | 1230 | 0.364 | 581 BCL2-associated X protein                                          |
| GO | cytosol | 60 | 1230 | 0.364 | 586 branched chain aminotransferase 1, cytosolic                       |
| GO | cytosol | 60 | 1230 | 0.364 | 5924 Ras protein-specific guanine nucleotide-releasing factor 2        |
| GO | cytosol | 60 | 1230 | 0.364 | 6133 ribosomal protein L9                                              |

|    |                                                 |    |      |       |       |                                                                        |
|----|-------------------------------------------------|----|------|-------|-------|------------------------------------------------------------------------|
| GO | cytosol                                         | 60 | 1230 | 0.364 | 6154  | ribosomal protein L26                                                  |
| GO | cytosol                                         | 60 | 1230 | 0.364 | 6204  | ribosomal protein S10                                                  |
| GO | cytosol                                         | 60 | 1230 | 0.364 | 6251  | Ras suppressor protein 1                                               |
| GO | cytosol                                         | 60 | 1230 | 0.364 | 6637  | small nuclear ribonucleoprotein polypeptide G                          |
| GO | cytosol                                         | 60 | 1230 | 0.364 | 6657  | SRY (sex determining region Y)-box 2                                   |
| GO | cytosol                                         | 60 | 1230 | 0.364 | 6711  | spectrin, beta, non-erythrocytic 1                                     |
| GO | cytosol                                         | 60 | 1230 | 0.364 | 6820  | sulfotransferase family, cytosolic, 2B, member 1                       |
| GO | cytosol                                         | 60 | 1230 | 0.364 | 7324  | ubiquitin-conjugating enzyme E2E 1 (UBC4/5 homolog, yeast)             |
| GO | cytosol                                         | 60 | 1230 | 0.364 | 7353  | ubiquitin fusion degradation 1 like (yeast)                            |
| GO | cytosol                                         | 60 | 1230 | 0.364 | 7389  | uroporphyrinogen decarboxylase                                         |
| GO | cytosol                                         | 60 | 1230 | 0.364 | 7840  | Alstrom syndrome 1                                                     |
| GO | cytosol                                         | 60 | 1230 | 0.364 | 7846  | tubulin, alpha 1a                                                      |
| GO | cytosol                                         | 60 | 1230 | 0.364 | 79833 | gem (nuclear organelle) associated protein 6                           |
| GO | cytosol                                         | 60 | 1230 | 0.364 | 8905  | adaptor-related protein complex 1, sigma 2 subunit                     |
| GO | cytosol                                         | 60 | 1230 | 0.364 | 898   | cyclin E1                                                              |
| GO | cytosol                                         | 60 | 1230 | 0.364 | 8997  | kalirin, RhoGEF kinase                                                 |
| GO | cytosol                                         | 60 | 1230 | 0.364 | 91801 | alkB, alkylation repair homolog 8 (E. coli)                            |
| GO | positive regulation of transcription            | 8  | 146  | 0.368 | 10474 | transcriptional adaptor 3                                              |
| GO | positive regulation of transcription            | 8  | 146  | 0.368 | 2736  | GLI family zinc finger 2                                               |
| GO | positive regulation of transcription            | 8  | 146  | 0.368 | 3516  | recombination signal binding protein for immunoglobulin kappa J region |
| GO | positive regulation of transcription            | 8  | 146  | 0.368 | 641   | Bloom syndrome, RecQ helicase-like                                     |
| GO | positive regulation of transcription            | 8  | 146  | 0.368 | 6657  | SRY (sex determining region Y)-box 2                                   |
| GO | positive regulation of transcription            | 8  | 146  | 0.368 | 7046  | transforming growth factor, beta receptor 1                            |
| GO | positive regulation of transcription            | 8  | 146  | 0.368 | 7490  | Wilms tumor 1                                                          |
| GO | positive regulation of transcription            | 8  | 146  | 0.368 | 890   | cyclin A2                                                              |
| GO | structural constituent of ribosome              | 8  | 146  | 0.368 | 11222 | mitochondrial ribosomal protein L3                                     |
| GO | structural constituent of ribosome              | 8  | 146  | 0.368 | 28998 | mitochondrial ribosomal protein L13                                    |
| GO | structural constituent of ribosome              | 8  | 146  | 0.368 | 51023 | mitochondrial ribosomal protein S18C                                   |
| GO | structural constituent of ribosome              | 8  | 146  | 0.368 | 51121 | ribosomal protein L26-like 1                                           |
| GO | structural constituent of ribosome              | 8  | 146  | 0.368 | 6133  | ribosomal protein L9                                                   |
| GO | structural constituent of ribosome              | 8  | 146  | 0.368 | 6154  | ribosomal protein L26                                                  |
| GO | structural constituent of ribosome              | 8  | 146  | 0.368 | 65003 | mitochondrial ribosomal protein L11                                    |
| GO | structural constituent of ribosome              | 8  | 146  | 0.368 | 65008 | mitochondrial ribosomal protein L1                                     |
| GO | RNA polymerase II transcription factor $\alpha$ | 7  | 126  | 0.369 | 2305  | forkhead box M1                                                        |
| GO | RNA polymerase II transcription factor $\alpha$ | 7  | 126  | 0.369 | 29128 | ubiquitin-like with PHD and ring finger domains 1                      |
| GO | RNA polymerase II transcription factor $\alpha$ | 7  | 126  | 0.369 | 3236  | homeobox D10                                                           |

|    |                                                 |   |     |       |                                                                                |
|----|-------------------------------------------------|---|-----|-------|--------------------------------------------------------------------------------|
| GO | RNA polymerase II transcription factor $\alpha$ | 7 | 126 | 0.369 | 3975 LIM homeobox 1                                                            |
| GO | RNA polymerase II transcription factor $\alpha$ | 7 | 126 | 0.369 | 4094 v-maf musculoaponeurotic fibrosarcoma oncogene homolog (avian)            |
| GO | RNA polymerase II transcription factor $\alpha$ | 7 | 126 | 0.369 | 6662 SRY (sex determining region Y)-box 9                                      |
| GO | RNA polymerase II transcription factor $\alpha$ | 7 | 126 | 0.369 | 6899 T-box 1                                                                   |
| GO | protein heterooligomerization                   | 3 | 47  | 0.374 | 1000 cadherin 2, type 1, N-cadherin (neuronal)                                 |
| GO | protein heterooligomerization                   | 3 | 47  | 0.374 | 3751 potassium voltage-gated channel, Shal-related subfamily, member 2         |
| GO | protein heterooligomerization                   | 3 | 47  | 0.374 | 55752 septin 11                                                                |
| GO | neuron differentiation                          | 3 | 47  | 0.374 | 3224 homeobox C8                                                               |
| GO | neuron differentiation                          | 3 | 47  | 0.374 | 347733 tubulin, beta 2B                                                        |
| GO | neuron differentiation                          | 3 | 47  | 0.374 | 5588 protein kinase C, theta                                                   |
| GO | voltage-gated ion channel activity              | 8 | 147 | 0.375 | 3751 potassium voltage-gated channel, Shal-related subfamily, member 2         |
| GO | voltage-gated ion channel activity              | 8 | 147 | 0.375 | 3754 potassium voltage-gated channel, subfamily F, member 1                    |
| GO | voltage-gated ion channel activity              | 8 | 147 | 0.375 | 3756 potassium voltage-gated channel, subfamily H (eag-related), member 1      |
| GO | voltage-gated ion channel activity              | 8 | 147 | 0.375 | 3763 potassium inwardly-rectifying channel, subfamily J, member 6              |
| GO | voltage-gated ion channel activity              | 8 | 147 | 0.375 | 3778 potassium large conductance calcium-activated channel, subfamily M, alpha |
| GO | voltage-gated ion channel activity              | 8 | 147 | 0.375 | 56479 potassium voltage-gated channel, KQT-like subfamily, member 5            |
| GO | voltage-gated ion channel activity              | 8 | 147 | 0.375 | 6335 sodium channel, voltage-gated, type IX, alpha subunit                     |
| GO | voltage-gated ion channel activity              | 8 | 147 | 0.375 | 773 calcium channel, voltage-dependent, P/Q type, alpha 1A subunit             |
| GO | negative regulation of angiogenesis             | 2 | 28  | 0.376 | 1284 collagen, type IV, alpha 2                                                |
| GO | negative regulation of angiogenesis             | 2 | 28  | 0.376 | 6347 chemokine (C-C motif) ligand 2                                            |
| GO | positive regulation of DNA replication          | 2 | 28  | 0.376 | 1763 DNA replication helicase 2 homolog (yeast)                                |
| GO | positive regulation of DNA replication          | 2 | 28  | 0.376 | 2736 GLI family zinc finger 2                                                  |
| GO | memory                                          | 2 | 28  | 0.376 | 5021 oxytocin receptor                                                         |
| GO | memory                                          | 2 | 28  | 0.376 | 9420 cytochrome P450, family 7, subfamily B, polypeptide 1                     |
| GO | activation of phospholipase C activity by       | 2 | 28  | 0.376 | 5028 purinergic receptor P2Y, G-protein coupled, 1                             |
| GO | activation of phospholipase C activity by       | 2 | 28  | 0.376 | 5031 pyrimidinergic receptor P2Y, G-protein coupled, 6                         |
| GO | sensory perception of pain                      | 2 | 28  | 0.376 | 5028 purinergic receptor P2Y, G-protein coupled, 1                             |
| GO | sensory perception of pain                      | 2 | 28  | 0.376 | 60675 prokineticin 2                                                           |
| GO | axon                                            | 7 | 127 | 0.377 | 1496 catenin (cadherin-associated protein), alpha 2                            |
| GO | axon                                            | 7 | 127 | 0.377 | 23705 cell adhesion molecule 1                                                 |
| GO | axon                                            | 7 | 127 | 0.377 | 2898 glutamate receptor, ionotropic, kainate 2                                 |
| GO | axon                                            | 7 | 127 | 0.377 | 3763 potassium inwardly-rectifying channel, subfamily J, member 6              |
| GO | axon                                            | 7 | 127 | 0.377 | 4763 neurofibromin 1                                                           |
| GO | axon                                            | 7 | 127 | 0.377 | 51062 atlastin GTPase 1                                                        |
| GO | axon                                            | 7 | 127 | 0.377 | 55752 septin 11                                                                |
| GO | cardiac muscle tissue development               | 1 | 10  | 0.379 | 10052 gap junction protein, gamma 1, 45kDa                                     |

|    |                                            |   |    |       |        |                                                                               |
|----|--------------------------------------------|---|----|-------|--------|-------------------------------------------------------------------------------|
| GO | regulation of actin cytoskeleton organiz   | 1 | 10 | 0.379 | 10395  | deleted in liver cancer 1                                                     |
| GO | ribonucleoprotein binding                  | 1 | 10 | 0.379 | 10465  | peptidylprolyl isomerase H (cyclophilin H)                                    |
| GO | acetylcholine binding                      | 1 | 10 | 0.379 | 1136   | cholinergic receptor, nicotinic, alpha 3                                      |
| GO | oxygen transporter activity                | 1 | 10 | 0.379 | 114757 | cytoglobin                                                                    |
| GO | oxygen transport                           | 1 | 10 | 0.379 | 114757 | cytoglobin                                                                    |
| GO | transcription elongation regulator activi  | 1 | 10 | 0.379 | 170082 | transcription elongation factor A (SII) N-terminal and central domain contain |
| GO | hormone biosynthetic process               | 1 | 10 | 0.379 | 1733   | deiodinase, iodothyronine, type I                                             |
| GO | cytoplasmic dynein complex                 | 1 | 10 | 0.379 | 1781   | dynein, cytoplasmic 1, intermediate chain 2                                   |
| GO | regulation of gene expression by geneti    | 1 | 10 | 0.379 | 1788   | DNA (cytosine-5-)-methyltransferase 3 alpha                                   |
| GO | ATP metabolic process                      | 1 | 10 | 0.379 | 203    | adenylate kinase 1                                                            |
| GO | elevation of cytosolic calcium ion conce   | 1 | 10 | 0.379 | 2149   | coagulation factor II (thrombin) receptor                                     |
| GO | positive regulation of collagen biosynthe  | 1 | 10 | 0.379 | 2149   | coagulation factor II (thrombin) receptor                                     |
| GO | positive regulation of positive chemotax   | 1 | 10 | 0.379 | 2150   | coagulation factor II (thrombin) receptor-like 1                              |
| GO | NAD metabolic process                      | 1 | 10 | 0.379 | 23057  | nicotinamide nucleotide adenylyltransferase 2                                 |
| GO | fatty acid transport                       | 1 | 10 | 0.379 | 23305  | acyl-CoA synthetase long-chain family member 6                                |
| GO | cilium membrane                            | 1 | 10 | 0.379 | 27241  | Bardet-Biedl syndrome 9                                                       |
| GO | osteoblast development                     | 1 | 10 | 0.379 | 2736   | GLI family zinc finger 2                                                      |
| GO | glutathione peroxidase activity            | 1 | 10 | 0.379 | 2878   | glutathione peroxidase 3 (plasma)                                             |
| GO | outer membrane-bounded periplasmic :       | 1 | 10 | 0.379 | 2906   | glutamate receptor, ionotropic, N-methyl D-aspartate 2D                       |
| GO | Ran GTPase binding                         | 1 | 10 | 0.379 | 332    | baculoviral IAP repeat-containing 5                                           |
| GO | cholesterol catabolic process              | 1 | 10 | 0.379 | 348    | apolipoprotein E                                                              |
| GO | lipoprotein binding                        | 1 | 10 | 0.379 | 348    | apolipoprotein E                                                              |
| GO | negative regulation of hormone secretio    | 1 | 10 | 0.379 | 3589   | interleukin 11                                                                |
| GO | small conjugating protein ligase activity  | 1 | 10 | 0.379 | 389898 | ubiquitin-conjugating enzyme E2N-like                                         |
| GO | phosphoinositide 3-kinase binding          | 1 | 10 | 0.379 | 3932   | lymphocyte-specific protein tyrosine kinase                                   |
| GO | positive regulation of T cell activation   | 1 | 10 | 0.379 | 3932   | lymphocyte-specific protein tyrosine kinase                                   |
| GO | double-strand break repair via nonhom      | 1 | 10 | 0.379 | 4292   | mutL homolog 1, colon cancer, nonpolyposis type 2 (E. coli)                   |
| GO | cognition                                  | 1 | 10 | 0.379 | 4763   | neurofibromin 1                                                               |
| GO | positive regulation of smooth muscle ce    | 1 | 10 | 0.379 | 5031   | pyrimidinergic receptor P2Y, G-protein coupled, 6                             |
| GO | defense response to Gram-negative bac      | 1 | 10 | 0.379 | 5054   | serpin peptidase inhibitor, clade E (nexin, plasminogen activator inhibitor t |
| GO | negative regulation of fibrinolysis        | 1 | 10 | 0.379 | 5054   | serpin peptidase inhibitor, clade E (nexin, plasminogen activator inhibitor t |
| GO | positive regulation of interleukin-8 prod  | 1 | 10 | 0.379 | 5054   | serpin peptidase inhibitor, clade E (nexin, plasminogen activator inhibitor t |
| GO | Golgi lumen                                | 1 | 10 | 0.379 | 5125   | proprotein convertase subtilisin/kexin type 5                                 |
| GO | 3',5'-cyclic-AMP phosphodiesterase acti    | 1 | 10 | 0.379 | 5140   | phosphodiesterase 3B, cGMP-inhibited                                          |
| GO | XY body                                    | 1 | 10 | 0.379 | 56852  | RAD18 homolog (S. cerevisiae)                                                 |
| GO | positive regulation of activated T cell pr | 1 | 10 | 0.379 | 57678  | glycerol-3-phosphate acyltransferase, mitochondrial                           |

|    |                                                  |    |     |       |        |                                                                              |
|----|--------------------------------------------------|----|-----|-------|--------|------------------------------------------------------------------------------|
| GO | defense response to fungus                       | 1  | 10  | 0.379 | 57817  | hepcidin antimicrobial peptide                                               |
| GO | killing of cells of another organism             | 1  | 10  | 0.379 | 57817  | hepcidin antimicrobial peptide                                               |
| GO | apoptotic mitochondrial changes                  | 1  | 10  | 0.379 | 581    | BCL2-associated X protein                                                    |
| GO | regulation of mitochondrial membrane             | 1  | 10  | 0.379 | 581    | BCL2-associated X protein                                                    |
| GO | limb development                                 | 1  | 10  | 0.379 | 6299   | sal-like 1 (Drosophila)                                                      |
| GO | macrophage chemotaxis                            | 1  | 10  | 0.379 | 6347   | chemokine (C-C motif) ligand 2                                               |
| GO | positive regulation of epithelial cell migration | 1  | 10  | 0.379 | 659    | bone morphogenetic protein receptor, type II (serine/threonine kinase)       |
| GO | microtubule plus-end binding                     | 1  | 10  | 0.379 | 667    | dystonin                                                                     |
| GO | microtubule bundle formation                     | 1  | 10  | 0.379 | 6683   | spastin                                                                      |
| GO | I band                                           | 1  | 10  | 0.379 | 70     | actin, alpha, cardiac muscle 1                                               |
| GO | response to iron ion                             | 1  | 10  | 0.379 | 7037   | transferrin receptor (p90, CD71)                                             |
| GO | I-SMAD binding                                   | 1  | 10  | 0.379 | 7046   | transforming growth factor, beta receptor 1                                  |
| GO | transforming growth factor beta binding          | 1  | 10  | 0.379 | 7046   | transforming growth factor, beta receptor 1                                  |
| GO | metalloendopeptidase inhibitor activity          | 1  | 10  | 0.379 | 7078   | TIMP metallopeptidase inhibitor 3                                            |
| GO | Wnt receptor activity                            | 1  | 10  | 0.379 | 8325   | frizzled homolog 8 (Drosophila)                                              |
| GO | signalosome                                      | 1  | 10  | 0.379 | 8533   | COP9 constitutive photomorphogenic homolog subunit 3 (Arabidopsis)           |
| GO | L-glutamate transmembrane transporter            | 1  | 10  | 0.379 | 8604   | solute carrier family 25 (mitochondrial carrier, Aralar), member 12          |
| GO | G1 phase of mitotic cell cycle                   | 1  | 10  | 0.379 | 8872   | cell division cycle 123 homolog (S. cerevisiae)                              |
| GO | cytokine binding                                 | 1  | 10  | 0.379 | 9244   | cytokine receptor-like factor 1                                              |
| GO | prostate gland epithelium morphogenesis          | 1  | 10  | 0.379 | 9420   | cytochrome P450, family 7, subfamily B, polypeptide 1                        |
| GO | nuclear membrane                                 | 5  | 87  | 0.379 | 166336 | prickle homolog 2 (Drosophila)                                               |
| GO | nuclear membrane                                 | 5  | 87  | 0.379 | 241    | arachidonate 5-lipoxygenase-activating protein                               |
| GO | nuclear membrane                                 | 5  | 87  | 0.379 | 4928   | nucleoporin 98kDa                                                            |
| GO | nuclear membrane                                 | 5  | 87  | 0.379 | 7341   | SMT3 suppressor of mif two 3 homolog 1 (S. cerevisiae)                       |
| GO | nuclear membrane                                 | 5  | 87  | 0.379 | 9805   | secernin 1                                                                   |
| GO | visual perception                                | 10 | 189 | 0.382 | 10052  | gap junction protein, gamma 1, 45kDa                                         |
| GO | visual perception                                | 10 | 189 | 0.382 | 1121   | choroideremia (Rab escort protein 1)                                         |
| GO | visual perception                                | 10 | 189 | 0.382 | 1301   | collagen, type XI, alpha 1                                                   |
| GO | visual perception                                | 10 | 189 | 0.382 | 27241  | Bardet-Biedl syndrome 9                                                      |
| GO | visual perception                                | 10 | 189 | 0.382 | 4060   | lumican                                                                      |
| GO | visual perception                                | 10 | 189 | 0.382 | 5145   | phosphodiesterase 6A, cGMP-specific, rod, alpha                              |
| GO | visual perception                                | 10 | 189 | 0.382 | 5264   | phytanoyl-CoA 2-hydroxylase                                                  |
| GO | visual perception                                | 10 | 189 | 0.382 | 6785   | elongation of very long chain fatty acids (FEN1/Elo2, SUR4/Elo3, yeast)-like |
| GO | visual perception                                | 10 | 189 | 0.382 | 7078   | TIMP metallopeptidase inhibitor 3                                            |
| GO | visual perception                                | 10 | 189 | 0.382 | 7840   | Alstrom syndrome 1                                                           |
| GO | ATPase activity                                  | 7  | 128 | 0.385 | 1763   | DNA replication helicase 2 homolog (yeast)                                   |

|    |                                     |    |     |       |        |                                                                                        |
|----|-------------------------------------|----|-----|-------|--------|----------------------------------------------------------------------------------------|
| GO | ATPase activity                     | 7  | 128 | 0.385 | 26154  | ATP-binding cassette, sub-family A (ABC1), member 12                                   |
| GO | ATPase activity                     | 7  | 128 | 0.385 | 340273 | ATP-binding cassette, sub-family B (MDR/TAP), member 5                                 |
| GO | ATPase activity                     | 7  | 128 | 0.385 | 4436   | mutS homolog 2, colon cancer, nonpolyposis type 1 (E. coli)                            |
| GO | ATPase activity                     | 7  | 128 | 0.385 | 641    | Bloom syndrome, RecQ helicase-like                                                     |
| GO | ATPase activity                     | 7  | 128 | 0.385 | 6833   | ATP-binding cassette, sub-family C (CFTR/MRP), member 8                                |
| GO | ATPase activity                     | 7  | 128 | 0.385 | 70     | actin, alpha, cardiac muscle 1                                                         |
| GO | serine-type peptidase activity      | 3  | 48  | 0.387 | 344805 | transmembrane protease, serine 7                                                       |
| GO | serine-type peptidase activity      | 3  | 48  | 0.387 | 7113   | transmembrane protease, serine 2                                                       |
| GO | serine-type peptidase activity      | 3  | 48  | 0.387 | 90701  | SEC11 homolog C (S. cerevisiae)                                                        |
| GO | fatty acid biosynthetic process     | 3  | 48  | 0.387 | 55301  | oleoyl-ACP hydrolase                                                                   |
| GO | fatty acid biosynthetic process     | 3  | 48  | 0.387 | 6785   | elongation of very long chain fatty acids (FEN1/Elo2, SUR4/Elo3, yeast)-like           |
| GO | fatty acid biosynthetic process     | 3  | 48  | 0.387 | 79993  | ELOVL family member 7, elongation of long chain fatty acids (yeast)                    |
| GO | cytokine-mediated signaling pathway | 3  | 48  | 0.387 | 55854  | zinc finger CCCH-type containing 15                                                    |
| GO | cytokine-mediated signaling pathway | 3  | 48  | 0.387 | 6347   | chemokine (C-C motif) ligand 2                                                         |
| GO | cytokine-mediated signaling pathway | 3  | 48  | 0.387 | 729230 | chemokine (C-C motif) receptor 2                                                       |
| GO | positive regulation of apoptosis    | 6  | 108 | 0.387 | 220    | aldehyde dehydrogenase 1 family, member A3                                             |
| GO | positive regulation of apoptosis    | 6  | 108 | 0.387 | 27429  | HtrA serine peptidase 2                                                                |
| GO | positive regulation of apoptosis    | 6  | 108 | 0.387 | 3778   | potassium large conductance calcium-activated channel, subfamily M, alpha              |
| GO | positive regulation of apoptosis    | 6  | 108 | 0.387 | 4318   | matrix metalloproteinase 9 (gelatinase B, 92kDa gelatinase, 92kDa type IV collagenase) |
| GO | positive regulation of apoptosis    | 6  | 108 | 0.387 | 4763   | neurofibromin 1                                                                        |
| GO | positive regulation of apoptosis    | 6  | 108 | 0.387 | 6659   | SRY (sex determining region Y)-box 4                                                   |
| GO | mRNA processing                     | 12 | 231 | 0.387 | 10189  | THO complex 4                                                                          |
| GO | mRNA processing                     | 12 | 231 | 0.387 | 10492  | synaptotagmin binding, cytoplasmic RNA interacting protein                             |
| GO | mRNA processing                     | 12 | 231 | 0.387 | 10656  | KH domain containing, RNA binding, signal transduction associated 3                    |
| GO | mRNA processing                     | 12 | 231 | 0.387 | 135295 | splicing factor, arginine/serine-rich 13B                                              |
| GO | mRNA processing                     | 12 | 231 | 0.387 | 23658  | LSM5 homolog, U6 small nuclear RNA associated (S. cerevisiae)                          |
| GO | mRNA processing                     | 12 | 231 | 0.387 | 27258  | LSM3 homolog, U6 small nuclear RNA associated (S. cerevisiae)                          |
| GO | mRNA processing                     | 12 | 231 | 0.387 | 51645  | peptidylprolyl isomerase (cyclophilin)-like 1                                          |
| GO | mRNA processing                     | 12 | 231 | 0.387 | 53981  | cleavage and polyadenylation specific factor 2, 100kDa                                 |
| GO | mRNA processing                     | 12 | 231 | 0.387 | 58155  | polypyrimidine tract binding protein 2                                                 |
| GO | mRNA processing                     | 12 | 231 | 0.387 | 6637   | small nuclear ribonucleoprotein polypeptide G                                          |
| GO | mRNA processing                     | 12 | 231 | 0.387 | 8458   | transcription termination factor, RNA polymerase II                                    |
| GO | mRNA processing                     | 12 | 231 | 0.387 | 8563   | THO complex 5                                                                          |
| GO | electron carrier activity           | 8  | 149 | 0.389 | 10539  | glutaredoxin 3                                                                         |
| GO | electron carrier activity           | 8  | 149 | 0.389 | 1543   | cytochrome P450, family 1, subfamily A, polypeptide 1                                  |
| GO | electron carrier activity           | 8  | 149 | 0.389 | 339761 | cytochrome P450, family 27, subfamily C, polypeptide 1                                 |

|    |                                         |    |     |       |        |                                                                               |
|----|-----------------------------------------|----|-----|-------|--------|-------------------------------------------------------------------------------|
| GO | electron carrier activity               | 8  | 149 | 0.389 | 51218  | glutaredoxin 5                                                                |
| GO | electron carrier activity               | 8  | 149 | 0.389 | 5264   | phytanoyl-CoA 2-hydroxylase                                                   |
| GO | electron carrier activity               | 8  | 149 | 0.389 | 8659   | aldehyde dehydrogenase 4 family, member A1                                    |
| GO | electron carrier activity               | 8  | 149 | 0.389 | 91942  | NADH dehydrogenase (ubiquinone) 1 alpha subcomplex, assembly factor 2         |
| GO | electron carrier activity               | 8  | 149 | 0.389 | 9420   | cytochrome P450, family 7, subfamily B, polypeptide 1                         |
| GO | steroid metabolic process               | 4  | 68  | 0.389 | 114880 | oxysterol binding protein-like 6                                              |
| GO | steroid metabolic process               | 4  | 68  | 0.389 | 2172   | fatty acid binding protein 6, ileal                                           |
| GO | steroid metabolic process               | 4  | 68  | 0.389 | 6820   | sulfotransferase family, cytosolic, 2B, member 1                              |
| GO | steroid metabolic process               | 4  | 68  | 0.389 | 9420   | cytochrome P450, family 7, subfamily B, polypeptide 1                         |
| GO | Rho guanyl-nucleotide exchange factor   | 4  | 68  | 0.389 | 153478 | pleckstrin homology domain containing, family G (with RhoGef domain) me       |
| GO | Rho guanyl-nucleotide exchange factor   | 4  | 68  | 0.389 | 26230  | T-cell lymphoma invasion and metastasis 2                                     |
| GO | Rho guanyl-nucleotide exchange factor   | 4  | 68  | 0.389 | 5924   | Ras protein-specific guanine nucleotide-releasing factor 2                    |
| GO | Rho guanyl-nucleotide exchange factor   | 4  | 68  | 0.389 | 8997   | kalirin, RhoGEF kinase                                                        |
| GO | protein kinase C binding                | 2  | 29  | 0.393 | 10539  | glutaredoxin 3                                                                |
| GO | protein kinase C binding                | 2  | 29  | 0.393 | 5341   | pleckstrin                                                                    |
| GO | positive regulation of smooth muscle ce | 2  | 29  | 0.393 | 2321   | fms-related tyrosine kinase 1 (vascular endothelial growth factor/vascular p  |
| GO | positive regulation of smooth muscle ce | 2  | 29  | 0.393 | 3516   | recombination signal binding protein for immunoglobulin kappa J region        |
| GO | growth                                  | 2  | 29  | 0.393 | 3624   | inhibin, beta A                                                               |
| GO | growth                                  | 2  | 29  | 0.393 | 84620  | ST6 beta-galactosamide alpha-2,6-sialyltransferase 2                          |
| GO | positive regulation of ERK1 and ERK2 ca | 2  | 29  | 0.393 | 409    | arrestin, beta 2                                                              |
| GO | positive regulation of ERK1 and ERK2 ca | 2  | 29  | 0.393 | 7010   | TEK tyrosine kinase, endothelial                                              |
| GO | soluble fraction                        | 16 | 315 | 0.393 | 10056  | phenylalanyl-tRNA synthetase, beta subunit                                    |
| GO | soluble fraction                        | 16 | 315 | 0.393 | 11142  | protein kinase (cAMP-dependent, catalytic) inhibitor gamma                    |
| GO | soluble fraction                        | 16 | 315 | 0.393 | 1161   | excision repair cross-complementing rodent repair deficiency, complement      |
| GO | soluble fraction                        | 16 | 315 | 0.393 | 2878   | glutathione peroxidase 3 (plasma)                                             |
| GO | soluble fraction                        | 16 | 315 | 0.393 | 3157   | 3-hydroxy-3-methylglutaryl-Coenzyme A synthase 1 (soluble)                    |
| GO | soluble fraction                        | 16 | 315 | 0.393 | 355    | Fas (TNF receptor superfamily, member 6)                                      |
| GO | soluble fraction                        | 16 | 315 | 0.393 | 4830   | non-metastatic cells 1, protein (NM23A) expressed in                          |
| GO | soluble fraction                        | 16 | 315 | 0.393 | 5054   | serpin peptidase inhibitor, clade E (nexin, plasminogen activator inhibitor t |
| GO | soluble fraction                        | 16 | 315 | 0.393 | 50940  | phosphodiesterase 11A                                                         |
| GO | soluble fraction                        | 16 | 315 | 0.393 | 5341   | pleckstrin                                                                    |
| GO | soluble fraction                        | 16 | 315 | 0.393 | 55577  | N-acetylglucosamine kinase                                                    |
| GO | soluble fraction                        | 16 | 315 | 0.393 | 5569   | protein kinase (cAMP-dependent, catalytic) inhibitor alpha                    |
| GO | soluble fraction                        | 16 | 315 | 0.393 | 5588   | protein kinase C, theta                                                       |
| GO | soluble fraction                        | 16 | 315 | 0.393 | 70     | actin, alpha, cardiac muscle 1                                                |
| GO | soluble fraction                        | 16 | 315 | 0.393 | 729230 | chemokine (C-C motif) receptor 2                                              |



|    |                                   |    |     |       |        |                                                                             |
|----|-----------------------------------|----|-----|-------|--------|-----------------------------------------------------------------------------|
| GO | soluble fraction                  | 16 | 315 | 0.393 | 8788   | delta-like 1 homolog (Drosophila)                                           |
| GO | microtubule                       | 12 | 233 | 0.399 | 1781   | dynein, cytoplasmic 1, intermediate chain 2                                 |
| GO | microtubule                       | 12 | 233 | 0.399 | 26586  | cytoskeleton associated protein 2                                           |
| GO | microtubule                       | 12 | 233 | 0.399 | 347733 | tubulin, beta 2B                                                            |
| GO | microtubule                       | 12 | 233 | 0.399 | 3797   | kinesin family member 3C                                                    |
| GO | microtubule                       | 12 | 233 | 0.399 | 3800   | kinesin family member 5C                                                    |
| GO | microtubule                       | 12 | 233 | 0.399 | 400954 | echinoderm microtubule associated protein like 6                            |
| GO | microtubule                       | 12 | 233 | 0.399 | 54839  | leucine rich repeat containing 49                                           |
| GO | microtubule                       | 12 | 233 | 0.399 | 6683   | spastin                                                                     |
| GO | microtubule                       | 12 | 233 | 0.399 | 79187  | fibronectin type III and SPRY domain containing 1                           |
| GO | microtubule                       | 12 | 233 | 0.399 | 79861  | tubulin, alpha-like 3                                                       |
| GO | microtubule                       | 12 | 233 | 0.399 | 9053   | microtubule-associated protein 7                                            |
| GO | microtubule                       | 12 | 233 | 0.399 | 93323  | HAUS augmin-like complex, subunit 8                                         |
| GO | phospholipid biosynthetic process | 3  | 49  | 0.399 | 23305  | acyl-CoA synthetase long-chain family member 6                              |
| GO | phospholipid biosynthetic process | 3  | 49  | 0.399 | 57678  | glycerol-3-phosphate acyltransferase, mitochondrial                         |
| GO | phospholipid biosynthetic process | 3  | 49  | 0.399 | 5833   | phosphate cytidyltransferase 2, ethanolamine                                |
| GO | single-stranded DNA binding       | 3  | 49  | 0.399 | 4292   | mutL homolog 1, colon cancer, nonpolyposis type 2 (E. coli)                 |
| GO | single-stranded DNA binding       | 3  | 49  | 0.399 | 4436   | mutS homolog 2, colon cancer, nonpolyposis type 1 (E. coli)                 |
| GO | single-stranded DNA binding       | 3  | 49  | 0.399 | 641    | Bloom syndrome, RecQ helicase-like                                          |
| GO | mRNA transport                    | 3  | 49  | 0.399 | 4928   | nucleoporin 98kDa                                                           |
| GO | mRNA transport                    | 3  | 49  | 0.399 | 55916  | nuclear transport factor 2-like export factor 2                             |
| GO | mRNA transport                    | 3  | 49  | 0.399 | 9688   | nucleoporin 93kDa                                                           |
| GO | protein transporter activity      | 4  | 69  | 0.4   | 11154  | adaptor-related protein complex 4, sigma 1 subunit                          |
| GO | protein transporter activity      | 4  | 69  | 0.4   | 3836   | karyopherin alpha 1 (importin alpha 5)                                      |
| GO | protein transporter activity      | 4  | 69  | 0.4   | 3838   | karyopherin alpha 2 (RAG cohort 1, importin alpha 1)                        |
| GO | protein transporter activity      | 4  | 69  | 0.4   | 8905   | adaptor-related protein complex 1, sigma 2 subunit                          |
| GO | cell communication                | 5  | 90  | 0.407 | 127534 | gap junction protein, beta 4, 30.3kDa                                       |
| GO | cell communication                | 5  | 90  | 0.407 | 182    | jagged 1 (Alagille syndrome)                                                |
| GO | cell communication                | 5  | 90  | 0.407 | 29887  | sorting nexin 10                                                            |
| GO | cell communication                | 5  | 90  | 0.407 | 4763   | neurofibromin 1                                                             |
| GO | cell communication                | 5  | 90  | 0.407 | 6546   | solute carrier family 8 (sodium/calcium exchanger), member 1                |
| GO | spindle                           | 5  | 90  | 0.407 | 23157  | septin 6                                                                    |
| GO | spindle                           | 5  | 90  | 0.407 | 332    | baculoviral IAP repeat-containing 5                                         |
| GO | spindle                           | 5  | 90  | 0.407 | 5303   | protein (peptidylprolyl cis/trans isomerase) NIMA-interacting, 4 (parvulin) |
| GO | spindle                           | 5  | 90  | 0.407 | 54984  | PIN2-interacting protein 1                                                  |
| GO | spindle                           | 5  | 90  | 0.407 | 6683   | spastin                                                                     |

|    |                                                    |   |    |       |        |                                                                                          |
|----|----------------------------------------------------|---|----|-------|--------|------------------------------------------------------------------------------------------|
| GO | gamma-catenin binding                              | 1 | 11 | 0.407 | 1000   | cadherin 2, type 1, N-cadherin (neuronal)                                                |
| GO | positive regulation of axon extension              | 1 | 11 | 0.407 | 1002   | cadherin 4, type 1, R-cadherin (retinal)                                                 |
| GO | mitotic sister chromatid segregation               | 1 | 11 | 0.407 | 10051  | structural maintenance of chromosomes 4                                                  |
| GO | cell-cell junction assembly                        | 1 | 11 | 0.407 | 10052  | gap junction protein, gamma 1, 45kDa                                                     |
| GO | cellular response to oxidative stress              | 1 | 11 | 0.407 | 10202  | dehydrogenase/reductase (SDR family) member 2                                            |
| GO | cyclin-dependent protein kinase inhibition         | 1 | 11 | 0.407 | 1026   | cyclin-dependent kinase inhibitor 1A (p21, Cip1)                                         |
| GO | trophoblast cell differentiation                   | 1 | 11 | 0.407 | 1045   | caudal type homeobox 2                                                                   |
| GO | estrogen receptor signaling pathway                | 1 | 11 | 0.407 | 10474  | transcriptional adaptor 3                                                                |
| GO | positive regulation of neurogenesis                | 1 | 11 | 0.407 | 10683  | delta-like 3 (Drosophila)                                                                |
| GO | gap junction channel activity                      | 1 | 11 | 0.407 | 127534 | gap junction protein, beta 4, 30.3kDa                                                    |
| GO | response to vitamin A                              | 1 | 11 | 0.407 | 1543   | cytochrome P450, family 1, subfamily A, polypeptide 1                                    |
| GO | protein tetramerization                            | 1 | 11 | 0.407 | 158    | adenylosuccinate lyase                                                                   |
| GO | DNA methylation involved in gamete gene            | 1 | 11 | 0.407 | 1788   | DNA (cytosine-5-)-methyltransferase 3 alpha                                              |
| GO | cell fate determination                            | 1 | 11 | 0.407 | 182    | jagged 1 (Alagille syndrome)                                                             |
| GO | pyridine nucleotide biosynthetic process           | 1 | 11 | 0.407 | 23057  | nicotinamide nucleotide adenylyltransferase 2                                            |
| GO | positive regulation of vascular endothelial        | 1 | 11 | 0.407 | 2321   | fms-related tyrosine kinase 1 (vascular endothelial growth factor/vascular permeability) |
| GO | long-chain fatty acid-CoA ligase activity          | 1 | 11 | 0.407 | 23305  | acyl-CoA synthetase long-chain family member 6                                           |
| GO | positive regulation of neuron projection           | 1 | 11 | 0.407 | 23305  | acyl-CoA synthetase long-chain family member 6                                           |
| GO | cell recognition                                   | 1 | 11 | 0.407 | 23705  | cell adhesion molecule 1                                                                 |
| GO | Ras GTPase binding                                 | 1 | 11 | 0.407 | 25780  | RAS guanyl releasing protein 3 (calcium and DAG-regulated)                               |
| GO | morphogenesis of an epithelium                     | 1 | 11 | 0.407 | 2736   | GLI family zinc finger 2                                                                 |
| GO | adenylate cyclase activity                         | 1 | 11 | 0.407 | 2774   | guanine nucleotide binding protein (G protein), alpha activating activity polypeptide 1  |
| GO | regulation of synaptic transmission                | 1 | 11 | 0.407 | 2898   | glutamate receptor, ionotropic, kainate 2                                                |
| GO | RNA polymerase II carboxy-terminal domain          | 1 | 11 | 0.407 | 2965   | general transcription factor IIF, polypeptide 1, 62kDa                                   |
| GO | DNA bending activity                               | 1 | 11 | 0.407 | 3149   | high-mobility group box 3                                                                |
| GO | low-density lipoprotein receptor binding           | 1 | 11 | 0.407 | 348    | apolipoprotein E                                                                         |
| GO | positive regulation of erythrocyte differentiation | 1 | 11 | 0.407 | 3624   | inhibin, beta A                                                                          |
| GO | delayed rectifier potassium channel activity       | 1 | 11 | 0.407 | 3756   | potassium voltage-gated channel, subfamily H (eag-related), member 1                     |
| GO | myoblast fusion                                    | 1 | 11 | 0.407 | 3756   | potassium voltage-gated channel, subfamily H (eag-related), member 1                     |
| GO | motor axon guidance                                | 1 | 11 | 0.407 | 3800   | kinesin family member 5C                                                                 |
| GO | hemidesmosome assembly                             | 1 | 11 | 0.407 | 3918   | laminin, gamma 2                                                                         |
| GO | pericentriolar material                            | 1 | 11 | 0.407 | 3932   | lymphocyte-specific protein tyrosine kinase                                              |
| GO | bile acid metabolic process                        | 1 | 11 | 0.407 | 3952   | leptin                                                                                   |
| GO | cerebellum development                             | 1 | 11 | 0.407 | 3975   | LIM homeobox 1                                                                           |
| GO | negative regulation of protein ubiquitination      | 1 | 11 | 0.407 | 409    | arrestin, beta 2                                                                         |
| GO | negative regulation of MAPKKK cascade              | 1 | 11 | 0.407 | 4763   | neurofibromin 1                                                                          |

|    |                                           |    |     |       |                                                                                   |
|----|-------------------------------------------|----|-----|-------|-----------------------------------------------------------------------------------|
| GO | gamma-tubulin binding                     | 1  | 11  | 0.407 | 4830 non-metastatic cells 1, protein (NM23A) expressed in                         |
| GO | positive regulation of DNA binding        | 1  | 11  | 0.407 | 4830 non-metastatic cells 1, protein (NM23A) expressed in                         |
| GO | positive regulation of calcium ion transp | 1  | 11  | 0.407 | 5026 purinergic receptor P2X, ligand-gated ion channel, 5                         |
| GO | endoplasmic reticulum organization        | 1  | 11  | 0.407 | 51062 atlastin GTPase 1                                                           |
| GO | peptide hormone processing                | 1  | 11  | 0.407 | 5125 proprotein convertase subtilisin/kexin type 5                                |
| GO | protein maturation by peptide bond cle    | 1  | 11  | 0.407 | 5125 proprotein convertase subtilisin/kexin type 5                                |
| GO | phosphatidylserine binding                | 1  | 11  | 0.407 | 54843 synaptotagmin-like 2                                                        |
| GO | polysaccharide binding                    | 1  | 11  | 0.407 | 56241 sushi domain containing 2                                                   |
| GO | glucose transmembrane transporter act     | 1  | 11  | 0.407 | 6518 solute carrier family 2 (facilitated glucose/fructose transporter), member 5 |
| GO | regulation of calcium ion transport       | 1  | 11  | 0.407 | 6546 solute carrier family 8 (sodium/calcium exchanger), member 1                 |
| GO | neural crest cell development             | 1  | 11  | 0.407 | 6662 SRY (sex determining region Y)-box 9                                         |
| GO | oligodendrocyte differentiation           | 1  | 11  | 0.407 | 6662 SRY (sex determining region Y)-box 9                                         |
| GO | non-G-protein coupled 7TM receptor ac     | 1  | 11  | 0.407 | 8325 frizzled homolog 8 (Drosophila)                                              |
| GO | phospholipase C activity                  | 1  | 11  | 0.407 | 9744 ArfGAP with coiled-coil, ankyrin repeat and PH domains 1                     |
| GO | peptidase activity                        | 23 | 465 | 0.408 | 10213 proteasome (prosome, macropain) 26S subunit, non-ATPase, 14                 |
| GO | peptidase activity                        | 23 | 465 | 0.408 | 10893 matrix metallopeptidase 24 (membrane-inserted)                              |
| GO | peptidase activity                        | 23 | 465 | 0.408 | 132724 transmembrane protease, serine 11B                                         |
| GO | peptidase activity                        | 23 | 465 | 0.408 | 162494 rhomboid, veinlet-like 3 (Drosophila)                                      |
| GO | peptidase activity                        | 23 | 465 | 0.408 | 27429 HtrA serine peptidase 2                                                     |
| GO | peptidase activity                        | 23 | 465 | 0.408 | 344805 transmembrane protease, serine 7                                           |
| GO | peptidase activity                        | 23 | 465 | 0.408 | 373856 ubiquitin specific peptidase 41                                            |
| GO | peptidase activity                        | 23 | 465 | 0.408 | 4287 ataxin 3                                                                     |
| GO | peptidase activity                        | 23 | 465 | 0.408 | 4312 matrix metallopeptidase 1 (interstitial collagenase)                         |
| GO | peptidase activity                        | 23 | 465 | 0.408 | 4318 matrix metallopeptidase 9 (gelatinase B, 92kDa gelatinase, 92kDa type IV c   |
| GO | peptidase activity                        | 23 | 465 | 0.408 | 4319 matrix metallopeptidase 10 (stromelysin 2)                                   |
| GO | peptidase activity                        | 23 | 465 | 0.408 | 5125 proprotein convertase subtilisin/kexin type 5                                |
| GO | peptidase activity                        | 23 | 465 | 0.408 | 5184 peptidase D                                                                  |
| GO | peptidase activity                        | 23 | 465 | 0.408 | 5624 protein C (inactivator of coagulation factors Va and VIIIa)                  |
| GO | peptidase activity                        | 23 | 465 | 0.408 | 5654 HtrA serine peptidase 1                                                      |
| GO | peptidase activity                        | 23 | 465 | 0.408 | 57478 ubiquitin specific peptidase 31                                             |
| GO | peptidase activity                        | 23 | 465 | 0.408 | 7037 transferrin receptor (p90, CD71)                                             |
| GO | peptidase activity                        | 23 | 465 | 0.408 | 7113 transmembrane protease, serine 2                                             |
| GO | peptidase activity                        | 23 | 465 | 0.408 | 7347 ubiquitin carboxyl-terminal esterase L3 (ubiquitin thiolesterase)            |
| GO | peptidase activity                        | 23 | 465 | 0.408 | 84101 ubiquitin specific peptidase 44                                             |
| GO | peptidase activity                        | 23 | 465 | 0.408 | 8728 ADAM metallopeptidase domain 19 (meltrin beta)                               |
| GO | peptidase activity                        | 23 | 465 | 0.408 | 8747 ADAM metallopeptidase domain 21                                              |

|    |                                           |    |     |       |                                                                          |
|----|-------------------------------------------|----|-----|-------|--------------------------------------------------------------------------|
| GO | peptidase activity                        | 23 | 465 | 0.408 | 90701 SEC11 homolog C ( <i>S. cerevisiae</i> )                           |
| GO | DNA-directed DNA polymerase activity      | 2  | 30  | 0.409 | 157570 establishment of cohesion 1 homolog 2 ( <i>S. cerevisiae</i> )    |
| GO | DNA-directed DNA polymerase activity      | 2  | 30  | 0.409 | 56655 polymerase (DNA-directed), epsilon 4 (p12 subunit)                 |
| GO | steroid biosynthetic process              | 2  | 30  | 0.409 | 2232 ferredoxin reductase                                                |
| GO | steroid biosynthetic process              | 2  | 30  | 0.409 | 29842 transcription factor CP2-like 1                                    |
| GO | adult locomotory behavior                 | 2  | 30  | 0.409 | 2906 glutamate receptor, ionotropic, N-methyl D-aspartate 2D             |
| GO | adult locomotory behavior                 | 2  | 30  | 0.409 | 3236 homeobox D10                                                        |
| GO | dorsal/ventral pattern formation          | 2  | 30  | 0.409 | 3237 homeobox D11                                                        |
| GO | dorsal/ventral pattern formation          | 2  | 30  | 0.409 | 3975 LIM homeobox 1                                                      |
| GO | one-carbon metabolic process              | 2  | 30  | 0.409 | 377677 carbonic anhydrase XIII                                           |
| GO | one-carbon metabolic process              | 2  | 30  | 0.409 | 767 carbonic anhydrase VIII                                              |
| GO | response to ionizing radiation            | 2  | 30  | 0.409 | 64782 apoptosis enhancing nuclease                                       |
| GO | response to ionizing radiation            | 2  | 30  | 0.409 | 672 breast cancer 1, early onset                                         |
| GO | negative regulation of transcription fact | 2  | 30  | 0.409 | 6672 SP100 nuclear antigen                                               |
| GO | negative regulation of transcription fact | 2  | 30  | 0.409 | 7341 SMT3 suppressor of mif two 3 homolog 1 ( <i>S. cerevisiae</i> )     |
| GO | nuclear speck                             | 6  | 111 | 0.412 | 10189 THO complex 4                                                      |
| GO | nuclear speck                             | 6  | 111 | 0.412 | 10465 peptidylprolyl isomerase H (cyclophilin H)                         |
| GO | nuclear speck                             | 6  | 111 | 0.412 | 56339 methyltransferase like 3                                           |
| GO | nuclear speck                             | 6  | 111 | 0.412 | 64318 nucleolar complex associated 3 homolog ( <i>S. cerevisiae</i> )    |
| GO | nuclear speck                             | 6  | 111 | 0.412 | 7341 SMT3 suppressor of mif two 3 homolog 1 ( <i>S. cerevisiae</i> )     |
| GO | nuclear speck                             | 6  | 111 | 0.412 | 7490 Wilms tumor 1                                                       |
| GO | spindle pole                              | 3  | 50  | 0.412 | 26586 cytoskeleton associated protein 2                                  |
| GO | spindle pole                              | 3  | 50  | 0.412 | 7840 Alstrom syndrome 1                                                  |
| GO | spindle pole                              | 3  | 50  | 0.412 | 93323 HAUS augmin-like complex, subunit 8                                |
| GO | hormone-mediated signaling pathway        | 3  | 50  | 0.412 | 2786 guanine nucleotide binding protein (G protein), gamma 4             |
| GO | hormone-mediated signaling pathway        | 3  | 50  | 0.412 | 54331 guanine nucleotide binding protein (G protein), gamma 2            |
| GO | hormone-mediated signaling pathway        | 3  | 50  | 0.412 | 59345 guanine nucleotide binding protein (G protein), beta polypeptide 4 |
| GO | sequence-specific DNA binding             | 24 | 487 | 0.412 | 1E+08 forkhead box O6                                                    |
| GO | sequence-specific DNA binding             | 24 | 487 | 0.412 | 1045 caudal type homeobox 2                                              |
| GO | sequence-specific DNA binding             | 24 | 487 | 0.412 | 139324 highly divergent homeobox                                         |
| GO | sequence-specific DNA binding             | 24 | 487 | 0.412 | 1746 distal-less homeobox 2                                              |
| GO | sequence-specific DNA binding             | 24 | 487 | 0.412 | 2305 forkhead box M1                                                     |
| GO | sequence-specific DNA binding             | 24 | 487 | 0.412 | 2736 GLI family zinc finger 2                                            |
| GO | sequence-specific DNA binding             | 24 | 487 | 0.412 | 3224 homeobox C8                                                         |
| GO | sequence-specific DNA binding             | 24 | 487 | 0.412 | 3236 homeobox D10                                                        |
| GO | sequence-specific DNA binding             | 24 | 487 | 0.412 | 3237 homeobox D11                                                        |

|    |                                           |    |     |       |        |                                                                               |
|----|-------------------------------------------|----|-----|-------|--------|-------------------------------------------------------------------------------|
| GO | sequence-specific DNA binding             | 24 | 487 | 0.412 | 344191 | even-skipped homeobox 2                                                       |
| GO | sequence-specific DNA binding             | 24 | 487 | 0.412 | 3975   | LIM homeobox 1                                                                |
| GO | sequence-specific DNA binding             | 24 | 487 | 0.412 | 4094   | v-maf musculoaponeurotic fibrosarcoma oncogene homolog (avian)                |
| GO | sequence-specific DNA binding             | 24 | 487 | 0.412 | 431707 | LIM homeobox 8                                                                |
| GO | sequence-specific DNA binding             | 24 | 487 | 0.412 | 5015   | orthodenticle homeobox 2                                                      |
| GO | sequence-specific DNA binding             | 24 | 487 | 0.412 | 5081   | paired box 7                                                                  |
| GO | sequence-specific DNA binding             | 24 | 487 | 0.412 | 56655  | polymerase (DNA-directed), epsilon 4 (p12 subunit)                            |
| GO | sequence-specific DNA binding             | 24 | 487 | 0.412 | 6474   | short stature homeobox 2                                                      |
| GO | sequence-specific DNA binding             | 24 | 487 | 0.412 | 6899   | T-box 1                                                                       |
| GO | sequence-specific DNA binding             | 24 | 487 | 0.412 | 7021   | transcription factor AP-2 beta (activating enhancer binding protein 2 beta)   |
| GO | sequence-specific DNA binding             | 24 | 487 | 0.412 | 7490   | Wilms tumor 1                                                                 |
| GO | sequence-specific DNA binding             | 24 | 487 | 0.412 | 80712  | ESX homeobox 1                                                                |
| GO | sequence-specific DNA binding             | 24 | 487 | 0.412 | 8626   | tumor protein p63                                                             |
| GO | sequence-specific DNA binding             | 24 | 487 | 0.412 | 9355   | LIM homeobox 2                                                                |
| GO | sequence-specific DNA binding             | 24 | 487 | 0.412 | 9839   | zinc finger E-box binding homeobox 2                                          |
| GO | induction of apoptosis by extracellular s | 5  | 91  | 0.416 | 26230  | T-cell lymphoma invasion and metastasis 2                                     |
| GO | induction of apoptosis by extracellular s | 5  | 91  | 0.416 | 355    | Fas (TNF receptor superfamily, member 6)                                      |
| GO | induction of apoptosis by extracellular s | 5  | 91  | 0.416 | 581    | BCL2-associated X protein                                                     |
| GO | induction of apoptosis by extracellular s | 5  | 91  | 0.416 | 5924   | Ras protein-specific guanine nucleotide-releasing factor 2                    |
| GO | induction of apoptosis by extracellular s | 5  | 91  | 0.416 | 8997   | kalirin, RhoGEF kinase                                                        |
| GO | protein complex                           | 8  | 153 | 0.417 | 1161   | excision repair cross-complementing rodent repair deficiency, complement      |
| GO | protein complex                           | 8  | 153 | 0.417 | 1643   | damage-specific DNA binding protein 2, 48kDa                                  |
| GO | protein complex                           | 8  | 153 | 0.417 | 309    | annexin A6                                                                    |
| GO | protein complex                           | 8  | 153 | 0.417 | 3516   | recombination signal binding protein for immunoglobulin kappa J region        |
| GO | protein complex                           | 8  | 153 | 0.417 | 6711   | spectrin, beta, non-erythrocytic 1                                            |
| GO | protein complex                           | 8  | 153 | 0.417 | 672    | breast cancer 1, early onset                                                  |
| GO | protein complex                           | 8  | 153 | 0.417 | 7220   | transient receptor potential cation channel, subfamily C, member 1            |
| GO | protein complex                           | 8  | 153 | 0.417 | 8626   | tumor protein p63                                                             |
| GO | axon guidance                             | 4  | 71  | 0.421 | 1002   | cadherin 4, type 1, R-cadherin (retinal)                                      |
| GO | axon guidance                             | 4  | 71  | 0.421 | 2736   | GLI family zinc finger 2                                                      |
| GO | axon guidance                             | 4  | 71  | 0.421 | 5015   | orthodenticle homeobox 2                                                      |
| GO | axon guidance                             | 4  | 71  | 0.421 | 6586   | slit homolog 3 (Drosophila)                                                   |
| GO | response to glucocorticoid stimulus       | 4  | 71  | 0.421 | 3557   | interleukin 1 receptor antagonist                                             |
| GO | response to glucocorticoid stimulus       | 4  | 71  | 0.421 | 5054   | serpin peptidase inhibitor, clade E (nexin, plasminogen activator inhibitor t |
| GO | response to glucocorticoid stimulus       | 4  | 71  | 0.421 | 590    | butyrylcholinesterase                                                         |
| GO | response to glucocorticoid stimulus       | 4  | 71  | 0.421 | 6347   | chemokine (C-C motif) ligand 2                                                |

|    |                                        |    |     |       |        |                                                                            |
|----|----------------------------------------|----|-----|-------|--------|----------------------------------------------------------------------------|
| GO | hemopoiesis                            | 3  | 51  | 0.424 | 182    | jagged 1 (Alagille syndrome)                                               |
| GO | hemopoiesis                            | 3  | 51  | 0.424 | 3932   | lymphocyte-specific protein tyrosine kinase                                |
| GO | hemopoiesis                            | 3  | 51  | 0.424 | 51218  | glutaredoxin 5                                                             |
| GO | heart morphogenesis                    | 2  | 31  | 0.425 | 10395  | deleted in liver cancer 1                                                  |
| GO | heart morphogenesis                    | 2  | 31  | 0.425 | 1289   | collagen, type V, alpha 1                                                  |
| GO | ligand-dependent nuclear receptor tran | 2  | 31  | 0.425 | 10474  | transcriptional adaptor 3                                                  |
| GO | ligand-dependent nuclear receptor tran | 2  | 31  | 0.425 | 5469   | mediator complex subunit 1                                                 |
| GO | exonuclease activity                   | 2  | 31  | 0.425 | 2237   | flap structure-specific endonuclease 1                                     |
| GO | exonuclease activity                   | 2  | 31  | 0.425 | 64782  | apoptosis enhancing nuclease                                               |
| GO | symporter activity                     | 6  | 113 | 0.429 | 201780 | solute carrier family 10 (sodium/bile acid cotransporter family), member 4 |
| GO | symporter activity                     | 6  | 113 | 0.429 | 387700 | solute carrier family 16, member 12 (monocarboxylic acid transporter 12)   |
| GO | symporter activity                     | 6  | 113 | 0.429 | 55117  | solute carrier family 6 (neutral amino acid transporter), member 15        |
| GO | symporter activity                     | 6  | 113 | 0.429 | 6527   | solute carrier family 5 (low affinity glucose cotransporter), member 4     |
| GO | symporter activity                     | 6  | 113 | 0.429 | 729025 | solute carrier family 15, member 5                                         |
| GO | symporter activity                     | 6  | 113 | 0.429 | 9497   | solute carrier family 4, sodium bicarbonate cotransporter, member 7        |
| GO | protein homodimerization activity      | 18 | 365 | 0.431 | 114088 | tripartite motif-containing 9                                              |
| GO | protein homodimerization activity      | 18 | 365 | 0.431 | 2027   | enolase 3 (beta, muscle)                                                   |
| GO | protein homodimerization activity      | 18 | 365 | 0.431 | 220    | aldehyde dehydrogenase 1 family, member A3                                 |
| GO | protein homodimerization activity      | 18 | 365 | 0.431 | 23171  | glycerol-3-phosphate dehydrogenase 1-like                                  |
| GO | protein homodimerization activity      | 18 | 365 | 0.431 | 23705  | cell adhesion molecule 1                                                   |
| GO | protein homodimerization activity      | 18 | 365 | 0.431 | 241    | arachidonate 5-lipoxygenase-activating protein                             |
| GO | protein homodimerization activity      | 18 | 365 | 0.431 | 2898   | glutamate receptor, ionotropic, kainate 2                                  |
| GO | protein homodimerization activity      | 18 | 365 | 0.431 | 3248   | hydroxyprostaglandin dehydrogenase 15-(NAD)                                |
| GO | protein homodimerization activity      | 18 | 365 | 0.431 | 332    | baculoviral IAP repeat-containing 5                                        |
| GO | protein homodimerization activity      | 18 | 365 | 0.431 | 348    | apolipoprotein E                                                           |
| GO | protein homodimerization activity      | 18 | 365 | 0.431 | 4436   | mutS homolog 2, colon cancer, nonpolyposis type 1 (E. coli)                |
| GO | protein homodimerization activity      | 18 | 365 | 0.431 | 5228   | placental growth factor                                                    |
| GO | protein homodimerization activity      | 18 | 365 | 0.431 | 5341   | pleckstrin                                                                 |
| GO | protein homodimerization activity      | 18 | 365 | 0.431 | 581    | BCL2-associated X protein                                                  |
| GO | protein homodimerization activity      | 18 | 365 | 0.431 | 6672   | SP100 nuclear antigen                                                      |
| GO | protein homodimerization activity      | 18 | 365 | 0.431 | 6899   | T-box 1                                                                    |
| GO | protein homodimerization activity      | 18 | 365 | 0.431 | 83851  | synaptotagmin XVI                                                          |
| GO | protein homodimerization activity      | 18 | 365 | 0.431 | 9540   | tumor protein p53 inducible protein 3                                      |
| GO | translation                            | 10 | 197 | 0.433 | 10056  | phenylalanyl-tRNA synthetase, beta subunit                                 |
| GO | translation                            | 10 | 197 | 0.433 | 11222  | mitochondrial ribosomal protein L3                                         |
| GO | translation                            | 10 | 197 | 0.433 | 1984   | eukaryotic translation initiation factor 5A                                |

|    |                                           |    |     |       |       |                                                                               |
|----|-------------------------------------------|----|-----|-------|-------|-------------------------------------------------------------------------------|
| GO | translation                               | 10 | 197 | 0.433 | 28998 | mitochondrial ribosomal protein L13                                           |
| GO | translation                               | 10 | 197 | 0.433 | 51023 | mitochondrial ribosomal protein S18C                                          |
| GO | translation                               | 10 | 197 | 0.433 | 6133  | ribosomal protein L9                                                          |
| GO | translation                               | 10 | 197 | 0.433 | 6154  | ribosomal protein L26                                                         |
| GO | translation                               | 10 | 197 | 0.433 | 6204  | ribosomal protein S10                                                         |
| GO | translation                               | 10 | 197 | 0.433 | 65003 | mitochondrial ribosomal protein L11                                           |
| GO | translation                               | 10 | 197 | 0.433 | 65008 | mitochondrial ribosomal protein L1                                            |
| GO | negative regulation of cyclin-dependent   | 1  | 12  | 0.435 | 1026  | cyclin-dependent kinase inhibitor 1A (p21, Cip1)                              |
| GO | STAGA complex                             | 1  | 12  | 0.435 | 10474 | transcriptional adaptor 3                                                     |
| GO | iron-sulfur cluster binding               | 1  | 12  | 0.435 | 10539 | glutaredoxin 3                                                                |
| GO | positive regulation of innate immune re   | 1  | 12  | 0.435 | 10622 | polymerase (RNA) III (DNA directed) polypeptide G (32kD)                      |
| GO | positive regulation of interferon-beta pr | 1  | 12  | 0.435 | 10622 | polymerase (RNA) III (DNA directed) polypeptide G (32kD)                      |
| GO | regulation of lipid metabolic process     | 1  | 12  | 0.435 | 12    | serpin peptidase inhibitor, clade A (alpha-1 antiproteinase, antitrypsin), me |
| GO | drug metabolic process                    | 1  | 12  | 0.435 | 1543  | cytochrome P450, family 1, subfamily A, polypeptide 1                         |
| GO | ephrin receptor activity                  | 1  | 12  | 0.435 | 2045  | EPH receptor A7                                                               |
| GO | positive regulation of calcium ion transp | 1  | 12  | 0.435 | 2149  | coagulation factor II (thrombin) receptor                                     |
| GO | positive regulation of caspase activity   | 1  | 12  | 0.435 | 2149  | coagulation factor II (thrombin) receptor                                     |
| GO | glutamate signaling pathway               | 1  | 12  | 0.435 | 2898  | glutamate receptor, ionotropic, kainate 2                                     |
| GO | estradiol 17-beta-dehydrogenase activit   | 1  | 12  | 0.435 | 3028  | hydroxysteroid (17-beta) dehydrogenase 10                                     |
| GO | protein methyltransferase activity        | 1  | 12  | 0.435 | 3276  | protein arginine methyltransferase 1                                          |
| GO | cholesterol transporter activity          | 1  | 12  | 0.435 | 348   | apolipoprotein E                                                              |
| GO | positive regulation of peptidyl-serine ph | 1  | 12  | 0.435 | 3589  | interleukin 11                                                                |
| GO | negative regulation of macrophage deri    | 1  | 12  | 0.435 | 3685  | integrin, alpha V (vitronectin receptor, alpha polypeptide, antigen CD51)     |
| GO | arylsulfatase activity                    | 1  | 12  | 0.435 | 411   | arylsulfatase B                                                               |
| GO | response to pH                            | 1  | 12  | 0.435 | 411   | arylsulfatase B                                                               |
| GO | DNA unwinding involved in replication     | 1  | 12  | 0.435 | 4171  | minichromosome maintenance complex component 2                                |
| GO | positive regulation of blood pressure     | 1  | 12  | 0.435 | 5021  | oxytocin receptor                                                             |
| GO | dorsal/ventral neural tube patterning     | 1  | 12  | 0.435 | 5081  | paired box 7                                                                  |
| GO | cGMP binding                              | 1  | 12  | 0.435 | 50940 | phosphodiesterase 11A                                                         |
| GO | lysosphingolipid and lysophosphatidic a   | 1  | 12  | 0.435 | 53637 | sphingosine-1-phosphate receptor 5                                            |
| GO | microvillus membrane                      | 1  | 12  | 0.435 | 5420  | podocalyxin-like                                                              |
| GO | protein serine/threonine phosphatase c    | 1  | 12  | 0.435 | 5494  | protein phosphatase, Mg <sup>2+</sup> /Mn <sup>2+</sup> dependent, 1A         |
| GO | acrosome reaction                         | 1  | 12  | 0.435 | 55521 | tripartite motif-containing 36                                                |
| GO | immunological synapse                     | 1  | 12  | 0.435 | 5588  | protein kinase C, theta                                                       |
| GO | voltage-gated sodium channel complex      | 1  | 12  | 0.435 | 6335  | sodium channel, voltage-gated, type IX, alpha subunit                         |
| GO | viral genome replication                  | 1  | 12  | 0.435 | 6347  | chemokine (C-C motif) ligand 2                                                |

|    |                                           |    |     |       |                                                                                   |
|----|-------------------------------------------|----|-----|-------|-----------------------------------------------------------------------------------|
| GO | retinoic acid receptor signaling pathway  | 1  | 12  | 0.435 | 6672 SP100 nuclear antigen                                                        |
| GO | response to copper ion                    | 1  | 12  | 0.435 | 7037 transferrin receptor (p90, CD71)                                             |
| GO | positive regulation of cellular componer  | 1  | 12  | 0.435 | 7046 transforming growth factor, beta receptor 1                                  |
| GO | positive regulation of survival gene proc | 1  | 12  | 0.435 | 7046 transforming growth factor, beta receptor 1                                  |
| GO | costamere                                 | 1  | 12  | 0.435 | 7220 transient receptor potential cation channel, subfamily C, member 1           |
| GO | neuromuscular synaptic transmission       | 1  | 12  | 0.435 | 773 calcium channel, voltage-dependent, P/Q type, alpha 1A subunit                |
| GO | endothelial cell migration                | 1  | 12  | 0.435 | 7857 secretogranin II (chromogranin C)                                            |
| GO | induction of positive chemotaxis          | 1  | 12  | 0.435 | 7857 secretogranin II (chromogranin C)                                            |
| GO | Golgi-associated vesicle                  | 1  | 12  | 0.435 | 79929 MAP6 domain containing 1                                                    |
| GO | regulation of phosphorylation             | 1  | 12  | 0.435 | 81706 protein phosphatase 1, regulatory (inhibitor) subunit 14C                   |
| GO | nBAF complex                              | 1  | 12  | 0.435 | 8193 D4, zinc and double PHD fingers family 1                                     |
| GO | histone acetylation                       | 1  | 12  | 0.435 | 8520 histone acetyltransferase 1                                                  |
| GO | keratinocyte proliferation                | 1  | 12  | 0.435 | 8626 tumor protein p63                                                            |
| GO | anion transmembrane transporter activ     | 1  | 12  | 0.435 | 9497 solute carrier family 4, sodium bicarbonate cotransporter, member 7          |
| GO | Rac GTPase binding                        | 1  | 12  | 0.435 | 9732 dedicator of cytokinesis 4                                                   |
| GO | calcium ion transport                     | 6  | 114 | 0.437 | 2534 FYN oncogene related to SRC, FGR, YES                                        |
| GO | calcium ion transport                     | 6  | 114 | 0.437 | 309 annexin A6                                                                    |
| GO | calcium ion transport                     | 6  | 114 | 0.437 | 54822 transient receptor potential cation channel, subfamily M, member 7          |
| GO | calcium ion transport                     | 6  | 114 | 0.437 | 6546 solute carrier family 8 (sodium/calcium exchanger), member 1                 |
| GO | calcium ion transport                     | 6  | 114 | 0.437 | 7220 transient receptor potential cation channel, subfamily C, member 1           |
| GO | calcium ion transport                     | 6  | 114 | 0.437 | 773 calcium channel, voltage-dependent, P/Q type, alpha 1A subunit                |
| GO | peptide binding                           | 2  | 32  | 0.442 | 347733 tubulin, beta 2B                                                           |
| GO | peptide binding                           | 2  | 32  | 0.442 | 5125 proprotein convertase subtilisin/kexin type 5                                |
| GO | carbohydrate transport                    | 2  | 32  | 0.442 | 6518 solute carrier family 2 (facilitated glucose/fructose transporter), member 5 |
| GO | carbohydrate transport                    | 2  | 32  | 0.442 | 6527 solute carrier family 5 (low affinity glucose cotransporter), member 4       |
| GO | mitosis                                   | 10 | 199 | 0.445 | 113130 cell division cycle associated 5                                           |
| GO | mitosis                                   | 10 | 199 | 0.445 | 220134 spindle and kinetochore associated complex subunit 1                       |
| GO | mitosis                                   | 10 | 199 | 0.445 | 332 baculoviral IAP repeat-containing 5                                           |
| GO | mitosis                                   | 10 | 199 | 0.445 | 347733 tubulin, beta 2B                                                           |
| GO | mitosis                                   | 10 | 199 | 0.445 | 55165 centrosomal protein 55kDa                                                   |
| GO | mitosis                                   | 10 | 199 | 0.445 | 64151 non-SMC condensin I complex, subunit G                                      |
| GO | mitosis                                   | 10 | 199 | 0.445 | 79187 fibronectin type III and SPRY domain containing 1                           |
| GO | mitosis                                   | 10 | 199 | 0.445 | 8091 high mobility group AT-hook 2                                                |
| GO | mitosis                                   | 10 | 199 | 0.445 | 890 cyclin A2                                                                     |
| GO | mitosis                                   | 10 | 199 | 0.445 | 93323 HAUS augmin-like complex, subunit 8                                         |
| GO | transcription from RNA polymerase II pr   | 9  | 178 | 0.446 | 1045 caudal type homeobox 2                                                       |



|    |                                           |   |     |       |                                                                                   |
|----|-------------------------------------------|---|-----|-------|-----------------------------------------------------------------------------------|
| GO | transcription from RNA polymerase II pr   | 9 | 178 | 0.446 | 11077 heat shock transcription factor 2 binding protein                           |
| GO | transcription from RNA polymerase II pr   | 9 | 178 | 0.446 | 2305 forkhead box M1                                                              |
| GO | transcription from RNA polymerase II pr   | 9 | 178 | 0.446 | 2965 general transcription factor IIH, polypeptide 1, 62kDa                       |
| GO | transcription from RNA polymerase II pr   | 9 | 178 | 0.446 | 409 arrestin, beta 2                                                              |
| GO | transcription from RNA polymerase II pr   | 9 | 178 | 0.446 | 4094 v-maf musculoaponeurotic fibrosarcoma oncogene homolog (avian)               |
| GO | transcription from RNA polymerase II pr   | 9 | 178 | 0.446 | 5440 polymerase (RNA) II (DNA directed) polypeptide K, 7.0kDa                     |
| GO | transcription from RNA polymerase II pr   | 9 | 178 | 0.446 | 659 bone morphogenetic protein receptor, type II (serine/threonine kinase)        |
| GO | transcription from RNA polymerase II pr   | 9 | 178 | 0.446 | 9242 musculin (activated B-cell factor-1)                                         |
| GO | ruffle                                    | 3 | 53  | 0.449 | 5420 podocalyxin-like                                                             |
| GO | ruffle                                    | 3 | 53  | 0.449 | 54822 transient receptor potential cation channel, subfamily M, member 7          |
| GO | ruffle                                    | 3 | 53  | 0.449 | 9260 PDZ and LIM domain 7 (enigma)                                                |
| GO | angiogenesis                              | 6 | 116 | 0.453 | 1282 collagen, type IV, alpha 1                                                   |
| GO | angiogenesis                              | 6 | 116 | 0.453 | 182 jagged 1 (Alagille syndrome)                                                  |
| GO | angiogenesis                              | 6 | 116 | 0.453 | 2321 fms-related tyrosine kinase 1 (vascular endothelial growth factor/vascular p |
| GO | angiogenesis                              | 6 | 116 | 0.453 | 5228 placental growth factor                                                      |
| GO | angiogenesis                              | 6 | 116 | 0.453 | 60675 prokineticin 2                                                              |
| GO | angiogenesis                              | 6 | 116 | 0.453 | 7857 secretogranin II (chromogranin C)                                            |
| GO | Rab GTPase binding                        | 2 | 33  | 0.457 | 1121 choroideremia (Rab escort protein 1)                                         |
| GO | Rab GTPase binding                        | 2 | 33  | 0.457 | 54843 synaptotagmin-like 2                                                        |
| GO | learning or memory                        | 2 | 33  | 0.457 | 29767 tropomodulin 2 (neuronal)                                                   |
| GO | learning or memory                        | 2 | 33  | 0.457 | 431707 LIM homeobox 8                                                             |
| GO | positive regulation of actin filament pol | 1 | 13  | 0.461 | 10096 ARP3 actin-related protein 3 homolog (yeast)                                |
| GO | bone mineralization                       | 1 | 13  | 0.461 | 10457 glycoprotein (transmembrane) nmb                                            |
| GO | transcription factor TFTC complex         | 1 | 13  | 0.461 | 10474 transcriptional adaptor 3                                                   |
| GO | spindle organization                      | 1 | 13  | 0.461 | 1164 CDC28 protein kinase regulatory subunit 2                                    |
| GO | extracellular matrix binding              | 1 | 13  | 0.461 | 1301 collagen, type XI, alpha 1                                                   |
| GO | autophagic vacuole membrane               | 1 | 13  | 0.461 | 157753 transmembrane protein 74                                                   |
| GO | myoblast differentiation                  | 1 | 13  | 0.461 | 182 jagged 1 (Alagille syndrome)                                                  |
| GO | T cell proliferation                      | 1 | 13  | 0.461 | 2281 FK506 binding protein 1B, 12.6 kDa                                           |
| GO | induction of an organ                     | 1 | 13  | 0.461 | 3237 homeobox D11                                                                 |
| GO | lipid homeostasis                         | 1 | 13  | 0.461 | 348 apolipoprotein E                                                              |
| GO | two-component sensor activity             | 1 | 13  | 0.461 | 3756 potassium voltage-gated channel, subfamily H (eag-related), member 1         |
| GO | calcium-activated potassium channel ac    | 1 | 13  | 0.461 | 3778 potassium large conductance calcium-activated channel, subfamily M, alph     |
| GO | response to osmotic stress                | 1 | 13  | 0.461 | 3778 potassium large conductance calcium-activated channel, subfamily M, alph     |
| GO | positive regulation of phosphoinositide   | 1 | 13  | 0.461 | 4734 neural precursor cell expressed, developmentally down-regulated 4            |
| GO | camera-type eye morphogenesis             | 1 | 13  | 0.461 | 4763 neurofibromin 1                                                              |

|    |                                           |    |     |       |        |                                                                     |
|----|-------------------------------------------|----|-----|-------|--------|---------------------------------------------------------------------|
| GO | positive regulation of hormone secretio   | 1  | 13  | 0.461 | 5028   | purinergic receptor P2Y, G-protein coupled, 1                       |
| GO | transcription from RNA polymerase III p   | 1  | 13  | 0.461 | 5440   | polymerase (RNA) II (DNA directed) polypeptide K, 7.0kDa            |
| GO | steroid hormone receptor signaling patf   | 1  | 13  | 0.461 | 5469   | mediator complex subunit 1                                          |
| GO | positive regulation of interleukin-2 bios | 1  | 13  | 0.461 | 5588   | protein kinase C, theta                                             |
| GO | histone deacetylase activity              | 1  | 13  | 0.461 | 6299   | sal-like 1 (Drosophila)                                             |
| GO | response to bacterium                     | 1  | 13  | 0.461 | 6347   | chemokine (C-C motif) ligand 2                                      |
| GO | syntaxin binding                          | 1  | 13  | 0.461 | 773    | calcium channel, voltage-dependent, P/Q type, alpha 1A subunit      |
| GO | negative regulation of microtubule depc   | 1  | 13  | 0.461 | 79929  | MAP6 domain containing 1                                            |
| GO | labyrinthine layer blood vessel developr  | 1  | 13  | 0.461 | 80712  | ESX homeobox 1                                                      |
| GO | low-density lipoprotein binding           | 1  | 13  | 0.461 | 81035  | collectin sub-family member 12                                      |
| GO | transcription elongation factor complex   | 1  | 13  | 0.461 | 8458   | transcription termination factor, RNA polymerase II                 |
| GO | insulin-like growth factor receptor bindi | 1  | 13  | 0.461 | 8835   | suppressor of cytokine signaling 2                                  |
| GO | muscle cell homeostasis                   | 1  | 13  | 0.461 | 9215   | like-glycosyltransferase                                            |
| GO | glial cell differentiation                | 1  | 13  | 0.461 | 92737  | delta/notch-like EGF repeat containing                              |
| GO | inorganic anion exchanger activity        | 1  | 13  | 0.461 | 9497   | solute carrier family 4, sodium bicarbonate cotransporter, member 7 |
| GO | cellular defense response                 | 3  | 54  | 0.461 | 51473  | doublecortin domain containing 2                                    |
| GO | cellular defense response                 | 3  | 54  | 0.461 | 729230 | chemokine (C-C motif) receptor 2                                    |
| GO | cellular defense response                 | 3  | 54  | 0.461 | 8712   | P antigen family, member 1 (prostate associated)                    |
| GO | microtubule organizing center             | 5  | 96  | 0.462 | 27241  | Bardet-Biedl syndrome 9                                             |
| GO | microtubule organizing center             | 5  | 96  | 0.462 | 28984  | chromosome 13 open reading frame 15                                 |
| GO | microtubule organizing center             | 5  | 96  | 0.462 | 6683   | spastin                                                             |
| GO | microtubule organizing center             | 5  | 96  | 0.462 | 79187  | fibronectin type III and SPRY domain containing 1                   |
| GO | microtubule organizing center             | 5  | 96  | 0.462 | 93323  | HAUS augmin-like complex, subunit 8                                 |
| GO | defense response to bacterium             | 4  | 75  | 0.462 | 245929 | defensin, beta 115                                                  |
| GO | defense response to bacterium             | 4  | 75  | 0.462 | 57817  | hepcidin antimicrobial peptide                                      |
| GO | defense response to bacterium             | 4  | 75  | 0.462 | 8349   | histone cluster 2, H2be                                             |
| GO | defense response to bacterium             | 4  | 75  | 0.462 | 8970   | histone cluster 1, H2bj                                             |
| GO | negative regulation of cell proliferation | 14 | 287 | 0.464 | 10202  | dehydrogenase/reductase (SDR family) member 2                       |
| GO | negative regulation of cell proliferation | 14 | 287 | 0.464 | 1026   | cyclin-dependent kinase inhibitor 1A (p21, Cip1)                    |
| GO | negative regulation of cell proliferation | 14 | 287 | 0.464 | 10395  | deleted in liver cancer 1                                           |
| GO | negative regulation of cell proliferation | 14 | 287 | 0.464 | 10457  | glycoprotein (transmembrane) nmb                                    |
| GO | negative regulation of cell proliferation | 14 | 287 | 0.464 | 2149   | coagulation factor II (thrombin) receptor                           |
| GO | negative regulation of cell proliferation | 14 | 287 | 0.464 | 2172   | fatty acid binding protein 6, ileal                                 |
| GO | negative regulation of cell proliferation | 14 | 287 | 0.464 | 27244  | sestrin 1                                                           |
| GO | negative regulation of cell proliferation | 14 | 287 | 0.464 | 3624   | inhibin, beta A                                                     |
| GO | negative regulation of cell proliferation | 14 | 287 | 0.464 | 4830   | non-metastatic cells 1, protein (NM23A) expressed in                |

|    |                                             |    |     |       |        |                                                                   |
|----|---------------------------------------------|----|-----|-------|--------|-------------------------------------------------------------------|
| GO | negative regulation of cell proliferation   | 14 | 287 | 0.464 | 5245   | prohibitin                                                        |
| GO | negative regulation of cell proliferation   | 14 | 287 | 0.464 | 54984  | PIN2-interacting protein 1                                        |
| GO | negative regulation of cell proliferation   | 14 | 287 | 0.464 | 5744   | parathyroid hormone-like hormone                                  |
| GO | negative regulation of cell proliferation   | 14 | 287 | 0.464 | 6586   | slit homolog 3 (Drosophila)                                       |
| GO | negative regulation of cell proliferation   | 14 | 287 | 0.464 | 7490   | Wilms tumor 1                                                     |
| GO | G-protein coupled receptor activity         | 17 | 352 | 0.47  | 2149   | coagulation factor II (thrombin) receptor                         |
| GO | G-protein coupled receptor activity         | 17 | 352 | 0.47  | 2150   | coagulation factor II (thrombin) receptor-like 1                  |
| GO | G-protein coupled receptor activity         | 17 | 352 | 0.47  | 2151   | coagulation factor II (thrombin) receptor-like 2                  |
| GO | G-protein coupled receptor activity         | 17 | 352 | 0.47  | 222611 | G protein-coupled receptor 111                                    |
| GO | G-protein coupled receptor activity         | 17 | 352 | 0.47  | 23432  | G protein-coupled receptor 161                                    |
| GO | G-protein coupled receptor activity         | 17 | 352 | 0.47  | 2842   | G protein-coupled receptor 19                                     |
| GO | G-protein coupled receptor activity         | 17 | 352 | 0.47  | 2845   | G protein-coupled receptor 22                                     |
| GO | G-protein coupled receptor activity         | 17 | 352 | 0.47  | 2850   | G protein-coupled receptor 27                                     |
| GO | G-protein coupled receptor activity         | 17 | 352 | 0.47  | 2863   | G protein-coupled receptor 39                                     |
| GO | G-protein coupled receptor activity         | 17 | 352 | 0.47  | 4158   | melanocortin 2 receptor (adrenocorticotrophic hormone)            |
| GO | G-protein coupled receptor activity         | 17 | 352 | 0.47  | 5021   | oxytocin receptor                                                 |
| GO | G-protein coupled receptor activity         | 17 | 352 | 0.47  | 5028   | purinergic receptor P2Y, G-protein coupled, 1                     |
| GO | G-protein coupled receptor activity         | 17 | 352 | 0.47  | 5031   | pyrimidinergic receptor P2Y, G-protein coupled, 6                 |
| GO | G-protein coupled receptor activity         | 17 | 352 | 0.47  | 53637  | sphingosine-1-phosphate receptor 5                                |
| GO | G-protein coupled receptor activity         | 17 | 352 | 0.47  | 729230 | chemokine (C-C motif) receptor 2                                  |
| GO | G-protein coupled receptor activity         | 17 | 352 | 0.47  | 8325   | frizzled homolog 8 (Drosophila)                                   |
| GO | G-protein coupled receptor activity         | 17 | 352 | 0.47  | 9568   | gamma-aminobutyric acid (GABA) B receptor, 2                      |
| GO | lyase activity                              | 5  | 97  | 0.471 | 158    | adenylosuccinate lyase                                            |
| GO | lyase activity                              | 5  | 97  | 0.471 | 2027   | enolase 3 (beta, muscle)                                          |
| GO | lyase activity                              | 5  | 97  | 0.471 | 377677 | carbonic anhydrase XIII                                           |
| GO | lyase activity                              | 5  | 97  | 0.471 | 4968   | 8-oxoguanine DNA glycosylase                                      |
| GO | lyase activity                              | 5  | 97  | 0.471 | 7389   | uroporphyrinogen decarboxylase                                    |
| GO | extrinsic to membrane                       | 2  | 34  | 0.473 | 2037   | erythrocyte membrane protein band 4.1-like 2                      |
| GO | extrinsic to membrane                       | 2  | 34  | 0.473 | 23136  | erythrocyte membrane protein band 4.1-like 3                      |
| GO | presynaptic membrane                        | 2  | 34  | 0.473 | 26059  | ELKS/RAB6-interacting/CAST family member 2                        |
| GO | presynaptic membrane                        | 2  | 34  | 0.473 | 2898   | glutamate receptor, ionotropic, kainate 2                         |
| GO | B cell differentiation                      | 2  | 34  | 0.473 | 3589   | interleukin 11                                                    |
| GO | B cell differentiation                      | 2  | 34  | 0.473 | 4436   | mutS homolog 2, colon cancer, nonpolyposis type 1 (E. coli)       |
| GO | acid-amino acid ligase activity             | 2  | 34  | 0.473 | 4734   | neural precursor cell expressed, developmentally down-regulated 4 |
| GO | acid-amino acid ligase activity             | 2  | 34  | 0.473 | 51191  | hect domain and RLD 5                                             |
| GO | positive regulation of epithelial cell prol | 2  | 34  | 0.473 | 4830   | non-metastatic cells 1, protein (NM23A) expressed in              |

|    |                                              |   |    |       |        |                                                                        |
|----|----------------------------------------------|---|----|-------|--------|------------------------------------------------------------------------|
| GO | positive regulation of epithelial cell prol  | 2 | 34 | 0.473 | 9420   | cytochrome P450, family 7, subfamily B, polypeptide 1                  |
| GO | humoral immune response                      | 2 | 34 | 0.473 | 54210  | triggering receptor expressed on myeloid cells 1                       |
| GO | humoral immune response                      | 2 | 34 | 0.473 | 6347   | chemokine (C-C motif) ligand 2                                         |
| GO | cell-cell junction                           | 3 | 56 | 0.486 | 1000   | cadherin 2, type 1, N-cadherin (neuronal)                              |
| GO | cell-cell junction                           | 3 | 56 | 0.486 | 23136  | erythrocyte membrane protein band 4.1-like 3                           |
| GO | cell-cell junction                           | 3 | 56 | 0.486 | 23705  | cell adhesion molecule 1                                               |
| GO | proteasome complex                           | 3 | 56 | 0.486 | 10213  | proteasome (prosome, macropain) 26S subunit, non-ATPase, 14            |
| GO | proteasome complex                           | 3 | 56 | 0.486 | 5702   | proteasome (prosome, macropain) 26S subunit, ATPase, 3                 |
| GO | proteasome complex                           | 3 | 56 | 0.486 | 5717   | proteasome (prosome, macropain) 26S subunit, non-ATPase, 11            |
| GO | condensed chromosome kinetochore             | 3 | 56 | 0.486 | 54984  | PIN2-interacting protein 1                                             |
| GO | condensed chromosome kinetochore             | 3 | 56 | 0.486 | 79172  | centromere protein O                                                   |
| GO | condensed chromosome kinetochore             | 3 | 56 | 0.486 | 79682  | MLF1 interacting protein                                               |
| GO | glutamine metabolic process                  | 1 | 14 | 0.486 | 1503   | CTP synthase                                                           |
| GO | nuclear heterochromatin                      | 1 | 14 | 0.486 | 1788   | DNA (cytosine-5-)-methyltransferase 3 alpha                            |
| GO | protein export from nucleus                  | 1 | 14 | 0.486 | 1984   | eukaryotic translation initiation factor 5A                            |
| GO | neuroblast proliferation                     | 1 | 14 | 0.486 | 23305  | acyl-CoA synthetase long-chain family member 6                         |
| GO | positive regulation of natural killer cell r | 1 | 14 | 0.486 | 23705  | cell adhesion molecule 1                                               |
| GO | hindbrain development                        | 1 | 14 | 0.486 | 2736   | GLI family zinc finger 2                                               |
| GO | tropomyosin binding                          | 1 | 14 | 0.486 | 29767  | tropomodulin 2 (neuronal)                                              |
| GO | nitric oxide mediated signal transductio     | 1 | 14 | 0.486 | 348    | apolipoprotein E                                                       |
| GO | regulation of neuronal synaptic plasticit    | 1 | 14 | 0.486 | 348    | apolipoprotein E                                                       |
| GO | regulation of action potential               | 1 | 14 | 0.486 | 3751   | potassium voltage-gated channel, Shal-related subfamily, member 2      |
| GO | rhythmic process                             | 1 | 14 | 0.486 | 402055 | SRR1 domain containing                                                 |
| GO | sensory perception                           | 1 | 14 | 0.486 | 409    | arrestin, beta 2                                                       |
| GO | positive regulation of protein catabolic p   | 1 | 14 | 0.486 | 4734   | neural precursor cell expressed, developmentally down-regulated 4      |
| GO | embryonic heart tube development             | 1 | 14 | 0.486 | 5469   | mediator complex subunit 1                                             |
| GO | neurotransmitter:sodium symporter act        | 1 | 14 | 0.486 | 55117  | solute carrier family 6 (neutral amino acid transporter), member 15    |
| GO | membrane protein ectodomain proteol          | 1 | 14 | 0.486 | 5588   | protein kinase C, theta                                                |
| GO | positive regulation of protein secretion     | 1 | 14 | 0.486 | 5588   | protein kinase C, theta                                                |
| GO | protein kinase C activity                    | 1 | 14 | 0.486 | 5588   | protein kinase C, theta                                                |
| GO | regulation of vasoconstriction               | 1 | 14 | 0.486 | 5588   | protein kinase C, theta                                                |
| GO | NuRD complex                                 | 1 | 14 | 0.486 | 6299   | sal-like 1 (Drosophila)                                                |
| GO | chromosome organization                      | 1 | 14 | 0.486 | 641    | Bloom syndrome, RecQ helicase-like                                     |
| GO | response to ATP                              | 1 | 14 | 0.486 | 6546   | solute carrier family 8 (sodium/calcium exchanger), member 1           |
| GO | solute:hydrogen antiporter activity          | 1 | 14 | 0.486 | 6549   | solute carrier family 9 (sodium/hydrogen exchanger), member 2          |
| GO | cellular response to starvation              | 1 | 14 | 0.486 | 659    | bone morphogenetic protein receptor, type II (serine/threonine kinase) |

|    |                                              |    |      |       |                                                                         |
|----|----------------------------------------------|----|------|-------|-------------------------------------------------------------------------|
| GO | eye development                              | 1  | 14   | 0.486 | 6657 SRY (sex determining region Y)-box 2                               |
| GO | response to interferon-gamma                 | 1  | 14   | 0.486 | 6672 SP100 nuclear antigen                                              |
| GO | pathway-restricted SMAD protein phosphatase  | 1  | 14   | 0.486 | 7046 transforming growth factor, beta receptor 1                        |
| GO | calmodulin-dependent protein kinase activity | 1  | 14   | 0.486 | 8536 calcium/calmodulin-dependent protein kinase I                      |
| GO | mitochondrion                                | 56 | 1193 | 0.487 | 10202 dehydrogenase/reductase (SDR family) member 2                     |
| GO | mitochondrion                                | 56 | 1193 | 0.487 | 11022 tudor and KH domain containing                                    |
| GO | mitochondrion                                | 56 | 1193 | 0.487 | 11222 mitochondrial ribosomal protein L3                                |
| GO | mitochondrion                                | 56 | 1193 | 0.487 | 122786 FERM domain containing 6                                         |
| GO | mitochondrion                                | 56 | 1193 | 0.487 | 132158 glycerate kinase                                                 |
| GO | mitochondrion                                | 56 | 1193 | 0.487 | 1543 cytochrome P450, family 1, subfamily A, polypeptide 1              |
| GO | mitochondrion                                | 56 | 1193 | 0.487 | 154791 chromosome 7 open reading frame 55                               |
| GO | mitochondrion                                | 56 | 1193 | 0.487 | 1716 deoxyguanosine kinase                                              |
| GO | mitochondrion                                | 56 | 1193 | 0.487 | 1763 DNA replication helicase 2 homolog (yeast)                         |
| GO | mitochondrion                                | 56 | 1193 | 0.487 | 2232 ferredoxin reductase                                               |
| GO | mitochondrion                                | 56 | 1193 | 0.487 | 2237 flap structure-specific endonuclease 1                             |
| GO | mitochondrion                                | 56 | 1193 | 0.487 | 22868 FAST kinase domains 2                                             |
| GO | mitochondrion                                | 56 | 1193 | 0.487 | 23305 acyl-CoA synthetase long-chain family member 6                    |
| GO | mitochondrion                                | 56 | 1193 | 0.487 | 23590 prenyl (decaprenyl) diphosphate synthase, subunit 1               |
| GO | mitochondrion                                | 56 | 1193 | 0.487 | 255027 MPV17 mitochondrial membrane protein-like                        |
| GO | mitochondrion                                | 56 | 1193 | 0.487 | 25884 chordin-like 2                                                    |
| GO | mitochondrion                                | 56 | 1193 | 0.487 | 25953 paroxysmal nonkinesigenic dyskinesia                              |
| GO | mitochondrion                                | 56 | 1193 | 0.487 | 26275 3-hydroxyisobutyryl-Coenzyme A hydrolase                          |
| GO | mitochondrion                                | 56 | 1193 | 0.487 | 2628 glycine amidinotransferase (L-arginine:glycine amidinotransferase) |
| GO | mitochondrion                                | 56 | 1193 | 0.487 | 26519 translocase of inner mitochondrial membrane 10 homolog (yeast)    |
| GO | mitochondrion                                | 56 | 1193 | 0.487 | 26521 translocase of inner mitochondrial membrane 8 homolog B (yeast)   |
| GO | mitochondrion                                | 56 | 1193 | 0.487 | 2653 glycine cleavage system protein H (aminomethyl carrier)            |
| GO | mitochondrion                                | 56 | 1193 | 0.487 | 27429 HtrA serine peptidase 2                                           |
| GO | mitochondrion                                | 56 | 1193 | 0.487 | 284184 chromosome 17 open reading frame 89                              |
| GO | mitochondrion                                | 56 | 1193 | 0.487 | 28998 mitochondrial ribosomal protein L13                               |
| GO | mitochondrion                                | 56 | 1193 | 0.487 | 3028 hydroxysteroid (17-beta) dehydrogenase 10                          |
| GO | mitochondrion                                | 56 | 1193 | 0.487 | 3336 heat shock 10kDa protein 1 (chaperonin 10)                         |
| GO | mitochondrion                                | 56 | 1193 | 0.487 | 411 arylsulfatase B                                                     |
| GO | mitochondrion                                | 56 | 1193 | 0.487 | 4709 NADH dehydrogenase (ubiquinone) 1 beta subcomplex, 3, 12kDa        |
| GO | mitochondrion                                | 56 | 1193 | 0.487 | 4830 non-metastatic cells 1, protein (NM23A) expressed in               |
| GO | mitochondrion                                | 56 | 1193 | 0.487 | 4968 8-oxoguanine DNA glycosylase                                       |
| GO | mitochondrion                                | 56 | 1193 | 0.487 | 5028 purinergic receptor P2Y, G-protein coupled, 1                      |

|    |                                    |    |      |       |       |                                                                                             |
|----|------------------------------------|----|------|-------|-------|---------------------------------------------------------------------------------------------|
| GO | mitochondrion                      | 56 | 1193 | 0.487 | 51023 | mitochondrial ribosomal protein S18C                                                        |
| GO | mitochondrion                      | 56 | 1193 | 0.487 | 51218 | glutaredoxin 5                                                                              |
| GO | mitochondrion                      | 56 | 1193 | 0.487 | 51499 | TP53 regulated inhibitor of apoptosis 1                                                     |
| GO | mitochondrion                      | 56 | 1193 | 0.487 | 516   | ATP synthase, H <sup>+</sup> transporting, mitochondrial F0 complex, subunit C1 (subunit c) |
| GO | mitochondrion                      | 56 | 1193 | 0.487 | 5245  | prohibitin                                                                                  |
| GO | mitochondrion                      | 56 | 1193 | 0.487 | 5303  | protein (peptidylprolyl cis/trans isomerase) NIMA-interacting, 4 (parvulin)                 |
| GO | mitochondrion                      | 56 | 1193 | 0.487 | 54534 | mitochondrial ribosomal protein L50                                                         |
| GO | mitochondrion                      | 56 | 1193 | 0.487 | 57144 | p21 protein (Cdc42/Rac)-activated kinase 7                                                  |
| GO | mitochondrion                      | 56 | 1193 | 0.487 | 57678 | glycerol-3-phosphate acyltransferase, mitochondrial                                         |
| GO | mitochondrion                      | 56 | 1193 | 0.487 | 581   | BCL2-associated X protein                                                                   |
| GO | mitochondrion                      | 56 | 1193 | 0.487 | 586   | branched chain aminotransferase 1, cytosolic                                                |
| GO | mitochondrion                      | 56 | 1193 | 0.487 | 60386 | solute carrier family 25 (mitochondrial thiamine pyrophosphate carrier), member 1           |
| GO | mitochondrion                      | 56 | 1193 | 0.487 | 60492 | coiled-coil domain containing 90B                                                           |
| GO | mitochondrion                      | 56 | 1193 | 0.487 | 65003 | mitochondrial ribosomal protein L11                                                         |
| GO | mitochondrion                      | 56 | 1193 | 0.487 | 65008 | mitochondrial ribosomal protein L1                                                          |
| GO | mitochondrion                      | 56 | 1193 | 0.487 | 65055 | receptor accessory protein 1                                                                |
| GO | mitochondrion                      | 56 | 1193 | 0.487 | 6586  | slit homolog 3 (Drosophila)                                                                 |
| GO | mitochondrion                      | 56 | 1193 | 0.487 | 7037  | transferrin receptor (p90, CD71)                                                            |
| GO | mitochondrion                      | 56 | 1193 | 0.487 | 79071 | ELOVL family member 6, elongation of long chain fatty acids (FEN1/Elo2, SLC7A5)             |
| GO | mitochondrion                      | 56 | 1193 | 0.487 | 79814 | agmatine ureohydrolase (agmatinase)                                                         |
| GO | mitochondrion                      | 56 | 1193 | 0.487 | 81892 | chromosome 14 open reading frame 156                                                        |
| GO | mitochondrion                      | 56 | 1193 | 0.487 | 8604  | solute carrier family 25 (mitochondrial carrier, Aralar), member 12                         |
| GO | mitochondrion                      | 56 | 1193 | 0.487 | 8659  | aldehyde dehydrogenase 4 family, member A1                                                  |
| GO | mitochondrion                      | 56 | 1193 | 0.487 | 91942 | NADH dehydrogenase (ubiquinone) 1 alpha subcomplex, assembly factor 2                       |
| GO | acute-phase response               | 2  | 35   | 0.488 | 12    | serpin peptidase inhibitor, clade A (alpha-1 antitrypsin), member 1                         |
| GO | acute-phase response               | 2  | 35   | 0.488 | 7037  | transferrin receptor (p90, CD71)                                                            |
| GO | embryonic limb morphogenesis       | 2  | 35   | 0.488 | 3236  | homeobox D10                                                                                |
| GO | embryonic limb morphogenesis       | 2  | 35   | 0.488 | 8626  | tumor protein p63                                                                           |
| GO | centriole                          | 2  | 35   | 0.488 | 332   | baculoviral IAP repeat-containing 5                                                         |
| GO | centriole                          | 2  | 35   | 0.488 | 55165 | centrosomal protein 55kDa                                                                   |
| GO | transcription corepressor activity | 7  | 142  | 0.491 | 1045  | caudal type homeobox 2                                                                      |
| GO | transcription corepressor activity | 7  | 142  | 0.491 | 11278 | Kruppel-like factor 12                                                                      |
| GO | transcription corepressor activity | 7  | 142  | 0.491 | 29842 | transcription factor CP2-like 1                                                             |
| GO | transcription corepressor activity | 7  | 142  | 0.491 | 29995 | LIM and cysteine-rich domains 1                                                             |
| GO | transcription corepressor activity | 7  | 142  | 0.491 | 5702  | proteasome (prosome, macropain) 26S subunit, ATPase, 3                                      |
| GO | transcription corepressor activity | 7  | 142  | 0.491 | 6672  | SP100 nuclear antigen                                                                       |

|    |                                    |    |      |       |        |                                                                               |
|----|------------------------------------|----|------|-------|--------|-------------------------------------------------------------------------------|
| GO | transcription corepressor activity | 7  | 142  | 0.491 | 9242   | musculin (activated B-cell factor-1)                                          |
| GO | locomotory behavior                | 3  | 57   | 0.497 | 1136   | cholinergic receptor, nicotinic, alpha 3                                      |
| GO | locomotory behavior                | 3  | 57   | 0.497 | 55084  | sine oculis binding protein homolog (Drosophila)                              |
| GO | locomotory behavior                | 3  | 57   | 0.497 | 55283  | mucolipin 3                                                                   |
| GO | DNA binding                        | 65 | 1392 | 0.501 | 11169  | WD repeat and HMG-box DNA binding protein 1                                   |
| GO | DNA binding                        | 65 | 1392 | 0.501 | 11278  | Kruppel-like factor 12                                                        |
| GO | DNA binding                        | 65 | 1392 | 0.501 | 12     | serpin peptidase inhibitor, clade A (alpha-1 antiproteinase, antitrypsin), me |
| GO | DNA binding                        | 65 | 1392 | 0.501 | 148213 | zinc finger protein 681                                                       |
| GO | DNA binding                        | 65 | 1392 | 0.501 | 1643   | damage-specific DNA binding protein 2, 48kDa                                  |
| GO | DNA binding                        | 65 | 1392 | 0.501 | 170082 | transcription elongation factor A (SII) N-terminal and central domain contai  |
| GO | DNA binding                        | 65 | 1392 | 0.501 | 1763   | DNA replication helicase 2 homolog (yeast)                                    |
| GO | DNA binding                        | 65 | 1392 | 0.501 | 1775   | deoxyribonuclease I-like 2                                                    |
| GO | DNA binding                        | 65 | 1392 | 0.501 | 1787   | tRNA aspartic acid methyltransferase 1                                        |
| GO | DNA binding                        | 65 | 1392 | 0.501 | 1788   | DNA (cytosine-5-)-methyltransferase 3 alpha                                   |
| GO | DNA binding                        | 65 | 1392 | 0.501 | 201299 | RAD52 motif 1                                                                 |
| GO | DNA binding                        | 65 | 1392 | 0.501 | 219736 | storkhead box 1                                                               |
| GO | DNA binding                        | 65 | 1392 | 0.501 | 2237   | flap structure-specific endonuclease 1                                        |
| GO | DNA binding                        | 65 | 1392 | 0.501 | 2305   | forkhead box M1                                                               |
| GO | DNA binding                        | 65 | 1392 | 0.501 | 23594  | origin recognition complex, subunit 6 like (yeast)                            |
| GO | DNA binding                        | 65 | 1392 | 0.501 | 25885  | polymerase (RNA) I polypeptide A, 194kDa                                      |
| GO | DNA binding                        | 65 | 1392 | 0.501 | 284443 | zinc finger protein 493                                                       |
| GO | DNA binding                        | 65 | 1392 | 0.501 | 29893  | PSMC3 interacting protein                                                     |
| GO | DNA binding                        | 65 | 1392 | 0.501 | 344191 | even-skipped homeobox 2                                                       |
| GO | DNA binding                        | 65 | 1392 | 0.501 | 3516   | recombination signal binding protein for immunoglobulin kappa J region        |
| GO | DNA binding                        | 65 | 1392 | 0.501 | 387103 | centromere protein W                                                          |
| GO | DNA binding                        | 65 | 1392 | 0.501 | 389421 | lin-28 homolog B (C. elegans)                                                 |
| GO | DNA binding                        | 65 | 1392 | 0.501 | 406    | aryl hydrocarbon receptor nuclear translocator-like                           |
| GO | DNA binding                        | 65 | 1392 | 0.501 | 4171   | minichromosome maintenance complex component 2                                |
| GO | DNA binding                        | 65 | 1392 | 0.501 | 4291   | myeloid leukemia factor 1                                                     |
| GO | DNA binding                        | 65 | 1392 | 0.501 | 4436   | mutS homolog 2, colon cancer, nonpolyposis type 1 (E. coli)                   |
| GO | DNA binding                        | 65 | 1392 | 0.501 | 4603   | v-myb myeloblastosis viral oncogene homolog (avian)-like 1                    |
| GO | DNA binding                        | 65 | 1392 | 0.501 | 5000   | origin recognition complex, subunit 4-like (yeast)                            |
| GO | DNA binding                        | 65 | 1392 | 0.501 | 50485  | SWI/SNF related, matrix associated, actin dependent regulator of chromati     |
| GO | DNA binding                        | 65 | 1392 | 0.501 | 5303   | protein (peptidylprolyl cis/trans isomerase) NIMA-interacting, 4 (parvulin)   |
| GO | DNA binding                        | 65 | 1392 | 0.501 | 5378   | PMS1 postmeiotic segregation increased 1 (S. cerevisiae)                      |
| GO | DNA binding                        | 65 | 1392 | 0.501 | 5440   | polymerase (RNA) II (DNA directed) polypeptide K, 7.0kDa                      |

|    |                      |    |      |       |       |                                                                             |
|----|----------------------|----|------|-------|-------|-----------------------------------------------------------------------------|
| GO | DNA binding          | 65 | 1392 | 0.501 | 5469  | mediator complex subunit 1                                                  |
| GO | DNA binding          | 65 | 1392 | 0.501 | 54796 | basonuclin 2                                                                |
| GO | DNA binding          | 65 | 1392 | 0.501 | 55506 | H2A histone family, member Y2                                               |
| GO | DNA binding          | 65 | 1392 | 0.501 | 5558  | primase, DNA, polypeptide 2 (58kDa)                                         |
| GO | DNA binding          | 65 | 1392 | 0.501 | 58499 | zinc finger protein 462                                                     |
| GO | DNA binding          | 65 | 1392 | 0.501 | 5889  | RAD51 homolog C ( <i>S. cerevisiae</i> )                                    |
| GO | DNA binding          | 65 | 1392 | 0.501 | 59336 | PR domain containing 13                                                     |
| GO | DNA binding          | 65 | 1392 | 0.501 | 5965  | RecQ protein-like (DNA helicase Q1-like)                                    |
| GO | DNA binding          | 65 | 1392 | 0.501 | 6299  | sal-like 1 ( <i>Drosophila</i> )                                            |
| GO | DNA binding          | 65 | 1392 | 0.501 | 641   | Bloom syndrome, RecQ helicase-like                                          |
| GO | DNA binding          | 65 | 1392 | 0.501 | 6591  | snail homolog 2 ( <i>Drosophila</i> )                                       |
| GO | DNA binding          | 65 | 1392 | 0.501 | 6615  | snail homolog 1 ( <i>Drosophila</i> )                                       |
| GO | DNA binding          | 65 | 1392 | 0.501 | 6657  | SRY (sex determining region Y)-box 2                                        |
| GO | DNA binding          | 65 | 1392 | 0.501 | 6672  | SP100 nuclear antigen                                                       |
| GO | DNA binding          | 65 | 1392 | 0.501 | 672   | breast cancer 1, early onset                                                |
| GO | DNA binding          | 65 | 1392 | 0.501 | 7021  | transcription factor AP-2 beta (activating enhancer binding protein 2 beta) |
| GO | DNA binding          | 65 | 1392 | 0.501 | 7029  | transcription factor Dp-2 (E2F dimerization partner 2)                      |
| GO | DNA binding          | 65 | 1392 | 0.501 | 7552  | zinc finger protein 711                                                     |
| GO | DNA binding          | 65 | 1392 | 0.501 | 79075 | defective in sister chromatid cohesion 1 homolog ( <i>S. cerevisiae</i> )   |
| GO | DNA binding          | 65 | 1392 | 0.501 | 79698 | zinc finger, matrin type 4                                                  |
| GO | DNA binding          | 65 | 1392 | 0.501 | 8091  | high mobility group AT-hook 2                                               |
| GO | DNA binding          | 65 | 1392 | 0.501 | 8348  | histone cluster 1, H2bo                                                     |
| GO | DNA binding          | 65 | 1392 | 0.501 | 8349  | histone cluster 2, H2be                                                     |
| GO | DNA binding          | 65 | 1392 | 0.501 | 84083 | zinc finger, RAN-binding domain containing 3                                |
| GO | DNA binding          | 65 | 1392 | 0.501 | 84172 | polymerase (RNA) I polypeptide B, 128kDa                                    |
| GO | DNA binding          | 65 | 1392 | 0.501 | 8458  | transcription termination factor, RNA polymerase II                         |
| GO | DNA binding          | 65 | 1392 | 0.501 | 84622 | zinc finger protein 594                                                     |
| GO | DNA binding          | 65 | 1392 | 0.501 | 84878 | zinc finger and BTB domain containing 45                                    |
| GO | DNA binding          | 65 | 1392 | 0.501 | 8626  | tumor protein p63                                                           |
| GO | DNA binding          | 65 | 1392 | 0.501 | 8970  | histone cluster 1, H2bj                                                     |
| GO | DNA binding          | 65 | 1392 | 0.501 | 91442 | chromosome 19 open reading frame 40                                         |
| GO | DNA binding          | 65 | 1392 | 0.501 | 91975 | zinc finger protein 300                                                     |
| GO | DNA binding          | 65 | 1392 | 0.501 | 93474 | zinc finger protein 670                                                     |
| GO | postsynaptic density | 4  | 79   | 0.503 | 1136  | cholinergic receptor, nicotinic, alpha 3                                    |
| GO | postsynaptic density | 4  | 79   | 0.503 | 3751  | potassium voltage-gated channel, Shal-related subfamily, member 2           |
| GO | postsynaptic density | 4  | 79   | 0.503 | 8777  | multiple PDZ domain protein                                                 |



|    |                                           |   |     |       |        |                                                                          |
|----|-------------------------------------------|---|-----|-------|--------|--------------------------------------------------------------------------|
| GO | postsynaptic density                      | 4 | 79  | 0.503 | 9455   | homer homolog 2 (Drosophila)                                             |
| GO | protein amino acid autophosphorylator     | 4 | 79  | 0.503 | 2534   | FYN oncogene related to SRC, FGR, YES                                    |
| GO | protein amino acid autophosphorylator     | 4 | 79  | 0.503 | 54822  | transient receptor potential cation channel, subfamily M, member 7       |
| GO | protein amino acid autophosphorylator     | 4 | 79  | 0.503 | 7046   | transforming growth factor, beta receptor 1                              |
| GO | protein amino acid autophosphorylator     | 4 | 79  | 0.503 | 84206  | mex-3 homolog B (C. elegans)                                             |
| GO | Rho protein signal transduction           | 2 | 36  | 0.503 | 10672  | guanine nucleotide binding protein (G protein), alpha 13                 |
| GO | Rho protein signal transduction           | 2 | 36  | 0.503 | 6242   | rhotekin                                                                 |
| GO | autophagy                                 | 2 | 36  | 0.503 | 157753 | transmembrane protein 74                                                 |
| GO | autophagy                                 | 2 | 36  | 0.503 | 411    | arylsulfatase B                                                          |
| GO | microtubule basal body                    | 2 | 36  | 0.503 | 57560  | intraflagellar transport 80 homolog (Chlamydomonas)                      |
| GO | microtubule basal body                    | 2 | 36  | 0.503 | 7840   | Alstrom syndrome 1                                                       |
| GO | response to oxidative stress              | 5 | 101 | 0.507 | 114757 | cytoglobin                                                               |
| GO | response to oxidative stress              | 5 | 101 | 0.507 | 1161   | excision repair cross-complementing rodent repair deficiency, complement |
| GO | response to oxidative stress              | 5 | 101 | 0.507 | 2628   | glycine amidinotransferase (L-arginine:glycine amidinotransferase)       |
| GO | response to oxidative stress              | 5 | 101 | 0.507 | 2878   | glutathione peroxidase 3 (plasma)                                        |
| GO | response to oxidative stress              | 5 | 101 | 0.507 | 7171   | tropomyosin 4                                                            |
| GO | chloride channel activity                 | 3 | 58  | 0.509 | 200959 | gamma-aminobutyric acid (GABA) receptor, rho 3                           |
| GO | chloride channel activity                 | 3 | 58  | 0.509 | 2558   | gamma-aminobutyric acid (GABA) A receptor, alpha 5                       |
| GO | chloride channel activity                 | 3 | 58  | 0.509 | 9635   | chloride channel accessory 2                                             |
| GO | oxidoreductase activity, acting on single | 3 | 58  | 0.509 | 283208 | prolyl 4-hydroxylase, alpha polypeptide III                              |
| GO | oxidoreductase activity, acting on single | 3 | 58  | 0.509 | 5264   | phytanoyl-CoA 2-hydroxylase                                              |
| GO | oxidoreductase activity, acting on single | 3 | 58  | 0.509 | 57168  | aspartate beta-hydroxylase domain containing 2                           |
| GO | cell development                          | 1 | 15  | 0.51  | 10052  | gap junction protein, gamma 1, 45kDa                                     |
| GO | focal adhesion assembly                   | 1 | 15  | 0.51  | 10395  | deleted in liver cancer 1                                                |
| GO | polysome                                  | 1 | 15  | 0.51  | 124540 | musashi homolog 2 (Drosophila)                                           |
| GO | female gamete generation                  | 1 | 15  | 0.51  | 1730   | diaphanous homolog 2 (Drosophila)                                        |
| GO | sulfate transport                         | 1 | 15  | 0.51  | 1836   | solute carrier family 26 (sulfate transporter), member 2                 |
| GO | retinal ganglion cell axon guidance       | 1 | 15  | 0.51  | 2045   | EPH receptor A7                                                          |
| GO | homeostasis of number of cells within a   | 1 | 15  | 0.51  | 2149   | coagulation factor II (thrombin) receptor                                |
| GO | positive regulation of cytokine secretior | 1 | 15  | 0.51  | 23705  | cell adhesion molecule 1                                                 |
| GO | oxidoreductase activity, acting on paire  | 1 | 15  | 0.51  | 283208 | prolyl 4-hydroxylase, alpha polypeptide III                              |
| GO | reverse cholesterol transport             | 1 | 15  | 0.51  | 348    | apolipoprotein E                                                         |
| GO | ATPase binding                            | 1 | 15  | 0.51  | 3932   | lymphocyte-specific protein tyrosine kinase                              |
| GO | actin filament bundle assembly            | 1 | 15  | 0.51  | 3936   | lymphocyte cytosolic protein 1 (L-plastin)                               |
| GO | binding of sperm to zona pellucida        | 1 | 15  | 0.51  | 53340  | sperm autoantigenic protein 17                                           |
| GO | leukocyte migration                       | 1 | 15  | 0.51  | 5420   | podocalyxin-like                                                         |

|    |                                            |    |     |       |                                                                                    |
|----|--------------------------------------------|----|-----|-------|------------------------------------------------------------------------------------|
| GO | protein deubiquitination                   | 1  | 15  | 0.51  | 57599 WD repeat domain 48                                                          |
| GO | voltage-gated sodium channel activity      | 1  | 15  | 0.51  | 6335 sodium channel, voltage-gated, type IX, alpha subunit                         |
| GO | cellular metabolic process                 | 1  | 15  | 0.51  | 641 Bloom syndrome, RecQ helicase-like                                             |
| GO | cellular response to heat                  | 1  | 15  | 0.51  | 64131 xylosyltransferase I                                                         |
| GO | substrate-specific transmembrane trans     | 1  | 15  | 0.51  | 6518 solute carrier family 2 (facilitated glucose/fructose transporter), member 5  |
| GO | hair follicle development                  | 1  | 15  | 0.51  | 6662 SRY (sex determining region Y)-box 9                                          |
| GO | chemoattractant activity                   | 1  | 15  | 0.51  | 7857 secretogranin II (chromogranin C)                                             |
| GO | chondrocyte differentiation                | 1  | 15  | 0.51  | 81029 wingless-type MMTV integration site family, member 5B                        |
| GO | regulation of mitotic cell cycle           | 1  | 15  | 0.51  | 8872 cell division cycle 123 homolog ( <i>S. cerevisiae</i> )                      |
| GO | myosin filament                            | 1  | 15  | 0.51  | 9172 myomesin (M-protein) 2, 165kDa                                                |
| GO | GTPase binding                             | 1  | 15  | 0.51  | 9732 dedicator of cytokinesis 4                                                    |
| GO | oxygen binding                             | 2  | 37  | 0.518 | 114757 cytoglobin                                                                  |
| GO | oxygen binding                             | 2  | 37  | 0.518 | 1543 cytochrome P450, family 1, subfamily A, polypeptide 1                         |
| GO | protein catabolic process                  | 2  | 37  | 0.518 | 115290 F-box protein 17                                                            |
| GO | protein catabolic process                  | 2  | 37  | 0.518 | 5702 proteasome (prosome, macropain) 26S subunit, ATPase, 3                        |
| GO | activation of adenylate cyclase activity t | 2  | 37  | 0.518 | 2774 guanine nucleotide binding protein (G protein), alpha activating activity pol |
| GO | activation of adenylate cyclase activity t | 2  | 37  | 0.518 | 5744 parathyroid hormone-like hormone                                              |
| GO | protein serine/threonine phosphatase a     | 2  | 37  | 0.518 | 3932 lymphocyte-specific protein tyrosine kinase                                   |
| GO | protein serine/threonine phosphatase a     | 2  | 37  | 0.518 | 5494 protein phosphatase, Mg <sup>2+</sup> /Mn <sup>2+</sup> dependent, 1A         |
| GO | NADH dehydrogenase (ubiquinone) acti       | 2  | 37  | 0.518 | 4709 NADH dehydrogenase (ubiquinone) 1 beta subcomplex, 3, 12kDa                   |
| GO | NADH dehydrogenase (ubiquinone) acti       | 2  | 37  | 0.518 | 91942 NADH dehydrogenase (ubiquinone) 1 alpha subcomplex, assembly factor 2        |
| GO | receptor binding                           | 10 | 211 | 0.52  | 1730 diaphanous homolog 2 ( <i>Drosophila</i> )                                    |
| GO | receptor binding                           | 10 | 211 | 0.52  | 2149 coagulation factor II (thrombin) receptor                                     |
| GO | receptor binding                           | 10 | 211 | 0.52  | 2150 coagulation factor II (thrombin) receptor-like 1                              |
| GO | receptor binding                           | 10 | 211 | 0.52  | 2281 FK506 binding protein 1B, 12.6 kDa                                            |
| GO | receptor binding                           | 10 | 211 | 0.52  | 23705 cell adhesion molecule 1                                                     |
| GO | receptor binding                           | 10 | 211 | 0.52  | 409 arrestin, beta 2                                                               |
| GO | receptor binding                           | 10 | 211 | 0.52  | 5054 serpin peptidase inhibitor, clade E (nexin, plasminogen activator inhibitor t |
| GO | receptor binding                           | 10 | 211 | 0.52  | 6347 chemokine (C-C motif) ligand 2                                                |
| GO | receptor binding                           | 10 | 211 | 0.52  | 81029 wingless-type MMTV integration site family, member 5B                        |
| GO | receptor binding                           | 10 | 211 | 0.52  | 9542 neuregulin 2                                                                  |
| GO | cell migration                             | 3  | 59  | 0.521 | 1000 cadherin 2, type 1, N-cadherin (neuronal)                                     |
| GO | cell migration                             | 3  | 59  | 0.521 | 115908 collagen triple helix repeat containing 1                                   |
| GO | cell migration                             | 3  | 59  | 0.521 | 1289 collagen, type V, alpha 1                                                     |
| GO | sarcolemma                                 | 3  | 59  | 0.521 | 5588 protein kinase C, theta                                                       |
| GO | sarcolemma                                 | 3  | 59  | 0.521 | 6442 sarcoglycan, alpha (50kDa dystrophin-associated glycoprotein)                 |

|    |                                            |    |     |       |        |                                                                               |
|----|--------------------------------------------|----|-----|-------|--------|-------------------------------------------------------------------------------|
| GO | sarcolemma                                 | 3  | 59  | 0.521 | 6444   | sarcoglycan, delta (35kDa dystrophin-associated glycoprotein)                 |
| GO | Golgi membrane                             | 16 | 343 | 0.529 | 10096  | ARP3 actin-related protein 3 homolog (yeast)                                  |
| GO | Golgi membrane                             | 16 | 343 | 0.529 | 11226  | UDP-N-acetyl-alpha-D-galactosamine:polypeptide N-acetylgalactosaminyltr       |
| GO | Golgi membrane                             | 16 | 343 | 0.529 | 11227  | UDP-N-acetyl-alpha-D-galactosamine:polypeptide N-acetylgalactosaminyltr       |
| GO | Golgi membrane                             | 16 | 343 | 0.529 | 114805 | UDP-N-acetyl-alpha-D-galactosamine:polypeptide N-acetylgalactosaminyltr       |
| GO | Golgi membrane                             | 16 | 343 | 0.529 | 152007 | GLI pathogenesis-related 2                                                    |
| GO | Golgi membrane                             | 16 | 343 | 0.529 | 27065  | DNA segment on chromosome 4 (unique) 234 expressed sequence                   |
| GO | Golgi membrane                             | 16 | 343 | 0.529 | 4893   | neuroblastoma RAS viral (v-ras) oncogene homolog                              |
| GO | Golgi membrane                             | 16 | 343 | 0.529 | 51062  | atlastin GTPase 1                                                             |
| GO | Golgi membrane                             | 16 | 343 | 0.529 | 54756  | interleukin 17 receptor D                                                     |
| GO | Golgi membrane                             | 16 | 343 | 0.529 | 57574  | membrane-associated ring finger (C3HC4) 4                                     |
| GO | Golgi membrane                             | 16 | 343 | 0.529 | 64131  | xylosyltransferase I                                                          |
| GO | Golgi membrane                             | 16 | 343 | 0.529 | 79623  | UDP-N-acetyl-alpha-D-galactosamine:polypeptide N-acetylgalactosaminyltr       |
| GO | Golgi membrane                             | 16 | 343 | 0.529 | 81562  | lectin, mannose-binding 2-like                                                |
| GO | Golgi membrane                             | 16 | 343 | 0.529 | 84752  | UDP-GlcNAc:betaGal beta-1,3-N-acetylglucosaminyltransferase 9                 |
| GO | Golgi membrane                             | 16 | 343 | 0.529 | 9215   | like-glycosyltransferase                                                      |
| GO | Golgi membrane                             | 16 | 343 | 0.529 | 9653   | heparan sulfate 2-O-sulfotransferase 1                                        |
| GO | histone acetyltransferase activity         | 2  | 38  | 0.532 | 10474  | transcriptional adaptor 3                                                     |
| GO | histone acetyltransferase activity         | 2  | 38  | 0.532 | 8520   | histone acetyltransferase 1                                                   |
| GO | positive regulation of gene expression     | 2  | 38  | 0.532 | 10474  | transcriptional adaptor 3                                                     |
| GO | positive regulation of gene expression     | 2  | 38  | 0.532 | 6662   | SRY (sex determining region Y)-box 9                                          |
| GO | positive regulation of angiogenesis        | 2  | 38  | 0.532 | 5054   | serpin peptidase inhibitor, clade E (nexin, plasminogen activator inhibitor t |
| GO | positive regulation of angiogenesis        | 2  | 38  | 0.532 | 79805  | vasohibin 2                                                                   |
| GO | Cajal body                                 | 2  | 38  | 0.532 | 55135  | WD repeat containing, antisense to TP53                                       |
| GO | Cajal body                                 | 2  | 38  | 0.532 | 79833  | gem (nuclear organelle) associated protein 6                                  |
| GO | specific transcriptional repressor activit | 2  | 38  | 0.532 | 7490   | Wilms tumor 1                                                                 |
| GO | specific transcriptional repressor activit | 2  | 38  | 0.532 | 80712  | ESX homeobox 1                                                                |
| GO | triglyceride lipase activity               | 1  | 16  | 0.533 | 13     | arylacetamide deacetylase (esterase)                                          |
| GO | intrinsic to endoplasmic reticulum mem     | 1  | 16  | 0.533 | 2135   | exostoses (multiple)-like 2                                                   |
| GO | positive regulation of vasoconstriction    | 1  | 16  | 0.533 | 2149   | coagulation factor II (thrombin) receptor                                     |
| GO | smoothened signaling pathway               | 1  | 16  | 0.533 | 2736   | GLI family zinc finger 2                                                      |
| GO | glutathione metabolic process              | 1  | 16  | 0.533 | 2878   | glutathione peroxidase 3 (plasma)                                             |
| GO | hydrogen peroxide catabolic process        | 1  | 16  | 0.533 | 2878   | glutathione peroxidase 3 (plasma)                                             |
| GO | positive regulation of mitotic cell cycle  | 1  | 16  | 0.533 | 332    | baculoviral IAP repeat-containing 5                                           |
| GO | response to cocaine                        | 1  | 16  | 0.533 | 5021   | oxytocin receptor                                                             |
| GO | negative regulation of insulin secretion   | 1  | 16  | 0.533 | 5140   | phosphodiesterase 3B, cGMP-inhibited                                          |

|    |                                           |   |    |       |        |                                                                                       |
|----|-------------------------------------------|---|----|-------|--------|---------------------------------------------------------------------------------------|
| GO | mitochondrial proton-transporting ATP     | 1 | 16 | 0.533 | 516    | ATP synthase, H <sup>+</sup> transporting, mitochondrial F0 complex, subunit C1 (subu |
| GO | cAMP-dependent protein kinase regulat     | 1 | 16 | 0.533 | 53340  | sperm autoantigenic protein 17                                                        |
| GO | vitamin D receptor binding                | 1 | 16 | 0.533 | 5469   | mediator complex subunit 1                                                            |
| GO | phosphatidylinositol-3,4,5-trisphosphat   | 1 | 16 | 0.533 | 55803  | ArfGAP with dual PH domains 2                                                         |
| GO | response to cadmium ion                   | 1 | 16 | 0.533 | 57678  | glycerol-3-phosphate acyltransferase, mitochondrial                                   |
| GO | response to nutrient levels               | 1 | 16 | 0.533 | 57678  | glycerol-3-phosphate acyltransferase, mitochondrial                                   |
| GO | translation regulator activity            | 1 | 16 | 0.533 | 65003  | mitochondrial ribosomal protein L11                                                   |
| GO | ion transmembrane transporter activity    | 1 | 16 | 0.533 | 6580   | solute carrier family 22 (organic cation transporter), member 1                       |
| GO | positive regulation of endothelial cell m | 1 | 16 | 0.533 | 659    | bone morphogenetic protein receptor, type II (serine/threonine kinase)                |
| GO | cartilage condensation                    | 1 | 16 | 0.533 | 6662   | SRY (sex determining region Y)-box 9                                                  |
| GO | receptor complex                          | 1 | 16 | 0.533 | 7046   | transforming growth factor, beta receptor 1                                           |
| GO | C-C chemokine receptor activity           | 1 | 16 | 0.533 | 729230 | chemokine (C-C motif) receptor 2                                                      |
| GO | membrane depolarization                   | 1 | 16 | 0.533 | 773    | calcium channel, voltage-dependent, P/Q type, alpha 1A subunit                        |
| GO | protein secretion                         | 1 | 16 | 0.533 | 7857   | secretogranin II (chromogranin C)                                                     |
| GO | mannose binding                           | 1 | 16 | 0.533 | 81562  | lectin, mannose-binding 2-like                                                        |
| GO | response to light stimulus                | 1 | 16 | 0.533 | 8533   | COP9 constitutive photomorphogenic homolog subunit 3 (Arabidopsis)                    |
| GO | beta-catenin binding                      | 2 | 39 | 0.546 | 1000   | cadherin 2, type 1, N-cadherin (neuronal)                                             |
| GO | beta-catenin binding                      | 2 | 39 | 0.546 | 6299   | sal-like 1 (Drosophila)                                                               |
| GO | G-protein signaling, coupled to cyclic nu | 2 | 39 | 0.546 | 4158   | melanocortin 2 receptor (adrenocorticotropic hormone)                                 |
| GO | G-protein signaling, coupled to cyclic nu | 2 | 39 | 0.546 | 6347   | chemokine (C-C motif) ligand 2                                                        |
| GO | transcription cofactor activity           | 2 | 39 | 0.546 | 5469   | mediator complex subunit 1                                                            |
| GO | transcription cofactor activity           | 2 | 39 | 0.546 | 7029   | transcription factor Dp-2 (E2F dimerization partner 2)                                |
| GO | microtubule cytoskeleton organization     | 2 | 39 | 0.546 | 8409   | ubiquitously-expressed transcript                                                     |
| GO | microtubule cytoskeleton organization     | 2 | 39 | 0.546 | 9053   | microtubule-associated protein 7                                                      |
| GO | response to peptide hormone stimulus      | 3 | 62 | 0.554 | 2628   | glycine amidinotransferase (L-arginine:glycine amidinotransferase)                    |
| GO | response to peptide hormone stimulus      | 3 | 62 | 0.554 | 5021   | oxytocin receptor                                                                     |
| GO | response to peptide hormone stimulus      | 3 | 62 | 0.554 | 8835   | suppressor of cytokine signaling 2                                                    |
| GO | peroxidase activity                       | 1 | 17 | 0.555 | 114757 | cytoglobin                                                                            |
| GO | glutathione transferase activity          | 1 | 17 | 0.555 | 221357 | glutathione S-transferase alpha 5                                                     |
| GO | sarcoplasmic reticulum membrane           | 1 | 17 | 0.555 | 2281   | FK506 binding protein 1B, 12.6 kDa                                                    |
| GO | intracellular transport                   | 1 | 17 | 0.555 | 348    | apolipoprotein E                                                                      |
| GO | embryonic pattern specification           | 1 | 17 | 0.555 | 3975   | LIM homeobox 1                                                                        |
| GO | rough endoplasmic reticulum               | 1 | 17 | 0.555 | 411    | arylsulfatase B                                                                       |
| GO | regulation of angiogenesis                | 1 | 17 | 0.555 | 4763   | neurofibromin 1                                                                       |
| GO | midbrain development                      | 1 | 17 | 0.555 | 5015   | orthodenticle homeobox 2                                                              |
| GO | social behavior                           | 1 | 17 | 0.555 | 5021   | oxytocin receptor                                                                     |

|    |                                         |   |     |       |        |                                                                            |
|----|-----------------------------------------|---|-----|-------|--------|----------------------------------------------------------------------------|
| GO | positive regulation of calcium-mediated | 1 | 17  | 0.555 | 5026   | purinergic receptor P2X, ligand-gated ion channel, 5                       |
| GO | mitochondrial small ribosomal subunit   | 1 | 17  | 0.555 | 51023  | mitochondrial ribosomal protein S18C                                       |
| GO | 2 iron, 2 sulfur cluster binding        | 1 | 17  | 0.555 | 51218  | glutaredoxin 5                                                             |
| GO | histone deacetylation                   | 1 | 17  | 0.555 | 5245   | prohibitin                                                                 |
| GO | embryonic hindlimb morphogenesis        | 1 | 17  | 0.555 | 5469   | mediator complex subunit 1                                                 |
| GO | mitochondrial ribosome                  | 1 | 17  | 0.555 | 65003  | mitochondrial ribosomal protein L11                                        |
| GO | regulation of pH                        | 1 | 17  | 0.555 | 6549   | solute carrier family 9 (sodium/hydrogen exchanger), member 2              |
| GO | small nuclear ribonucleoprotein comple  | 1 | 17  | 0.555 | 6637   | small nuclear ribonucleoprotein polypeptide G                              |
| GO | epithelial to mesenchymal transition    | 1 | 17  | 0.555 | 6662   | SRY (sex determining region Y)-box 9                                       |
| GO | actin filament capping                  | 1 | 17  | 0.555 | 6711   | spectrin, beta, non-erythrocytic 1                                         |
| GO | nuclear body                            | 1 | 17  | 0.555 | 79833  | gem (nuclear organelle) associated protein 6                               |
| GO | cis-Golgi network                       | 1 | 17  | 0.555 | 79929  | MAP6 domain containing 1                                                   |
| GO | spindle assembly                        | 1 | 17  | 0.555 | 93323  | HAUS augmin-like complex, subunit 8                                        |
| GO | carbohydrate biosynthetic process       | 1 | 17  | 0.555 | 9653   | heparan sulfate 2-O-sulfotransferase 1                                     |
| GO | sodium ion transport                    | 6 | 129 | 0.557 | 201780 | solute carrier family 10 (sodium/bile acid cotransporter family), member 4 |
| GO | sodium ion transport                    | 6 | 129 | 0.557 | 6335   | sodium channel, voltage-gated, type IX, alpha subunit                      |
| GO | sodium ion transport                    | 6 | 129 | 0.557 | 6527   | solute carrier family 5 (low affinity glucose cotransporter), member 4     |
| GO | sodium ion transport                    | 6 | 129 | 0.557 | 6546   | solute carrier family 8 (sodium/calcium exchanger), member 1               |
| GO | sodium ion transport                    | 6 | 129 | 0.557 | 6549   | solute carrier family 9 (sodium/hydrogen exchanger), member 2              |
| GO | sodium ion transport                    | 6 | 129 | 0.557 | 9497   | solute carrier family 4, sodium bicarbonate cotransporter, member 7        |
| GO | receptor-mediated endocytosis           | 2 | 40  | 0.56  | 348    | apolipoprotein E                                                           |
| GO | receptor-mediated endocytosis           | 2 | 40  | 0.56  | 9260   | PDZ and LIM domain 7 (enigma)                                              |
| GO | cell redox homeostasis                  | 3 | 63  | 0.565 | 10190  | thioredoxin domain containing 9                                            |
| GO | cell redox homeostasis                  | 3 | 63  | 0.565 | 10539  | glutaredoxin 3                                                             |
| GO | cell redox homeostasis                  | 3 | 63  | 0.565 | 51218  | glutaredoxin 5                                                             |
| GO | glycolysis                              | 2 | 41  | 0.574 | 2027   | enolase 3 (beta, muscle)                                                   |
| GO | glycolysis                              | 2 | 41  | 0.574 | 669    | 2,3-bisphosphoglycerate mutase                                             |
| GO | peroxisomal membrane                    | 2 | 41  | 0.574 | 23305  | acyl-CoA synthetase long-chain family member 6                             |
| GO | peroxisomal membrane                    | 2 | 41  | 0.574 | 255027 | MPV17 mitochondrial membrane protein-like                                  |
| GO | negative regulation of cell cycle       | 2 | 41  | 0.574 | 3248   | hydroxyprostaglandin dehydrogenase 15-(NAD)                                |
| GO | negative regulation of cell cycle       | 2 | 41  | 0.574 | 3624   | inhibin, beta A                                                            |
| GO | cholesterol homeostasis                 | 2 | 41  | 0.574 | 348    | apolipoprotein E                                                           |
| GO | cholesterol homeostasis                 | 2 | 41  | 0.574 | 7840   | Alstrom syndrome 1                                                         |
| GO | neuron projection development           | 2 | 41  | 0.574 | 3516   | recombination signal binding protein for immunoglobulin kappa J region     |
| GO | neuron projection development           | 2 | 41  | 0.574 | 4734   | neural precursor cell expressed, developmentally down-regulated 4          |
| GO | ER to Golgi vesicle-mediated transport  | 2 | 41  | 0.574 | 6683   | spastin                                                                    |

|    |                                            |   |    |       |        |                                                                         |
|----|--------------------------------------------|---|----|-------|--------|-------------------------------------------------------------------------|
| GO | ER to Golgi vesicle-mediated transport     | 2 | 41 | 0.574 | 81562  | lectin, mannose-binding 2-like                                          |
| GO | ribosome binding                           | 1 | 18 | 0.575 | 1984   | eukaryotic translation initiation factor 5A                             |
| GO | lipoprotein metabolic process              | 1 | 18 | 0.575 | 341    | apolipoprotein C-I                                                      |
| GO | MHC class I protein complex                | 1 | 18 | 0.575 | 353091 | retinoic acid early transcript 1G                                       |
| GO | regulation of insulin secretion            | 1 | 18 | 0.575 | 3952   | leptin                                                                  |
| GO | protein import into nucleus, translocati   | 1 | 18 | 0.575 | 406    | aryl hydrocarbon receptor nuclear translocator-like                     |
| GO | protein ubiquitination involved in ubiqu   | 1 | 18 | 0.575 | 4734   | neural precursor cell expressed, developmentally down-regulated 4       |
| GO | endocrine pancreas development             | 1 | 18 | 0.575 | 5140   | phosphodiesterase 3B, cGMP-inhibited                                    |
| GO | cellular process                           | 1 | 18 | 0.575 | 5184   | peptidase D                                                             |
| GO | embryonic placenta development             | 1 | 18 | 0.575 | 5469   | mediator complex subunit 1                                              |
| GO | WW domain binding                          | 1 | 18 | 0.575 | 56937  | prostate transmembrane protein, androgen induced 1                      |
| GO | phosphatidylinositol binding               | 1 | 18 | 0.575 | 57590  | WD repeat and FYVE domain containing 1                                  |
| GO | transmembrane receptor protein tyrosin     | 1 | 18 | 0.575 | 5795   | protein tyrosine phosphatase, receptor type, J                          |
| GO | DNA fragmentation involved in apoptot      | 1 | 18 | 0.575 | 581    | BCL2-associated X protein                                               |
| GO | inner ear development                      | 1 | 18 | 0.575 | 6657   | SRY (sex determining region Y)-box 2                                    |
| GO | cortical cytoskeleton                      | 1 | 18 | 0.575 | 6711   | spectrin, beta, non-erythrocytic 1                                      |
| GO | peptidyl-threonine phosphorylation         | 1 | 18 | 0.575 | 7046   | transforming growth factor, beta receptor 1                             |
| GO | heme biosynthetic process                  | 1 | 18 | 0.575 | 7389   | uroporphyrinogen decarboxylase                                          |
| GO | negative regulation of translation         | 1 | 18 | 0.575 | 7490   | Wilms tumor 1                                                           |
| GO | cornified envelope                         | 1 | 18 | 0.575 | 84518  | cornifelin                                                              |
| GO | establishment or maintenance of cell pc    | 1 | 18 | 0.575 | 9053   | microtubule-associated protein 7                                        |
| GO | anion transport                            | 1 | 18 | 0.575 | 9497   | solute carrier family 4, sodium bicarbonate cotransporter, member 7     |
| GO | transcription initiation from RNA polym    | 3 | 64 | 0.576 | 2965   | general transcription factor IIH, polypeptide 1, 62kDa                  |
| GO | transcription initiation from RNA polym    | 3 | 64 | 0.576 | 5440   | polymerase (RNA) II (DNA directed) polypeptide K, 7.0kDa                |
| GO | transcription initiation from RNA polym    | 3 | 64 | 0.576 | 5469   | mediator complex subunit 1                                              |
| GO | patterning of blood vessels                | 1 | 19 | 0.595 | 10672  | guanine nucleotide binding protein (G protein), alpha 13                |
| GO | protein amino acid O-linked glycosylatic   | 1 | 19 | 0.595 | 11226  | UDP-N-acetyl-alpha-D-galactosamine:polypeptide N-acetylgalactosaminyltr |
| GO | cadherin binding                           | 1 | 19 | 0.595 | 1496   | catenin (cadherin-associated protein), alpha 2                          |
| GO | negative regulation of cell differentiatio | 1 | 19 | 0.595 | 182    | jagged 1 (Alagille syndrome)                                            |
| GO | leukotriene biosynthetic process           | 1 | 19 | 0.595 | 241    | arachidonate 5-lipoxygenase-activating protein                          |
| GO | RNA metabolic process                      | 1 | 19 | 0.595 | 26019  | UPF2 regulator of nonsense transcripts homolog (yeast)                  |
| GO | lipid transporter activity                 | 1 | 19 | 0.595 | 348    | apolipoprotein E                                                        |
| GO | phosphoprotein binding                     | 1 | 19 | 0.595 | 5140   | phosphodiesterase 3B, cGMP-inhibited                                    |
| GO | regulation of neuron differentiation       | 1 | 19 | 0.595 | 53637  | sphingosine-1-phosphate receptor 5                                      |
| GO | insulin-like growth factor binding         | 1 | 19 | 0.595 | 5654   | HtrA serine peptidase 1                                                 |
| GO | neutrophil chemotaxis                      | 1 | 19 | 0.595 | 6347   | chemokine (C-C motif) ligand 2                                          |

|    |                                             |     |      |       |                                                                                           |
|----|---------------------------------------------|-----|------|-------|-------------------------------------------------------------------------------------------|
| GO | telomere maintenance                        | 1   | 19   | 0.595 | 641 Bloom syndrome, RecQ helicase-like                                                    |
| GO | T-tubule                                    | 1   | 19   | 0.595 | 6546 solute carrier family 8 (sodium/calcium exchanger), member 1                         |
| GO | chemokine receptor activity                 | 1   | 19   | 0.595 | 729230 chemokine (C-C motif) receptor 2                                                   |
| GO | regulation of signal transduction           | 1   | 19   | 0.595 | 8835 suppressor of cytokine signaling 2                                                   |
| GO | inner ear morphogenesis                     | 2   | 43   | 0.6   | 55084 sine oculis binding protein homolog (Drosophila)                                    |
| GO | inner ear morphogenesis                     | 2   | 43   | 0.6   | 6657 SRY (sex determining region Y)-box 2                                                 |
| GO | phosphotransferase activity, alcohol grc    | 1   | 20   | 0.614 | 1716 deoxyguanosine kinase                                                                |
| GO | desmosome                                   | 1   | 20   | 0.614 | 1830 desmoglein 3 (pemphigus vulgaris antigen)                                            |
| GO | translation elongation factor activity      | 1   | 20   | 0.614 | 1984 eukaryotic translation initiation factor 5A                                          |
| GO | phosphorylation                             | 1   | 20   | 0.614 | 2045 EPH receptor A7                                                                      |
| GO | response to steroid hormone stimulus        | 1   | 20   | 0.614 | 23305 acyl-CoA synthetase long-chain family member 6                                      |
| GO | proteasomal ubiquitin-dependent prote       | 1   | 20   | 0.614 | 409 arrestin, beta 2                                                                      |
| GO | ubiquitin binding                           | 1   | 20   | 0.614 | 4734 neural precursor cell expressed, developmentally down-regulated 4                    |
| GO | hydrogen ion transmembrane transport        | 1   | 20   | 0.614 | 516 ATP synthase, H <sup>+</sup> transporting, mitochondrial F0 complex, subunit C1 (subu |
| GO | positive regulation of bone mineralizati    | 1   | 20   | 0.614 | 659 bone morphogenetic protein receptor, type II (serine/threonine kinase)                |
| GO | response to radiation                       | 1   | 20   | 0.614 | 6591 snail homolog 2 (Drosophila)                                                         |
| GO | positive regulation of cell adhesion        | 1   | 20   | 0.614 | 7168 tropomyosin 1 (alpha)                                                                |
| GO | clathrin adaptor complex                    | 1   | 20   | 0.614 | 8905 adaptor-related protein complex 1, sigma 2 subunit                                   |
| GO | phosphate metabolic process                 | 1   | 20   | 0.614 | 97 acylphosphatase 1, erythrocyte (common) type                                           |
| GO | aromatase activity                          | 1   | 21   | 0.632 | 1543 cytochrome P450, family 1, subfamily A, polypeptide 1                                |
| GO | translation factor activity, nucleic acid b | 1   | 21   | 0.632 | 1983 eukaryotic translation initiation factor 5                                           |
| GO | transferase activity, transferring hexosy   | 1   | 21   | 0.632 | 2135 exostoses (multiple)-like 2                                                          |
| GO | branching morphogenesis of a tube           | 1   | 21   | 0.632 | 2736 GLI family zinc finger 2                                                             |
| GO | regulation of multicellular organism gro    | 1   | 21   | 0.632 | 27429 HtrA serine peptidase 2                                                             |
| GO | negative regulation of caspase activity     | 1   | 21   | 0.632 | 332 baculoviral IAP repeat-containing 5                                                   |
| GO | gastrulation with mouth forming secon       | 1   | 21   | 0.632 | 3975 LIM homeobox 1                                                                       |
| GO | positive regulation of inflammatory resp    | 1   | 21   | 0.632 | 5054 serpin peptidase inhibitor, clade E (nexin, plasminogen activator inhibitor t        |
| GO | dephosphorylation                           | 1   | 21   | 0.632 | 5494 protein phosphatase, Mg <sup>2+</sup> /Mn <sup>2+</sup> dependent, 1A                |
| GO | negative regulation of BMP signaling pa     | 1   | 21   | 0.632 | 5654 HtrA serine peptidase 1                                                              |
| GO | defense response to virus                   | 1   | 21   | 0.632 | 57678 glycerol-3-phosphate acyltransferase, mitochondrial                                 |
| GO | release of cytochrome c from mitochon       | 1   | 21   | 0.632 | 581 BCL2-associated X protein                                                             |
| GO | p53 binding                                 | 1   | 21   | 0.632 | 641 Bloom syndrome, RecQ helicase-like                                                    |
| GO | negative regulation of gene-specific trar   | 1   | 21   | 0.632 | 7490 Wilms tumor 1                                                                        |
| GO | positive regulation of mesenchymal cell     | 1   | 21   | 0.632 | 8626 tumor protein p63                                                                    |
| GO | integral to membrane                        | 177 | 3857 | 0.989 | 1000 cadherin 2, type 1, N-cadherin (neuronal)                                            |
| GO | integral to membrane                        | 177 | 3857 | 0.989 | 1E+08 transmembrane protein 194B                                                          |

|    |                      |     |      |       |                                                                                |
|----|----------------------|-----|------|-------|--------------------------------------------------------------------------------|
| GO | integral to membrane | 177 | 3857 | 0.989 | 10052 gap junction protein, gamma 1, 45kDa                                     |
| GO | integral to membrane | 177 | 3857 | 0.989 | 1008 cadherin 10, type 2 (T2-cadherin)                                         |
| GO | integral to membrane | 177 | 3857 | 0.989 | 10457 glycoprotein (transmembrane) nmb                                         |
| GO | integral to membrane | 177 | 3857 | 0.989 | 1047 calmegin                                                                  |
| GO | integral to membrane | 177 | 3857 | 0.989 | 10683 delta-like 3 (Drosophila)                                                |
| GO | integral to membrane | 177 | 3857 | 0.989 | 11010 GLI pathogenesis-related 1                                               |
| GO | integral to membrane | 177 | 3857 | 0.989 | 11149 blood vessel epicardial substance                                        |
| GO | integral to membrane | 177 | 3857 | 0.989 | 11226 UDP-N-acetyl-alpha-D-galactosamine:polypeptide N-acetylgalactosaminyltr  |
| GO | integral to membrane | 177 | 3857 | 0.989 | 11227 UDP-N-acetyl-alpha-D-galactosamine:polypeptide N-acetylgalactosaminyltr  |
| GO | integral to membrane | 177 | 3857 | 0.989 | 112616 CKLF-like MARVEL transmembrane domain containing 7                      |
| GO | integral to membrane | 177 | 3857 | 0.989 | 1136 cholinergic receptor, nicotinic, alpha 3                                  |
| GO | integral to membrane | 177 | 3857 | 0.989 | 1138 cholinergic receptor, nicotinic, alpha 5                                  |
| GO | integral to membrane | 177 | 3857 | 0.989 | 114805 UDP-N-acetyl-alpha-D-galactosamine:polypeptide N-acetylgalactosaminyltr |
| GO | integral to membrane | 177 | 3857 | 0.989 | 119749 olfactory receptor, family 4, subfamily C, member 46                    |
| GO | integral to membrane | 177 | 3857 | 0.989 | 120114 FAT tumor suppressor homolog 3 (Drosophila)                             |
| GO | integral to membrane | 177 | 3857 | 0.989 | 123920 CKLF-like MARVEL transmembrane domain containing 3                      |
| GO | integral to membrane | 177 | 3857 | 0.989 | 125962 olfactory receptor, family 7, subfamily G, member 1                     |
| GO | integral to membrane | 177 | 3857 | 0.989 | 127534 gap junction protein, beta 4, 30.3kDa                                   |
| GO | integral to membrane | 177 | 3857 | 0.989 | 127670 transmembrane epididymal protein 1                                      |
| GO | integral to membrane | 177 | 3857 | 0.989 | 128414 Na <sup>+</sup> /K <sup>+</sup> transporting ATPase interacting 4       |
| GO | integral to membrane | 177 | 3857 | 0.989 | 13 arylacetamide deacetylase (esterase)                                        |
| GO | integral to membrane | 177 | 3857 | 0.989 | 130507 ubiquitin protein ligase E3 component n-recogin 3 (putative)            |
| GO | integral to membrane | 177 | 3857 | 0.989 | 131450 CD200 receptor 1                                                        |
| GO | integral to membrane | 177 | 3857 | 0.989 | 134145 family with sequence similarity 173, member B                           |
| GO | integral to membrane | 177 | 3857 | 0.989 | 134285 transmembrane protein 171                                               |
| GO | integral to membrane | 177 | 3857 | 0.989 | 138255 chromosome 9 open reading frame 135                                     |
| GO | integral to membrane | 177 | 3857 | 0.989 | 144448 tetraspanin 19                                                          |
| GO | integral to membrane | 177 | 3857 | 0.989 | 145173 beta 1,3-galactosyltransferase-like                                     |
| GO | integral to membrane | 177 | 3857 | 0.989 | 147645 V-set and immunoglobulin domain containing 10 like                      |
| GO | integral to membrane | 177 | 3857 | 0.989 | 151188 ADP-ribosylation-like factor 6 interacting protein 6                    |
| GO | integral to membrane | 177 | 3857 | 0.989 | 151194 family with sequence similarity 119, member A                           |
| GO | integral to membrane | 177 | 3857 | 0.989 | 154215 Na <sup>+</sup> /K <sup>+</sup> transporting ATPase interacting 2       |
| GO | integral to membrane | 177 | 3857 | 0.989 | 157753 transmembrane protein 74                                                |
| GO | integral to membrane | 177 | 3857 | 0.989 | 162494 rhomboid, veinlet-like 3 (Drosophila)                                   |
| GO | integral to membrane | 177 | 3857 | 0.989 | 1733 deiodinase, iodothyronine, type I                                         |
| GO | integral to membrane | 177 | 3857 | 0.989 | 1830 desmoglein 3 (pemphigus vulgaris antigen)                                 |



|    |                      |     |      |       |        |                                                                            |
|----|----------------------|-----|------|-------|--------|----------------------------------------------------------------------------|
| GO | integral to membrane | 177 | 3857 | 0.989 | 200959 | gamma-aminobutyric acid (GABA) receptor, rho 3                             |
| GO | integral to membrane | 177 | 3857 | 0.989 | 201780 | solute carrier family 10 (sodium/bile acid cotransporter family), member 4 |
| GO | integral to membrane | 177 | 3857 | 0.989 | 205251 | non-protein coding RNA 116                                                 |
| GO | integral to membrane | 177 | 3857 | 0.989 | 2135   | exostoses (multiple)-like 2                                                |
| GO | integral to membrane | 177 | 3857 | 0.989 | 221687 | ring finger protein 182                                                    |
| GO | integral to membrane | 177 | 3857 | 0.989 | 222611 | G protein-coupled receptor 111                                             |
| GO | integral to membrane | 177 | 3857 | 0.989 | 22801  | integrin, alpha 11                                                         |
| GO | integral to membrane | 177 | 3857 | 0.989 | 23245  | astrotactin 2                                                              |
| GO | integral to membrane | 177 | 3857 | 0.989 | 23305  | acyl-CoA synthetase long-chain family member 6                             |
| GO | integral to membrane | 177 | 3857 | 0.989 | 23432  | G protein-coupled receptor 161                                             |
| GO | integral to membrane | 177 | 3857 | 0.989 | 23562  | claudin 14                                                                 |
| GO | integral to membrane | 177 | 3857 | 0.989 | 23705  | cell adhesion molecule 1                                                   |
| GO | integral to membrane | 177 | 3857 | 0.989 | 241    | arachidonate 5-lipoxygenase-activating protein                             |
| GO | integral to membrane | 177 | 3857 | 0.989 | 253559 | cell adhesion molecule 2                                                   |
| GO | integral to membrane | 177 | 3857 | 0.989 | 255027 | MPV17 mitochondrial membrane protein-like                                  |
| GO | integral to membrane | 177 | 3857 | 0.989 | 25758  | chromosome 11 open reading frame 41                                        |
| GO | integral to membrane | 177 | 3857 | 0.989 | 25789  | transmembrane protein 59-like                                              |
| GO | integral to membrane | 177 | 3857 | 0.989 | 25817  | family with sequence similarity 19 (chemokine (C-C motif)-like), member A' |
| GO | integral to membrane | 177 | 3857 | 0.989 | 26032  | sushi domain containing 5                                                  |
| GO | integral to membrane | 177 | 3857 | 0.989 | 26154  | ATP-binding cassette, sub-family A (ABC1), member 12                       |
| GO | integral to membrane | 177 | 3857 | 0.989 | 27065  | DNA segment on chromosome 4 (unique) 234 expressed sequence                |
| GO | integral to membrane | 177 | 3857 | 0.989 | 27429  | HtrA serine peptidase 2                                                    |
| GO | integral to membrane | 177 | 3857 | 0.989 | 282770 | olfactory receptor, family 10, subfamily AG, member 1                      |
| GO | integral to membrane | 177 | 3857 | 0.989 | 283111 | olfactory receptor, family 51, subfamily V, member 1                       |
| GO | integral to membrane | 177 | 3857 | 0.989 | 284415 | V-set and transmembrane domain containing 1                                |
| GO | integral to membrane | 177 | 3857 | 0.989 | 284417 | transmembrane protein 150B                                                 |
| GO | integral to membrane | 177 | 3857 | 0.989 | 2850   | G protein-coupled receptor 27                                              |
| GO | integral to membrane | 177 | 3857 | 0.989 | 285659 | olfactory receptor, family 2, subfamily V, member 2                        |
| GO | integral to membrane | 177 | 3857 | 0.989 | 285761 | discoidin, CUB and LCCL domain containing 1                                |
| GO | integral to membrane | 177 | 3857 | 0.989 | 286234 | chromosome 9 open reading frame 79                                         |
| GO | integral to membrane | 177 | 3857 | 0.989 | 2906   | glutamate receptor, ionotropic, N-methyl D-aspartate 2D                    |
| GO | integral to membrane | 177 | 3857 | 0.989 | 29940  | dermatan sulfate epimerase                                                 |
| GO | integral to membrane | 177 | 3857 | 0.989 | 3037   | hyaluronan synthase 2                                                      |
| GO | integral to membrane | 177 | 3857 | 0.989 | 340273 | ATP-binding cassette, sub-family B (MDR/TAP), member 5                     |
| GO | integral to membrane | 177 | 3857 | 0.989 | 344805 | transmembrane protease, serine 7                                           |
| GO | integral to membrane | 177 | 3857 | 0.989 | 344838 | progesterone and adipoQ receptor family member IX                          |

|    |                      |     |      |       |        |                                                                                             |
|----|----------------------|-----|------|-------|--------|---------------------------------------------------------------------------------------------|
| GO | integral to membrane | 177 | 3857 | 0.989 | 347902 | adhesion molecule with Ig-like domain 2                                                     |
| GO | integral to membrane | 177 | 3857 | 0.989 | 348938 | NIPA-like domain containing 4                                                               |
| GO | integral to membrane | 177 | 3857 | 0.989 | 353091 | retinoic acid early transcript 1G                                                           |
| GO | integral to membrane | 177 | 3857 | 0.989 | 355    | Fas (TNF receptor superfamily, member 6)                                                    |
| GO | integral to membrane | 177 | 3857 | 0.989 | 3694   | integrin, beta 6                                                                            |
| GO | integral to membrane | 177 | 3857 | 0.989 | 3754   | potassium voltage-gated channel, subfamily F, member 1                                      |
| GO | integral to membrane | 177 | 3857 | 0.989 | 3756   | potassium voltage-gated channel, subfamily H (eag-related), member 1                        |
| GO | integral to membrane | 177 | 3857 | 0.989 | 3763   | potassium inwardly-rectifying channel, subfamily J, member 6                                |
| GO | integral to membrane | 177 | 3857 | 0.989 | 3778   | potassium large conductance calcium-activated channel, subfamily M, alpha                   |
| GO | integral to membrane | 177 | 3857 | 0.989 | 387700 | solute carrier family 16, member 12 (monocarboxylic acid transporter 12)                    |
| GO | integral to membrane | 177 | 3857 | 0.989 | 388394 | reprimin-like                                                                               |
| GO | integral to membrane | 177 | 3857 | 0.989 | 390061 | olfactory receptor, family 51, subfamily Q, member 1                                        |
| GO | integral to membrane | 177 | 3857 | 0.989 | 391114 | olfactory receptor, family 6, subfamily K, member 3                                         |
| GO | integral to membrane | 177 | 3857 | 0.989 | 400451 | family with sequence similarity 174, member B                                               |
| GO | integral to membrane | 177 | 3857 | 0.989 | 4709   | NADH dehydrogenase (ubiquinone) 1 beta subcomplex, 3, 12kDa                                 |
| GO | integral to membrane | 177 | 3857 | 0.989 | 479    | ATPase, H <sup>+</sup> /K <sup>+</sup> transporting, nongastric, alpha polypeptide          |
| GO | integral to membrane | 177 | 3857 | 0.989 | 5101   | protocadherin 9                                                                             |
| GO | integral to membrane | 177 | 3857 | 0.989 | 51062  | atlastin GTPase 1                                                                           |
| GO | integral to membrane | 177 | 3857 | 0.989 | 51136  | ring finger protein, transmembrane 1                                                        |
| GO | integral to membrane | 177 | 3857 | 0.989 | 51308  | receptor accessory protein 2                                                                |
| GO | integral to membrane | 177 | 3857 | 0.989 | 5140   | phosphodiesterase 3B, cGMP-inhibited                                                        |
| GO | integral to membrane | 177 | 3857 | 0.989 | 516    | ATP synthase, H <sup>+</sup> transporting, mitochondrial F0 complex, subunit C1 (subunit c) |
| GO | integral to membrane | 177 | 3857 | 0.989 | 51768  | transmembrane 7 superfamily member 3                                                        |
| GO | integral to membrane | 177 | 3857 | 0.989 | 53637  | sphingosine-1-phosphate receptor 5                                                          |
| GO | integral to membrane | 177 | 3857 | 0.989 | 54210  | triggering receptor expressed on myeloid cells 1                                            |
| GO | integral to membrane | 177 | 3857 | 0.989 | 54733  | solute carrier family 35, member F2                                                         |
| GO | integral to membrane | 177 | 3857 | 0.989 | 54756  | interleukin 17 receptor D                                                                   |
| GO | integral to membrane | 177 | 3857 | 0.989 | 54822  | transient receptor potential cation channel, subfamily M, member 7                          |
| GO | integral to membrane | 177 | 3857 | 0.989 | 55016  | membrane-associated ring finger (C3HC4) 1                                                   |
| GO | integral to membrane | 177 | 3857 | 0.989 | 55028  | chromosome 17 open reading frame 80                                                         |
| GO | integral to membrane | 177 | 3857 | 0.989 | 55117  | solute carrier family 6 (neutral amino acid transporter), member 15                         |
| GO | integral to membrane | 177 | 3857 | 0.989 | 55244  | solute carrier family 47, member 1                                                          |
| GO | integral to membrane | 177 | 3857 | 0.989 | 55283  | mucolipin 3                                                                                 |
| GO | integral to membrane | 177 | 3857 | 0.989 | 554279 | chromosome 1 open reading frame 98                                                          |
| GO | integral to membrane | 177 | 3857 | 0.989 | 56104  | protocadherin gamma subfamily B, 1                                                          |
| GO | integral to membrane | 177 | 3857 | 0.989 | 56126  | protocadherin beta 10                                                                       |

|    |                      |     |      |       |        |                                                                              |
|----|----------------------|-----|------|-------|--------|------------------------------------------------------------------------------|
| GO | integral to membrane | 177 | 3857 | 0.989 | 56133  | protocadherin beta 2                                                         |
| GO | integral to membrane | 177 | 3857 | 0.989 | 56241  | sushi domain containing 2                                                    |
| GO | integral to membrane | 177 | 3857 | 0.989 | 56479  | potassium voltage-gated channel, KQT-like subfamily, member 5                |
| GO | integral to membrane | 177 | 3857 | 0.989 | 56937  | prostate transmembrane protein, androgen induced 1                           |
| GO | integral to membrane | 177 | 3857 | 0.989 | 57168  | aspartate beta-hydroxylase domain containing 2                               |
| GO | integral to membrane | 177 | 3857 | 0.989 | 57484  | ring finger protein 150                                                      |
| GO | integral to membrane | 177 | 3857 | 0.989 | 57574  | membrane-associated ring finger (C3HC4) 4                                    |
| GO | integral to membrane | 177 | 3857 | 0.989 | 57575  | protocadherin 10                                                             |
| GO | integral to membrane | 177 | 3857 | 0.989 | 57650  | KIAA1524                                                                     |
| GO | integral to membrane | 177 | 3857 | 0.989 | 57678  | glycerol-3-phosphate acyltransferase, mitochondrial                          |
| GO | integral to membrane | 177 | 3857 | 0.989 | 581    | BCL2-associated X protein                                                    |
| GO | integral to membrane | 177 | 3857 | 0.989 | 60386  | solute carrier family 25 (mitochondrial thiamine pyrophosphate carrier), m   |
| GO | integral to membrane | 177 | 3857 | 0.989 | 60492  | coiled-coil domain containing 90B                                            |
| GO | integral to membrane | 177 | 3857 | 0.989 | 6335   | sodium channel, voltage-gated, type IX, alpha subunit                        |
| GO | integral to membrane | 177 | 3857 | 0.989 | 64131  | xylosyltransferase I                                                         |
| GO | integral to membrane | 177 | 3857 | 0.989 | 64208  | popeye domain containing 3                                                   |
| GO | integral to membrane | 177 | 3857 | 0.989 | 64417  | chromosome 5 open reading frame 28                                           |
| GO | integral to membrane | 177 | 3857 | 0.989 | 6442   | sarcoglycan, alpha (50kDa dystrophin-associated glycoprotein)                |
| GO | integral to membrane | 177 | 3857 | 0.989 | 6444   | sarcoglycan, delta (35kDa dystrophin-associated glycoprotein)                |
| GO | integral to membrane | 177 | 3857 | 0.989 | 64747  | major facilitator superfamily domain containing 1                            |
| GO | integral to membrane | 177 | 3857 | 0.989 | 65055  | receptor accessory protein 1                                                 |
| GO | integral to membrane | 177 | 3857 | 0.989 | 65062  | amyotrophic lateral sclerosis 2 (juvenile) chromosome region, candidate 4    |
| GO | integral to membrane | 177 | 3857 | 0.989 | 6518   | solute carrier family 2 (facilitated glucose/fructose transporter), member 5 |
| GO | integral to membrane | 177 | 3857 | 0.989 | 6527   | solute carrier family 5 (low affinity glucose cotransporter), member 4       |
| GO | integral to membrane | 177 | 3857 | 0.989 | 6549   | solute carrier family 9 (sodium/hydrogen exchanger), member 2                |
| GO | integral to membrane | 177 | 3857 | 0.989 | 66000  | transmembrane protein 108                                                    |
| GO | integral to membrane | 177 | 3857 | 0.989 | 6683   | spastin                                                                      |
| GO | integral to membrane | 177 | 3857 | 0.989 | 6785   | elongation of very long chain fatty acids (FEN1/Elo2, SUR4/Elo3, yeast)-like |
| GO | integral to membrane | 177 | 3857 | 0.989 | 6833   | ATP-binding cassette, sub-family C (CFTR/MRP), member 8                      |
| GO | integral to membrane | 177 | 3857 | 0.989 | 7046   | transforming growth factor, beta receptor 1                                  |
| GO | integral to membrane | 177 | 3857 | 0.989 | 729025 | solute carrier family 15, member 5                                           |
| GO | integral to membrane | 177 | 3857 | 0.989 | 729230 | chemokine (C-C motif) receptor 2                                             |
| GO | integral to membrane | 177 | 3857 | 0.989 | 7348   | uropod 1B                                                                    |
| GO | integral to membrane | 177 | 3857 | 0.989 | 773    | calcium channel, voltage-dependent, P/Q type, alpha 1A subunit               |
| GO | integral to membrane | 177 | 3857 | 0.989 | 79071  | ELOVL family member 6, elongation of long chain fatty acids (FEN1/Elo2, SL   |
| GO | integral to membrane | 177 | 3857 | 0.989 | 79135  | apolipoprotein O                                                             |

|    |                             |     |      |       |       |                                                                         |
|----|-----------------------------|-----|------|-------|-------|-------------------------------------------------------------------------|
| GO | integral to membrane        | 177 | 3857 | 0.989 | 79623 | UDP-N-acetyl-alpha-D-galactosamine:polypeptide N-acetylgalactosaminyltr |
| GO | integral to membrane        | 177 | 3857 | 0.989 | 79669 | chromosome 3 open reading frame 52                                      |
| GO | integral to membrane        | 177 | 3857 | 0.989 | 79993 | ELOVL family member 7, elongation of long chain fatty acids (yeast)     |
| GO | integral to membrane        | 177 | 3857 | 0.989 | 80342 | TRAF3 interacting protein 3                                             |
| GO | integral to membrane        | 177 | 3857 | 0.989 | 81035 | collectin sub-family member 12                                          |
| GO | integral to membrane        | 177 | 3857 | 0.989 | 81562 | lectin, mannose-binding 2-like                                          |
| GO | integral to membrane        | 177 | 3857 | 0.989 | 8325  | frizzled homolog 8 (Drosophila)                                         |
| GO | integral to membrane        | 177 | 3857 | 0.989 | 83700 | junctional adhesion molecule 3                                          |
| GO | integral to membrane        | 177 | 3857 | 0.989 | 83930 | STARD3 N-terminal like                                                  |
| GO | integral to membrane        | 177 | 3857 | 0.989 | 84168 | anthrax toxin receptor 1                                                |
| GO | integral to membrane        | 177 | 3857 | 0.989 | 84189 | SLIT and NTRK-like family, member 6                                     |
| GO | integral to membrane        | 177 | 3857 | 0.989 | 84230 | leucine rich repeat containing 8 family, member C                       |
| GO | integral to membrane        | 177 | 3857 | 0.989 | 84620 | ST6 beta-galactosamide alpha-2,6-sialyltransferase 2                    |
| GO | integral to membrane        | 177 | 3857 | 0.989 | 84752 | UDP-GlcNAc:betaGal beta-1,3-N-acetylglucosaminyltransferase 9           |
| GO | integral to membrane        | 177 | 3857 | 0.989 | 84769 | MPV17 mitochondrial membrane protein-like 2                             |
| GO | integral to membrane        | 177 | 3857 | 0.989 | 84910 | transmembrane protein 87B                                               |
| GO | integral to membrane        | 177 | 3857 | 0.989 | 85027 | chromosome 5 open reading frame 62                                      |
| GO | integral to membrane        | 177 | 3857 | 0.989 | 85455 | dispatched homolog 2 (Drosophila)                                       |
| GO | integral to membrane        | 177 | 3857 | 0.989 | 8604  | solute carrier family 25 (mitochondrial carrier, Aralar), member 12     |
| GO | integral to membrane        | 177 | 3857 | 0.989 | 8728  | ADAM metallopeptidase domain 19 (meltrin beta)                          |
| GO | integral to membrane        | 177 | 3857 | 0.989 | 8747  | ADAM metallopeptidase domain 21                                         |
| GO | integral to membrane        | 177 | 3857 | 0.989 | 8788  | delta-like 1 homolog (Drosophila)                                       |
| GO | integral to membrane        | 177 | 3857 | 0.989 | 90701 | SEC11 homolog C ( <i>S. cerevisiae</i> )                                |
| GO | integral to membrane        | 177 | 3857 | 0.989 | 9076  | claudin 1                                                               |
| GO | integral to membrane        | 177 | 3857 | 0.989 | 90871 | chromosome 9 open reading frame 123                                     |
| GO | integral to membrane        | 177 | 3857 | 0.989 | 91584 | plexin A4                                                               |
| GO | integral to membrane        | 177 | 3857 | 0.989 | 9215  | like-glycosyltransferase                                                |
| GO | integral to membrane        | 177 | 3857 | 0.989 | 92737 | delta/notch-like EGF repeat containing                                  |
| GO | integral to membrane        | 177 | 3857 | 0.989 | 9497  | solute carrier family 4, sodium bicarbonate cotransporter, member 7     |
| GO | integral to membrane        | 177 | 3857 | 0.989 | 9542  | neuregulin 2                                                            |
| GO | integral to membrane        | 177 | 3857 | 0.989 | 9653  | heparan sulfate 2-O-sulfotransferase 1                                  |
| GO | protein kinase binding      | 3   | 113  | 0.989 | 1000  | cadherin 2, type 1, N-cadherin (neuronal)                               |
| GO | protein kinase binding      | 3   | 113  | 0.989 | 3932  | lymphocyte-specific protein tyrosine kinase                             |
| GO | protein kinase binding      | 3   | 113  | 0.989 | 7137  | troponin I type 3 (cardiac)                                             |
| GO | protein phosphatase binding | 1   | 25   | 0.989 | 1000  | cadherin 2, type 1, N-cadherin (neuronal)                               |
| GO | membrane                    | 161 | 3643 | 0.989 | 10000 | v-akt murine thymoma viral oncogene homolog 3 (protein kinase B, gamma) |

|    |          |     |      |       |        |                                                                          |
|----|----------|-----|------|-------|--------|--------------------------------------------------------------------------|
| GO | membrane | 161 | 3643 | 0.989 | 1E+08  | transmembrane protein 194B                                               |
| GO | membrane | 161 | 3643 | 0.989 | 10254  | signal transducing adaptor molecule (SH3 domain and ITAM motif) 2        |
| GO | membrane | 161 | 3643 | 0.989 | 10391  | coronin, actin binding protein, 2B                                       |
| GO | membrane | 161 | 3643 | 0.989 | 10457  | glycoprotein (transmembrane) nmb                                         |
| GO | membrane | 161 | 3643 | 0.989 | 1047   | calmegin                                                                 |
| GO | membrane | 161 | 3643 | 0.989 | 10512  | sema domain, immunoglobulin domain (Ig), short basic domain, secreted, ( |
| GO | membrane | 161 | 3643 | 0.989 | 10683  | delta-like 3 (Drosophila)                                                |
| GO | membrane | 161 | 3643 | 0.989 | 11010  | GLI pathogenesis-related 1                                               |
| GO | membrane | 161 | 3643 | 0.989 | 11154  | adaptor-related protein complex 4, sigma 1 subunit                       |
| GO | membrane | 161 | 3643 | 0.989 | 11226  | UDP-N-acetyl-alpha-D-galactosamine:polypeptide N-acetylgalactosaminyltr  |
| GO | membrane | 161 | 3643 | 0.989 | 11227  | UDP-N-acetyl-alpha-D-galactosamine:polypeptide N-acetylgalactosaminyltr  |
| GO | membrane | 161 | 3643 | 0.989 | 11259  | filamin A interacting protein 1-like                                     |
| GO | membrane | 161 | 3643 | 0.989 | 112616 | CKLF-like MARVEL transmembrane domain containing 7                       |
| GO | membrane | 161 | 3643 | 0.989 | 114805 | UDP-N-acetyl-alpha-D-galactosamine:polypeptide N-acetylgalactosaminyltr  |
| GO | membrane | 161 | 3643 | 0.989 | 123920 | CKLF-like MARVEL transmembrane domain containing 3                       |
| GO | membrane | 161 | 3643 | 0.989 | 127670 | transmembrane epididymal protein 1                                       |
| GO | membrane | 161 | 3643 | 0.989 | 13     | arylacetamide deacetylase (esterase)                                     |
| GO | membrane | 161 | 3643 | 0.989 | 130507 | ubiquitin protein ligase E3 component n-recognin 3 (putative)            |
| GO | membrane | 161 | 3643 | 0.989 | 132724 | transmembrane protease, serine 11B                                       |
| GO | membrane | 161 | 3643 | 0.989 | 134145 | family with sequence similarity 173, member B                            |
| GO | membrane | 161 | 3643 | 0.989 | 134285 | transmembrane protein 171                                                |
| GO | membrane | 161 | 3643 | 0.989 | 1379   | complement component (3b/4b) receptor 1-like                             |
| GO | membrane | 161 | 3643 | 0.989 | 138255 | chromosome 9 open reading frame 135                                      |
| GO | membrane | 161 | 3643 | 0.989 | 144448 | tetraspanin 19                                                           |
| GO | membrane | 161 | 3643 | 0.989 | 145173 | beta 1,3-galactosyltransferase-like                                      |
| GO | membrane | 161 | 3643 | 0.989 | 147645 | V-set and immunoglobulin domain containing 10 like                       |
| GO | membrane | 161 | 3643 | 0.989 | 151188 | ADP-ribosylation-like factor 6 interacting protein 6                     |
| GO | membrane | 161 | 3643 | 0.989 | 151194 | family with sequence similarity 119, member A                            |
| GO | membrane | 161 | 3643 | 0.989 | 152007 | GLI pathogenesis-related 2                                               |
| GO | membrane | 161 | 3643 | 0.989 | 1543   | cytochrome P450, family 1, subfamily A, polypeptide 1                    |
| GO | membrane | 161 | 3643 | 0.989 | 157753 | transmembrane protein 74                                                 |
| GO | membrane | 161 | 3643 | 0.989 | 162494 | rhomoid, veinlet-like 3 (Drosophila)                                     |
| GO | membrane | 161 | 3643 | 0.989 | 166336 | prickle homolog 2 (Drosophila)                                           |
| GO | membrane | 161 | 3643 | 0.989 | 182    | jagged 1 (Alagille syndrome)                                             |
| GO | membrane | 161 | 3643 | 0.989 | 1836   | solute carrier family 26 (sulfate transporter), member 2                 |
| GO | membrane | 161 | 3643 | 0.989 | 1984   | eukaryotic translation initiation factor 5A                              |

|    |          |     |      |       |        |                                                                            |
|----|----------|-----|------|-------|--------|----------------------------------------------------------------------------|
| GO | membrane | 161 | 3643 | 0.989 | 201780 | solute carrier family 10 (sodium/bile acid cotransporter family), member 4 |
| GO | membrane | 161 | 3643 | 0.989 | 205251 | non-protein coding RNA 116                                                 |
| GO | membrane | 161 | 3643 | 0.989 | 2135   | exostoses (multiple)-like 2                                                |
| GO | membrane | 161 | 3643 | 0.989 | 221687 | ring finger protein 182                                                    |
| GO | membrane | 161 | 3643 | 0.989 | 22801  | integrin, alpha 11                                                         |
| GO | membrane | 161 | 3643 | 0.989 | 23138  | Nedd4 binding protein 3                                                    |
| GO | membrane | 161 | 3643 | 0.989 | 23245  | astrotactin 2                                                              |
| GO | membrane | 161 | 3643 | 0.989 | 23768  | fibronectin leucine rich transmembrane protein 2                           |
| GO | membrane | 161 | 3643 | 0.989 | 241    | arachidonate 5-lipoxygenase-activating protein                             |
| GO | membrane | 161 | 3643 | 0.989 | 253559 | cell adhesion molecule 2                                                   |
| GO | membrane | 161 | 3643 | 0.989 | 255027 | MPV17 mitochondrial membrane protein-like                                  |
| GO | membrane | 161 | 3643 | 0.989 | 25758  | chromosome 11 open reading frame 41                                        |
| GO | membrane | 161 | 3643 | 0.989 | 25789  | transmembrane protein 59-like                                              |
| GO | membrane | 161 | 3643 | 0.989 | 25817  | family with sequence similarity 19 (chemokine (C-C motif)-like), member A' |
| GO | membrane | 161 | 3643 | 0.989 | 25953  | paroxysmal nonkinesigenic dyskinesia                                       |
| GO | membrane | 161 | 3643 | 0.989 | 26032  | sushi domain containing 5                                                  |
| GO | membrane | 161 | 3643 | 0.989 | 26154  | ATP-binding cassette, sub-family A (ABC1), member 12                       |
| GO | membrane | 161 | 3643 | 0.989 | 2628   | glycine amidinotransferase (L-arginine:glycine amidinotransferase)         |
| GO | membrane | 161 | 3643 | 0.989 | 26519  | translocase of inner mitochondrial membrane 10 homolog (yeast)             |
| GO | membrane | 161 | 3643 | 0.989 | 26521  | translocase of inner mitochondrial membrane 8 homolog B (yeast)            |
| GO | membrane | 161 | 3643 | 0.989 | 27065  | DNA segment on chromosome 4 (unique) 234 expressed sequence                |
| GO | membrane | 161 | 3643 | 0.989 | 27429  | HtrA serine peptidase 2                                                    |
| GO | membrane | 161 | 3643 | 0.989 | 27445  | piccolo (presynaptic cytomatrix protein)                                   |
| GO | membrane | 161 | 3643 | 0.989 | 283455 | kinase suppressor of ras 2                                                 |
| GO | membrane | 161 | 3643 | 0.989 | 283518 | potassium channel regulator                                                |
| GO | membrane | 161 | 3643 | 0.989 | 284415 | V-set and transmembrane domain containing 1                                |
| GO | membrane | 161 | 3643 | 0.989 | 284417 | transmembrane protein 150B                                                 |
| GO | membrane | 161 | 3643 | 0.989 | 285761 | discoidin, CUB and LCCL domain containing 1                                |
| GO | membrane | 161 | 3643 | 0.989 | 286234 | chromosome 9 open reading frame 79                                         |
| GO | membrane | 161 | 3643 | 0.989 | 29842  | transcription factor CP2-like 1                                            |
| GO | membrane | 161 | 3643 | 0.989 | 29940  | dermatan sulfate epimerase                                                 |
| GO | membrane | 161 | 3643 | 0.989 | 3037   | hyaluronan synthase 2                                                      |
| GO | membrane | 161 | 3643 | 0.989 | 339761 | cytochrome P450, family 27, subfamily C, polypeptide 1                     |
| GO | membrane | 161 | 3643 | 0.989 | 344838 | progesterin and adipoQ receptor family member IX                           |
| GO | membrane | 161 | 3643 | 0.989 | 348938 | NIPA-like domain containing 4                                              |
| GO | membrane | 161 | 3643 | 0.989 | 3694   | integrin, beta 6                                                           |

|    |          |     |      |       |        |                                                                                             |
|----|----------|-----|------|-------|--------|---------------------------------------------------------------------------------------------|
| GO | membrane | 161 | 3643 | 0.989 | 3754   | potassium voltage-gated channel, subfamily F, member 1                                      |
| GO | membrane | 161 | 3643 | 0.989 | 3756   | potassium voltage-gated channel, subfamily H (eag-related), member 1                        |
| GO | membrane | 161 | 3643 | 0.989 | 388394 | reprimin-like                                                                               |
| GO | membrane | 161 | 3643 | 0.989 | 400451 | family with sequence similarity 174, member B                                               |
| GO | membrane | 161 | 3643 | 0.989 | 4709   | NADH dehydrogenase (ubiquinone) 1 beta subcomplex, 3, 12kDa                                 |
| GO | membrane | 161 | 3643 | 0.989 | 479    | ATPase, H <sup>+</sup> /K <sup>+</sup> transporting, nongastric, alpha polypeptide          |
| GO | membrane | 161 | 3643 | 0.989 | 4867   | nephronophthisis 1 (juvenile)                                                               |
| GO | membrane | 161 | 3643 | 0.989 | 4928   | nucleoporin 98kDa                                                                           |
| GO | membrane | 161 | 3643 | 0.989 | 5026   | purinergic receptor P2X, ligand-gated ion channel, 5                                        |
| GO | membrane | 161 | 3643 | 0.989 | 51062  | atlastin GTPase 1                                                                           |
| GO | membrane | 161 | 3643 | 0.989 | 51136  | ring finger protein, transmembrane 1                                                        |
| GO | membrane | 161 | 3643 | 0.989 | 51308  | receptor accessory protein 2                                                                |
| GO | membrane | 161 | 3643 | 0.989 | 51382  | ATPase, H <sup>+</sup> transporting, lysosomal 34kDa, V1 subunit D                          |
| GO | membrane | 161 | 3643 | 0.989 | 5140   | phosphodiesterase 3B, cGMP-inhibited                                                        |
| GO | membrane | 161 | 3643 | 0.989 | 516    | ATP synthase, H <sup>+</sup> transporting, mitochondrial F0 complex, subunit C1 (subunit c) |
| GO | membrane | 161 | 3643 | 0.989 | 5228   | placental growth factor                                                                     |
| GO | membrane | 161 | 3643 | 0.989 | 5245   | prohibitin                                                                                  |
| GO | membrane | 161 | 3643 | 0.989 | 53340  | sperm autoantigenic protein 17                                                              |
| GO | membrane | 161 | 3643 | 0.989 | 54733  | solute carrier family 35, member F2                                                         |
| GO | membrane | 161 | 3643 | 0.989 | 55016  | membrane-associated ring finger (C3HC4) 1                                                   |
| GO | membrane | 161 | 3643 | 0.989 | 55028  | chromosome 17 open reading frame 80                                                         |
| GO | membrane | 161 | 3643 | 0.989 | 55207  | ADP-ribosylation factor-like 8B                                                             |
| GO | membrane | 161 | 3643 | 0.989 | 554279 | chromosome 1 open reading frame 98                                                          |
| GO | membrane | 161 | 3643 | 0.989 | 558    | AXL receptor tyrosine kinase                                                                |
| GO | membrane | 161 | 3643 | 0.989 | 56241  | sushi domain containing 2                                                                   |
| GO | membrane | 161 | 3643 | 0.989 | 56479  | potassium voltage-gated channel, KQT-like subfamily, member 5                               |
| GO | membrane | 161 | 3643 | 0.989 | 57099  | apoptosis, caspase activation inhibitor                                                     |
| GO | membrane | 161 | 3643 | 0.989 | 57168  | aspartate beta-hydroxylase domain containing 2                                              |
| GO | membrane | 161 | 3643 | 0.989 | 57484  | ring finger protein 150                                                                     |
| GO | membrane | 161 | 3643 | 0.989 | 5754   | PTK7 protein tyrosine kinase 7                                                              |
| GO | membrane | 161 | 3643 | 0.989 | 57574  | membrane-associated ring finger (C3HC4) 4                                                   |
| GO | membrane | 161 | 3643 | 0.989 | 57650  | KIAA1524                                                                                    |
| GO | membrane | 161 | 3643 | 0.989 | 57678  | glycerol-3-phosphate acyltransferase, mitochondrial                                         |
| GO | membrane | 161 | 3643 | 0.989 | 581    | BCL2-associated X protein                                                                   |
| GO | membrane | 161 | 3643 | 0.989 | 590    | butyrylcholinesterase                                                                       |
| GO | membrane | 161 | 3643 | 0.989 | 60386  | solute carrier family 25 (mitochondrial thiamine pyrophosphate carrier), member 1           |

|    |          |     |      |       |        |                                                                              |
|----|----------|-----|------|-------|--------|------------------------------------------------------------------------------|
| GO | membrane | 161 | 3643 | 0.989 | 60492  | coiled-coil domain containing 90B                                            |
| GO | membrane | 161 | 3643 | 0.989 | 6335   | sodium channel, voltage-gated, type IX, alpha subunit                        |
| GO | membrane | 161 | 3643 | 0.989 | 64131  | xylosyltransferase I                                                         |
| GO | membrane | 161 | 3643 | 0.989 | 64208  | popeye domain containing 3                                                   |
| GO | membrane | 161 | 3643 | 0.989 | 64417  | chromosome 5 open reading frame 28                                           |
| GO | membrane | 161 | 3643 | 0.989 | 64747  | major facilitator superfamily domain containing 1                            |
| GO | membrane | 161 | 3643 | 0.989 | 65055  | receptor accessory protein 1                                                 |
| GO | membrane | 161 | 3643 | 0.989 | 65062  | amyotrophic lateral sclerosis 2 (juvenile) chromosome region, candidate 4    |
| GO | membrane | 161 | 3643 | 0.989 | 6527   | solute carrier family 5 (low affinity glucose cotransporter), member 4       |
| GO | membrane | 161 | 3643 | 0.989 | 6549   | solute carrier family 9 (sodium/hydrogen exchanger), member 2                |
| GO | membrane | 161 | 3643 | 0.989 | 66000  | transmembrane protein 108                                                    |
| GO | membrane | 161 | 3643 | 0.989 | 6683   | spastin                                                                      |
| GO | membrane | 161 | 3643 | 0.989 | 6785   | elongation of very long chain fatty acids (FEN1/Elo2, SUR4/Elo3, yeast)-like |
| GO | membrane | 161 | 3643 | 0.989 | 6833   | ATP-binding cassette, sub-family C (CFTR/MRP), member 8                      |
| GO | membrane | 161 | 3643 | 0.989 | 7037   | transferrin receptor (p90, CD71)                                             |
| GO | membrane | 161 | 3643 | 0.989 | 729025 | solute carrier family 15, member 5                                           |
| GO | membrane | 161 | 3643 | 0.989 | 7341   | SMT3 suppressor of mif two 3 homolog 1 ( <i>S. cerevisiae</i> )              |
| GO | membrane | 161 | 3643 | 0.989 | 7348   | uropodin 1B                                                                  |
| GO | membrane | 161 | 3643 | 0.989 | 79071  | ELOVL family member 6, elongation of long chain fatty acids (FEN1/Elo2, SL   |
| GO | membrane | 161 | 3643 | 0.989 | 79135  | apolipoprotein O                                                             |
| GO | membrane | 161 | 3643 | 0.989 | 79623  | UDP-N-acetyl-alpha-D-galactosamine:polypeptide N-acetylgalactosaminyltr      |
| GO | membrane | 161 | 3643 | 0.989 | 79669  | chromosome 3 open reading frame 52                                           |
| GO | membrane | 161 | 3643 | 0.989 | 79993  | ELOVL family member 7, elongation of long chain fatty acids (yeast)          |
| GO | membrane | 161 | 3643 | 0.989 | 80342  | TRAF3 interacting protein 3                                                  |
| GO | membrane | 161 | 3643 | 0.989 | 81035  | collectin sub-family member 12                                               |
| GO | membrane | 161 | 3643 | 0.989 | 81562  | lectin, mannose-binding 2-like                                               |
| GO | membrane | 161 | 3643 | 0.989 | 81706  | protein phosphatase 1, regulatory (inhibitor) subunit 14C                    |
| GO | membrane | 161 | 3643 | 0.989 | 8325   | frizzled homolog 8 ( <i>Drosophila</i> )                                     |
| GO | membrane | 161 | 3643 | 0.989 | 83930  | STARD3 N-terminal like                                                       |
| GO | membrane | 161 | 3643 | 0.989 | 84189  | SLIT and NTRK-like family, member 6                                          |
| GO | membrane | 161 | 3643 | 0.989 | 84230  | leucine rich repeat containing 8 family, member C                            |
| GO | membrane | 161 | 3643 | 0.989 | 84620  | ST6 beta-galactosamide alpha-2,6-sialyltransferase 2                         |
| GO | membrane | 161 | 3643 | 0.989 | 84668  | family with sequence similarity 126, member A                                |
| GO | membrane | 161 | 3643 | 0.989 | 84752  | UDP-GlcNAc:betaGal beta-1,3-N-acetylglucosaminyltransferase 9                |
| GO | membrane | 161 | 3643 | 0.989 | 84769  | MPV17 mitochondrial membrane protein-like 2                                  |
| GO | membrane | 161 | 3643 | 0.989 | 84910  | transmembrane protein 87B                                                    |



|    |                                          |     |      |       |                                                                               |
|----|------------------------------------------|-----|------|-------|-------------------------------------------------------------------------------|
| GO | membrane                                 | 161 | 3643 | 0.989 | 85027 chromosome 5 open reading frame 62                                      |
| GO | membrane                                 | 161 | 3643 | 0.989 | 85455 dispatched homolog 2 (Drosophila)                                       |
| GO | membrane                                 | 161 | 3643 | 0.989 | 8604 solute carrier family 25 (mitochondrial carrier, Aralar), member 12      |
| GO | membrane                                 | 161 | 3643 | 0.989 | 8685 macrophage receptor with collagenous structure                           |
| GO | membrane                                 | 161 | 3643 | 0.989 | 8728 ADAM metallopeptidase domain 19 (meltrin beta)                           |
| GO | membrane                                 | 161 | 3643 | 0.989 | 8747 ADAM metallopeptidase domain 21                                          |
| GO | membrane                                 | 161 | 3643 | 0.989 | 8788 delta-like 1 homolog (Drosophila)                                        |
| GO | membrane                                 | 161 | 3643 | 0.989 | 8905 adaptor-related protein complex 1, sigma 2 subunit                       |
| GO | membrane                                 | 161 | 3643 | 0.989 | 90701 SEC11 homolog C (S. cerevisiae)                                         |
| GO | membrane                                 | 161 | 3643 | 0.989 | 90871 chromosome 9 open reading frame 123                                     |
| GO | membrane                                 | 161 | 3643 | 0.989 | 91942 NADH dehydrogenase (ubiquinone) 1 alpha subcomplex, assembly factor 2   |
| GO | membrane                                 | 161 | 3643 | 0.989 | 9215 like-glycosyltransferase                                                 |
| GO | membrane                                 | 161 | 3643 | 0.989 | 9420 cytochrome P450, family 7, subfamily B, polypeptide 1                    |
| GO | membrane                                 | 161 | 3643 | 0.989 | 9482 syntaxin 8                                                               |
| GO | membrane                                 | 161 | 3643 | 0.989 | 9653 heparan sulfate 2-O-sulfotransferase 1                                   |
| GO | membrane                                 | 161 | 3643 | 0.989 | 9732 dedicator of cytokinesis 4                                               |
| GO | protein kinase activity                  | 6   | 170  | 0.989 | 10000 v-akt murine thymoma viral oncogene homolog 3 (protein kinase B, gamma) |
| GO | protein kinase activity                  | 6   | 170  | 0.989 | 22868 FAST kinase domains 2                                                   |
| GO | protein kinase activity                  | 6   | 170  | 0.989 | 27330 ribosomal protein S6 kinase, 90kDa, polypeptide 6                       |
| GO | protein kinase activity                  | 6   | 170  | 0.989 | 2965 general transcription factor IIH, polypeptide 1, 62kDa                   |
| GO | protein kinase activity                  | 6   | 170  | 0.989 | 6347 chemokine (C-C motif) ligand 2                                           |
| GO | protein kinase activity                  | 6   | 170  | 0.989 | 7010 TEK tyrosine kinase, endothelial                                         |
| GO | protein serine/threonine kinase activity | 12  | 335  | 0.989 | 10000 v-akt murine thymoma viral oncogene homolog 3 (protein kinase B, gamma) |
| GO | protein serine/threonine kinase activity | 12  | 335  | 0.989 | 27330 ribosomal protein S6 kinase, 90kDa, polypeptide 6                       |
| GO | protein serine/threonine kinase activity | 12  | 335  | 0.989 | 283455 kinase suppressor of ras 2                                             |
| GO | protein serine/threonine kinase activity | 12  | 335  | 0.989 | 54822 transient receptor potential cation channel, subfamily M, member 7      |
| GO | protein serine/threonine kinase activity | 12  | 335  | 0.989 | 5588 protein kinase C, theta                                                  |
| GO | protein serine/threonine kinase activity | 12  | 335  | 0.989 | 57144 p21 protein (Cdc42/Rac)-activated kinase 7                              |
| GO | protein serine/threonine kinase activity | 12  | 335  | 0.989 | 659 bone morphogenetic protein receptor, type II (serine/threonine kinase)    |
| GO | protein serine/threonine kinase activity | 12  | 335  | 0.989 | 7046 transforming growth factor, beta receptor 1                              |
| GO | protein serine/threonine kinase activity | 12  | 335  | 0.989 | 8997 kalirin, RhoGEF kinase                                                   |
| GO | protein serine/threonine kinase activity | 12  | 335  | 0.989 | 9262 serine/threonine kinase 17b                                              |
| GO | protein serine/threonine kinase activity | 12  | 335  | 0.989 | 9448 mitogen-activated protein kinase kinase kinase kinase 4                  |
| GO | protein serine/threonine kinase activity | 12  | 335  | 0.989 | 9833 maternal embryonic leucine zipper kinase                                 |
| GO | signal transduction                      | 78  | 1796 | 0.989 | 10000 v-akt murine thymoma viral oncogene homolog 3 (protein kinase B, gamma) |
| GO | signal transduction                      | 78  | 1796 | 0.989 | 10293 TRAF interacting protein                                                |

|    |                     |    |      |       |        |                                                                               |
|----|---------------------|----|------|-------|--------|-------------------------------------------------------------------------------|
| GO | signal transduction | 78 | 1796 | 0.989 | 10395  | deleted in liver cancer 1                                                     |
| GO | signal transduction | 78 | 1796 | 0.989 | 10672  | guanine nucleotide binding protein (G protein), alpha 13                      |
| GO | signal transduction | 78 | 1796 | 0.989 | 10788  | IQ motif containing GTPase activating protein 2                               |
| GO | signal transduction | 78 | 1796 | 0.989 | 11142  | protein kinase (cAMP-dependent, catalytic) inhibitor gamma                    |
| GO | signal transduction | 78 | 1796 | 0.989 | 1123   | chimerin (chimaerin) 1                                                        |
| GO | signal transduction | 78 | 1796 | 0.989 | 1136   | cholinergic receptor, nicotinic, alpha 3                                      |
| GO | signal transduction | 78 | 1796 | 0.989 | 1138   | cholinergic receptor, nicotinic, alpha 5                                      |
| GO | signal transduction | 78 | 1796 | 0.989 | 119749 | olfactory receptor, family 4, subfamily C, member 46                          |
| GO | signal transduction | 78 | 1796 | 0.989 | 121268 | Ras homolog enriched in brain like 1                                          |
| GO | signal transduction | 78 | 1796 | 0.989 | 125962 | olfactory receptor, family 7, subfamily G, member 1                           |
| GO | signal transduction | 78 | 1796 | 0.989 | 162494 | rhomboid, veinlet-like 3 (Drosophila)                                         |
| GO | signal transduction | 78 | 1796 | 0.989 | 2149   | coagulation factor II (thrombin) receptor                                     |
| GO | signal transduction | 78 | 1796 | 0.989 | 2150   | coagulation factor II (thrombin) receptor-like 1                              |
| GO | signal transduction | 78 | 1796 | 0.989 | 2151   | coagulation factor II (thrombin) receptor-like 2                              |
| GO | signal transduction | 78 | 1796 | 0.989 | 222611 | G protein-coupled receptor 111                                                |
| GO | signal transduction | 78 | 1796 | 0.989 | 23432  | G protein-coupled receptor 161                                                |
| GO | signal transduction | 78 | 1796 | 0.989 | 2533   | FYN binding protein (FYB-120/130)                                             |
| GO | signal transduction | 78 | 1796 | 0.989 | 2558   | gamma-aminobutyric acid (GABA) A receptor, alpha 5                            |
| GO | signal transduction | 78 | 1796 | 0.989 | 26207  | phosphatidylinositol transfer protein, cytoplasmic 1                          |
| GO | signal transduction | 78 | 1796 | 0.989 | 26230  | T-cell lymphoma invasion and metastasis 2                                     |
| GO | signal transduction | 78 | 1796 | 0.989 | 27330  | ribosomal protein S6 kinase, 90kDa, polypeptide 6                             |
| GO | signal transduction | 78 | 1796 | 0.989 | 2774   | guanine nucleotide binding protein (G protein), alpha activating activity pol |
| GO | signal transduction | 78 | 1796 | 0.989 | 2786   | guanine nucleotide binding protein (G protein), gamma 4                       |
| GO | signal transduction | 78 | 1796 | 0.989 | 282770 | olfactory receptor, family 10, subfamily AG, member 1                         |
| GO | signal transduction | 78 | 1796 | 0.989 | 283111 | olfactory receptor, family 51, subfamily V, member 1                          |
| GO | signal transduction | 78 | 1796 | 0.989 | 2842   | G protein-coupled receptor 19                                                 |
| GO | signal transduction | 78 | 1796 | 0.989 | 2845   | G protein-coupled receptor 22                                                 |
| GO | signal transduction | 78 | 1796 | 0.989 | 2850   | G protein-coupled receptor 27                                                 |
| GO | signal transduction | 78 | 1796 | 0.989 | 285659 | olfactory receptor, family 2, subfamily V, member 2                           |
| GO | signal transduction | 78 | 1796 | 0.989 | 2863   | G protein-coupled receptor 39                                                 |
| GO | signal transduction | 78 | 1796 | 0.989 | 287    | ankyrin 2, neuronal                                                           |
| GO | signal transduction | 78 | 1796 | 0.989 | 2906   | glutamate receptor, ionotropic, N-methyl D-aspartate 2D                       |
| GO | signal transduction | 78 | 1796 | 0.989 | 355    | Fas (TNF receptor superfamily, member 6)                                      |
| GO | signal transduction | 78 | 1796 | 0.989 | 3756   | potassium voltage-gated channel, subfamily H (eag-related), member 1          |
| GO | signal transduction | 78 | 1796 | 0.989 | 390061 | olfactory receptor, family 51, subfamily Q, member 1                          |
| GO | signal transduction | 78 | 1796 | 0.989 | 391114 | olfactory receptor, family 6, subfamily K, member 3                           |

|    |                     |    |      |       |                                                                                |
|----|---------------------|----|------|-------|--------------------------------------------------------------------------------|
| GO | signal transduction | 78 | 1796 | 0.989 | 3952 leptin                                                                    |
| GO | signal transduction | 78 | 1796 | 0.989 | 406 aryl hydrocarbon receptor nuclear translocator-like                        |
| GO | signal transduction | 78 | 1796 | 0.989 | 4158 melanocortin 2 receptor (adrenocorticotrophic hormone)                    |
| GO | signal transduction | 78 | 1796 | 0.989 | 4651 myosin X                                                                  |
| GO | signal transduction | 78 | 1796 | 0.989 | 4763 neurofibromin 1                                                           |
| GO | signal transduction | 78 | 1796 | 0.989 | 4867 nephronophthisis 1 (juvenile)                                             |
| GO | signal transduction | 78 | 1796 | 0.989 | 4893 neuroblastoma RAS viral (v-ras) oncogene homolog                          |
| GO | signal transduction | 78 | 1796 | 0.989 | 5021 oxytocin receptor                                                         |
| GO | signal transduction | 78 | 1796 | 0.989 | 5026 purinergic receptor P2X, ligand-gated ion channel, 5                      |
| GO | signal transduction | 78 | 1796 | 0.989 | 5028 purinergic receptor P2Y, G-protein coupled, 1                             |
| GO | signal transduction | 78 | 1796 | 0.989 | 5031 pyrimidinergic receptor P2Y, G-protein coupled, 6                         |
| GO | signal transduction | 78 | 1796 | 0.989 | 50940 phosphodiesterase 11A                                                    |
| GO | signal transduction | 78 | 1796 | 0.989 | 5140 phosphodiesterase 3B, cGMP-inhibited                                      |
| GO | signal transduction | 78 | 1796 | 0.989 | 5145 phosphodiesterase 6A, cGMP-specific, rod, alpha                           |
| GO | signal transduction | 78 | 1796 | 0.989 | 51676 ankyrin repeat and SOCS box-containing 2                                 |
| GO | signal transduction | 78 | 1796 | 0.989 | 5228 placental growth factor                                                   |
| GO | signal transduction | 78 | 1796 | 0.989 | 5245 prohibitin                                                                |
| GO | signal transduction | 78 | 1796 | 0.989 | 53340 sperm autoantigenic protein 17                                           |
| GO | signal transduction | 78 | 1796 | 0.989 | 53637 sphingosine-1-phosphate receptor 5                                       |
| GO | signal transduction | 78 | 1796 | 0.989 | 54331 guanine nucleotide binding protein (G protein), gamma 2                  |
| GO | signal transduction | 78 | 1796 | 0.989 | 55789 DEP domain containing 1B                                                 |
| GO | signal transduction | 78 | 1796 | 0.989 | 558 AXL receptor tyrosine kinase                                               |
| GO | signal transduction | 78 | 1796 | 0.989 | 5754 PTK7 protein tyrosine kinase 7                                            |
| GO | signal transduction | 78 | 1796 | 0.989 | 59345 guanine nucleotide binding protein (G protein), beta polypeptide 4       |
| GO | signal transduction | 78 | 1796 | 0.989 | 6242 rhotekin                                                                  |
| GO | signal transduction | 78 | 1796 | 0.989 | 6251 Ras suppressor protein 1                                                  |
| GO | signal transduction | 78 | 1796 | 0.989 | 6347 chemokine (C-C motif) ligand 2                                            |
| GO | signal transduction | 78 | 1796 | 0.989 | 6422 secreted frizzled-related protein 1                                       |
| GO | signal transduction | 78 | 1796 | 0.989 | 6695 sparco/osteonectin, cwcv and kazal-like domains proteoglycan (testican) 1 |
| GO | signal transduction | 78 | 1796 | 0.989 | 7010 TEK tyrosine kinase, endothelial                                          |
| GO | signal transduction | 78 | 1796 | 0.989 | 7046 transforming growth factor, beta receptor 1                               |
| GO | signal transduction | 78 | 1796 | 0.989 | 729230 chemokine (C-C motif) receptor 2                                        |
| GO | signal transduction | 78 | 1796 | 0.989 | 7481 wingless-type MMTV integration site family, member 11                     |
| GO | signal transduction | 78 | 1796 | 0.989 | 8325 frizzled homolog 8 (Drosophila)                                           |
| GO | signal transduction | 78 | 1796 | 0.989 | 8533 COP9 constitutive photomorphogenic homolog subunit 3 (Arabidopsis)        |
| GO | signal transduction | 78 | 1796 | 0.989 | 8536 calcium/calmodulin-dependent protein kinase I                             |

|    |                                         |    |      |       |        |                                                                             |
|----|-----------------------------------------|----|------|-------|--------|-----------------------------------------------------------------------------|
| GO | signal transduction                     | 78 | 1796 | 0.989 | 8997   | kalirin, RhoGEF kinase                                                      |
| GO | signal transduction                     | 78 | 1796 | 0.989 | 91584  | plexin A4                                                                   |
| GO | signal transduction                     | 78 | 1796 | 0.989 | 9542   | neuregulin 2                                                                |
| GO | signal transduction                     | 78 | 1796 | 0.989 | 9568   | gamma-aminobutyric acid (GABA) B receptor, 2                                |
| GO | regulation of transcription, DNA-depend | 32 | 1013 | 0.989 | 1E+08  | forkhead box O6                                                             |
| GO | regulation of transcription, DNA-depend | 32 | 1013 | 0.989 | 1045   | caudal type homeobox 2                                                      |
| GO | regulation of transcription, DNA-depend | 32 | 1013 | 0.989 | 139324 | highly divergent homeobox                                                   |
| GO | regulation of transcription, DNA-depend | 32 | 1013 | 0.989 | 1746   | distal-less homeobox 2                                                      |
| GO | regulation of transcription, DNA-depend | 32 | 1013 | 0.989 | 2305   | forkhead box M1                                                             |
| GO | regulation of transcription, DNA-depend | 32 | 1013 | 0.989 | 3224   | homeobox C8                                                                 |
| GO | regulation of transcription, DNA-depend | 32 | 1013 | 0.989 | 3236   | homeobox D10                                                                |
| GO | regulation of transcription, DNA-depend | 32 | 1013 | 0.989 | 3237   | homeobox D11                                                                |
| GO | regulation of transcription, DNA-depend | 32 | 1013 | 0.989 | 344191 | even-skipped homeobox 2                                                     |
| GO | regulation of transcription, DNA-depend | 32 | 1013 | 0.989 | 3756   | potassium voltage-gated channel, subfamily H (eag-related), member 1        |
| GO | regulation of transcription, DNA-depend | 32 | 1013 | 0.989 | 389421 | lin-28 homolog B (C. elegans)                                               |
| GO | regulation of transcription, DNA-depend | 32 | 1013 | 0.989 | 3975   | LIM homeobox 1                                                              |
| GO | regulation of transcription, DNA-depend | 32 | 1013 | 0.989 | 406    | aryl hydrocarbon receptor nuclear translocator-like                         |
| GO | regulation of transcription, DNA-depend | 32 | 1013 | 0.989 | 4094   | v-maf musculoaponeurotic fibrosarcoma oncogene homolog (avian)              |
| GO | regulation of transcription, DNA-depend | 32 | 1013 | 0.989 | 431707 | LIM homeobox 8                                                              |
| GO | regulation of transcription, DNA-depend | 32 | 1013 | 0.989 | 4603   | v-myb myeloblastosis viral oncogene homolog (avian)-like 1                  |
| GO | regulation of transcription, DNA-depend | 32 | 1013 | 0.989 | 5015   | orthodenticle homeobox 2                                                    |
| GO | regulation of transcription, DNA-depend | 32 | 1013 | 0.989 | 5081   | paired box 7                                                                |
| GO | regulation of transcription, DNA-depend | 32 | 1013 | 0.989 | 54993  | zinc finger and SCAN domain containing 2                                    |
| GO | regulation of transcription, DNA-depend | 32 | 1013 | 0.989 | 6474   | short stature homeobox 2                                                    |
| GO | regulation of transcription, DNA-depend | 32 | 1013 | 0.989 | 6657   | SRY (sex determining region Y)-box 2                                        |
| GO | regulation of transcription, DNA-depend | 32 | 1013 | 0.989 | 6659   | SRY (sex determining region Y)-box 4                                        |
| GO | regulation of transcription, DNA-depend | 32 | 1013 | 0.989 | 7021   | transcription factor AP-2 beta (activating enhancer binding protein 2 beta) |
| GO | regulation of transcription, DNA-depend | 32 | 1013 | 0.989 | 7029   | transcription factor Dp-2 (E2F dimerization partner 2)                      |
| GO | regulation of transcription, DNA-depend | 32 | 1013 | 0.989 | 7490   | Wilms tumor 1                                                               |
| GO | regulation of transcription, DNA-depend | 32 | 1013 | 0.989 | 7711   | zinc finger protein 155                                                     |
| GO | regulation of transcription, DNA-depend | 32 | 1013 | 0.989 | 80712  | ESX homeobox 1                                                              |
| GO | regulation of transcription, DNA-depend | 32 | 1013 | 0.989 | 8091   | high mobility group AT-hook 2                                               |
| GO | regulation of transcription, DNA-depend | 32 | 1013 | 0.989 | 91975  | zinc finger protein 300                                                     |
| GO | regulation of transcription, DNA-depend | 32 | 1013 | 0.989 | 93474  | zinc finger protein 670                                                     |
| GO | regulation of transcription, DNA-depend | 32 | 1013 | 0.989 | 9355   | LIM homeobox 2                                                              |
| GO | regulation of transcription, DNA-depend | 32 | 1013 | 0.989 | 9839   | zinc finger E-box binding homeobox 2                                        |

|    |                               |    |     |       |        |                                                                             |
|----|-------------------------------|----|-----|-------|--------|-----------------------------------------------------------------------------|
| GO | transcription factor activity | 39 | 922 | 0.989 | 1E+08  | forkhead box O6                                                             |
| GO | transcription factor activity | 39 | 922 | 0.989 | 1045   | caudal type homeobox 2                                                      |
| GO | transcription factor activity | 39 | 922 | 0.989 | 10474  | transcriptional adaptor 3                                                   |
| GO | transcription factor activity | 39 | 922 | 0.989 | 11278  | Kruppel-like factor 12                                                      |
| GO | transcription factor activity | 39 | 922 | 0.989 | 132625 | zinc finger protein 42 homolog (mouse)                                      |
| GO | transcription factor activity | 39 | 922 | 0.989 | 139324 | highly divergent homeobox                                                   |
| GO | transcription factor activity | 39 | 922 | 0.989 | 1746   | distal-less homeobox 2                                                      |
| GO | transcription factor activity | 39 | 922 | 0.989 | 195828 | zinc finger protein 367                                                     |
| GO | transcription factor activity | 39 | 922 | 0.989 | 2305   | forkhead box M1                                                             |
| GO | transcription factor activity | 39 | 922 | 0.989 | 2736   | GLI family zinc finger 2                                                    |
| GO | transcription factor activity | 39 | 922 | 0.989 | 29128  | ubiquitin-like with PHD and ring finger domains 1                           |
| GO | transcription factor activity | 39 | 922 | 0.989 | 29842  | transcription factor CP2-like 1                                             |
| GO | transcription factor activity | 39 | 922 | 0.989 | 3224   | homeobox C8                                                                 |
| GO | transcription factor activity | 39 | 922 | 0.989 | 3236   | homeobox D10                                                                |
| GO | transcription factor activity | 39 | 922 | 0.989 | 3237   | homeobox D11                                                                |
| GO | transcription factor activity | 39 | 922 | 0.989 | 344191 | even-skipped homeobox 2                                                     |
| GO | transcription factor activity | 39 | 922 | 0.989 | 3516   | recombination signal binding protein for immunoglobulin kappa J region      |
| GO | transcription factor activity | 39 | 922 | 0.989 | 3975   | LIM homeobox 1                                                              |
| GO | transcription factor activity | 39 | 922 | 0.989 | 406    | aryl hydrocarbon receptor nuclear translocator-like                         |
| GO | transcription factor activity | 39 | 922 | 0.989 | 4094   | v-maf musculoaponeurotic fibrosarcoma oncogene homolog (avian)              |
| GO | transcription factor activity | 39 | 922 | 0.989 | 431707 | LIM homeobox 8                                                              |
| GO | transcription factor activity | 39 | 922 | 0.989 | 5015   | orthodenticle homeobox 2                                                    |
| GO | transcription factor activity | 39 | 922 | 0.989 | 5081   | paired box 7                                                                |
| GO | transcription factor activity | 39 | 922 | 0.989 | 54993  | zinc finger and SCAN domain containing 2                                    |
| GO | transcription factor activity | 39 | 922 | 0.989 | 6299   | sal-like 1 (Drosophila)                                                     |
| GO | transcription factor activity | 39 | 922 | 0.989 | 6474   | short stature homeobox 2                                                    |
| GO | transcription factor activity | 39 | 922 | 0.989 | 6657   | SRY (sex determining region Y)-box 2                                        |
| GO | transcription factor activity | 39 | 922 | 0.989 | 6659   | SRY (sex determining region Y)-box 4                                        |
| GO | transcription factor activity | 39 | 922 | 0.989 | 6662   | SRY (sex determining region Y)-box 9                                        |
| GO | transcription factor activity | 39 | 922 | 0.989 | 6899   | T-box 1                                                                     |
| GO | transcription factor activity | 39 | 922 | 0.989 | 7021   | transcription factor AP-2 beta (activating enhancer binding protein 2 beta) |
| GO | transcription factor activity | 39 | 922 | 0.989 | 7029   | transcription factor Dp-2 (E2F dimerization partner 2)                      |
| GO | transcription factor activity | 39 | 922 | 0.989 | 7490   | Wilms tumor 1                                                               |
| GO | transcription factor activity | 39 | 922 | 0.989 | 7711   | zinc finger protein 155                                                     |
| GO | transcription factor activity | 39 | 922 | 0.989 | 80712  | ESX homeobox 1                                                              |
| GO | transcription factor activity | 39 | 922 | 0.989 | 8626   | tumor protein p63                                                           |

|    |                               |    |     |       |        |                                                                             |
|----|-------------------------------|----|-----|-------|--------|-----------------------------------------------------------------------------|
| GO | transcription factor activity | 39 | 922 | 0.989 | 9242   | musculin (activated B-cell factor-1)                                        |
| GO | transcription factor activity | 39 | 922 | 0.989 | 9355   | LIM homeobox 2                                                              |
| GO | transcription factor activity | 39 | 922 | 0.989 | 9839   | zinc finger E-box binding homeobox 2                                        |
| GO | transport                     | 21 | 511 | 0.989 | 10052  | gap junction protein, gamma 1, 45kDa                                        |
| GO | transport                     | 21 | 511 | 0.989 | 10189  | THO complex 4                                                               |
| GO | transport                     | 21 | 511 | 0.989 | 1138   | cholinergic receptor, nicotinic, alpha 5                                    |
| GO | transport                     | 21 | 511 | 0.989 | 114757 | cytoglobin                                                                  |
| GO | transport                     | 21 | 511 | 0.989 | 116362 | retinol binding protein 7, cellular                                         |
| GO | transport                     | 21 | 511 | 0.989 | 1622   | diazepam binding inhibitor (GABA receptor modulator, acyl-Coenzyme A bi     |
| GO | transport                     | 21 | 511 | 0.989 | 1781   | dynein, cytoplasmic 1, intermediate chain 2                                 |
| GO | transport                     | 21 | 511 | 0.989 | 2171   | fatty acid binding protein 5 (psoriasis-associated)                         |
| GO | transport                     | 21 | 511 | 0.989 | 2172   | fatty acid binding protein 6, ileal                                         |
| GO | transport                     | 21 | 511 | 0.989 | 2232   | ferredoxin reductase                                                        |
| GO | transport                     | 21 | 511 | 0.989 | 2558   | gamma-aminobutyric acid (GABA) A receptor, alpha 5                          |
| GO | transport                     | 21 | 511 | 0.989 | 27445  | piccolo (presynaptic cytomatrix protein)                                    |
| GO | transport                     | 21 | 511 | 0.989 | 2898   | glutamate receptor, ionotropic, kainate 2                                   |
| GO | transport                     | 21 | 511 | 0.989 | 4709   | NADH dehydrogenase (ubiquinone) 1 beta subcomplex, 3, 12kDa                 |
| GO | transport                     | 21 | 511 | 0.989 | 4884   | neuronal pentraxin I                                                        |
| GO | transport                     | 21 | 511 | 0.989 | 5026   | purinergic receptor P2X, ligand-gated ion channel, 5                        |
| GO | transport                     | 21 | 511 | 0.989 | 54733  | solute carrier family 35, member F2                                         |
| GO | transport                     | 21 | 511 | 0.989 | 5947   | retinol binding protein 1, cellular                                         |
| GO | transport                     | 21 | 511 | 0.989 | 8563   | THO complex 5                                                               |
| GO | transport                     | 21 | 511 | 0.989 | 9482   | syntaxin 8                                                                  |
| GO | transport                     | 21 | 511 | 0.989 | 9635   | chloride channel accessory 2                                                |
| GO | metabolic process             | 20 | 455 | 0.989 | 10055  | SUMO1 activating enzyme subunit 1                                           |
| GO | metabolic process             | 20 | 455 | 0.989 | 10893  | matrix metalloproteinase 24 (membrane-inserted)                             |
| GO | metabolic process             | 20 | 455 | 0.989 | 13     | arylacetamide deacetylase (esterase)                                        |
| GO | metabolic process             | 20 | 455 | 0.989 | 2139   | eyes absent homolog 2 (Drosophila)                                          |
| GO | metabolic process             | 20 | 455 | 0.989 | 221357 | glutathione S-transferase alpha 5                                           |
| GO | metabolic process             | 20 | 455 | 0.989 | 23305  | acyl-CoA synthetase long-chain family member 6                              |
| GO | metabolic process             | 20 | 455 | 0.989 | 26275  | 3-hydroxyisobutyryl-Coenzyme A hydrolase                                    |
| GO | metabolic process             | 20 | 455 | 0.989 | 3157   | 3-hydroxy-3-methylglutaryl-Coenzyme A synthase 1 (soluble)                  |
| GO | metabolic process             | 20 | 455 | 0.989 | 3778   | potassium large conductance calcium-activated channel, subfamily M, alph    |
| GO | metabolic process             | 20 | 455 | 0.989 | 411    | arylsulfatase B                                                             |
| GO | metabolic process             | 20 | 455 | 0.989 | 4312   | matrix metalloproteinase 1 (interstitial collagenase)                       |
| GO | metabolic process             | 20 | 455 | 0.989 | 4318   | matrix metalloproteinase 9 (gelatinase B, 92kDa gelatinase, 92kDa type IV c |

|    |                              |    |      |       |        |                                                                                    |
|----|------------------------------|----|------|-------|--------|------------------------------------------------------------------------------------|
| GO | metabolic process            | 20 | 455  | 0.989 | 4319   | matrix metalloproteinase 10 (stromelysin 2)                                        |
| GO | metabolic process            | 20 | 455  | 0.989 | 479    | ATPase, H <sup>+</sup> /K <sup>+</sup> transporting, nongastric, alpha polypeptide |
| GO | metabolic process            | 20 | 455  | 0.989 | 4968   | 8-oxoguanine DNA glycosylase                                                       |
| GO | metabolic process            | 20 | 455  | 0.989 | 57103  | chromosome 12 open reading frame 5                                                 |
| GO | metabolic process            | 20 | 455  | 0.989 | 57678  | glycerol-3-phosphate acyltransferase, mitochondrial                                |
| GO | metabolic process            | 20 | 455  | 0.989 | 586    | branched chain aminotransferase 1, cytosolic                                       |
| GO | metabolic process            | 20 | 455  | 0.989 | 6120   | ribulose-5-phosphate-3-epimerase                                                   |
| GO | metabolic process            | 20 | 455  | 0.989 | 669    | 2,3-bisphosphoglycerate mutase                                                     |
| GO | protein modification process | 6  | 145  | 0.989 | 10055  | SUMO1 activating enzyme subunit 1                                                  |
| GO | protein modification process | 6  | 145  | 0.989 | 25827  | F-box and leucine-rich repeat protein 2                                            |
| GO | protein modification process | 6  | 145  | 0.989 | 26263  | F-box protein 22                                                                   |
| GO | protein modification process | 6  | 145  | 0.989 | 4734   | neural precursor cell expressed, developmentally down-regulated 4                  |
| GO | protein modification process | 6  | 145  | 0.989 | 5110   | protein-L-isoaspartate (D-aspartate) O-methyltransferase                           |
| GO | protein modification process | 6  | 145  | 0.989 | 51191  | hect domain and RLD 5                                                              |
| GO | response to protein stimulus | 1  | 42   | 0.989 | 10096  | ARP3 actin-related protein 3 homolog (yeast)                                       |
| GO | intracellular                | 80 | 1794 | 0.989 | 10123  | ADP-ribosylation factor-like 4C                                                    |
| GO | intracellular                | 80 | 1794 | 0.989 | 10395  | deleted in liver cancer 1                                                          |
| GO | intracellular                | 80 | 1794 | 0.989 | 10474  | transcriptional adaptor 3                                                          |
| GO | intracellular                | 80 | 1794 | 0.989 | 10612  | tripartite motif-containing 3                                                      |
| GO | intracellular                | 80 | 1794 | 0.989 | 10788  | IQ motif containing GTPase activating protein 2                                    |
| GO | intracellular                | 80 | 1794 | 0.989 | 11164  | nudix (nucleoside diphosphate linked moiety X)-type motif 5                        |
| GO | intracellular                | 80 | 1794 | 0.989 | 11222  | mitochondrial ribosomal protein L3                                                 |
| GO | intracellular                | 80 | 1794 | 0.989 | 1123   | chimerin (chimaerin) 1                                                             |
| GO | intracellular                | 80 | 1794 | 0.989 | 11278  | Kruppel-like factor 12                                                             |
| GO | intracellular                | 80 | 1794 | 0.989 | 114088 | tripartite motif-containing 9                                                      |
| GO | intracellular                | 80 | 1794 | 0.989 | 12     | serpin peptidase inhibitor, clade A (alpha-1 antiproteinase, antitrypsin), me      |
| GO | intracellular                | 80 | 1794 | 0.989 | 121268 | Ras homolog enriched in brain like 1                                               |
| GO | intracellular                | 80 | 1794 | 0.989 | 132625 | zinc finger protein 42 homolog (mouse)                                             |
| GO | intracellular                | 80 | 1794 | 0.989 | 148213 | zinc finger protein 681                                                            |
| GO | intracellular                | 80 | 1794 | 0.989 | 153478 | pleckstrin homology domain containing, family G (with RhoGef domain) me            |
| GO | intracellular                | 80 | 1794 | 0.989 | 195828 | zinc finger protein 367                                                            |
| GO | intracellular                | 80 | 1794 | 0.989 | 22891  | zinc finger protein 365                                                            |
| GO | intracellular                | 80 | 1794 | 0.989 | 22934  | ribose 5-phosphate isomerase A                                                     |
| GO | intracellular                | 80 | 1794 | 0.989 | 25780  | RAS guanyl releasing protein 3 (calcium and DAG-regulated)                         |
| GO | intracellular                | 80 | 1794 | 0.989 | 26207  | phosphatidylinositol transfer protein, cytoplasmic 1                               |
| GO | intracellular                | 80 | 1794 | 0.989 | 26230  | T-cell lymphoma invasion and metastasis 2                                          |

|    |               |    |      |       |                                                                        |
|----|---------------|----|------|-------|------------------------------------------------------------------------|
| GO | intracellular | 80 | 1794 | 0.989 | 27289 Rho family GTPase 1                                              |
| GO | intracellular | 80 | 1794 | 0.989 | 2736 GLI family zinc finger 2                                          |
| GO | intracellular | 80 | 1794 | 0.989 | 284443 zinc finger protein 493                                         |
| GO | intracellular | 80 | 1794 | 0.989 | 28998 mitochondrial ribosomal protein L13                              |
| GO | intracellular | 80 | 1794 | 0.989 | 332 baculoviral IAP repeat-containing 5                                |
| GO | intracellular | 80 | 1794 | 0.989 | 3557 interleukin 1 receptor antagonist                                 |
| GO | intracellular | 80 | 1794 | 0.989 | 3975 LIM homeobox 1                                                    |
| GO | intracellular | 80 | 1794 | 0.989 | 4734 neural precursor cell expressed, developmentally down-regulated 4 |
| GO | intracellular | 80 | 1794 | 0.989 | 4763 neurofibromin 1                                                   |
| GO | intracellular | 80 | 1794 | 0.989 | 4893 neuroblastoma RAS viral (v-ras) oncogene homolog                  |
| GO | intracellular | 80 | 1794 | 0.989 | 51023 mitochondrial ribosomal protein S18C                             |
| GO | intracellular | 80 | 1794 | 0.989 | 51121 ribosomal protein L26-like 1                                     |
| GO | intracellular | 80 | 1794 | 0.989 | 51191 hect domain and RLD 5                                            |
| GO | intracellular | 80 | 1794 | 0.989 | 51256 TBC1 domain family, member 7                                     |
| GO | intracellular | 80 | 1794 | 0.989 | 54796 basонуclin 2                                                     |
| GO | intracellular | 80 | 1794 | 0.989 | 54984 PIN2-interacting protein 1                                       |
| GO | intracellular | 80 | 1794 | 0.989 | 54993 zinc finger and SCAN domain containing 2                         |
| GO | intracellular | 80 | 1794 | 0.989 | 55207 ADP-ribosylation factor-like 8B                                  |
| GO | intracellular | 80 | 1794 | 0.989 | 55521 tripartite motif-containing 36                                   |
| GO | intracellular | 80 | 1794 | 0.989 | 55789 DEP domain containing 1B                                         |
| GO | intracellular | 80 | 1794 | 0.989 | 5588 protein kinase C, theta                                           |
| GO | intracellular | 80 | 1794 | 0.989 | 55916 nuclear transport factor 2-like export factor 2                  |
| GO | intracellular | 80 | 1794 | 0.989 | 56655 polymerase (DNA-directed), epsilon 4 (p12 subunit)               |
| GO | intracellular | 80 | 1794 | 0.989 | 57099 apoptosis, caspase activation inhibitor                          |
| GO | intracellular | 80 | 1794 | 0.989 | 57103 chromosome 12 open reading frame 5                               |
| GO | intracellular | 80 | 1794 | 0.989 | 58499 zinc finger protein 462                                          |
| GO | intracellular | 80 | 1794 | 0.989 | 5924 Ras protein-specific guanine nucleotide-releasing factor 2        |
| GO | intracellular | 80 | 1794 | 0.989 | 59336 PR domain containing 13                                          |
| GO | intracellular | 80 | 1794 | 0.989 | 6133 ribosomal protein L9                                              |
| GO | intracellular | 80 | 1794 | 0.989 | 6154 ribosomal protein L26                                             |
| GO | intracellular | 80 | 1794 | 0.989 | 619279 zinc finger protein 704                                         |
| GO | intracellular | 80 | 1794 | 0.989 | 6242 rhotekin                                                          |
| GO | intracellular | 80 | 1794 | 0.989 | 6299 sal-like 1 (Drosophila)                                           |
| GO | intracellular | 80 | 1794 | 0.989 | 641 Bloom syndrome, RecQ helicase-like                                 |
| GO | intracellular | 80 | 1794 | 0.989 | 64393 zinc finger, matrin type 3                                       |
| GO | intracellular | 80 | 1794 | 0.989 | 64782 apoptosis enhancing nuclease                                     |



|    |                                        |    |      |       |                                                                        |
|----|----------------------------------------|----|------|-------|------------------------------------------------------------------------|
| GO | intracellular                          | 80 | 1794 | 0.989 | 65008 mitochondrial ribosomal protein L1                               |
| GO | intracellular                          | 80 | 1794 | 0.989 | 6591 snail homolog 2 (Drosophila)                                      |
| GO | intracellular                          | 80 | 1794 | 0.989 | 6615 snail homolog 1 (Drosophila)                                      |
| GO | intracellular                          | 80 | 1794 | 0.989 | 672 breast cancer 1, early onset                                       |
| GO | intracellular                          | 80 | 1794 | 0.989 | 7347 ubiquitin carboxyl-terminal esterase L3 (ubiquitin thiolesterase) |
| GO | intracellular                          | 80 | 1794 | 0.989 | 7490 Wilms tumor 1                                                     |
| GO | intracellular                          | 80 | 1794 | 0.989 | 7552 zinc finger protein 711                                           |
| GO | intracellular                          | 80 | 1794 | 0.989 | 7711 zinc finger protein 155                                           |
| GO | intracellular                          | 80 | 1794 | 0.989 | 79187 fibronectin type III and SPRY domain containing 1                |
| GO | intracellular                          | 80 | 1794 | 0.989 | 79677 structural maintenance of chromosomes 6                          |
| GO | intracellular                          | 80 | 1794 | 0.989 | 79698 zinc finger, matrin type 4                                       |
| GO | intracellular                          | 80 | 1794 | 0.989 | 81786 tripartite motif-containing 7                                    |
| GO | intracellular                          | 80 | 1794 | 0.989 | 84083 zinc finger, RAN-binding domain containing 3                     |
| GO | intracellular                          | 80 | 1794 | 0.989 | 84622 zinc finger protein 594                                          |
| GO | intracellular                          | 80 | 1794 | 0.989 | 84878 zinc finger and BTB domain containing 45                         |
| GO | intracellular                          | 80 | 1794 | 0.989 | 8997 kalirin, RhoGEF kinase                                            |
| GO | intracellular                          | 80 | 1794 | 0.989 | 91584 plexin A4                                                        |
| GO | intracellular                          | 80 | 1794 | 0.989 | 91975 zinc finger protein 300                                          |
| GO | intracellular                          | 80 | 1794 | 0.989 | 93474 zinc finger protein 670                                          |
| GO | intracellular                          | 80 | 1794 | 0.989 | 9535 glia maturation factor, gamma                                     |
| GO | intracellular                          | 80 | 1794 | 0.989 | 9839 zinc finger E-box binding homeobox 2                              |
| GO | intracellular                          | 80 | 1794 | 0.989 | 9882 TBC1 domain family, member 4                                      |
| GO | intracellular                          | 80 | 1794 | 0.989 | 9910 RAB GTPase activating protein 1-like                              |
| GO | small GTPase mediated signal transduct | 8  | 193  | 0.989 | 10123 ADP-ribosylation factor-like 4C                                  |
| GO | small GTPase mediated signal transduct | 8  | 193  | 0.989 | 10890 RAB10, member RAS oncogene family                                |
| GO | small GTPase mediated signal transduct | 8  | 193  | 0.989 | 121268 Ras homolog enriched in brain like 1                            |
| GO | small GTPase mediated signal transduct | 8  | 193  | 0.989 | 25780 RAS guanyl releasing protein 3 (calcium and DAG-regulated)       |
| GO | small GTPase mediated signal transduct | 8  | 193  | 0.989 | 27289 Rho family GTPase 1                                              |
| GO | small GTPase mediated signal transduct | 8  | 193  | 0.989 | 4893 neuroblastoma RAS viral (v-ras) oncogene homolog                  |
| GO | small GTPase mediated signal transduct | 8  | 193  | 0.989 | 55207 ADP-ribosylation factor-like 8B                                  |
| GO | small GTPase mediated signal transduct | 8  | 193  | 0.989 | 83871 RAB34, member RAS oncogene family                                |
| GO | biological_process                     | 17 | 547  | 0.989 | 10190 thioredoxin domain containing 9                                  |
| GO | biological_process                     | 17 | 547  | 0.989 | 10777 cyclic AMP-regulated phosphoprotein, 21 kD                       |
| GO | biological_process                     | 17 | 547  | 0.989 | 11259 filamin A interacting protein 1-like                             |
| GO | biological_process                     | 17 | 547  | 0.989 | 23136 erythrocyte membrane protein band 4.1-like 3                     |
| GO | biological_process                     | 17 | 547  | 0.989 | 23768 fibronectin leucine rich transmembrane protein 2                 |

|    |                                            |    |     |       |        |                                                                            |
|----|--------------------------------------------|----|-----|-------|--------|----------------------------------------------------------------------------|
| GO | biological_process                         | 17 | 547 | 0.989 | 29893  | PSMC3 interacting protein                                                  |
| GO | biological_process                         | 17 | 547 | 0.989 | 344191 | even-skipped homeobox 2                                                    |
| GO | biological_process                         | 17 | 547 | 0.989 | 4052   | latent transforming growth factor beta binding protein 1                   |
| GO | biological_process                         | 17 | 547 | 0.989 | 51050  | peptidase inhibitor 15                                                     |
| GO | biological_process                         | 17 | 547 | 0.989 | 54726  | OTU domain containing 4                                                    |
| GO | biological_process                         | 17 | 547 | 0.989 | 54733  | solute carrier family 35, member F2                                        |
| GO | biological_process                         | 17 | 547 | 0.989 | 56651  | chromosome 18 open reading frame 2                                         |
| GO | biological_process                         | 17 | 547 | 0.989 | 57590  | WD repeat and FYVE domain containing 1                                     |
| GO | biological_process                         | 17 | 547 | 0.989 | 64208  | popeye domain containing 3                                                 |
| GO | biological_process                         | 17 | 547 | 0.989 | 66000  | transmembrane protein 108                                                  |
| GO | biological_process                         | 17 | 547 | 0.989 | 7840   | Alstrom syndrome 1                                                         |
| GO | biological_process                         | 17 | 547 | 0.989 | 84668  | family with sequence similarity 126, member A                              |
| GO | RNA splicing, via transesterification reac | 1  | 25  | 0.989 | 10199  | M-phase phosphoprotein 10 (U3 small nucleolar ribonucleoprotein)           |
| GO | binding                                    | 16 | 500 | 0.989 | 10202  | dehydrogenase/reductase (SDR family) member 2                              |
| GO | binding                                    | 16 | 500 | 0.989 | 11077  | heat shock transcription factor 2 binding protein                          |
| GO | binding                                    | 16 | 500 | 0.989 | 122786 | FERM domain containing 6                                                   |
| GO | binding                                    | 16 | 500 | 0.989 | 145864 | hyaluronan and proteoglycan link protein 3                                 |
| GO | binding                                    | 16 | 500 | 0.989 | 22979  | EFR3 homolog B ( <i>S. cerevisiae</i> )                                    |
| GO | binding                                    | 16 | 500 | 0.989 | 23171  | glycerol-3-phosphate dehydrogenase 1-like                                  |
| GO | binding                                    | 16 | 500 | 0.989 | 26032  | sushi domain containing 5                                                  |
| GO | binding                                    | 16 | 500 | 0.989 | 26115  | tetratricopeptide repeat, ankyrin repeat and coiled-coil containing 2      |
| GO | binding                                    | 16 | 500 | 0.989 | 283208 | prolyl 4-hydroxylase, alpha polypeptide III                                |
| GO | binding                                    | 16 | 500 | 0.989 | 3248   | hydroxyprostaglandin dehydrogenase 15-(NAD)                                |
| GO | binding                                    | 16 | 500 | 0.989 | 3694   | integrin, beta 6                                                           |
| GO | binding                                    | 16 | 500 | 0.989 | 4052   | latent transforming growth factor beta binding protein 1                   |
| GO | binding                                    | 16 | 500 | 0.989 | 414149 | acyl-Coenzyme A binding domain containing 7                                |
| GO | binding                                    | 16 | 500 | 0.989 | 60386  | solute carrier family 25 (mitochondrial thiamine pyrophosphate carrier), m |
| GO | binding                                    | 16 | 500 | 0.989 | 81035  | collectin sub-family member 12                                             |
| GO | binding                                    | 16 | 500 | 0.989 | 9540   | tumor protein p53 inducible protein 3                                      |
| GO | nuclear envelope                           | 4  | 92  | 0.989 | 10202  | dehydrogenase/reductase (SDR family) member 2                              |
| GO | nuclear envelope                           | 4  | 92  | 0.989 | 241    | arachidonate 5-lipoxygenase-activating protein                             |
| GO | nuclear envelope                           | 4  | 92  | 0.989 | 4928   | nucleoporin 98kDa                                                          |
| GO | nuclear envelope                           | 4  | 92  | 0.989 | 9688   | nucleoporin 93kDa                                                          |
| GO | oxidation reduction                        | 18 | 515 | 0.989 | 10202  | dehydrogenase/reductase (SDR family) member 2                              |
| GO | oxidation reduction                        | 18 | 515 | 0.989 | 1543   | cytochrome P450, family 1, subfamily A, polypeptide 1                      |
| GO | oxidation reduction                        | 18 | 515 | 0.989 | 1733   | deiodinase, iodothyronine, type I                                          |

|    |                         |    |     |       |        |                                                                                  |
|----|-------------------------|----|-----|-------|--------|----------------------------------------------------------------------------------|
| GO | oxidation reduction     | 18 | 515 | 0.989 | 220    | aldehyde dehydrogenase 1 family, member A3                                       |
| GO | oxidation reduction     | 18 | 515 | 0.989 | 2232   | ferredoxin reductase                                                             |
| GO | oxidation reduction     | 18 | 515 | 0.989 | 23171  | glycerol-3-phosphate dehydrogenase 1-like                                        |
| GO | oxidation reduction     | 18 | 515 | 0.989 | 283208 | prolyl 4-hydroxylase, alpha polypeptide III                                      |
| GO | oxidation reduction     | 18 | 515 | 0.989 | 2878   | glutathione peroxidase 3 (plasma)                                                |
| GO | oxidation reduction     | 18 | 515 | 0.989 | 3028   | hydroxysteroid (17-beta) dehydrogenase 10                                        |
| GO | oxidation reduction     | 18 | 515 | 0.989 | 3248   | hydroxyprostaglandin dehydrogenase 15-(NAD)                                      |
| GO | oxidation reduction     | 18 | 515 | 0.989 | 339761 | cytochrome P450, family 27, subfamily C, polypeptide 1                           |
| GO | oxidation reduction     | 18 | 515 | 0.989 | 5264   | phytanoyl-CoA 2-hydroxylase                                                      |
| GO | oxidation reduction     | 18 | 515 | 0.989 | 57168  | aspartate beta-hydroxylase domain containing 2                                   |
| GO | oxidation reduction     | 18 | 515 | 0.989 | 6241   | ribonucleotide reductase M2                                                      |
| GO | oxidation reduction     | 18 | 515 | 0.989 | 8659   | aldehyde dehydrogenase 4 family, member A1                                       |
| GO | oxidation reduction     | 18 | 515 | 0.989 | 91801  | alkB, alkylation repair homolog 8 (E. coli)                                      |
| GO | oxidation reduction     | 18 | 515 | 0.989 | 9420   | cytochrome P450, family 7, subfamily B, polypeptide 1                            |
| GO | oxidation reduction     | 18 | 515 | 0.989 | 9540   | tumor protein p53 inducible protein 3                                            |
| GO | oxidoreductase activity | 12 | 418 | 0.989 | 10202  | dehydrogenase/reductase (SDR family) member 2                                    |
| GO | oxidoreductase activity | 12 | 418 | 0.989 | 1543   | cytochrome P450, family 1, subfamily A, polypeptide 1                            |
| GO | oxidoreductase activity | 12 | 418 | 0.989 | 220    | aldehyde dehydrogenase 1 family, member A3                                       |
| GO | oxidoreductase activity | 12 | 418 | 0.989 | 2232   | ferredoxin reductase                                                             |
| GO | oxidoreductase activity | 12 | 418 | 0.989 | 2878   | glutathione peroxidase 3 (plasma)                                                |
| GO | oxidoreductase activity | 12 | 418 | 0.989 | 3028   | hydroxysteroid (17-beta) dehydrogenase 10                                        |
| GO | oxidoreductase activity | 12 | 418 | 0.989 | 3248   | hydroxyprostaglandin dehydrogenase 15-(NAD)                                      |
| GO | oxidoreductase activity | 12 | 418 | 0.989 | 57168  | aspartate beta-hydroxylase domain containing 2                                   |
| GO | oxidoreductase activity | 12 | 418 | 0.989 | 6241   | ribonucleotide reductase M2                                                      |
| GO | oxidoreductase activity | 12 | 418 | 0.989 | 8659   | aldehyde dehydrogenase 4 family, member A1                                       |
| GO | oxidoreductase activity | 12 | 418 | 0.989 | 91801  | alkB, alkylation repair homolog 8 (E. coli)                                      |
| GO | oxidoreductase activity | 12 | 418 | 0.989 | 9540   | tumor protein p53 inducible protein 3                                            |
| GO | hydrolase activity      | 39 | 917 | 0.989 | 10212  | DEAD (Asp-Glu-Ala-Asp) box polypeptide 39                                        |
| GO | hydrolase activity      | 39 | 917 | 0.989 | 10799  | ribonuclease P/MRP 40kDa subunit                                                 |
| GO | hydrolase activity      | 39 | 917 | 0.989 | 11056  | DEAD (Asp-Glu-Ala-Asp) box polypeptide 52                                        |
| GO | hydrolase activity      | 39 | 917 | 0.989 | 11164  | nudix (nucleoside diphosphate linked moiety X)-type motif 5                      |
| GO | hydrolase activity      | 39 | 917 | 0.989 | 128853 | dual specificity phosphatase 15                                                  |
| GO | hydrolase activity      | 39 | 917 | 0.989 | 134637 | adenosine deaminase, tRNA-specific 2, TAD2 homolog (S. cerevisiae)               |
| GO | hydrolase activity      | 39 | 917 | 0.989 | 135114 | histidine triad nucleotide binding protein 3                                     |
| GO | hydrolase activity      | 39 | 917 | 0.989 | 147699 | protein phosphatase, Mg <sup>2+</sup> /Mn <sup>2+</sup> dependent, 1N (putative) |
| GO | hydrolase activity      | 39 | 917 | 0.989 | 1763   | DNA replication helicase 2 homolog (yeast)                                       |

|    |                      |    |     |       |        |                                                                           |
|----|----------------------|----|-----|-------|--------|---------------------------------------------------------------------------|
| GO | hydrolase activity   | 39 | 917 | 0.989 | 1775   | deoxyribonuclease I-like 2                                                |
| GO | hydrolase activity   | 39 | 917 | 0.989 | 2139   | eyes absent homolog 2 (Drosophila)                                        |
| GO | hydrolase activity   | 39 | 917 | 0.989 | 2237   | flap structure-specific endonuclease 1                                    |
| GO | hydrolase activity   | 39 | 917 | 0.989 | 25953  | paroxysmal nonkinesigenic dyskinesia                                      |
| GO | hydrolase activity   | 39 | 917 | 0.989 | 26275  | 3-hydroxyisobutyryl-Coenzyme A hydrolase                                  |
| GO | hydrolase activity   | 39 | 917 | 0.989 | 411    | arylsulfatase B                                                           |
| GO | hydrolase activity   | 39 | 917 | 0.989 | 479    | ATPase, H+/K+ transporting, nongastric, alpha polypeptide                 |
| GO | hydrolase activity   | 39 | 917 | 0.989 | 50485  | SWI/SNF related, matrix associated, actin dependent regulator of chromati |
| GO | hydrolase activity   | 39 | 917 | 0.989 | 50940  | phosphodiesterase 11A                                                     |
| GO | hydrolase activity   | 39 | 917 | 0.989 | 51062  | atlastin GTPase 1                                                         |
| GO | hydrolase activity   | 39 | 917 | 0.989 | 5140   | phosphodiesterase 3B, cGMP-inhibited                                      |
| GO | hydrolase activity   | 39 | 917 | 0.989 | 5145   | phosphodiesterase 6A, cGMP-specific, rod, alpha                           |
| GO | hydrolase activity   | 39 | 917 | 0.989 | 53981  | cleavage and polyadenylation specific factor 2, 100kDa                    |
| GO | hydrolase activity   | 39 | 917 | 0.989 | 5494   | protein phosphatase, Mg2+/Mn2+ dependent, 1A                              |
| GO | hydrolase activity   | 39 | 917 | 0.989 | 5702   | proteasome (prosome, macropain) 26S subunit, ATPase, 3                    |
| GO | hydrolase activity   | 39 | 917 | 0.989 | 57103  | chromosome 12 open reading frame 5                                        |
| GO | hydrolase activity   | 39 | 917 | 0.989 | 5795   | protein tyrosine phosphatase, receptor type, J                            |
| GO | hydrolase activity   | 39 | 917 | 0.989 | 590    | butyrylcholinesterase                                                     |
| GO | hydrolase activity   | 39 | 917 | 0.989 | 5965   | RecQ protein-like (DNA helicase Q1-like)                                  |
| GO | hydrolase activity   | 39 | 917 | 0.989 | 641    | Bloom syndrome, RecQ helicase-like                                        |
| GO | hydrolase activity   | 39 | 917 | 0.989 | 64782  | apoptosis enhancing nuclease                                              |
| GO | hydrolase activity   | 39 | 917 | 0.989 | 64943  | 5'-nucleotidase domain containing 2                                       |
| GO | hydrolase activity   | 39 | 917 | 0.989 | 6683   | spastin                                                                   |
| GO | hydrolase activity   | 39 | 917 | 0.989 | 669    | 2,3-bisphosphoglycerate mutase                                            |
| GO | hydrolase activity   | 39 | 917 | 0.989 | 79814  | agmatine ureohydrolase (agmatinase)                                       |
| GO | hydrolase activity   | 39 | 917 | 0.989 | 84083  | zinc finger, RAN-binding domain containing 3                              |
| GO | hydrolase activity   | 39 | 917 | 0.989 | 8458   | transcription termination factor, RNA polymerase II                       |
| GO | hydrolase activity   | 39 | 917 | 0.989 | 89797  | neuron navigator 2                                                        |
| GO | hydrolase activity   | 39 | 917 | 0.989 | 953    | ectonucleoside triphosphate diphosphohydrolase 1                          |
| GO | hydrolase activity   | 39 | 917 | 0.989 | 97     | acylphosphatase 1, erythrocyte (common) type                              |
| GO | nucleic acid binding | 9  | 254 | 0.989 | 10212  | DEAD (Asp-Glu-Ala-Asp) box polypeptide 39                                 |
| GO | nucleic acid binding | 9  | 254 | 0.989 | 10777  | cyclic AMP-regulated phosphoprotein, 21 kD                                |
| GO | nucleic acid binding | 9  | 254 | 0.989 | 348093 | RNA binding protein with multiple splicing 2                              |
| GO | nucleic acid binding | 9  | 254 | 0.989 | 54984  | PIN2-interacting protein 1                                                |
| GO | nucleic acid binding | 9  | 254 | 0.989 | 55854  | zinc finger CCCH-type containing 15                                       |
| GO | nucleic acid binding | 9  | 254 | 0.989 | 64782  | apoptosis enhancing nuclease                                              |

|    |                      |     |      |       |        |                                                                             |
|----|----------------------|-----|------|-------|--------|-----------------------------------------------------------------------------|
| GO | nucleic acid binding | 9   | 254  | 0.989 | 79736  | chromosome 17 open reading frame 42                                         |
| GO | nucleic acid binding | 9   | 254  | 0.989 | 84319  | chromosome 3 open reading frame 26                                          |
| GO | nucleic acid binding | 9   | 254  | 0.989 | 93649  | myocardin                                                                   |
| GO | metal ion binding    | 116 | 2658 | 0.989 | 10213  | proteasome (prosome, macropain) 26S subunit, non-ATPase, 14                 |
| GO | metal ion binding    | 116 | 2658 | 0.989 | 1026   | cyclin-dependent kinase inhibitor 1A (p21, Cip1)                            |
| GO | metal ion binding    | 116 | 2658 | 0.989 | 10293  | TRAF interacting protein                                                    |
| GO | metal ion binding    | 116 | 2658 | 0.989 | 10539  | glutaredoxin 3                                                              |
| GO | metal ion binding    | 116 | 2658 | 0.989 | 10612  | tripartite motif-containing 3                                               |
| GO | metal ion binding    | 116 | 2658 | 0.989 | 1123   | chimerin (chimaerin) 1                                                      |
| GO | metal ion binding    | 116 | 2658 | 0.989 | 11278  | Kruppel-like factor 12                                                      |
| GO | metal ion binding    | 116 | 2658 | 0.989 | 114088 | tripartite motif-containing 9                                               |
| GO | metal ion binding    | 116 | 2658 | 0.989 | 114757 | cytoglobin                                                                  |
| GO | metal ion binding    | 116 | 2658 | 0.989 | 114804 | ring finger protein 157                                                     |
| GO | metal ion binding    | 116 | 2658 | 0.989 | 126374 | Wilms tumor 1 interacting protein                                           |
| GO | metal ion binding    | 116 | 2658 | 0.989 | 130507 | ubiquitin protein ligase E3 component n-recognin 3 (putative)               |
| GO | metal ion binding    | 116 | 2658 | 0.989 | 132625 | zinc finger protein 42 homolog (mouse)                                      |
| GO | metal ion binding    | 116 | 2658 | 0.989 | 134637 | adenosine deaminase, tRNA-specific 2, TAD2 homolog ( <i>S. cerevisiae</i> ) |
| GO | metal ion binding    | 116 | 2658 | 0.989 | 148213 | zinc finger protein 681                                                     |
| GO | metal ion binding    | 116 | 2658 | 0.989 | 1543   | cytochrome P450, family 1, subfamily A, polypeptide 1                       |
| GO | metal ion binding    | 116 | 2658 | 0.989 | 157570 | establishment of cohesion 1 homolog 2 ( <i>S. cerevisiae</i> )              |
| GO | metal ion binding    | 116 | 2658 | 0.989 | 166336 | prickle homolog 2 ( <i>Drosophila</i> )                                     |
| GO | metal ion binding    | 116 | 2658 | 0.989 | 1788   | DNA (cytosine-5-)-methyltransferase 3 alpha                                 |
| GO | metal ion binding    | 116 | 2658 | 0.989 | 195828 | zinc finger protein 367                                                     |
| GO | metal ion binding    | 116 | 2658 | 0.989 | 2135   | exostoses (multiple)-like 2                                                 |
| GO | metal ion binding    | 116 | 2658 | 0.989 | 221687 | ring finger protein 182                                                     |
| GO | metal ion binding    | 116 | 2658 | 0.989 | 2273   | four and a half LIM domains 1                                               |
| GO | metal ion binding    | 116 | 2658 | 0.989 | 23590  | prenyl (decaprenyl) diphosphate synthase, subunit 1                         |
| GO | metal ion binding    | 116 | 2658 | 0.989 | 2534   | FYN oncogene related to SRC, FGR, YES                                       |
| GO | metal ion binding    | 116 | 2658 | 0.989 | 25885  | polymerase (RNA) I polypeptide A, 194kDa                                    |
| GO | metal ion binding    | 116 | 2658 | 0.989 | 25953  | paroxysmal nonkinesigenic dyskinesia                                        |
| GO | metal ion binding    | 116 | 2658 | 0.989 | 2618   | phosphoribosylglycinamide formyltransferase, phosphoribosylglycinamide      |
| GO | metal ion binding    | 116 | 2658 | 0.989 | 26519  | translocase of inner mitochondrial membrane 10 homolog (yeast)              |
| GO | metal ion binding    | 116 | 2658 | 0.989 | 26521  | translocase of inner mitochondrial membrane 8 homolog B (yeast)             |
| GO | metal ion binding    | 116 | 2658 | 0.989 | 2736   | GLI family zinc finger 2                                                    |
| GO | metal ion binding    | 116 | 2658 | 0.989 | 283208 | prolyl 4-hydroxylase, alpha polypeptide III                                 |
| GO | metal ion binding    | 116 | 2658 | 0.989 | 283455 | kinase suppressor of ras 2                                                  |

|    |                   |     |      |       |        |                                                                                        |
|----|-------------------|-----|------|-------|--------|----------------------------------------------------------------------------------------|
| GO | metal ion binding | 116 | 2658 | 0.989 | 284443 | zinc finger protein 493                                                                |
| GO | metal ion binding | 116 | 2658 | 0.989 | 286151 | F-box protein 43                                                                       |
| GO | metal ion binding | 116 | 2658 | 0.989 | 2863   | G protein-coupled receptor 39                                                          |
| GO | metal ion binding | 116 | 2658 | 0.989 | 29128  | ubiquitin-like with PHD and ring finger domains 1                                      |
| GO | metal ion binding | 116 | 2658 | 0.989 | 29922  | non-metastatic cells 7, protein expressed in (nucleoside-diphosphate kinase)           |
| GO | metal ion binding | 116 | 2658 | 0.989 | 29995  | LIM and cysteine-rich domains 1                                                        |
| GO | metal ion binding | 116 | 2658 | 0.989 | 332    | baculoviral IAP repeat-containing 5                                                    |
| GO | metal ion binding | 116 | 2658 | 0.989 | 339761 | cytochrome P450, family 27, subfamily C, polypeptide 1                                 |
| GO | metal ion binding | 116 | 2658 | 0.989 | 3751   | potassium voltage-gated channel, Shal-related subfamily, member 2                      |
| GO | metal ion binding | 116 | 2658 | 0.989 | 377677 | carbonic anhydrase XIII                                                                |
| GO | metal ion binding | 116 | 2658 | 0.989 | 3778   | potassium large conductance calcium-activated channel, subfamily M, alpha              |
| GO | metal ion binding | 116 | 2658 | 0.989 | 389421 | lin-28 homolog B (C. elegans)                                                          |
| GO | metal ion binding | 116 | 2658 | 0.989 | 3975   | LIM homeobox 1                                                                         |
| GO | metal ion binding | 116 | 2658 | 0.989 | 411    | arylsulfatase B                                                                        |
| GO | metal ion binding | 116 | 2658 | 0.989 | 4171   | minichromosome maintenance complex component 2                                         |
| GO | metal ion binding | 116 | 2658 | 0.989 | 431707 | LIM homeobox 8                                                                         |
| GO | metal ion binding | 116 | 2658 | 0.989 | 4318   | matrix metalloproteinase 9 (gelatinase B, 92kDa gelatinase, 92kDa type IV collagenase) |
| GO | metal ion binding | 116 | 2658 | 0.989 | 479    | ATPase, H+/K+ transporting, nongastric, alpha polypeptide                              |
| GO | metal ion binding | 116 | 2658 | 0.989 | 4884   | neuronal pentraxin I                                                                   |
| GO | metal ion binding | 116 | 2658 | 0.989 | 50940  | phosphodiesterase 11A                                                                  |
| GO | metal ion binding | 116 | 2658 | 0.989 | 51136  | ring finger protein, transmembrane 1                                                   |
| GO | metal ion binding | 116 | 2658 | 0.989 | 51218  | glutaredoxin 5                                                                         |
| GO | metal ion binding | 116 | 2658 | 0.989 | 5140   | phosphodiesterase 3B, cGMP-inhibited                                                   |
| GO | metal ion binding | 116 | 2658 | 0.989 | 5145   | phosphodiesterase 6A, cGMP-specific, rod, alpha                                        |
| GO | metal ion binding | 116 | 2658 | 0.989 | 5184   | peptidase D                                                                            |
| GO | metal ion binding | 116 | 2658 | 0.989 | 5264   | phytanoyl-CoA 2-hydroxylase                                                            |
| GO | metal ion binding | 116 | 2658 | 0.989 | 5440   | polymerase (RNA) II (DNA directed) polypeptide K, 7.0kDa                               |
| GO | metal ion binding | 116 | 2658 | 0.989 | 54796  | basonuclin 2                                                                           |
| GO | metal ion binding | 116 | 2658 | 0.989 | 54822  | transient receptor potential cation channel, subfamily M, member 7                     |
| GO | metal ion binding | 116 | 2658 | 0.989 | 54849  | differentially expressed in FDCP 8 homolog (mouse)                                     |
| GO | metal ion binding | 116 | 2658 | 0.989 | 54993  | zinc finger and SCAN domain containing 2                                               |
| GO | metal ion binding | 116 | 2658 | 0.989 | 55016  | membrane-associated ring finger (C3HC4) 1                                              |
| GO | metal ion binding | 116 | 2658 | 0.989 | 55084  | sine oculis binding protein homolog (Drosophila)                                       |
| GO | metal ion binding | 116 | 2658 | 0.989 | 55521  | tripartite motif-containing 36                                                         |
| GO | metal ion binding | 116 | 2658 | 0.989 | 5558   | primase, DNA, polypeptide 2 (58kDa)                                                    |
| GO | metal ion binding | 116 | 2658 | 0.989 | 55803  | ArfGAP with dual PH domains 2                                                          |

|    |                   |     |      |       |        |                                                                        |
|----|-------------------|-----|------|-------|--------|------------------------------------------------------------------------|
| GO | metal ion binding | 116 | 2658 | 0.989 | 55854  | zinc finger CCCH-type containing 15                                    |
| GO | metal ion binding | 116 | 2658 | 0.989 | 5588   | protein kinase C, theta                                                |
| GO | metal ion binding | 116 | 2658 | 0.989 | 56852  | RAD18 homolog ( <i>S. cerevisiae</i> )                                 |
| GO | metal ion binding | 116 | 2658 | 0.989 | 57484  | ring finger protein 150                                                |
| GO | metal ion binding | 116 | 2658 | 0.989 | 57574  | membrane-associated ring finger (C3HC4) 4                              |
| GO | metal ion binding | 116 | 2658 | 0.989 | 57590  | WD repeat and FYVE domain containing 1                                 |
| GO | metal ion binding | 116 | 2658 | 0.989 | 58499  | zinc finger protein 462                                                |
| GO | metal ion binding | 116 | 2658 | 0.989 | 59336  | PR domain containing 13                                                |
| GO | metal ion binding | 116 | 2658 | 0.989 | 619279 | zinc finger protein 704                                                |
| GO | metal ion binding | 116 | 2658 | 0.989 | 6299   | sal-like 1 ( <i>Drosophila</i> )                                       |
| GO | metal ion binding | 116 | 2658 | 0.989 | 64393  | zinc finger, matrin type 3                                             |
| GO | metal ion binding | 116 | 2658 | 0.989 | 64943  | 5'-nucleotidase domain containing 2                                    |
| GO | metal ion binding | 116 | 2658 | 0.989 | 659    | bone morphogenetic protein receptor, type II (serine/threonine kinase) |
| GO | metal ion binding | 116 | 2658 | 0.989 | 6591   | snail homolog 2 ( <i>Drosophila</i> )                                  |
| GO | metal ion binding | 116 | 2658 | 0.989 | 6615   | snail homolog 1 ( <i>Drosophila</i> )                                  |
| GO | metal ion binding | 116 | 2658 | 0.989 | 672    | breast cancer 1, early onset                                           |
| GO | metal ion binding | 116 | 2658 | 0.989 | 7046   | transforming growth factor, beta receptor 1                            |
| GO | metal ion binding | 116 | 2658 | 0.989 | 7078   | TIMP metalloproteinase inhibitor 3                                     |
| GO | metal ion binding | 116 | 2658 | 0.989 | 7490   | Wilms tumor 1                                                          |
| GO | metal ion binding | 116 | 2658 | 0.989 | 7552   | zinc finger protein 711                                                |
| GO | metal ion binding | 116 | 2658 | 0.989 | 767    | carbonic anhydrase VIII                                                |
| GO | metal ion binding | 116 | 2658 | 0.989 | 7711   | zinc finger protein 155                                                |
| GO | metal ion binding | 116 | 2658 | 0.989 | 79698  | zinc finger, matrin type 4                                             |
| GO | metal ion binding | 116 | 2658 | 0.989 | 79710  | MORC family CW-type zinc finger 4                                      |
| GO | metal ion binding | 116 | 2658 | 0.989 | 79814  | agmatine ureohydrolase (agmatinase)                                    |
| GO | metal ion binding | 116 | 2658 | 0.989 | 81035  | collectin sub-family member 12                                         |
| GO | metal ion binding | 116 | 2658 | 0.989 | 81786  | tripartite motif-containing 7                                          |
| GO | metal ion binding | 116 | 2658 | 0.989 | 8193   | D4, zinc and double PHD fingers family 1                               |
| GO | metal ion binding | 116 | 2658 | 0.989 | 84083  | zinc finger, RAN-binding domain containing 3                           |
| GO | metal ion binding | 116 | 2658 | 0.989 | 84101  | ubiquitin specific peptidase 44                                        |
| GO | metal ion binding | 116 | 2658 | 0.989 | 84168  | anthrax toxin receptor 1                                               |
| GO | metal ion binding | 116 | 2658 | 0.989 | 84172  | polymerase (RNA) I polypeptide B, 128kDa                               |
| GO | metal ion binding | 116 | 2658 | 0.989 | 84622  | zinc finger protein 594                                                |
| GO | metal ion binding | 116 | 2658 | 0.989 | 84878  | zinc finger and BTB domain containing 45                               |
| GO | metal ion binding | 116 | 2658 | 0.989 | 8626   | tumor protein p63                                                      |
| GO | metal ion binding | 116 | 2658 | 0.989 | 8728   | ADAM metalloproteinase domain 19 (meltrin beta)                        |

|    |                                           |     |      |       |                                                                         |
|----|-------------------------------------------|-----|------|-------|-------------------------------------------------------------------------|
| GO | metal ion binding                         | 116 | 2658 | 0.989 | 8747 ADAM metallopeptidase domain 21                                    |
| GO | metal ion binding                         | 116 | 2658 | 0.989 | 8997 kalirin, RhoGEF kinase                                             |
| GO | metal ion binding                         | 116 | 2658 | 0.989 | 91801 alkB, alkylation repair homolog 8 (E. coli)                       |
| GO | metal ion binding                         | 116 | 2658 | 0.989 | 91975 zinc finger protein 300                                           |
| GO | metal ion binding                         | 116 | 2658 | 0.989 | 92312 mex-3 homolog A (C. elegans)                                      |
| GO | metal ion binding                         | 116 | 2658 | 0.989 | 9260 PDZ and LIM domain 7 (enigma)                                      |
| GO | metal ion binding                         | 116 | 2658 | 0.989 | 93474 zinc finger protein 670                                           |
| GO | metal ion binding                         | 116 | 2658 | 0.989 | 9355 LIM homeobox 2                                                     |
| GO | metal ion binding                         | 116 | 2658 | 0.989 | 9420 cytochrome P450, family 7, subfamily B, polypeptide 1              |
| GO | metal ion binding                         | 116 | 2658 | 0.989 | 9744 ArfGAP with coiled-coil, ankyrin repeat and PH domains 1           |
| GO | metal ion binding                         | 116 | 2658 | 0.989 | 9839 zinc finger E-box binding homeobox 2                               |
| GO | metallopeptidase activity                 | 2   | 88   | 0.989 | 10213 proteasome (prosome, macropain) 26S subunit, non-ATPase, 14       |
| GO | metallopeptidase activity                 | 2   | 88   | 0.989 | 8747 ADAM metallopeptidase domain 21                                    |
| GO | early endosome membrane                   | 1   | 37   | 0.989 | 10254 signal transducing adaptor molecule (SH3 domain and ITAM motif) 2 |
| GO | endosome                                  | 6   | 215  | 0.989 | 10254 signal transducing adaptor molecule (SH3 domain and ITAM motif) 2 |
| GO | endosome                                  | 6   | 215  | 0.989 | 2534 FYN oncogene related to SRC, FGR, YES                              |
| GO | endosome                                  | 6   | 215  | 0.989 | 55207 ADP-ribosylation factor-like 8B                                   |
| GO | endosome                                  | 6   | 215  | 0.989 | 6683 spastin                                                            |
| GO | endosome                                  | 6   | 215  | 0.989 | 7037 transferrin receptor (p90, CD71)                                   |
| GO | endosome                                  | 6   | 215  | 0.989 | 83930 STARD3 N-terminal like                                            |
| GO | intracellular protein transport           | 7   | 174  | 0.989 | 10254 signal transducing adaptor molecule (SH3 domain and ITAM motif) 2 |
| GO | intracellular protein transport           | 7   | 174  | 0.989 | 1121 choroideremia (Rab escort protein 1)                               |
| GO | intracellular protein transport           | 7   | 174  | 0.989 | 2898 glutamate receptor, ionotropic, kainate 2                          |
| GO | intracellular protein transport           | 7   | 174  | 0.989 | 3836 karyopherin alpha 1 (importin alpha 5)                             |
| GO | intracellular protein transport           | 7   | 174  | 0.989 | 3838 karyopherin alpha 2 (RAG cohort 1, importin alpha 1)               |
| GO | intracellular protein transport           | 7   | 174  | 0.989 | 54843 synaptotagmin-like 2                                              |
| GO | intracellular protein transport           | 7   | 174  | 0.989 | 8905 adaptor-related protein complex 1, sigma 2 subunit                 |
| GO | positive regulation of anti-apoptosis     | 1   | 32   | 0.989 | 1026 cyclin-dependent kinase inhibitor 1A (p21, Cip1)                   |
| GO | positive regulation of B cell proliferati | 1   | 25   | 0.989 | 1026 cyclin-dependent kinase inhibitor 1A (p21, Cip1)                   |
| GO | cell proliferation                        | 12  | 286  | 0.989 | 10293 TRAF interacting protein                                          |
| GO | cell proliferation                        | 12  | 286  | 0.989 | 1164 CDC28 protein kinase regulatory subunit 2                          |
| GO | cell proliferation                        | 12  | 286  | 0.989 | 1543 cytochrome P450, family 1, subfamily A, polypeptide 1              |
| GO | cell proliferation                        | 12  | 286  | 0.989 | 1841 deoxythymidylate kinase (thymidylate kinase)                       |
| GO | cell proliferation                        | 12  | 286  | 0.989 | 2242 feline sarcoma oncogene                                            |
| GO | cell proliferation                        | 12  | 286  | 0.989 | 2736 GLI family zinc finger 2                                           |
| GO | cell proliferation                        | 12  | 286  | 0.989 | 29128 ubiquitin-like with PHD and ring finger domains 1                 |



|    |                                 |    |      |       |                                                                                    |
|----|---------------------------------|----|------|-------|------------------------------------------------------------------------------------|
| GO | cell proliferation              | 12 | 286  | 0.989 | 54331 guanine nucleotide binding protein (G protein), gamma 2                      |
| GO | cell proliferation              | 12 | 286  | 0.989 | 55759 WD repeat domain 12                                                          |
| GO | cell proliferation              | 12 | 286  | 0.989 | 586 branched chain aminotransferase 1, cytosolic                                   |
| GO | cell proliferation              | 12 | 286  | 0.989 | 60675 prokineticin 2                                                               |
| GO | cell proliferation              | 12 | 286  | 0.989 | 6695 sparco/osteonectin, cwcv and kazal-like domains proteoglycan (testican) 1     |
| GO | perinuclear region of cytoplasm | 14 | 309  | 0.989 | 10293 TRAF interacting protein                                                     |
| GO | perinuclear region of cytoplasm | 14 | 309  | 0.989 | 11226 UDP-N-acetyl-alpha-D-galactosamine:polypeptide N-acetylgalactosaminyltr      |
| GO | perinuclear region of cytoplasm | 14 | 309  | 0.989 | 25780 RAS guanyl releasing protein 3 (calcium and DAG-regulated)                   |
| GO | perinuclear region of cytoplasm | 14 | 309  | 0.989 | 26019 UPF2 regulator of nonsense transcripts homolog (yeast)                       |
| GO | perinuclear region of cytoplasm | 14 | 309  | 0.989 | 26999 cytoplasmic FMR1 interacting protein 2                                       |
| GO | perinuclear region of cytoplasm | 14 | 309  | 0.989 | 309 annexin A6                                                                     |
| GO | perinuclear region of cytoplasm | 14 | 309  | 0.989 | 4734 neural precursor cell expressed, developmentally down-regulated 4             |
| GO | perinuclear region of cytoplasm | 14 | 309  | 0.989 | 4830 non-metastatic cells 1, protein (NM23A) expressed in                          |
| GO | perinuclear region of cytoplasm | 14 | 309  | 0.989 | 51191 hect domain and RLD 5                                                        |
| GO | perinuclear region of cytoplasm | 14 | 309  | 0.989 | 51499 TP53 regulated inhibitor of apoptosis 1                                      |
| GO | perinuclear region of cytoplasm | 14 | 309  | 0.989 | 6683 spastin                                                                       |
| GO | perinuclear region of cytoplasm | 14 | 309  | 0.989 | 7037 transferrin receptor (p90, CD71)                                              |
| GO | perinuclear region of cytoplasm | 14 | 309  | 0.989 | 8997 kalirin, RhoGEF kinase                                                        |
| GO | perinuclear region of cytoplasm | 14 | 309  | 0.989 | 9053 microtubule-associated protein 7                                              |
| GO | zinc ion binding                | 81 | 1867 | 0.989 | 10293 TRAF interacting protein                                                     |
| GO | zinc ion binding                | 81 | 1867 | 0.989 | 10612 tripartite motif-containing 3                                                |
| GO | zinc ion binding                | 81 | 1867 | 0.989 | 10893 matrix metalloproteinase 24 (membrane-inserted)                              |
| GO | zinc ion binding                | 81 | 1867 | 0.989 | 11278 Kruppel-like factor 12                                                       |
| GO | zinc ion binding                | 81 | 1867 | 0.989 | 114088 tripartite motif-containing 9                                               |
| GO | zinc ion binding                | 81 | 1867 | 0.989 | 114804 ring finger protein 157                                                     |
| GO | zinc ion binding                | 81 | 1867 | 0.989 | 126374 Wilms tumor 1 interacting protein                                           |
| GO | zinc ion binding                | 81 | 1867 | 0.989 | 130507 ubiquitin protein ligase E3 component n-recognin 3 (putative)               |
| GO | zinc ion binding                | 81 | 1867 | 0.989 | 132625 zinc finger protein 42 homolog (mouse)                                      |
| GO | zinc ion binding                | 81 | 1867 | 0.989 | 134637 adenosine deaminase, tRNA-specific 2, TAD2 homolog ( <i>S. cerevisiae</i> ) |
| GO | zinc ion binding                | 81 | 1867 | 0.989 | 148213 zinc finger protein 681                                                     |
| GO | zinc ion binding                | 81 | 1867 | 0.989 | 166336 prickle homolog 2 ( <i>Drosophila</i> )                                     |
| GO | zinc ion binding                | 81 | 1867 | 0.989 | 1788 DNA (cytosine-5-)-methyltransferase 3 alpha                                   |
| GO | zinc ion binding                | 81 | 1867 | 0.989 | 195828 zinc finger protein 367                                                     |
| GO | zinc ion binding                | 81 | 1867 | 0.989 | 221687 ring finger protein 182                                                     |
| GO | zinc ion binding                | 81 | 1867 | 0.989 | 2273 four and a half LIM domains 1                                                 |
| GO | zinc ion binding                | 81 | 1867 | 0.989 | 22891 zinc finger protein 365                                                      |

|    |                  |    |      |       |        |                                                                                        |
|----|------------------|----|------|-------|--------|----------------------------------------------------------------------------------------|
| GO | zinc ion binding | 81 | 1867 | 0.989 | 25953  | paroxysmal nonkinesigenic dyskinesia                                                   |
| GO | zinc ion binding | 81 | 1867 | 0.989 | 26519  | translocase of inner mitochondrial membrane 10 homolog (yeast)                         |
| GO | zinc ion binding | 81 | 1867 | 0.989 | 26521  | translocase of inner mitochondrial membrane 8 homolog B (yeast)                        |
| GO | zinc ion binding | 81 | 1867 | 0.989 | 2736   | GLI family zinc finger 2                                                               |
| GO | zinc ion binding | 81 | 1867 | 0.989 | 27445  | piccolo (presynaptic cytomatrix protein)                                               |
| GO | zinc ion binding | 81 | 1867 | 0.989 | 284443 | zinc finger protein 493                                                                |
| GO | zinc ion binding | 81 | 1867 | 0.989 | 286151 | F-box protein 43                                                                       |
| GO | zinc ion binding | 81 | 1867 | 0.989 | 29128  | ubiquitin-like with PHD and ring finger domains 1                                      |
| GO | zinc ion binding | 81 | 1867 | 0.989 | 29995  | LIM and cysteine-rich domains 1                                                        |
| GO | zinc ion binding | 81 | 1867 | 0.989 | 332    | baculoviral IAP repeat-containing 5                                                    |
| GO | zinc ion binding | 81 | 1867 | 0.989 | 377677 | carbonic anhydrase XIII                                                                |
| GO | zinc ion binding | 81 | 1867 | 0.989 | 389421 | lin-28 homolog B (C. elegans)                                                          |
| GO | zinc ion binding | 81 | 1867 | 0.989 | 3975   | LIM homeobox 1                                                                         |
| GO | zinc ion binding | 81 | 1867 | 0.989 | 4312   | matrix metalloproteinase 1 (interstitial collagenase)                                  |
| GO | zinc ion binding | 81 | 1867 | 0.989 | 431707 | LIM homeobox 8                                                                         |
| GO | zinc ion binding | 81 | 1867 | 0.989 | 4318   | matrix metalloproteinase 9 (gelatinase B, 92kDa gelatinase, 92kDa type IV collagenase) |
| GO | zinc ion binding | 81 | 1867 | 0.989 | 4319   | matrix metalloproteinase 10 (stromelysin 2)                                            |
| GO | zinc ion binding | 81 | 1867 | 0.989 | 51136  | ring finger protein, transmembrane 1                                                   |
| GO | zinc ion binding | 81 | 1867 | 0.989 | 5440   | polymerase (RNA) II (DNA directed) polypeptide K, 7.0kDa                               |
| GO | zinc ion binding | 81 | 1867 | 0.989 | 54796  | basonuclin 2                                                                           |
| GO | zinc ion binding | 81 | 1867 | 0.989 | 54843  | synaptotagmin-like 2                                                                   |
| GO | zinc ion binding | 81 | 1867 | 0.989 | 54849  | differentially expressed in FDCP 8 homolog (mouse)                                     |
| GO | zinc ion binding | 81 | 1867 | 0.989 | 54993  | zinc finger and SCAN domain containing 2                                               |
| GO | zinc ion binding | 81 | 1867 | 0.989 | 55016  | membrane-associated ring finger (C3HC4) 1                                              |
| GO | zinc ion binding | 81 | 1867 | 0.989 | 55521  | tripartite motif-containing 36                                                         |
| GO | zinc ion binding | 81 | 1867 | 0.989 | 55803  | ArfGAP with dual PH domains 2                                                          |
| GO | zinc ion binding | 81 | 1867 | 0.989 | 55854  | zinc finger CCCH-type containing 15                                                    |
| GO | zinc ion binding | 81 | 1867 | 0.989 | 56852  | RAD18 homolog (S. cerevisiae)                                                          |
| GO | zinc ion binding | 81 | 1867 | 0.989 | 57484  | ring finger protein 150                                                                |
| GO | zinc ion binding | 81 | 1867 | 0.989 | 57574  | membrane-associated ring finger (C3HC4) 4                                              |
| GO | zinc ion binding | 81 | 1867 | 0.989 | 57590  | WD repeat and FYVE domain containing 1                                                 |
| GO | zinc ion binding | 81 | 1867 | 0.989 | 58499  | zinc finger protein 462                                                                |
| GO | zinc ion binding | 81 | 1867 | 0.989 | 59336  | PR domain containing 13                                                                |
| GO | zinc ion binding | 81 | 1867 | 0.989 | 619279 | zinc finger protein 704                                                                |
| GO | zinc ion binding | 81 | 1867 | 0.989 | 6299   | sal-like 1 (Drosophila)                                                                |
| GO | zinc ion binding | 81 | 1867 | 0.989 | 64393  | zinc finger, matrin type 3                                                             |

|    |                                        |    |      |       |                                                               |
|----|----------------------------------------|----|------|-------|---------------------------------------------------------------|
| GO | zinc ion binding                       | 81 | 1867 | 0.989 | 6591 snail homolog 2 (Drosophila)                             |
| GO | zinc ion binding                       | 81 | 1867 | 0.989 | 6615 snail homolog 1 (Drosophila)                             |
| GO | zinc ion binding                       | 81 | 1867 | 0.989 | 672 breast cancer 1, early onset                              |
| GO | zinc ion binding                       | 81 | 1867 | 0.989 | 7490 Wilms tumor 1                                            |
| GO | zinc ion binding                       | 81 | 1867 | 0.989 | 7552 zinc finger protein 711                                  |
| GO | zinc ion binding                       | 81 | 1867 | 0.989 | 767 carbonic anhydrase VIII                                   |
| GO | zinc ion binding                       | 81 | 1867 | 0.989 | 7711 zinc finger protein 155                                  |
| GO | zinc ion binding                       | 81 | 1867 | 0.989 | 79698 zinc finger, matrin type 4                              |
| GO | zinc ion binding                       | 81 | 1867 | 0.989 | 79710 MORC family CW-type zinc finger 4                       |
| GO | zinc ion binding                       | 81 | 1867 | 0.989 | 81786 tripartite motif-containing 7                           |
| GO | zinc ion binding                       | 81 | 1867 | 0.989 | 8193 D4, zinc and double PHD fingers family 1                 |
| GO | zinc ion binding                       | 81 | 1867 | 0.989 | 84083 zinc finger, RAN-binding domain containing 3            |
| GO | zinc ion binding                       | 81 | 1867 | 0.989 | 84101 ubiquitin specific peptidase 44                         |
| GO | zinc ion binding                       | 81 | 1867 | 0.989 | 84206 mex-3 homolog B (C. elegans)                            |
| GO | zinc ion binding                       | 81 | 1867 | 0.989 | 8458 transcription termination factor, RNA polymerase II      |
| GO | zinc ion binding                       | 81 | 1867 | 0.989 | 84622 zinc finger protein 594                                 |
| GO | zinc ion binding                       | 81 | 1867 | 0.989 | 84878 zinc finger and BTB domain containing 45                |
| GO | zinc ion binding                       | 81 | 1867 | 0.989 | 8626 tumor protein p63                                        |
| GO | zinc ion binding                       | 81 | 1867 | 0.989 | 8728 ADAM metallopeptidase domain 19 (meltrin beta)           |
| GO | zinc ion binding                       | 81 | 1867 | 0.989 | 8747 ADAM metallopeptidase domain 21                          |
| GO | zinc ion binding                       | 81 | 1867 | 0.989 | 91975 zinc finger protein 300                                 |
| GO | zinc ion binding                       | 81 | 1867 | 0.989 | 92312 mex-3 homolog A (C. elegans)                            |
| GO | zinc ion binding                       | 81 | 1867 | 0.989 | 9260 PDZ and LIM domain 7 (enigma)                            |
| GO | zinc ion binding                       | 81 | 1867 | 0.989 | 93474 zinc finger protein 670                                 |
| GO | zinc ion binding                       | 81 | 1867 | 0.989 | 9355 LIM homeobox 2                                           |
| GO | zinc ion binding                       | 81 | 1867 | 0.989 | 9540 tumor protein p53 inducible protein 3                    |
| GO | zinc ion binding                       | 81 | 1867 | 0.989 | 9744 ArfGAP with coiled-coil, ankyrin repeat and PH domains 1 |
| GO | zinc ion binding                       | 81 | 1867 | 0.989 | 9839 zinc finger E-box binding homeobox 2                     |
| GO | activation of phospholipase C activity | 1  | 22   | 0.989 | 10395 deleted in liver cancer 1                               |
| GO | focal adhesion                         | 3  | 86   | 0.989 | 10395 deleted in liver cancer 1                               |
| GO | focal adhesion                         | 3  | 86   | 0.989 | 30011 SH3-domain kinase binding protein 1                     |
| GO | focal adhesion                         | 3  | 86   | 0.989 | 9260 PDZ and LIM domain 7 (enigma)                            |
| GO | Rho GTPase activator activity          | 1  | 22   | 0.989 | 10395 deleted in liver cancer 1                               |
| GO | transcriptional repressor complex      | 1  | 29   | 0.989 | 1045 caudal type homeobox 2                                   |
| GO | endoplasmic reticulum membrane         | 21 | 518  | 0.989 | 1047 calmegin                                                 |
| GO | endoplasmic reticulum membrane         | 21 | 518  | 0.989 | 13 arylacetamide deacetylase (esterase)                       |

|    |                                |    |     |       |        |                                                                              |
|----|--------------------------------|----|-----|-------|--------|------------------------------------------------------------------------------|
| GO | endoplasmic reticulum membrane | 21 | 518 | 0.989 | 145173 | beta 1,3-galactosyltransferase-like                                          |
| GO | endoplasmic reticulum membrane | 21 | 518 | 0.989 | 1543   | cytochrome P450, family 1, subfamily A, polypeptide 1                        |
| GO | endoplasmic reticulum membrane | 21 | 518 | 0.989 | 1733   | deiodinase, iodothyronine, type I                                            |
| GO | endoplasmic reticulum membrane | 21 | 518 | 0.989 | 1984   | eukaryotic translation initiation factor 5A                                  |
| GO | endoplasmic reticulum membrane | 21 | 518 | 0.989 | 23305  | acyl-CoA synthetase long-chain family member 6                               |
| GO | endoplasmic reticulum membrane | 21 | 518 | 0.989 | 241    | arachidonate 5-lipoxygenase-activating protein                               |
| GO | endoplasmic reticulum membrane | 21 | 518 | 0.989 | 27429  | HtrA serine peptidase 2                                                      |
| GO | endoplasmic reticulum membrane | 21 | 518 | 0.989 | 51062  | atlastin GTPase 1                                                            |
| GO | endoplasmic reticulum membrane | 21 | 518 | 0.989 | 581    | BCL2-associated X protein                                                    |
| GO | endoplasmic reticulum membrane | 21 | 518 | 0.989 | 5924   | Ras protein-specific guanine nucleotide-releasing factor 2                   |
| GO | endoplasmic reticulum membrane | 21 | 518 | 0.989 | 64131  | xylosyltransferase I                                                         |
| GO | endoplasmic reticulum membrane | 21 | 518 | 0.989 | 6785   | elongation of very long chain fatty acids (FEN1/Elo2, SUR4/Elo3, yeast)-like |
| GO | endoplasmic reticulum membrane | 21 | 518 | 0.989 | 79071  | ELOVL family member 6, elongation of long chain fatty acids (FEN1/Elo2, SL   |
| GO | endoplasmic reticulum membrane | 21 | 518 | 0.989 | 79669  | chromosome 3 open reading frame 52                                           |
| GO | endoplasmic reticulum membrane | 21 | 518 | 0.989 | 79993  | ELOVL family member 7, elongation of long chain fatty acids (yeast)          |
| GO | endoplasmic reticulum membrane | 21 | 518 | 0.989 | 81562  | lectin, mannose-binding 2-like                                               |
| GO | endoplasmic reticulum membrane | 21 | 518 | 0.989 | 84230  | leucine rich repeat containing 8 family, member C                            |
| GO | endoplasmic reticulum membrane | 21 | 518 | 0.989 | 90701  | SEC11 homolog C (S. cerevisiae)                                              |
| GO | endoplasmic reticulum membrane | 21 | 518 | 0.989 | 9420   | cytochrome P450, family 7, subfamily B, polypeptide 1                        |
| GO | endoplasmic reticulum          | 34 | 880 | 0.989 | 1047   | calmegin                                                                     |
| GO | endoplasmic reticulum          | 34 | 880 | 0.989 | 10492  | synaptotagmin binding, cytoplasmic RNA interacting protein                   |
| GO | endoplasmic reticulum          | 34 | 880 | 0.989 | 13     | arylacetamide deacetylase (esterase)                                         |
| GO | endoplasmic reticulum          | 34 | 880 | 0.989 | 145173 | beta 1,3-galactosyltransferase-like                                          |
| GO | endoplasmic reticulum          | 34 | 880 | 0.989 | 1543   | cytochrome P450, family 1, subfamily A, polypeptide 1                        |
| GO | endoplasmic reticulum          | 34 | 880 | 0.989 | 1733   | deiodinase, iodothyronine, type I                                            |
| GO | endoplasmic reticulum          | 34 | 880 | 0.989 | 1984   | eukaryotic translation initiation factor 5A                                  |
| GO | endoplasmic reticulum          | 34 | 880 | 0.989 | 2135   | exostoses (multiple)-like 2                                                  |
| GO | endoplasmic reticulum          | 34 | 880 | 0.989 | 23305  | acyl-CoA synthetase long-chain family member 6                               |
| GO | endoplasmic reticulum          | 34 | 880 | 0.989 | 23562  | claudin 14                                                                   |
| GO | endoplasmic reticulum          | 34 | 880 | 0.989 | 241    | arachidonate 5-lipoxygenase-activating protein                               |
| GO | endoplasmic reticulum          | 34 | 880 | 0.989 | 27429  | HtrA serine peptidase 2                                                      |
| GO | endoplasmic reticulum          | 34 | 880 | 0.989 | 283208 | prolyl 4-hydroxylase, alpha polypeptide III                                  |
| GO | endoplasmic reticulum          | 34 | 880 | 0.989 | 29940  | dermatan sulfate epimerase                                                   |
| GO | endoplasmic reticulum          | 34 | 880 | 0.989 | 341    | apolipoprotein C-I                                                           |
| GO | endoplasmic reticulum          | 34 | 880 | 0.989 | 3778   | potassium large conductance calcium-activated channel, subfamily M, alph     |
| GO | endoplasmic reticulum          | 34 | 880 | 0.989 | 51062  | atlastin GTPase 1                                                            |

|    |                                    |    |     |       |       |                                                                              |
|----|------------------------------------|----|-----|-------|-------|------------------------------------------------------------------------------|
| GO | endoplasmic reticulum              | 34 | 880 | 0.989 | 5110  | protein-L-isoaspartate (D-aspartate) O-methyltransferase                     |
| GO | endoplasmic reticulum              | 34 | 880 | 0.989 | 5140  | phosphodiesterase 3B, cGMP-inhibited                                         |
| GO | endoplasmic reticulum              | 34 | 880 | 0.989 | 57333 | reticulocalbin 3, EF-hand calcium binding domain                             |
| GO | endoplasmic reticulum              | 34 | 880 | 0.989 | 581   | BCL2-associated X protein                                                    |
| GO | endoplasmic reticulum              | 34 | 880 | 0.989 | 590   | butyrylcholinesterase                                                        |
| GO | endoplasmic reticulum              | 34 | 880 | 0.989 | 5924  | Ras protein-specific guanine nucleotide-releasing factor 2                   |
| GO | endoplasmic reticulum              | 34 | 880 | 0.989 | 64131 | xylosyltransferase I                                                         |
| GO | endoplasmic reticulum              | 34 | 880 | 0.989 | 6683  | spastin                                                                      |
| GO | endoplasmic reticulum              | 34 | 880 | 0.989 | 6785  | elongation of very long chain fatty acids (FEN1/Elo2, SUR4/Elo3, yeast)-like |
| GO | endoplasmic reticulum              | 34 | 880 | 0.989 | 79071 | ELOVL family member 6, elongation of long chain fatty acids (FEN1/Elo2, SL   |
| GO | endoplasmic reticulum              | 34 | 880 | 0.989 | 79669 | chromosome 3 open reading frame 52                                           |
| GO | endoplasmic reticulum              | 34 | 880 | 0.989 | 79993 | ELOVL family member 7, elongation of long chain fatty acids (yeast)          |
| GO | endoplasmic reticulum              | 34 | 880 | 0.989 | 81562 | lectin, mannose-binding 2-like                                               |
| GO | endoplasmic reticulum              | 34 | 880 | 0.989 | 84230 | leucine rich repeat containing 8 family, member C                            |
| GO | endoplasmic reticulum              | 34 | 880 | 0.989 | 90701 | SEC11 homolog C ( <i>S. cerevisiae</i> )                                     |
| GO | endoplasmic reticulum              | 34 | 880 | 0.989 | 9420  | cytochrome P450, family 7, subfamily B, polypeptide 1                        |
| GO | endoplasmic reticulum              | 34 | 880 | 0.989 | 9482  | syntaxin 8                                                                   |
| GO | histone H3 acetylation             | 1  | 24  | 0.989 | 10474 | transcriptional adaptor 3                                                    |
| GO | transcription coactivator activity | 7  | 192 | 0.989 | 10474 | transcriptional adaptor 3                                                    |
| GO | transcription coactivator activity | 7  | 192 | 0.989 | 5469  | mediator complex subunit 1                                                   |
| GO | transcription coactivator activity | 7  | 192 | 0.989 | 5702  | proteasome (prosome, macropain) 26S subunit, ATPase, 3                       |
| GO | transcription coactivator activity | 7  | 192 | 0.989 | 6672  | SP100 nuclear antigen                                                        |
| GO | transcription coactivator activity | 7  | 192 | 0.989 | 672   | breast cancer 1, early onset                                                 |
| GO | transcription coactivator activity | 7  | 192 | 0.989 | 7021  | transcription factor AP-2 beta (activating enhancer binding protein 2 beta)  |
| GO | transcription coactivator activity | 7  | 192 | 0.989 | 898   | cyclin E1                                                                    |
| GO | microsome                          | 10 | 219 | 0.989 | 10492 | synaptotagmin binding, cytoplasmic RNA interacting protein                   |
| GO | microsome                          | 10 | 219 | 0.989 | 13    | arylacetamide deacetylase (esterase)                                         |
| GO | microsome                          | 10 | 219 | 0.989 | 1543  | cytochrome P450, family 1, subfamily A, polypeptide 1                        |
| GO | microsome                          | 10 | 219 | 0.989 | 1733  | deiodinase, iodothyronine, type I                                            |
| GO | microsome                          | 10 | 219 | 0.989 | 23305 | acyl-CoA synthetase long-chain family member 6                               |
| GO | microsome                          | 10 | 219 | 0.989 | 4830  | non-metastatic cells 1, protein (NM23A) expressed in                         |
| GO | microsome                          | 10 | 219 | 0.989 | 51062 | atlastin GTPase 1                                                            |
| GO | microsome                          | 10 | 219 | 0.989 | 5140  | phosphodiesterase 3B, cGMP-inhibited                                         |
| GO | microsome                          | 10 | 219 | 0.989 | 90701 | SEC11 homolog C ( <i>S. cerevisiae</i> )                                     |
| GO | microsome                          | 10 | 219 | 0.989 | 9420  | cytochrome P450, family 7, subfamily B, polypeptide 1                        |
| GO | blood vessel remodeling            | 1  | 22  | 0.989 | 10512 | sema domain, immunoglobulin domain (Ig), short basic domain, secreted, (     |

|    |                     |    |      |       |        |                                                                               |
|----|---------------------|----|------|-------|--------|-------------------------------------------------------------------------------|
| GO | extracellular space | 26 | 647  | 0.989 | 10512  | sema domain, immunoglobulin domain (Ig), short basic domain, secreted, (      |
| GO | extracellular space | 26 | 647  | 0.989 | 112616 | CKLF-like MARVEL transmembrane domain containing 7                            |
| GO | extracellular space | 26 | 647  | 0.989 | 123920 | CKLF-like MARVEL transmembrane domain containing 3                            |
| GO | extracellular space | 26 | 647  | 0.989 | 2321   | fms-related tyrosine kinase 1 (vascular endothelial growth factor/vascular p  |
| GO | extracellular space | 26 | 647  | 0.989 | 24147  | four jointed box 1 (Drosophila)                                               |
| GO | extracellular space | 26 | 647  | 0.989 | 2878   | glutathione peroxidase 3 (plasma)                                             |
| GO | extracellular space | 26 | 647  | 0.989 | 348    | apolipoprotein E                                                              |
| GO | extracellular space | 26 | 647  | 0.989 | 3557   | interleukin 1 receptor antagonist                                             |
| GO | extracellular space | 26 | 647  | 0.989 | 3589   | interleukin 11                                                                |
| GO | extracellular space | 26 | 647  | 0.989 | 3952   | leptin                                                                        |
| GO | extracellular space | 26 | 647  | 0.989 | 4318   | matrix metallopeptidase 9 (gelatinase B, 92kDa gelatinase, 92kDa type IV c    |
| GO | extracellular space | 26 | 647  | 0.989 | 4319   | matrix metallopeptidase 10 (stromelysin 2)                                    |
| GO | extracellular space | 26 | 647  | 0.989 | 5054   | serpin peptidase inhibitor, clade E (nexin, plasminogen activator inhibitor t |
| GO | extracellular space | 26 | 647  | 0.989 | 5125   | proprotein convertase subtilisin/kexin type 5                                 |
| GO | extracellular space | 26 | 647  | 0.989 | 5228   | placental growth factor                                                       |
| GO | extracellular space | 26 | 647  | 0.989 | 5654   | HtrA serine peptidase 1                                                       |
| GO | extracellular space | 26 | 647  | 0.989 | 5744   | parathyroid hormone-like hormone                                              |
| GO | extracellular space | 26 | 647  | 0.989 | 57642  | collagen, type XX, alpha 1                                                    |
| GO | extracellular space | 26 | 647  | 0.989 | 590    | butyrylcholinesterase                                                         |
| GO | extracellular space | 26 | 647  | 0.989 | 6347   | chemokine (C-C motif) ligand 2                                                |
| GO | extracellular space | 26 | 647  | 0.989 | 6422   | secreted frizzled-related protein 1                                           |
| GO | extracellular space | 26 | 647  | 0.989 | 6586   | slit homolog 3 (Drosophila)                                                   |
| GO | extracellular space | 26 | 647  | 0.989 | 7857   | secretogranin II (chromogranin C)                                             |
| GO | extracellular space | 26 | 647  | 0.989 | 81029  | wingless-type MMTV integration site family, member 5B                         |
| GO | extracellular space | 26 | 647  | 0.989 | 8788   | delta-like 1 homolog (Drosophila)                                             |
| GO | extracellular space | 26 | 647  | 0.989 | 9244   | cytokine receptor-like factor 1                                               |
| GO | immune response     | 9  | 303  | 0.989 | 10512  | sema domain, immunoglobulin domain (Ig), short basic domain, secreted, (      |
| GO | immune response     | 9  | 303  | 0.989 | 2533   | FYN binding protein (FYB-120/130)                                             |
| GO | immune response     | 9  | 303  | 0.989 | 353091 | retinoic acid early transcript 1G                                             |
| GO | immune response     | 9  | 303  | 0.989 | 355    | Fas (TNF receptor superfamily, member 6)                                      |
| GO | immune response     | 9  | 303  | 0.989 | 3557   | interleukin 1 receptor antagonist                                             |
| GO | immune response     | 9  | 303  | 0.989 | 56241  | sushi domain containing 2                                                     |
| GO | immune response     | 9  | 303  | 0.989 | 57817  | hepcidin antimicrobial peptide                                                |
| GO | immune response     | 9  | 303  | 0.989 | 729230 | chemokine (C-C motif) receptor 2                                              |
| GO | immune response     | 9  | 303  | 0.989 | 8482   | semaphorin 7A, GPI membrane anchor (John Milton Hagen blood group)            |
| GO | receptor activity   | 52 | 1148 | 0.989 | 10512  | sema domain, immunoglobulin domain (Ig), short basic domain, secreted, (      |

|    |                   |    |      |       |        |                                                                              |
|----|-------------------|----|------|-------|--------|------------------------------------------------------------------------------|
| GO | receptor activity | 52 | 1148 | 0.989 | 1136   | cholinergic receptor, nicotinic, alpha 3                                     |
| GO | receptor activity | 52 | 1148 | 0.989 | 1138   | cholinergic receptor, nicotinic, alpha 5                                     |
| GO | receptor activity | 52 | 1148 | 0.989 | 119749 | olfactory receptor, family 4, subfamily C, member 46                         |
| GO | receptor activity | 52 | 1148 | 0.989 | 125962 | olfactory receptor, family 7, subfamily G, member 1                          |
| GO | receptor activity | 52 | 1148 | 0.989 | 131450 | CD200 receptor 1                                                             |
| GO | receptor activity | 52 | 1148 | 0.989 | 146760 | reticulon 4 receptor-like 1                                                  |
| GO | receptor activity | 52 | 1148 | 0.989 | 2045   | EPH receptor A7                                                              |
| GO | receptor activity | 52 | 1148 | 0.989 | 2149   | coagulation factor II (thrombin) receptor                                    |
| GO | receptor activity | 52 | 1148 | 0.989 | 2150   | coagulation factor II (thrombin) receptor-like 1                             |
| GO | receptor activity | 52 | 1148 | 0.989 | 2151   | coagulation factor II (thrombin) receptor-like 2                             |
| GO | receptor activity | 52 | 1148 | 0.989 | 2264   | fibroblast growth factor receptor 4                                          |
| GO | receptor activity | 52 | 1148 | 0.989 | 22801  | integrin, alpha 11                                                           |
| GO | receptor activity | 52 | 1148 | 0.989 | 2321   | fms-related tyrosine kinase 1 (vascular endothelial growth factor/vascular p |
| GO | receptor activity | 52 | 1148 | 0.989 | 23432  | G protein-coupled receptor 161                                               |
| GO | receptor activity | 52 | 1148 | 0.989 | 2558   | gamma-aminobutyric acid (GABA) A receptor, alpha 5                           |
| GO | receptor activity | 52 | 1148 | 0.989 | 282770 | olfactory receptor, family 10, subfamily AG, member 1                        |
| GO | receptor activity | 52 | 1148 | 0.989 | 283111 | olfactory receptor, family 51, subfamily V, member 1                         |
| GO | receptor activity | 52 | 1148 | 0.989 | 2842   | G protein-coupled receptor 19                                                |
| GO | receptor activity | 52 | 1148 | 0.989 | 2845   | G protein-coupled receptor 22                                                |
| GO | receptor activity | 52 | 1148 | 0.989 | 2850   | G protein-coupled receptor 27                                                |
| GO | receptor activity | 52 | 1148 | 0.989 | 285659 | olfactory receptor, family 2, subfamily V, member 2                          |
| GO | receptor activity | 52 | 1148 | 0.989 | 2863   | G protein-coupled receptor 39                                                |
| GO | receptor activity | 52 | 1148 | 0.989 | 2898   | glutamate receptor, ionotropic, kainate 2                                    |
| GO | receptor activity | 52 | 1148 | 0.989 | 2906   | glutamate receptor, ionotropic, N-methyl D-aspartate 2D                      |
| GO | receptor activity | 52 | 1148 | 0.989 | 344838 | progesterin and adipoQ receptor family member IX                             |
| GO | receptor activity | 52 | 1148 | 0.989 | 348938 | NIPA-like domain containing 4                                                |
| GO | receptor activity | 52 | 1148 | 0.989 | 355    | Fas (TNF receptor superfamily, member 6)                                     |
| GO | receptor activity | 52 | 1148 | 0.989 | 3685   | integrin, alpha V (vitronectin receptor, alpha polypeptide, antigen CD51)    |
| GO | receptor activity | 52 | 1148 | 0.989 | 3694   | integrin, beta 6                                                             |
| GO | receptor activity | 52 | 1148 | 0.989 | 390061 | olfactory receptor, family 51, subfamily Q, member 1                         |
| GO | receptor activity | 52 | 1148 | 0.989 | 391114 | olfactory receptor, family 6, subfamily K, member 3                          |
| GO | receptor activity | 52 | 1148 | 0.989 | 4158   | melanocortin 2 receptor (adrenocorticotrophic hormone)                       |
| GO | receptor activity | 52 | 1148 | 0.989 | 5021   | oxytocin receptor                                                            |
| GO | receptor activity | 52 | 1148 | 0.989 | 5028   | purinergic receptor P2Y, G-protein coupled, 1                                |
| GO | receptor activity | 52 | 1148 | 0.989 | 5031   | pyrimidinergic receptor P2Y, G-protein coupled, 6                            |
| GO | receptor activity | 52 | 1148 | 0.989 | 53637  | sphingosine-1-phosphate receptor 5                                           |

|    |                   |    |      |       |                                                                            |
|----|-------------------|----|------|-------|----------------------------------------------------------------------------|
| GO | receptor activity | 52 | 1148 | 0.989 | 54210 triggering receptor expressed on myeloid cells 1                     |
| GO | receptor activity | 52 | 1148 | 0.989 | 5469 mediator complex subunit 1                                            |
| GO | receptor activity | 52 | 1148 | 0.989 | 54756 interleukin 17 receptor D                                            |
| GO | receptor activity | 52 | 1148 | 0.989 | 558 AXL receptor tyrosine kinase                                           |
| GO | receptor activity | 52 | 1148 | 0.989 | 5754 PTK7 protein tyrosine kinase 7                                        |
| GO | receptor activity | 52 | 1148 | 0.989 | 659 bone morphogenetic protein receptor, type II (serine/threonine kinase) |
| GO | receptor activity | 52 | 1148 | 0.989 | 6833 ATP-binding cassette, sub-family C (CFTR/MRP), member 8               |
| GO | receptor activity | 52 | 1148 | 0.989 | 7010 TEK tyrosine kinase, endothelial                                      |
| GO | receptor activity | 52 | 1148 | 0.989 | 7037 transferrin receptor (p90, CD71)                                      |
| GO | receptor activity | 52 | 1148 | 0.989 | 7046 transforming growth factor, beta receptor 1                           |
| GO | receptor activity | 52 | 1148 | 0.989 | 729230 chemokine (C-C motif) receptor 2                                    |
| GO | receptor activity | 52 | 1148 | 0.989 | 8482 semaphorin 7A, GPI membrane anchor (John Milton Hagen blood group)    |
| GO | receptor activity | 52 | 1148 | 0.989 | 91584 plexin A4                                                            |
| GO | receptor activity | 52 | 1148 | 0.989 | 9244 cytokine receptor-like factor 1                                       |
| GO | receptor activity | 52 | 1148 | 0.989 | 9568 gamma-aminobutyric acid (GABA) B receptor, 2                          |
| GO | cell cortex       | 2  | 75   | 0.989 | 10539 glutaredoxin 3                                                       |
| GO | cell cortex       | 2  | 75   | 0.989 | 4734 neural precursor cell expressed, developmentally down-regulated 4     |
| GO | Z disc            | 2  | 46   | 0.989 | 10539 glutaredoxin 3                                                       |
| GO | Z disc            | 2  | 46   | 0.989 | 91624 nexilin (F actin binding protein)                                    |
| GO | protein transport | 16 | 388  | 0.989 | 10612 tripartite motif-containing 3                                        |
| GO | protein transport | 16 | 388  | 0.989 | 10890 RAB10, member RAS oncogene family                                    |
| GO | protein transport | 16 | 388  | 0.989 | 11154 adaptor-related protein complex 4, sigma 1 subunit                   |
| GO | protein transport | 16 | 388  | 0.989 | 1984 eukaryotic translation initiation factor 5A                           |
| GO | protein transport | 16 | 388  | 0.989 | 26519 translocase of inner mitochondrial membrane 10 homolog (yeast)       |
| GO | protein transport | 16 | 388  | 0.989 | 26521 translocase of inner mitochondrial membrane 8 homolog B (yeast)      |
| GO | protein transport | 16 | 388  | 0.989 | 29887 sorting nexin 10                                                     |
| GO | protein transport | 16 | 388  | 0.989 | 409 arrestin, beta 2                                                       |
| GO | protein transport | 16 | 388  | 0.989 | 4928 nucleoporin 98kDa                                                     |
| GO | protein transport | 16 | 388  | 0.989 | 55916 nuclear transport factor 2-like export factor 2                      |
| GO | protein transport | 16 | 388  | 0.989 | 64393 zinc finger, matrin type 3                                           |
| GO | protein transport | 16 | 388  | 0.989 | 729025 solute carrier family 15, member 5                                  |
| GO | protein transport | 16 | 388  | 0.989 | 81562 lectin, mannose-binding 2-like                                       |
| GO | protein transport | 16 | 388  | 0.989 | 83871 RAB34, member RAS oncogene family                                    |
| GO | protein transport | 16 | 388  | 0.989 | 9688 nucleoporin 93kDa                                                     |
| GO | protein transport | 16 | 388  | 0.989 | 9744 ArfGAP with coiled-coil, ankyrin repeat and PH domains 1              |
| GO | response to virus | 3  | 105  | 0.989 | 10622 polymerase (RNA) III (DNA directed) polypeptide G (32kD)             |



|    |                             |    |     |       |        |                                                                          |
|----|-----------------------------|----|-----|-------|--------|--------------------------------------------------------------------------|
| GO | response to virus           | 3  | 105 | 0.989 | 1543   | cytochrome P450, family 1, subfamily A, polypeptide 1                    |
| GO | response to virus           | 3  | 105 | 0.989 | 59     | actin, alpha 2, smooth muscle, aorta                                     |
| GO | regulation of transcription | 37 | 956 | 0.989 | 10656  | KH domain containing, RNA binding, signal transduction associated 3      |
| GO | regulation of transcription | 37 | 956 | 0.989 | 1161   | excision repair cross-complementing rodent repair deficiency, complement |
| GO | regulation of transcription | 37 | 956 | 0.989 | 116931 | mediator complex subunit 12-like                                         |
| GO | regulation of transcription | 37 | 956 | 0.989 | 126374 | Wilms tumor 1 interacting protein                                        |
| GO | regulation of transcription | 37 | 956 | 0.989 | 132625 | zinc finger protein 42 homolog (mouse)                                   |
| GO | regulation of transcription | 37 | 956 | 0.989 | 148213 | zinc finger protein 681                                                  |
| GO | regulation of transcription | 37 | 956 | 0.989 | 195828 | zinc finger protein 367                                                  |
| GO | regulation of transcription | 37 | 956 | 0.989 | 2139   | eyes absent homolog 2 (Drosophila)                                       |
| GO | regulation of transcription | 37 | 956 | 0.989 | 284443 | zinc finger protein 493                                                  |
| GO | regulation of transcription | 37 | 956 | 0.989 | 29128  | ubiquitin-like with PHD and ring finger domains 1                        |
| GO | regulation of transcription | 37 | 956 | 0.989 | 2965   | general transcription factor IIH, polypeptide 1, 62kDa                   |
| GO | regulation of transcription | 37 | 956 | 0.989 | 29842  | transcription factor CP2-like 1                                          |
| GO | regulation of transcription | 37 | 956 | 0.989 | 29995  | LIM and cysteine-rich domains 1                                          |
| GO | regulation of transcription | 37 | 956 | 0.989 | 401265 | kelch-like 31 (Drosophila)                                               |
| GO | regulation of transcription | 37 | 956 | 0.989 | 4171   | minichromosome maintenance complex component 2                           |
| GO | regulation of transcription | 37 | 956 | 0.989 | 4287   | ataxin 3                                                                 |
| GO | regulation of transcription | 37 | 956 | 0.989 | 51003  | mediator complex subunit 31                                              |
| GO | regulation of transcription | 37 | 956 | 0.989 | 51460  | Scm-like with four mbt domains 1                                         |
| GO | regulation of transcription | 37 | 956 | 0.989 | 5245   | prohibitin                                                               |
| GO | regulation of transcription | 37 | 956 | 0.989 | 5469   | mediator complex subunit 1                                               |
| GO | regulation of transcription | 37 | 956 | 0.989 | 54796  | basonuclin 2                                                             |
| GO | regulation of transcription | 37 | 956 | 0.989 | 58499  | zinc finger protein 462                                                  |
| GO | regulation of transcription | 37 | 956 | 0.989 | 59336  | PR domain containing 13                                                  |
| GO | regulation of transcription | 37 | 956 | 0.989 | 6299   | sal-like 1 (Drosophila)                                                  |
| GO | regulation of transcription | 37 | 956 | 0.989 | 6591   | snail homolog 2 (Drosophila)                                             |
| GO | regulation of transcription | 37 | 956 | 0.989 | 7046   | transforming growth factor, beta receptor 1                              |
| GO | regulation of transcription | 37 | 956 | 0.989 | 7552   | zinc finger protein 711                                                  |
| GO | regulation of transcription | 37 | 956 | 0.989 | 79682  | MLF1 interacting protein                                                 |
| GO | regulation of transcription | 37 | 956 | 0.989 | 81606  | limb bud and heart development homolog (mouse)                           |
| GO | regulation of transcription | 37 | 956 | 0.989 | 81892  | chromosome 14 open reading frame 156                                     |
| GO | regulation of transcription | 37 | 956 | 0.989 | 8193   | D4, zinc and double PHD fingers family 1                                 |
| GO | regulation of transcription | 37 | 956 | 0.989 | 83879  | cell division cycle associated 7                                         |
| GO | regulation of transcription | 37 | 956 | 0.989 | 8458   | transcription termination factor, RNA polymerase II                      |
| GO | regulation of transcription | 37 | 956 | 0.989 | 84622  | zinc finger protein 594                                                  |

|    |                                         |    |     |       |        |                                                                               |
|----|-----------------------------------------|----|-----|-------|--------|-------------------------------------------------------------------------------|
| GO | regulation of transcription             | 37 | 956 | 0.989 | 84878  | zinc finger and BTB domain containing 45                                      |
| GO | regulation of transcription             | 37 | 956 | 0.989 | 9242   | musculin (activated B-cell factor-1)                                          |
| GO | regulation of transcription             | 37 | 956 | 0.989 | 93649  | myocardin                                                                     |
| GO | SH3 domain binding                      | 4  | 97  | 0.989 | 10656  | KH domain containing, RNA binding, signal transduction associated 3           |
| GO | SH3 domain binding                      | 4  | 97  | 0.989 | 30011  | SH3-domain kinase binding protein 1                                           |
| GO | SH3 domain binding                      | 4  | 97  | 0.989 | 8728   | ADAM metallopeptidase domain 19 (meltrin beta)                                |
| GO | SH3 domain binding                      | 4  | 97  | 0.989 | 9732   | dedicator of cytokinesis 4                                                    |
| GO | brush border membrane                   | 1  | 26  | 0.989 | 10672  | guanine nucleotide binding protein (G protein), alpha 13                      |
| GO | G-protein coupled receptor protein sign | 27 | 725 | 0.989 | 10672  | guanine nucleotide binding protein (G protein), alpha 13                      |
| GO | G-protein coupled receptor protein sign | 27 | 725 | 0.989 | 119749 | olfactory receptor, family 4, subfamily C, member 46                          |
| GO | G-protein coupled receptor protein sign | 27 | 725 | 0.989 | 125962 | olfactory receptor, family 7, subfamily G, member 1                           |
| GO | G-protein coupled receptor protein sign | 27 | 725 | 0.989 | 2150   | coagulation factor II (thrombin) receptor-like 1                              |
| GO | G-protein coupled receptor protein sign | 27 | 725 | 0.989 | 2151   | coagulation factor II (thrombin) receptor-like 2                              |
| GO | G-protein coupled receptor protein sign | 27 | 725 | 0.989 | 222611 | G protein-coupled receptor 111                                                |
| GO | G-protein coupled receptor protein sign | 27 | 725 | 0.989 | 23432  | G protein-coupled receptor 161                                                |
| GO | G-protein coupled receptor protein sign | 27 | 725 | 0.989 | 2774   | guanine nucleotide binding protein (G protein), alpha activating activity pol |
| GO | G-protein coupled receptor protein sign | 27 | 725 | 0.989 | 282770 | olfactory receptor, family 10, subfamily AG, member 1                         |
| GO | G-protein coupled receptor protein sign | 27 | 725 | 0.989 | 283111 | olfactory receptor, family 51, subfamily V, member 1                          |
| GO | G-protein coupled receptor protein sign | 27 | 725 | 0.989 | 2842   | G protein-coupled receptor 19                                                 |
| GO | G-protein coupled receptor protein sign | 27 | 725 | 0.989 | 2845   | G protein-coupled receptor 22                                                 |
| GO | G-protein coupled receptor protein sign | 27 | 725 | 0.989 | 2850   | G protein-coupled receptor 27                                                 |
| GO | G-protein coupled receptor protein sign | 27 | 725 | 0.989 | 285659 | olfactory receptor, family 2, subfamily V, member 2                           |
| GO | G-protein coupled receptor protein sign | 27 | 725 | 0.989 | 2863   | G protein-coupled receptor 39                                                 |
| GO | G-protein coupled receptor protein sign | 27 | 725 | 0.989 | 348    | apolipoprotein E                                                              |
| GO | G-protein coupled receptor protein sign | 27 | 725 | 0.989 | 390061 | olfactory receptor, family 51, subfamily Q, member 1                          |
| GO | G-protein coupled receptor protein sign | 27 | 725 | 0.989 | 391114 | olfactory receptor, family 6, subfamily K, member 3                           |
| GO | G-protein coupled receptor protein sign | 27 | 725 | 0.989 | 4158   | melanocortin 2 receptor (adrenocorticotrophic hormone)                        |
| GO | G-protein coupled receptor protein sign | 27 | 725 | 0.989 | 5021   | oxytocin receptor                                                             |
| GO | G-protein coupled receptor protein sign | 27 | 725 | 0.989 | 53637  | sphingosine-1-phosphate receptor 5                                            |
| GO | G-protein coupled receptor protein sign | 27 | 725 | 0.989 | 54331  | guanine nucleotide binding protein (G protein), gamma 2                       |
| GO | G-protein coupled receptor protein sign | 27 | 725 | 0.989 | 60675  | prokineticin 2                                                                |
| GO | G-protein coupled receptor protein sign | 27 | 725 | 0.989 | 6347   | chemokine (C-C motif) ligand 2                                                |
| GO | G-protein coupled receptor protein sign | 27 | 725 | 0.989 | 729230 | chemokine (C-C motif) receptor 2                                              |
| GO | G-protein coupled receptor protein sign | 27 | 725 | 0.989 | 8325   | frizzled homolog 8 (Drosophila)                                               |
| GO | G-protein coupled receptor protein sign | 27 | 725 | 0.989 | 9568   | gamma-aminobutyric acid (GABA) B receptor, 2                                  |
| GO | in utero embryonic development          | 6  | 136 | 0.989 | 10672  | guanine nucleotide binding protein (G protein), alpha 13                      |

|    |                                |    |     |       |        |                                                                         |
|----|--------------------------------|----|-----|-------|--------|-------------------------------------------------------------------------|
| GO | in utero embryonic development | 6  | 136 | 0.989 | 2736   | GLI family zinc finger 2                                                |
| GO | in utero embryonic development | 6  | 136 | 0.989 | 3276   | protein arginine methyltransferase 1                                    |
| GO | in utero embryonic development | 6  | 136 | 0.989 | 4436   | mutS homolog 2, colon cancer, nonpolyposis type 1 (E. coli)             |
| GO | in utero embryonic development | 6  | 136 | 0.989 | 7046   | transforming growth factor, beta receptor 1                             |
| GO | in utero embryonic development | 6  | 136 | 0.989 | 8533   | COP9 constitutive photomorphogenic homolog subunit 3 (Arabidopsis)      |
| GO | molecular_function             | 19 | 577 | 0.989 | 10761  | placenta-specific 1                                                     |
| GO | molecular_function             | 19 | 577 | 0.989 | 10777  | cyclic AMP-regulated phosphoprotein, 21 kD                              |
| GO | molecular_function             | 19 | 577 | 0.989 | 10962  | myeloid/lymphoid or mixed-lineage leukemia (trithorax homolog, Drosophi |
| GO | molecular_function             | 19 | 577 | 0.989 | 11249  | neurexophilin 2                                                         |
| GO | molecular_function             | 19 | 577 | 0.989 | 11259  | filamin A interacting protein 1-like                                    |
| GO | molecular_function             | 19 | 577 | 0.989 | 1290   | collagen, type V, alpha 2                                               |
| GO | molecular_function             | 19 | 577 | 0.989 | 132851 | spermatogenesis associated 4                                            |
| GO | molecular_function             | 19 | 577 | 0.989 | 2273   | four and a half LIM domains 1                                           |
| GO | molecular_function             | 19 | 577 | 0.989 | 266727 | MAM domain containing glycosylphosphatidylinositol anchor 1             |
| GO | molecular_function             | 19 | 577 | 0.989 | 27241  | Bardet-Biedl syndrome 9                                                 |
| GO | molecular_function             | 19 | 577 | 0.989 | 54726  | OTU domain containing 4                                                 |
| GO | molecular_function             | 19 | 577 | 0.989 | 54733  | solute carrier family 35, member F2                                     |
| GO | molecular_function             | 19 | 577 | 0.989 | 56651  | chromosome 18 open reading frame 2                                      |
| GO | molecular_function             | 19 | 577 | 0.989 | 64208  | popeye domain containing 3                                              |
| GO | molecular_function             | 19 | 577 | 0.989 | 66000  | transmembrane protein 108                                               |
| GO | molecular_function             | 19 | 577 | 0.989 | 7840   | Alstrom syndrome 1                                                      |
| GO | molecular_function             | 19 | 577 | 0.989 | 8788   | delta-like 1 homolog (Drosophila)                                       |
| GO | molecular_function             | 19 | 577 | 0.989 | 93323  | HAUS augmin-like complex, subunit 8                                     |
| GO | molecular_function             | 19 | 577 | 0.989 | 9805   | secernin 1                                                              |
| GO | response to unfolded protein   | 2  | 49  | 0.989 | 10808  | heat shock 105kDa/110kDa protein 1                                      |
| GO | response to unfolded protein   | 2  | 49  | 0.989 | 3336   | heat shock 10kDa protein 1 (chaperonin 10)                              |
| GO | Golgi apparatus                | 34 | 784 | 0.989 | 10890  | RAB10, member RAS oncogene family                                       |
| GO | Golgi apparatus                | 34 | 784 | 0.989 | 11154  | adaptor-related protein complex 4, sigma 1 subunit                      |
| GO | Golgi apparatus                | 34 | 784 | 0.989 | 11226  | UDP-N-acetyl-alpha-D-galactosamine:polypeptide N-acetylgalactosaminyltr |
| GO | Golgi apparatus                | 34 | 784 | 0.989 | 11227  | UDP-N-acetyl-alpha-D-galactosamine:polypeptide N-acetylgalactosaminyltr |
| GO | Golgi apparatus                | 34 | 784 | 0.989 | 114805 | UDP-N-acetyl-alpha-D-galactosamine:polypeptide N-acetylgalactosaminyltr |
| GO | Golgi apparatus                | 34 | 784 | 0.989 | 152007 | GLI pathogenesis-related 2                                              |
| GO | Golgi apparatus                | 34 | 784 | 0.989 | 1730   | diaphanous homolog 2 (Drosophila)                                       |
| GO | Golgi apparatus                | 34 | 784 | 0.989 | 2149   | coagulation factor II (thrombin) receptor                               |
| GO | Golgi apparatus                | 34 | 784 | 0.989 | 2150   | coagulation factor II (thrombin) receptor-like 1                        |
| GO | Golgi apparatus                | 34 | 784 | 0.989 | 23057  | nicotinamide nucleotide adenylyltransferase 2                           |

|    |                 |    |     |       |                                                                                 |
|----|-----------------|----|-----|-------|---------------------------------------------------------------------------------|
| GO | Golgi apparatus | 34 | 784 | 0.989 | 27065 DNA segment on chromosome 4 (unique) 234 expressed sequence               |
| GO | Golgi apparatus | 34 | 784 | 0.989 | 29940 dermatan sulfate epimerase                                                |
| GO | Golgi apparatus | 34 | 784 | 0.989 | 348 apolipoprotein E                                                            |
| GO | Golgi apparatus | 34 | 784 | 0.989 | 3763 potassium inwardly-rectifying channel, subfamily J, member 6               |
| GO | Golgi apparatus | 34 | 784 | 0.989 | 3932 lymphocyte-specific protein tyrosine kinase                                |
| GO | Golgi apparatus | 34 | 784 | 0.989 | 411 arylsulfatase B                                                             |
| GO | Golgi apparatus | 34 | 784 | 0.989 | 4893 neuroblastoma RAS viral (v-ras) oncogene homolog                           |
| GO | Golgi apparatus | 34 | 784 | 0.989 | 51062 atlastin GTPase 1                                                         |
| GO | Golgi apparatus | 34 | 784 | 0.989 | 5125 proprotein convertase subtilisin/kexin type 5                              |
| GO | Golgi apparatus | 34 | 784 | 0.989 | 5140 phosphodiesterase 3B, cGMP-inhibited                                       |
| GO | Golgi apparatus | 34 | 784 | 0.989 | 54331 guanine nucleotide binding protein (G protein), gamma 2                   |
| GO | Golgi apparatus | 34 | 784 | 0.989 | 54756 interleukin 17 receptor D                                                 |
| GO | Golgi apparatus | 34 | 784 | 0.989 | 57574 membrane-associated ring finger (C3HC4) 4                                 |
| GO | Golgi apparatus | 34 | 784 | 0.989 | 64131 xylosyltransferase I                                                      |
| GO | Golgi apparatus | 34 | 784 | 0.989 | 79623 UDP-N-acetyl-alpha-D-galactosamine:polypeptide N-acetylgalactosaminyltr   |
| GO | Golgi apparatus | 34 | 784 | 0.989 | 79929 MAP6 domain containing 1                                                  |
| GO | Golgi apparatus | 34 | 784 | 0.989 | 81562 lectin, mannose-binding 2-like                                            |
| GO | Golgi apparatus | 34 | 784 | 0.989 | 83871 RAB34, member RAS oncogene family                                         |
| GO | Golgi apparatus | 34 | 784 | 0.989 | 84620 ST6 beta-galactosamide alpha-2,6-sialyltransferase 2                      |
| GO | Golgi apparatus | 34 | 784 | 0.989 | 84752 UDP-GlcNAc:betaGal beta-1,3-N-acetylglucosaminyltransferase 9             |
| GO | Golgi apparatus | 34 | 784 | 0.989 | 8905 adaptor-related protein complex 1, sigma 2 subunit                         |
| GO | Golgi apparatus | 34 | 784 | 0.989 | 9215 like-glycosyltransferase                                                   |
| GO | Golgi apparatus | 34 | 784 | 0.989 | 9653 heparan sulfate 2-O-sulfotransferase 1                                     |
| GO | Golgi apparatus | 34 | 784 | 0.989 | 9910 RAB GTPase activating protein 1-like                                       |
| GO | proteolysis     | 18 | 423 | 0.989 | 10893 matrix metallopeptidase 24 (membrane-inserted)                            |
| GO | proteolysis     | 18 | 423 | 0.989 | 132724 transmembrane protease, serine 11B                                       |
| GO | proteolysis     | 18 | 423 | 0.989 | 25827 F-box and leucine-rich repeat protein 2                                   |
| GO | proteolysis     | 18 | 423 | 0.989 | 27429 HtrA serine peptidase 2                                                   |
| GO | proteolysis     | 18 | 423 | 0.989 | 344805 transmembrane protease, serine 7                                         |
| GO | proteolysis     | 18 | 423 | 0.989 | 4312 matrix metallopeptidase 1 (interstitial collagenase)                       |
| GO | proteolysis     | 18 | 423 | 0.989 | 4318 matrix metallopeptidase 9 (gelatinase B, 92kDa gelatinase, 92kDa type IV c |
| GO | proteolysis     | 18 | 423 | 0.989 | 4319 matrix metallopeptidase 10 (stromelysin 2)                                 |
| GO | proteolysis     | 18 | 423 | 0.989 | 5125 proprotein convertase subtilisin/kexin type 5                              |
| GO | proteolysis     | 18 | 423 | 0.989 | 5184 peptidase D                                                                |
| GO | proteolysis     | 18 | 423 | 0.989 | 5624 protein C (inactivator of coagulation factors Va and VIIIa)                |
| GO | proteolysis     | 18 | 423 | 0.989 | 5654 HtrA serine peptidase 1                                                    |

|    |                                |    |     |       |        |                                                                              |
|----|--------------------------------|----|-----|-------|--------|------------------------------------------------------------------------------|
| GO | proteolysis                    | 18 | 423 | 0.989 | 7037   | transferrin receptor (p90, CD71)                                             |
| GO | proteolysis                    | 18 | 423 | 0.989 | 7113   | transmembrane protease, serine 2                                             |
| GO | proteolysis                    | 18 | 423 | 0.989 | 8728   | ADAM metallopeptidase domain 19 (meltrin beta)                               |
| GO | proteolysis                    | 18 | 423 | 0.989 | 8747   | ADAM metallopeptidase domain 21                                              |
| GO | proteolysis                    | 18 | 423 | 0.989 | 90701  | SEC11 homolog C ( <i>S. cerevisiae</i> )                                     |
| GO | proteolysis                    | 18 | 423 | 0.989 | 9805   | secernin 1                                                                   |
| GO | vesicle-mediated transport     | 3  | 165 | 0.989 | 11149  | blood vessel epicardial substance                                            |
| GO | vesicle-mediated transport     | 3  | 165 | 0.989 | 54843  | synaptotagmin-like 2                                                         |
| GO | vesicle-mediated transport     | 3  | 165 | 0.989 | 8997   | kalirin, RhoGEF kinase                                                       |
| GO | response to stimulus           | 14 | 477 | 0.989 | 1121   | choroideremia (Rab escort protein 1)                                         |
| GO | response to stimulus           | 14 | 477 | 0.989 | 119749 | olfactory receptor, family 4, subfamily C, member 46                         |
| GO | response to stimulus           | 14 | 477 | 0.989 | 125962 | olfactory receptor, family 7, subfamily G, member 1                          |
| GO | response to stimulus           | 14 | 477 | 0.989 | 27241  | Bardet-Biedl syndrome 9                                                      |
| GO | response to stimulus           | 14 | 477 | 0.989 | 282770 | olfactory receptor, family 10, subfamily AG, member 1                        |
| GO | response to stimulus           | 14 | 477 | 0.989 | 283111 | olfactory receptor, family 51, subfamily V, member 1                         |
| GO | response to stimulus           | 14 | 477 | 0.989 | 285659 | olfactory receptor, family 2, subfamily V, member 2                          |
| GO | response to stimulus           | 14 | 477 | 0.989 | 390061 | olfactory receptor, family 51, subfamily Q, member 1                         |
| GO | response to stimulus           | 14 | 477 | 0.989 | 391114 | olfactory receptor, family 6, subfamily K, member 3                          |
| GO | response to stimulus           | 14 | 477 | 0.989 | 5145   | phosphodiesterase 6A, cGMP-specific, rod, alpha                              |
| GO | response to stimulus           | 14 | 477 | 0.989 | 5264   | phytanoyl-CoA 2-hydroxylase                                                  |
| GO | response to stimulus           | 14 | 477 | 0.989 | 6785   | elongation of very long chain fatty acids (FEN1/Elo2, SUR4/Elo3, yeast)-like |
| GO | response to stimulus           | 14 | 477 | 0.989 | 7078   | TIMP metallopeptidase inhibitor 3                                            |
| GO | response to stimulus           | 14 | 477 | 0.989 | 7840   | Alstrom syndrome 1                                                           |
| GO | sugar binding                  | 6  | 161 | 0.989 | 11226  | UDP-N-acetyl-alpha-D-galactosamine:polypeptide N-acetylgalactosaminyltr      |
| GO | sugar binding                  | 6  | 161 | 0.989 | 11227  | UDP-N-acetyl-alpha-D-galactosamine:polypeptide N-acetylgalactosaminyltr      |
| GO | sugar binding                  | 6  | 161 | 0.989 | 114805 | UDP-N-acetyl-alpha-D-galactosamine:polypeptide N-acetylgalactosaminyltr      |
| GO | sugar binding                  | 6  | 161 | 0.989 | 79623  | UDP-N-acetyl-alpha-D-galactosamine:polypeptide N-acetylgalactosaminyltr      |
| GO | sugar binding                  | 6  | 161 | 0.989 | 81035  | collectin sub-family member 12                                               |
| GO | sugar binding                  | 6  | 161 | 0.989 | 81562  | lectin, mannose-binding 2-like                                               |
| GO | SH3/SH2 adaptor activity       | 2  | 50  | 0.989 | 1123   | chimerin (chimaerin) 1                                                       |
| GO | SH3/SH2 adaptor activity       | 2  | 50  | 0.989 | 8835   | suppressor of cytokine signaling 2                                           |
| GO | neuropeptide signaling pathway | 3  | 85  | 0.989 | 11249  | neurexophilin 2                                                              |
| GO | neuropeptide signaling pathway | 3  | 85  | 0.989 | 222611 | G protein-coupled receptor 111                                               |
| GO | neuropeptide signaling pathway | 3  | 85  | 0.989 | 60675  | prokineticin 2                                                               |
| GO | chemotaxis                     | 5  | 117 | 0.989 | 112616 | CKLF-like MARVEL transmembrane domain containing 7                           |
| GO | chemotaxis                     | 5  | 117 | 0.989 | 123920 | CKLF-like MARVEL transmembrane domain containing 3                           |

|    |                             |   |     |       |        |                                                                               |
|----|-----------------------------|---|-----|-------|--------|-------------------------------------------------------------------------------|
| GO | chemotaxis                  | 5 | 117 | 0.989 | 60675  | prokineticin 2                                                                |
| GO | chemotaxis                  | 5 | 117 | 0.989 | 6347   | chemokine (C-C motif) ligand 2                                                |
| GO | chemotaxis                  | 5 | 117 | 0.989 | 729230 | chemokine (C-C motif) receptor 2                                              |
| GO | cytokine activity           | 6 | 143 | 0.989 | 112616 | CKLF-like MARVEL transmembrane domain containing 7                            |
| GO | cytokine activity           | 6 | 143 | 0.989 | 123920 | CKLF-like MARVEL transmembrane domain containing 3                            |
| GO | cytokine activity           | 6 | 143 | 0.989 | 3557   | interleukin 1 receptor antagonist                                             |
| GO | cytokine activity           | 6 | 143 | 0.989 | 3589   | interleukin 11                                                                |
| GO | cytokine activity           | 6 | 143 | 0.989 | 3624   | inhibin, beta A                                                               |
| GO | cytokine activity           | 6 | 143 | 0.989 | 7857   | secretogranin II (chromogranin C)                                             |
| GO | heme binding                | 4 | 110 | 0.989 | 114757 | cytoglobin                                                                    |
| GO | heme binding                | 4 | 110 | 0.989 | 1543   | cytochrome P450, family 1, subfamily A, polypeptide 1                         |
| GO | heme binding                | 4 | 110 | 0.989 | 339761 | cytochrome P450, family 27, subfamily C, polypeptide 1                        |
| GO | heme binding                | 4 | 110 | 0.989 | 9420   | cytochrome P450, family 7, subfamily B, polypeptide 1                         |
| GO | anchored to membrane        | 2 | 109 | 0.989 | 116372 | LY6/PLAUR domain containing 1                                                 |
| GO | anchored to membrane        | 2 | 109 | 0.989 | 8482   | semaphorin 7A, GPI membrane anchor (John Milton Hagen blood group)            |
| GO | olfactory receptor activity | 7 | 290 | 0.989 | 119749 | olfactory receptor, family 4, subfamily C, member 46                          |
| GO | olfactory receptor activity | 7 | 290 | 0.989 | 125962 | olfactory receptor, family 7, subfamily G, member 1                           |
| GO | olfactory receptor activity | 7 | 290 | 0.989 | 282770 | olfactory receptor, family 10, subfamily AG, member 1                         |
| GO | olfactory receptor activity | 7 | 290 | 0.989 | 283111 | olfactory receptor, family 51, subfamily V, member 1                          |
| GO | olfactory receptor activity | 7 | 290 | 0.989 | 285659 | olfactory receptor, family 2, subfamily V, member 2                           |
| GO | olfactory receptor activity | 7 | 290 | 0.989 | 390061 | olfactory receptor, family 51, subfamily Q, member 1                          |
| GO | olfactory receptor activity | 7 | 290 | 0.989 | 391114 | olfactory receptor, family 6, subfamily K, member 3                           |
| GO | sensory perception of smell | 8 | 305 | 0.989 | 119749 | olfactory receptor, family 4, subfamily C, member 46                          |
| GO | sensory perception of smell | 8 | 305 | 0.989 | 125962 | olfactory receptor, family 7, subfamily G, member 1                           |
| GO | sensory perception of smell | 8 | 305 | 0.989 | 130507 | ubiquitin protein ligase E3 component n-recognin 3 (putative)                 |
| GO | sensory perception of smell | 8 | 305 | 0.989 | 282770 | olfactory receptor, family 10, subfamily AG, member 1                         |
| GO | sensory perception of smell | 8 | 305 | 0.989 | 283111 | olfactory receptor, family 51, subfamily V, member 1                          |
| GO | sensory perception of smell | 8 | 305 | 0.989 | 285659 | olfactory receptor, family 2, subfamily V, member 2                           |
| GO | sensory perception of smell | 8 | 305 | 0.989 | 390061 | olfactory receptor, family 51, subfamily Q, member 1                          |
| GO | sensory perception of smell | 8 | 305 | 0.989 | 391114 | olfactory receptor, family 6, subfamily K, member 3                           |
| GO | inflammatory response       | 8 | 222 | 0.989 | 12     | serpin peptidase inhibitor, clade A (alpha-1 antiproteinase, antitrypsin), me |
| GO | inflammatory response       | 8 | 222 | 0.989 | 2149   | coagulation factor II (thrombin) receptor                                     |
| GO | inflammatory response       | 8 | 222 | 0.989 | 3557   | interleukin 1 receptor antagonist                                             |
| GO | inflammatory response       | 8 | 222 | 0.989 | 3694   | integrin, beta 6                                                              |
| GO | inflammatory response       | 8 | 222 | 0.989 | 60675  | prokineticin 2                                                                |
| GO | inflammatory response       | 8 | 222 | 0.989 | 6347   | chemokine (C-C motif) ligand 2                                                |

|    |                                          |   |     |       |        |                                                                               |
|----|------------------------------------------|---|-----|-------|--------|-------------------------------------------------------------------------------|
| GO | inflammatory response                    | 8 | 222 | 0.989 | 729230 | chemokine (C-C motif) receptor 2                                              |
| GO | inflammatory response                    | 8 | 222 | 0.989 | 7857   | secretogranin II (chromogranin C)                                             |
| GO | serine-type endopeptidase inhibitor act  | 2 | 90  | 0.989 | 12     | serpin peptidase inhibitor, clade A (alpha-1 antiproteinase, antitrypsin), me |
| GO | serine-type endopeptidase inhibitor act  | 2 | 90  | 0.989 | 5054   | serpin peptidase inhibitor, clade E (nexin, plasminogen activator inhibitor t |
| GO | positive regulation of NF-kappaB transci | 1 | 47  | 0.989 | 121268 | Ras homolog enriched in brain like 1                                          |
| GO | protein amino acid dephosphorylation     | 3 | 120 | 0.989 | 128853 | dual specificity phosphatase 15                                               |
| GO | protein amino acid dephosphorylation     | 3 | 120 | 0.989 | 5494   | protein phosphatase, Mg2+/Mn2+ dependent, 1A                                  |
| GO | protein amino acid dephosphorylation     | 3 | 120 | 0.989 | 5795   | protein tyrosine phosphatase, receptor type, J                                |
| GO | protein tyrosine phosphatase activity    | 2 | 82  | 0.989 | 128853 | dual specificity phosphatase 15                                               |
| GO | protein tyrosine phosphatase activity    | 2 | 82  | 0.989 | 2139   | eyes absent homolog 2 (Drosophila)                                            |
| GO | protein tyrosine/serine/threonine phos   | 1 | 30  | 0.989 | 128853 | dual specificity phosphatase 15                                               |
| GO | catalytic activity                       | 5 | 114 | 0.989 | 13     | arylacetamide deacetylase (esterase)                                          |
| GO | catalytic activity                       | 5 | 114 | 0.989 | 3248   | hydroxyprostaglandin dehydrogenase 15-(NAD)                                   |
| GO | catalytic activity                       | 5 | 114 | 0.989 | 3778   | potassium large conductance calcium-activated channel, subfamily M, alph      |
| GO | catalytic activity                       | 5 | 114 | 0.989 | 5264   | phytanoyl-CoA 2-hydroxylase                                                   |
| GO | catalytic activity                       | 5 | 114 | 0.989 | 590    | butyrylcholinesterase                                                         |
| GO | carbohydrate metabolic process           | 8 | 198 | 0.989 | 145173 | beta 1,3-galactosyltransferase-like                                           |
| GO | carbohydrate metabolic process           | 8 | 198 | 0.989 | 23171  | glycerol-3-phosphate dehydrogenase 1-like                                     |
| GO | carbohydrate metabolic process           | 8 | 198 | 0.989 | 283209 | phosphoglucomutase 2-like 1                                                   |
| GO | carbohydrate metabolic process           | 8 | 198 | 0.989 | 6120   | ribulose-5-phosphate-3-epimerase                                              |
| GO | carbohydrate metabolic process           | 8 | 198 | 0.989 | 64080  | ribokinase                                                                    |
| GO | carbohydrate metabolic process           | 8 | 198 | 0.989 | 6518   | solute carrier family 2 (facilitated glucose/fructose transporter), member 5  |
| GO | carbohydrate metabolic process           | 8 | 198 | 0.989 | 669    | 2,3-bisphosphoglycerate mutase                                                |
| GO | carbohydrate metabolic process           | 8 | 198 | 0.989 | 6833   | ATP-binding cassette, sub-family C (CFTR/MRP), member 8                       |
| GO | external side of plasma membrane         | 5 | 121 | 0.989 | 146760 | reticulon 4 receptor-like 1                                                   |
| GO | external side of plasma membrane         | 5 | 121 | 0.989 | 3685   | integrin, alpha V (vitronectin receptor, alpha polypeptide, antigen CD51)     |
| GO | external side of plasma membrane         | 5 | 121 | 0.989 | 3778   | potassium large conductance calcium-activated channel, subfamily M, alph      |
| GO | external side of plasma membrane         | 5 | 121 | 0.989 | 4897   | neuronal cell adhesion molecule                                               |
| GO | external side of plasma membrane         | 5 | 121 | 0.989 | 8788   | delta-like 1 homolog (Drosophila)                                             |
| GO | phosphoprotein phosphatase activity      | 1 | 36  | 0.989 | 147699 | protein phosphatase, Mg2+/Mn2+ dependent, 1N (putative)                       |
| GO | structural constituent of cytoskeleton   | 3 | 73  | 0.989 | 1496   | catenin (cadherin-associated protein), alpha 2                                |
| GO | structural constituent of cytoskeleton   | 3 | 73  | 0.989 | 6711   | spectrin, beta, non-erythrocytic 1                                            |
| GO | structural constituent of cytoskeleton   | 3 | 73  | 0.989 | 7168   | tropomyosin 1 (alpha)                                                         |
| GO | enzyme binding                           | 5 | 114 | 0.989 | 1543   | cytochrome P450, family 1, subfamily A, polypeptide 1                         |
| GO | enzyme binding                           | 5 | 114 | 0.989 | 241    | arachidonate 5-lipoxygenase-activating protein                                |
| GO | enzyme binding                           | 5 | 114 | 0.989 | 332    | baculoviral IAP repeat-containing 5                                           |

|    |                                      |   |     |       |        |                                                                           |
|----|--------------------------------------|---|-----|-------|--------|---------------------------------------------------------------------------|
| GO | enzyme binding                       | 5 | 114 | 0.989 | 590    | butyrylcholinesterase                                                     |
| GO | enzyme binding                       | 5 | 114 | 0.989 | 672    | breast cancer 1, early onset                                              |
| GO | response to lipopolysaccharide       | 3 | 105 | 0.989 | 1543   | cytochrome P450, family 1, subfamily A, polypeptide 1                     |
| GO | response to lipopolysaccharide       | 3 | 105 | 0.989 | 2149   | coagulation factor II (thrombin) receptor                                 |
| GO | response to lipopolysaccharide       | 3 | 105 | 0.989 | 6347   | chemokine (C-C motif) ligand 2                                            |
| GO | acyltransferase activity             | 3 | 133 | 0.989 | 157570 | establishment of cohesion 1 homolog 2 ( <i>S. cerevisiae</i> )            |
| GO | acyltransferase activity             | 3 | 133 | 0.989 | 57678  | glycerol-3-phosphate acyltransferase, mitochondrial                       |
| GO | acyltransferase activity             | 3 | 133 | 0.989 | 8520   | histone acetyltransferase 1                                               |
| GO | cytoplasmic vesicle                  | 9 | 229 | 0.989 | 157753 | transmembrane protein 74                                                  |
| GO | cytoplasmic vesicle                  | 9 | 229 | 0.989 | 23138  | Nedd4 binding protein 3                                                   |
| GO | cytoplasmic vesicle                  | 9 | 229 | 0.989 | 30011  | SH3-domain kinase binding protein 1                                       |
| GO | cytoplasmic vesicle                  | 9 | 229 | 0.989 | 409    | arrestin, beta 2                                                          |
| GO | cytoplasmic vesicle                  | 9 | 229 | 0.989 | 4884   | neuronal pentraxin I                                                      |
| GO | cytoplasmic vesicle                  | 9 | 229 | 0.989 | 528    | ATPase, H+ transporting, lysosomal 42kDa, V1 subunit C1                   |
| GO | cytoplasmic vesicle                  | 9 | 229 | 0.989 | 55016  | membrane-associated ring finger (C3HC4) 1                                 |
| GO | cytoplasmic vesicle                  | 9 | 229 | 0.989 | 55521  | tripartite motif-containing 36                                            |
| GO | cytoplasmic vesicle                  | 9 | 229 | 0.989 | 8905   | adaptor-related protein complex 1, sigma 2 subunit                        |
| GO | lysosomal membrane                   | 2 | 83  | 0.989 | 157753 | transmembrane protein 74                                                  |
| GO | lysosomal membrane                   | 2 | 83  | 0.989 | 55207  | ADP-ribosylation factor-like 8B                                           |
| GO | intracellular membrane-bounded organ | 2 | 127 | 0.989 | 1730   | diaphanous homolog 2 ( <i>Drosophila</i> )                                |
| GO | intracellular membrane-bounded organ | 2 | 127 | 0.989 | 25758  | chromosome 11 open reading frame 41                                       |
| GO | microtubule motor activity           | 3 | 76  | 0.989 | 1781   | dynein, cytoplasmic 1, intermediate chain 2                               |
| GO | microtubule motor activity           | 3 | 76  | 0.989 | 3797   | kinesin family member 3C                                                  |
| GO | microtubule motor activity           | 3 | 76  | 0.989 | 3800   | kinesin family member 5C                                                  |
| GO | chromatin modification               | 5 | 204 | 0.989 | 1788   | DNA (cytosine-5-)-methyltransferase 3 alpha                               |
| GO | chromatin modification               | 5 | 204 | 0.989 | 2139   | eyes absent homolog 2 ( <i>Drosophila</i> )                               |
| GO | chromatin modification               | 5 | 204 | 0.989 | 50485  | SWI/SNF related, matrix associated, actin dependent regulator of chromati |
| GO | chromatin modification               | 5 | 204 | 0.989 | 55506  | H2A histone family, member Y2                                             |
| GO | chromatin modification               | 5 | 204 | 0.989 | 8520   | histone acetyltransferase 1                                               |
| GO | growth factor activity               | 7 | 152 | 0.989 | 182    | jagged 1 (Alagille syndrome)                                              |
| GO | growth factor activity               | 7 | 152 | 0.989 | 3589   | interleukin 11                                                            |
| GO | growth factor activity               | 7 | 152 | 0.989 | 3624   | inhibin, beta A                                                           |
| GO | growth factor activity               | 7 | 152 | 0.989 | 3952   | leptin                                                                    |
| GO | growth factor activity               | 7 | 152 | 0.989 | 5228   | placental growth factor                                                   |
| GO | growth factor activity               | 7 | 152 | 0.989 | 9535   | glia maturation factor, gamma                                             |
| GO | growth factor activity               | 7 | 152 | 0.989 | 9542   | neuregulin 2                                                              |



|    |                                           |    |     |       |                                                                                   |
|----|-------------------------------------------|----|-----|-------|-----------------------------------------------------------------------------------|
| GO | keratinocyte differentiation              | 1  | 29  | 0.989 | 182 jagged 1 (Alagille syndrome)                                                  |
| GO | membrane fraction                         | 15 | 472 | 0.989 | 1836 solute carrier family 26 (sulfate transporter), member 2                     |
| GO | membrane fraction                         | 15 | 472 | 0.989 | 2027 enolase 3 (beta, muscle)                                                     |
| GO | membrane fraction                         | 15 | 472 | 0.989 | 25789 transmembrane protein 59-like                                               |
| GO | membrane fraction                         | 15 | 472 | 0.989 | 2736 GLI family zinc finger 2                                                     |
| GO | membrane fraction                         | 15 | 472 | 0.989 | 2898 glutamate receptor, ionotropic, kainate 2                                    |
| GO | membrane fraction                         | 15 | 472 | 0.989 | 4893 neuroblastoma RAS viral (v-ras) oncogene homolog                             |
| GO | membrane fraction                         | 15 | 472 | 0.989 | 5341 pleckstrin                                                                   |
| GO | membrane fraction                         | 15 | 472 | 0.989 | 54843 synaptotagmin-like 2                                                        |
| GO | membrane fraction                         | 15 | 472 | 0.989 | 5494 protein phosphatase, Mg <sup>2+</sup> /Mn <sup>2+</sup> dependent, 1A        |
| GO | membrane fraction                         | 15 | 472 | 0.989 | 5588 protein kinase C, theta                                                      |
| GO | membrane fraction                         | 15 | 472 | 0.989 | 57099 apoptosis, caspase activation inhibitor                                     |
| GO | membrane fraction                         | 15 | 472 | 0.989 | 590 butyrylcholinesterase                                                         |
| GO | membrane fraction                         | 15 | 472 | 0.989 | 6546 solute carrier family 8 (sodium/calcium exchanger), member 1                 |
| GO | membrane fraction                         | 15 | 472 | 0.989 | 6580 solute carrier family 22 (organic cation transporter), member 1              |
| GO | membrane fraction                         | 15 | 472 | 0.989 | 6586 slit homolog 3 (Drosophila)                                                  |
| GO | regulation of translational initiation    | 1  | 24  | 0.989 | 1983 eukaryotic translation initiation factor 5                                   |
| GO | translation initiation factor activity    | 1  | 49  | 0.989 | 1983 eukaryotic translation initiation factor 5                                   |
| GO | translational initiation                  | 1  | 36  | 0.989 | 1983 eukaryotic translation initiation factor 5                                   |
| GO | positive regulation of cell proliferation | 13 | 290 | 0.989 | 1984 eukaryotic translation initiation factor 5A                                  |
| GO | positive regulation of cell proliferation | 13 | 290 | 0.989 | 2149 coagulation factor II (thrombin) receptor                                    |
| GO | positive regulation of cell proliferation | 13 | 290 | 0.989 | 2264 fibroblast growth factor receptor 4                                          |
| GO | positive regulation of cell proliferation | 13 | 290 | 0.989 | 2305 forkhead box M1                                                              |
| GO | positive regulation of cell proliferation | 13 | 290 | 0.989 | 2321 fms-related tyrosine kinase 1 (vascular endothelial growth factor/vascular r |
| GO | positive regulation of cell proliferation | 13 | 290 | 0.989 | 2736 GLI family zinc finger 2                                                     |
| GO | positive regulation of cell proliferation | 13 | 290 | 0.989 | 3589 interleukin 11                                                               |
| GO | positive regulation of cell proliferation | 13 | 290 | 0.989 | 4893 neuroblastoma RAS viral (v-ras) oncogene homolog                             |
| GO | positive regulation of cell proliferation | 13 | 290 | 0.989 | 5228 placental growth factor                                                      |
| GO | positive regulation of cell proliferation | 13 | 290 | 0.989 | 5744 parathyroid hormone-like hormone                                             |
| GO | positive regulation of cell proliferation | 13 | 290 | 0.989 | 6659 SRY (sex determining region Y)-box 4                                         |
| GO | positive regulation of cell proliferation | 13 | 290 | 0.989 | 7046 transforming growth factor, beta receptor 1                                  |
| GO | positive regulation of cell proliferation | 13 | 290 | 0.989 | 8872 cell division cycle 123 homolog (S. cerevisiae)                              |
| GO | protein N-terminus binding                | 2  | 72  | 0.989 | 1984 eukaryotic translation initiation factor 5A                                  |
| GO | protein N-terminus binding                | 2  | 72  | 0.989 | 241 arachidonate 5-lipoxygenase-activating protein                                |
| GO | chloride channel complex                  | 2  | 54  | 0.989 | 200959 gamma-aminobutyric acid (GABA) receptor, rho 3                             |
| GO | chloride channel complex                  | 2  | 54  | 0.989 | 2558 gamma-aminobutyric acid (GABA) A receptor, alpha 5                           |

|    |                                            |   |     |       |        |                                                                             |
|----|--------------------------------------------|---|-----|-------|--------|-----------------------------------------------------------------------------|
| GO | activation of protein kinase C activity by | 1 | 34  | 0.989 | 2149   | coagulation factor II (thrombin) receptor                                   |
| GO | anatomical structure morphogenesis         | 4 | 101 | 0.989 | 2149   | coagulation factor II (thrombin) receptor                                   |
| GO | anatomical structure morphogenesis         | 4 | 101 | 0.989 | 5081   | paired box 7                                                                |
| GO | anatomical structure morphogenesis         | 4 | 101 | 0.989 | 6422   | secreted frizzled-related protein 1                                         |
| GO | anatomical structure morphogenesis         | 4 | 101 | 0.989 | 7481   | wingless-type MMTV integration site family, member 11                       |
| GO | positive regulation of I-kappaB kinase/N   | 2 | 109 | 0.989 | 2149   | coagulation factor II (thrombin) receptor                                   |
| GO | positive regulation of I-kappaB kinase/N   | 2 | 109 | 0.989 | 5494   | protein phosphatase, Mg <sup>2+</sup> /Mn <sup>2+</sup> dependent, 1A       |
| GO | blood coagulation                          | 3 | 71  | 0.989 | 2151   | coagulation factor II (thrombin) receptor-like 2                            |
| GO | blood coagulation                          | 3 | 71  | 0.989 | 5028   | purinergic receptor P2Y, G-protein coupled, 1                               |
| GO | blood coagulation                          | 3 | 71  | 0.989 | 953    | ectonucleoside triphosphate diphosphohydrolase 1                            |
| GO | phosphoinositide phospholipase C activ     | 1 | 26  | 0.989 | 2151   | coagulation factor II (thrombin) receptor-like 2                            |
| GO | epidermis development                      | 3 | 75  | 0.989 | 2171   | fatty acid binding protein 5 (psoriasis-associated)                         |
| GO | epidermis development                      | 3 | 75  | 0.989 | 3918   | laminin, gamma 2                                                            |
| GO | epidermis development                      | 3 | 75  | 0.989 | 5744   | parathyroid hormone-like hormone                                            |
| GO | electron transport chain                   | 2 | 86  | 0.989 | 2232   | ferredoxin reductase                                                        |
| GO | electron transport chain                   | 2 | 86  | 0.989 | 4709   | NADH dehydrogenase (ubiquinone) 1 beta subcomplex, 3, 12kDa                 |
| GO | generation of precursor metabolites an     | 1 | 55  | 0.989 | 2232   | ferredoxin reductase                                                        |
| GO | mitochondrial matrix                       | 5 | 147 | 0.989 | 2232   | ferredoxin reductase                                                        |
| GO | mitochondrial matrix                       | 5 | 147 | 0.989 | 26275  | 3-hydroxyisobutyryl-Coenzyme A hydrolase                                    |
| GO | mitochondrial matrix                       | 5 | 147 | 0.989 | 3336   | heat shock 10kDa protein 1 (chaperonin 10)                                  |
| GO | mitochondrial matrix                       | 5 | 147 | 0.989 | 5303   | protein (peptidylprolyl cis/trans isomerase) NIMA-interacting, 4 (parvulin) |
| GO | mitochondrial matrix                       | 5 | 147 | 0.989 | 8659   | aldehyde dehydrogenase 4 family, member A1                                  |
| GO | fibroblast growth factor receptor signali  | 1 | 33  | 0.989 | 2264   | fibroblast growth factor receptor 4                                         |
| GO | cell-matrix adhesion                       | 3 | 68  | 0.989 | 22801  | integrin, alpha 11                                                          |
| GO | cell-matrix adhesion                       | 3 | 68  | 0.989 | 3685   | integrin, alpha V (vitronectin receptor, alpha polypeptide, antigen CD51)   |
| GO | cell-matrix adhesion                       | 3 | 68  | 0.989 | 3694   | integrin, beta 6                                                            |
| GO | insulin secretion                          | 1 | 23  | 0.989 | 2281   | FK506 binding protein 1B, 12.6 kDa                                          |
| GO | mitochondrial outer membrane               | 3 | 81  | 0.989 | 23305  | acyl-CoA synthetase long-chain family member 6                              |
| GO | mitochondrial outer membrane               | 3 | 81  | 0.989 | 57678  | glycerol-3-phosphate acyltransferase, mitochondrial                         |
| GO | mitochondrial outer membrane               | 3 | 81  | 0.989 | 581    | BCL2-associated X protein                                                   |
| GO | peroxisome                                 | 4 | 92  | 0.989 | 23305  | acyl-CoA synthetase long-chain family member 6                              |
| GO | peroxisome                                 | 4 | 92  | 0.989 | 255027 | MPV17 mitochondrial membrane protein-like                                   |
| GO | peroxisome                                 | 4 | 92  | 0.989 | 26061  | 2-hydroxyacyl-CoA lyase 1                                                   |
| GO | peroxisome                                 | 4 | 92  | 0.989 | 5264   | phytanoyl-CoA 2-hydroxylase                                                 |
| GO | synaptic vesicle                           | 2 | 46  | 0.989 | 23705  | cell adhesion molecule 1                                                    |
| GO | synaptic vesicle                           | 2 | 46  | 0.989 | 27445  | piccolo (presynaptic cytomatrix protein)                                    |

|    |                                                |   |     |       |                                                                                          |
|----|------------------------------------------------|---|-----|-------|------------------------------------------------------------------------------------------|
| GO | cell surface receptor linked signaling pathway | 7 | 161 | 0.989 | 2534 FYN oncogene related to SRC, FGR, YES                                               |
| GO | cell surface receptor linked signaling pathway | 7 | 161 | 0.989 | 3276 protein arginine methyltransferase 1                                                |
| GO | cell surface receptor linked signaling pathway | 7 | 161 | 0.989 | 3624 inhibin, beta A                                                                     |
| GO | cell surface receptor linked signaling pathway | 7 | 161 | 0.989 | 5021 oxytocin receptor                                                                   |
| GO | cell surface receptor linked signaling pathway | 7 | 161 | 0.989 | 5028 purinergic receptor P2Y, G-protein coupled, 1                                       |
| GO | cell surface receptor linked signaling pathway | 7 | 161 | 0.989 | 6347 chemokine (C-C motif) ligand 2                                                      |
| GO | cell surface receptor linked signaling pathway | 7 | 161 | 0.989 | 8685 macrophage receptor with collagenous structure                                      |
| GO | feeding behavior                               | 1 | 25  | 0.989 | 2534 FYN oncogene related to SRC, FGR, YES                                               |
| GO | T cell receptor signaling pathway              | 1 | 22  | 0.989 | 2534 FYN oncogene related to SRC, FGR, YES                                               |
| GO | chloride transport                             | 2 | 50  | 0.989 | 2558 gamma-aminobutyric acid (GABA) A receptor, alpha 5                                  |
| GO | chloride transport                             | 2 | 50  | 0.989 | 9635 chloride channel accessory 2                                                        |
| GO | nuclear-transcribed mRNA catabolic process     | 1 | 28  | 0.989 | 26019 UPF2 regulator of nonsense transcripts homolog (yeast)                             |
| GO | guanyl-nucleotide exchange factor activity     | 4 | 120 | 0.989 | 26230 T-cell lymphoma invasion and metastasis 2                                          |
| GO | guanyl-nucleotide exchange factor activity     | 4 | 120 | 0.989 | 5924 Ras protein-specific guanine nucleotide-releasing factor 2                          |
| GO | guanyl-nucleotide exchange factor activity     | 4 | 120 | 0.989 | 8997 kalirin, RhoGEF kinase                                                              |
| GO | guanyl-nucleotide exchange factor activity     | 4 | 120 | 0.989 | 9732 dedicator of cytokinesis 4                                                          |
| GO | mitochondrial inner membrane                   | 7 | 231 | 0.989 | 2628 glycine amidinotransferase (L-arginine:glycine amidinotransferase)                  |
| GO | mitochondrial inner membrane                   | 7 | 231 | 0.989 | 4709 NADH dehydrogenase (ubiquinone) 1 beta subcomplex, 3, 12kDa                         |
| GO | mitochondrial inner membrane                   | 7 | 231 | 0.989 | 516 ATP synthase, H+ transporting, mitochondrial F0 complex, subunit C1 (subunit c)      |
| GO | mitochondrial inner membrane                   | 7 | 231 | 0.989 | 5245 prohibitin                                                                          |
| GO | mitochondrial inner membrane                   | 7 | 231 | 0.989 | 57678 glycerol-3-phosphate acyltransferase, mitochondrial                                |
| GO | mitochondrial inner membrane                   | 7 | 231 | 0.989 | 60386 solute carrier family 25 (mitochondrial thiamine pyrophosphate carrier), member 12 |
| GO | mitochondrial inner membrane                   | 7 | 231 | 0.989 | 8604 solute carrier family 25 (mitochondrial carrier, Aralar), member 12                 |
| GO | microtubule cytoskeleton                       | 2 | 53  | 0.989 | 26586 cytoskeleton associated protein 2                                                  |
| GO | microtubule cytoskeleton                       | 2 | 53  | 0.989 | 6683 spastin                                                                             |
| GO | cilium                                         | 2 | 90  | 0.989 | 27241 Bardet-Biedl syndrome 9                                                            |
| GO | cilium                                         | 2 | 90  | 0.989 | 7840 Alstrom syndrome 1                                                                  |
| GO | actin filament organization                    | 1 | 28  | 0.989 | 27289 Rho family GTPase 1                                                                |
| GO | lung development                               | 2 | 60  | 0.989 | 2736 GLI family zinc finger 2                                                            |
| GO | lung development                               | 2 | 60  | 0.989 | 7046 transforming growth factor, beta receptor 1                                         |
| GO | mammary gland development                      | 1 | 25  | 0.989 | 2736 GLI family zinc finger 2                                                            |
| GO | promoter binding                               | 4 | 101 | 0.989 | 2736 GLI family zinc finger 2                                                            |
| GO | promoter binding                               | 4 | 101 | 0.989 | 6657 SRY (sex determining region Y)-box 2                                                |
| GO | promoter binding                               | 4 | 101 | 0.989 | 6662 SRY (sex determining region Y)-box 9                                                |
| GO | promoter binding                               | 4 | 101 | 0.989 | 7490 Wilms tumor 1                                                                       |
| GO | transcription activator activity               | 9 | 227 | 0.989 | 2736 GLI family zinc finger 2                                                            |

|    |                                            |   |     |       |                                                                                    |
|----|--------------------------------------------|---|-----|-------|------------------------------------------------------------------------------------|
| GO | transcription activator activity           | 9 | 227 | 0.989 | 4603 v-myb myeloblastosis viral oncogene homolog (avian)-like 1                    |
| GO | transcription activator activity           | 9 | 227 | 0.989 | 5245 prohibitin                                                                    |
| GO | transcription activator activity           | 9 | 227 | 0.989 | 5469 mediator complex subunit 1                                                    |
| GO | transcription activator activity           | 9 | 227 | 0.989 | 6299 sal-like 1 (Drosophila)                                                       |
| GO | transcription activator activity           | 9 | 227 | 0.989 | 6662 SRY (sex determining region Y)-box 9                                          |
| GO | transcription activator activity           | 9 | 227 | 0.989 | 672 breast cancer 1, early onset                                                   |
| GO | transcription activator activity           | 9 | 227 | 0.989 | 7490 Wilms tumor 1                                                                 |
| GO | transcription activator activity           | 9 | 227 | 0.989 | 8626 tumor protein p63                                                             |
| GO | mitochondrial membrane                     | 2 | 51  | 0.989 | 27429 HtrA serine peptidase 2                                                      |
| GO | mitochondrial membrane                     | 2 | 51  | 0.989 | 65055 receptor accessory protein 1                                                 |
| GO | mitochondrion organization                 | 1 | 25  | 0.989 | 27429 HtrA serine peptidase 2                                                      |
| GO | response to stress                         | 4 | 112 | 0.989 | 27429 HtrA serine peptidase 2                                                      |
| GO | response to stress                         | 4 | 112 | 0.989 | 65009 NDRG family member 4                                                         |
| GO | response to stress                         | 4 | 112 | 0.989 | 94241 tumor protein p53 inducible nuclear protein 1                                |
| GO | response to stress                         | 4 | 112 | 0.989 | 9448 mitogen-activated protein kinase kinase kinase kinase 4                       |
| GO | inhibition of adenylate cyclase activity b | 1 | 30  | 0.989 | 2774 guanine nucleotide binding protein (G protein), alpha activating activity pol |
| GO | endoplasmic reticulum lumen                | 3 | 68  | 0.989 | 283208 prolyl 4-hydroxylase, alpha polypeptide III                                 |
| GO | endoplasmic reticulum lumen                | 3 | 68  | 0.989 | 57333 reticulocalbin 3, EF-hand calcium binding domain                             |
| GO | endoplasmic reticulum lumen                | 3 | 68  | 0.989 | 590 butyrylcholinesterase                                                          |
| GO | iron ion binding                           | 1 | 65  | 0.989 | 283208 prolyl 4-hydroxylase, alpha polypeptide III                                 |
| GO | transcription factor binding               | 4 | 170 | 0.989 | 2878 glutathione peroxidase 3 (plasma)                                             |
| GO | transcription factor binding               | 4 | 170 | 0.989 | 6672 SP100 nuclear antigen                                                         |
| GO | transcription factor binding               | 4 | 170 | 0.989 | 7029 transcription factor Dp-2 (E2F dimerization partner 2)                        |
| GO | transcription factor binding               | 4 | 170 | 0.989 | 93649 myocardin                                                                    |
| GO | general RNA polymerase II transcription    | 1 | 22  | 0.989 | 2965 general transcription factor IIH, polypeptide 1, 62kDa                        |
| GO | RNA elongation from RNA polymerase II      | 2 | 47  | 0.989 | 2965 general transcription factor IIH, polypeptide 1, 62kDa                        |
| GO | RNA elongation from RNA polymerase II      | 2 | 47  | 0.989 | 5440 polymerase (RNA) II (DNA directed) polypeptide K, 7.0kDa                      |
| GO | cell morphogenesis                         | 1 | 30  | 0.989 | 29842 transcription factor CP2-like 1                                              |
| GO | phosphoinositide binding                   | 1 | 56  | 0.989 | 29887 sorting nexin 10                                                             |
| GO | cell-cell signaling                        | 8 | 238 | 0.989 | 30011 SH3-domain kinase binding protein 1                                          |
| GO | cell-cell signaling                        | 8 | 238 | 0.989 | 3589 interleukin 11                                                                |
| GO | cell-cell signaling                        | 8 | 238 | 0.989 | 3624 inhibin, beta A                                                               |
| GO | cell-cell signaling                        | 8 | 238 | 0.989 | 5125 proprotein convertase subtilisin/kexin type 5                                 |
| GO | cell-cell signaling                        | 8 | 238 | 0.989 | 5228 placental growth factor                                                       |
| GO | cell-cell signaling                        | 8 | 238 | 0.989 | 5744 parathyroid hormone-like hormone                                              |
| GO | cell-cell signaling                        | 8 | 238 | 0.989 | 5795 protein tyrosine phosphatase, receptor type, J                                |

|    |                                          |   |     |       |                                                                             |
|----|------------------------------------------|---|-----|-------|-----------------------------------------------------------------------------|
| GO | cell-cell signaling                      | 8 | 238 | 0.989 | 7010 TEK tyrosine kinase, endothelial                                       |
| GO | steroid binding                          | 1 | 23  | 0.989 | 3028 hydroxysteroid (17-beta) dehydrogenase 10                              |
| GO | cholesterol biosynthetic process         | 1 | 25  | 0.989 | 3157 3-hydroxy-3-methylglutaryl-Coenzyme A synthase 1 (soluble)             |
| GO | transcription repressor activity         | 5 | 173 | 0.989 | 3224 homeobox C8                                                            |
| GO | transcription repressor activity         | 5 | 173 | 0.989 | 5245 prohibitin                                                             |
| GO | transcription repressor activity         | 5 | 173 | 0.989 | 6299 sal-like 1 (Drosophila)                                                |
| GO | transcription repressor activity         | 5 | 173 | 0.989 | 7490 Wilms tumor 1                                                          |
| GO | transcription repressor activity         | 5 | 173 | 0.989 | 8626 tumor protein p63                                                      |
| GO | embryonic skeletal system morphogene     | 1 | 36  | 0.989 | 3236 homeobox D10                                                           |
| GO | fatty acid metabolic process             | 2 | 75  | 0.989 | 3248 hydroxyprostaglandin dehydrogenase 15-(NAD)                            |
| GO | fatty acid metabolic process             | 2 | 75  | 0.989 | 57678 glycerol-3-phosphate acyltransferase, mitochondrial                   |
| GO | cysteine-type endopeptidase inhibitor a  | 1 | 22  | 0.989 | 332 baculoviral IAP repeat-containing 5                                     |
| GO | monooxygenase activity                   | 2 | 52  | 0.989 | 339761 cytochrome P450, family 27, subfamily C, polypeptide 1               |
| GO | monooxygenase activity                   | 2 | 52  | 0.989 | 9420 cytochrome P450, family 7, subfamily B, polypeptide 1                  |
| GO | late endosome                            | 1 | 43  | 0.989 | 348 apolipoprotein E                                                        |
| GO | negative regulation of inflammatory res  | 1 | 24  | 0.989 | 348 apolipoprotein E                                                        |
| GO | phospholipid binding                     | 2 | 49  | 0.989 | 348 apolipoprotein E                                                        |
| GO | phospholipid binding                     | 2 | 49  | 0.989 | 83851 synaptotagmin XVI                                                     |
| GO | negative regulation of transcription, DN | 3 | 91  | 0.989 | 3516 recombination signal binding protein for immunoglobulin kappa J region |
| GO | negative regulation of transcription, DN | 3 | 91  | 0.989 | 6662 SRY (sex determining region Y)-box 9                                   |
| GO | negative regulation of transcription, DN | 3 | 91  | 0.989 | 8626 tumor protein p63                                                      |
| GO | antigen processing and presentation      | 1 | 28  | 0.989 | 353091 retinoic acid early transcript 1G                                    |
| GO | activation of pro-apoptotic gene produc  | 1 | 22  | 0.989 | 355 Fas (TNF receptor superfamily, member 6)                                |
| GO | transmembrane receptor activity          | 5 | 108 | 0.989 | 355 Fas (TNF receptor superfamily, member 6)                                |
| GO | transmembrane receptor activity          | 5 | 108 | 0.989 | 5026 purinergic receptor P2X, ligand-gated ion channel, 5                   |
| GO | transmembrane receptor activity          | 5 | 108 | 0.989 | 84168 anthrax toxin receptor 1                                              |
| GO | transmembrane receptor activity          | 5 | 108 | 0.989 | 8685 macrophage receptor with collagenous structure                         |
| GO | transmembrane receptor activity          | 5 | 108 | 0.989 | 92737 delta/notch-like EGF repeat containing                                |
| GO | positive regulation of peptidyl-tyrosine | 1 | 42  | 0.989 | 3589 interleukin 11                                                         |
| GO | defense response                         | 2 | 63  | 0.989 | 3624 inhibin, beta A                                                        |
| GO | defense response                         | 2 | 63  | 0.989 | 81035 collectin sub-family member 12                                        |
| GO | erythrocyte differentiation              | 1 | 23  | 0.989 | 3624 inhibin, beta A                                                        |
| GO | ovarian follicle development             | 1 | 36  | 0.989 | 3624 inhibin, beta A                                                        |
| GO | cell surface                             | 4 | 214 | 0.989 | 3751 potassium voltage-gated channel, Shal-related subfamily, member 2      |
| GO | cell surface                             | 4 | 214 | 0.989 | 3763 potassium inwardly-rectifying channel, subfamily J, member 6           |
| GO | cell surface                             | 4 | 214 | 0.989 | 659 bone morphogenetic protein receptor, type II (serine/threonine kinase)  |

|    |                                           |   |     |       |        |                                                                           |
|----|-------------------------------------------|---|-----|-------|--------|---------------------------------------------------------------------------|
| GO | cell surface                              | 4 | 214 | 0.989 | 7010   | TEK tyrosine kinase, endothelial                                          |
| GO | potassium channel activity                | 1 | 33  | 0.989 | 3754   | potassium voltage-gated channel, subfamily F, member 1                    |
| GO | cell maturation                           | 1 | 23  | 0.989 | 3778   | potassium large conductance calcium-activated channel, subfamily M, alpha |
| GO | histone deacetylase binding               | 1 | 39  | 0.989 | 3838   | karyopherin alpha 2 (RAG cohort 1, importin alpha 1)                      |
| GO | intermediate filament                     | 2 | 80  | 0.989 | 3883   | keratin 33A                                                               |
| GO | intermediate filament                     | 2 | 80  | 0.989 | 4830   | non-metastatic cells 1, protein (NM23A) expressed in                      |
| GO | keratin filament                          | 1 | 64  | 0.989 | 3887   | keratin 81                                                                |
| GO | gene silencing by RNA                     | 1 | 30  | 0.989 | 389421 | lin-28 homolog B (C. elegans)                                             |
| GO | post-translational protein modification   | 1 | 27  | 0.989 | 389898 | ubiquitin-conjugating enzyme E2N-like                                     |
| GO | response to insulin stimulus              | 2 | 51  | 0.989 | 3952   | leptin                                                                    |
| GO | response to insulin stimulus              | 2 | 51  | 0.989 | 5588   | protein kinase C, theta                                                   |
| GO | transcription factor complex              | 3 | 140 | 0.989 | 406    | aryl hydrocarbon receptor nuclear translocator-like                       |
| GO | transcription factor complex              | 3 | 140 | 0.989 | 6657   | SRY (sex determining region Y)-box 2                                      |
| GO | transcription factor complex              | 3 | 140 | 0.989 | 7029   | transcription factor Dp-2 (E2F dimerization partner 2)                    |
| GO | negative regulation of NF-kappaB trans    | 1 | 22  | 0.989 | 409    | arrestin, beta 2                                                          |
| GO | lysosome organization                     | 1 | 22  | 0.989 | 411    | arylsulfatase B                                                           |
| GO | lysosome                                  | 2 | 144 | 0.989 | 411    | arylsulfatase B                                                           |
| GO | lysosome                                  | 2 | 144 | 0.989 | 57599  | WD repeat domain 48                                                       |
| GO | mitochondrial electron transport, NADH    | 1 | 36  | 0.989 | 4709   | NADH dehydrogenase (ubiquinone) 1 beta subcomplex, 3, 12kDa               |
| GO | mitochondrial respiratory chain comple    | 1 | 39  | 0.989 | 4709   | NADH dehydrogenase (ubiquinone) 1 beta subcomplex, 3, 12kDa               |
| GO | respiratory chain                         | 1 | 42  | 0.989 | 4709   | NADH dehydrogenase (ubiquinone) 1 beta subcomplex, 3, 12kDa               |
| GO | peripheral nervous system developmen      | 1 | 24  | 0.989 | 4763   | neurofibromin 1                                                           |
| GO | pigmentation                              | 1 | 22  | 0.989 | 4763   | neurofibromin 1                                                           |
| GO | wound healing                             | 2 | 49  | 0.989 | 4763   | neurofibromin 1                                                           |
| GO | wound healing                             | 2 | 49  | 0.989 | 7168   | tropomyosin 1 (alpha)                                                     |
| GO | ATP biosynthetic process                  | 1 | 53  | 0.989 | 479    | ATPase, H+/K+ transporting, nongastric, alpha polypeptide                 |
| GO | hydrolase activity, acting on acid anhydi | 2 | 47  | 0.989 | 479    | ATPase, H+/K+ transporting, nongastric, alpha polypeptide                 |
| GO | hydrolase activity, acting on acid anhydi | 2 | 47  | 0.989 | 528    | ATPase, H+ transporting, lysosomal 42kDa, V1 subunit C1                   |
| GO | centrosome                                | 4 | 117 | 0.989 | 4830   | non-metastatic cells 1, protein (NM23A) expressed in                      |
| GO | centrosome                                | 4 | 117 | 0.989 | 7840   | Alstrom syndrome 1                                                        |
| GO | centrosome                                | 4 | 117 | 0.989 | 8409   | ubiquitously-expressed transcript                                         |
| GO | centrosome                                | 4 | 117 | 0.989 | 898    | cyclin E1                                                                 |
| GO | response to cAMP                          | 2 | 46  | 0.989 | 4830   | non-metastatic cells 1, protein (NM23A) expressed in                      |
| GO | response to cAMP                          | 2 | 46  | 0.989 | 9420   | cytochrome P450, family 7, subfamily B, polypeptide 1                     |
| GO | excretion                                 | 1 | 35  | 0.989 | 4867   | nephronophthisis 1 (juvenile)                                             |
| GO | transport vesicle                         | 1 | 39  | 0.989 | 4884   | neuronal pentraxin I                                                      |

|    |                                           |   |     |       |       |                                                                               |
|----|-------------------------------------------|---|-----|-------|-------|-------------------------------------------------------------------------------|
| GO | kinetochore                               | 2 | 49  | 0.989 | 4928  | nucleoporin 98kDa                                                             |
| GO | kinetochore                               | 2 | 49  | 0.989 | 54984 | PIN2-interacting protein 1                                                    |
| GO | hydrolase activity, acting on glycosyl bo | 1 | 44  | 0.989 | 4968  | 8-oxoguanine DNA glycosylase                                                  |
| GO | peptide hormone binding                   | 1 | 22  | 0.989 | 5021  | oxytocin receptor                                                             |
| GO | protease binding                          | 1 | 23  | 0.989 | 5054  | serpin peptidase inhibitor, clade E (nexin, plasminogen activator inhibitor t |
| GO | translational elongation                  | 4 | 87  | 0.989 | 51121 | ribosomal protein L26-like 1                                                  |
| GO | translational elongation                  | 4 | 87  | 0.989 | 6133  | ribosomal protein L9                                                          |
| GO | translational elongation                  | 4 | 87  | 0.989 | 6154  | ribosomal protein L26                                                         |
| GO | translational elongation                  | 4 | 87  | 0.989 | 6204  | ribosomal protein S10                                                         |
| GO | secretory granule                         | 1 | 51  | 0.989 | 5125  | proprotein convertase subtilisin/kexin type 5                                 |
| GO | Wnt receptor signaling pathway            | 3 | 90  | 0.989 | 51339 | dapper, antagonist of beta-catenin, homolog 1 (Xenopus laevis)                |
| GO | Wnt receptor signaling pathway            | 3 | 90  | 0.989 | 5494  | protein phosphatase, Mg2+/Mn2+ dependent, 1A                                  |
| GO | Wnt receptor signaling pathway            | 3 | 90  | 0.989 | 81029 | wingless-type MMTV integration site family, member 5B                         |
| GO | drug binding                              | 1 | 44  | 0.989 | 5140  | phosphodiesterase 3B, cGMP-inhibited                                          |
| GO | insoluble fraction                        | 1 | 39  | 0.989 | 5140  | phosphodiesterase 3B, cGMP-inhibited                                          |
| GO | aminopeptidase activity                   | 1 | 28  | 0.989 | 5184  | peptidase D                                                                   |
| GO | cellular amino acid metabolic process     | 1 | 36  | 0.989 | 5184  | peptidase D                                                                   |
| GO | metallocarboxypeptidase activity          | 1 | 25  | 0.989 | 5184  | peptidase D                                                                   |
| GO | positive regulation of cell division      | 1 | 37  | 0.989 | 5228  | placental growth factor                                                       |
| GO | negative regulation of transcription      | 6 | 148 | 0.989 | 5245  | prohibitin                                                                    |
| GO | negative regulation of transcription      | 6 | 148 | 0.989 | 6672  | SP100 nuclear antigen                                                         |
| GO | negative regulation of transcription      | 6 | 148 | 0.989 | 672   | breast cancer 1, early onset                                                  |
| GO | negative regulation of transcription      | 6 | 148 | 0.989 | 7341  | SMT3 suppressor of mif two 3 homolog 1 (S. cerevisiae)                        |
| GO | negative regulation of transcription      | 6 | 148 | 0.989 | 7490  | Wilms tumor 1                                                                 |
| GO | negative regulation of transcription      | 6 | 148 | 0.989 | 9839  | zinc finger E-box binding homeobox 2                                          |
| GO | apical part of cell                       | 1 | 42  | 0.989 | 528   | ATPase, H+ transporting, lysosomal 42kDa, V1 subunit C1                       |
| GO | cell projection organization              | 1 | 28  | 0.989 | 5341  | pleckstrin                                                                    |
| GO | calcium channel activity                  | 2 | 44  | 0.989 | 54822 | transient receptor potential cation channel, subfamily M, member 7            |
| GO | calcium channel activity                  | 2 | 44  | 0.989 | 7220  | transient receptor potential cation channel, subfamily C, member 1            |
| GO | exocytosis                                | 2 | 47  | 0.989 | 54843 | synaptotagmin-like 2                                                          |
| GO | exocytosis                                | 2 | 47  | 0.989 | 9805  | secernin 1                                                                    |
| GO | amino acid transmembrane transporter      | 1 | 26  | 0.989 | 55117 | solute carrier family 6 (neutral amino acid transporter), member 15           |
| GO | amino acid transport                      | 1 | 46  | 0.989 | 55117 | solute carrier family 6 (neutral amino acid transporter), member 15           |
| GO | neurotransmitter transport                | 1 | 40  | 0.989 | 55117 | solute carrier family 6 (neutral amino acid transporter), member 15           |
| GO | GDP binding                               | 1 | 26  | 0.989 | 55207 | ADP-ribosylation factor-like 8B                                               |
| GO | late endosome membrane                    | 2 | 51  | 0.989 | 55207 | ADP-ribosylation factor-like 8B                                               |

|    |                                            |   |    |       |       |                                                                              |
|----|--------------------------------------------|---|----|-------|-------|------------------------------------------------------------------------------|
| GO | late endosome membrane                     | 2 | 51 | 0.989 | 83930 | STARD3 N-terminal like                                                       |
| GO | acrosomal vesicle                          | 1 | 33 | 0.989 | 55521 | tripartite motif-containing 36                                               |
| GO | phagocytosis                               | 1 | 27 | 0.989 | 55531 | ELMO/CED-12 domain containing 1                                              |
| GO | 4 iron, 4 sulfur cluster binding           | 1 | 25 | 0.989 | 5558  | primase, DNA, polypeptide 2 (58kDa)                                          |
| GO | positive regulation of T cell proliferati  | 1 | 27 | 0.989 | 5588  | protein kinase C, theta                                                      |
| GO | response to heat                           | 2 | 47 | 0.989 | 5588  | protein kinase C, theta                                                      |
| GO | response to heat                           | 2 | 47 | 0.989 | 6347  | chemokine (C-C motif) ligand 2                                               |
| GO | negative regulation of transforming gro    | 1 | 28 | 0.989 | 5654  | HtrA serine peptidase 1                                                      |
| GO | endomembrane system                        | 2 | 77 | 0.989 | 57099 | apoptosis, caspase activation inhibitor                                      |
| GO | endomembrane system                        | 2 | 77 | 0.989 | 9732  | dedicator of cytokinesis 4                                                   |
| GO | integral to endoplasmic reticulum mem      | 2 | 46 | 0.989 | 57168 | aspartate beta-hydroxylase domain containing 2                               |
| GO | integral to endoplasmic reticulum mem      | 2 | 46 | 0.989 | 79071 | ELOVL family member 6, elongation of long chain fatty acids (FEN1/Elo2, SL   |
| GO | cilium axoneme                             | 1 | 26 | 0.989 | 57560 | intraflagellar transport 80 homolog (Chlamydomonas)                          |
| GO | positive regulation of multicellular orga  | 1 | 23 | 0.989 | 57678 | glycerol-3-phosphate acyltransferase, mitochondrial                          |
| GO | reciprocal meiotic recombination           | 1 | 22 | 0.989 | 5889  | RAD51 homolog C ( <i>S. cerevisiae</i> )                                     |
| GO | regulation of blood pressure               | 1 | 49 | 0.989 | 59    | actin, alpha 2, smooth muscle, aorta                                         |
| GO | activation of MAPK activity                | 1 | 53 | 0.989 | 60675 | prokineticin 2                                                               |
| GO | rRNA binding                               | 1 | 23 | 0.989 | 6133  | ribosomal protein L9                                                         |
| GO | cytosolic large ribosomal subunit          | 1 | 33 | 0.989 | 6154  | ribosomal protein L26                                                        |
| GO | cytosolic small ribosomal subunit          | 1 | 34 | 0.989 | 6204  | ribosomal protein S10                                                        |
| GO | chemokine activity                         | 1 | 42 | 0.989 | 6347  | chemokine (C-C motif) ligand 2                                               |
| GO | response to gamma radiation                | 1 | 24 | 0.989 | 6347  | chemokine (C-C motif) ligand 2                                               |
| GO | response to interleukin-1                  | 1 | 24 | 0.989 | 64131 | xylosyltransferase I                                                         |
| GO | regulation of growth                       | 2 | 51 | 0.989 | 64393 | zinc finger, matrin type 3                                                   |
| GO | regulation of growth                       | 2 | 51 | 0.989 | 8091  | high mobility group AT-hook 2                                                |
| GO | glucose transport                          | 1 | 22 | 0.989 | 6518  | solute carrier family 2 (facilitated glucose/fructose transporter), member 5 |
| GO | heat shock protein binding                 | 1 | 62 | 0.989 | 6546  | solute carrier family 8 (sodium/calcium exchanger), member 1                 |
| GO | response to hydrogen peroxide              | 1 | 40 | 0.989 | 6546  | solute carrier family 8 (sodium/calcium exchanger), member 1                 |
| GO | cation transport                           | 1 | 65 | 0.989 | 6549  | solute carrier family 9 (sodium/hydrogen exchanger), member 2                |
| GO | protein localization                       | 1 | 54 | 0.989 | 6549  | solute carrier family 9 (sodium/hydrogen exchanger), member 2                |
| GO | negative regulation of gene expression     | 1 | 23 | 0.989 | 6586  | slit homolog 3 ( <i>Drosophila</i> )                                         |
| GO | BMP signaling pathway                      | 1 | 43 | 0.989 | 659   | bone morphogenetic protein receptor, type II (serine/threonine kinase)       |
| GO | mesoderm formation                         | 1 | 22 | 0.989 | 659   | bone morphogenetic protein receptor, type II (serine/threonine kinase)       |
| GO | negative regulation of epithelial cell pro | 1 | 26 | 0.989 | 6657  | SRY (sex determining region Y)-box 2                                         |
| GO | negative regulation of neuron differenti   | 1 | 27 | 0.989 | 6657  | SRY (sex determining region Y)-box 2                                         |
| GO | protein stabilization                      | 1 | 31 | 0.989 | 6659  | SRY (sex determining region Y)-box 4                                         |



|    |                                           |   |     |       |                                                                                  |
|----|-------------------------------------------|---|-----|-------|----------------------------------------------------------------------------------|
| GO | protein dimerization activity             | 2 | 84  | 0.989 | 666 BCL2-related ovarian killer                                                  |
| GO | protein dimerization activity             | 2 | 84  | 0.989 | 7021 transcription factor AP-2 beta (activating enhancer binding protein 2 beta) |
| GO | specific RNA polymerase II transcription  | 1 | 33  | 0.989 | 6662 SRY (sex determining region Y)-box 9                                        |
| GO | positive regulation of transcription fact | 1 | 25  | 0.989 | 6672 SP100 nuclear antigen                                                       |
| GO | respiratory gaseous exchange              | 1 | 29  | 0.989 | 669 2,3-bisphosphoglycerate mutase                                               |
| GO | positive regulation of gene-specific tran | 2 | 92  | 0.989 | 672 breast cancer 1, early onset                                                 |
| GO | positive regulation of gene-specific tran | 2 | 92  | 0.989 | 93649 myocardin                                                                  |
| GO | positive regulation of protein ubiquitina | 1 | 25  | 0.989 | 672 breast cancer 1, early onset                                                 |
| GO | mRNA binding                              | 1 | 41  | 0.989 | 6741 Sjogren syndrome antigen B (autoantigen La)                                 |
| GO | tRNA binding                              | 1 | 24  | 0.989 | 6741 Sjogren syndrome antigen B (autoantigen La)                                 |
| GO | palate development                        | 1 | 34  | 0.989 | 7046 transforming growth factor, beta receptor 1                                 |
| GO | peptidyl-serine phosphorylation           | 1 | 26  | 0.989 | 7046 transforming growth factor, beta receptor 1                                 |
| GO | positive regulation of cell growth        | 1 | 34  | 0.989 | 7046 transforming growth factor, beta receptor 1                                 |
| GO | platelet alpha granule lumen              | 1 | 34  | 0.989 | 7058 thrombospondin 2                                                            |
| GO | enzyme inhibitor activity                 | 1 | 27  | 0.989 | 7078 TIMP metalloproteinase inhibitor 3                                          |
| GO | response to hormone stimulus              | 1 | 44  | 0.989 | 7078 TIMP metalloproteinase inhibitor 3                                          |
| GO | calcium-dependent protein binding         | 1 | 31  | 0.989 | 7137 troponin I type 3 (cardiac)                                                 |
| GO | regulation of heart contraction           | 1 | 32  | 0.989 | 7168 tropomyosin 1 (alpha)                                                       |
| GO | ubiquitin-specific protease activity      | 1 | 28  | 0.989 | 7353 ubiquitin fusion degradation 1 like (yeast)                                 |
| GO | positive regulation of gene-specific tran | 1 | 39  | 0.989 | 7490 Wilms tumor 1                                                               |
| GO | transcription regulator activity          | 1 | 102 | 0.989 | 7552 zinc finger protein 711                                                     |
| GO | voltage-gated calcium channel activity    | 1 | 23  | 0.989 | 773 calcium channel, voltage-dependent, P/Q type, alpha 1A subunit               |
| GO | calcium-mediated signaling                | 1 | 33  | 0.989 | 7840 Alstrom syndrome 1                                                          |
| GO | cilium assembly                           | 1 | 24  | 0.989 | 7840 Alstrom syndrome 1                                                          |
| GO | spermatid development                     | 1 | 32  | 0.989 | 7840 Alstrom syndrome 1                                                          |
| GO | regulation of cell cycle                  | 1 | 42  | 0.989 | 80712 ESX homeobox 1                                                             |
| GO | innate immune response                    | 2 | 109 | 0.989 | 81035 collectin sub-family member 12                                             |
| GO | innate immune response                    | 2 | 109 | 0.989 | 8685 macrophage receptor with collagenous structure                              |
| GO | Golgi cisterna membrane                   | 1 | 63  | 0.989 | 84620 ST6 beta-galactosamide alpha-2,6-sialyltransferase 2                       |
| GO | integral to Golgi membrane                | 2 | 45  | 0.989 | 84620 ST6 beta-galactosamide alpha-2,6-sialyltransferase 2                       |
| GO | integral to Golgi membrane                | 2 | 45  | 0.989 | 9215 like-glycosyltransferase                                                    |
| GO | protein amino acid glycosylation          | 3 | 65  | 0.989 | 84620 ST6 beta-galactosamide alpha-2,6-sialyltransferase 2                       |
| GO | protein amino acid glycosylation          | 3 | 65  | 0.989 | 84752 UDP-GlcNAc:betaGal beta-1,3-N-acetylglucosaminyltransferase 9              |
| GO | protein amino acid glycosylation          | 3 | 65  | 0.989 | 9215 like-glycosyltransferase                                                    |
| GO | galactosyltransferase activity            | 1 | 23  | 0.989 | 84752 UDP-GlcNAc:betaGal beta-1,3-N-acetylglucosaminyltransferase 9              |
| GO | cellular membrane organization            | 1 | 53  | 0.989 | 8905 adaptor-related protein complex 1, sigma 2 subunit                          |

|    |                                       |   |    |       |      |                                                         |
|----|---------------------------------------|---|----|-------|------|---------------------------------------------------------|
| GO | post-Golgi vesicle-mediated transport | 1 | 37 | 0.989 | 8905 | adaptor-related protein complex 1, sigma 2 subunit      |
| GO | microtubule associated complex        | 1 | 25 | 0.989 | 9053 | microtubule-associated protein 7                        |
| GO | myelination                           | 1 | 29 | 0.989 | 9076 | claudin 1                                               |
| GO | small GTPase regulator activity       | 1 | 28 | 0.989 | 9448 | mitogen-activated protein kinase kinase kinase kinase 4 |
| GO | sulfotransferase activity             | 1 | 34 | 0.989 | 9653 | heparan sulfate 2-O-sulfotransferase 1                  |

semaphorin) 3C

а)



permeability factor receptor)

synthetase, phosphoribosylaminoimidazole synthetase











a member 1



ation group 8

permeability factor receptor)



semaphorin) 3C







ype 1), member 1

a member 1

ermeability factor receptor)

ation group 8

n, subfamily a-like 1

ransferase 6 (GalNAc-T6)

ransferase 5 (GalNAc-T5)

ransferase 13 (GalNAc-T13)

ransferase 14 (GalNAc-T14)

e)

ype 1), member 1

synthetase, phosphoribosylaminoimidazole synthetase

ollagenase)

a member 1

ype 1), member 1

a)

ation group 8

ember 3

ining



synthetase, phosphoribosylaminoimidazole synthetase

a member 1

ollagenase)

ype 1), member 1

















ype 1), member 1

ermeability factor receptor)





a member 1

permeability factor receptor)

ation group 8

:ation group 8





ation group 8

ollagenase)







ype 1), member 1

ype 1), member 1

ype 1), member 1

ining

nding protein)

Unit 9)





synthetase, phosphoribosylaminoimidazole synthetase  
synthetase, phosphoribosylaminoimidazole synthetase



ype 1), member 1  
ype 1), member 1  
ype 1), member 1

ember 19  
ember 19

JR4/Elo3-like, yeast)

a member 1

synthetase, phosphoribosylaminoimidazole synthetase

ation group 8  
n, subfamily a-like 1

ation group 8



n, subfamily a-like 1

a member 1

permeability factor receptor)

a member 1

e)

e)

e)

a member 1

a member 1

ollagenase)

a)

permeability factor receptor)

synthetase, phosphoribosylaminoimidazole synthetase

e)

n, subfamily a-like 1

a member 1



a member 1



init 9)

ember 19

semaphorin) 3C

permeability factor receptor)

ransferase 5 (GalNAc-T5)

a member 1

semaphorin) 3C  
semaphorin) 3C  
semaphorin) 3C

nding protein)



a member 1



ype 1), member 1





a member 1

ype 1), member 1

a)

permeability factor receptor)

synthetase, phosphoribosylaminoimidazole synthetase

lypeptide, olfactory type  
e)

n, subfamily a-like 1



a member 1



e)

ation group 8



ation group 8

.init 9)

semaphorin) 3C

ation group 8

permeability factor receptor)

synthetase, phosphoribosylaminoimidazole synthetase  
synthetase, phosphoribosylaminoimidazole synthetase

a member 1

a member 1



ype 1), member 1  
ype 1), member 1  
ype 1), member 1

JR4/Elo3-like, yeast)



a member 1

ation group 8



ation group 8

umber 3

ining





n, subfamily a-like 1







semaphorin) 3C

nding protein)



ollagenase)

permeability factor receptor)

permeability factor receptor)



ation group 8

ollagenase)

a member 1

ining

n, subfamily a-like 1

synthetase, phosphoribosylaminoimidazole synthetase





ollagenase)

ype 1), member 1



e)

permeability factor receptor)

olypeptide, olfactory type

ation group 8

synthetase, phosphoribosylaminoimidazole synthetase



synthetase, phosphoribosylaminoimidazole synthetase

ype 1), member 1

ype 1), member 1

a member 1

a member 1

ember 19

permeability factor receptor)

lypeptide, olfactory type

a member 1

ype 1), member 1



lypeptide, olfactory type

semaphorin) 3C  
semaphorin) 3C

ation group 8



synthetase, phosphoribosylaminoimidazole synthetase

ype 1), member 1



n, subfamily a-like 1

ype 1), member 1

ype 1), member 1

synthetase, phosphoribosylaminoimidazole synthetase

ember 4B

permeability factor receptor)

semaphorin) 3C

init 9)

ember 3





init 9)

semaphorin) 3C

lypeptide, olfactory type

ransferase 6 (GalNAc-T6)  
ransferase 5 (GalNAc-T5)  
ransferase 13 (GalNAc-T13)

ransferase 14 (GalNAc-T14)

3)

lypeptide, olfactory type

a)

permeability factor receptor)

synthetase, phosphoribosylaminoimidazole synthetase

e)



a member 1







ype 1), member 1

a member 1



semaphorin) 3C

umber 3

permeability factor receptor)

5

collagenase)

ype 1), member 1





permeability factor receptor)



a member 1

init 9)

ation group 8

permeability factor receptor)

ila); translocated to, 11  
ransferase 5 (GalNAc-T5)

synthetase, phosphoribosylaminoimidazole synthetase

a member 1

ollagenase)

permeability factor receptor)

a member 1



ype 1), member 1

ollagenase)

ype 1), member 1

member 3

type 1), member 1





a member 1

ining

ype 1), member 1  
ype 1), member 1  
ype 1), member 1





4

a member 1  
ollagenase)

ember 4B

permeability factor receptor)

ation group 8

ype 1), member 1



permeability factor receptor)

lypeptide, olfactory type

ollagenase)



ation group 8

ype 1), member 1





umber 3



permeability factor receptor)

a member 1

a member 1









init 9)

ember 19

JR4/Elo3-like, yeast)

ember 3



ember 3

ining

n, subfamily a-like 1



ation group 8

lypeptide, olfactory type

ype 1), member 1

ransferase 6 (GalNAc-T6)  
ransferase 5 (GalNAc-T5)  
ransferase 13 (GalNAc-T13)

ransferase 14 (GalNAc-T14)

ype 1), member 1

nit 9)



ransferase 6 (GalNAc-T6)



init 9)

ype 1), member 1

ransferase 6 (GalNAc-T6)

ransferase 5 (GalNAc-T5)

ransferase 13 (GalNAc-T13)



a member 1

init 9)

ember 19

4

JR4/Elo3-like, yeast)

ransferase 14 (GalNAc-T14)

а)

semaphorin) 3C

transferase 6 (GalNAc-T6)

transferase 5 (GalNAc-T5)

transferase 13 (GalNAc-T13)





init 9)

ember 19

4

JR4/Elo3-like, yeast)

ransferase 14 (GalNAc-T14)

а)

а)

а)

lypeptide, olfactory type







nding protein)

a member 1

ollagenase)



umber 3

umber 4B





ember 19



n, subfamily a-like 1

synthetase, phosphoribosylaminoimidazole synthetase

e)

a member 1

ollagenase)







ransferase 6 (GalNAc-T6)

ollagenase)



4

JR4/Elo3-like, yeast)

a member 1

4

JR4/Elo3-like, yeast)

semaphorin) 3C

semaphorin) 3C

permeability factor receptor)

collagenase)

type 1), member 1

semaphorin) 3C

semaphorin) 3C



permeability factor receptor)



ation group 8

lypeptide, olfactory type

ila); translocated to, 11

ransferase 6 (GalNAc-T6)  
ransferase 5 (GalNAc-T5)  
ransferase 13 (GalNAc-T13)

ransferase 14 (GalNAc-T14)

ollagenase)

4

ransferase 6 (GalNAc-T6)  
ransferase 5 (GalNAc-T5)  
ransferase 13 (GalNAc-T13)  
ransferase 14 (GalNAc-T14)

umber 3



member 3  
type 1), member 1

a member 1

a member 1

n, subfamily a-like 1

permeability factor receptor)



init 9)

ember 19

lypeptide, olfactory type



a member 1



ype 1), member 1

JR4/Elo3-like, yeast)
